# Supplementary material for: 2D or not 2D: Structural and charge ordering at the solid-liquid interface of the 1-(2-hydroxyethyl)-3-methylimidazolium tetrafluoroborate ionic liquid
Source: Royal Society of Chemistry journal article supplement (doi:10.1039/c1fd00043h), 2011-07-15
Supplement: c1fd00043h.alu [file c1fd00043h.alu]

Alumina Potentials (Vessal) in internal units. The numbers below correspond to: i) step; ii) rvdw cuttoff and iii) total number of step.
  1.5212170E-03  7.6000000E+00      5000
Al3+    O_2-
  7.1355002E+06  7.1026532E+06  7.0699574E+06  7.0374122E+06
  7.0050167E+06  6.9727705E+06  6.9406726E+06  6.9087225E+06
  6.8769195E+06  6.8452628E+06  6.8137520E+06  6.7823861E+06
  6.7511647E+06  6.7200869E+06  6.6891522E+06  6.6583600E+06
  6.6277094E+06  6.5972000E+06  6.5668310E+06  6.5366018E+06
  6.5065118E+06  6.4765603E+06  6.4467466E+06  6.4170702E+06
  6.3875304E+06  6.3581266E+06  6.3288581E+06  6.2997244E+06
  6.2707248E+06  6.2418587E+06  6.2131254E+06  6.1845245E+06
  6.1560551E+06  6.1277169E+06  6.0995090E+06  6.0714311E+06
  6.0434824E+06  6.0156623E+06  5.9879704E+06  5.9604059E+06
  5.9329682E+06  5.9056569E+06  5.8784713E+06  5.8514108E+06
  5.8244750E+06  5.7976631E+06  5.7709746E+06  5.7444090E+06
  5.7179657E+06  5.6916440E+06  5.6654436E+06  5.6393638E+06
  5.6134040E+06  5.5875638E+06  5.5618424E+06  5.5362395E+06
  5.5107545E+06  5.4853868E+06  5.4601358E+06  5.4350011E+06
  5.4099821E+06  5.3850782E+06  5.3602890E+06  5.3356139E+06
  5.3110523E+06  5.2866039E+06  5.2622680E+06  5.2380441E+06
  5.2139318E+06  5.1899304E+06  5.1660395E+06  5.1422586E+06
  5.1185872E+06  5.0950247E+06  5.0715707E+06  5.0482247E+06
  5.0249861E+06  5.0018545E+06  4.9788294E+06  4.9559102E+06
  4.9330967E+06  4.9103881E+06  4.8877840E+06  4.8652840E+06
  4.8428876E+06  4.8205942E+06  4.7984035E+06  4.7763149E+06
  4.7543281E+06  4.7324424E+06  4.7106575E+06  4.6889728E+06
  4.6673880E+06  4.6459025E+06  4.6245160E+06  4.6032279E+06
  4.5820378E+06  4.5609452E+06  4.5399497E+06  4.5190509E+06
  4.4982483E+06  4.4775415E+06  4.4569299E+06  4.4364133E+06
  4.4159911E+06  4.3956629E+06  4.3754282E+06  4.3552868E+06
  4.3352380E+06  4.3152815E+06  4.2954170E+06  4.2756438E+06
  4.2559616E+06  4.2363701E+06  4.2168688E+06  4.1974572E+06
  4.1781350E+06  4.1589017E+06  4.1397570E+06  4.1207003E+06
  4.1017315E+06  4.0828499E+06  4.0640553E+06  4.0453472E+06
  4.0267252E+06  4.0081889E+06  3.9897379E+06  3.9713719E+06
  3.9530904E+06  3.9348931E+06  3.9167795E+06  3.8987494E+06
  3.8808022E+06  3.8629376E+06  3.8451554E+06  3.8274548E+06
  3.8098359E+06  3.7922980E+06  3.7748408E+06  3.7574641E+06
  3.7401673E+06  3.7229501E+06  3.7058122E+06  3.6887532E+06
  3.6717727E+06  3.6548704E+06  3.6380459E+06  3.6212988E+06
  3.6046288E+06  3.5880356E+06  3.5715187E+06  3.5550779E+06
  3.5387127E+06  3.5224229E+06  3.5062081E+06  3.4900679E+06
  3.4740020E+06  3.4580101E+06  3.4420918E+06  3.4262468E+06
  3.4104747E+06  3.3947752E+06  3.3791480E+06  3.3635927E+06
  3.3481090E+06  3.3326966E+06  3.3173552E+06  3.3020843E+06
  3.2868838E+06  3.2717532E+06  3.2566923E+06  3.2417007E+06
  3.2267782E+06  3.2119243E+06  3.1971388E+06  3.1824214E+06
  3.1677716E+06  3.1531894E+06  3.1386743E+06  3.1242260E+06
  3.1098442E+06  3.0955286E+06  3.0812789E+06  3.0670948E+06
  3.0529760E+06  3.0389222E+06  3.0249331E+06  3.0110084E+06
  2.9971478E+06  2.9833509E+06  2.9696176E+06  2.9559476E+06
  2.9423404E+06  2.9287958E+06  2.9153137E+06  2.9018936E+06
  2.8885352E+06  2.8752384E+06  2.8620028E+06  2.8488281E+06
  2.8357140E+06  2.8226603E+06  2.8096667E+06  2.7967330E+06
  2.7838587E+06  2.7710438E+06  2.7582878E+06  2.7455905E+06
  2.7329517E+06  2.7203711E+06  2.7078483E+06  2.6953832E+06
  2.6829755E+06  2.6706250E+06  2.6583312E+06  2.6460941E+06
  2.6339133E+06  2.6217886E+06  2.6097197E+06  2.5977063E+06
  2.5857482E+06  2.5738452E+06  2.5619970E+06  2.5502033E+06
  2.5384639E+06  2.5267786E+06  2.5151470E+06  2.5035690E+06
  2.4920443E+06  2.4805726E+06  2.4691538E+06  2.4577874E+06
  2.4464735E+06  2.4352116E+06  2.4240016E+06  2.4128431E+06
  2.4017360E+06  2.3906801E+06  2.3796750E+06  2.3687207E+06
  2.3578167E+06  2.3469629E+06  2.3361591E+06  2.3254050E+06
  2.3147004E+06  2.3040452E+06  2.2934389E+06  2.2828815E+06
  2.2723727E+06  2.2619122E+06  2.2514999E+06  2.2411355E+06
  2.2308189E+06  2.2205498E+06  2.2103279E+06  2.2001530E+06
  2.1900250E+06  2.1799436E+06  2.1699087E+06  2.1599199E+06
  2.1499771E+06  2.1400801E+06  2.1302286E+06  2.1204225E+06
  2.1106616E+06  2.1009455E+06  2.0912742E+06  2.0816474E+06
  2.0720649E+06  2.0625266E+06  2.0530321E+06  2.0435813E+06
  2.0341741E+06  2.0248101E+06  2.0154893E+06  2.0062114E+06
  1.9969761E+06  1.9877834E+06  1.9786331E+06  1.9695248E+06
  1.9604585E+06  1.9514338E+06  1.9424507E+06  1.9335090E+06
  1.9246085E+06  1.9157489E+06  1.9069301E+06  1.8981519E+06
  1.8894141E+06  1.8807166E+06  1.8720590E+06  1.8634414E+06
  1.8548633E+06  1.8463248E+06  1.8378256E+06  1.8293655E+06
  1.8209444E+06  1.8125620E+06  1.8042182E+06  1.7959128E+06
  1.7876456E+06  1.7794166E+06  1.7712254E+06  1.7630718E+06
  1.7549558E+06  1.7468773E+06  1.7388359E+06  1.7308314E+06
  1.7228639E+06  1.7149330E+06  1.7070386E+06  1.6991806E+06
  1.6913587E+06  1.6835729E+06  1.6758228E+06  1.6681085E+06
  1.6604297E+06  1.6527862E+06  1.6451779E+06  1.6376046E+06
  1.6300662E+06  1.6225625E+06  1.6150933E+06  1.6076585E+06
  1.6002580E+06  1.5928915E+06  1.5855589E+06  1.5782601E+06
  1.5709949E+06  1.5637631E+06  1.5565646E+06  1.5493992E+06
  1.5422669E+06  1.5351673E+06  1.5281004E+06  1.5210661E+06
  1.5140642E+06  1.5070945E+06  1.5001568E+06  1.4932511E+06
  1.4863772E+06  1.4795350E+06  1.4727242E+06  1.4659448E+06
  1.4591966E+06  1.4524794E+06  1.4457932E+06  1.4391378E+06
  1.4325130E+06  1.4259187E+06  1.4193547E+06  1.4128210E+06
  1.4063173E+06  1.3998436E+06  1.3933997E+06  1.3869854E+06
  1.3806007E+06  1.3742453E+06  1.3679192E+06  1.3616223E+06
  1.3553543E+06  1.3491152E+06  1.3429048E+06  1.3367230E+06
  1.3305696E+06  1.3244446E+06  1.3183478E+06  1.3122790E+06
  1.3062382E+06  1.3002251E+06  1.2942398E+06  1.2882820E+06
  1.2823516E+06  1.2764486E+06  1.2705727E+06  1.2647238E+06
  1.2589019E+06  1.2531068E+06  1.2473383E+06  1.2415964E+06
  1.2358810E+06  1.2301918E+06  1.2245288E+06  1.2188920E+06
  1.2132810E+06  1.2076959E+06  1.2021365E+06  1.1966027E+06
  1.1910944E+06  1.1856113E+06  1.1801537E+06  1.1747210E+06
  1.1693134E+06  1.1639307E+06  1.1585727E+06  1.1532395E+06
  1.1479307E+06  1.1426465E+06  1.1373865E+06  1.1321507E+06
  1.1269391E+06  1.1217515E+06  1.1165876E+06  1.1114477E+06
  1.1063313E+06  1.1012385E+06  1.0961692E+06  1.0911232E+06
  1.0861004E+06  1.0811007E+06  1.0761241E+06  1.0711703E+06
  1.0662394E+06  1.0613312E+06  1.0564455E+06  1.0515824E+06
  1.0467416E+06  1.0419231E+06  1.0371269E+06  1.0323526E+06
  1.0276004E+06  1.0228700E+06  1.0181614E+06  1.0134745E+06
  1.0088091E+06  1.0041653E+06  9.9954278E+05  9.9494160E+05
  9.9036150E+05  9.8580263E+05  9.8126460E+05  9.7674758E+05
  9.7225125E+05  9.6777570E+05  9.6332070E+05  9.5888625E+05
  9.5447220E+05  9.5007848E+05  9.4570493E+05  9.4135155E+05
  9.3701828E+05  9.3270488E+05  9.2841135E+05  9.2413755E+05
  9.1988348E+05  9.1564890E+05  9.1143390E+05  9.0723833E+05
  9.0306203E+05  8.9890493E+05  8.9476695E+05  8.9064810E+05
  8.8654815E+05  8.8246710E+05  8.7840480E+05  8.7436125E+05
  8.7033630E+05  8.6632988E+05  8.6234183E+05  8.5837223E+05
  8.5442085E+05  8.5048770E+05  8.4657263E+05  8.4267563E+05
  8.3879648E+05  8.3493525E+05  8.3109180E+05  8.2726598E+05
  8.2345785E+05  8.1966720E+05  8.1589403E+05  8.1213818E+05
  8.0839965E+05  8.0467838E+05  8.0097413E+05  7.9728705E+05
  7.9361685E+05  7.8996360E+05  7.8632715E+05  7.8270743E+05
  7.7910435E+05  7.7551793E+05  7.7194800E+05  7.6839443E+05
  7.6485728E+05  7.6133640E+05  7.5783173E+05  7.5434318E+05
  7.5087075E+05  7.4741423E+05  7.4397364E+05  7.4054890E+05
  7.3713992E+05  7.3374663E+05  7.3036896E+05  7.2700685E+05
  7.2366020E+05  7.2032897E+05  7.1701307E+05  7.1371243E+05
  7.1042699E+05  7.0715666E+05  7.0390140E+05  7.0066112E+05
  6.9743576E+05  6.9422524E+05  6.9102950E+05  6.8784848E+05
  6.8468210E+05  6.8153029E+05  6.7839299E+05  6.7527013E+05
  6.7216165E+05  6.6906748E+05  6.6598755E+05  6.6292180E+05
  6.5987016E+05  6.5683257E+05  6.5380896E+05  6.5079927E+05
  6.4780344E+05  6.4482140E+05  6.4185308E+05  6.3889843E+05
  6.3595738E+05  6.3302987E+05  6.3011583E+05  6.2721521E+05
  6.2432794E+05  6.2145396E+05  6.1859321E+05  6.1574564E+05
  6.1291116E+05  6.1008974E+05  6.0728130E+05  6.0448580E+05
  6.0170316E+05  5.9893333E+05  5.9617625E+05  5.9343186E+05
  5.9070011E+05  5.8798093E+05  5.8527427E+05  5.8258007E+05
  5.7989827E+05  5.7722882E+05  5.7457165E+05  5.7192671E+05
  5.6929395E+05  5.6667332E+05  5.6406474E+05  5.6146817E+05
  5.5888355E+05  5.5631084E+05  5.5374997E+05  5.5120088E+05
  5.4866353E+05  5.4613786E+05  5.4362381E+05  5.4112134E+05
  5.3863039E+05  5.3615090E+05  5.3368283E+05  5.3122613E+05
  5.2878072E+05  5.2634657E+05  5.2392364E+05  5.2151186E+05
  5.1911117E+05  5.1672154E+05  5.1434291E+05  5.1197522E+05
  5.0961844E+05  5.0727251E+05  5.0493737E+05  5.0261298E+05
  5.0029930E+05  4.9799627E+05  4.9570383E+05  4.9342195E+05
  4.9115057E+05  4.8888965E+05  4.8663914E+05  4.8439898E+05
  4.8216914E+05  4.7994956E+05  4.7774021E+05  4.7554102E+05
  4.7335196E+05  4.7117297E+05  4.6900401E+05  4.6684504E+05
  4.6469600E+05  4.6255686E+05  4.6042757E+05  4.5830807E+05
  4.5619833E+05  4.5409831E+05  4.5200795E+05  4.4992721E+05
  4.4785606E+05  4.4579444E+05  4.4374231E+05  4.4169962E+05
  4.3966634E+05  4.3764242E+05  4.3562781E+05  4.3362248E+05
  4.3162637E+05  4.2963947E+05  4.2766170E+05  4.2569303E+05
  4.2373344E+05  4.2178286E+05  4.1984126E+05  4.1790860E+05
  4.1598483E+05  4.1406992E+05  4.1216383E+05  4.1026651E+05
  4.0837793E+05  4.0649803E+05  4.0462679E+05  4.0276417E+05
  4.0091012E+05  3.9906461E+05  3.9722758E+05  3.9539902E+05
  3.9357887E+05  3.9176711E+05  3.8996368E+05  3.8816855E+05
  3.8638169E+05  3.8460305E+05  3.8283260E+05  3.8107031E+05
  3.7931612E+05  3.7757000E+05  3.7583193E+05  3.7410186E+05
  3.7237975E+05  3.7066557E+05  3.6895928E+05  3.6726084E+05
  3.6557023E+05  3.6388739E+05  3.6221231E+05  3.6054493E+05
  3.5888522E+05  3.5723316E+05  3.5558870E+05  3.5395182E+05
  3.5232247E+05  3.5070062E+05  3.4908623E+05  3.4747928E+05
  3.4587972E+05  3.4428752E+05  3.4270266E+05  3.4112510E+05
  3.3955479E+05  3.3799171E+05  3.3643583E+05  3.3488711E+05
  3.3334552E+05  3.3181103E+05  3.3028359E+05  3.2876319E+05
  3.2724980E+05  3.2574336E+05  3.2424386E+05  3.2275127E+05
  3.2126554E+05  3.1978665E+05  3.1831457E+05  3.1684927E+05
  3.1539071E+05  3.1393887E+05  3.1249371E+05  3.1105520E+05
  3.0962332E+05  3.0819803E+05  3.0677929E+05  3.0536709E+05
  3.0396139E+05  3.0256216E+05  3.0116937E+05  2.9978300E+05
  2.9840300E+05  2.9702936E+05  2.9566203E+05  2.9430101E+05
  2.9294625E+05  2.9159773E+05  2.9025541E+05  2.8891927E+05
  2.8758929E+05  2.8626542E+05  2.8494765E+05  2.8363595E+05
  2.8233028E+05  2.8103063E+05  2.7973695E+05  2.7844924E+05
  2.7716745E+05  2.7589156E+05  2.7462155E+05  2.7335738E+05
  2.7209903E+05  2.7084647E+05  2.6959967E+05  2.6835862E+05
  2.6712329E+05  2.6589363E+05  2.6466964E+05  2.6345128E+05
  2.6223853E+05  2.6103137E+05  2.5982975E+05  2.5863368E+05
  2.5744310E+05  2.5625801E+05  2.5507838E+05  2.5390417E+05
  2.5273537E+05  2.5157195E+05  2.5041389E+05  2.4926115E+05
  2.4811372E+05  2.4697157E+05  2.4583469E+05  2.4470303E+05
  2.4357659E+05  2.4245533E+05  2.4133923E+05  2.4022827E+05
  2.3912243E+05  2.3802167E+05  2.3692598E+05  2.3583533E+05
  2.3474971E+05  2.3366909E+05  2.3259343E+05  2.3152273E+05
  2.3045696E+05  2.2939609E+05  2.2834011E+05  2.2728899E+05
  2.2624271E+05  2.2520124E+05  2.2416457E+05  2.2313267E+05
  2.2210552E+05  2.2108310E+05  2.2006538E+05  2.1905235E+05
  2.1804398E+05  2.1704026E+05  2.1604115E+05  2.1504665E+05
  2.1405672E+05  2.1307135E+05  2.1209051E+05  2.1111419E+05
  2.1014237E+05  2.0917502E+05  2.0821212E+05  2.0725365E+05
  2.0629960E+05  2.0534994E+05  2.0440465E+05  2.0346371E+05
  2.0252710E+05  2.0159480E+05  2.0066680E+05  1.9974307E+05
  1.9882359E+05  1.9790834E+05  1.9699730E+05  1.9609046E+05
  1.9518780E+05  1.9428929E+05  1.9339491E+05  1.9250465E+05
  1.9161850E+05  1.9073642E+05  1.8985840E+05  1.8898442E+05
  1.8811446E+05  1.8724851E+05  1.8638655E+05  1.8552855E+05
  1.8467450E+05  1.8382439E+05  1.8297819E+05  1.8213588E+05
  1.8129746E+05  1.8046289E+05  1.7963216E+05  1.7880526E+05
  1.7798216E+05  1.7716285E+05  1.7634731E+05  1.7553553E+05
  1.7472749E+05  1.7392316E+05  1.7312254E+05  1.7232560E+05
  1.7153233E+05  1.7074271E+05  1.6995673E+05  1.6917437E+05
  1.6839560E+05  1.6762043E+05  1.6684882E+05  1.6608076E+05
  1.6531624E+05  1.6455524E+05  1.6379774E+05  1.6304372E+05
  1.6229318E+05  1.6154609E+05  1.6080245E+05  1.6006222E+05
  1.5932540E+05  1.5859198E+05  1.5786193E+05  1.5713525E+05
  1.5641190E+05  1.5569189E+05  1.5497519E+05  1.5426179E+05
  1.5355167E+05  1.5284483E+05  1.5214124E+05  1.5144088E+05
  1.5074375E+05  1.5004983E+05  1.4935910E+05  1.4867156E+05
  1.4798717E+05  1.4730594E+05  1.4662784E+05  1.4595287E+05
  1.4528100E+05  1.4461223E+05  1.4394653E+05  1.4328390E+05
  1.4262432E+05  1.4196778E+05  1.4131425E+05  1.4066374E+05
  1.4001622E+05  1.3937168E+05  1.3873011E+05  1.3809149E+05
  1.3745582E+05  1.3682306E+05  1.3619322E+05  1.3556628E+05
  1.3494223E+05  1.3432105E+05  1.3370273E+05  1.3308725E+05
  1.3247461E+05  1.3186478E+05  1.3125777E+05  1.3065355E+05
  1.3005211E+05  1.2945344E+05  1.2885752E+05  1.2826435E+05
  1.2767391E+05  1.2708619E+05  1.2650117E+05  1.2591884E+05
  1.2533920E+05  1.2476222E+05  1.2418790E+05  1.2361622E+05
  1.2304718E+05  1.2248076E+05  1.2191694E+05  1.2135572E+05
  1.2079708E+05  1.2024101E+05  1.1968751E+05  1.1913655E+05
  1.1858813E+05  1.1804222E+05  1.1749884E+05  1.1695796E+05
  1.1641956E+05  1.1588364E+05  1.1535020E+05  1.1481920E+05
  1.1429066E+05  1.1376454E+05  1.1324084E+05  1.1271956E+05
  1.1220068E+05  1.1168418E+05  1.1117006E+05  1.1065832E+05
  1.1014892E+05  1.0964187E+05  1.0913715E+05  1.0863476E+05
  1.0813468E+05  1.0763690E+05  1.0714142E+05  1.0664821E+05
  1.0615727E+05  1.0566860E+05  1.0518218E+05  1.0469798E+05
  1.0421603E+05  1.0373629E+05  1.0325876E+05  1.0278343E+05
  1.0231028E+05  1.0183931E+05  1.0137052E+05  1.0090388E+05
  1.0043939E+05  9.9977025E+04  9.9516803E+04  9.9058695E+04
  9.8602695E+04  9.8148795E+04  9.7696988E+04  9.7247258E+04
  9.6799598E+04  9.6354000E+04  9.5910450E+04  9.5468948E+04
  9.5029470E+04  9.4592018E+04  9.4156583E+04  9.3723150E+04
  9.3291713E+04  9.2862263E+04  9.2434793E+04  9.2009280E+04
  9.1585733E+04  9.1164135E+04  9.0744480E+04  9.0326753E+04
  8.9910953E+04  8.9497065E+04  8.9085083E+04  8.8674990E+04
  8.8266795E+04  8.7860475E+04  8.7456023E+04  8.7053438E+04
  8.6652705E+04  8.6253810E+04  8.5856760E+04  8.5461533E+04
  8.5068128E+04  8.4676530E+04  8.4286740E+04  8.3898743E+04
  8.3512530E+04  8.3128095E+04  8.2745430E+04  8.2364528E+04
  8.1985380E+04  8.1607973E+04  8.1232305E+04  8.0858370E+04
  8.0486153E+04  8.0115645E+04  7.9746848E+04  7.9379753E+04
  7.9014338E+04  7.8650610E+04  7.8288555E+04  7.7928173E+04
  7.7569440E+04  7.7212365E+04  7.6856933E+04  7.6503135E+04
  7.6150973E+04  7.5800423E+04  7.5430650E+04  7.5083393E+04
  7.4737738E+04  7.4393666E+04  7.4051173E+04  7.3710248E+04
  7.3370884E+04  7.3033071E+04  7.2696800E+04  7.2362065E+04
  7.2028854E+04  7.1697161E+04  7.1366976E+04  7.1038291E+04
  7.0711097E+04  7.0385387E+04  7.0061153E+04  6.9738384E+04
  6.9417074E+04  6.9097214E+04  6.8778796E+04  6.8461812E+04
  6.8146253E+04  6.7832113E+04  6.7519382E+04  6.7208053E+04
  6.6898118E+04  6.6589568E+04  6.6282398E+04  6.5976596E+04
  6.5672159E+04  6.5369075E+04  6.5067339E+04  6.4766943E+04
  6.4467879E+04  6.4170139E+04  6.3873716E+04  6.3578603E+04
  6.3284792E+04  6.2992276E+04  6.2701046E+04  6.2411098E+04
  6.2122421E+04  6.1835011E+04  6.1548859E+04  6.1263958E+04
  6.0980302E+04  6.0697882E+04  6.0416693E+04  6.0136727E+04
  5.9857976E+04  5.9580435E+04  5.9304097E+04  5.9028954E+04
  5.8755000E+04  5.8482227E+04  5.8210631E+04  5.7940202E+04
  5.7670937E+04  5.7402826E+04  5.7135863E+04  5.6870044E+04
  5.6605360E+04  5.6341805E+04  5.6079374E+04  5.5818059E+04
  5.5557854E+04  5.5298754E+04  5.5040751E+04  5.4783839E+04
  5.4528013E+04  5.4273266E+04  5.4019592E+04  5.3766985E+04
  5.3515439E+04  5.3264948E+04  5.3015505E+04  5.2767106E+04
  5.2519743E+04  5.2273412E+04  5.2028107E+04  5.1783821E+04
  5.1540548E+04  5.1298285E+04  5.1057023E+04  5.0816758E+04
  5.0577485E+04  5.0339197E+04  5.0101889E+04  4.9865556E+04
  4.9630193E+04  4.9395792E+04  4.9162350E+04  4.8929861E+04
  4.8698319E+04  4.8467720E+04  4.8238057E+04  4.8009326E+04
  4.7781522E+04  4.7554640E+04  4.7328673E+04  4.7103617E+04
  4.6879468E+04  4.6656220E+04  4.6433867E+04  4.6212407E+04
  4.5991832E+04  4.5772138E+04  4.5553320E+04  4.5335374E+04
  4.5118295E+04  4.4902078E+04  4.4686718E+04  4.4472210E+04
  4.4258550E+04  4.4045734E+04  4.3833755E+04  4.3622612E+04
  4.3412297E+04  4.3202807E+04  4.2994138E+04  4.2786284E+04
  4.2579242E+04  4.2373007E+04  4.2167576E+04  4.1962942E+04
  4.1759102E+04  4.1556053E+04  4.1353789E+04  4.1152306E+04
  4.0951601E+04  4.0751669E+04  4.0552505E+04  4.0354106E+04
  4.0156469E+04  3.9959588E+04  3.9763460E+04  3.9568080E+04
  3.9373445E+04  3.9179552E+04  3.8986394E+04  3.8793971E+04
  3.8602277E+04  3.8411308E+04  3.8221061E+04  3.8031532E+04
  3.7842717E+04  3.7654613E+04  3.7467216E+04  3.7280522E+04
  3.7094528E+04  3.6909230E+04  3.6724625E+04  3.6540708E+04
  3.6357477E+04  3.6174929E+04  3.5993058E+04  3.5811863E+04
  3.5631341E+04  3.5451486E+04  3.5272297E+04  3.5093769E+04
  3.4915901E+04  3.4738687E+04  3.4562126E+04  3.4386213E+04
  3.4210946E+04  3.4036322E+04  3.3862337E+04  3.3688988E+04
  3.3516274E+04  3.3344189E+04  3.3172731E+04  3.3001898E+04
  3.2831686E+04  3.2662092E+04  3.2493113E+04  3.2324747E+04
  3.2156991E+04  3.1989842E+04  3.1823296E+04  3.1657352E+04
  3.1492006E+04  3.1327256E+04  3.1163098E+04  3.0999531E+04
  3.0836552E+04  3.0674156E+04  3.0512344E+04  3.0351111E+04
  3.0190455E+04  3.0030374E+04  2.9870865E+04  2.9711925E+04
  2.9553552E+04  2.9395744E+04  2.9238497E+04  2.9081811E+04
  2.8925681E+04  2.8770107E+04  2.8615085E+04  2.8460613E+04
  2.8306689E+04  2.8153311E+04  2.8000476E+04  2.7848182E+04
  2.7696427E+04  2.7545208E+04  2.7394524E+04  2.7244372E+04
  2.7094751E+04  2.6945657E+04  2.6797089E+04  2.6649045E+04
  2.6501523E+04  2.6354521E+04  2.6208036E+04  2.6062067E+04
  2.5916612E+04  2.5771670E+04  2.5627236E+04  2.5483311E+04
  2.5339892E+04  2.5196977E+04  2.5054564E+04  2.4912652E+04
  2.4771239E+04  2.4630322E+04  2.4489901E+04  2.4349973E+04
  2.4210536E+04  2.4071590E+04  2.3933132E+04  2.3795159E+04
  2.3657672E+04  2.3520669E+04  2.3384147E+04  2.3248105E+04
  2.3112541E+04  2.2977454E+04  2.2842842E+04  2.2708704E+04
  2.2575038E+04  2.2441843E+04  2.2309116E+04  2.2176858E+04
  2.2045066E+04  2.1913739E+04  2.1782875E+04  2.1652472E+04
  2.1522531E+04  2.1393049E+04  2.1264025E+04  2.1135457E+04
  2.1007344E+04  2.0879686E+04  2.0752480E+04  2.0625725E+04
  2.0499421E+04  2.0373565E+04  2.0248157E+04  2.0123195E+04
  1.9998679E+04  1.9874606E+04  1.9750976E+04  1.9627789E+04
  1.9505041E+04  1.9382733E+04  1.9260864E+04  1.9139432E+04
  1.9018436E+04  1.8897875E+04  1.8777747E+04  1.8658053E+04
  1.8538792E+04  1.8419960E+04  1.8301559E+04  1.8183587E+04
  1.8066044E+04  1.7948927E+04  1.7832236E+04  1.7715971E+04
  1.7600130E+04  1.7484712E+04  1.7369717E+04  1.7255144E+04
  1.7140991E+04  1.7027258E+04  1.6913944E+04  1.6801049E+04
  1.6688570E+04  1.6576509E+04  1.6464863E+04  1.6353633E+04
  1.6242817E+04  1.6132414E+04  1.6022424E+04  1.5912846E+04
  1.5803680E+04  1.5694924E+04  1.5586578E+04  1.5478642E+04
  1.5371114E+04  1.5263993E+04  1.5157280E+04  1.5050975E+04
  1.4945074E+04  1.4839579E+04  1.4734489E+04  1.4629802E+04
  1.4525520E+04  1.4421640E+04  1.4318163E+04  1.4215087E+04
  1.4112413E+04  1.4010139E+04  1.3908266E+04  1.3806792E+04
  1.3705717E+04  1.3605041E+04  1.3504763E+04  1.3404882E+04
  1.3305398E+04  1.3206311E+04  1.3107621E+04  1.3009326E+04
  1.2911426E+04  1.2813921E+04  1.2716810E+04  1.2620093E+04
  1.2523770E+04  1.2427840E+04  1.2332303E+04  1.2237158E+04
  1.2142404E+04  1.2048042E+04  1.1954072E+04  1.1860491E+04
  1.1767301E+04  1.1674502E+04  1.1582092E+04  1.1490071E+04
  1.1398439E+04  1.1307197E+04  1.1216342E+04  1.1125875E+04
  1.1035796E+04  1.0946105E+04  1.0856800E+04  1.0767882E+04
  1.0679351E+04  1.0591206E+04  1.0503446E+04  1.0416073E+04
  1.0329085E+04  1.0242482E+04  1.0156263E+04  1.0070429E+04
  9.9849795E+03  9.8999145E+03  9.8152328E+03  9.7309343E+03
  9.6470198E+03  9.5634885E+03  9.4803390E+03  9.3975735E+03
  9.3151898E+03  9.2331878E+03  9.1515683E+03  9.0703305E+03
  8.9894745E+03  8.9089995E+03  8.8289063E+03  8.7491933E+03
  8.6698613E+03  8.5909095E+03  8.5123388E+03  8.4341475E+03
  8.3563365E+03  8.2789058E+03  8.2018538E+03  8.1251820E+03
  8.0488890E+03  7.9729755E+03  7.8974408E+03  7.8222840E+03
  7.7475068E+03  7.6731075E+03  7.5990863E+03  7.5254430E+03
  7.4521779E+03  7.3792904E+03  7.3067804E+03  7.2346477E+03
  7.1628921E+03  7.0915136E+03  7.0205120E+03  6.9498869E+03
  6.8796384E+03  6.8097662E+03  6.7402703E+03  6.6711503E+03
  6.6024061E+03  6.5340376E+03  6.4660445E+03  6.3984269E+03
  6.3311843E+03  6.2643167E+03  6.1978239E+03  6.1317057E+03
  6.0659620E+03  6.0005925E+03  5.9355972E+03  5.8709757E+03
  5.8067280E+03  5.7428538E+03  5.6793530E+03  5.6162252E+03
  5.5534706E+03  5.4910886E+03  5.4290793E+03  5.3674423E+03
  5.3061775E+03  5.2452847E+03  5.1847637E+03  5.1246141E+03
  5.0648360E+03  5.0054289E+03  4.9463928E+03  4.8877274E+03
  4.8294323E+03  4.7715076E+03  4.7139528E+03  4.6567677E+03
  4.5999522E+03  4.5435059E+03  4.4874286E+03  4.4317201E+03
  4.3763800E+03  4.3214081E+03  4.2668043E+03  4.2125681E+03
  4.1586993E+03  4.1051976E+03  4.0520627E+03  3.9992944E+03
  3.9468923E+03  3.8948560E+03  3.8431854E+03  3.7918801E+03
  3.7409398E+03  3.6903641E+03  3.6401526E+03  3.5903052E+03
  3.5408213E+03  3.4917008E+03  3.4429431E+03  3.3945479E+03
  3.3465149E+03  3.2988437E+03  3.2515338E+03  3.2045849E+03
  3.1579967E+03  3.1117685E+03  3.0659002E+03  3.0203912E+03
  2.9752410E+03  2.9304494E+03  2.8860157E+03  2.8419396E+03
  2.7982205E+03  2.7548582E+03  2.7118519E+03  2.6692013E+03
  2.6269058E+03  2.5849649E+03  2.5433783E+03  2.5021451E+03
  2.4612651E+03  2.4207376E+03  2.3805621E+03  2.3407379E+03
  2.3012647E+03  2.2621416E+03  2.2233683E+03  2.1849440E+03
  2.1468682E+03  2.1091403E+03  2.0717595E+03  2.0347253E+03
  1.9980371E+03  1.9616940E+03  1.9256957E+03  1.8900411E+03
  1.8547298E+03  1.8197611E+03  1.7851341E+03  1.7508482E+03
  1.7169026E+03  1.6832967E+03  1.6500296E+03  1.6171004E+03
  1.5845086E+03  1.5522533E+03  1.5203336E+03  1.4887487E+03
  1.4574980E+03  1.4265803E+03  1.3959950E+03  1.3657412E+03
  1.3358179E+03  1.3062242E+03  1.2769594E+03  1.2480224E+03
  1.2194123E+03  1.1911283E+03  1.1631692E+03  1.1355341E+03
  1.1082221E+03  1.0812321E+03  1.0545632E+03  1.0282144E+03
  1.0021844E+03  9.7647240E+02  9.5107733E+02  9.2599793E+02
  9.0123323E+02  8.7678203E+02  8.5264335E+02  8.2881585E+02
  8.0529855E+02  7.8209018E+02  7.5918960E+02  7.3659561E+02
  7.1430695E+02  6.9232241E+02  6.7064074E+02  6.4926068E+02
  6.2818094E+02  6.0740024E+02  5.8691725E+02  5.6673066E+02
  5.4683912E+02  5.2724127E+02  5.0793573E+02  4.8892112E+02
  4.7019601E+02  4.5175898E+02  4.3360860E+02  4.1574340E+02
  3.9816191E+02  3.8086262E+02  3.6384402E+02  3.4710460E+02
  3.3064279E+02  3.1445705E+02  2.9854577E+02  2.8290737E+02
  2.6754022E+02  2.5244270E+02  2.3761313E+02  2.2304986E+02
  2.0875119E+02  1.9471541E+02  1.8094079E+02  1.6742558E+02
  1.5416803E+02  1.4116634E+02  1.2841871E+02  1.1592330E+02
  1.0367830E+02  9.1681815E+01  7.9931985E+01  6.8426904E+01
  5.7164645E+01  4.6143269E+01  3.5360815E+01  2.4815301E+01
  1.4504726E+01  4.4270664E+00 -5.4197189E+00 -1.5037694E+01
 -2.4428942E+01 -3.3595568E+01 -4.2539697E+01 -5.1263477E+01
 -5.9769074E+01 -6.8058679E+01 -7.6134503E+01 -8.3998770E+01
 -9.1653750E+01 -9.9101700E+01 -1.0634493E+02 -1.1338575E+02
 -1.2022651E+02 -1.2686956E+02 -1.3331730E+02 -1.3957213E+02
 -1.4563648E+02 -1.5151280E+02 -1.5720358E+02 -1.6271131E+02
 -1.6803850E+02 -1.7318771E+02 -1.7816150E+02 -1.8296246E+02
 -1.8759321E+02 -1.9205639E+02 -1.9635465E+02 -2.0049068E+02
 -2.0446720E+02 -2.0828693E+02 -2.1195263E+02 -2.1546707E+02
 -2.1883308E+02 -2.2205348E+02 -2.2513111E+02 -2.2806887E+02
 -2.3086964E+02 -2.3353638E+02 -2.3607202E+02 -2.3847954E+02
 -2.4076195E+02 -2.4292228E+02 -2.4496358E+02 -2.4688894E+02
 -2.4870145E+02 -2.5040425E+02 -2.5200050E+02 -2.5349338E+02
 -2.5488610E+02 -2.5618190E+02 -2.5738403E+02 -2.5849579E+02
 -2.5952048E+02 -2.6046146E+02 -2.6132210E+02 -2.6210577E+02
 -2.6281592E+02 -2.6345598E+02 -2.6402943E+02 -2.6453978E+02
 -2.6499056E+02 -2.6538533E+02 -2.6572767E+02 -2.6602121E+02
 -2.6626956E+02 -2.6647643E+02 -2.6664548E+02 -2.6678046E+02
 -2.6688512E+02 -2.6696325E+02 -2.6701865E+02 -2.6705517E+02
 -2.6707667E+02 -2.6708705E+02 -2.6709024E+02 -2.6712061E+02
 -2.6711893E+02 -2.6711569E+02 -2.6711089E+02 -2.6710455E+02
 -2.6709666E+02 -2.6708723E+02 -2.6707627E+02 -2.6706377E+02
 -2.6704973E+02 -2.6703417E+02 -2.6701709E+02 -2.6699849E+02
 -2.6697836E+02 -2.6695673E+02 -2.6693358E+02 -2.6690893E+02
 -2.6688278E+02 -2.6685512E+02 -2.6682598E+02 -2.6679534E+02
 -2.6676321E+02 -2.6672960E+02 -2.6669450E+02 -2.6665793E+02
 -2.6661989E+02 -2.6658037E+02 -2.6653939E+02 -2.6649695E+02
 -2.6645303E+02 -2.6640767E+02 -2.6636086E+02 -2.6631260E+02
 -2.6626289E+02 -2.6621174E+02 -2.6615915E+02 -2.6610512E+02
 -2.6604966E+02 -2.6599278E+02 -2.6593447E+02 -2.6587475E+02
 -2.6581360E+02 -2.6575104E+02 -2.6568707E+02 -2.6562170E+02
 -2.6555492E+02 -2.6548674E+02 -2.6541716E+02 -2.6534620E+02
 -2.6527385E+02 -2.6520011E+02 -2.6512499E+02 -2.6504849E+02
 -2.6497062E+02 -2.6489138E+02 -2.6481077E+02 -2.6472879E+02
 -2.6464546E+02 -2.6456077E+02 -2.6447473E+02 -2.6438733E+02
 -2.6429859E+02 -2.6420852E+02 -2.6411710E+02 -2.6402434E+02
 -2.6393026E+02 -2.6383484E+02 -2.6373810E+02 -2.6364005E+02
 -2.6354067E+02 -2.6343998E+02 -2.6333798E+02 -2.6323467E+02
 -2.6313006E+02 -2.6302415E+02 -2.6291695E+02 -2.6280845E+02
 -2.6269867E+02 -2.6258759E+02 -2.6247524E+02 -2.6236161E+02
 -2.6224671E+02 -2.6213053E+02 -2.6201309E+02 -2.6189438E+02
 -2.6177441E+02 -2.6165319E+02 -2.6153071E+02 -2.6140698E+02
 -2.6128201E+02 -2.6115580E+02 -2.6102834E+02 -2.6089965E+02
 -2.6076973E+02 -2.6063858E+02 -2.6050621E+02 -2.6037261E+02
 -2.6023780E+02 -2.6010177E+02 -2.5996454E+02 -2.5982609E+02
 -2.5968644E+02 -2.5954560E+02 -2.5940356E+02 -2.5926032E+02
 -2.5911590E+02 -2.5897028E+02 -2.5882349E+02 -2.5867553E+02
 -2.5852638E+02 -2.5837607E+02 -2.5822458E+02 -2.5807193E+02
 -2.5791812E+02 -2.5776316E+02 -2.5760705E+02 -2.5744978E+02
 -2.5729136E+02 -2.5713180E+02 -2.5697111E+02 -2.5680928E+02
 -2.5664631E+02 -2.5648222E+02 -2.5631701E+02 -2.5615067E+02
 -2.5598321E+02 -2.5581464E+02 -2.5564496E+02 -2.5547417E+02
 -2.5530228E+02 -2.5512929E+02 -2.5495520E+02 -2.5478003E+02
 -2.5460375E+02 -2.5442640E+02 -2.5424797E+02 -2.5406845E+02
 -2.5388786E+02 -2.5370620E+02 -2.5352347E+02 -2.5333967E+02
 -2.5315482E+02 -2.5296891E+02 -2.5278194E+02 -2.5259393E+02
 -2.5240487E+02 -2.5221476E+02 -2.5202362E+02 -2.5183144E+02
 -2.5163822E+02 -2.5144399E+02 -2.5124872E+02 -2.5105244E+02
 -2.5085513E+02 -2.5065681E+02 -2.5045748E+02 -2.5025714E+02
 -2.5005580E+02 -2.4985346E+02 -2.4965012E+02 -2.4944579E+02
 -2.4924047E+02 -2.4903416E+02 -2.4882688E+02 -2.4861861E+02
 -2.4840937E+02 -2.4819915E+02 -2.4798797E+02 -2.4777583E+02
 -2.4756272E+02 -2.4734865E+02 -2.4713363E+02 -2.4691766E+02
 -2.4670075E+02 -2.4648289E+02 -2.4626409E+02 -2.4604436E+02
 -2.4582369E+02 -2.4560210E+02 -2.4537958E+02 -2.4515613E+02
 -2.4493178E+02 -2.4470650E+02 -2.4448031E+02 -2.4425322E+02
 -2.4402522E+02 -2.4379632E+02 -2.4356653E+02 -2.4333584E+02
 -2.4310427E+02 -2.4287180E+02 -2.4263846E+02 -2.4240423E+02
 -2.4216913E+02 -2.4193316E+02 -2.4169631E+02 -2.4145861E+02
 -2.4122004E+02 -2.4098062E+02 -2.4074034E+02 -2.4049921E+02
 -2.4025724E+02 -2.4001442E+02 -2.3977076E+02 -2.3952626E+02
 -2.3928094E+02 -2.3903478E+02 -2.3878780E+02 -2.3853999E+02
 -2.3829137E+02 -2.3804193E+02 -2.3779169E+02 -2.3754063E+02
 -2.3728877E+02 -2.3703611E+02 -2.3678265E+02 -2.3652840E+02
 -2.3627336E+02 -2.3601753E+02 -2.3576092E+02 -2.3550353E+02
 -2.3524536E+02 -2.3498642E+02 -2.3472672E+02 -2.3446625E+02
 -2.3420502E+02 -2.3394303E+02 -2.3368028E+02 -2.3341679E+02
 -2.3315255E+02 -2.3288756E+02 -2.3262184E+02 -2.3235537E+02
 -2.3208818E+02 -2.3182025E+02 -2.3155160E+02 -2.3128223E+02
 -2.3101214E+02 -2.3074133E+02 -2.3046982E+02 -2.3019760E+02
 -2.2992467E+02 -2.2965104E+02 -2.2937671E+02 -2.2910168E+02
 -2.2882598E+02 -2.2854958E+02 -2.2827250E+02 -2.2799474E+02
 -2.2771630E+02 -2.2743719E+02 -2.2715741E+02 -2.2687697E+02
 -2.2659587E+02 -2.2631411E+02 -2.2603169E+02 -2.2574862E+02
 -2.2546491E+02 -2.2518055E+02 -2.2489555E+02 -2.2460992E+02
 -2.2432364E+02 -2.2403675E+02 -2.2374923E+02 -2.2346108E+02
 -2.2317231E+02 -2.2288293E+02 -2.2259294E+02 -2.2230234E+02
 -2.2201114E+02 -2.2171933E+02 -2.2142693E+02 -2.2113393E+02
 -2.2084034E+02 -2.2054616E+02 -2.2025141E+02 -2.1995607E+02
 -2.1966016E+02 -2.1936367E+02 -2.1906662E+02 -2.1876899E+02
 -2.1847082E+02 -2.1817208E+02 -2.1787278E+02 -2.1757293E+02
 -2.1727254E+02 -2.1697160E+02 -2.1667013E+02 -2.1636811E+02
 -2.1606556E+02 -2.1576248E+02 -2.1545888E+02 -2.1515475E+02
 -2.1485011E+02 -2.1454494E+02 -2.1423927E+02 -2.1393309E+02
 -2.1362640E+02 -2.1331922E+02 -2.1301153E+02 -2.1270335E+02
 -2.1239468E+02 -2.1208552E+02 -2.1177588E+02 -2.1146576E+02
 -2.1115516E+02 -2.1084410E+02 -2.1053255E+02 -2.1022055E+02
 -2.0990808E+02 -2.0959516E+02 -2.0928178E+02 -2.0896795E+02
 -2.0865367E+02 -2.0833895E+02 -2.0802378E+02 -2.0770818E+02
 -2.0739215E+02 -2.0707568E+02 -2.0675879E+02 -2.0644148E+02
 -2.0612374E+02 -2.0580560E+02 -2.0548703E+02 -2.0516806E+02
 -2.0484869E+02 -2.0452891E+02 -2.0420873E+02 -2.0388817E+02
 -2.0356721E+02 -2.0324586E+02 -2.0292413E+02 -2.0260202E+02
 -2.0227954E+02 -2.0195668E+02 -2.0163344E+02 -2.0130985E+02
 -2.0098589E+02 -2.0066158E+02 -2.0033690E+02 -2.0001188E+02
 -1.9968651E+02 -1.9936080E+02 -1.9903475E+02 -1.9870835E+02
 -1.9838162E+02 -1.9805456E+02 -1.9772718E+02 -1.9739948E+02
 -1.9707145E+02 -1.9674311E+02 -1.9641445E+02 -1.9608548E+02
 -1.9575622E+02 -1.9542665E+02 -1.9509677E+02 -1.9476662E+02
 -1.9443616E+02 -1.9410542E+02 -1.9377439E+02 -1.9344308E+02
 -1.9311150E+02 -1.9277965E+02 -1.9244752E+02 -1.9211513E+02
 -1.9178247E+02 -1.9144956E+02 -1.9111639E+02 -1.9078297E+02
 -1.9044930E+02 -1.9011539E+02 -1.8978123E+02 -1.8944684E+02
 -1.8911222E+02 -1.8877736E+02 -1.8844228E+02 -1.8810697E+02
 -1.8777144E+02 -1.8743570E+02 -1.8709975E+02 -1.8676358E+02
 -1.8642721E+02 -1.8609064E+02 -1.8575387E+02 -1.8541691E+02
 -1.8507975E+02 -1.8474240E+02 -1.8440488E+02 -1.8406717E+02
 -1.8372929E+02 -1.8339122E+02 -1.8305300E+02 -1.8271460E+02
 -1.8237605E+02 -1.8203732E+02 -1.8169845E+02 -1.8135943E+02
 -1.8102026E+02 -1.8068094E+02 -1.8034148E+02 -1.8000188E+02
 -1.7966215E+02 -1.7932229E+02 -1.7898230E+02 -1.7864219E+02
 -1.7830196E+02 -1.7796161E+02 -1.7762114E+02 -1.7728058E+02
 -1.7693990E+02 -1.7659912E+02 -1.7625824E+02 -1.7591726E+02
 -1.7557620E+02 -1.7523505E+02 -1.7489381E+02 -1.7455250E+02
 -1.7421110E+02 -1.7386964E+02 -1.7352810E+02 -1.7318649E+02
 -1.7284483E+02 -1.7250310E+02 -1.7216132E+02 -1.7181948E+02
 -1.7147760E+02 -1.7113567E+02 -1.7079370E+02 -1.7045169E+02
 -1.7010965E+02 -1.6976757E+02 -1.6942547E+02 -1.6908335E+02
 -1.6874120E+02 -1.6839904E+02 -1.6805687E+02 -1.6771469E+02
 -1.6737249E+02 -1.6703030E+02 -1.6668811E+02 -1.6634592E+02
 -1.6600374E+02 -1.6566158E+02 -1.6531943E+02 -1.6497730E+02
 -1.6463519E+02 -1.6429310E+02 -1.6395105E+02 -1.6360903E+02
 -1.6326704E+02 -1.6292510E+02 -1.6258320E+02 -1.6224135E+02
 -1.6189955E+02 -1.6155781E+02 -1.6121612E+02 -1.6087449E+02
 -1.6053293E+02 -1.6019144E+02 -1.5985002E+02 -1.5950868E+02
 -1.5916742E+02 -1.5882623E+02 -1.5848514E+02 -1.5814414E+02
 -1.5780323E+02 -1.5746241E+02 -1.5712170E+02 -1.5678110E+02
 -1.5644060E+02 -1.5610021E+02 -1.5575994E+02 -1.5541979E+02
 -1.5507976E+02 -1.5473985E+02 -1.5440008E+02 -1.5406043E+02
 -1.5372092E+02 -1.5338156E+02 -1.5304234E+02 -1.5270326E+02
 -1.5236434E+02 -1.5202557E+02 -1.5168696E+02 -1.5134851E+02
 -1.5101023E+02 -1.5067211E+02 -1.5033416E+02 -1.4999640E+02
 -1.4965881E+02 -1.4932140E+02 -1.4898419E+02 -1.4864716E+02
 -1.4831032E+02 -1.4797368E+02 -1.4763725E+02 -1.4730101E+02
 -1.4696498E+02 -1.4662917E+02 -1.4629357E+02 -1.4595819E+02
 -1.4562303E+02 -1.4528810E+02 -1.4495339E+02 -1.4461892E+02
 -1.4428469E+02 -1.4395070E+02 -1.4361695E+02 -1.4328344E+02
 -1.4295019E+02 -1.4261719E+02 -1.4228445E+02 -1.4195197E+02
 -1.4161976E+02 -1.4128781E+02 -1.4095613E+02 -1.4062473E+02
 -1.4029361E+02 -1.3996277E+02 -1.3963223E+02 -1.3930196E+02
 -1.3897199E+02 -1.3864232E+02 -1.3831295E+02 -1.3798389E+02
 -1.3765513E+02 -1.3732668E+02 -1.3699855E+02 -1.3667074E+02
 -1.3634324E+02 -1.3601608E+02 -1.3568924E+02 -1.3536273E+02
 -1.3503656E+02 -1.3471073E+02 -1.3438525E+02 -1.3406011E+02
 -1.3373532E+02 -1.3341089E+02 -1.3308680E+02 -1.3276309E+02
 -1.3243974E+02 -1.3211675E+02 -1.3179414E+02 -1.3147190E+02
 -1.3115005E+02 -1.3082858E+02 -1.3050749E+02 -1.3018679E+02
 -1.2986648E+02 -1.2954657E+02 -1.2922706E+02 -1.2890795E+02
 -1.2858926E+02 -1.2827097E+02 -1.2795310E+02 -1.2763564E+02
 -1.2731861E+02 -1.2700200E+02 -1.2668582E+02 -1.2637007E+02
 -1.2605477E+02 -1.2573989E+02 -1.2542546E+02 -1.2511148E+02
 -1.2479795E+02 -1.2448487E+02 -1.2417226E+02 -1.2386010E+02
 -1.2354840E+02 -1.2323717E+02 -1.2292642E+02 -1.2261614E+02
 -1.2230634E+02 -1.2199702E+02 -1.2168818E+02 -1.2137984E+02
 -1.2107199E+02 -1.2076463E+02 -1.2045778E+02 -1.2015143E+02
 -1.1984558E+02 -1.1954025E+02 -1.1923544E+02 -1.1893113E+02
 -1.1862735E+02 -1.1832410E+02 -1.1802137E+02 -1.1771918E+02
 -1.1741752E+02 -1.1711640E+02 -1.1681583E+02 -1.1651580E+02
 -1.1621632E+02 -1.1591739E+02 -1.1561903E+02 -1.1532122E+02
 -1.1502397E+02 -1.1472729E+02 -1.1443119E+02 -1.1413566E+02
 -1.1384071E+02 -1.1354633E+02 -1.1325255E+02 -1.1295936E+02
 -1.1266676E+02 -1.1237475E+02 -1.1208335E+02 -1.1179254E+02
 -1.1150234E+02 -1.1121276E+02 -1.1092379E+02 -1.1063543E+02
 -1.1034770E+02 -1.1006060E+02 -1.0977411E+02 -1.0948826E+02
 -1.0920305E+02 -1.0891848E+02 -1.0863455E+02 -1.0835127E+02
 -1.0806863E+02 -1.0778666E+02 -1.0750533E+02 -1.0722467E+02
 -1.0694466E+02 -1.0666533E+02 -1.0638667E+02 -1.0610868E+02
 -1.0583138E+02 -1.0555475E+02 -1.0527881E+02 -1.0500356E+02
 -1.0472900E+02 -1.0445513E+02 -1.0418197E+02 -1.0390951E+02
 -1.0363775E+02 -1.0336671E+02 -1.0309638E+02 -1.0282676E+02
 -1.0255787E+02 -1.0228971E+02 -1.0202227E+02 -1.0175556E+02
 -1.0148959E+02 -1.0122436E+02 -1.0095986E+02 -1.0069612E+02
 -1.0043312E+02 -1.0017088E+02 -9.9909398E+01 -9.9648668E+01
 -9.9388710E+01 -9.9129510E+01 -9.8871090E+01 -9.8613443E+01
 -9.8359380E+01 -9.8103293E+01 -9.7847978E+01 -9.7593443E+01
 -9.7339680E+01 -9.7086683E+01 -9.6834458E+01 -9.6582990E+01
 -9.6332288E+01 -9.6082350E+01 -9.5833163E+01 -9.5584725E+01
 -9.5337045E+01 -9.5090115E+01 -9.4843928E+01 -9.4598483E+01
 -9.4353773E+01 -9.4109813E+01 -9.3866580E+01 -9.3624083E+01
 -9.3382320E+01 -9.3141278E+01 -9.2900963E+01 -9.2661375E+01
 -9.2422508E+01 -9.2184353E+01 -9.1946918E+01 -9.1710195E+01
 -9.1474185E+01 -9.1238880E+01 -9.1004288E+01 -9.0770393E+01
 -9.0537195E+01 -9.0304703E+01 -9.0072908E+01 -8.9841803E+01
 -8.9611388E+01 -8.9381663E+01 -8.9152628E+01 -8.8924275E+01
 -8.8696605E+01 -8.8469618E+01 -8.8243305E+01 -8.8017668E+01
 -8.7792698E+01 -8.7568403E+01 -8.7344775E+01 -8.7121815E+01
 -8.6899523E+01 -8.6677883E+01 -8.6456910E+01 -8.6236590E+01
 -8.6016930E+01 -8.5797915E+01 -8.5579553E+01 -8.5361843E+01
 -8.5144770E+01 -8.4928350E+01 -8.4712568E+01 -8.4497423E+01
 -8.4282915E+01 -8.4069045E+01 -8.3855813E+01 -8.3643203E+01
 -8.3431223E+01 -8.3219873E+01 -8.3009145E+01 -8.2799040E+01
 -8.2589558E+01 -8.2380690E+01 -8.2172438E+01 -8.1964800E+01
 -8.1757770E+01 -8.1551355E+01 -8.1345548E+01 -8.1140348E+01
 -8.0935748E+01 -8.0731755E+01 -8.0528355E+01 -8.0325555E+01
 -8.0123355E+01 -7.9921740E+01 -7.9720725E+01 -7.9520295E+01
 -7.9320450E+01 -7.9121198E+01 -7.8922523E+01 -7.8724433E+01
 -7.8526928E+01 -7.8329993E+01 -7.8133635E+01 -7.7937855E+01
 -7.7742645E+01 -7.7548005E+01 -7.7353928E+01 -7.7160420E+01
 -7.6967483E+01 -7.6775108E+01 -7.6583288E+01 -7.6392030E+01
 -7.6201328E+01 -7.6011180E+01 -7.5821588E+01 -7.5632543E+01
 -7.5444053E+01 -7.5256110E+01 -7.5068708E+01 -7.4881854E+01
 -7.4695543E+01 -7.4509772E+01 -7.4324539E+01 -7.4139844E+01
 -7.3955684E+01 -7.3772057E+01 -7.3588961E+01 -7.3406396E+01
 -7.3224360E+01 -7.3042850E+01 -7.2861863E+01 -7.2681401E+01
 -7.2501459E+01 -7.2322037E+01 -7.2143133E+01 -7.1964746E+01
 -7.1786872E+01 -7.1609511E+01 -7.1432661E+01 -7.1256320E+01
 -7.1080487E+01 -7.0905161E+01 -7.0730338E+01 -7.0556018E+01
 -7.0382199E+01 -7.0208879E+01 -7.0036058E+01 -6.9863732E+01
 -6.9691901E+01 -6.9520562E+01 -6.9349715E+01 -6.9179358E+01
 -6.9009488E+01 -6.8840105E+01 -6.8671208E+01 -6.8502793E+01
 -6.8334860E+01 -6.8167406E+01 -6.8000432E+01 -6.7833934E+01
 -6.7667912E+01 -6.7502363E+01 -6.7337288E+01 -6.7172682E+01
 -6.7008546E+01 -6.6844878E+01 -6.6681676E+01 -6.6518939E+01
 -6.6356664E+01 -6.6194852E+01 -6.6033500E+01 -6.5872606E+01
 -6.5712169E+01 -6.5552189E+01 -6.5392661E+01 -6.5233588E+01
 -6.5074965E+01 -6.4916792E+01 -6.4759068E+01 -6.4601790E+01
 -6.4444958E+01 -6.4288570E+01 -6.4132625E+01 -6.3977120E+01
 -6.3822056E+01 -6.3667429E+01 -6.3513240E+01 -6.3359486E+01
 -6.3206166E+01 -6.3053279E+01 -6.2900822E+01 -6.2748797E+01
 -6.2597199E+01 -6.2446028E+01 -6.2295284E+01 -6.2144963E+01
 -6.1995066E+01 -6.1845590E+01 -6.1696535E+01 -6.1547899E+01
 -6.1399680E+01 -6.1251877E+01 -6.1104490E+01 -6.0957515E+01
 -6.0810954E+01 -6.0664803E+01 -6.0519062E+01 -6.0373729E+01
 -6.0228803E+01 -6.0084283E+01 -5.9940167E+01 -5.9796455E+01
 -5.9653144E+01 -5.9510234E+01 -5.9367722E+01 -5.9225609E+01
 -5.9083893E+01 -5.8942572E+01 -5.8801646E+01 -5.8661112E+01
 -5.8520970E+01 -5.8381219E+01 -5.8241856E+01 -5.8102882E+01
 -5.7964295E+01 -5.7826092E+01 -5.7688274E+01 -5.7550840E+01
 -5.7413787E+01 -5.7277115E+01 -5.7140822E+01 -5.7004907E+01
 -5.6869370E+01 -5.6734208E+01 -5.6599421E+01 -5.6465006E+01
 -5.6330965E+01 -5.6197295E+01 -5.6063994E+01 -5.5931063E+01
 -5.5798498E+01 -5.5666301E+01 -5.5534468E+01 -5.5403000E+01
 -5.5271894E+01 -5.5141151E+01 -5.5010768E+01 -5.4880744E+01
 -5.4751079E+01 -5.4621771E+01 -5.4492820E+01 -5.4364223E+01
 -5.4235980E+01 -5.4108091E+01 -5.3980553E+01 -5.3853365E+01
 -5.3726527E+01 -5.3600037E+01 -5.3473895E+01 -5.3348099E+01
 -5.3222648E+01 -5.3097540E+01 -5.2972776E+01 -5.2848354E+01
 -5.2724273E+01 -5.2600531E+01 -5.2477128E+01 -5.2354063E+01
 -5.2231334E+01 -5.2108941E+01 -5.1986882E+01 -5.1865157E+01
 -5.1743764E+01 -5.1622702E+01 -5.1501971E+01 -5.1381569E+01
 -5.1261495E+01 -5.1141749E+01 -5.1022328E+01 -5.0903234E+01
 -5.0784463E+01 -5.0666015E+01 -5.0547890E+01 -5.0430085E+01
 -5.0312601E+01 -5.0195436E+01 -5.0078589E+01 -4.9962059E+01
 -4.9845846E+01 -4.9729949E+01 -4.9614365E+01 -4.9499094E+01
 -4.9384136E+01 -4.9269489E+01 -4.9155152E+01 -4.9041125E+01
 -4.8927407E+01 -4.8813996E+01 -4.8700892E+01 -4.8588093E+01
 -4.8475599E+01 -4.8363409E+01 -4.8251521E+01 -4.8139935E+01
 -4.8028651E+01 -4.7917666E+01 -4.7806980E+01 -4.7696593E+01
 -4.7586503E+01 -4.7476709E+01 -4.7367210E+01 -4.7258006E+01
 -4.7149097E+01 -4.7040479E+01 -4.6932153E+01 -4.6824118E+01
 -4.6716374E+01 -4.6608917E+01 -4.6501750E+01 -4.6394870E+01
 -4.6288277E+01 -4.6181969E+01 -4.6075946E+01 -4.5970206E+01
 -4.5864749E+01 -4.5759575E+01 -4.5654683E+01 -4.5550070E+01
 -4.5445737E+01 -4.5341683E+01 -4.5237906E+01 -4.5134407E+01
 -4.5031184E+01 -4.4928236E+01 -4.4825562E+01 -4.4723162E+01
 -4.4621035E+01 -4.4519180E+01 -4.4417596E+01 -4.4316282E+01
 -4.4215238E+01 -4.4114463E+01 -4.4013956E+01 -4.3913715E+01
 -4.3813741E+01 -4.3714031E+01 -4.3614587E+01 -4.3515407E+01
 -4.3416490E+01 -4.3317835E+01 -4.3219441E+01 -4.3121308E+01
 -4.3023435E+01 -4.2925820E+01 -4.2828465E+01 -4.2731366E+01
 -4.2634525E+01 -4.2537939E+01 -4.2441609E+01 -4.2345533E+01
 -4.2249710E+01 -4.2154141E+01 -4.2058823E+01 -4.1963757E+01
 -4.1868942E+01 -4.1774376E+01 -4.1680060E+01 -4.1585992E+01
 -4.1492171E+01 -4.1398598E+01 -4.1305270E+01 -4.1212187E+01
 -4.1119350E+01 -4.1026756E+01 -4.0934405E+01 -4.0842297E+01
 -4.0750431E+01 -4.0658806E+01 -4.0567421E+01 -4.0476275E+01
 -4.0385368E+01 -4.0294699E+01 -4.0204268E+01 -4.0114073E+01
 -4.0024115E+01 -3.9934391E+01 -3.9844902E+01 -3.9755648E+01
 -3.9666626E+01 -3.9577837E+01 -3.9489279E+01 -3.9400952E+01
 -3.9312857E+01 -3.9224990E+01 -3.9137353E+01 -3.9049944E+01
 -3.8962763E+01 -3.8875808E+01 -3.8789081E+01 -3.8702579E+01
 -3.8616301E+01 -3.8530248E+01 -3.8444419E+01 -3.8358812E+01
 -3.8273429E+01 -3.8188266E+01 -3.8103325E+01 -3.8018603E+01
 -3.7934102E+01 -3.7849820E+01 -3.7765756E+01 -3.7681910E+01
 -3.7598280E+01 -3.7514867E+01 -3.7431671E+01 -3.7348689E+01
 -3.7265922E+01 -3.7183369E+01 -3.7101029E+01 -3.7018901E+01
 -3.6936986E+01 -3.6855282E+01 -3.6773789E+01 -3.6692506E+01
 -3.6611432E+01 -3.6530568E+01 -3.6449912E+01 -3.6369464E+01
 -3.6289222E+01 -3.6209187E+01 -3.6129358E+01 -3.6049734E+01
 -3.5970314E+01 -3.5891099E+01 -3.5812088E+01 -3.5733278E+01
 -3.5654672E+01 -3.5576267E+01 -3.5498063E+01 -3.5420060E+01
 -3.5342256E+01 -3.5264652E+01 -3.5187247E+01 -3.5110040E+01
 -3.5033030E+01 -3.4956217E+01 -3.4879601E+01 -3.4803180E+01
 -3.4726955E+01 -3.4650924E+01 -3.4575088E+01 -3.4499445E+01
 -3.4423995E+01 -3.4348738E+01 -3.4273673E+01 -3.4198798E+01
 -3.4124115E+01 -3.4049621E+01 -3.3975318E+01 -3.3901204E+01
 -3.3827278E+01 -3.3753539E+01 -3.3679989E+01 -3.3606626E+01
 -3.3533449E+01 -3.3460457E+01 -3.3387651E+01 -3.3315030E+01
 -3.3242593E+01 -3.3170339E+01 -3.3098269E+01 -3.3026381E+01
 -3.2954676E+01 -3.2883152E+01 -3.2811809E+01 -3.2740647E+01
 -3.2669664E+01 -3.2598861E+01 -3.2528237E+01 -3.2457792E+01
 -3.2387525E+01 -3.2317434E+01 -3.2247521E+01 -3.2177784E+01
 -3.2108223E+01 -3.2038838E+01 -3.1969626E+01 -3.1900590E+01
 -3.1831727E+01 -3.1763039E+01 -3.1694522E+01 -3.1626178E+01
 -3.1558006E+01 -3.1490005E+01 -3.1422176E+01 -3.1354516E+01
 -3.1287026E+01 -3.1219706E+01 -3.1152555E+01 -3.1085573E+01
 -3.1018758E+01 -3.0952111E+01 -3.0885630E+01 -3.0819317E+01
 -3.0753169E+01 -3.0687187E+01 -3.0621370E+01 -3.0555717E+01
 -3.0490229E+01 -3.0424904E+01 -3.0359744E+01 -3.0294745E+01
 -3.0229909E+01 -3.0165234E+01 -3.0100721E+01 -3.0036369E+01
 -2.9972177E+01 -2.9908145E+01 -2.9844273E+01 -2.9780561E+01
 -2.9717006E+01 -2.9653610E+01 -2.9590371E+01 -2.9527290E+01
 -2.9464366E+01 -2.9401598E+01 -2.9338985E+01 -2.9276529E+01
 -2.9214227E+01 -2.9152080E+01 -2.9090088E+01 -2.9028249E+01
 -2.8966563E+01 -2.8905030E+01 -2.8843650E+01 -2.8782422E+01
 -2.8721345E+01 -2.8660419E+01 -2.8599644E+01 -2.8539020E+01
 -2.8478546E+01 -2.8418220E+01 -2.8358044E+01 -2.8298016E+01
 -2.8238137E+01 -2.8178405E+01 -2.8118821E+01 -2.8059383E+01
 -2.8000093E+01 -2.7940948E+01 -2.7881949E+01 -2.7823096E+01
 -2.7764387E+01 -2.7705822E+01 -2.7647402E+01 -2.7589125E+01
 -2.7530992E+01 -2.7473002E+01 -2.7415154E+01 -2.7357448E+01
 -2.7299883E+01 -2.7242460E+01 -2.7185178E+01 -2.7128036E+01
 -2.7071035E+01 -2.7014173E+01 -2.6957450E+01 -2.6900867E+01
 -2.6844421E+01 -2.6788114E+01 -2.6731945E+01 -2.6675913E+01
 -2.6620018E+01 -2.6564259E+01 -2.6508637E+01 -2.6453150E+01
 -2.6397800E+01 -2.6342584E+01 -2.6287502E+01 -2.6232556E+01
 -2.6177743E+01 -2.6123063E+01 -2.6068517E+01 -2.6014104E+01
 -2.5959824E+01 -2.5905674E+01 -2.5851657E+01 -2.5797772E+01
 -2.5744017E+01 -2.5690393E+01 -2.5636899E+01 -2.5583535E+01
 -2.5530301E+01 -2.5477196E+01 -2.5424219E+01 -2.5371372E+01
 -2.5318652E+01 -2.5266060E+01 -2.5213595E+01 -2.5161258E+01
 -2.5109048E+01 -2.5056963E+01 -2.5005005E+01 -2.4953171E+01
 -2.4901464E+01 -2.4849882E+01 -2.4798424E+01 -2.4747090E+01
 -2.4695881E+01 -2.4644795E+01 -2.4593831E+01 -2.4542992E+01
 -2.4492275E+01 -2.4441679E+01 -2.4391206E+01 -2.4340854E+01
 -2.4290624E+01 -2.4240514E+01 -2.4190525E+01 -2.4140657E+01
 -2.4090908E+01 -2.4041278E+01 -2.3991768E+01 -2.3942377E+01
 -2.3893104E+01 -2.3843950E+01 -2.3794913E+01 -2.3745995E+01
 -2.3697194E+01 -2.3648509E+01 -2.3599941E+01 -2.3551490E+01
 -2.3503154E+01 -2.3454934E+01 -2.3406830E+01 -2.3358840E+01
 -2.3310965E+01 -2.3263205E+01 -2.3215559E+01 -2.3168027E+01
 -2.3120609E+01 -2.3073303E+01 -2.3026110E+01 -2.2979030E+01
 -2.2932062E+01 -2.2885206E+01 -2.2838462E+01 -2.2791829E+01
 -2.2745307E+01 -2.2698896E+01 -2.2652596E+01 -2.2606405E+01
 -2.2560324E+01 -2.2514354E+01 -2.2468491E+01 -2.2422739E+01
 -2.2377095E+01 -2.2331558E+01 -2.2286131E+01 -2.2240811E+01
 -2.2195598E+01 -2.2150493E+01 -2.2105494E+01 -2.2060602E+01
 -2.2015817E+01 -2.1971138E+01 -2.1926564E+01 -2.1882095E+01
 -2.1837732E+01 -2.1793474E+01 -2.1749321E+01 -2.1705272E+01
 -2.1661326E+01 -2.1617485E+01 -2.1573747E+01 -2.1530112E+01
 -2.1486581E+01 -2.1443151E+01 -2.1399824E+01 -2.1356600E+01
 -2.1313477E+01 -2.1270455E+01 -2.1227536E+01 -2.1184717E+01
 -2.1141998E+01 -2.1099380E+01 -2.1056863E+01 -2.1014445E+01
 -2.0972127E+01 -2.0929908E+01 -2.0887789E+01 -2.0845768E+01
 -2.0803846E+01 -2.0762022E+01 -2.0720297E+01 -2.0678669E+01
 -2.0637138E+01 -2.0595705E+01 -2.0554369E+01 -2.0513130E+01
 -2.0471987E+01 -2.0430941E+01 -2.0389990E+01 -2.0349135E+01
 -2.0308376E+01 -2.0267711E+01 -2.0227142E+01 -2.0186668E+01
 -2.0146288E+01 -2.0106002E+01 -2.0065810E+01 -2.0025712E+01
 -1.9985707E+01 -1.9945796E+01 -1.9905977E+01 -1.9866251E+01
 -1.9826618E+01 -1.9787076E+01 -1.9747627E+01 -1.9708270E+01
 -1.9669004E+01 -1.9629829E+01 -1.9590745E+01 -1.9551752E+01
 -1.9512850E+01 -1.9474037E+01 -1.9435315E+01 -1.9396683E+01
 -1.9358140E+01 -1.9319687E+01 -1.9281322E+01 -1.9243046E+01
 -1.9204859E+01 -1.9166761E+01 -1.9128751E+01 -1.9090828E+01
 -1.9052993E+01 -1.9015246E+01 -1.8977585E+01 -1.8940013E+01
 -1.8902526E+01 -1.8865127E+01 -1.8827813E+01 -1.8790585E+01
 -1.8753443E+01 -1.8716387E+01 -1.8679417E+01 -1.8642531E+01
 -1.8605731E+01 -1.8569015E+01 -1.8532384E+01 -1.8495837E+01
 -1.8459374E+01 -1.8422995E+01 -1.8386699E+01 -1.8350487E+01
 -1.8314358E+01 -1.8278312E+01 -1.8242349E+01 -1.8206468E+01
 -1.8170670E+01 -1.8134954E+01 -1.8099320E+01 -1.8063767E+01
 -1.8028295E+01 -1.7992905E+01 -1.7957596E+01 -1.7922368E+01
 -1.7887220E+01 -1.7852153E+01 -1.7817166E+01 -1.7782259E+01
 -1.7747432E+01 -1.7712684E+01 -1.7678015E+01 -1.7643426E+01
 -1.7608916E+01 -1.7574484E+01 -1.7540131E+01 -1.7505856E+01
 -1.7471660E+01 -1.7437541E+01 -1.7403500E+01 -1.7369536E+01
 -1.7335650E+01 -1.7301841E+01 -1.7268108E+01 -1.7234453E+01
 -1.7200874E+01 -1.7167371E+01 -1.7133944E+01 -1.7100593E+01
 -1.7067319E+01 -1.7034119E+01 -1.7000995E+01 -1.6967946E+01
 -1.6934972E+01 -1.6902072E+01 -1.6869248E+01 -1.6836497E+01
 -1.6803821E+01 -1.6771218E+01 -1.6738690E+01 -1.6706234E+01
 -1.6673853E+01 -1.6641545E+01 -1.6609309E+01 -1.6577147E+01
 -1.6545056E+01 -1.6513039E+01 -1.6481094E+01 -1.6449221E+01
 -1.6417419E+01 -1.6385690E+01 -1.6354031E+01 -1.6322445E+01
 -1.6290929E+01 -1.6259485E+01 -1.6228111E+01 -1.6196808E+01
 -1.6165575E+01 -1.6134413E+01 -1.6103320E+01 -1.6072298E+01
 -1.6041344E+01 -1.6010461E+01 -1.5979647E+01 -1.5948902E+01
 -1.5918227E+01 -1.5887619E+01 -1.5857081E+01 -1.5826611E+01
 -1.5796209E+01 -1.5765875E+01 -1.5735610E+01 -1.5705412E+01
 -1.5675282E+01 -1.5645219E+01 -1.5615224E+01 -1.5585295E+01
 -1.5555433E+01 -1.5525638E+01 -1.5495910E+01 -1.5466248E+01
 -1.5436652E+01 -1.5407123E+01 -1.5377659E+01 -1.5348260E+01
 -1.5318928E+01 -1.5289661E+01 -1.5260459E+01 -1.5231322E+01
 -1.5202250E+01 -1.5173243E+01 -1.5144300E+01 -1.5115421E+01
 -1.5086607E+01 -1.5057857E+01 -1.5029171E+01 -1.5000548E+01
 -1.4971990E+01 -1.4943494E+01 -1.4915062E+01 -1.4886693E+01
 -1.4858387E+01 -1.4830144E+01 -1.4801963E+01 -1.4773844E+01
 -1.4745788E+01 -1.4717795E+01 -1.4689862E+01 -1.4661992E+01
 -1.4634184E+01 -1.4606437E+01 -1.4578751E+01 -1.4551127E+01
 -1.4523564E+01 -1.4496062E+01 -1.4468620E+01 -1.4441239E+01
 -1.4413918E+01 -1.4386658E+01 -1.4359457E+01 -1.4332317E+01
 -1.4305237E+01 -1.4278216E+01 -1.4251255E+01 -1.4224353E+01
 -1.4197511E+01 -1.4170727E+01 -1.4144003E+01 -1.4117336E+01
 -1.4090729E+01 -1.4064181E+01 -1.4037690E+01 -1.4011258E+01
 -1.3984884E+01 -1.3958568E+01 -1.3932309E+01 -1.3906109E+01
 -1.3879965E+01 -1.3853879E+01 -1.3827850E+01 -1.3801878E+01
 -1.3775963E+01 -1.3750105E+01 -1.3724303E+01 -1.3698558E+01
 -1.3672870E+01 -1.3647237E+01 -1.3621661E+01 -1.3596140E+01
 -1.3570675E+01 -1.3545266E+01 -1.3519912E+01 -1.3494614E+01
 -1.3469370E+01 -1.3444182E+01 -1.3419049E+01 -1.3393970E+01
 -1.3368947E+01 -1.3343978E+01 -1.3319063E+01 -1.3294202E+01
 -1.3269395E+01 -1.3244643E+01 -1.3219944E+01 -1.3195299E+01
 -1.3170708E+01 -1.3146170E+01 -1.3121686E+01 -1.3097255E+01
 -1.3072876E+01 -1.3048550E+01 -1.3024278E+01 -1.3000058E+01
 -1.2975890E+01 -1.2951776E+01 -1.2927713E+01 -1.2903702E+01
 -1.2879743E+01 -1.2855837E+01 -1.2831982E+01 -1.2808178E+01
 -1.2784427E+01 -1.2760727E+01 -1.2737077E+01 -1.2713479E+01
 -1.2689932E+01 -1.2666436E+01 -1.2642990E+01 -1.2619595E+01
 -1.2596251E+01 -1.2572957E+01 -1.2549713E+01 -1.2526520E+01
 -1.2503375E+01 -1.2480282E+01 -1.2457238E+01 -1.2434243E+01
 -1.2411299E+01 -1.2388403E+01 -1.2365557E+01 -1.2342760E+01
 -1.2320012E+01 -1.2297312E+01 -1.2274661E+01 -1.2252060E+01
 -1.2229507E+01 -1.2207002E+01 -1.2184545E+01 -1.2162137E+01
 -1.2139777E+01 -1.2117464E+01 -1.2095200E+01 -1.2072983E+01
 -1.2050814E+01 -1.2028692E+01 -1.2006617E+01 -1.1984591E+01
 -1.1962610E+01 -1.1940677E+01 -1.1918792E+01 -1.1896952E+01
 -1.1875160E+01 -1.1853413E+01 -1.1831714E+01 -1.1810060E+01
 -1.1788454E+01 -1.1766893E+01 -1.1745378E+01 -1.1723909E+01
 -1.1702486E+01 -1.1681108E+01 -1.1659775E+01 -1.1638489E+01
 -1.1617247E+01 -1.1596052E+01 -1.1574900E+01 -1.1553794E+01
 -1.1532734E+01 -1.1511717E+01 -1.1490745E+01 -1.1469818E+01
 -1.1448935E+01 -1.1428097E+01 -1.1407303E+01 -1.1386553E+01
 -1.1365847E+01 -1.1345185E+01 -1.1324567E+01 -1.1303992E+01
 -1.1283461E+01 -1.1262974E+01 -1.1242530E+01 -1.1222129E+01
 -1.1201771E+01 -1.1181457E+01 -1.1161185E+01 -1.1140957E+01
 -1.1120771E+01 -1.1100627E+01 -1.1080526E+01 -1.1060468E+01
 -1.1040452E+01 -1.1020479E+01 -1.1000547E+01 -1.0980658E+01
 -1.0960811E+01 -1.0941005E+01 -1.0921241E+01 -1.0901519E+01
 -1.0881838E+01 -1.0862198E+01 -1.0842600E+01 -1.0823043E+01
 -1.0803528E+01 -1.0784053E+01 -1.0764620E+01 -1.0745227E+01
 -1.0725875E+01 -1.0706564E+01 -1.0687292E+01 -1.0668062E+01
 -1.0648872E+01 -1.0629722E+01 -1.0610612E+01 -1.0591543E+01
 -1.0572514E+01 -1.0553524E+01 -1.0534574E+01 -1.0515664E+01
 -1.0496793E+01 -1.0477962E+01 -1.0459170E+01 -1.0440418E+01
 -1.0421705E+01 -1.0403030E+01 -1.0384395E+01 -1.0365800E+01
 -1.0347242E+01 -1.0328723E+01 -1.0310243E+01 -1.0291802E+01
 -1.0273400E+01 -1.0255035E+01 -1.0236709E+01 -1.0218421E+01
 -1.0200171E+01 -1.0181959E+01 -1.0163785E+01 -1.0145649E+01
 -1.0127550E+01 -1.0109489E+01 -1.0091467E+01 -1.0073481E+01
 -1.0055533E+01 -1.0037621E+01 -1.0019748E+01 -1.0001911E+01
 -9.9841118E+00 -9.9663488E+00 -9.9486233E+00 -9.9309338E+00
 -9.9132818E+00 -9.8956658E+00 -9.8780865E+00 -9.8605433E+00
 -9.8430368E+00 -9.8255670E+00 -9.8081325E+00 -9.7907348E+00
 -9.7733730E+00 -9.7560465E+00 -9.7387560E+00 -9.7215015E+00
 -9.7042830E+00 -9.6870998E+00 -9.6699518E+00 -9.6528390E+00
 -9.6357623E+00 -9.6187200E+00 -9.6017138E+00 -9.5847420E+00
 -9.5678055E+00 -9.5509035E+00 -9.5340368E+00 -9.5172045E+00
 -9.5004068E+00 -9.4836443E+00 -9.4669155E+00 -9.4502213E+00
 -9.4335615E+00 -9.4169363E+00 -9.4003448E+00 -9.3837878E+00
 -9.3672645E+00 -9.3507750E+00 -9.3343200E+00 -9.3178980E+00
 -9.3015105E+00 -9.2851560E+00 -9.2688353E+00 -9.2525483E+00
 -9.2362943E+00 -9.2200733E+00 -9.2038860E+00 -9.1877318E+00
 -9.1716105E+00 -9.1555223E+00 -9.1394670E+00 -9.1234448E+00
 -9.1074548E+00 -9.0914985E+00 -9.0755738E+00 -9.0596820E+00
 -9.0438225E+00 -9.0279953E+00 -9.0122010E+00 -8.9964383E+00
 -8.9807078E+00 -8.9650095E+00 -8.9493435E+00 -8.9337090E+00
 -8.9181068E+00 -8.9025360E+00 -8.8869968E+00 -8.8714898E+00
 -8.8560143E+00 -8.8405695E+00 -8.8251570E+00 -8.8097753E+00
 -8.7944250E+00 -8.7791063E+00 -8.7638183E+00 -8.7485610E+00
 -8.7333353E+00 -8.7181403E+00 -8.7029760E+00 -8.6878425E+00
 -8.6727398E+00 -8.6576678E+00 -8.6426265E+00 -8.6276153E+00
 -8.6126348E+00 -8.5976843E+00 -8.5827638E+00 -8.5678740E+00
 -8.5530143E+00 -8.5381845E+00 -8.5233855E+00 -8.5086158E+00
 -8.4938753E+00 -8.4791655E+00 -8.4644850E+00 -8.4498345E+00
 -8.4352133E+00 -8.4206213E+00 -8.4060593E+00 -8.3915265E+00
 -8.3770223E+00 -8.3625480E+00 -8.3481030E+00 -8.3336873E+00
 -8.3193000E+00 -8.3049420E+00 -8.2906125E+00 -8.2763123E+00
 -8.2620413E+00 -8.2477980E+00 -8.2335840E+00 -8.2193985E+00
 -8.2052408E+00 -8.1911123E+00 -8.1770123E+00 -8.1629400E+00
 -8.1488963E+00 -8.1348810E+00 -8.1208935E+00 -8.1069338E+00
 -8.0930025E+00 -8.0790990E+00 -8.0652233E+00 -8.0513753E+00
 -8.0375550E+00 -8.0237625E+00 -8.0099978E+00 -7.9962608E+00
 -7.9825508E+00 -7.9688685E+00 -7.9552133E+00 -7.9415858E+00
 -7.9279853E+00 -7.9144118E+00 -7.9008653E+00 -7.8873465E+00
 -7.8738540E+00 -7.8603885E+00 -7.8469500E+00 -7.8335385E+00
 -7.8201533E+00 -7.8067950E+00 -7.7934638E+00 -7.7801588E+00
 -7.7668800E+00 -7.7536275E+00 -7.7404020E+00 -7.7272028E+00
 -7.7140290E+00 -7.7008823E+00 -7.6877610E+00 -7.6746660E+00
 -7.6615973E+00 -7.6485548E+00 -7.6355378E+00 -7.6225463E+00
 -7.6095810E+00 -7.5966413E+00 -7.5837278E+00 -7.5708390E+00
 -7.5579765E+00 -7.5451395E+00 -7.5323273E+00 -7.5195405E+00
 -7.5067793E+00 -7.4940436E+00 -7.4813328E+00 -7.4686472E+00
 -7.4559867E+00 -7.4433512E+00 -7.4307407E+00 -7.4181551E+00
 -7.4055944E+00 -7.3930586E+00 -7.3805474E+00 -7.3680609E+00
 -7.3555991E+00 -7.3431618E+00 -7.3307491E+00 -7.3183608E+00
 -7.3059970E+00 -7.2936575E+00 -7.2813424E+00 -7.2690515E+00
 -7.2567848E+00 -7.2445421E+00 -7.2323237E+00 -7.2201293E+00
 -7.2079588E+00 -7.1958122E+00 -7.1836896E+00 -7.1715908E+00
 -7.1595157E+00 -7.1474643E+00 -7.1354366E+00 -7.1234325E+00
 -7.1114519E+00 -7.0994949E+00 -7.0875614E+00 -7.0756511E+00
 -7.0637643E+00 -7.0519007E+00 -7.0400604E+00 -7.0282433E+00
 -7.0164493E+00 -7.0046783E+00 -6.9929305E+00 -6.9812055E+00
 -6.9695036E+00 -6.9578245E+00 -6.9461682E+00 -6.9345347E+00
 -6.9229239E+00 -6.9113358E+00 -6.8997704E+00 -6.8882275E+00
 -6.8767071E+00 -6.8652092E+00 -6.8537337E+00 -6.8422806E+00
 -6.8308498E+00 -6.8194413E+00 -6.8080550E+00 -6.7966909E+00
 -6.7853489E+00 -6.7740290E+00 -6.7627310E+00 -6.7514552E+00
 -6.7402012E+00 -6.7289690E+00 -6.7177588E+00 -6.7065703E+00
 -6.6954035E+00 -6.6842585E+00 -6.6731351E+00 -6.6620332E+00
 -6.6509529E+00 -6.6398941E+00 -6.6288567E+00 -6.6178408E+00
 -6.6068462E+00 -6.5958728E+00 -6.5849208E+00 -6.5739899E+00
 -6.5630803E+00 -6.5521917E+00 -6.5413242E+00 -6.5304778E+00
 -6.5196523E+00 -6.5088477E+00 -6.4980641E+00 -6.4873012E+00
 -6.4765592E+00 -6.4658378E+00 -6.4551373E+00 -6.4444573E+00
 -6.4337980E+00 -6.4231592E+00 -6.4125410E+00 -6.4019432E+00
 -6.3913658E+00 -6.3808088E+00 -6.3702722E+00 -6.3597559E+00
 -6.3492598E+00 -6.3387839E+00 -6.3283282E+00 -6.3178926E+00
 -6.3074771E+00 -6.2970815E+00 -6.2867060E+00 -6.2763504E+00
 -6.2660147E+00 -6.2556989E+00 -6.2454029E+00 -6.2351266E+00
 -6.2248700E+00 -6.2146332E+00 -6.2044160E+00 -6.1942183E+00
 -6.1840402E+00 -6.1738817E+00 -6.1637425E+00 -6.1536228E+00
 -6.1435225E+00 -6.1334415E+00 -6.1233798E+00 -6.1133374E+00
 -6.1033142E+00 -6.0933101E+00 -6.0833252E+00 -6.0733593E+00
 -6.0634124E+00 -6.0534847E+00 -6.0435758E+00 -6.0336859E+00
 -6.0238148E+00 -6.0139626E+00 -6.0041291E+00 -5.9943145E+00
 -5.9845185E+00 -5.9747412E+00 -5.9649826E+00 -5.9552425E+00
 -5.9455210E+00 -5.9358179E+00 -5.9261334E+00 -5.9164673E+00
 -5.9068196E+00 -5.8971902E+00 -5.8875791E+00 -5.8779863E+00
 -5.8684118E+00 -5.8588554E+00 -5.8493172E+00 -5.8397971E+00
 -5.8302950E+00 -5.8208111E+00 -5.8113450E+00 -5.8018970E+00
 -5.7924668E+00 -5.7830546E+00 -5.7736601E+00 -5.7642835E+00
 -5.7549246E+00 -5.7455835E+00 -5.7362600E+00 -5.7269542E+00
 -5.7176660E+00 -5.7083954E+00 -5.6991422E+00 -5.6899067E+00
 -5.6806885E+00 -5.6714878E+00 -5.6623044E+00 -5.6531384E+00
 -5.6439897E+00 -5.6348582E+00 -5.6257441E+00 -5.6166470E+00
 -5.6075672E+00 -5.5985045E+00 -5.5894588E+00 -5.5804302E+00
 -5.5714186E+00 -5.5624240E+00 -5.5534463E+00 -5.5444856E+00
 -5.5355416E+00 -5.5266145E+00 -5.5177042E+00 -5.5088107E+00
 -5.4999338E+00 -5.4910737E+00 -5.4822302E+00 -5.4734033E+00
 -5.4645930E+00 -5.4557993E+00 -5.4470220E+00 -5.4382612E+00
 -5.4295169E+00 -5.4207889E+00 -5.4120773E+00 -5.4033821E+00
 -5.3947031E+00 -5.3860403E+00 -5.3773939E+00 -5.3687636E+00
 -5.3601494E+00 -5.3515514E+00 -5.3429695E+00 -5.3344036E+00
 -5.3258537E+00 -5.3173199E+00 -5.3088020E+00 -5.3003000E+00
 -5.2918138E+00 -5.2833435E+00 -5.2748891E+00 -5.2664504E+00
 -5.2580274E+00 -5.2496201E+00 -5.2412286E+00 -5.2328527E+00
 -5.2244924E+00 -5.2161476E+00 -5.2078185E+00 -5.1995048E+00
 -5.1912066E+00 -5.1829239E+00 -5.1746566E+00 -5.1664046E+00
 -5.1581681E+00 -5.1499468E+00 -5.1417407E+00 -5.1335500E+00
 -5.1253745E+00 -5.1172142E+00 -5.1090689E+00 -5.1009389E+00
 -5.0928239E+00 -5.0847240E+00 -5.0766391E+00 -5.0685692E+00
 -5.0605143E+00 -5.0524743E+00 -5.0444492E+00 -5.0364389E+00
 -5.0284436E+00 -5.0204630E+00 -5.0124971E+00 -5.0045460E+00
 -4.9966097E+00 -4.9886879E+00 -4.9807809E+00 -4.9728885E+00
 -4.9650107E+00 -4.9571474E+00 -4.9492986E+00 -4.9414643E+00
 -4.9336445E+00 -4.9258391E+00 -4.9180482E+00 -4.9102716E+00
 -4.9025093E+00 -4.8947614E+00 -4.8870278E+00 -4.8793083E+00
 -4.8716032E+00 -4.8639122E+00 -4.8562353E+00 -4.8485726E+00
 -4.8409241E+00 -4.8332895E+00 -4.8256691E+00 -4.8180626E+00
 -4.8104701E+00 -4.8028916E+00 -4.7953270E+00 -4.7877763E+00
 -4.7802395E+00 -4.7727164E+00 -4.7652072E+00 -4.7577119E+00
 -4.7502302E+00 -4.7427623E+00 -4.7353080E+00 -4.7278674E+00
 -4.7204405E+00 -4.7130272E+00 -4.7056274E+00 -4.6982412E+00
 -4.6908685E+00 -4.6835093E+00 -4.6761636E+00 -4.6688313E+00
 -4.6615124E+00 -4.6542070E+00 -4.6469148E+00 -4.6396360E+00
 -4.6323705E+00 -4.6251182E+00 -4.6178792E+00 -4.6106535E+00
 -4.6034409E+00 -4.5962414E+00 -4.5890552E+00 -4.5818819E+00
 -4.5747218E+00 -4.5675748E+00 -4.5604407E+00 -4.5533197E+00
 -4.5462116E+00 -4.5391164E+00 -4.5320342E+00 -4.5249649E+00
 -4.5179084E+00 -4.5108647E+00 -4.5038339E+00 -4.4968159E+00
 -4.4898106E+00 -4.4828180E+00 -4.4758382E+00 -4.4688710E+00
 -4.4619164E+00 -4.4549745E+00 -4.4480452E+00 -4.4411285E+00
 -4.4342243E+00 -4.4273326E+00 -4.4204534E+00 -4.4135867E+00
 -4.4067324E+00 -4.3998905E+00 -4.3930610E+00 -4.3862439E+00
 -4.3794392E+00 -4.3726467E+00 -4.3658665E+00 -4.3590986E+00
 -4.3523429E+00 -4.3455995E+00 -4.3388682E+00 -4.3321491E+00
 -4.3254421E+00 -4.3187472E+00 -4.3120645E+00 -4.3053938E+00
 -4.2987350E+00 -4.2920884E+00 -4.2854537E+00 -4.2788310E+00
 -4.2722202E+00 -4.2656213E+00 -4.2590344E+00 -4.2524592E+00
 -4.2458960E+00 -4.2393445E+00 -4.2328048E+00 -4.2262769E+00
 -4.2197607E+00 -4.2132563E+00 -4.2067635E+00 -4.2002825E+00
 -4.1938130E+00 -4.1873552E+00 -4.1809090E+00 -4.1744744E+00
 -4.1680513E+00 -4.1616397E+00 -4.1552396E+00 -4.1488511E+00
 -4.1424740E+00 -4.1361083E+00 -4.1297540E+00 -4.1234111E+00
 -4.1170796E+00 -4.1107593E+00 -4.1044505E+00 -4.0981529E+00
 -4.0918666E+00 -4.0855915E+00 -4.0793276E+00 -4.0730750E+00
 -4.0668335E+00 -4.0606033E+00 -4.0543841E+00 -4.0481760E+00
 -4.0419791E+00 -4.0357931E+00 -4.0296182E+00 -4.0234544E+00
 -4.0173016E+00 -4.0111597E+00 -4.0050287E+00 -3.9989087E+00
 -3.9927997E+00 -3.9867014E+00 -3.9806141E+00 -3.9745376E+00
 -3.9684719E+00 -3.9624170E+00 -3.9563729E+00 -3.9503396E+00
 -3.9443170E+00 -3.9383051E+00 -3.9323039E+00 -3.9263132E+00
 -3.9203333E+00 -3.9143641E+00 -3.9084053E+00 -3.9024572E+00
 -3.8965197E+00 -3.8905927E+00 -3.8846762E+00 -3.8787702E+00
 -3.8728747E+00 -3.8669896E+00 -3.8611149E+00 -3.8552507E+00
 -3.8493968E+00 -3.8435534E+00 -3.8377202E+00 -3.8318974E+00
 -3.8260849E+00 -3.8202827E+00 -3.8144907E+00 -3.8087090E+00
 -3.8029375E+00 -3.7971762E+00 -3.7914251E+00 -3.7856841E+00
 -3.7799533E+00 -3.7742326E+00 -3.7685220E+00 -3.7628215E+00
 -3.7571310E+00 -3.7514506E+00 -3.7457801E+00 -3.7401197E+00
 -3.7344693E+00 -3.7288288E+00 -3.7231982E+00 -3.7175777E+00
 -3.7119669E+00 -3.7063661E+00 -3.7007750E+00 -3.6951939E+00
 -3.6896225E+00 -3.6840610E+00 -3.6785093E+00 -3.6729672E+00
 -3.6674350E+00 -3.6619124E+00 -3.6563996E+00 -3.6508964E+00
 -3.6454029E+00 -3.6399190E+00 -3.6344447E+00 -3.6289801E+00
 -3.6235250E+00 -3.6180796E+00 -3.6126436E+00 -3.6072172E+00
 -3.6018002E+00 -3.5963928E+00 -3.5909948E+00 -3.5856064E+00
 -3.5802273E+00 -3.5748576E+00 -3.5694974E+00 -3.5641464E+00
 -3.5588049E+00 -3.5534727E+00 -3.5481498E+00 -3.5428362E+00
 -3.5375319E+00 -3.5322368E+00 -3.5269511E+00 -3.5216744E+00
 -3.5164071E+00 -3.5111489E+00 -3.5058999E+00 -3.5006600E+00
 -3.4954293E+00 -3.4902077E+00 -3.4849952E+00 -3.4797918E+00
 -3.4745975E+00 -3.4694121E+00 -3.4642358E+00 -3.4590686E+00
 -3.4539102E+00 -3.4487609E+00 -3.4436206E+00 -3.4384891E+00
 -3.4333666E+00 -3.4282530E+00 -3.4231483E+00 -3.4180524E+00
 -3.4129654E+00 -3.4078872E+00 -3.4028178E+00 -3.3977573E+00
 -3.3927054E+00 -3.3876624E+00 -3.3826281E+00 -3.3776025E+00
 -3.3725857E+00 -3.3675775E+00 -3.3625780E+00 -3.3575872E+00
 -3.3526049E+00 -3.3476314E+00 -3.3426664E+00 -3.3377100E+00
 -3.3327623E+00 -3.3278230E+00 -3.3228923E+00 -3.3179701E+00
 -3.3130564E+00 -3.3081512E+00 -3.3032544E+00 -3.2983661E+00
 -3.2934863E+00 -3.2886149E+00 -3.2837519E+00 -3.2788973E+00
 -3.2740510E+00 -3.2692131E+00 -3.2643836E+00 -3.2595623E+00
 -3.2547494E+00 -3.2499447E+00 -3.2451483E+00 -3.2403602E+00
 -3.2355803E+00 -3.2308087E+00 -3.2260452E+00 -3.2212900E+00
 -3.2165429E+00 -3.2118040E+00 -3.2070732E+00 -3.2023505E+00
 -3.1976360E+00 -3.1929296E+00 -3.1882312E+00 -3.1835409E+00
 -3.1788587E+00 -3.1741844E+00 -3.1695182E+00 -3.1648601E+00
 -3.1602098E+00 -3.1555676E+00 -3.1509333E+00 -3.1463069E+00
 -3.1416885E+00 -3.1370780E+00 -3.1324754E+00 -3.1278806E+00
 -3.1232937E+00 -3.1187147E+00 -3.1141434E+00 -3.1095800E+00
 -3.1050244E+00 -3.1004766E+00 -3.0959366E+00 -3.0914042E+00
 -3.0868797E+00 -3.0823628E+00 -3.0778538E+00 -3.0733523E+00
 -3.0688586E+00 -3.0643724E+00 -3.0598940E+00 -3.0554232E+00
 -3.0509600E+00 -3.0465044E+00 -3.0420565E+00 -3.0376160E+00
 -3.0331832E+00 -3.0287579E+00 -3.0243401E+00 -3.0199298E+00
 -3.0155270E+00 -3.0111318E+00 -3.0067440E+00 -3.0023636E+00
 -2.9979908E+00 -2.9936252E+00 -2.9892672E+00 -2.9849165E+00
 -2.9805733E+00 -2.9762373E+00 -2.9719088E+00 -2.9675876E+00
 -2.9632737E+00 -2.9589671E+00 -2.9546679E+00 -2.9503759E+00
 -2.9460912E+00 -2.9418137E+00 -2.9375435E+00 -2.9332806E+00
 -2.9290248E+00 -2.9247763E+00 -2.9205349E+00 -2.9163008E+00
 -2.9120737E+00 -2.9078538E+00 -2.9036411E+00 -2.8994354E+00
 -2.8952369E+00 -2.8910455E+00 -2.8868611E+00 -2.8826838E+00
 -2.8785135E+00 -2.8743503E+00 -2.8701941E+00 -2.8660450E+00
 -2.8619028E+00 -2.8577676E+00 -2.8536394E+00 -2.8495181E+00
 -2.8454038E+00 -2.8412963E+00 -2.8371959E+00 -2.8331023E+00
 -2.8290156E+00 -2.8249358E+00 -2.8208628E+00 -2.8167967E+00
 -2.8127375E+00 -2.8086850E+00 -2.8046393E+00 -2.8006005E+00
 -2.7965684E+00 -2.7925432E+00 -2.7885246E+00 -2.7845129E+00
 -2.7805078E+00 -2.7765095E+00 -2.7725178E+00 -2.7685329E+00
 -2.7645546E+00 -2.7605831E+00 -2.7566181E+00 -2.7526598E+00
 -2.7487082E+00 -2.7447632E+00 -2.7408247E+00 -2.7368929E+00
 -2.7329676E+00 -2.7290489E+00 -2.7251367E+00 -2.7212312E+00
 -2.7173321E+00 -2.7134395E+00 -2.7095534E+00 -2.7056739E+00
 -2.7018008E+00 -2.6979341E+00 -2.6940740E+00 -2.6902203E+00
 -2.6863730E+00 -2.6825321E+00 -2.6786976E+00 -2.6748695E+00
 -2.6710478E+00 -2.6672325E+00 -2.6634236E+00 -2.6596209E+00
 -2.6558246E+00 -2.6520347E+00 -2.6482510E+00 -2.6444736E+00
 -2.6407025E+00 -2.6369378E+00 -2.6331792E+00 -2.6294269E+00
 -2.6256809E+00 -2.6219410E+00 -2.6182073E+00 -2.6144799E+00
 -2.6107587E+00 -2.6070437E+00 -2.6033348E+00 -2.5996320E+00
 -2.5959354E+00 -2.5922450E+00 -2.5885606E+00 -2.5848824E+00
 -2.5812102E+00 -2.5775441E+00 -2.5738841E+00 -2.5702302E+00
 -2.5665824E+00 -2.5629405E+00 -2.5593047E+00 -2.5556750E+00
 -2.5520512E+00 -2.5484333E+00 -2.5448216E+00 -2.5412157E+00
 -2.5376159E+00 -2.5340219E+00 -2.5304339E+00 -2.5268519E+00
 -2.5232757E+00 -2.5197054E+00 -2.5161411E+00 -2.5125826E+00
 -2.5090300E+00 -2.5054832E+00 -2.5019423E+00 -2.4984073E+00
 -2.4948780E+00 -2.4913546E+00 -2.4878370E+00 -2.4843251E+00
 -2.4808191E+00 -2.4773189E+00 -2.4738243E+00 -2.4703355E+00
 -2.4668525E+00 -2.4633752E+00 -2.4599036E+00 -2.4564378E+00
 -2.4529776E+00 -2.4495231E+00 -2.4460743E+00 -2.4426311E+00
 -2.4391937E+00 -2.4357618E+00 -2.4323356E+00 -2.4289150E+00
 -2.4254999E+00 -2.4220906E+00 -2.4186868E+00 -2.4152885E+00
 -2.4118959E+00 -2.4085088E+00 -2.4051272E+00 -2.4017513E+00
 -2.3983808E+00 -2.3950158E+00 -2.3916563E+00 -2.3883023E+00
 -2.3849539E+00 -2.3816109E+00 -2.3782733E+00 -2.3749412E+00
 -2.3716146E+00 -2.3682935E+00 -2.3649776E+00 -2.3616673E+00
 -2.3583623E+00 -2.3550628E+00 -2.3517686E+00 -2.3484798E+00
 -2.3451964E+00 -2.3419183E+00 -2.3386455E+00 -2.3353781E+00
 -2.3321160E+00 -2.3288593E+00 -2.3256078E+00 -2.3223617E+00
 -2.3191208E+00 -2.3158852E+00 -2.3126548E+00 -2.3094297E+00
 -2.3062099E+00 -2.3029953E+00 -2.2997859E+00 -2.2965818E+00
 -2.2933828E+00 -2.2901891E+00 -2.2870005E+00 -2.2838171E+00
 -2.2806389E+00 -2.2774658E+00 -2.2742979E+00 -2.2711352E+00
 -2.2679775E+00 -2.2648250E+00 -2.2616776E+00 -2.2585352E+00
 -2.2553980E+00 -2.2522659E+00 -2.2491389E+00 -2.2460168E+00
 -2.2428999E+00 -2.2397880E+00 -2.2366811E+00 -2.2335793E+00
 -2.2304825E+00 -2.2273907E+00 -2.2243039E+00 -2.2212221E+00
 -2.2181452E+00 -2.2150733E+00 -2.2120064E+00 -2.2089445E+00
 -2.2058875E+00 -2.2028354E+00 -2.1997883E+00 -2.1967460E+00
 -2.1937087E+00 -2.1906763E+00 -2.1876487E+00 -2.1846260E+00
 -2.1816083E+00 -2.1785954E+00 -2.1755873E+00 -2.1725840E+00
 -2.1695857E+00 -2.1665921E+00 -2.1636034E+00 -2.1606194E+00
 -2.1576403E+00 -2.1546659E+00 -2.1516964E+00 -2.1487316E+00
 -2.1457715E+00 -2.1428163E+00 -2.1398657E+00 -2.1369200E+00
 -2.1339789E+00 -2.1310426E+00 -2.1281110E+00 -2.1251840E+00
 -2.1222619E+00 -2.1193443E+00 -2.1164315E+00 -2.1135233E+00
 -2.1106198E+00 -2.1077209E+00 -2.1048266E+00 -2.1019370E+00
 -2.0990521E+00 -2.0961718E+00 -2.0932960E+00 -2.0904249E+00
 -2.0875583E+00 -2.0846964E+00 -2.0818390E+00 -2.0789862E+00
 -2.0761379E+00 -2.0732942E+00 -2.0704551E+00 -2.0676205E+00
 -2.0647904E+00 -2.0619648E+00 -2.0591438E+00 -2.0563271E+00
 -2.0535151E+00 -2.0507075E+00 -2.0479044E+00 -2.0451058E+00
 -2.0423116E+00 -2.0395219E+00 -2.0367366E+00 -2.0339558E+00
 -2.0311793E+00 -2.0284073E+00 -2.0256398E+00 -2.0228765E+00
 -2.0201178E+00 -2.0173634E+00 -2.0146134E+00 -2.0118677E+00
 -2.0091265E+00 -2.0063896E+00 -2.0036570E+00 -2.0009288E+00
 -1.9982048E+00 -1.9954853E+00 -1.9927700E+00 -1.9900591E+00
 -1.9873525E+00 -1.9846501E+00 -1.9819520E+00 -1.9792583E+00
 -1.9765688E+00 -1.9738835E+00 -1.9712025E+00 -1.9685258E+00
 -1.9658532E+00 -1.9631849E+00 -1.9605209E+00 -1.9578611E+00
 -1.9552055E+00 -1.9525540E+00 -1.9499068E+00 -1.9472637E+00
 -1.9446249E+00 -1.9419902E+00 -1.9393597E+00 -1.9367333E+00
 -1.9341110E+00 -1.9314929E+00 -1.9288790E+00 -1.9262692E+00
 -1.9236635E+00 -1.9210619E+00 -1.9184644E+00 -1.9158710E+00
 -1.9132817E+00 -1.9106965E+00 -1.9081153E+00 -1.9055382E+00
 -1.9029652E+00 -1.9003962E+00 -1.8978313E+00 -1.8952704E+00
 -1.8927136E+00 -1.8901607E+00 -1.8876119E+00 -1.8850671E+00
 -1.8825263E+00 -1.8799895E+00 -1.8774566E+00 -1.8749278E+00
 -1.8724030E+00 -1.8698820E+00 -1.8673651E+00 -1.8648521E+00
 -1.8623431E+00 -1.8598379E+00 -1.8573368E+00 -1.8548395E+00
 -1.8523462E+00 -1.8498567E+00 -1.8473712E+00 -1.8448895E+00
 -1.8424118E+00 -1.8399380E+00 -1.8374680E+00 -1.8350018E+00
 -1.8325396E+00 -1.8300812E+00 -1.8276266E+00 -1.8251759E+00
 -1.8227290E+00 -1.8202859E+00 -1.8178467E+00 -1.8154112E+00
 -1.8129796E+00 -1.8105518E+00 -1.8081278E+00 -1.8057075E+00
 -1.8032910E+00 -1.8008783E+00 -1.7984694E+00 -1.7960642E+00
 -1.7936628E+00 -1.7912651E+00 -1.7888712E+00 -1.7864810E+00
 -1.7840945E+00 -1.7817117E+00 -1.7793327E+00 -1.7769573E+00
 -1.7745857E+00 -1.7722178E+00 -1.7698535E+00 -1.7674929E+00
 -1.7651360E+00 -1.7627827E+00 -1.7604331E+00 -1.7580872E+00
 -1.7557449E+00 -1.7534063E+00 -1.7510712E+00 -1.7487398E+00
 -1.7464121E+00 -1.7440879E+00 -1.7417673E+00 -1.7394504E+00
 -1.7371370E+00 -1.7348273E+00 -1.7325211E+00 -1.7302184E+00
 -1.7279195E+00 -1.7256239E+00 -1.7233320E+00 -1.7210437E+00
 -1.7187588E+00 -1.7164775E+00 -1.7141998E+00 -1.7119256E+00
 -1.7096549E+00 -1.7073877E+00 -1.7051240E+00 -1.7028638E+00
 -1.7006071E+00 -1.6983539E+00 -1.6961042E+00 -1.6938579E+00
 -1.6916151E+00 -1.6893758E+00 -1.6871399E+00 -1.6849076E+00
 -1.6826786E+00 -1.6804531E+00 -1.6782310E+00 -1.6760123E+00
 -1.6737971E+00 -1.6715853E+00 -1.6693769E+00 -1.6671719E+00
 -1.6649702E+00 -1.6627720E+00 -1.6605772E+00 -1.6583858E+00
 -1.6561976E+00 -1.6540130E+00 -1.6518316E+00 -1.6496536E+00
 -1.6474789E+00 -1.6453076E+00 -1.6431396E+00 -1.6409750E+00
 -1.6388137E+00 -1.6366557E+00 -1.6345010E+00 -1.6323497E+00
 -1.6302016E+00 -1.6280568E+00 -1.6259153E+00 -1.6237772E+00
 -1.6216423E+00 -1.6195106E+00 -1.6173823E+00 -1.6152572E+00
 -1.6131353E+00 -1.6110167E+00 -1.6089014E+00 -1.6067892E+00
 -1.6046804E+00 -1.6025747E+00 -1.6004723E+00 -1.5983731E+00
 -1.5962771E+00 -1.5941843E+00 -1.5920947E+00 -1.5900083E+00
 -1.5879251E+00 -1.5858451E+00 -1.5837683E+00 -1.5816946E+00
 -1.5796241E+00 -1.5775567E+00 -1.5754925E+00 -1.5734315E+00
 -1.5713736E+00 -1.5693188E+00 -1.5672672E+00 -1.5652187E+00
 -1.5631733E+00 -1.5611311E+00 -1.5590920E+00 -1.5570560E+00
 -1.5550230E+00 -1.5529931E+00 -1.5509664E+00 -1.5489428E+00
 -1.5469222E+00 -1.5449047E+00 -1.5428903E+00 -1.5408788E+00
 -1.5388706E+00 -1.5368653E+00 -1.5348631E+00 -1.5328639E+00
 -1.5308678E+00 -1.5288747E+00 -1.5268846E+00 -1.5248975E+00
 -1.5229135E+00 -1.5209325E+00 -1.5189545E+00 -1.5169794E+00
 -1.5150074E+00 -1.5130384E+00 -1.5110723E+00 -1.5091093E+00
 -1.5071492E+00 -1.5051920E+00 -1.5032379E+00 -1.5012867E+00
 -1.4993384E+00 -1.4973932E+00 -1.4954508E+00 -1.4935114E+00
 -1.4915749E+00 -1.4896413E+00 -1.4877107E+00 -1.4857830E+00
 -1.4838582E+00 -1.4819363E+00 -1.4800173E+00 -1.4781013E+00
 -1.4761880E+00 -1.4742778E+00 -1.4723703E+00 -1.4704658E+00
 -1.4685641E+00 -1.4666653E+00 -1.4647694E+00 -1.4628763E+00
 -1.4609861E+00 -1.4590987E+00 -1.4572142E+00 -1.4553325E+00
 -1.4534536E+00 -1.4515776E+00 -1.4497044E+00 -1.4478340E+00
 -1.4459664E+00 -1.4441017E+00 -1.4422397E+00 -1.4403806E+00
 -1.4385242E+00 -1.4366706E+00 -1.4348198E+00 -1.4329718E+00
 -1.4311266E+00 -1.4292842E+00 -1.4274445E+00 -1.4256076E+00
 -1.4237734E+00 -1.4219420E+00 -1.4201133E+00 -1.4182874E+00
 -1.4164642E+00 -1.4146437E+00 -1.4128260E+00 -1.4110110E+00
 -1.4091987E+00 -1.4073892E+00 -1.4055823E+00 -1.4037782E+00
 -1.4019767E+00 -1.4001779E+00 -1.3983819E+00 -1.3965885E+00
 -1.3947979E+00 -1.3930098E+00 -1.3912245E+00 -1.3894418E+00
 -1.3876619E+00 -1.3858845E+00 -1.3841098E+00 -1.3823378E+00
 -1.3805684E+00 -1.3788016E+00 -1.3770375E+00 -1.3752760E+00
 -1.3735172E+00 -1.3717610E+00 -1.3700073E+00 -1.3682564E+00
 -1.3665080E+00 -1.3647622E+00 -1.3630190E+00 -1.3612784E+00
 -1.3595405E+00 -1.3578050E+00 -1.3560722E+00 -1.3543420E+00
 -1.3526143E+00 -1.3508892E+00 -1.3491667E+00 -1.3474467E+00
 -1.3457294E+00 -1.3440145E+00 -1.3423022E+00 -1.3405925E+00
 -1.3388852E+00 -1.3371806E+00 -1.3354784E+00 -1.3337788E+00
 -1.3320817E+00 -1.3303871E+00 -1.3286950E+00 -1.3270055E+00
 -1.3253184E+00 -1.3236338E+00 -1.3219518E+00 -1.3202723E+00
 -1.3185952E+00 -1.3169206E+00 -1.3152485E+00 -1.3135789E+00
 -1.3119117E+00 -1.3102470E+00 -1.3085848E+00 -1.3069250E+00
 -1.3052678E+00 -1.3036129E+00 -1.3019605E+00 -1.3003105E+00
 -1.2986630E+00 -1.2970179E+00 -1.2953753E+00 -1.2937350E+00
 -1.2920972E+00 -1.2904618E+00 -1.2888288E+00 -1.2871982E+00
 -1.2855701E+00 -1.2839443E+00 -1.2823210E+00 -1.2807000E+00
 -1.2790814E+00 -1.2774652E+00 -1.2758514E+00 -1.2742400E+00
 -1.2726309E+00 -1.2710243E+00 -1.2694199E+00 -1.2678179E+00
 -1.2662183E+00 -1.2646211E+00 -1.2630262E+00 -1.2614336E+00
 -1.2598434E+00 -1.2582556E+00 -1.2566700E+00 -1.2550868E+00
 -1.2535060E+00 -1.2519274E+00 -1.2503512E+00 -1.2487772E+00
 -1.2472056E+00 -1.2456363E+00 -1.2440693E+00 -1.2425046E+00
 -1.2409422E+00 -1.2393821E+00 -1.2378242E+00 -1.2362687E+00
 -1.2347155E+00 -1.2331645E+00 -1.2316157E+00 -1.2300693E+00
 -1.2285251E+00 -1.2269832E+00 -1.2254435E+00 -1.2239061E+00
 -1.2223709E+00 -1.2208381E+00 -1.2193074E+00 -1.2177790E+00
 -1.2162527E+00 -1.2147288E+00 -1.2132071E+00 -1.2116876E+00
 -1.2101702E+00 -1.2086552E+00 -1.2071423E+00 -1.2056316E+00
 -1.2041232E+00 -1.2026169E+00 -1.2011129E+00 -1.1996110E+00
 -1.1981114E+00 -1.1966138E+00 -1.1951186E+00 -1.1936255E+00
 -1.1921345E+00 -1.1906457E+00 -1.1891591E+00 -1.1876747E+00
 -1.1861924E+00 -1.1847123E+00 -1.1832343E+00 -1.1817585E+00
 -1.1802848E+00 -1.1788133E+00 -1.1773439E+00 -1.1758767E+00
 -1.1744116E+00 -1.1729486E+00 -1.1714877E+00 -1.1700290E+00
 -1.1685724E+00 -1.1671178E+00 -1.1656655E+00 -1.1642152E+00
 -1.1627670E+00 -1.1613209E+00 -1.1598770E+00 -1.1584351E+00
 -1.1569952E+00 -1.1555576E+00 -1.1541219E+00 -1.1526884E+00
 -1.1512569E+00 -1.1498276E+00 -1.1484002E+00 -1.1469749E+00
 -1.1455517E+00 -1.1441306E+00 -1.1427116E+00 -1.1412945E+00
 -1.1398796E+00 -1.1384666E+00 -1.1370557E+00 -1.1356469E+00
 -1.1342401E+00 -1.1328353E+00 -1.1314325E+00 -1.1300318E+00
 -1.1286332E+00 -1.1272364E+00 -1.1258418E+00 -1.1244491E+00
 -1.1230585E+00 -1.1216699E+00 -1.1202833E+00 -1.1188986E+00
 -1.1175160E+00 -1.1161353E+00 -1.1147567E+00 -1.1133800E+00
 -1.1120054E+00 -1.1106326E+00 -1.1092619E+00 -1.1078931E+00
 -1.1065264E+00 -1.1051615E+00 -1.1037987E+00 -1.1024378E+00
 -1.1010788E+00 -1.0997219E+00 -1.0983668E+00 -1.0970138E+00
 -1.0956626E+00 -1.0943134E+00 -1.0929662E+00 -1.0916208E+00
 -1.0902774E+00 -1.0889360E+00 -1.0875964E+00 -1.0862588E+00
 -1.0849231E+00 -1.0835893E+00 -1.0822574E+00 -1.0809275E+00
 -1.0795994E+00 -1.0782733E+00 -1.0769490E+00 -1.0756267E+00
 -1.0743062E+00 -1.0729877E+00 -1.0716710E+00 -1.0703561E+00
 -1.0690433E+00 -1.0677322E+00 -1.0664230E+00 -1.0651157E+00
 -1.0638103E+00 -1.0625068E+00 -1.0612051E+00 -1.0599053E+00
 -1.0586072E+00 -1.0573112E+00 -1.0560169E+00 -1.0547244E+00
 -1.0534339E+00 -1.0521452E+00 -1.0508582E+00 -1.0495732E+00
 -1.0482899E+00 -1.0470086E+00 -1.0457290E+00 -1.0444512E+00
 -1.0431753E+00 -1.0419012E+00 -1.0406289E+00 -1.0393584E+00
 -1.0380898E+00 -1.0368229E+00 -1.0355579E+00 -1.0342946E+00
 -1.0330331E+00 -1.0317734E+00 -1.0305155E+00 -1.0292595E+00
 -1.0280051E+00 -1.0267526E+00 -1.0255019E+00 -1.0242530E+00
 -1.0230058E+00 -1.0217603E+00 -1.0205167E+00 -1.0192748E+00
 -1.0180347E+00 -1.0167963E+00 -1.0155597E+00 -1.0143249E+00
 -1.0130918E+00 -1.0118604E+00 -1.0106309E+00 -1.0094030E+00
 -1.0081769E+00 -1.0069525E+00 -1.0057298E+00 -1.0045089E+00
 -1.0032897E+00 -1.0020722E+00 -1.0008566E+00 -9.9964253E-01
 -9.9843023E-01 -9.9721965E-01 -9.9601073E-01 -9.9480360E-01
 -9.9359813E-01 -9.9239438E-01 -9.9119235E-01 -9.8999198E-01
 -9.8879333E-01 -9.8759633E-01 -9.8640105E-01 -9.8520750E-01
 -9.8401560E-01 -9.8282535E-01 -9.8163683E-01 -9.8044995E-01
 -9.7926473E-01 -9.7808123E-01 -9.7689938E-01 -9.7571918E-01
 -9.7454070E-01 -9.7336380E-01 -9.7218863E-01 -9.7101503E-01
 -9.6984315E-01 -9.6867293E-01 -9.6750428E-01 -9.6633735E-01
 -9.6517200E-01 -9.6400838E-01 -9.6284633E-01 -9.6168593E-01
 -9.6052718E-01 -9.5937000E-01 -9.5821448E-01 -9.5706060E-01
 -9.5590830E-01 -9.5475765E-01 -9.5360858E-01 -9.5246115E-01
 -9.5131538E-01 -9.5017118E-01 -9.4902855E-01 -9.4788758E-01
 -9.4674818E-01 -9.4561035E-01 -9.4447410E-01 -9.4333950E-01
 -9.4220648E-01 -9.4107503E-01 -9.3994523E-01 -9.3881693E-01
 -9.3769020E-01 -9.3656513E-01 -9.3544155E-01 -9.3431963E-01
  3.2922791E+04  6.5542472E+04  9.7861140E+04  1.2988088E+05
  1.6160374E+05  1.9303179E+05  2.2416707E+05  2.5501161E+05
  2.8556743E+05  3.1583652E+05  3.4582089E+05  3.7552250E+05
  4.0494335E+05  4.3408536E+05  4.6295050E+05  4.9154069E+05
  5.1985784E+05  5.4790388E+05  5.7568068E+05  6.0319015E+05
  6.3043415E+05  6.5741454E+05  6.8413318E+05  7.1059189E+05
  7.3679252E+05  7.6273688E+05  7.8842670E+05  8.1386393E+05
  8.3905020E+05  8.6398740E+05  8.8867718E+05  9.1312140E+05
  9.3732165E+05  9.6127980E+05  9.8499750E+05  1.0084765E+06
  1.0317185E+06  1.0547251E+06  1.0774980E+06  1.1000389E+06
  1.1223494E+06  1.1444313E+06  1.1662860E+06  1.1879153E+06
  1.2093208E+06  1.2305040E+06  1.2514665E+06  1.2722100E+06
  1.2927360E+06  1.3130460E+06  1.3331417E+06  1.3530245E+06
  1.3726961E+06  1.3921578E+06  1.4114113E+06  1.4304580E+06
  1.4492995E+06  1.4679371E+06  1.4863725E+06  1.5046071E+06
  1.5226422E+06  1.5404795E+06  1.5581202E+06  1.5755660E+06
  1.5928180E+06  1.6098779E+06  1.6267469E+06  1.6434265E+06
  1.6599181E+06  1.6762230E+06  1.6923426E+06  1.7082783E+06
  1.7240315E+06  1.7396033E+06  1.7549954E+06  1.7702087E+06
  1.7852449E+06  1.8001052E+06  1.8147908E+06  1.8293030E+06
  1.8436431E+06  1.8578125E+06  1.8718124E+06  1.8856440E+06
  1.8993086E+06  1.9128074E+06  1.9261417E+06  1.9393127E+06
  1.9523216E+06  1.9651697E+06  1.9778581E+06  1.9903880E+06
  2.0027607E+06  2.0149773E+06  2.0270390E+06  2.0389469E+06
  2.0507023E+06  2.0623062E+06  2.0737598E+06  2.0850643E+06
  2.0962208E+06  2.1072303E+06  2.1180941E+06  2.1288132E+06
  2.1393887E+06  2.1498218E+06  2.1601134E+06  2.1702648E+06
  2.1802769E+06  2.1901509E+06  2.1998878E+06  2.2094885E+06
  2.2189544E+06  2.2282862E+06  2.2374851E+06  2.2465520E+06
  2.2554881E+06  2.2642943E+06  2.2729717E+06  2.2815212E+06
  2.2899437E+06  2.2982405E+06  2.3064122E+06  2.3144601E+06
  2.3223850E+06  2.3301879E+06  2.3378697E+06  2.3454314E+06
  2.3528740E+06  2.3601983E+06  2.3674055E+06  2.3744961E+06
  2.3814713E+06  2.3883321E+06  2.3950792E+06  2.4017135E+06
  2.4082361E+06  2.4146476E+06  2.4209492E+06  2.4271415E+06
  2.4332255E+06  2.4392021E+06  2.4450721E+06  2.4508363E+06
  2.4564957E+06  2.4620510E+06  2.4675032E+06  2.4728529E+06
  2.4781012E+06  2.4832487E+06  2.4882963E+06  2.4932448E+06
  2.4980951E+06  2.5028477E+06  2.5075038E+06  2.5120640E+06
  2.5165290E+06  2.5208997E+06  2.5251768E+06  2.5293611E+06
  2.5334534E+06  2.5374544E+06  2.5413649E+06  2.5451856E+06
  2.5489173E+06  2.5525607E+06  2.5561166E+06  2.5595856E+06
  2.5629685E+06  2.5662660E+06  2.5694789E+06  2.5726078E+06
  2.5756535E+06  2.5786166E+06  2.5814978E+06  2.5842978E+06
  2.5870174E+06  2.5896572E+06  2.5922179E+06  2.5947001E+06
  2.5971045E+06  2.5994318E+06  2.6016827E+06  2.6038577E+06
  2.6059575E+06  2.6079829E+06  2.6099344E+06  2.6118127E+06
  2.6136184E+06  2.6153521E+06  2.6170144E+06  2.6186060E+06
  2.6201276E+06  2.6215796E+06  2.6229627E+06  2.6242775E+06
  2.6255247E+06  2.6267048E+06  2.6278184E+06  2.6288660E+06
  2.6298483E+06  2.6307659E+06  2.6316193E+06  2.6324091E+06
  2.6331359E+06  2.6338001E+06  2.6344025E+06  2.6349435E+06
  2.6354237E+06  2.6358437E+06  2.6362040E+06  2.6365050E+06
  2.6367474E+06  2.6369318E+06  2.6370585E+06  2.6371283E+06
  2.6371415E+06  2.6370986E+06  2.6370003E+06  2.6368471E+06
  2.6366393E+06  2.6363776E+06  2.6360624E+06  2.6356943E+06
  2.6352737E+06  2.6348011E+06  2.6342771E+06  2.6337020E+06
  2.6330763E+06  2.6324007E+06  2.6316755E+06  2.6309011E+06
  2.6300781E+06  2.6292070E+06  2.6282881E+06  2.6273220E+06
  2.6263091E+06  2.6252498E+06  2.6241446E+06  2.6229941E+06
  2.6217984E+06  2.6205582E+06  2.6192738E+06  2.6179458E+06
  2.6165744E+06  2.6151602E+06  2.6137037E+06  2.6122050E+06
  2.6106648E+06  2.6090834E+06  2.6074613E+06  2.6057988E+06
  2.6040964E+06  2.6023544E+06  2.6005733E+06  2.5987534E+06
  2.5968951E+06  2.5949990E+06  2.5930652E+06  2.5910942E+06
  2.5890865E+06  2.5870423E+06  2.5849621E+06  2.5828462E+06
  2.5806950E+06  2.5785089E+06  2.5762883E+06  2.5740334E+06
  2.5717447E+06  2.5694225E+06  2.5670672E+06  2.5646792E+06
  2.5622587E+06  2.5598062E+06  2.5573220E+06  2.5548063E+06
  2.5522597E+06  2.5496824E+06  2.5470746E+06  2.5444370E+06
  2.5417696E+06  2.5390728E+06  2.5363470E+06  2.5335925E+06
  2.5308096E+06  2.5279986E+06  2.5251599E+06  2.5222938E+06
  2.5194005E+06  2.5164805E+06  2.5135339E+06  2.5105611E+06
  2.5075625E+06  2.5045382E+06  2.5014886E+06  2.4984140E+06
  2.4953148E+06  2.4921911E+06  2.4890434E+06  2.4858717E+06
  2.4826766E+06  2.4794582E+06  2.4762168E+06  2.4729527E+06
  2.4696662E+06  2.4663575E+06  2.4630270E+06  2.4596749E+06
  2.4563014E+06  2.4529069E+06  2.4494915E+06  2.4460557E+06
  2.4425996E+06  2.4391234E+06  2.4356275E+06  2.4321121E+06
  2.4285774E+06  2.4250238E+06  2.4214514E+06  2.4178605E+06
  2.4142514E+06  2.4106242E+06  2.4069793E+06  2.4033169E+06
  2.3996372E+06  2.3959403E+06  2.3922268E+06  2.3884966E+06
  2.3847501E+06  2.3809874E+06  2.3772089E+06  2.3734147E+06
  2.3696051E+06  2.3657802E+06  2.3619404E+06  2.3580857E+06
  2.3542165E+06  2.3503329E+06  2.3464352E+06  2.3425236E+06
  2.3385983E+06  2.3346595E+06  2.3307074E+06  2.3267422E+06
  2.3227641E+06  2.3187734E+06  2.3147702E+06  2.3107547E+06
  2.3067270E+06  2.3026875E+06  2.2986364E+06  2.2945737E+06
  2.2904997E+06  2.2864146E+06  2.2823186E+06  2.2782119E+06
  2.2740945E+06  2.2699668E+06  2.2658290E+06  2.2616811E+06
  2.2575234E+06  2.2533560E+06  2.2491792E+06  2.2449931E+06
  2.2407979E+06  2.2365937E+06  2.2323807E+06  2.2281591E+06
  2.2239291E+06  2.2196909E+06  2.2154444E+06  2.2111901E+06
  2.2069280E+06  2.2026583E+06  2.1983811E+06  2.1940967E+06
  2.1898050E+06  2.1855065E+06  2.1812010E+06  2.1768889E+06
  2.1725703E+06  2.1682453E+06  2.1639141E+06  2.1595768E+06
  2.1552336E+06  2.1508846E+06  2.1465300E+06  2.1421699E+06
  2.1378044E+06  2.1334338E+06  2.1290581E+06  2.1246775E+06
  2.1202921E+06  2.1159020E+06  2.1115074E+06  2.1071085E+06
  2.1027053E+06  2.0982980E+06  2.0938867E+06  2.0894715E+06
  2.0850527E+06  2.0806302E+06  2.0762043E+06  2.0717750E+06
  2.0673425E+06  2.0629070E+06  2.0584685E+06  2.0540270E+06
  2.0495829E+06  2.0451362E+06  2.0406869E+06  2.0362353E+06
  2.0317814E+06  2.0273255E+06  2.0228674E+06  2.0184074E+06
  2.0139457E+06  2.0094822E+06  2.0050172E+06  2.0005507E+06
  1.9960828E+06  1.9916137E+06  1.9871434E+06  1.9826720E+06
  1.9781998E+06  1.9737267E+06  1.9692528E+06  1.9647783E+06
  1.9603033E+06  1.9558279E+06  1.9513520E+06  1.9468760E+06
  1.9423999E+06  1.9379237E+06  1.9334475E+06  1.9289714E+06
  1.9244957E+06  1.9200202E+06  1.9155452E+06  1.9110707E+06
  1.9065968E+06  1.9021235E+06  1.8976511E+06  1.8931796E+06
  1.8887090E+06  1.8842393E+06  1.8797709E+06  1.8753037E+06
  1.8708377E+06  1.8663732E+06  1.8619101E+06  1.8574485E+06
  1.8529886E+06  1.8485303E+06  1.8440739E+06  1.8396193E+06
  1.8351666E+06  1.8307160E+06  1.8262674E+06  1.8218210E+06
  1.8173768E+06  1.8129350E+06  1.8084955E+06  1.8040585E+06
  1.7996240E+06  1.7951921E+06  1.7907629E+06  1.7863364E+06
  1.7819127E+06  1.7774919E+06  1.7730740E+06  1.7686592E+06
  1.7642474E+06  1.7598388E+06  1.7554333E+06  1.7510312E+06
  1.7466323E+06  1.7422368E+06  1.7378448E+06  1.7334563E+06
  1.7290715E+06  1.7246902E+06  1.7203127E+06  1.7159388E+06
  1.7115688E+06  1.7072027E+06  1.7028405E+06  1.6984823E+06
  1.6941281E+06  1.6897780E+06  1.6854321E+06  1.6810904E+06
  1.6767529E+06  1.6724198E+06  1.6680909E+06  1.6637666E+06
  1.6594466E+06  1.6551313E+06  1.6508204E+06  1.6465142E+06
  1.6422126E+06  1.6379158E+06  1.6336238E+06  1.6293365E+06
  1.6250540E+06  1.6207765E+06  1.6165040E+06  1.6122364E+06
  1.6079738E+06  1.6037163E+06  1.5994640E+06  1.5952168E+06
  1.5909749E+06  1.5867381E+06  1.5825067E+06  1.5782806E+06
  1.5740599E+06  1.5698446E+06  1.5656348E+06  1.5614303E+06
  1.5572315E+06  1.5530383E+06  1.5488507E+06  1.5446687E+06
  1.5404923E+06  1.5363217E+06  1.5321569E+06  1.5279977E+06
  1.5238445E+06  1.5196971E+06  1.5155557E+06  1.5114201E+06
  1.5072905E+06  1.5031669E+06  1.4990493E+06  1.4949377E+06
  1.4908323E+06  1.4867330E+06  1.4826398E+06  1.4785528E+06
  1.4744720E+06  1.4703974E+06  1.4663292E+06  1.4622672E+06
  1.4582115E+06  1.4541623E+06  1.4501193E+06  1.4460828E+06
  1.4420527E+06  1.4380291E+06  1.4340119E+06  1.4300013E+06
  1.4259972E+06  1.4219997E+06  1.4180087E+06  1.4140244E+06
  1.4100467E+06  1.4060757E+06  1.4021114E+06  1.3981537E+06
  1.3942028E+06  1.3902586E+06  1.3863212E+06  1.3823905E+06
  1.3784667E+06  1.3745497E+06  1.3706396E+06  1.3667363E+06
  1.3628399E+06  1.3589505E+06  1.3550680E+06  1.3511924E+06
  1.3473238E+06  1.3434621E+06  1.3396075E+06  1.3357599E+06
  1.3319193E+06  1.3280858E+06  1.3242594E+06  1.3204400E+06
  1.3166278E+06  1.3128226E+06  1.3090246E+06  1.3052337E+06
  1.3014500E+06  1.2976735E+06  1.2939042E+06  1.2901421E+06
  1.2863871E+06  1.2826394E+06  1.2788990E+06  1.2751658E+06
  1.2714399E+06  1.2677213E+06  1.2640100E+06  1.2603059E+06
  1.2566093E+06  1.2529199E+06  1.2492378E+06  1.2455631E+06
  1.2418958E+06  1.2382358E+06  1.2345832E+06  1.2309380E+06
  1.2273002E+06  1.2236698E+06  1.2200468E+06  1.2164313E+06
  1.2128232E+06  1.2092225E+06  1.2056293E+06  1.2020435E+06
  1.1984652E+06  1.1948944E+06  1.1913310E+06  1.1877752E+06
  1.1842268E+06  1.1806859E+06  1.1771525E+06  1.1736267E+06
  1.1701083E+06  1.1665975E+06  1.1630942E+06  1.1595985E+06
  1.1561102E+06  1.1526296E+06  1.1491565E+06  1.1456909E+06
  1.1422328E+06  1.1387824E+06  1.1353394E+06  1.1319041E+06
  1.1284763E+06  1.1250562E+06  1.1216435E+06  1.1182385E+06
  1.1148410E+06  1.1114512E+06  1.1080688E+06  1.1046941E+06
  1.1013271E+06  1.0979675E+06  1.0946156E+06  1.0912712E+06
  1.0879345E+06  1.0846054E+06  1.0812838E+06  1.0779698E+06
  1.0746635E+06  1.0713647E+06  1.0680736E+06  1.0647900E+06
  1.0615140E+06  1.0582457E+06  1.0549849E+06  1.0517317E+06
  1.0484861E+06  1.0452482E+06  1.0420178E+06  1.0387949E+06
  1.0355797E+06  1.0323721E+06  1.0291721E+06  1.0259796E+06
  1.0227947E+06  1.0196174E+06  1.0164477E+06  1.0132856E+06
  1.0101311E+06  1.0069841E+06  1.0038446E+06  1.0007128E+06
  9.9758850E+05  9.9447173E+05  9.9136253E+05  9.8826090E+05
  9.8516685E+05  9.8208030E+05  9.7900133E+05  9.7592985E+05
  9.7286588E+05  9.6980948E+05  9.6676065E+05  9.6371925E+05
  9.6068543E+05  9.5765910E+05  9.5464028E+05  9.5162895E+05
  9.4862513E+05  9.4562880E+05  9.4263990E+05  9.3965850E+05
  9.3668460E+05  9.3371820E+05  9.3075923E+05  9.2780768E+05
  9.2486363E+05  9.2192700E+05  9.1899780E+05  9.1607603E+05
  9.1316168E+05  9.1025483E+05  9.0735533E+05  9.0446318E+05
  9.0157853E+05  8.9870123E+05  8.9583128E+05  8.9296875E+05
  8.9011358E+05  8.8726575E+05  8.8442535E+05  8.8159223E+05
  8.7876645E+05  8.7594810E+05  8.7313695E+05  8.7033323E+05
  8.6753670E+05  8.6474760E+05  8.6196570E+05  8.5919115E+05
  8.5642380E+05  8.5366380E+05  8.5091100E+05  8.4816555E+05
  8.4542723E+05  8.4269625E+05  8.3997240E+05  8.3725583E+05
  8.3454645E+05  8.3184428E+05  8.2914930E+05  8.2646153E+05
  8.2378095E+05  8.2110750E+05  8.1844118E+05  8.1578205E+05
  8.1313005E+05  8.1048518E+05  8.0784743E+05  8.0521680E+05
  8.0259323E+05  7.9997678E+05  7.9736738E+05  7.9476510E+05
  7.9216988E+05  7.8958170E+05  7.8700050E+05  7.8442643E+05
  7.8185933E+05  7.7929928E+05  7.7674613E+05  7.7420010E+05
  7.7166098E+05  7.6912883E+05  7.6660365E+05  7.6408545E+05
  7.6157415E+05  7.5906983E+05  7.5657240E+05  7.5408188E+05
  7.5159818E+05  7.4912147E+05  7.4665160E+05  7.4418860E+05
  7.4173244E+05  7.3928314E+05  7.3684066E+05  7.3440501E+05
  7.3197617E+05  7.2955412E+05  7.2713887E+05  7.2473039E+05
  7.2232868E+05  7.1993372E+05  7.1754550E+05  7.1516401E+05
  7.1278925E+05  7.1042119E+05  7.0805984E+05  7.0570516E+05
  7.0335716E+05  7.0101583E+05  6.9868115E+05  6.9635310E+05
  6.9403169E+05  6.9171689E+05  6.8940869E+05  6.8710709E+05
  6.8481207E+05  6.8252362E+05  6.8024172E+05  6.7796637E+05
  6.7569756E+05  6.7343526E+05  6.7117948E+05  6.6893019E+05
  6.6668739E+05  6.6445107E+05  6.6222120E+05  6.5999779E+05
  6.5778081E+05  6.5557025E+05  6.5336612E+05  6.5116838E+05
  6.4897703E+05  6.4679205E+05  6.4461344E+05  6.4244118E+05
  6.4027526E+05  6.3811568E+05  6.3596240E+05  6.3381542E+05
  6.3167474E+05  6.2954033E+05  6.2741219E+05  6.2529030E+05
  6.2317465E+05  6.2106523E+05  6.1896203E+05  6.1686503E+05
  6.1477421E+05  6.1268957E+05  6.1061111E+05  6.0853879E+05
  6.0647261E+05  6.0441256E+05  6.0235862E+05  6.0031079E+05
  5.9826905E+05  5.9623338E+05  5.9420378E+05  5.9218022E+05
  5.9016271E+05  5.8815122E+05  5.8614575E+05  5.8414628E+05
  5.8215279E+05  5.8016528E+05  5.7818373E+05  5.7620813E+05
  5.7423847E+05  5.7227473E+05  5.7031690E+05  5.6836497E+05
  5.6641892E+05  5.6447875E+05  5.6254444E+05  5.6061597E+05
  5.5869334E+05  5.5677653E+05  5.5486553E+05  5.5296032E+05
  5.5106090E+05  5.4916724E+05  5.4727935E+05  5.4539720E+05
  5.4352077E+05  5.4165007E+05  5.3978507E+05  5.3792576E+05
  5.3607214E+05  5.3422418E+05  5.3238188E+05  5.3054521E+05
  5.2871417E+05  5.2688876E+05  5.2506893E+05  5.2325471E+05
  5.2144605E+05  5.1964296E+05  5.1784542E+05  5.1605342E+05
  5.1426695E+05  5.1248598E+05  5.1071051E+05  5.0894054E+05
  5.0717603E+05  5.0541698E+05  5.0366339E+05  5.0191523E+05
  5.0017248E+05  4.9843515E+05  4.9670321E+05  4.9497666E+05
  4.9325548E+05  4.9153965E+05  4.8982917E+05  4.8812402E+05
  4.8642419E+05  4.8472967E+05  4.8304044E+05  4.8135649E+05
  4.7967781E+05  4.7800438E+05  4.7633620E+05  4.7467324E+05
  4.7301550E+05  4.7136296E+05  4.6971562E+05  4.6807345E+05
  4.6643645E+05  4.6480460E+05  4.6317789E+05  4.6155631E+05
  4.5993984E+05  4.5832847E+05  4.5672219E+05  4.5512099E+05
  4.5352485E+05  4.5193376E+05  4.5034772E+05  4.4876669E+05
  4.4719068E+05  4.4561967E+05  4.4405365E+05  4.4249260E+05
  4.4093651E+05  4.3938538E+05  4.3783918E+05  4.3629791E+05
  4.3476154E+05  4.3323008E+05  4.3170350E+05  4.3018180E+05
  4.2866496E+05  4.2715297E+05  4.2564581E+05  4.2414348E+05
  4.2264596E+05  4.2115325E+05  4.1966531E+05  4.1818215E+05
  4.1670376E+05  4.1523011E+05  4.1376120E+05  4.1229701E+05
  4.1083754E+05  4.0938277E+05  4.0793268E+05  4.0648727E+05
  4.0504653E+05  4.0361043E+05  4.0217897E+05  4.0075214E+05
  3.9932993E+05  3.9791231E+05  3.9649928E+05  3.9509084E+05
  3.9368696E+05  3.9228762E+05  3.9089283E+05  3.8950257E+05
  3.8811683E+05  3.8673559E+05  3.8535884E+05  3.8398657E+05
  3.8261877E+05  3.8125542E+05  3.7989653E+05  3.7854206E+05
  3.7719200E+05  3.7584637E+05  3.7450512E+05  3.7316826E+05
  3.7183577E+05  3.7050764E+05  3.6918386E+05  3.6786442E+05
  3.6654929E+05  3.6523849E+05  3.6393198E+05  3.6262976E+05
  3.6133182E+05  3.6003815E+05  3.5874872E+05  3.5746355E+05
  3.5618260E+05  3.5490587E+05  3.5363334E+05  3.5236502E+05
  3.5110087E+05  3.4984089E+05  3.4858508E+05  3.4733341E+05
  3.4608588E+05  3.4484248E+05  3.4352980E+05  3.4229702E+05
  3.4106986E+05  3.3984832E+05  3.3863237E+05  3.3742199E+05
  3.3621717E+05  3.3501790E+05  3.3382415E+05  3.3263591E+05
  3.3145316E+05  3.3027587E+05  3.2910404E+05  3.2793765E+05
  3.2677667E+05  3.2562110E+05  3.2447091E+05  3.2332609E+05
  3.2218661E+05  3.2105246E+05  3.1992362E+05  3.1880007E+05
  3.1768180E+05  3.1656878E+05  3.1546100E+05  3.1435844E+05
  3.1326107E+05  3.1216890E+05  3.1108188E+05  3.1000001E+05
  3.0892327E+05  3.0785163E+05  3.0678509E+05  3.0572360E+05
  3.0466718E+05  3.0361578E+05  3.0256940E+05  3.0152801E+05
  3.0049160E+05  2.9946014E+05  2.9843362E+05  2.9741202E+05
  2.9639531E+05  2.9538349E+05  2.9437652E+05  2.9337440E+05
  2.9237709E+05  2.9138459E+05  2.9039687E+05  2.8941392E+05
  2.8843570E+05  2.8746221E+05  2.8649342E+05  2.8552931E+05
  2.8456987E+05  2.8361507E+05  2.8266491E+05  2.8171934E+05
  2.8077836E+05  2.7984194E+05  2.7891007E+05  2.7798272E+05
  2.7705988E+05  2.7614153E+05  2.7522763E+05  2.7431819E+05
  2.7341316E+05  2.7251255E+05  2.7161631E+05  2.7072444E+05
  2.6983691E+05  2.6895371E+05  2.6807481E+05  2.6720020E+05
  2.6632985E+05  2.6546373E+05  2.6460185E+05  2.6374415E+05
  2.6289065E+05  2.6204130E+05  2.6119609E+05  2.6035500E+05
  2.5951801E+05  2.5868510E+05  2.5785624E+05  2.5703143E+05
  2.5621063E+05  2.5539382E+05  2.5458099E+05  2.5377211E+05
  2.5296716E+05  2.5216613E+05  2.5136900E+05  2.5057573E+05
  2.4978631E+05  2.4900072E+05  2.4821894E+05  2.4744095E+05
  2.4666673E+05  2.4589625E+05  2.4512950E+05  2.4436645E+05
  2.4360708E+05  2.4285138E+05  2.4209932E+05  2.4135088E+05
  2.4060605E+05  2.3986478E+05  2.3912708E+05  2.3839292E+05
  2.3766227E+05  2.3693511E+05  2.3621144E+05  2.3549121E+05
  2.3477441E+05  2.3406104E+05  2.3335104E+05  2.3264442E+05
  2.3194115E+05  2.3124120E+05  2.3054456E+05  2.2985121E+05
  2.2916112E+05  2.2847427E+05  2.2779065E+05  2.2711022E+05
  2.2643299E+05  2.2575890E+05  2.2508796E+05  2.2442014E+05
  2.2375541E+05  2.2309376E+05  2.2243516E+05  2.2177959E+05
  2.2112704E+05  2.2047748E+05  2.1983090E+05  2.1918725E+05
  2.1854655E+05  2.1790875E+05  2.1727384E+05  2.1664179E+05
  2.1601259E+05  2.1538622E+05  2.1476264E+05  2.1414185E+05
  2.1352383E+05  2.1290855E+05  2.1229598E+05  2.1168612E+05
  2.1107894E+05  2.1047441E+05  2.0987253E+05  2.0927326E+05
  2.0867659E+05  2.0808249E+05  2.0749095E+05  2.0690195E+05
  2.0631545E+05  2.0573145E+05  2.0514993E+05  2.0457086E+05
  2.0399421E+05  2.0341998E+05  2.0284814E+05  2.0227868E+05
  2.0171156E+05  2.0114677E+05  2.0058429E+05  2.0002410E+05
  1.9946618E+05  1.9891051E+05  1.9835707E+05  1.9780583E+05
  1.9725678E+05  1.9670990E+05  1.9616517E+05  1.9562257E+05
  1.9508207E+05  1.9454366E+05  1.9400732E+05  1.9347302E+05
  1.9294076E+05  1.9241049E+05  1.9188222E+05  1.9135592E+05
  1.9083156E+05  1.9030913E+05  1.8978862E+05  1.8926999E+05
  1.8875323E+05  1.8823832E+05  1.8772523E+05  1.8721397E+05
  1.8670448E+05  1.8619678E+05  1.8569082E+05  1.8518660E+05
  1.8468410E+05  1.8418328E+05  1.8368414E+05  1.8318666E+05
  1.8269082E+05  1.8219659E+05  1.8170396E+05  1.8121292E+05
  1.8072343E+05  1.8023548E+05  1.7974906E+05  1.7926414E+05
  1.7878071E+05  1.7829875E+05  1.7781823E+05  1.7733914E+05
  1.7686146E+05  1.7638518E+05  1.7591027E+05  1.7543672E+05
  1.7496450E+05  1.7449361E+05  1.7402401E+05  1.7355569E+05
  1.7308865E+05  1.7262284E+05  1.7215827E+05  1.7169491E+05
  1.7123274E+05  1.7077175E+05  1.7031191E+05  1.6985321E+05
  1.6939564E+05  1.6893917E+05  1.6848379E+05  1.6802947E+05
  1.6757621E+05  1.6712398E+05  1.6667277E+05  1.6622256E+05
  1.6577333E+05  1.6532508E+05  1.6487777E+05  1.6443139E+05
  1.6398593E+05  1.6354136E+05  1.6309768E+05  1.6265486E+05
  1.6221290E+05  1.6177175E+05  1.6133144E+05  1.6089191E+05
  1.6045318E+05  1.6001521E+05  1.5957799E+05  1.5914150E+05
  1.5870573E+05  1.5827067E+05  1.5783629E+05  1.5740258E+05
  1.5696953E+05  1.5653712E+05  1.5610534E+05  1.5567416E+05
  1.5524357E+05  1.5481357E+05  1.5438413E+05  1.5395522E+05
  1.5352686E+05  1.5309902E+05  1.5267167E+05  1.5224482E+05
  1.5181844E+05  1.5139252E+05  1.5096704E+05  1.5054199E+05
  1.5011735E+05  1.4969312E+05  1.4926928E+05  1.4884580E+05
  1.4842269E+05  1.4799992E+05  1.4757748E+05  1.4715536E+05
  1.4673354E+05  1.4631201E+05  1.4589076E+05  1.4546977E+05
  1.4504903E+05  1.4462852E+05  1.4420824E+05  1.4378817E+05
  1.4336830E+05  1.4294861E+05  1.4252909E+05  1.4210973E+05
  1.4169052E+05  1.4127144E+05  1.4085248E+05  1.4043363E+05
  1.4001488E+05  1.3959622E+05  1.3917763E+05  1.3875909E+05
  1.3834061E+05  1.3792217E+05  1.3750375E+05  1.3708535E+05
  1.3666695E+05  1.3624854E+05  1.3583012E+05  1.3541166E+05
  1.3499317E+05  1.3457462E+05  1.3415601E+05  1.3373732E+05
  1.3331856E+05  1.3289970E+05  1.3248074E+05  1.3206166E+05
  1.3164245E+05  1.3122311E+05  1.3080364E+05  1.3038400E+05
  1.2996420E+05  1.2954423E+05  1.2912408E+05  1.2870374E+05
  1.2828319E+05  1.2786243E+05  1.2744146E+05  1.2702026E+05
  1.2659882E+05  1.2617714E+05  1.2575520E+05  1.2533300E+05
  1.2491054E+05  1.2448779E+05  1.2406476E+05  1.2364144E+05
  1.2321782E+05  1.2279388E+05  1.2236963E+05  1.2194506E+05
  1.2152015E+05  1.2109491E+05  1.2066932E+05  1.2024338E+05
  1.1981708E+05  1.1939042E+05  1.1896338E+05  1.1853597E+05
  1.1810817E+05  1.1767998E+05  1.1725139E+05  1.1682241E+05
  1.1639301E+05  1.1596320E+05  1.1553298E+05  1.1510233E+05
  1.1467124E+05  1.1423973E+05  1.1380778E+05  1.1337537E+05
  1.1294252E+05  1.1250923E+05  1.1207546E+05  1.1164124E+05
  1.1120656E+05  1.1077140E+05  1.1033577E+05  1.0989967E+05
  1.0946308E+05  1.0902600E+05  1.0858844E+05  1.0815039E+05
  1.0771185E+05  1.0727281E+05  1.0683327E+05  1.0639322E+05
  1.0595268E+05  1.0551163E+05  1.0507007E+05  1.0462800E+05
  1.0418541E+05  1.0374232E+05  1.0329871E+05  1.0285457E+05
  1.0240993E+05  1.0196477E+05  1.0151908E+05  1.0107287E+05
  1.0062614E+05  1.0017890E+05  9.9731123E+04  9.9282825E+04
  9.8834010E+04  9.8384670E+04  9.7934813E+04  9.7484430E+04
  9.7033530E+04  9.6582105E+04  9.6130163E+04  9.5677703E+04
  9.5224725E+04  9.4771238E+04  9.4317225E+04  9.3862710E+04
  9.3407685E+04  9.2952143E+04  9.2496105E+04  9.2039558E+04
  9.1582508E+04  9.1124963E+04  9.0666923E+04  9.0208388E+04
  8.9749365E+04  8.9289855E+04  8.8829865E+04  8.8369395E+04
  8.7908445E+04  8.7447030E+04  8.6985143E+04  8.6522798E+04
  8.6059995E+04  8.5596735E+04  8.5133025E+04  8.4668880E+04
  8.4204285E+04  8.3739270E+04  8.3273820E+04  8.2807943E+04
  8.2341660E+04  8.1874965E+04  8.1407865E+04  8.0940368E+04
  8.0472480E+04  8.0004203E+04  7.9535558E+04  7.9066538E+04
  7.8597158E+04  7.8127418E+04  7.7657340E+04  7.7186910E+04
  7.6716158E+04  7.6245083E+04  7.5773685E+04  7.5301988E+04
  7.4829991E+04  7.4357705E+04  7.3885139E+04  7.3412303E+04
  7.2939205E+04  7.2465857E+04  7.1992267E+04  7.1518445E+04
  7.1044403E+04  7.0570149E+04  7.0095695E+04  6.9621052E+04
  6.9146231E+04  6.8671241E+04  6.8196096E+04  6.7720807E+04
  6.7245384E+04  6.6769841E+04  6.6294189E+04  6.5818441E+04
  6.5342609E+04  6.4866706E+04  6.4390744E+04  6.3914737E+04
  6.3438698E+04  6.2962641E+04  6.2486579E+04  6.2010526E+04
  6.1534496E+04  6.1058503E+04  6.0582563E+04  6.0106688E+04
  5.9630896E+04  5.9155199E+04  5.8679615E+04  5.8204157E+04
  5.7728843E+04  5.7253687E+04  5.6778707E+04  5.6303917E+04
  5.5829335E+04  5.5354977E+04  5.4880860E+04  5.4407002E+04
  5.3933420E+04  5.3460130E+04  5.2987151E+04  5.2514502E+04
  5.2042199E+04  5.1570262E+04  5.1098709E+04  5.0627558E+04
  5.0156829E+04  4.9686542E+04  4.9216714E+04  4.8747366E+04
  4.8278518E+04  4.7810190E+04  4.7342402E+04  4.6875175E+04
  4.6408529E+04  4.5942485E+04  4.5477065E+04  4.5012290E+04
  4.4548181E+04  4.4084759E+04  4.3622048E+04  4.3160070E+04
  4.2698847E+04  4.2238401E+04  4.1778755E+04  4.1319933E+04
  4.0861958E+04  4.0404854E+04  3.9948643E+04  3.9493351E+04
  3.9039002E+04  3.8585618E+04  3.8133228E+04  3.7681853E+04
  3.7231521E+04  3.6782255E+04  3.6334083E+04  3.5887029E+04
  3.5441120E+04  3.4996381E+04  3.4552840E+04  3.4110523E+04
  3.3669458E+04  3.3229670E+04  3.2791189E+04  3.2354041E+04
  3.1918255E+04  3.1483858E+04  3.1050879E+04  3.0619347E+04
  3.0189291E+04  2.9760739E+04  2.9333721E+04  2.8908267E+04
  2.8484406E+04  2.8062168E+04  2.7641585E+04  2.7222685E+04
  2.6805500E+04  2.6390062E+04  2.5976400E+04  2.5564548E+04
  2.5154536E+04  2.4746396E+04  2.4340162E+04  2.3935864E+04
  2.3533536E+04  2.3133212E+04  2.2734923E+04  2.2338704E+04
  2.1944589E+04  2.1552611E+04  2.1162803E+04  2.0775203E+04
  2.0389842E+04  2.0006758E+04  1.9625984E+04  1.9247556E+04
  1.8871510E+04  1.8497882E+04  1.8126709E+04  1.7758025E+04
  1.7391869E+04  1.7028278E+04  1.6667288E+04  1.6308938E+04
  1.5953264E+04  1.5600304E+04  1.5250098E+04  1.4902683E+04
  1.4558099E+04  1.4216384E+04  1.3877578E+04  1.3541720E+04
  1.3208850E+04  1.2879008E+04  1.2552236E+04  1.2228571E+04
  1.1908057E+04  1.1590734E+04  1.1276644E+04  1.0965827E+04
  1.0658327E+04  1.0354185E+04  1.0053444E+04  9.7561463E+03
  9.4623353E+03  9.1720538E+03  8.8853460E+03  8.6022555E+03
  8.3228258E+03  8.0471010E+03  7.7751270E+03  7.5069480E+03
  7.2426092E+03  6.9821560E+03  6.7256341E+03  6.4730895E+03
  6.2245685E+03  5.9801177E+03  5.7397837E+03  5.5036137E+03
  5.2716551E+03  5.0439554E+03  4.8205627E+03  4.6015250E+03
  4.3868909E+03  4.1767092E+03  3.9710288E+03  3.7698992E+03
  3.5733697E+03  3.3814904E+03  3.1943114E+03  3.0118832E+03
  2.8342565E+03  2.6614822E+03  2.4936117E+03  2.3306966E+03
  2.1727886E+03  2.0199401E+03  1.8722033E+03  1.7296312E+03
  1.5922766E+03  1.4601928E+03  1.3334335E+03  1.2120526E+03
  1.0961041E+03  9.8564265E+02  8.8072290E+02  7.8139988E+02
  6.8772903E+02  5.9976593E+02  5.1756649E+02  4.4118695E+02
  3.7068383E+02  3.0611393E+02  2.4753436E+02  1.9500252E+02
  1.4857611E+02  1.0831314E+02  7.4271900E+01  4.6510982E+01
  2.5089283E+01  1.0065996E+01  1.5006167E+00 -1.4885352E+00
 -4.0520094E+00 -6.6127339E+00 -9.1706978E+00 -1.1725891E+01
 -1.4278302E+01 -1.6827920E+01 -1.9374736E+01 -2.1918737E+01
 -2.4459914E+01 -2.6998256E+01 -2.9533752E+01 -3.2066391E+01
 -3.4596163E+01 -3.7123057E+01 -3.9647062E+01 -4.2168167E+01
 -4.4686363E+01 -4.7201638E+01 -4.9713981E+01 -5.2223382E+01
 -5.4729830E+01 -5.7233315E+01 -5.9733826E+01 -6.2231351E+01
 -6.4725881E+01 -6.7217405E+01 -6.9705912E+01 -7.2191391E+01
 -7.4673832E+01 -7.7153220E+01 -7.9629555E+01 -8.2102815E+01
 -8.4573000E+01 -8.7040088E+01 -8.9504070E+01 -9.1964948E+01
 -9.4422690E+01 -9.6877305E+01 -9.9328778E+01 -1.0177709E+02
 -1.0422224E+02 -1.0666421E+02 -1.0910299E+02 -1.1153857E+02
 -1.1397094E+02 -1.1640009E+02 -1.1882602E+02 -1.2124870E+02
 -1.2366812E+02 -1.2608429E+02 -1.2849719E+02 -1.3090679E+02
 -1.3331310E+02 -1.3571611E+02 -1.3811580E+02 -1.4051216E+02
 -1.4290519E+02 -1.4529487E+02 -1.4768119E+02 -1.5006413E+02
 -1.5244370E+02 -1.5481988E+02 -1.5719266E+02 -1.5956202E+02
 -1.6192796E+02 -1.6429046E+02 -1.6664953E+02 -1.6900513E+02
 -1.7135727E+02 -1.7370593E+02 -1.7605111E+02 -1.7839279E+02
 -1.8073096E+02 -1.8306560E+02 -1.8539672E+02 -1.8772430E+02
 -1.9004834E+02 -1.9236880E+02 -1.9468569E+02 -1.9699900E+02
 -1.9930871E+02 -2.0161482E+02 -2.0391731E+02 -2.0621618E+02
 -2.0851142E+02 -2.1080300E+02 -2.1309092E+02 -2.1537518E+02
 -2.1765575E+02 -2.1993263E+02 -2.2220582E+02 -2.2447529E+02
 -2.2674104E+02 -2.2900306E+02 -2.3126133E+02 -2.3351585E+02
 -2.3576660E+02 -2.3801357E+02 -2.4025676E+02 -2.4249616E+02
 -2.4473174E+02 -2.4696350E+02 -2.4919145E+02 -2.5141554E+02
 -2.5363578E+02 -2.5585217E+02 -2.5806468E+02 -2.6027330E+02
 -2.6247804E+02 -2.6467887E+02 -2.6687579E+02 -2.6906878E+02
 -2.7125783E+02 -2.7344294E+02 -2.7562409E+02 -2.7780127E+02
 -2.7997447E+02 -2.8214368E+02 -2.8430889E+02 -2.8647009E+02
 -2.8862727E+02 -2.9078042E+02 -2.9292952E+02 -2.9507456E+02
 -2.9721555E+02 -2.9935246E+02 -3.0148528E+02 -3.0361400E+02
 -3.0573863E+02 -3.0785912E+02 -3.0997550E+02 -3.1208773E+02
 -3.1419581E+02 -3.1629973E+02 -3.1839948E+02 -3.2049505E+02
 -3.2258642E+02 -3.2467359E+02 -3.2675655E+02 -3.2883528E+02
 -3.3090977E+02 -3.3298003E+02 -3.3504602E+02 -3.3710774E+02
 -3.3916519E+02 -3.4121834E+02 -3.4326720E+02 -3.4531175E+02
 -3.4735198E+02 -3.4938787E+02 -3.5141942E+02 -3.5344662E+02
 -3.5546945E+02 -3.5748791E+02 -3.5950199E+02 -3.6151166E+02
 -3.6351694E+02 -3.6551779E+02 -3.6751421E+02 -3.6950620E+02
 -3.7149374E+02 -3.7347682E+02 -3.7545542E+02 -3.7742955E+02
 -3.7939918E+02 -3.8136431E+02 -3.8332493E+02 -3.8528102E+02
 -3.8723258E+02 -3.8917958E+02 -3.9112204E+02 -3.9305993E+02
 -3.9499324E+02 -3.9692196E+02 -3.9884609E+02 -4.0076560E+02
 -4.0268049E+02 -4.0459075E+02 -4.0649637E+02 -4.0839734E+02
 -4.1029364E+02 -4.1218527E+02 -4.1407221E+02 -4.1595446E+02
 -4.1783201E+02 -4.1970483E+02 -4.2157293E+02 -4.2343629E+02
 -4.2529490E+02 -4.2714875E+02 -4.2899784E+02 -4.3084214E+02
 -4.3268165E+02 -4.3451636E+02 -4.3634625E+02 -4.3817132E+02
 -4.3999156E+02 -4.4180696E+02 -4.4361749E+02 -4.4542316E+02
 -4.4722395E+02 -4.4901986E+02 -4.5081086E+02 -4.5259696E+02
 -4.5437814E+02 -4.5615439E+02 -4.5792569E+02 -4.5969205E+02
 -4.6145344E+02 -4.6320986E+02 -4.6496129E+02 -4.6670773E+02
 -4.6844916E+02 -4.7018558E+02 -4.7191697E+02 -4.7364332E+02
 -4.7536463E+02 -4.7708088E+02 -4.7879206E+02 -4.8049815E+02
 -4.8219916E+02 -4.8389507E+02 -4.8558586E+02 -4.8727153E+02
 -4.8895206E+02 -4.9062746E+02 -4.9229769E+02 -4.9396276E+02
 -4.9562266E+02 -4.9727736E+02 -4.9892687E+02 -5.0057117E+02
 -5.0221025E+02 -5.0384411E+02 -5.0547272E+02 -5.0709608E+02
 -5.0871418E+02 -5.1032700E+02 -5.1193454E+02 -5.1353680E+02
 -5.1513374E+02 -5.1672537E+02 -5.1831167E+02 -5.1989264E+02
 -5.2146825E+02 -5.2303851E+02 -5.2460341E+02 -5.2616291E+02
 -5.2771704E+02 -5.2926576E+02 -5.3080907E+02 -5.3234696E+02
 -5.3387941E+02 -5.3540642E+02 -5.3692798E+02 -5.3844407E+02
 -5.3995468E+02 -5.4145981E+02 -5.4295944E+02 -5.4445357E+02
 -5.4594217E+02 -5.4742525E+02 -5.4890279E+02 -5.5037477E+02
 -5.5184120E+02 -5.5330205E+02 -5.5475732E+02 -5.5620699E+02
 -5.5765106E+02 -5.5908953E+02 -5.6052236E+02 -5.6194955E+02
 -5.6337110E+02 -5.6478699E+02 -5.6619722E+02 -5.6760176E+02
 -5.6900062E+02 -5.7039377E+02 -5.7178122E+02 -5.7316294E+02
 -5.7453893E+02 -5.7590918E+02 -5.7727367E+02 -5.7863240E+02
 -5.7998536E+02 -5.8133252E+02 -5.8267390E+02 -5.8400947E+02
 -5.8533921E+02 -5.8666313E+02 -5.8798121E+02 -5.8929344E+02
 -5.9059981E+02 -5.9190031E+02 -5.9319493E+02 -5.9448365E+02
 -5.9576647E+02 -5.9704337E+02 -5.9831435E+02 -5.9957940E+02
 -6.0083850E+02 -6.0209165E+02 -6.0333882E+02 -6.0458002E+02
 -6.0581523E+02 -6.0704444E+02 -6.0826763E+02 -6.0948482E+02
 -6.1069596E+02 -6.1190107E+02 -6.1310012E+02 -6.1429310E+02
 -6.1548002E+02 -6.1666085E+02 -6.1783558E+02 -6.1900421E+02
 -6.2016671E+02 -6.2132309E+02 -6.2247333E+02 -6.2361743E+02
 -6.2475536E+02 -6.2588712E+02 -6.2701271E+02 -6.2813210E+02
 -6.2924528E+02 -6.3035225E+02 -6.3145301E+02 -6.3254752E+02
 -6.3363579E+02 -6.3471780E+02 -6.3579355E+02 -6.3686302E+02
 -6.3792620E+02 -6.3898308E+02 -6.4003365E+02 -6.4107791E+02
 -6.4211582E+02 -6.4314740E+02 -6.4417263E+02 -6.4519150E+02
 -6.4620398E+02 -6.4721009E+02 -6.4820981E+02 -6.4920311E+02
 -6.5019000E+02 -6.5117046E+02 -6.5214449E+02 -6.5311206E+02
 -6.5407318E+02 -6.5502782E+02 -6.5597599E+02 -6.5691766E+02
 -6.5785283E+02 -6.5878149E+02 -6.5970363E+02 -6.6061923E+02
 -6.6152829E+02 -6.6243079E+02 -6.6332672E+02 -6.6421609E+02
 -6.6509886E+02 -6.6597503E+02 -6.6684460E+02 -6.6770754E+02
 -6.6856385E+02 -6.6941353E+02 -6.7025655E+02 -6.7109291E+02
 -6.7192260E+02 -6.7274560E+02 -6.7356191E+02 -6.7437152E+02
 -6.7517440E+02 -6.7597056E+02 -6.7675999E+02 -6.7754267E+02
 -6.7831858E+02 -6.7908773E+02 -6.7985010E+02 -6.8060567E+02
 -6.8135445E+02 -6.8209642E+02 -6.8283156E+02 -6.8355987E+02
 -6.8428133E+02 -6.8499594E+02 -6.8570369E+02 -6.8640455E+02
 -6.8709854E+02 -6.8778563E+02 -6.8846580E+02 -6.8913905E+02
 -6.8980538E+02 -6.9046477E+02 -6.9111721E+02 -6.9176268E+02
 -6.9240119E+02 -6.9303270E+02 -6.9365723E+02 -6.9427475E+02
 -6.9488525E+02 -6.9548873E+02 -6.9608518E+02 -6.9667457E+02
 -6.9725691E+02 -6.9783218E+02 -6.9840038E+02 -6.9896147E+02
 -6.9951548E+02 -7.0006236E+02 -7.0060213E+02 -7.0113476E+02
 -7.0166025E+02 -7.0217859E+02 -7.0268976E+02 -7.0319376E+02
 -7.0369057E+02 -7.0418018E+02 -7.0466259E+02 -7.0513778E+02
 -7.0560574E+02 -7.0606646E+02 -7.0651992E+02 -7.0696613E+02
 -7.0740507E+02 -7.0783672E+02 -7.0826108E+02 -7.0867814E+02
 -7.0908788E+02 -7.0949030E+02 -7.0988538E+02 -7.1027312E+02
 -7.1065349E+02 -7.1102651E+02 -7.1139214E+02 -7.1175038E+02
 -7.1210122E+02 -7.1244465E+02 -7.1278067E+02 -7.1310924E+02
 -7.1343038E+02 -7.1374406E+02 -7.1405028E+02 -7.1434902E+02
 -7.1464028E+02 -7.1492405E+02 -7.1520030E+02 -7.1546903E+02
 -7.1573024E+02 -7.1598392E+02 -7.1623004E+02 -7.1646860E+02
 -7.1669959E+02 -7.1692299E+02 -7.1713881E+02 -7.1734702E+02
 -7.1754762E+02 -7.1774060E+02 -7.1792594E+02 -7.1810363E+02
 -7.1827366E+02 -7.1843603E+02 -7.1859072E+02 -7.1873773E+02
 -7.1887703E+02 -7.1900862E+02 -7.1913250E+02 -7.1924864E+02
 -7.1935704E+02 -7.1945768E+02 -7.1955057E+02 -7.1963568E+02
 -7.1971301E+02 -7.1978253E+02 -7.1984426E+02 -7.1989816E+02
 -7.1994424E+02 -7.1998248E+02 -7.2001287E+02 -7.2003540E+02
 -7.2005006E+02 -7.2005684E+02 -7.2005573E+02 -7.2004672E+02
 -7.2002979E+02 -7.2000494E+02 -7.1997216E+02 -7.1993143E+02
 -7.1988275E+02 -7.1982609E+02 -7.1976146E+02 -7.1968884E+02
 -7.1960822E+02 -7.1951960E+02 -7.1942296E+02 -7.1931828E+02
 -7.1920556E+02 -7.1908479E+02 -7.1895596E+02 -7.1881906E+02
 -7.1867407E+02 -7.1852098E+02 -7.1835979E+02 -7.1819048E+02
 -7.1801305E+02 -7.1782748E+02 -7.1763376E+02 -7.1743188E+02
 -7.1722184E+02 -7.1700361E+02 -7.1677719E+02 -7.1654257E+02
 -7.1629973E+02 -7.1604868E+02 -7.1578939E+02 -7.1552186E+02
 -7.1524607E+02 -7.1496201E+02 -7.1466968E+02 -7.1436906E+02
 -7.1406014E+02 -7.1374292E+02 -7.1341737E+02 -7.1308349E+02
 -7.1274128E+02 -7.1239071E+02 -7.1203178E+02 -7.1166449E+02
 -7.1128880E+02 -7.1090472E+02 -7.1051224E+02 -7.1011133E+02
 -7.0970201E+02 -7.0928425E+02 -7.0885804E+02 -7.0842337E+02
 -7.0798023E+02 -7.0752861E+02 -7.0706851E+02 -7.0659989E+02
 -7.0612277E+02 -7.0563713E+02 -7.0514296E+02 -7.0464024E+02
 -7.0412897E+02 -7.0360913E+02 -7.0308071E+02 -7.0254371E+02
 -7.0199811E+02 -7.0144390E+02 -7.0088108E+02 -7.0030962E+02
 -6.9972953E+02 -6.9914078E+02 -6.9854337E+02 -6.9793730E+02
 -6.9732253E+02 -6.9669908E+02 -6.9606692E+02 -6.9542604E+02
 -6.9477644E+02 -6.9411811E+02 -6.9345102E+02 -6.9277518E+02
 -6.9209057E+02 -6.9139719E+02 -6.9069501E+02 -6.8998403E+02
 -6.8926424E+02 -6.8853563E+02 -6.8779819E+02 -6.8705190E+02
 -6.8629676E+02 -6.8553276E+02 -6.8475988E+02 -6.8397812E+02
 -6.8318745E+02 -6.8238788E+02 -6.8157940E+02 -6.8076198E+02
 -6.7993562E+02 -6.7910032E+02 -6.7825605E+02 -6.7740281E+02
 -6.7654060E+02 -6.7566938E+02 -6.7478917E+02 -6.7389994E+02
 -6.7300169E+02 -6.7209440E+02 -6.7117806E+02 -6.7025267E+02
 -6.6931820E+02 -6.6837467E+02 -6.6742204E+02 -6.6646031E+02
 -6.6548947E+02 -6.6450951E+02 -6.6352042E+02 -6.6252218E+02
 -6.6151480E+02 -6.6049825E+02 -6.5947253E+02 -6.5843762E+02
 -6.5739350E+02 -6.5634020E+02 -6.5527766E+02 -6.5420591E+02
 -6.5312491E+02 -6.5203466E+02 -6.5093516E+02 -6.4982638E+02
 -6.4870832E+02 -6.4758097E+02 -6.4644432E+02 -6.4529835E+02
 -6.4414306E+02 -6.4297844E+02 -6.4180447E+02 -6.4062114E+02
 -6.3942845E+02 -6.3822637E+02 -6.3701491E+02 -6.3579405E+02
 -6.3456378E+02 -6.3332409E+02 -6.3207497E+02 -6.3081641E+02
 -6.2954840E+02 -6.2827092E+02 -6.2698397E+02 -6.2568753E+02
 -6.2438160E+02 -6.2306616E+02 -6.2174121E+02 -6.2040673E+02
 -6.1906271E+02 -6.1770914E+02 -6.1634601E+02 -6.1497332E+02
 -6.1359104E+02 -6.1219917E+02 -6.1079770E+02 -6.0938661E+02
 -6.0796591E+02 -6.0653556E+02 -6.0509558E+02 -6.0364593E+02
 -6.0218663E+02 -6.0071764E+02 -5.9923897E+02 -5.9775059E+02
 -5.9625251E+02 -5.9474471E+02 -5.9322719E+02 -5.9169991E+02
 -5.9015627E+02 -5.8861973E+02 -5.8708787E+02 -5.8556066E+02
 -5.8403807E+02 -5.8252010E+02 -5.8100674E+02 -5.7949796E+02
 -5.7799375E+02 -5.7649409E+02 -5.7499897E+02 -5.7350837E+02
 -5.7202227E+02 -5.7054067E+02 -5.6906354E+02 -5.6759087E+02
 -5.6612265E+02 -5.6465886E+02 -5.6319948E+02 -5.6174450E+02
 -5.6029390E+02 -5.5884767E+02 -5.5740579E+02 -5.5596825E+02
 -5.5453504E+02 -5.5310613E+02 -5.5168152E+02 -5.5026119E+02
 -5.4884512E+02 -5.4743330E+02 -5.4602571E+02 -5.4462235E+02
 -5.4322319E+02 -5.4182822E+02 -5.4043744E+02 -5.3905082E+02
 -5.3766833E+02 -5.3629000E+02 -5.3491577E+02 -5.3354566E+02
 -5.3217964E+02 -5.3081770E+02 -5.2945982E+02 -5.2810599E+02
 -5.2675620E+02 -5.2541043E+02 -5.2406867E+02 -5.2273091E+02
 -5.2139713E+02 -5.2006732E+02 -5.1874146E+02 -5.1741955E+02
 -5.1610156E+02 -5.1478749E+02 -5.1347732E+02 -5.1217104E+02
 -5.1086864E+02 -5.0957009E+02 -5.0827540E+02 -5.0698454E+02
 -5.0569751E+02 -5.0441429E+02 -5.0313486E+02 -5.0185922E+02
 -5.0058734E+02 -4.9931924E+02 -4.9805487E+02 -4.9679423E+02
 -4.9553732E+02 -4.9428413E+02 -4.9303462E+02 -4.9178879E+02
 -4.9054664E+02 -4.8930815E+02 -4.8807330E+02 -4.8684209E+02
 -4.8561450E+02 -4.8439052E+02 -4.8317014E+02 -4.8195334E+02
 -4.8074012E+02 -4.7953046E+02 -4.7832434E+02 -4.7712176E+02
 -4.7592272E+02 -4.7472719E+02 -4.7353515E+02 -4.7234661E+02
 -4.7116154E+02 -4.6997995E+02 -4.6880181E+02 -4.6762712E+02
 -4.6645585E+02 -4.6528801E+02 -4.6412357E+02 -4.6296254E+02
 -4.6180490E+02 -4.6065062E+02 -4.5949972E+02 -4.5835217E+02
 -4.5720795E+02 -4.5606707E+02 -4.5492951E+02 -4.5379526E+02
 -4.5266431E+02 -4.5153664E+02 -4.5041225E+02 -4.4929112E+02
 -4.4817326E+02 -4.4705863E+02 -4.4594723E+02 -4.4483906E+02
 -4.4373410E+02 -4.4263234E+02 -4.4153377E+02 -4.4043838E+02
 -4.3934616E+02 -4.3825709E+02 -4.3717118E+02 -4.3608841E+02
 -4.3500875E+02 -4.3393223E+02 -4.3285880E+02 -4.3178847E+02
 -4.3072123E+02 -4.2965707E+02 -4.2859597E+02 -4.2753792E+02
 -4.2648293E+02 -4.2543096E+02 -4.2438203E+02 -4.2333611E+02
 -4.2229319E+02 -4.2125328E+02 -4.2021635E+02 -4.1918240E+02
 -4.1815141E+02 -4.1712338E+02 -4.1609829E+02 -4.1507615E+02
 -4.1405693E+02 -4.1304063E+02 -4.1202725E+02 -4.1101676E+02
 -4.1000915E+02 -4.0900444E+02 -4.0800259E+02 -4.0700360E+02
 -4.0600747E+02 -4.0501418E+02 -4.0402373E+02 -4.0303610E+02
 -4.0205128E+02 -4.0106927E+02 -4.0009006E+02 -3.9911363E+02
 -3.9813998E+02 -3.9716911E+02 -3.9620099E+02 -3.9523563E+02
 -3.9427301E+02 -3.9331313E+02 -3.9235597E+02 -3.9140153E+02
 -3.9044979E+02 -3.8950076E+02 -3.8855441E+02 -3.8761074E+02
 -3.8666975E+02 -3.8573142E+02 -3.8479575E+02 -3.8386272E+02
 -3.8293233E+02 -3.8200457E+02 -3.8107944E+02 -3.8015692E+02
 -3.7923700E+02 -3.7831967E+02 -3.7740494E+02 -3.7649278E+02
 -3.7558319E+02 -3.7467617E+02 -3.7377170E+02 -3.7286978E+02
 -3.7197040E+02 -3.7107354E+02 -3.7017921E+02 -3.6928739E+02
 -3.6839808E+02 -3.6751127E+02 -3.6662694E+02 -3.6574509E+02
 -3.6486572E+02 -3.6398882E+02 -3.6311437E+02 -3.6224237E+02
 -3.6137282E+02 -3.6050570E+02 -3.5964101E+02 -3.5877872E+02
 -3.5791886E+02 -3.5706140E+02 -3.5620634E+02 -3.5535365E+02
 -3.5450336E+02 -3.5365544E+02 -3.5280988E+02 -3.5196668E+02
 -3.5112582E+02 -3.5028731E+02 -3.4945114E+02 -3.4861730E+02
 -3.4778577E+02 -3.4695656E+02 -3.4612965E+02 -3.4530504E+02
 -3.4448272E+02 -3.4366269E+02 -3.4284493E+02 -3.4202944E+02
 -3.4121621E+02 -3.4040525E+02 -3.3959652E+02 -3.3879004E+02
 -3.3798579E+02 -3.3718377E+02 -3.3638396E+02 -3.3558638E+02
 -3.3479099E+02 -3.3399780E+02 -3.3320681E+02 -3.3241800E+02
 -3.3163136E+02 -3.3084690E+02 -3.3006461E+02 -3.2928446E+02
 -3.2850647E+02 -3.2773063E+02 -3.2695692E+02 -3.2618534E+02
 -3.2541588E+02 -3.2464854E+02 -3.2388332E+02 -3.2312019E+02
 -3.2235916E+02 -3.2160023E+02 -3.2084337E+02 -3.2008859E+02
 -3.1933589E+02 -3.1858524E+02 -3.1783666E+02 -3.1709012E+02
 -3.1634564E+02 -3.1560319E+02 -3.1486277E+02 -3.1412438E+02
 -3.1338800E+02 -3.1265365E+02 -3.1192130E+02 -3.1119094E+02
 -3.1046258E+02 -3.0973622E+02 -3.0901183E+02 -3.0828941E+02
 -3.0756897E+02 -3.0685049E+02 -3.0613397E+02 -3.0541940E+02
 -3.0470678E+02 -3.0399609E+02 -3.0328733E+02 -3.0258051E+02
 -3.0187561E+02 -3.0117262E+02 -3.0047153E+02 -2.9977236E+02
 -2.9907508E+02 -2.9837969E+02 -2.9768619E+02 -2.9699456E+02
 -2.9630482E+02 -2.9561693E+02 -2.9493092E+02 -2.9424675E+02
 -2.9356445E+02 -2.9288398E+02 -2.9220535E+02 -2.9152856E+02
 -2.9085359E+02 -2.9018045E+02 -2.8950913E+02 -2.8883961E+02
 -2.8817190E+02 -2.8750600E+02 -2.8684188E+02 -2.8617956E+02
 -2.8551902E+02 -2.8486025E+02 -2.8420326E+02 -2.8354804E+02
 -2.8289458E+02 -2.8224287E+02 -2.8159292E+02 -2.8094471E+02
 -2.8029824E+02 -2.7965351E+02 -2.7901050E+02 -2.7836922E+02
 -2.7772966E+02 -2.7709181E+02 -2.7645567E+02 -2.7582124E+02
 -2.7518850E+02 -2.7455745E+02 -2.7392810E+02 -2.7330042E+02
 -2.7267442E+02 -2.7205010E+02 -2.7142744E+02 -2.7080644E+02
 -2.7018710E+02 -2.6956941E+02 -2.6895337E+02 -2.6833898E+02
 -2.6772621E+02 -2.6711508E+02 -2.6650558E+02 -2.6589770E+02
 -2.6529143E+02 -2.6468678E+02 -2.6408373E+02 -2.6348229E+02
 -2.6288244E+02 -2.6228419E+02 -2.6168753E+02 -2.6109245E+02
 -2.6049894E+02 -2.5990701E+02 -2.5931665E+02 -2.5872785E+02
 -2.5814061E+02 -2.5755492E+02 -2.5697079E+02 -2.5638820E+02
 -2.5580715E+02 -2.5522763E+02 -2.5464965E+02 -2.5407320E+02
 -2.5349826E+02 -2.5292485E+02 -2.5235294E+02 -2.5178255E+02
 -2.5121365E+02 -2.5064626E+02 -2.5008036E+02 -2.4951595E+02
 -2.4895303E+02 -2.4839159E+02 -2.4783162E+02 -2.4727313E+02
 -2.4671610E+02 -2.4616054E+02 -2.4560643E+02 -2.4505379E+02
 -2.4450259E+02 -2.4395283E+02 -2.4340452E+02 -2.4285765E+02
 -2.4231221E+02 -2.4176819E+02 -2.4122561E+02 -2.4068444E+02
 -2.4014469E+02 -2.3960635E+02 -2.3906942E+02 -2.3853389E+02
 -2.3799976E+02 -2.3746702E+02 -2.3693567E+02 -2.3640572E+02
 -2.3587714E+02 -2.3534994E+02 -2.3482412E+02 -2.3429966E+02
 -2.3377658E+02 -2.3325485E+02 -2.3273449E+02 -2.3221547E+02
 -2.3169781E+02 -2.3118149E+02 -2.3066651E+02 -2.3015288E+02
 -2.2964057E+02 -2.2912960E+02 -2.2861995E+02 -2.2811162E+02
 -2.2760462E+02 -2.2709892E+02 -2.2659453E+02 -2.2609145E+02
 -2.2558968E+02 -2.2508921E+02 -2.2459003E+02 -2.2409213E+02
 -2.2359553E+02 -2.2310021E+02 -2.2260617E+02 -2.2211341E+02
 -2.2162192E+02 -2.2113170E+02 -2.2064273E+02 -2.2015504E+02
 -2.1966860E+02 -2.1918341E+02 -2.1869947E+02 -2.1821678E+02
 -2.1773533E+02 -2.1725512E+02 -2.1677615E+02 -2.1629840E+02
 -2.1582189E+02 -2.1534659E+02 -2.1487253E+02 -2.1439967E+02
 -2.1392804E+02 -2.1345761E+02 -2.1298838E+02 -2.1252036E+02
 -2.1205354E+02 -2.1158792E+02 -2.1112348E+02 -2.1066023E+02
 -2.1019818E+02 -2.0973730E+02 -2.0927760E+02 -2.0881908E+02
 -2.0836173E+02 -2.0790554E+02 -2.0745053E+02 -2.0699667E+02
 -2.0654397E+02 -2.0609243E+02 -2.0564204E+02 -2.0519279E+02
 -2.0474469E+02 -2.0429773E+02 -2.0385191E+02 -2.0340722E+02
 -2.0296367E+02 -2.0252124E+02 -2.0207993E+02 -2.0163975E+02
 -2.0120069E+02 -2.0076275E+02 -2.0032591E+02 -1.9989018E+02
 -1.9945556E+02 -1.9902203E+02 -1.9858961E+02 -1.9815829E+02
 -1.9772806E+02 -1.9729892E+02 -1.9687085E+02 -1.9644388E+02
 -1.9601798E+02 -1.9559317E+02 -1.9516943E+02 -1.9474675E+02
 -1.9432514E+02 -1.9390460E+02 -1.9348513E+02 -1.9306670E+02
 -1.9264934E+02 -1.9223303E+02 -1.9181776E+02 -1.9140354E+02
 -1.9099037E+02 -1.9057823E+02 -1.9016713E+02 -1.8975707E+02
 -1.8934804E+02 -1.8894003E+02 -1.8853305E+02 -1.8812710E+02
 -1.8772216E+02 -1.8731824E+02 -1.8691533E+02 -1.8651344E+02
 -1.8611255E+02 -1.8571266E+02 -1.8531378E+02 -1.8491590E+02
 -1.8451901E+02 -1.8412312E+02 -1.8372822E+02 -1.8333431E+02
 -1.8294137E+02 -1.8254943E+02 -1.8215846E+02 -1.8176847E+02
 -1.8137945E+02 -1.8099140E+02 -1.8060433E+02 -1.8021821E+02
 -1.7983307E+02 -1.7944887E+02 -1.7906564E+02 -1.7868336E+02
 -1.7830204E+02 -1.7792166E+02 -1.7754223E+02 -1.7716374E+02
 -1.7678619E+02 -1.7640959E+02 -1.7603391E+02 -1.7565917E+02
 -1.7528537E+02 -1.7491248E+02 -1.7454053E+02 -1.7416949E+02
 -1.7379938E+02 -1.7343018E+02 -1.7306190E+02 -1.7269453E+02
 -1.7232807E+02 -1.7196251E+02 -1.7159787E+02 -1.7123412E+02
 -1.7087127E+02 -1.7050932E+02 -1.7014826E+02 -1.6978810E+02
 -1.6942882E+02 -1.6907043E+02 -1.6871293E+02 -1.6835630E+02
 -1.6800056E+02 -1.6764569E+02 -1.6729169E+02 -1.6693857E+02
 -1.6658632E+02 -1.6623494E+02 -1.6588442E+02 -1.6553475E+02
 -1.6518596E+02 -1.6483801E+02 -1.6449092E+02 -1.6414469E+02
 -1.6379930E+02 -1.6345476E+02 -1.6311107E+02 -1.6276822E+02
 -1.6242621E+02 -1.6208504E+02 -1.6174470E+02 -1.6140520E+02
 -1.6106653E+02 -1.6072868E+02 -1.6039167E+02 -1.6005548E+02
 -1.5972011E+02 -1.5938555E+02 -1.5905183E+02 -1.5871890E+02
 -1.5838680E+02 -1.5805550E+02 -1.5772502E+02 -1.5739534E+02
 -1.5706646E+02 -1.5673838E+02 -1.5641111E+02 -1.5608462E+02
 -1.5575894E+02 -1.5543405E+02 -1.5510995E+02 -1.5478663E+02
 -1.5446411E+02 -1.5414236E+02 -1.5382139E+02 -1.5350121E+02
 -1.5318181E+02 -1.5286318E+02 -1.5254532E+02 -1.5222823E+02
 -1.5191192E+02 -1.5159636E+02 -1.5128157E+02 -1.5096755E+02
 -1.5065429E+02 -1.5034178E+02 -1.5003003E+02 -1.4971903E+02
 -1.4940878E+02 -1.4909929E+02 -1.4879054E+02 -1.4848254E+02
 -1.4817528E+02 -1.4786876E+02 -1.4756299E+02 -1.4725795E+02
 -1.4695364E+02 -1.4665007E+02 -1.4634724E+02 -1.4604512E+02
 -1.4574374E+02 -1.4544308E+02 -1.4514315E+02 -1.4484394E+02
 -1.4454545E+02 -1.4424767E+02 -1.4395061E+02 -1.4365426E+02
 -1.4335862E+02 -1.4306370E+02 -1.4276948E+02 -1.4247597E+02
 -1.4218316E+02 -1.4189105E+02 -1.4159965E+02 -1.4130893E+02
 -1.4101892E+02 -1.4072960E+02 -1.4044098E+02 -1.4015304E+02
 -1.3986579E+02 -1.3957923E+02 -1.3929335E+02 -1.3900817E+02
 -1.3872365E+02 -1.3843982E+02 -1.3815666E+02 -1.3787418E+02
 -1.3759238E+02 -1.3731124E+02 -1.3703077E+02 -1.3675097E+02
 -1.3647185E+02 -1.3619338E+02 -1.3591557E+02 -1.3563843E+02
 -1.3536194E+02 -1.3508612E+02 -1.3481095E+02 -1.3453643E+02
 -1.3426256E+02 -1.3398935E+02 -1.3371678E+02 -1.3344486E+02
 -1.3317359E+02 -1.3290296E+02 -1.3263296E+02 -1.3236362E+02
 -1.3209490E+02 -1.3182683E+02 -1.3155938E+02 -1.3129257E+02
 -1.3102640E+02 -1.3076084E+02 -1.3049592E+02 -1.3023163E+02
 -1.2996796E+02 -1.2970491E+02 -1.2944248E+02 -1.2918068E+02
 -1.2891948E+02 -1.2865891E+02 -1.2839894E+02 -1.2813960E+02
 -1.2788086E+02 -1.2762273E+02 -1.2736521E+02 -1.2710830E+02
 -1.2685199E+02 -1.2659628E+02 -1.2634118E+02 -1.2608667E+02
 -1.2583277E+02 -1.2557945E+02 -1.2532673E+02 -1.2507461E+02
 -1.2482308E+02 -1.2457214E+02 -1.2432178E+02 -1.2407201E+02
 -1.2382283E+02 -1.2357423E+02 -1.2332621E+02 -1.2307878E+02
 -1.2283193E+02 -1.2258564E+02 -1.2233994E+02 -1.2209481E+02
 -1.2185025E+02 -1.2160627E+02 -1.2136286E+02 -1.2112001E+02
 -1.2087773E+02 -1.2063601E+02 -1.2039486E+02 -1.2015427E+02
 -1.1991424E+02 -1.1967477E+02 -1.1943586E+02 -1.1919751E+02
 -1.1895971E+02 -1.1872246E+02 -1.1848577E+02 -1.1824962E+02
 -1.1801402E+02 -1.1777897E+02 -1.1754447E+02 -1.1731052E+02
 -1.1707710E+02 -1.1684423E+02 -1.1661189E+02 -1.1638010E+02
 -1.1614884E+02 -1.1591812E+02 -1.1568794E+02 -1.1545828E+02
 -1.1522916E+02 -1.1500057E+02 -1.1477250E+02 -1.1454497E+02
 -1.1431796E+02 -1.1409148E+02 -1.1386551E+02 -1.1364008E+02
 -1.1341516E+02 -1.1319076E+02 -1.1296688E+02 -1.1274351E+02
 -1.1252066E+02 -1.1229833E+02 -1.1207650E+02 -1.1185519E+02
 -1.1163439E+02 -1.1141409E+02 -1.1119430E+02 -1.1097502E+02
 -1.1075624E+02 -1.1053797E+02 -1.1032019E+02 -1.1010293E+02
 -1.0988615E+02 -1.0966988E+02 -1.0945409E+02 -1.0923881E+02
 -1.0902402E+02 -1.0880972E+02 -1.0859591E+02 -1.0838260E+02
 -1.0816977E+02 -1.0795743E+02 -1.0774558E+02 -1.0753421E+02
 -1.0732332E+02 -1.0711292E+02 -1.0690300E+02 -1.0669355E+02
 -1.0648459E+02 -1.0627610E+02 -1.0606809E+02 -1.0586056E+02
 -1.0565349E+02 -1.0544690E+02 -1.0524079E+02 -1.0503514E+02
 -1.0482996E+02 -1.0462524E+02 -1.0442100E+02 -1.0421722E+02
 -1.0401390E+02 -1.0381104E+02 -1.0360865E+02 -1.0340672E+02
 -1.0320524E+02 -1.0300423E+02 -1.0280366E+02 -1.0260356E+02
 -1.0240391E+02 -1.0220471E+02 -1.0200597E+02 -1.0180768E+02
 -1.0160983E+02 -1.0141244E+02 -1.0121549E+02 -1.0101899E+02
 -1.0082292E+02 -1.0062731E+02 -1.0043214E+02 -1.0023741E+02
 -1.0004312E+02 -9.9849270E+01 -9.9655853E+01 -9.9462878E+01
 -9.9270338E+01 -9.9078233E+01 -9.8886563E+01 -9.8695320E+01
 -9.8504513E+01 -9.8314140E+01 -9.8124188E+01 -9.7934670E+01
 -9.7745573E+01 -9.7556910E+01 -9.7368668E+01 -9.7180845E+01
 -9.6993450E+01 -9.6806475E+01 -9.6619920E+01 -9.6433785E+01
 -9.6248063E+01 -9.6062768E+01 -9.5877885E+01 -9.5693415E+01
 -9.5509358E+01 -9.5325713E+01 -9.5142488E+01 -9.4959668E+01
 -9.4777253E+01 -9.4595250E+01 -9.4413660E+01 -9.4232475E+01
 -9.4051688E+01 -9.3871313E+01 -9.3691343E+01 -9.3511770E+01
 -9.3332595E+01 -9.3153833E+01 -9.2975460E+01 -9.2797485E+01
 -9.2619915E+01 -9.2442735E+01 -9.2265953E+01 -9.2089560E+01
 -9.1913565E+01 -9.1737968E+01 -9.1562753E+01 -9.1387935E+01
 -9.1213500E+01 -9.1039455E+01 -9.0865800E+01 -9.0692528E+01
 -9.0519645E+01 -9.0347145E+01 -9.0175028E+01 -9.0003293E+01
 -8.9831940E+01 -8.9660963E+01 -8.9490375E+01 -8.9320155E+01
 -8.9150318E+01 -8.8980863E+01 -8.8811775E+01 -8.8643063E+01
 -8.8474733E+01 -8.8306770E+01 -8.8139175E+01 -8.7971955E+01
 -8.7805103E+01 -8.7638625E+01 -8.7472508E+01 -8.7306765E+01
 -8.7141383E+01 -8.6976368E+01 -8.6811720E+01 -8.6647433E+01
 -8.6483505E+01 -8.6319945E+01 -8.6156745E+01 -8.5993905E+01
 -8.5831418E+01 -8.5669298E+01 -8.5507530E+01 -8.5346115E+01
 -8.5185060E+01 -8.5024365E+01 -8.4864015E+01 -8.4704018E+01
 -8.4544373E+01 -8.4385080E+01 -8.4226140E+01 -8.4067545E+01
 -8.3909303E+01 -8.3751405E+01 -8.3593853E+01 -8.3436653E+01
 -8.3279790E+01 -8.3123273E+01 -8.2967100E+01 -8.2811273E+01
 -8.2655783E+01 -8.2500630E+01 -8.2345823E+01 -8.2191353E+01
 -8.2037220E+01 -8.1883418E+01 -8.1729960E+01 -8.1576840E+01
 -8.1424050E+01 -8.1271590E+01 -8.1119468E+01 -8.0967683E+01
 -8.0816220E+01 -8.0665088E+01 -8.0514293E+01 -8.0363820E+01
 -8.0213678E+01 -8.0063865E+01 -7.9914375E+01 -7.9765208E+01
 -7.9616370E+01 -7.9467855E+01 -7.9319663E+01 -7.9171793E+01
 -7.9024245E+01 -7.8877020E+01 -7.8730110E+01 -7.8583523E+01
 -7.8437258E+01 -7.8291300E+01 -7.8145665E+01 -7.8000345E+01
 -7.7855340E+01 -7.7710650E+01 -7.7566275E+01 -7.7422215E+01
 -7.7278463E+01 -7.7135018E+01 -7.6991888E+01 -7.6849073E+01
 -7.6706558E+01 -7.6564358E+01 -7.6422465E+01 -7.6280873E+01
 -7.6139588E+01 -7.5998610E+01 -7.5857940E+01 -7.5717570E+01
 -7.5577508E+01 -7.5437738E+01 -7.5298275E+01 -7.5159113E+01
 -7.5020250E+01 -7.4881691E+01 -7.4743427E+01 -7.4605460E+01
 -7.4467790E+01 -7.4330417E+01 -7.4193339E+01 -7.4056556E+01
 -7.3920068E+01 -7.3783872E+01 -7.3647970E+01 -7.3512359E+01
 -7.3377039E+01 -7.3242011E+01 -7.3107271E+01 -7.2972821E+01
 -7.2838659E+01 -7.2704786E+01 -7.2571198E+01 -7.2437897E+01
 -7.2304882E+01 -7.2172152E+01 -7.2039706E+01 -7.1907543E+01
 -7.1775663E+01 -7.1644065E+01 -7.1512749E+01 -7.1381713E+01
 -7.1250957E+01 -7.1120481E+01 -7.0990283E+01 -7.0860364E+01
 -7.0730721E+01 -7.0601356E+01 -7.0472266E+01 -7.0343452E+01
 -7.0214912E+01 -7.0086646E+01 -6.9958653E+01 -6.9830933E+01
 -6.9703485E+01 -6.9576308E+01 -6.9449402E+01 -6.9322766E+01
 -6.9196399E+01 -6.9070301E+01 -6.8944471E+01 -6.8818908E+01
 -6.8693612E+01 -6.8568582E+01 -6.8443817E+01 -6.8319317E+01
 -6.8195081E+01 -6.8071109E+01 -6.7947400E+01 -6.7823953E+01
 -6.7700767E+01 -6.7577843E+01 -6.7455178E+01 -6.7332773E+01
 -6.7210628E+01 -6.7088741E+01 -6.6967112E+01 -6.6845739E+01
 -6.6724624E+01 -6.6603764E+01 -6.6483160E+01 -6.6362810E+01
 -6.6242714E+01 -6.6122873E+01 -6.6003284E+01 -6.5883947E+01
 -6.5764861E+01 -6.5646027E+01 -6.5527443E+01 -6.5409109E+01
 -6.5291024E+01 -6.5173188E+01 -6.5055600E+01 -6.4938260E+01
 -6.4821166E+01 -6.4704318E+01 -6.4587716E+01 -6.4471360E+01
 -6.4355248E+01 -6.4239379E+01 -6.4123754E+01 -6.4008372E+01
 -6.3893231E+01 -6.3778333E+01 -6.3663675E+01 -6.3549258E+01
 -6.3435080E+01 -6.3321143E+01 -6.3207443E+01 -6.3093982E+01
 -6.2980758E+01 -6.2867771E+01 -6.2755021E+01 -6.2642506E+01
 -6.2530227E+01 -6.2418182E+01 -6.2306372E+01 -6.2194795E+01
 -6.2083451E+01 -6.1972340E+01 -6.1861460E+01 -6.1750813E+01
 -6.1640396E+01 -6.1530209E+01 -6.1420251E+01 -6.1310523E+01
 -6.1201024E+01 -6.1091753E+01 -6.0982709E+01 -6.0873893E+01
 -6.0765302E+01 -6.0656938E+01 -6.0548799E+01 -6.0440885E+01
 -6.0333195E+01 -6.0225729E+01 -6.0118487E+01 -6.0011466E+01
 -5.9904668E+01 -5.9798093E+01 -5.9691737E+01 -5.9585603E+01
 -5.9479689E+01 -5.9373995E+01 -5.9268518E+01 -5.9163262E+01
 -5.9058223E+01 -5.8953401E+01 -5.8848797E+01 -5.8744409E+01
 -5.8640237E+01 -5.8536280E+01 -5.8432538E+01 -5.8329011E+01
 -5.8225697E+01 -5.8122597E+01 -5.8019711E+01 -5.7917036E+01
 -5.7814573E+01 -5.7712322E+01 -5.7610282E+01 -5.7508451E+01
 -5.7406832E+01 -5.7305421E+01 -5.7204220E+01 -5.7103226E+01
 -5.7002441E+01 -5.6901863E+01 -5.6801492E+01 -5.6701328E+01
 -5.6601370E+01 -5.6501618E+01 -5.6402070E+01 -5.6302727E+01
 -5.6203588E+01 -5.6104652E+01 -5.6005920E+01 -5.5907390E+01
 -5.5809062E+01 -5.5710937E+01 -5.5613012E+01 -5.5515289E+01
 -5.5417765E+01 -5.5320441E+01 -5.5223317E+01 -5.5126391E+01
 -5.5029665E+01 -5.4933135E+01 -5.4836804E+01 -5.4740669E+01
 -5.4644731E+01 -5.4548989E+01 -5.4453443E+01 -5.4358091E+01
 -5.4262935E+01 -5.4167973E+01 -5.4073205E+01 -5.3978630E+01
 -5.3884248E+01 -5.3790059E+01 -5.3696061E+01 -5.3602255E+01
 -5.3508641E+01 -5.3415216E+01 -5.3321983E+01 -5.3228939E+01
 -5.3136084E+01 -5.3043418E+01 -5.2950941E+01 -5.2858652E+01
 -5.2766550E+01 -5.2674635E+01 -5.2582908E+01 -5.2491367E+01
 -5.2400011E+01 -5.2308841E+01 -5.2217856E+01 -5.2127055E+01
 -5.2036439E+01 -5.1946007E+01 -5.1855758E+01 -5.1765691E+01
 -5.1675807E+01 -5.1586105E+01 -5.1496585E+01 -5.1407246E+01
 -5.1318087E+01 -5.1229109E+01 -5.1140311E+01 -5.1051692E+01
 -5.0963253E+01 -5.0874992E+01 -5.0786909E+01 -5.0699005E+01
 -5.0611278E+01 -5.0523728E+01 -5.0436354E+01 -5.0349157E+01
 -5.0262136E+01 -5.0175290E+01 -5.0088619E+01 -5.0002122E+01
 -4.9915800E+01 -4.9829651E+01 -4.9743677E+01 -4.9657875E+01
 -4.9572245E+01 -4.9486788E+01 -4.9401503E+01 -4.9316390E+01
 -4.9231447E+01 -4.9146674E+01 -4.9062072E+01 -4.8977640E+01
 -4.8893378E+01 -4.8809285E+01 -4.8725360E+01 -4.8641603E+01
 -4.8558014E+01 -4.8474593E+01 -4.8391340E+01 -4.8308252E+01
 -4.8225332E+01 -4.8142577E+01 -4.8059988E+01 -4.7977564E+01
 -4.7895305E+01 -4.7813210E+01 -4.7731280E+01 -4.7649513E+01
 -4.7567910E+01 -4.7486470E+01 -4.7405192E+01 -4.7324077E+01
 -4.7243123E+01 -4.7162331E+01 -4.7081701E+01 -4.7001230E+01
 -4.6920921E+01 -4.6840772E+01 -4.6760781E+01 -4.6680951E+01
 -4.6601279E+01 -4.6521766E+01 -4.6442411E+01 -4.6363214E+01
 -4.6284175E+01 -4.6205293E+01 -4.6126568E+01 -4.6047998E+01
 -4.5969585E+01 -4.5891328E+01 -4.5813227E+01 -4.5735280E+01
 -4.5657488E+01 -4.5579850E+01 -4.5502366E+01 -4.5425036E+01
 -4.5347859E+01 -4.5270835E+01 -4.5193964E+01 -4.5117245E+01
 -4.5040677E+01 -4.4964262E+01 -4.4887997E+01 -4.4811884E+01
 -4.4735921E+01 -4.4660108E+01 -4.4584445E+01 -4.4508931E+01
 -4.4433567E+01 -4.4358351E+01 -4.4283284E+01 -4.4208365E+01
 -4.4133594E+01 -4.4058971E+01 -4.3984495E+01 -4.3910165E+01
 -4.3835982E+01 -4.3761945E+01 -4.3688054E+01 -4.3614309E+01
 -4.3540709E+01 -4.3467253E+01 -4.3393942E+01 -4.3320776E+01
 -4.3247753E+01 -4.3174874E+01 -4.3102138E+01 -4.3029545E+01
 -4.2957094E+01 -4.2884786E+01 -4.2812620E+01 -4.2740595E+01
 -4.2668712E+01 -4.2596969E+01 -4.2525368E+01 -4.2453907E+01
 -4.2382586E+01 -4.2311405E+01 -4.2240362E+01 -4.2169460E+01
 -4.2098696E+01 -4.2028070E+01 -4.1957583E+01 -4.1887233E+01
 -4.1817021E+01 -4.1746947E+01 -4.1677010E+01 -4.1607209E+01
 -4.1537543E+01 -4.1468015E+01 -4.1398622E+01 -4.1329365E+01
 -4.1260243E+01 -4.1191255E+01 -4.1122402E+01 -4.1053684E+01
 -4.0985099E+01 -4.0916648E+01 -4.0848330E+01 -4.0780145E+01
 -4.0712093E+01 -4.0644174E+01 -4.0576386E+01 -4.0508731E+01
 -4.0441207E+01 -4.0373814E+01 -4.0306553E+01 -4.0239422E+01
 -4.0172421E+01 -4.0105551E+01 -4.0038810E+01 -3.9972199E+01
 -3.9905717E+01 -3.9839365E+01 -3.9773141E+01 -3.9707045E+01
 -3.9641077E+01 -3.9575237E+01 -3.9509525E+01 -3.9443940E+01
 -3.9378482E+01 -3.9313151E+01 -3.9247946E+01 -3.9182867E+01
 -3.9117914E+01 -3.9053087E+01 -3.8988384E+01 -3.8923808E+01
 -3.8859355E+01 -3.8795027E+01 -3.8730824E+01 -3.8666744E+01
 -3.8602788E+01 -3.8538956E+01 -3.8475246E+01 -3.8411659E+01
 -3.8348195E+01 -3.8284853E+01 -3.8221634E+01 -3.8158535E+01
 -3.8095559E+01 -3.8032703E+01 -3.7969970E+01 -3.7907356E+01
 -3.7844862E+01 -3.7782489E+01 -3.7720236E+01 -3.7658102E+01
 -3.7596089E+01 -3.7534193E+01 -3.7472417E+01 -3.7410760E+01
 -3.7349220E+01 -3.7287799E+01 -3.7226496E+01 -3.7165310E+01
 -3.7104242E+01 -3.7043290E+01 -3.6982455E+01 -3.6921737E+01
 -3.6861135E+01 -3.6800649E+01 -3.6740279E+01 -3.6680024E+01
 -3.6619885E+01 -3.6559861E+01 -3.6499951E+01 -3.6440156E+01
 -3.6380475E+01 -3.6320908E+01 -3.6261455E+01 -3.6202115E+01
 -3.6142889E+01 -3.6083776E+01 -3.6024775E+01 -3.5965887E+01
 -3.5907111E+01 -3.5848448E+01 -3.5789895E+01 -3.5731455E+01
 -3.5673126E+01 -3.5614908E+01 -3.5556800E+01 -3.5498804E+01
 -3.5440918E+01 -3.5383142E+01 -3.5325475E+01 -3.5267918E+01
 -3.5210471E+01 -3.5153132E+01 -3.5095903E+01 -3.5038783E+01
 -3.4981770E+01 -3.4924866E+01 -3.4868070E+01 -3.4811382E+01
 -3.4754801E+01 -3.4698327E+01 -3.4641961E+01 -3.4585701E+01
 -3.4529548E+01 -3.4473501E+01 -3.4417560E+01 -3.4361726E+01
 -3.4305996E+01 -3.4250372E+01 -3.4194854E+01 -3.4139440E+01
 -3.4084131E+01 -3.4028927E+01 -3.3973826E+01 -3.3918830E+01
 -3.3863938E+01 -3.3809150E+01 -3.3754464E+01 -3.3699882E+01
 -3.3645403E+01 -3.3591027E+01 -3.3536753E+01 -3.3482582E+01
 -3.3428512E+01 -3.3374544E+01 -3.3320678E+01 -3.3266913E+01
 -3.3213250E+01 -3.3159687E+01 -3.3106226E+01 -3.3052864E+01
 -3.2999603E+01 -3.2946443E+01 -3.2893382E+01 -3.2840420E+01
 -3.2787558E+01 -3.2734796E+01 -3.2682132E+01 -3.2629568E+01
 -3.2577101E+01 -3.2524733E+01 -3.2472464E+01 -3.2420292E+01
 -3.2368219E+01 -3.2316242E+01 -3.2264363E+01 -3.2212582E+01
 -3.2160897E+01 -3.2109308E+01 -3.2057817E+01 -3.2006422E+01
 -3.1955123E+01 -3.1903919E+01 -3.1852811E+01 -3.1801799E+01
 -3.1750883E+01 -3.1700061E+01 -3.1649334E+01 -3.1598702E+01
 -3.1548164E+01 -3.1497721E+01 -3.1447372E+01 -3.1397116E+01
 -3.1346954E+01 -3.1296886E+01 -3.1246911E+01 -3.1197029E+01
 -3.1147240E+01 -3.1097543E+01 -3.1047939E+01 -3.0998428E+01
 -3.0949008E+01 -3.0899681E+01 -3.0850445E+01 -3.0801300E+01
 -3.0752247E+01 -3.0703285E+01 -3.0654414E+01 -3.0605633E+01
 -3.0556943E+01 -3.0508344E+01 -3.0459835E+01 -3.0411416E+01
 -3.0363086E+01 -3.0314846E+01 -3.0266695E+01 -3.0218633E+01
 -3.0170661E+01 -3.0122777E+01 -3.0074983E+01 -3.0027276E+01
 -2.9979658E+01 -2.9932128E+01 -2.9884685E+01 -2.9837331E+01
 -2.9790064E+01 -2.9742884E+01 -2.9695792E+01 -2.9648786E+01
 -2.9601867E+01 -2.9555035E+01 -2.9508289E+01 -2.9461630E+01
 -2.9415056E+01 -2.9368568E+01 -2.9322167E+01 -2.9275850E+01
 -2.9229619E+01 -2.9183473E+01 -2.9137412E+01 -2.9091436E+01
 -2.9045544E+01 -2.8999737E+01 -2.8954014E+01 -2.8908376E+01
 -2.8862821E+01 -2.8817349E+01 -2.8771962E+01 -2.8726658E+01
 -2.8681436E+01 -2.8636298E+01 -2.8591244E+01 -2.8546271E+01
 -2.8501381E+01 -2.8456574E+01 -2.8411848E+01 -2.8367204E+01
 -2.8322643E+01 -2.8278163E+01 -2.8233764E+01 -2.8189447E+01
 -2.8145211E+01 -2.8101056E+01 -2.8056982E+01 -2.8012988E+01
 -2.7969075E+01 -2.7925242E+01 -2.7881489E+01 -2.7837816E+01
 -2.7794223E+01 -2.7750710E+01 -2.7707276E+01 -2.7663921E+01
 -2.7620645E+01 -2.7577449E+01 -2.7534331E+01 -2.7491291E+01
 -2.7448331E+01 -2.7405449E+01 -2.7362645E+01 -2.7319918E+01
 -2.7277269E+01 -2.7234698E+01 -2.7192206E+01 -2.7149789E+01
 -2.7107450E+01 -2.7065189E+01 -2.7023003E+01 -2.6980895E+01
 -2.6938864E+01 -2.6896908E+01 -2.6855029E+01 -2.6813226E+01
 -2.6771498E+01 -2.6729847E+01 -2.6688272E+01 -2.6646771E+01
 -2.6605346E+01 -2.6563995E+01 -2.6522720E+01 -2.6481520E+01
 -2.6440394E+01 -2.6399343E+01 -2.6358366E+01 -2.6317463E+01
 -2.6276635E+01 -2.6235880E+01 -2.6195199E+01 -2.6154592E+01
 -2.6114057E+01 -2.6073597E+01 -2.6033210E+01 -2.5992895E+01
 -2.5952653E+01 -2.5912484E+01 -2.5872387E+01 -2.5832363E+01
 -2.5792410E+01 -2.5752530E+01 -2.5712723E+01 -2.5672986E+01
 -2.5633322E+01 -2.5593728E+01 -2.5554206E+01 -2.5514756E+01
 -2.5475376E+01 -2.5436067E+01 -2.5396829E+01 -2.5357661E+01
 -2.5318565E+01 -2.5279538E+01 -2.5240581E+01 -2.5201695E+01
 -2.5162878E+01 -2.5124132E+01 -2.5085454E+01 -2.5046846E+01
 -2.5008308E+01 -2.4969838E+01 -2.4931438E+01 -2.4893106E+01
 -2.4854843E+01 -2.4816650E+01 -2.4778524E+01 -2.4740466E+01
 -2.4702477E+01 -2.4664556E+01 -2.4626703E+01 -2.4588917E+01
 -2.4551199E+01 -2.4513549E+01 -2.4475966E+01 -2.4438450E+01
 -2.4401001E+01 -2.4363620E+01 -2.4326305E+01 -2.4289056E+01
 -2.4251874E+01 -2.4214759E+01 -2.4177710E+01 -2.4140726E+01
 -2.4103809E+01 -2.4066958E+01 -2.4030173E+01 -2.3993453E+01
 -2.3956798E+01 -2.3920209E+01 -2.3883685E+01 -2.3847226E+01
 -2.3810831E+01 -2.3774502E+01 -2.3738237E+01 -2.3702038E+01
 -2.3665902E+01 -2.3629830E+01 -2.3593823E+01 -2.3557880E+01
 -2.3522000E+01 -2.3486184E+01 -2.3450432E+01 -2.3414744E+01
 -2.3379119E+01 -2.3343556E+01 -2.3308057E+01 -2.3272621E+01
 -2.3237248E+01 -2.3201937E+01 -2.3166689E+01 -2.3131504E+01
 -2.3096381E+01 -2.3061320E+01 -2.3026322E+01 -2.2991384E+01
 -2.2956509E+01 -2.2921696E+01 -2.2886944E+01 -2.2852254E+01
 -2.2817625E+01 -2.2783057E+01 -2.2748550E+01 -2.2714105E+01
 -2.2679720E+01 -2.2645396E+01 -2.2611132E+01 -2.2576929E+01
 -2.2542786E+01 -2.2508703E+01 -2.2474681E+01 -2.2440719E+01
 -2.2406816E+01 -2.2372973E+01 -2.2339190E+01 -2.2305466E+01
 -2.2271801E+01 -2.2238196E+01 -2.2204650E+01 -2.2171163E+01
 -2.2137735E+01 -2.2104366E+01 -2.2071056E+01 -2.2037804E+01
 -2.2004610E+01 -2.1971474E+01 -2.1938397E+01 -2.1905378E+01
 -2.1872417E+01 -2.1839514E+01 -2.1806669E+01 -2.1773881E+01
 -2.1741150E+01 -2.1708477E+01 -2.1675862E+01 -2.1643303E+01
 -2.1610802E+01 -2.1578357E+01 -2.1545969E+01 -2.1513638E+01
 -2.1481364E+01 -2.1449146E+01 -2.1416984E+01 -2.1384878E+01
 -2.1352829E+01 -2.1320836E+01 -2.1288899E+01 -2.1257018E+01
 -2.1225191E+01 -2.1193421E+01 -2.1161706E+01 -2.1130047E+01
 -2.1098443E+01 -2.1066893E+01 -2.1035399E+01 -2.1003960E+01
 -2.0972576E+01 -2.0941247E+01 -2.0909972E+01 -2.0878751E+01
 -2.0847584E+01 -2.0816473E+01 -2.0785415E+01 -2.0754411E+01
 -2.0723462E+01 -2.0692565E+01 -2.0661723E+01 -2.0630935E+01
 -2.0600200E+01 -2.0569518E+01 -2.0538890E+01 -2.0508314E+01
 -2.0477792E+01 -2.0447323E+01 -2.0416907E+01 -2.0386544E+01
 -2.0356232E+01 -2.0325974E+01 -2.0295769E+01 -2.0265615E+01
 -2.0235514E+01 -2.0205465E+01 -2.0175468E+01 -2.0145523E+01
 -2.0115630E+01 -2.0085788E+01 -2.0055998E+01 -2.0026260E+01
 -1.9996574E+01 -1.9966938E+01 -1.9937354E+01 -1.9907820E+01
 -1.9878338E+01 -1.9848907E+01 -1.9819526E+01 -1.9790197E+01
 -1.9760918E+01 -1.9731689E+01 -1.9702511E+01 -1.9673384E+01
 -1.9644306E+01 -1.9615279E+01 -1.9586301E+01 -1.9557374E+01
 -1.9528496E+01 -1.9499669E+01 -1.9470890E+01 -1.9442162E+01
 -1.9413482E+01 -1.9384852E+01 -1.9356272E+01 -1.9327740E+01
 -1.9299257E+01 -1.9270824E+01 -1.9242439E+01 -1.9214103E+01
 -1.9185816E+01 -1.9157577E+01 -1.9129388E+01 -1.9101245E+01
 -1.9073152E+01 -1.9045106E+01 -1.9017110E+01 -1.8989160E+01
 -1.8961259E+01 -1.8933405E+01 -1.8905600E+01 -1.8877841E+01
 -1.8850131E+01 -1.8822468E+01 -1.8794852E+01 -1.8767284E+01
 -1.8739762E+01 -1.8712288E+01 -1.8684860E+01 -1.8657480E+01
 -1.8630146E+01 -1.8602860E+01 -1.8575619E+01 -1.8548426E+01
 -1.8521278E+01 -1.8494177E+01 -1.8467123E+01 -1.8440114E+01
 -1.8413151E+01 -1.8386235E+01 -1.8359364E+01 -1.8332540E+01
 -1.8305760E+01 -1.8279026E+01 -1.8252339E+01 -1.8225696E+01
 -1.8199099E+01 -1.8172547E+01 -1.8146041E+01 -1.8119579E+01
 -1.8093162E+01 -1.8066791E+01 -1.8040464E+01 -1.8014182E+01
 -1.7987945E+01 -1.7961752E+01 -1.7935603E+01 -1.7909499E+01
 -1.7883440E+01 -1.7857424E+01 -1.7831453E+01 -1.7805526E+01
 -1.7779643E+01 -1.7753803E+01 -1.7728007E+01 -1.7702255E+01
 -1.7676548E+01 -1.7650883E+01 -1.7625261E+01 -1.7599684E+01
 -1.7574149E+01 -1.7548658E+01 -1.7523209E+01 -1.7497805E+01
 -1.7472442E+01 -1.7447123E+01 -1.7421846E+01 -1.7396612E+01
 -1.7371421E+01 -1.7346273E+01 -1.7321167E+01 -1.7296103E+01
 -1.7271081E+01 -1.7246102E+01 -1.7221165E+01 -1.7196270E+01
 -1.7171417E+01 -1.7146606E+01 -1.7121836E+01 -1.7097109E+01
 -1.7072423E+01 -1.7047778E+01 -1.7023175E+01 -1.6998614E+01
 -1.6974094E+01 -1.6949615E+01 -1.6925177E+01 -1.6900780E+01
 -1.6876424E+01 -1.6852110E+01 -1.6827836E+01 -1.6803603E+01
 -1.6779410E+01 -1.6755259E+01 -1.6731148E+01 -1.6707077E+01
 -1.6683047E+01 -1.6659057E+01 -1.6635107E+01 -1.6611197E+01
 -1.6587328E+01 -1.6563498E+01 -1.6539709E+01 -1.6515959E+01
 -1.6492249E+01 -1.6468579E+01 -1.6444949E+01 -1.6421357E+01
 -1.6397806E+01 -1.6374293E+01 -1.6350821E+01 -1.6327387E+01
 -1.6303992E+01 -1.6280637E+01 -1.6257320E+01 -1.6234043E+01
 -1.6210805E+01 -1.6187605E+01 -1.6164444E+01 -1.6141322E+01
 -1.6118238E+01 -1.6095193E+01 -1.6072186E+01 -1.6049217E+01
 -1.6026287E+01 -1.6003395E+01 -1.5980541E+01 -1.5957725E+01
 -1.5934948E+01 -1.5912208E+01 -1.5889506E+01 -1.5866842E+01
 -1.5844215E+01 -1.5821627E+01 -1.5799075E+01 -1.5776561E+01
 -1.5754085E+01 -1.5731646E+01 -1.5709244E+01 -1.5686879E+01
 -1.5664552E+01 -1.5642262E+01 -1.5620009E+01 -1.5597792E+01
 -1.5575612E+01 -1.5553469E+01 -1.5531364E+01 -1.5509294E+01
 -1.5487262E+01 -1.5465265E+01 -1.5443305E+01 -1.5421382E+01
 -1.5399494E+01 -1.5377643E+01 -1.5355829E+01 -1.5334049E+01
 -1.5312307E+01 -1.5290600E+01 -1.5268929E+01 -1.5247295E+01
 -1.5225695E+01 -1.5204131E+01 -1.5182603E+01 -1.5161111E+01
 -1.5139654E+01 -1.5118232E+01 -1.5096847E+01 -1.5075496E+01
 -1.5054180E+01 -1.5032900E+01 -1.5011654E+01 -1.4990444E+01
 -1.4969268E+01 -1.4948128E+01 -1.4927022E+01 -1.4905951E+01
 -1.4884915E+01 -1.4863913E+01 -1.4842946E+01 -1.4822013E+01
 -1.4801115E+01 -1.4780252E+01 -1.4759422E+01 -1.4738627E+01
 -1.4717866E+01 -1.4697139E+01 -1.4676446E+01 -1.4655787E+01
 -1.4635162E+01 -1.4614571E+01 -1.4594013E+01 -1.4573490E+01
 -1.4553000E+01 -1.4532544E+01 -1.4512121E+01 -1.4491731E+01
 -1.4471375E+01 -1.4451053E+01 -1.4430764E+01 -1.4410508E+01
 -1.4390285E+01 -1.4370095E+01 -1.4349938E+01 -1.4329814E+01
 -1.4309723E+01 -1.4289665E+01 -1.4269640E+01 -1.4249648E+01
 -1.4229688E+01 -1.4209760E+01 -1.4189866E+01 -1.4170004E+01
 -1.4150174E+01 -1.4130377E+01 -1.4110612E+01 -1.4090879E+01
 -1.4071178E+01 -1.4051510E+01 -1.4031873E+01 -1.4012269E+01
 -1.3992696E+01 -1.3973156E+01 -1.3953647E+01 -1.3934170E+01
 -1.3914725E+01 -1.3895311E+01 -1.3875929E+01 -1.3856579E+01
 -1.3837259E+01 -1.3817972E+01 -1.3798715E+01 -1.3779491E+01
 -1.3760297E+01 -1.3741134E+01 -1.3722003E+01 -1.3702903E+01
 -1.3683833E+01 -1.3664795E+01 -1.3645787E+01 -1.3626811E+01
 -1.3607865E+01 -1.3588950E+01 -1.3570065E+01 -1.3551212E+01
 -1.3532388E+01 -1.3513595E+01 -1.3494833E+01 -1.3476101E+01
 -1.3457399E+01 -1.3438728E+01 -1.3420087E+01 -1.3401476E+01
 -1.3382895E+01 -1.3364344E+01 -1.3345823E+01 -1.3327332E+01
 -1.3308872E+01 -1.3290440E+01 -1.3272038E+01 -1.3253667E+01
 -1.3235325E+01 -1.3217012E+01 -1.3198730E+01 -1.3180476E+01
 -1.3162252E+01 -1.3144058E+01 -1.3125893E+01 -1.3107756E+01
 -1.3089650E+01 -1.3071572E+01 -1.3053524E+01 -1.3035504E+01
 -1.3017514E+01 -1.2999553E+01 -1.2981620E+01 -1.2963716E+01
 -1.2945842E+01 -1.2927995E+01 -1.2910178E+01 -1.2892390E+01
 -1.2874629E+01 -1.2856898E+01 -1.2839195E+01 -1.2821520E+01
 -1.2803873E+01 -1.2786256E+01 -1.2768666E+01 -1.2751104E+01
 -1.2733571E+01 -1.2716066E+01 -1.2698589E+01 -1.2681140E+01
 -1.2663719E+01 -1.2646325E+01 -1.2628960E+01 -1.2611622E+01
 -1.2594313E+01 -1.2577031E+01 -1.2559776E+01 -1.2542549E+01
 -1.2525350E+01 -1.2508178E+01 -1.2491034E+01 -1.2473918E+01
 -1.2456828E+01 -1.2439766E+01 -1.2422731E+01 -1.2405723E+01
 -1.2388742E+01 -1.2371789E+01 -1.2354863E+01 -1.2337963E+01
 -1.2321091E+01 -1.2304245E+01 -1.2287426E+01 -1.2270635E+01
 -1.2253870E+01 -1.2237131E+01 -1.2220420E+01 -1.2203735E+01
 -1.2187076E+01 -1.2170444E+01 -1.2153839E+01 -1.2137259E+01
 -1.2120707E+01 -1.2104180E+01 -1.2087680E+01 -1.2071207E+01
 -1.2054759E+01 -1.2038337E+01 -1.2021942E+01 -1.2005573E+01
 -1.1989229E+01 -1.1972912E+01 -1.1956620E+01 -1.1940355E+01
 -1.1924115E+01 -1.1907901E+01 -1.1891712E+01 -1.1875550E+01
 -1.1859413E+01 -1.1843301E+01 -1.1827215E+01 -1.1811155E+01
 -1.1795120E+01 -1.1779110E+01 -1.1763125E+01 -1.1747166E+01
 -1.1731232E+01 -1.1715324E+01 -1.1699441E+01 -1.1683583E+01
 -1.1667749E+01 -1.1651941E+01 -1.1636158E+01 -1.1620400E+01
 -1.1604666E+01 -1.1588958E+01 -1.1573274E+01 -1.1557615E+01
 -1.1541981E+01 -1.1526371E+01 -1.1510786E+01 -1.1495226E+01
 -1.1479690E+01 -1.1464179E+01 -1.1448692E+01 -1.1433230E+01
 -1.1417792E+01 -1.1402378E+01 -1.1386988E+01 -1.1371622E+01
 -1.1356281E+01 -1.1340965E+01 -1.1325671E+01 -1.1310403E+01
 -1.1295158E+01 -1.1279937E+01 -1.1264740E+01 -1.1249567E+01
 -1.1234418E+01 -1.1219292E+01 -1.1204191E+01 -1.1189113E+01
 -1.1174058E+01 -1.1159027E+01 -1.1144021E+01 -1.1129037E+01
 -1.1114077E+01 -1.1099141E+01 -1.1084227E+01 -1.1069337E+01
 -1.1054471E+01 -1.1039627E+01 -1.1024808E+01 -1.1010011E+01
 -1.0995237E+01 -1.0980487E+01 -1.0965760E+01 -1.0951055E+01
 -1.0936374E+01 -1.0921715E+01 -1.0907080E+01 -1.0892468E+01
 -1.0877878E+01 -1.0863311E+01 -1.0848767E+01 -1.0834245E+01
 -1.0819746E+01 -1.0805270E+01 -1.0790816E+01 -1.0776386E+01
 -1.0761977E+01 -1.0747591E+01 -1.0733227E+01 -1.0718886E+01
 -1.0704567E+01 -1.0690271E+01 -1.0675996E+01 -1.0661744E+01
 -1.0647514E+01 -1.0633307E+01 -1.0619121E+01 -1.0604957E+01
 -1.0590816E+01 -1.0576697E+01 -1.0562599E+01 -1.0548523E+01
 -1.0534469E+01 -1.0520438E+01 -1.0506428E+01 -1.0492439E+01
 -1.0478472E+01 -1.0464527E+01 -1.0450604E+01 -1.0436702E+01
 -1.0422822E+01 -1.0408964E+01 -1.0395126E+01 -1.0381311E+01
 -1.0367516E+01 -1.0353744E+01 -1.0339992E+01 -1.0326262E+01
 -1.0312553E+01 -1.0298865E+01 -1.0285199E+01 -1.0271553E+01
 -1.0257929E+01 -1.0244326E+01 -1.0230744E+01 -1.0217183E+01
 -1.0203643E+01 -1.0190123E+01 -1.0176625E+01 -1.0163147E+01
 -1.0149691E+01 -1.0136255E+01 -1.0122840E+01 -1.0109445E+01
 -1.0096072E+01 -1.0082719E+01 -1.0069386E+01 -1.0056074E+01
 -1.0042783E+01 -1.0029512E+01 -1.0016261E+01 -1.0003031E+01
 -9.9898215E+00 -9.9766320E+00 -9.9634628E+00 -9.9503145E+00
 -9.9371858E+00 -9.9240773E+00 -9.9109890E+00 -9.8979210E+00
 -9.8848733E+00 -9.8718458E+00 -9.8588378E+00 -9.8458500E+00
 -9.8328825E+00 -9.8199345E+00 -9.8070060E+00 -9.7940978E+00
 -9.7812098E+00 -9.7683413E+00 -9.7554923E+00 -9.7426628E+00
 -9.7298535E+00 -9.7170638E+00 -9.7042935E+00 -9.6915428E+00
 -9.6788115E+00 -9.6661005E+00 -9.6534083E+00 -9.6407355E+00
 -9.6280823E+00 -9.6154485E+00 -9.6028335E+00 -9.5902388E+00
 -9.5776628E+00 -9.5651055E+00 -9.5525685E+00 -9.5400495E+00
 -9.5275508E+00 -9.5150708E+00 -9.5026095E+00 -9.4901670E+00
 -9.4777440E+00 -9.4653405E+00 -9.4529550E+00 -9.4405890E+00
 -9.4282418E+00 -9.4159133E+00 -9.4036035E+00 -9.3913125E+00
 -9.3790403E+00 -9.3667868E+00 -9.3545520E+00 -9.3423353E+00
 -9.3301380E+00 -9.3179588E+00 -9.3057983E+00 -9.2936565E+00
 -9.2815328E+00 -9.2694278E+00 -9.2573415E+00 -9.2452733E+00
 -9.2332230E+00 -9.2211915E+00 -9.2091788E+00 -9.1971833E+00
 -9.1852065E+00 -9.1732478E+00 -9.1613078E+00 -9.1493850E+00
 -9.1374810E+00 -9.1255950E+00 -9.1137270E+00 -9.1018763E+00
 -9.0900443E+00 -9.0782303E+00 -9.0664343E+00 -9.0546555E+00
 -9.0428948E+00 -9.0311520E+00 -9.0194273E+00 -9.0077198E+00
 -8.9960303E+00 -8.9843588E+00 -8.9727045E+00 -8.9610683E+00
 -8.9494493E+00 -8.9378483E+00 -8.9262645E+00 -8.9146980E+00
 -8.9031495E+00 -8.8916175E+00 -8.8801043E+00 -8.8686075E+00
 -8.8571280E+00 -8.8456665E+00 -8.8342223E+00 -8.8227945E+00
 -8.8113848E+00 -8.7999915E+00 -8.7886163E+00 -8.7772575E+00
 -8.7659168E+00 -8.7545925E+00 -8.7432848E+00 -8.7319950E+00
 -8.7207218E+00 -8.7094658E+00 -8.6982263E+00 -8.6870040E+00
 -8.6757983E+00 -8.6646098E+00 -8.6534385E+00 -8.6422830E+00
 -8.6311455E+00 -8.6200238E+00 -8.6089193E+00 -8.5978313E+00
 -8.5867598E+00 -8.5757048E+00 -8.5646670E+00 -8.5536450E+00
 -8.5426403E+00 -8.5316520E+00 -8.5206795E+00 -8.5097243E+00
 -8.4987848E+00 -8.4878625E+00 -8.4769560E+00 -8.4660660E+00
 -8.4551925E+00 -8.4443348E+00 -8.4334935E+00 -8.4226688E+00
 -8.4118605E+00 -8.4010680E+00 -8.3902913E+00 -8.3795310E+00
 -8.3687873E+00 -8.3580593E+00 -8.3473470E+00 -8.3366513E+00
 -8.3259713E+00 -8.3153070E+00 -8.3046585E+00 -8.2940265E+00
 -8.2834103E+00 -8.2728098E+00 -8.2622250E+00 -8.2516560E+00
 -8.2411028E+00 -8.2305653E+00 -8.2200443E+00 -8.2095383E+00
 -8.1990480E+00 -8.1885728E+00 -8.1781140E+00 -8.1676703E+00
 -8.1572423E+00 -8.1468300E+00 -8.1364335E+00 -8.1260520E+00
 -8.1156855E+00 -8.1053355E+00 -8.0950005E+00 -8.0846805E+00
 -8.0743763E+00 -8.0640870E+00 -8.0538128E+00 -8.0435543E+00
 -8.0333115E+00 -8.0230830E+00 -8.0128703E+00 -8.0026725E+00
 -7.9924898E+00 -7.9823228E+00 -7.9721700E+00 -7.9620330E+00
 -7.9519103E+00 -7.9418033E+00 -7.9317105E+00 -7.9216335E+00
 -7.9115708E+00 -7.9015238E+00 -7.8914910E+00 -7.8814733E+00
 -7.8714705E+00 -7.8614820E+00 -7.8515085E+00 -7.8415500E+00
 -7.8316065E+00 -7.8216773E+00 -7.8117630E+00 -7.8018630E+00
 -7.7919780E+00 -7.7821073E+00 -7.7722515E+00 -7.7624100E+00
 -7.7525828E+00 -7.7427705E+00 -7.7329725E+00 -7.7231895E+00
 -7.7134208E+00 -7.7036655E+00 -7.6939260E+00 -7.6842000E+00
 -7.6744883E+00 -7.6647915E+00 -7.6551083E+00 -7.6454400E+00
 -7.6357853E+00 -7.6261455E+00 -7.6165193E+00 -7.6069080E+00
 -7.5973103E+00 -7.5877268E+00 -7.5781575E+00 -7.5686018E+00
 -7.5590603E+00 -7.5495330E+00 -7.5400200E+00 -7.5305213E+00
 -7.5210360E+00 -7.5115643E+00 -7.5021068E+00 -7.4926634E+00
 -7.4832337E+00 -7.4738178E+00 -7.4644158E+00 -7.4550276E+00
 -7.4456531E+00 -7.4362925E+00 -7.4269455E+00 -7.4176122E+00
 -7.4082926E+00 -7.3989867E+00 -7.3896944E+00 -7.3804157E+00
 -7.3711507E+00 -7.3618991E+00 -7.3526612E+00 -7.3434367E+00
 -7.3342258E+00 -7.3250283E+00 -7.3158443E+00 -7.3066736E+00
 -7.2975164E+00 -7.2883727E+00 -7.2792422E+00 -7.2701252E+00
 -7.2610214E+00 -7.2519308E+00 -7.2428537E+00 -7.2337897E+00
 -7.2247390E+00 -7.2157015E+00 -7.2066772E+00 -7.1976660E+00
 -7.1886680E+00 -7.1796831E+00 -7.1707113E+00 -7.1617526E+00
 -7.1528069E+00 -7.1438743E+00 -7.1349546E+00 -7.1260480E+00
 -7.1171543E+00 -7.1082737E+00 -7.0994058E+00 -7.0905509E+00
 -7.0817090E+00 -7.0728798E+00 -7.0640635E+00 -7.0552600E+00
 -7.0464693E+00 -7.0376914E+00 -7.0289263E+00 -7.0201739E+00
 -7.0114341E+00 -7.0027071E+00 -6.9939928E+00 -6.9852911E+00
 -6.9766020E+00 -6.9679255E+00 -6.9592616E+00 -6.9506103E+00
 -6.9419716E+00 -6.9333453E+00 -6.9247316E+00 -6.9161303E+00
 -6.9075415E+00 -6.8989652E+00 -6.8904012E+00 -6.8818497E+00
 -6.8733105E+00 -6.8647838E+00 -6.8562692E+00 -6.8477672E+00
 -6.8392773E+00 -6.8307997E+00 -6.8223344E+00 -6.8138813E+00
 -6.8054405E+00 -6.7970118E+00 -6.7885953E+00 -6.7801910E+00
 -6.7717988E+00 -6.7634188E+00 -6.7550508E+00 -6.7466949E+00
 -6.7383510E+00 -6.7300192E+00 -6.7216994E+00 -6.7133916E+00
 -6.7050958E+00 -6.6968120E+00 -6.6885401E+00 -6.6802800E+00
 -6.6720319E+00 -6.6637957E+00 -6.6555713E+00 -6.6473588E+00
 -6.6391581E+00 -6.6309692E+00 -6.6227921E+00 -6.6146267E+00
 -6.6064730E+00 -6.5983312E+00 -6.5902010E+00 -6.5820824E+00
 -6.5739756E+00 -6.5658804E+00 -6.5577968E+00 -6.5497249E+00
 -6.5416645E+00 -6.5336157E+00 -6.5255785E+00 -6.5175527E+00
 -6.5095385E+00 -6.5015358E+00 -6.4935446E+00 -6.4855648E+00
 -6.4775965E+00 -6.4696396E+00 -6.4616940E+00 -6.4537599E+00
 -6.4458371E+00 -6.4379257E+00 -6.4300256E+00 -6.4221368E+00
 -6.4142593E+00 -6.4063931E+00 -6.3985381E+00 -6.3906944E+00
 -6.3828618E+00 -6.3750404E+00 -6.3672303E+00 -6.3594313E+00
 -6.3516434E+00 -6.3438668E+00 -6.3361011E+00 -6.3283466E+00
 -6.3206031E+00 -6.3128707E+00 -6.3051494E+00 -6.2974390E+00
 -6.2897396E+00 -6.2820512E+00 -6.2743738E+00 -6.2667073E+00
 -6.2590517E+00 -6.2514071E+00 -6.2437734E+00 -6.2361505E+00
 -6.2285385E+00 -6.2209373E+00 -6.2133470E+00 -6.2057674E+00
 -6.1981986E+00 -6.1906406E+00 -6.1830933E+00 -6.1755568E+00
 -6.1680310E+00 -6.1605158E+00 -6.1530114E+00 -6.1455176E+00
 -6.1380345E+00 -6.1305620E+00 -6.1231001E+00 -6.1156489E+00
 -6.1082081E+00 -6.1007780E+00 -6.0933584E+00 -6.0859493E+00
 -6.0785507E+00 -6.0711626E+00 -6.0637850E+00 -6.0564179E+00
 -6.0490611E+00 -6.0417149E+00 -6.0343790E+00 -6.0270534E+00
 -6.0197383E+00 -6.0124336E+00 -6.0051392E+00 -5.9978550E+00
 -5.9905812E+00 -5.9833177E+00 -5.9760644E+00 -5.9688215E+00
 -5.9615888E+00 -5.9543663E+00 -5.9471539E+00 -5.9399518E+00
 -5.9327598E+00 -5.9255780E+00 -5.9184064E+00 -5.9112449E+00
 -5.9040935E+00 -5.8969521E+00 -5.8898209E+00 -5.8826997E+00
 -5.8755885E+00 -5.8684874E+00 -5.8613963E+00 -5.8543151E+00
 -5.8472441E+00 -5.8401829E+00 -5.8331316E+00 -5.8260903E+00
 -5.8190589E+00 -5.8120374E+00 -5.8050258E+00 -5.7980241E+00
 -5.7910322E+00 -5.7840502E+00 -5.7770780E+00 -5.7701155E+00
 -5.7631628E+00 -5.7562200E+00 -5.7492869E+00 -5.7423635E+00
 -5.7354498E+00 -5.7285459E+00 -5.7216517E+00 -5.7147671E+00
 -5.7078922E+00 -5.7010269E+00 -5.6941713E+00 -5.6873253E+00
 -5.6804888E+00 -5.6736620E+00 -5.6668448E+00 -5.6600371E+00
 -5.6532389E+00 -5.6464503E+00 -5.6396711E+00 -5.6329015E+00
 -5.6261414E+00 -5.6193907E+00 -5.6126494E+00 -5.6059176E+00
Al3+    O
  7.1355002E+06  7.1026532E+06  7.0699574E+06  7.0374122E+06
  7.0050167E+06  6.9727705E+06  6.9406726E+06  6.9087225E+06
  6.8769195E+06  6.8452628E+06  6.8137520E+06  6.7823861E+06
  6.7511647E+06  6.7200869E+06  6.6891522E+06  6.6583600E+06
  6.6277094E+06  6.5972000E+06  6.5668310E+06  6.5366018E+06
  6.5065118E+06  6.4765603E+06  6.4467466E+06  6.4170702E+06
  6.3875304E+06  6.3581266E+06  6.3288581E+06  6.2997244E+06
  6.2707248E+06  6.2418587E+06  6.2131254E+06  6.1845245E+06
  6.1560551E+06  6.1277169E+06  6.0995090E+06  6.0714311E+06
  6.0434824E+06  6.0156623E+06  5.9879704E+06  5.9604059E+06
  5.9329682E+06  5.9056569E+06  5.8784713E+06  5.8514108E+06
  5.8244750E+06  5.7976631E+06  5.7709746E+06  5.7444090E+06
  5.7179657E+06  5.6916440E+06  5.6654436E+06  5.6393638E+06
  5.6134040E+06  5.5875638E+06  5.5618424E+06  5.5362395E+06
  5.5107545E+06  5.4853868E+06  5.4601358E+06  5.4350011E+06
  5.4099821E+06  5.3850782E+06  5.3602890E+06  5.3356139E+06
  5.3110523E+06  5.2866039E+06  5.2622680E+06  5.2380441E+06
  5.2139318E+06  5.1899304E+06  5.1660395E+06  5.1422586E+06
  5.1185872E+06  5.0950247E+06  5.0715707E+06  5.0482247E+06
  5.0249861E+06  5.0018545E+06  4.9788294E+06  4.9559102E+06
  4.9330967E+06  4.9103881E+06  4.8877840E+06  4.8652840E+06
  4.8428876E+06  4.8205942E+06  4.7984035E+06  4.7763149E+06
  4.7543281E+06  4.7324424E+06  4.7106575E+06  4.6889728E+06
  4.6673880E+06  4.6459025E+06  4.6245160E+06  4.6032279E+06
  4.5820378E+06  4.5609452E+06  4.5399497E+06  4.5190509E+06
  4.4982483E+06  4.4775415E+06  4.4569299E+06  4.4364133E+06
  4.4159911E+06  4.3956629E+06  4.3754282E+06  4.3552868E+06
  4.3352380E+06  4.3152815E+06  4.2954170E+06  4.2756438E+06
  4.2559616E+06  4.2363701E+06  4.2168688E+06  4.1974572E+06
  4.1781350E+06  4.1589017E+06  4.1397570E+06  4.1207003E+06
  4.1017315E+06  4.0828499E+06  4.0640553E+06  4.0453472E+06
  4.0267252E+06  4.0081889E+06  3.9897379E+06  3.9713719E+06
  3.9530904E+06  3.9348931E+06  3.9167795E+06  3.8987494E+06
  3.8808022E+06  3.8629376E+06  3.8451554E+06  3.8274548E+06
  3.8098359E+06  3.7922980E+06  3.7748408E+06  3.7574641E+06
  3.7401673E+06  3.7229501E+06  3.7058122E+06  3.6887532E+06
  3.6717727E+06  3.6548704E+06  3.6380459E+06  3.6212988E+06
  3.6046288E+06  3.5880356E+06  3.5715187E+06  3.5550779E+06
  3.5387127E+06  3.5224229E+06  3.5062081E+06  3.4900679E+06
  3.4740020E+06  3.4580101E+06  3.4420918E+06  3.4262468E+06
  3.4104747E+06  3.3947752E+06  3.3791480E+06  3.3635927E+06
  3.3481090E+06  3.3326966E+06  3.3173552E+06  3.3020843E+06
  3.2868838E+06  3.2717532E+06  3.2566923E+06  3.2417007E+06
  3.2267782E+06  3.2119243E+06  3.1971388E+06  3.1824214E+06
  3.1677716E+06  3.1531894E+06  3.1386743E+06  3.1242260E+06
  3.1098442E+06  3.0955286E+06  3.0812789E+06  3.0670948E+06
  3.0529760E+06  3.0389222E+06  3.0249331E+06  3.0110084E+06
  2.9971478E+06  2.9833509E+06  2.9696176E+06  2.9559476E+06
  2.9423404E+06  2.9287958E+06  2.9153137E+06  2.9018936E+06
  2.8885352E+06  2.8752384E+06  2.8620028E+06  2.8488281E+06
  2.8357140E+06  2.8226603E+06  2.8096667E+06  2.7967330E+06
  2.7838587E+06  2.7710438E+06  2.7582878E+06  2.7455905E+06
  2.7329517E+06  2.7203711E+06  2.7078483E+06  2.6953832E+06
  2.6829755E+06  2.6706250E+06  2.6583312E+06  2.6460941E+06
  2.6339133E+06  2.6217886E+06  2.6097197E+06  2.5977063E+06
  2.5857482E+06  2.5738452E+06  2.5619970E+06  2.5502033E+06
  2.5384639E+06  2.5267786E+06  2.5151470E+06  2.5035690E+06
  2.4920443E+06  2.4805726E+06  2.4691538E+06  2.4577874E+06
  2.4464735E+06  2.4352116E+06  2.4240016E+06  2.4128431E+06
  2.4017360E+06  2.3906801E+06  2.3796750E+06  2.3687207E+06
  2.3578167E+06  2.3469629E+06  2.3361591E+06  2.3254050E+06
  2.3147004E+06  2.3040452E+06  2.2934389E+06  2.2828815E+06
  2.2723727E+06  2.2619122E+06  2.2514999E+06  2.2411355E+06
  2.2308189E+06  2.2205498E+06  2.2103279E+06  2.2001530E+06
  2.1900250E+06  2.1799436E+06  2.1699087E+06  2.1599199E+06
  2.1499771E+06  2.1400801E+06  2.1302286E+06  2.1204225E+06
  2.1106616E+06  2.1009455E+06  2.0912742E+06  2.0816474E+06
  2.0720649E+06  2.0625266E+06  2.0530321E+06  2.0435813E+06
  2.0341741E+06  2.0248101E+06  2.0154893E+06  2.0062114E+06
  1.9969761E+06  1.9877834E+06  1.9786331E+06  1.9695248E+06
  1.9604585E+06  1.9514338E+06  1.9424507E+06  1.9335090E+06
  1.9246085E+06  1.9157489E+06  1.9069301E+06  1.8981519E+06
  1.8894141E+06  1.8807166E+06  1.8720590E+06  1.8634414E+06
  1.8548633E+06  1.8463248E+06  1.8378256E+06  1.8293655E+06
  1.8209444E+06  1.8125620E+06  1.8042182E+06  1.7959128E+06
  1.7876456E+06  1.7794166E+06  1.7712254E+06  1.7630718E+06
  1.7549558E+06  1.7468773E+06  1.7388359E+06  1.7308314E+06
  1.7228639E+06  1.7149330E+06  1.7070386E+06  1.6991806E+06
  1.6913587E+06  1.6835729E+06  1.6758228E+06  1.6681085E+06
  1.6604297E+06  1.6527862E+06  1.6451779E+06  1.6376046E+06
  1.6300662E+06  1.6225625E+06  1.6150933E+06  1.6076585E+06
  1.6002580E+06  1.5928915E+06  1.5855589E+06  1.5782601E+06
  1.5709949E+06  1.5637631E+06  1.5565646E+06  1.5493992E+06
  1.5422669E+06  1.5351673E+06  1.5281004E+06  1.5210661E+06
  1.5140642E+06  1.5070945E+06  1.5001568E+06  1.4932511E+06
  1.4863772E+06  1.4795350E+06  1.4727242E+06  1.4659448E+06
  1.4591966E+06  1.4524794E+06  1.4457932E+06  1.4391378E+06
  1.4325130E+06  1.4259187E+06  1.4193547E+06  1.4128210E+06
  1.4063173E+06  1.3998436E+06  1.3933997E+06  1.3869854E+06
  1.3806007E+06  1.3742453E+06  1.3679192E+06  1.3616223E+06
  1.3553543E+06  1.3491152E+06  1.3429048E+06  1.3367230E+06
  1.3305696E+06  1.3244446E+06  1.3183478E+06  1.3122790E+06
  1.3062382E+06  1.3002251E+06  1.2942398E+06  1.2882820E+06
  1.2823516E+06  1.2764486E+06  1.2705727E+06  1.2647238E+06
  1.2589019E+06  1.2531068E+06  1.2473383E+06  1.2415964E+06
  1.2358810E+06  1.2301918E+06  1.2245288E+06  1.2188920E+06
  1.2132810E+06  1.2076959E+06  1.2021365E+06  1.1966027E+06
  1.1910944E+06  1.1856113E+06  1.1801537E+06  1.1747210E+06
  1.1693134E+06  1.1639307E+06  1.1585727E+06  1.1532395E+06
  1.1479307E+06  1.1426465E+06  1.1373865E+06  1.1321507E+06
  1.1269391E+06  1.1217515E+06  1.1165876E+06  1.1114477E+06
  1.1063313E+06  1.1012385E+06  1.0961692E+06  1.0911232E+06
  1.0861004E+06  1.0811007E+06  1.0761241E+06  1.0711703E+06
  1.0662394E+06  1.0613312E+06  1.0564455E+06  1.0515824E+06
  1.0467416E+06  1.0419231E+06  1.0371269E+06  1.0323526E+06
  1.0276004E+06  1.0228700E+06  1.0181614E+06  1.0134745E+06
  1.0088091E+06  1.0041653E+06  9.9954278E+05  9.9494160E+05
  9.9036150E+05  9.8580263E+05  9.8126460E+05  9.7674758E+05
  9.7225125E+05  9.6777570E+05  9.6332070E+05  9.5888625E+05
  9.5447220E+05  9.5007848E+05  9.4570493E+05  9.4135155E+05
  9.3701828E+05  9.3270488E+05  9.2841135E+05  9.2413755E+05
  9.1988348E+05  9.1564890E+05  9.1143390E+05  9.0723833E+05
  9.0306203E+05  8.9890493E+05  8.9476695E+05  8.9064810E+05
  8.8654815E+05  8.8246710E+05  8.7840480E+05  8.7436125E+05
  8.7033630E+05  8.6632988E+05  8.6234183E+05  8.5837223E+05
  8.5442085E+05  8.5048770E+05  8.4657263E+05  8.4267563E+05
  8.3879648E+05  8.3493525E+05  8.3109180E+05  8.2726598E+05
  8.2345785E+05  8.1966720E+05  8.1589403E+05  8.1213818E+05
  8.0839965E+05  8.0467838E+05  8.0097413E+05  7.9728705E+05
  7.9361685E+05  7.8996360E+05  7.8632715E+05  7.8270743E+05
  7.7910435E+05  7.7551793E+05  7.7194800E+05  7.6839443E+05
  7.6485728E+05  7.6133640E+05  7.5783173E+05  7.5434318E+05
  7.5087075E+05  7.4741423E+05  7.4397364E+05  7.4054890E+05
  7.3713992E+05  7.3374663E+05  7.3036896E+05  7.2700685E+05
  7.2366020E+05  7.2032897E+05  7.1701307E+05  7.1371243E+05
  7.1042699E+05  7.0715666E+05  7.0390140E+05  7.0066112E+05
  6.9743576E+05  6.9422524E+05  6.9102950E+05  6.8784848E+05
  6.8468210E+05  6.8153029E+05  6.7839299E+05  6.7527013E+05
  6.7216165E+05  6.6906748E+05  6.6598755E+05  6.6292180E+05
  6.5987016E+05  6.5683257E+05  6.5380896E+05  6.5079927E+05
  6.4780344E+05  6.4482140E+05  6.4185308E+05  6.3889843E+05
  6.3595738E+05  6.3302987E+05  6.3011583E+05  6.2721521E+05
  6.2432794E+05  6.2145396E+05  6.1859321E+05  6.1574564E+05
  6.1291116E+05  6.1008974E+05  6.0728130E+05  6.0448580E+05
  6.0170316E+05  5.9893333E+05  5.9617625E+05  5.9343186E+05
  5.9070011E+05  5.8798093E+05  5.8527427E+05  5.8258007E+05
  5.7989827E+05  5.7722882E+05  5.7457165E+05  5.7192671E+05
  5.6929395E+05  5.6667332E+05  5.6406474E+05  5.6146817E+05
  5.5888355E+05  5.5631084E+05  5.5374997E+05  5.5120088E+05
  5.4866353E+05  5.4613786E+05  5.4362381E+05  5.4112134E+05
  5.3863039E+05  5.3615090E+05  5.3368283E+05  5.3122613E+05
  5.2878072E+05  5.2634657E+05  5.2392364E+05  5.2151186E+05
  5.1911117E+05  5.1672154E+05  5.1434291E+05  5.1197522E+05
  5.0961844E+05  5.0727251E+05  5.0493737E+05  5.0261298E+05
  5.0029930E+05  4.9799627E+05  4.9570383E+05  4.9342195E+05
  4.9115057E+05  4.8888965E+05  4.8663914E+05  4.8439898E+05
  4.8216914E+05  4.7994956E+05  4.7774021E+05  4.7554102E+05
  4.7335196E+05  4.7117297E+05  4.6900401E+05  4.6684504E+05
  4.6469600E+05  4.6255686E+05  4.6042757E+05  4.5830807E+05
  4.5619833E+05  4.5409831E+05  4.5200795E+05  4.4992721E+05
  4.4785606E+05  4.4579444E+05  4.4374231E+05  4.4169962E+05
  4.3966634E+05  4.3764242E+05  4.3562781E+05  4.3362248E+05
  4.3162637E+05  4.2963947E+05  4.2766170E+05  4.2569303E+05
  4.2373344E+05  4.2178286E+05  4.1984126E+05  4.1790860E+05
  4.1598483E+05  4.1406992E+05  4.1216383E+05  4.1026651E+05
  4.0837793E+05  4.0649803E+05  4.0462679E+05  4.0276417E+05
  4.0091012E+05  3.9906461E+05  3.9722758E+05  3.9539902E+05
  3.9357887E+05  3.9176711E+05  3.8996368E+05  3.8816855E+05
  3.8638169E+05  3.8460305E+05  3.8283260E+05  3.8107031E+05
  3.7931612E+05  3.7757000E+05  3.7583193E+05  3.7410186E+05
  3.7237975E+05  3.7066557E+05  3.6895928E+05  3.6726084E+05
  3.6557023E+05  3.6388739E+05  3.6221231E+05  3.6054493E+05
  3.5888522E+05  3.5723316E+05  3.5558870E+05  3.5395182E+05
  3.5232247E+05  3.5070062E+05  3.4908623E+05  3.4747928E+05
  3.4587972E+05  3.4428752E+05  3.4270266E+05  3.4112510E+05
  3.3955479E+05  3.3799171E+05  3.3643583E+05  3.3488711E+05
  3.3334552E+05  3.3181103E+05  3.3028359E+05  3.2876319E+05
  3.2724980E+05  3.2574336E+05  3.2424386E+05  3.2275127E+05
  3.2126554E+05  3.1978665E+05  3.1831457E+05  3.1684927E+05
  3.1539071E+05  3.1393887E+05  3.1249371E+05  3.1105520E+05
  3.0962332E+05  3.0819803E+05  3.0677929E+05  3.0536709E+05
  3.0396139E+05  3.0256216E+05  3.0116937E+05  2.9978300E+05
  2.9840300E+05  2.9702936E+05  2.9566203E+05  2.9430101E+05
  2.9294625E+05  2.9159773E+05  2.9025541E+05  2.8891927E+05
  2.8758929E+05  2.8626542E+05  2.8494765E+05  2.8363595E+05
  2.8233028E+05  2.8103063E+05  2.7973695E+05  2.7844924E+05
  2.7716745E+05  2.7589156E+05  2.7462155E+05  2.7335738E+05
  2.7209903E+05  2.7084647E+05  2.6959967E+05  2.6835862E+05
  2.6712329E+05  2.6589363E+05  2.6466964E+05  2.6345128E+05
  2.6223853E+05  2.6103137E+05  2.5982975E+05  2.5863368E+05
  2.5744310E+05  2.5625801E+05  2.5507838E+05  2.5390417E+05
  2.5273537E+05  2.5157195E+05  2.5041389E+05  2.4926115E+05
  2.4811372E+05  2.4697157E+05  2.4583469E+05  2.4470303E+05
  2.4357659E+05  2.4245533E+05  2.4133923E+05  2.4022827E+05
  2.3912243E+05  2.3802167E+05  2.3692598E+05  2.3583533E+05
  2.3474971E+05  2.3366909E+05  2.3259343E+05  2.3152273E+05
  2.3045696E+05  2.2939609E+05  2.2834011E+05  2.2728899E+05
  2.2624271E+05  2.2520124E+05  2.2416457E+05  2.2313267E+05
  2.2210552E+05  2.2108310E+05  2.2006538E+05  2.1905235E+05
  2.1804398E+05  2.1704026E+05  2.1604115E+05  2.1504665E+05
  2.1405672E+05  2.1307135E+05  2.1209051E+05  2.1111419E+05
  2.1014237E+05  2.0917502E+05  2.0821212E+05  2.0725365E+05
  2.0629960E+05  2.0534994E+05  2.0440465E+05  2.0346371E+05
  2.0252710E+05  2.0159480E+05  2.0066680E+05  1.9974307E+05
  1.9882359E+05  1.9790834E+05  1.9699730E+05  1.9609046E+05
  1.9518780E+05  1.9428929E+05  1.9339491E+05  1.9250465E+05
  1.9161850E+05  1.9073642E+05  1.8985840E+05  1.8898442E+05
  1.8811446E+05  1.8724851E+05  1.8638655E+05  1.8552855E+05
  1.8467450E+05  1.8382439E+05  1.8297819E+05  1.8213588E+05
  1.8129746E+05  1.8046289E+05  1.7963216E+05  1.7880526E+05
  1.7798216E+05  1.7716285E+05  1.7634731E+05  1.7553553E+05
  1.7472749E+05  1.7392316E+05  1.7312254E+05  1.7232560E+05
  1.7153233E+05  1.7074271E+05  1.6995673E+05  1.6917437E+05
  1.6839560E+05  1.6762043E+05  1.6684882E+05  1.6608076E+05
  1.6531624E+05  1.6455524E+05  1.6379774E+05  1.6304372E+05
  1.6229318E+05  1.6154609E+05  1.6080245E+05  1.6006222E+05
  1.5932540E+05  1.5859198E+05  1.5786193E+05  1.5713525E+05
  1.5641190E+05  1.5569189E+05  1.5497519E+05  1.5426179E+05
  1.5355167E+05  1.5284483E+05  1.5214124E+05  1.5144088E+05
  1.5074375E+05  1.5004983E+05  1.4935910E+05  1.4867156E+05
  1.4798717E+05  1.4730594E+05  1.4662784E+05  1.4595287E+05
  1.4528100E+05  1.4461223E+05  1.4394653E+05  1.4328390E+05
  1.4262432E+05  1.4196778E+05  1.4131425E+05  1.4066374E+05
  1.4001622E+05  1.3937168E+05  1.3873011E+05  1.3809149E+05
  1.3745582E+05  1.3682306E+05  1.3619322E+05  1.3556628E+05
  1.3494223E+05  1.3432105E+05  1.3370273E+05  1.3308725E+05
  1.3247461E+05  1.3186478E+05  1.3125777E+05  1.3065355E+05
  1.3005211E+05  1.2945344E+05  1.2885752E+05  1.2826435E+05
  1.2767391E+05  1.2708619E+05  1.2650117E+05  1.2591884E+05
  1.2533920E+05  1.2476222E+05  1.2418790E+05  1.2361622E+05
  1.2304718E+05  1.2248076E+05  1.2191694E+05  1.2135572E+05
  1.2079708E+05  1.2024101E+05  1.1968751E+05  1.1913655E+05
  1.1858813E+05  1.1804222E+05  1.1749884E+05  1.1695796E+05
  1.1641956E+05  1.1588364E+05  1.1535020E+05  1.1481920E+05
  1.1429066E+05  1.1376454E+05  1.1324084E+05  1.1271956E+05
  1.1220068E+05  1.1168418E+05  1.1117006E+05  1.1065832E+05
  1.1014892E+05  1.0964187E+05  1.0913715E+05  1.0863476E+05
  1.0813468E+05  1.0763690E+05  1.0714142E+05  1.0664821E+05
  1.0615727E+05  1.0566860E+05  1.0518218E+05  1.0469798E+05
  1.0421603E+05  1.0373629E+05  1.0325876E+05  1.0278343E+05
  1.0231028E+05  1.0183931E+05  1.0137052E+05  1.0090388E+05
  1.0043939E+05  9.9977025E+04  9.9516803E+04  9.9058695E+04
  9.8602695E+04  9.8148795E+04  9.7696988E+04  9.7247258E+04
  9.6799598E+04  9.6354000E+04  9.5910450E+04  9.5468948E+04
  9.5029470E+04  9.4592018E+04  9.4156583E+04  9.3723150E+04
  9.3291713E+04  9.2862263E+04  9.2434793E+04  9.2009280E+04
  9.1585733E+04  9.1164135E+04  9.0744480E+04  9.0326753E+04
  8.9910953E+04  8.9497065E+04  8.9085083E+04  8.8674990E+04
  8.8266795E+04  8.7860475E+04  8.7456023E+04  8.7053438E+04
  8.6652705E+04  8.6253810E+04  8.5856760E+04  8.5461533E+04
  8.5068128E+04  8.4676530E+04  8.4286740E+04  8.3898743E+04
  8.3512530E+04  8.3128095E+04  8.2745430E+04  8.2364528E+04
  8.1985380E+04  8.1607973E+04  8.1232305E+04  8.0858370E+04
  8.0486153E+04  8.0115645E+04  7.9746848E+04  7.9379753E+04
  7.9014338E+04  7.8650610E+04  7.8288555E+04  7.7928173E+04
  7.7569440E+04  7.7212365E+04  7.6856933E+04  7.6503135E+04
  7.6150973E+04  7.5800423E+04  7.5430650E+04  7.5083393E+04
  7.4737738E+04  7.4393666E+04  7.4051173E+04  7.3710248E+04
  7.3370884E+04  7.3033071E+04  7.2696800E+04  7.2362065E+04
  7.2028854E+04  7.1697161E+04  7.1366976E+04  7.1038291E+04
  7.0711097E+04  7.0385387E+04  7.0061153E+04  6.9738384E+04
  6.9417074E+04  6.9097214E+04  6.8778796E+04  6.8461812E+04
  6.8146253E+04  6.7832113E+04  6.7519382E+04  6.7208053E+04
  6.6898118E+04  6.6589568E+04  6.6282398E+04  6.5976596E+04
  6.5672159E+04  6.5369075E+04  6.5067339E+04  6.4766943E+04
  6.4467879E+04  6.4170139E+04  6.3873716E+04  6.3578603E+04
  6.3284792E+04  6.2992276E+04  6.2701046E+04  6.2411098E+04
  6.2122421E+04  6.1835011E+04  6.1548859E+04  6.1263958E+04
  6.0980302E+04  6.0697882E+04  6.0416693E+04  6.0136727E+04
  5.9857976E+04  5.9580435E+04  5.9304097E+04  5.9028954E+04
  5.8755000E+04  5.8482227E+04  5.8210631E+04  5.7940202E+04
  5.7670937E+04  5.7402826E+04  5.7135863E+04  5.6870044E+04
  5.6605360E+04  5.6341805E+04  5.6079374E+04  5.5818059E+04
  5.5557854E+04  5.5298754E+04  5.5040751E+04  5.4783839E+04
  5.4528013E+04  5.4273266E+04  5.4019592E+04  5.3766985E+04
  5.3515439E+04  5.3264948E+04  5.3015505E+04  5.2767106E+04
  5.2519743E+04  5.2273412E+04  5.2028107E+04  5.1783821E+04
  5.1540548E+04  5.1298285E+04  5.1057023E+04  5.0816758E+04
  5.0577485E+04  5.0339197E+04  5.0101889E+04  4.9865556E+04
  4.9630193E+04  4.9395792E+04  4.9162350E+04  4.8929861E+04
  4.8698319E+04  4.8467720E+04  4.8238057E+04  4.8009326E+04
  4.7781522E+04  4.7554640E+04  4.7328673E+04  4.7103617E+04
  4.6879468E+04  4.6656220E+04  4.6433867E+04  4.6212407E+04
  4.5991832E+04  4.5772138E+04  4.5553320E+04  4.5335374E+04
  4.5118295E+04  4.4902078E+04  4.4686718E+04  4.4472210E+04
  4.4258550E+04  4.4045734E+04  4.3833755E+04  4.3622612E+04
  4.3412297E+04  4.3202807E+04  4.2994138E+04  4.2786284E+04
  4.2579242E+04  4.2373007E+04  4.2167576E+04  4.1962942E+04
  4.1759102E+04  4.1556053E+04  4.1353789E+04  4.1152306E+04
  4.0951601E+04  4.0751669E+04  4.0552505E+04  4.0354106E+04
  4.0156469E+04  3.9959588E+04  3.9763460E+04  3.9568080E+04
  3.9373445E+04  3.9179552E+04  3.8986394E+04  3.8793971E+04
  3.8602277E+04  3.8411308E+04  3.8221061E+04  3.8031532E+04
  3.7842717E+04  3.7654613E+04  3.7467216E+04  3.7280522E+04
  3.7094528E+04  3.6909230E+04  3.6724625E+04  3.6540708E+04
  3.6357477E+04  3.6174929E+04  3.5993058E+04  3.5811863E+04
  3.5631341E+04  3.5451486E+04  3.5272297E+04  3.5093769E+04
  3.4915901E+04  3.4738687E+04  3.4562126E+04  3.4386213E+04
  3.4210946E+04  3.4036322E+04  3.3862337E+04  3.3688988E+04
  3.3516274E+04  3.3344189E+04  3.3172731E+04  3.3001898E+04
  3.2831686E+04  3.2662092E+04  3.2493113E+04  3.2324747E+04
  3.2156991E+04  3.1989842E+04  3.1823296E+04  3.1657352E+04
  3.1492006E+04  3.1327256E+04  3.1163098E+04  3.0999531E+04
  3.0836552E+04  3.0674156E+04  3.0512344E+04  3.0351111E+04
  3.0190455E+04  3.0030374E+04  2.9870865E+04  2.9711925E+04
  2.9553552E+04  2.9395744E+04  2.9238497E+04  2.9081811E+04
  2.8925681E+04  2.8770107E+04  2.8615085E+04  2.8460613E+04
  2.8306689E+04  2.8153311E+04  2.8000476E+04  2.7848182E+04
  2.7696427E+04  2.7545208E+04  2.7394524E+04  2.7244372E+04
  2.7094751E+04  2.6945657E+04  2.6797089E+04  2.6649045E+04
  2.6501523E+04  2.6354521E+04  2.6208036E+04  2.6062067E+04
  2.5916612E+04  2.5771670E+04  2.5627236E+04  2.5483311E+04
  2.5339892E+04  2.5196977E+04  2.5054564E+04  2.4912652E+04
  2.4771239E+04  2.4630322E+04  2.4489901E+04  2.4349973E+04
  2.4210536E+04  2.4071590E+04  2.3933132E+04  2.3795159E+04
  2.3657672E+04  2.3520669E+04  2.3384147E+04  2.3248105E+04
  2.3112541E+04  2.2977454E+04  2.2842842E+04  2.2708704E+04
  2.2575038E+04  2.2441843E+04  2.2309116E+04  2.2176858E+04
  2.2045066E+04  2.1913739E+04  2.1782875E+04  2.1652472E+04
  2.1522531E+04  2.1393049E+04  2.1264025E+04  2.1135457E+04
  2.1007344E+04  2.0879686E+04  2.0752480E+04  2.0625725E+04
  2.0499421E+04  2.0373565E+04  2.0248157E+04  2.0123195E+04
  1.9998679E+04  1.9874606E+04  1.9750976E+04  1.9627789E+04
  1.9505041E+04  1.9382733E+04  1.9260864E+04  1.9139432E+04
  1.9018436E+04  1.8897875E+04  1.8777747E+04  1.8658053E+04
  1.8538792E+04  1.8419960E+04  1.8301559E+04  1.8183587E+04
  1.8066044E+04  1.7948927E+04  1.7832236E+04  1.7715971E+04
  1.7600130E+04  1.7484712E+04  1.7369717E+04  1.7255144E+04
  1.7140991E+04  1.7027258E+04  1.6913944E+04  1.6801049E+04
  1.6688570E+04  1.6576509E+04  1.6464863E+04  1.6353633E+04
  1.6242817E+04  1.6132414E+04  1.6022424E+04  1.5912846E+04
  1.5803680E+04  1.5694924E+04  1.5586578E+04  1.5478642E+04
  1.5371114E+04  1.5263993E+04  1.5157280E+04  1.5050975E+04
  1.4945074E+04  1.4839579E+04  1.4734489E+04  1.4629802E+04
  1.4525520E+04  1.4421640E+04  1.4318163E+04  1.4215087E+04
  1.4112413E+04  1.4010139E+04  1.3908266E+04  1.3806792E+04
  1.3705717E+04  1.3605041E+04  1.3504763E+04  1.3404882E+04
  1.3305398E+04  1.3206311E+04  1.3107621E+04  1.3009326E+04
  1.2911426E+04  1.2813921E+04  1.2716810E+04  1.2620093E+04
  1.2523770E+04  1.2427840E+04  1.2332303E+04  1.2237158E+04
  1.2142404E+04  1.2048042E+04  1.1954072E+04  1.1860491E+04
  1.1767301E+04  1.1674502E+04  1.1582092E+04  1.1490071E+04
  1.1398439E+04  1.1307197E+04  1.1216342E+04  1.1125875E+04
  1.1035796E+04  1.0946105E+04  1.0856800E+04  1.0767882E+04
  1.0679351E+04  1.0591206E+04  1.0503446E+04  1.0416073E+04
  1.0329085E+04  1.0242482E+04  1.0156263E+04  1.0070429E+04
  9.9849795E+03  9.8999145E+03  9.8152328E+03  9.7309343E+03
  9.6470198E+03  9.5634885E+03  9.4803390E+03  9.3975735E+03
  9.3151898E+03  9.2331878E+03  9.1515683E+03  9.0703305E+03
  8.9894745E+03  8.9089995E+03  8.8289063E+03  8.7491933E+03
  8.6698613E+03  8.5909095E+03  8.5123388E+03  8.4341475E+03
  8.3563365E+03  8.2789058E+03  8.2018538E+03  8.1251820E+03
  8.0488890E+03  7.9729755E+03  7.8974408E+03  7.8222840E+03
  7.7475068E+03  7.6731075E+03  7.5990863E+03  7.5254430E+03
  7.4521779E+03  7.3792904E+03  7.3067804E+03  7.2346477E+03
  7.1628921E+03  7.0915136E+03  7.0205120E+03  6.9498869E+03
  6.8796384E+03  6.8097662E+03  6.7402703E+03  6.6711503E+03
  6.6024061E+03  6.5340376E+03  6.4660445E+03  6.3984269E+03
  6.3311843E+03  6.2643167E+03  6.1978239E+03  6.1317057E+03
  6.0659620E+03  6.0005925E+03  5.9355972E+03  5.8709757E+03
  5.8067280E+03  5.7428538E+03  5.6793530E+03  5.6162252E+03
  5.5534706E+03  5.4910886E+03  5.4290793E+03  5.3674423E+03
  5.3061775E+03  5.2452847E+03  5.1847637E+03  5.1246141E+03
  5.0648360E+03  5.0054289E+03  4.9463928E+03  4.8877274E+03
  4.8294323E+03  4.7715076E+03  4.7139528E+03  4.6567677E+03
  4.5999522E+03  4.5435059E+03  4.4874286E+03  4.4317201E+03
  4.3763800E+03  4.3214081E+03  4.2668043E+03  4.2125681E+03
  4.1586993E+03  4.1051976E+03  4.0520627E+03  3.9992944E+03
  3.9468923E+03  3.8948560E+03  3.8431854E+03  3.7918801E+03
  3.7409398E+03  3.6903641E+03  3.6401526E+03  3.5903052E+03
  3.5408213E+03  3.4917008E+03  3.4429431E+03  3.3945479E+03
  3.3465149E+03  3.2988437E+03  3.2515338E+03  3.2045849E+03
  3.1579967E+03  3.1117685E+03  3.0659002E+03  3.0203912E+03
  2.9752410E+03  2.9304494E+03  2.8860157E+03  2.8419396E+03
  2.7982205E+03  2.7548582E+03  2.7118519E+03  2.6692013E+03
  2.6269058E+03  2.5849649E+03  2.5433783E+03  2.5021451E+03
  2.4612651E+03  2.4207376E+03  2.3805621E+03  2.3407379E+03
  2.3012647E+03  2.2621416E+03  2.2233683E+03  2.1849440E+03
  2.1468682E+03  2.1091403E+03  2.0717595E+03  2.0347253E+03
  1.9980371E+03  1.9616940E+03  1.9256957E+03  1.8900411E+03
  1.8547298E+03  1.8197611E+03  1.7851341E+03  1.7508482E+03
  1.7169026E+03  1.6832967E+03  1.6500296E+03  1.6171004E+03
  1.5845086E+03  1.5522533E+03  1.5203336E+03  1.4887487E+03
  1.4574980E+03  1.4265803E+03  1.3959950E+03  1.3657412E+03
  1.3358179E+03  1.3062242E+03  1.2769594E+03  1.2480224E+03
  1.2194123E+03  1.1911283E+03  1.1631692E+03  1.1355341E+03
  1.1082221E+03  1.0812321E+03  1.0545632E+03  1.0282144E+03
  1.0021844E+03  9.7647240E+02  9.5107733E+02  9.2599793E+02
  9.0123323E+02  8.7678203E+02  8.5264335E+02  8.2881585E+02
  8.0529855E+02  7.8209018E+02  7.5918960E+02  7.3659561E+02
  7.1430695E+02  6.9232241E+02  6.7064074E+02  6.4926068E+02
  6.2818094E+02  6.0740024E+02  5.8691725E+02  5.6673066E+02
  5.4683912E+02  5.2724127E+02  5.0793573E+02  4.8892112E+02
  4.7019601E+02  4.5175898E+02  4.3360860E+02  4.1574340E+02
  3.9816191E+02  3.8086262E+02  3.6384402E+02  3.4710460E+02
  3.3064279E+02  3.1445705E+02  2.9854577E+02  2.8290737E+02
  2.6754022E+02  2.5244270E+02  2.3761313E+02  2.2304986E+02
  2.0875119E+02  1.9471541E+02  1.8094079E+02  1.6742558E+02
  1.5416803E+02  1.4116634E+02  1.2841871E+02  1.1592330E+02
  1.0367830E+02  9.1681815E+01  7.9931985E+01  6.8426904E+01
  5.7164645E+01  4.6143269E+01  3.5360815E+01  2.4815301E+01
  1.4504726E+01  4.4270664E+00 -5.4197189E+00 -1.5037694E+01
 -2.4428942E+01 -3.3595568E+01 -4.2539697E+01 -5.1263477E+01
 -5.9769074E+01 -6.8058679E+01 -7.6134503E+01 -8.3998770E+01
 -9.1653750E+01 -9.9101700E+01 -1.0634493E+02 -1.1338575E+02
 -1.2022651E+02 -1.2686956E+02 -1.3331730E+02 -1.3957213E+02
 -1.4563648E+02 -1.5151280E+02 -1.5720358E+02 -1.6271131E+02
 -1.6803850E+02 -1.7318771E+02 -1.7816150E+02 -1.8296246E+02
 -1.8759321E+02 -1.9205639E+02 -1.9635465E+02 -2.0049068E+02
 -2.0446720E+02 -2.0828693E+02 -2.1195263E+02 -2.1546707E+02
 -2.1883308E+02 -2.2205348E+02 -2.2513111E+02 -2.2806887E+02
 -2.3086964E+02 -2.3353638E+02 -2.3607202E+02 -2.3847954E+02
 -2.4076195E+02 -2.4292228E+02 -2.4496358E+02 -2.4688894E+02
 -2.4870145E+02 -2.5040425E+02 -2.5200050E+02 -2.5349338E+02
 -2.5488610E+02 -2.5618190E+02 -2.5738403E+02 -2.5849579E+02
 -2.5952048E+02 -2.6046146E+02 -2.6132210E+02 -2.6210577E+02
 -2.6281592E+02 -2.6345598E+02 -2.6402943E+02 -2.6453978E+02
 -2.6499056E+02 -2.6538533E+02 -2.6572767E+02 -2.6602121E+02
 -2.6626956E+02 -2.6647643E+02 -2.6664548E+02 -2.6678046E+02
 -2.6688512E+02 -2.6696325E+02 -2.6701865E+02 -2.6705517E+02
 -2.6707667E+02 -2.6708705E+02 -2.6709024E+02 -2.6712061E+02
 -2.6711893E+02 -2.6711569E+02 -2.6711089E+02 -2.6710455E+02
 -2.6709666E+02 -2.6708723E+02 -2.6707627E+02 -2.6706377E+02
 -2.6704973E+02 -2.6703417E+02 -2.6701709E+02 -2.6699849E+02
 -2.6697836E+02 -2.6695673E+02 -2.6693358E+02 -2.6690893E+02
 -2.6688278E+02 -2.6685512E+02 -2.6682598E+02 -2.6679534E+02
 -2.6676321E+02 -2.6672960E+02 -2.6669450E+02 -2.6665793E+02
 -2.6661989E+02 -2.6658037E+02 -2.6653939E+02 -2.6649695E+02
 -2.6645303E+02 -2.6640767E+02 -2.6636086E+02 -2.6631260E+02
 -2.6626289E+02 -2.6621174E+02 -2.6615915E+02 -2.6610512E+02
 -2.6604966E+02 -2.6599278E+02 -2.6593447E+02 -2.6587475E+02
 -2.6581360E+02 -2.6575104E+02 -2.6568707E+02 -2.6562170E+02
 -2.6555492E+02 -2.6548674E+02 -2.6541716E+02 -2.6534620E+02
 -2.6527385E+02 -2.6520011E+02 -2.6512499E+02 -2.6504849E+02
 -2.6497062E+02 -2.6489138E+02 -2.6481077E+02 -2.6472879E+02
 -2.6464546E+02 -2.6456077E+02 -2.6447473E+02 -2.6438733E+02
 -2.6429859E+02 -2.6420852E+02 -2.6411710E+02 -2.6402434E+02
 -2.6393026E+02 -2.6383484E+02 -2.6373810E+02 -2.6364005E+02
 -2.6354067E+02 -2.6343998E+02 -2.6333798E+02 -2.6323467E+02
 -2.6313006E+02 -2.6302415E+02 -2.6291695E+02 -2.6280845E+02
 -2.6269867E+02 -2.6258759E+02 -2.6247524E+02 -2.6236161E+02
 -2.6224671E+02 -2.6213053E+02 -2.6201309E+02 -2.6189438E+02
 -2.6177441E+02 -2.6165319E+02 -2.6153071E+02 -2.6140698E+02
 -2.6128201E+02 -2.6115580E+02 -2.6102834E+02 -2.6089965E+02
 -2.6076973E+02 -2.6063858E+02 -2.6050621E+02 -2.6037261E+02
 -2.6023780E+02 -2.6010177E+02 -2.5996454E+02 -2.5982609E+02
 -2.5968644E+02 -2.5954560E+02 -2.5940356E+02 -2.5926032E+02
 -2.5911590E+02 -2.5897028E+02 -2.5882349E+02 -2.5867553E+02
 -2.5852638E+02 -2.5837607E+02 -2.5822458E+02 -2.5807193E+02
 -2.5791812E+02 -2.5776316E+02 -2.5760705E+02 -2.5744978E+02
 -2.5729136E+02 -2.5713180E+02 -2.5697111E+02 -2.5680928E+02
 -2.5664631E+02 -2.5648222E+02 -2.5631701E+02 -2.5615067E+02
 -2.5598321E+02 -2.5581464E+02 -2.5564496E+02 -2.5547417E+02
 -2.5530228E+02 -2.5512929E+02 -2.5495520E+02 -2.5478003E+02
 -2.5460375E+02 -2.5442640E+02 -2.5424797E+02 -2.5406845E+02
 -2.5388786E+02 -2.5370620E+02 -2.5352347E+02 -2.5333967E+02
 -2.5315482E+02 -2.5296891E+02 -2.5278194E+02 -2.5259393E+02
 -2.5240487E+02 -2.5221476E+02 -2.5202362E+02 -2.5183144E+02
 -2.5163822E+02 -2.5144399E+02 -2.5124872E+02 -2.5105244E+02
 -2.5085513E+02 -2.5065681E+02 -2.5045748E+02 -2.5025714E+02
 -2.5005580E+02 -2.4985346E+02 -2.4965012E+02 -2.4944579E+02
 -2.4924047E+02 -2.4903416E+02 -2.4882688E+02 -2.4861861E+02
 -2.4840937E+02 -2.4819915E+02 -2.4798797E+02 -2.4777583E+02
 -2.4756272E+02 -2.4734865E+02 -2.4713363E+02 -2.4691766E+02
 -2.4670075E+02 -2.4648289E+02 -2.4626409E+02 -2.4604436E+02
 -2.4582369E+02 -2.4560210E+02 -2.4537958E+02 -2.4515613E+02
 -2.4493178E+02 -2.4470650E+02 -2.4448031E+02 -2.4425322E+02
 -2.4402522E+02 -2.4379632E+02 -2.4356653E+02 -2.4333584E+02
 -2.4310427E+02 -2.4287180E+02 -2.4263846E+02 -2.4240423E+02
 -2.4216913E+02 -2.4193316E+02 -2.4169631E+02 -2.4145861E+02
 -2.4122004E+02 -2.4098062E+02 -2.4074034E+02 -2.4049921E+02
 -2.4025724E+02 -2.4001442E+02 -2.3977076E+02 -2.3952626E+02
 -2.3928094E+02 -2.3903478E+02 -2.3878780E+02 -2.3853999E+02
 -2.3829137E+02 -2.3804193E+02 -2.3779169E+02 -2.3754063E+02
 -2.3728877E+02 -2.3703611E+02 -2.3678265E+02 -2.3652840E+02
 -2.3627336E+02 -2.3601753E+02 -2.3576092E+02 -2.3550353E+02
 -2.3524536E+02 -2.3498642E+02 -2.3472672E+02 -2.3446625E+02
 -2.3420502E+02 -2.3394303E+02 -2.3368028E+02 -2.3341679E+02
 -2.3315255E+02 -2.3288756E+02 -2.3262184E+02 -2.3235537E+02
 -2.3208818E+02 -2.3182025E+02 -2.3155160E+02 -2.3128223E+02
 -2.3101214E+02 -2.3074133E+02 -2.3046982E+02 -2.3019760E+02
 -2.2992467E+02 -2.2965104E+02 -2.2937671E+02 -2.2910168E+02
 -2.2882598E+02 -2.2854958E+02 -2.2827250E+02 -2.2799474E+02
 -2.2771630E+02 -2.2743719E+02 -2.2715741E+02 -2.2687697E+02
 -2.2659587E+02 -2.2631411E+02 -2.2603169E+02 -2.2574862E+02
 -2.2546491E+02 -2.2518055E+02 -2.2489555E+02 -2.2460992E+02
 -2.2432364E+02 -2.2403675E+02 -2.2374923E+02 -2.2346108E+02
 -2.2317231E+02 -2.2288293E+02 -2.2259294E+02 -2.2230234E+02
 -2.2201114E+02 -2.2171933E+02 -2.2142693E+02 -2.2113393E+02
 -2.2084034E+02 -2.2054616E+02 -2.2025141E+02 -2.1995607E+02
 -2.1966016E+02 -2.1936367E+02 -2.1906662E+02 -2.1876899E+02
 -2.1847082E+02 -2.1817208E+02 -2.1787278E+02 -2.1757293E+02
 -2.1727254E+02 -2.1697160E+02 -2.1667013E+02 -2.1636811E+02
 -2.1606556E+02 -2.1576248E+02 -2.1545888E+02 -2.1515475E+02
 -2.1485011E+02 -2.1454494E+02 -2.1423927E+02 -2.1393309E+02
 -2.1362640E+02 -2.1331922E+02 -2.1301153E+02 -2.1270335E+02
 -2.1239468E+02 -2.1208552E+02 -2.1177588E+02 -2.1146576E+02
 -2.1115516E+02 -2.1084410E+02 -2.1053255E+02 -2.1022055E+02
 -2.0990808E+02 -2.0959516E+02 -2.0928178E+02 -2.0896795E+02
 -2.0865367E+02 -2.0833895E+02 -2.0802378E+02 -2.0770818E+02
 -2.0739215E+02 -2.0707568E+02 -2.0675879E+02 -2.0644148E+02
 -2.0612374E+02 -2.0580560E+02 -2.0548703E+02 -2.0516806E+02
 -2.0484869E+02 -2.0452891E+02 -2.0420873E+02 -2.0388817E+02
 -2.0356721E+02 -2.0324586E+02 -2.0292413E+02 -2.0260202E+02
 -2.0227954E+02 -2.0195668E+02 -2.0163344E+02 -2.0130985E+02
 -2.0098589E+02 -2.0066158E+02 -2.0033690E+02 -2.0001188E+02
 -1.9968651E+02 -1.9936080E+02 -1.9903475E+02 -1.9870835E+02
 -1.9838162E+02 -1.9805456E+02 -1.9772718E+02 -1.9739948E+02
 -1.9707145E+02 -1.9674311E+02 -1.9641445E+02 -1.9608548E+02
 -1.9575622E+02 -1.9542665E+02 -1.9509677E+02 -1.9476662E+02
 -1.9443616E+02 -1.9410542E+02 -1.9377439E+02 -1.9344308E+02
 -1.9311150E+02 -1.9277965E+02 -1.9244752E+02 -1.9211513E+02
 -1.9178247E+02 -1.9144956E+02 -1.9111639E+02 -1.9078297E+02
 -1.9044930E+02 -1.9011539E+02 -1.8978123E+02 -1.8944684E+02
 -1.8911222E+02 -1.8877736E+02 -1.8844228E+02 -1.8810697E+02
 -1.8777144E+02 -1.8743570E+02 -1.8709975E+02 -1.8676358E+02
 -1.8642721E+02 -1.8609064E+02 -1.8575387E+02 -1.8541691E+02
 -1.8507975E+02 -1.8474240E+02 -1.8440488E+02 -1.8406717E+02
 -1.8372929E+02 -1.8339122E+02 -1.8305300E+02 -1.8271460E+02
 -1.8237605E+02 -1.8203732E+02 -1.8169845E+02 -1.8135943E+02
 -1.8102026E+02 -1.8068094E+02 -1.8034148E+02 -1.8000188E+02
 -1.7966215E+02 -1.7932229E+02 -1.7898230E+02 -1.7864219E+02
 -1.7830196E+02 -1.7796161E+02 -1.7762114E+02 -1.7728058E+02
 -1.7693990E+02 -1.7659912E+02 -1.7625824E+02 -1.7591726E+02
 -1.7557620E+02 -1.7523505E+02 -1.7489381E+02 -1.7455250E+02
 -1.7421110E+02 -1.7386964E+02 -1.7352810E+02 -1.7318649E+02
 -1.7284483E+02 -1.7250310E+02 -1.7216132E+02 -1.7181948E+02
 -1.7147760E+02 -1.7113567E+02 -1.7079370E+02 -1.7045169E+02
 -1.7010965E+02 -1.6976757E+02 -1.6942547E+02 -1.6908335E+02
 -1.6874120E+02 -1.6839904E+02 -1.6805687E+02 -1.6771469E+02
 -1.6737249E+02 -1.6703030E+02 -1.6668811E+02 -1.6634592E+02
 -1.6600374E+02 -1.6566158E+02 -1.6531943E+02 -1.6497730E+02
 -1.6463519E+02 -1.6429310E+02 -1.6395105E+02 -1.6360903E+02
 -1.6326704E+02 -1.6292510E+02 -1.6258320E+02 -1.6224135E+02
 -1.6189955E+02 -1.6155781E+02 -1.6121612E+02 -1.6087449E+02
 -1.6053293E+02 -1.6019144E+02 -1.5985002E+02 -1.5950868E+02
 -1.5916742E+02 -1.5882623E+02 -1.5848514E+02 -1.5814414E+02
 -1.5780323E+02 -1.5746241E+02 -1.5712170E+02 -1.5678110E+02
 -1.5644060E+02 -1.5610021E+02 -1.5575994E+02 -1.5541979E+02
 -1.5507976E+02 -1.5473985E+02 -1.5440008E+02 -1.5406043E+02
 -1.5372092E+02 -1.5338156E+02 -1.5304234E+02 -1.5270326E+02
 -1.5236434E+02 -1.5202557E+02 -1.5168696E+02 -1.5134851E+02
 -1.5101023E+02 -1.5067211E+02 -1.5033416E+02 -1.4999640E+02
 -1.4965881E+02 -1.4932140E+02 -1.4898419E+02 -1.4864716E+02
 -1.4831032E+02 -1.4797368E+02 -1.4763725E+02 -1.4730101E+02
 -1.4696498E+02 -1.4662917E+02 -1.4629357E+02 -1.4595819E+02
 -1.4562303E+02 -1.4528810E+02 -1.4495339E+02 -1.4461892E+02
 -1.4428469E+02 -1.4395070E+02 -1.4361695E+02 -1.4328344E+02
 -1.4295019E+02 -1.4261719E+02 -1.4228445E+02 -1.4195197E+02
 -1.4161976E+02 -1.4128781E+02 -1.4095613E+02 -1.4062473E+02
 -1.4029361E+02 -1.3996277E+02 -1.3963223E+02 -1.3930196E+02
 -1.3897199E+02 -1.3864232E+02 -1.3831295E+02 -1.3798389E+02
 -1.3765513E+02 -1.3732668E+02 -1.3699855E+02 -1.3667074E+02
 -1.3634324E+02 -1.3601608E+02 -1.3568924E+02 -1.3536273E+02
 -1.3503656E+02 -1.3471073E+02 -1.3438525E+02 -1.3406011E+02
 -1.3373532E+02 -1.3341089E+02 -1.3308680E+02 -1.3276309E+02
 -1.3243974E+02 -1.3211675E+02 -1.3179414E+02 -1.3147190E+02
 -1.3115005E+02 -1.3082858E+02 -1.3050749E+02 -1.3018679E+02
 -1.2986648E+02 -1.2954657E+02 -1.2922706E+02 -1.2890795E+02
 -1.2858926E+02 -1.2827097E+02 -1.2795310E+02 -1.2763564E+02
 -1.2731861E+02 -1.2700200E+02 -1.2668582E+02 -1.2637007E+02
 -1.2605477E+02 -1.2573989E+02 -1.2542546E+02 -1.2511148E+02
 -1.2479795E+02 -1.2448487E+02 -1.2417226E+02 -1.2386010E+02
 -1.2354840E+02 -1.2323717E+02 -1.2292642E+02 -1.2261614E+02
 -1.2230634E+02 -1.2199702E+02 -1.2168818E+02 -1.2137984E+02
 -1.2107199E+02 -1.2076463E+02 -1.2045778E+02 -1.2015143E+02
 -1.1984558E+02 -1.1954025E+02 -1.1923544E+02 -1.1893113E+02
 -1.1862735E+02 -1.1832410E+02 -1.1802137E+02 -1.1771918E+02
 -1.1741752E+02 -1.1711640E+02 -1.1681583E+02 -1.1651580E+02
 -1.1621632E+02 -1.1591739E+02 -1.1561903E+02 -1.1532122E+02
 -1.1502397E+02 -1.1472729E+02 -1.1443119E+02 -1.1413566E+02
 -1.1384071E+02 -1.1354633E+02 -1.1325255E+02 -1.1295936E+02
 -1.1266676E+02 -1.1237475E+02 -1.1208335E+02 -1.1179254E+02
 -1.1150234E+02 -1.1121276E+02 -1.1092379E+02 -1.1063543E+02
 -1.1034770E+02 -1.1006060E+02 -1.0977411E+02 -1.0948826E+02
 -1.0920305E+02 -1.0891848E+02 -1.0863455E+02 -1.0835127E+02
 -1.0806863E+02 -1.0778666E+02 -1.0750533E+02 -1.0722467E+02
 -1.0694466E+02 -1.0666533E+02 -1.0638667E+02 -1.0610868E+02
 -1.0583138E+02 -1.0555475E+02 -1.0527881E+02 -1.0500356E+02
 -1.0472900E+02 -1.0445513E+02 -1.0418197E+02 -1.0390951E+02
 -1.0363775E+02 -1.0336671E+02 -1.0309638E+02 -1.0282676E+02
 -1.0255787E+02 -1.0228971E+02 -1.0202227E+02 -1.0175556E+02
 -1.0148959E+02 -1.0122436E+02 -1.0095986E+02 -1.0069612E+02
 -1.0043312E+02 -1.0017088E+02 -9.9909398E+01 -9.9648668E+01
 -9.9388710E+01 -9.9129510E+01 -9.8871090E+01 -9.8613443E+01
 -9.8359380E+01 -9.8103293E+01 -9.7847978E+01 -9.7593443E+01
 -9.7339680E+01 -9.7086683E+01 -9.6834458E+01 -9.6582990E+01
 -9.6332288E+01 -9.6082350E+01 -9.5833163E+01 -9.5584725E+01
 -9.5337045E+01 -9.5090115E+01 -9.4843928E+01 -9.4598483E+01
 -9.4353773E+01 -9.4109813E+01 -9.3866580E+01 -9.3624083E+01
 -9.3382320E+01 -9.3141278E+01 -9.2900963E+01 -9.2661375E+01
 -9.2422508E+01 -9.2184353E+01 -9.1946918E+01 -9.1710195E+01
 -9.1474185E+01 -9.1238880E+01 -9.1004288E+01 -9.0770393E+01
 -9.0537195E+01 -9.0304703E+01 -9.0072908E+01 -8.9841803E+01
 -8.9611388E+01 -8.9381663E+01 -8.9152628E+01 -8.8924275E+01
 -8.8696605E+01 -8.8469618E+01 -8.8243305E+01 -8.8017668E+01
 -8.7792698E+01 -8.7568403E+01 -8.7344775E+01 -8.7121815E+01
 -8.6899523E+01 -8.6677883E+01 -8.6456910E+01 -8.6236590E+01
 -8.6016930E+01 -8.5797915E+01 -8.5579553E+01 -8.5361843E+01
 -8.5144770E+01 -8.4928350E+01 -8.4712568E+01 -8.4497423E+01
 -8.4282915E+01 -8.4069045E+01 -8.3855813E+01 -8.3643203E+01
 -8.3431223E+01 -8.3219873E+01 -8.3009145E+01 -8.2799040E+01
 -8.2589558E+01 -8.2380690E+01 -8.2172438E+01 -8.1964800E+01
 -8.1757770E+01 -8.1551355E+01 -8.1345548E+01 -8.1140348E+01
 -8.0935748E+01 -8.0731755E+01 -8.0528355E+01 -8.0325555E+01
 -8.0123355E+01 -7.9921740E+01 -7.9720725E+01 -7.9520295E+01
 -7.9320450E+01 -7.9121198E+01 -7.8922523E+01 -7.8724433E+01
 -7.8526928E+01 -7.8329993E+01 -7.8133635E+01 -7.7937855E+01
 -7.7742645E+01 -7.7548005E+01 -7.7353928E+01 -7.7160420E+01
 -7.6967483E+01 -7.6775108E+01 -7.6583288E+01 -7.6392030E+01
 -7.6201328E+01 -7.6011180E+01 -7.5821588E+01 -7.5632543E+01
 -7.5444053E+01 -7.5256110E+01 -7.5068708E+01 -7.4881854E+01
 -7.4695543E+01 -7.4509772E+01 -7.4324539E+01 -7.4139844E+01
 -7.3955684E+01 -7.3772057E+01 -7.3588961E+01 -7.3406396E+01
 -7.3224360E+01 -7.3042850E+01 -7.2861863E+01 -7.2681401E+01
 -7.2501459E+01 -7.2322037E+01 -7.2143133E+01 -7.1964746E+01
 -7.1786872E+01 -7.1609511E+01 -7.1432661E+01 -7.1256320E+01
 -7.1080487E+01 -7.0905161E+01 -7.0730338E+01 -7.0556018E+01
 -7.0382199E+01 -7.0208879E+01 -7.0036058E+01 -6.9863732E+01
 -6.9691901E+01 -6.9520562E+01 -6.9349715E+01 -6.9179358E+01
 -6.9009488E+01 -6.8840105E+01 -6.8671208E+01 -6.8502793E+01
 -6.8334860E+01 -6.8167406E+01 -6.8000432E+01 -6.7833934E+01
 -6.7667912E+01 -6.7502363E+01 -6.7337288E+01 -6.7172682E+01
 -6.7008546E+01 -6.6844878E+01 -6.6681676E+01 -6.6518939E+01
 -6.6356664E+01 -6.6194852E+01 -6.6033500E+01 -6.5872606E+01
 -6.5712169E+01 -6.5552189E+01 -6.5392661E+01 -6.5233588E+01
 -6.5074965E+01 -6.4916792E+01 -6.4759068E+01 -6.4601790E+01
 -6.4444958E+01 -6.4288570E+01 -6.4132625E+01 -6.3977120E+01
 -6.3822056E+01 -6.3667429E+01 -6.3513240E+01 -6.3359486E+01
 -6.3206166E+01 -6.3053279E+01 -6.2900822E+01 -6.2748797E+01
 -6.2597199E+01 -6.2446028E+01 -6.2295284E+01 -6.2144963E+01
 -6.1995066E+01 -6.1845590E+01 -6.1696535E+01 -6.1547899E+01
 -6.1399680E+01 -6.1251877E+01 -6.1104490E+01 -6.0957515E+01
 -6.0810954E+01 -6.0664803E+01 -6.0519062E+01 -6.0373729E+01
 -6.0228803E+01 -6.0084283E+01 -5.9940167E+01 -5.9796455E+01
 -5.9653144E+01 -5.9510234E+01 -5.9367722E+01 -5.9225609E+01
 -5.9083893E+01 -5.8942572E+01 -5.8801646E+01 -5.8661112E+01
 -5.8520970E+01 -5.8381219E+01 -5.8241856E+01 -5.8102882E+01
 -5.7964295E+01 -5.7826092E+01 -5.7688274E+01 -5.7550840E+01
 -5.7413787E+01 -5.7277115E+01 -5.7140822E+01 -5.7004907E+01
 -5.6869370E+01 -5.6734208E+01 -5.6599421E+01 -5.6465006E+01
 -5.6330965E+01 -5.6197295E+01 -5.6063994E+01 -5.5931063E+01
 -5.5798498E+01 -5.5666301E+01 -5.5534468E+01 -5.5403000E+01
 -5.5271894E+01 -5.5141151E+01 -5.5010768E+01 -5.4880744E+01
 -5.4751079E+01 -5.4621771E+01 -5.4492820E+01 -5.4364223E+01
 -5.4235980E+01 -5.4108091E+01 -5.3980553E+01 -5.3853365E+01
 -5.3726527E+01 -5.3600037E+01 -5.3473895E+01 -5.3348099E+01
 -5.3222648E+01 -5.3097540E+01 -5.2972776E+01 -5.2848354E+01
 -5.2724273E+01 -5.2600531E+01 -5.2477128E+01 -5.2354063E+01
 -5.2231334E+01 -5.2108941E+01 -5.1986882E+01 -5.1865157E+01
 -5.1743764E+01 -5.1622702E+01 -5.1501971E+01 -5.1381569E+01
 -5.1261495E+01 -5.1141749E+01 -5.1022328E+01 -5.0903234E+01
 -5.0784463E+01 -5.0666015E+01 -5.0547890E+01 -5.0430085E+01
 -5.0312601E+01 -5.0195436E+01 -5.0078589E+01 -4.9962059E+01
 -4.9845846E+01 -4.9729949E+01 -4.9614365E+01 -4.9499094E+01
 -4.9384136E+01 -4.9269489E+01 -4.9155152E+01 -4.9041125E+01
 -4.8927407E+01 -4.8813996E+01 -4.8700892E+01 -4.8588093E+01
 -4.8475599E+01 -4.8363409E+01 -4.8251521E+01 -4.8139935E+01
 -4.8028651E+01 -4.7917666E+01 -4.7806980E+01 -4.7696593E+01
 -4.7586503E+01 -4.7476709E+01 -4.7367210E+01 -4.7258006E+01
 -4.7149097E+01 -4.7040479E+01 -4.6932153E+01 -4.6824118E+01
 -4.6716374E+01 -4.6608917E+01 -4.6501750E+01 -4.6394870E+01
 -4.6288277E+01 -4.6181969E+01 -4.6075946E+01 -4.5970206E+01
 -4.5864749E+01 -4.5759575E+01 -4.5654683E+01 -4.5550070E+01
 -4.5445737E+01 -4.5341683E+01 -4.5237906E+01 -4.5134407E+01
 -4.5031184E+01 -4.4928236E+01 -4.4825562E+01 -4.4723162E+01
 -4.4621035E+01 -4.4519180E+01 -4.4417596E+01 -4.4316282E+01
 -4.4215238E+01 -4.4114463E+01 -4.4013956E+01 -4.3913715E+01
 -4.3813741E+01 -4.3714031E+01 -4.3614587E+01 -4.3515407E+01
 -4.3416490E+01 -4.3317835E+01 -4.3219441E+01 -4.3121308E+01
 -4.3023435E+01 -4.2925820E+01 -4.2828465E+01 -4.2731366E+01
 -4.2634525E+01 -4.2537939E+01 -4.2441609E+01 -4.2345533E+01
 -4.2249710E+01 -4.2154141E+01 -4.2058823E+01 -4.1963757E+01
 -4.1868942E+01 -4.1774376E+01 -4.1680060E+01 -4.1585992E+01
 -4.1492171E+01 -4.1398598E+01 -4.1305270E+01 -4.1212187E+01
 -4.1119350E+01 -4.1026756E+01 -4.0934405E+01 -4.0842297E+01
 -4.0750431E+01 -4.0658806E+01 -4.0567421E+01 -4.0476275E+01
 -4.0385368E+01 -4.0294699E+01 -4.0204268E+01 -4.0114073E+01
 -4.0024115E+01 -3.9934391E+01 -3.9844902E+01 -3.9755648E+01
 -3.9666626E+01 -3.9577837E+01 -3.9489279E+01 -3.9400952E+01
 -3.9312857E+01 -3.9224990E+01 -3.9137353E+01 -3.9049944E+01
 -3.8962763E+01 -3.8875808E+01 -3.8789081E+01 -3.8702579E+01
 -3.8616301E+01 -3.8530248E+01 -3.8444419E+01 -3.8358812E+01
 -3.8273429E+01 -3.8188266E+01 -3.8103325E+01 -3.8018603E+01
 -3.7934102E+01 -3.7849820E+01 -3.7765756E+01 -3.7681910E+01
 -3.7598280E+01 -3.7514867E+01 -3.7431671E+01 -3.7348689E+01
 -3.7265922E+01 -3.7183369E+01 -3.7101029E+01 -3.7018901E+01
 -3.6936986E+01 -3.6855282E+01 -3.6773789E+01 -3.6692506E+01
 -3.6611432E+01 -3.6530568E+01 -3.6449912E+01 -3.6369464E+01
 -3.6289222E+01 -3.6209187E+01 -3.6129358E+01 -3.6049734E+01
 -3.5970314E+01 -3.5891099E+01 -3.5812088E+01 -3.5733278E+01
 -3.5654672E+01 -3.5576267E+01 -3.5498063E+01 -3.5420060E+01
 -3.5342256E+01 -3.5264652E+01 -3.5187247E+01 -3.5110040E+01
 -3.5033030E+01 -3.4956217E+01 -3.4879601E+01 -3.4803180E+01
 -3.4726955E+01 -3.4650924E+01 -3.4575088E+01 -3.4499445E+01
 -3.4423995E+01 -3.4348738E+01 -3.4273673E+01 -3.4198798E+01
 -3.4124115E+01 -3.4049621E+01 -3.3975318E+01 -3.3901204E+01
 -3.3827278E+01 -3.3753539E+01 -3.3679989E+01 -3.3606626E+01
 -3.3533449E+01 -3.3460457E+01 -3.3387651E+01 -3.3315030E+01
 -3.3242593E+01 -3.3170339E+01 -3.3098269E+01 -3.3026381E+01
 -3.2954676E+01 -3.2883152E+01 -3.2811809E+01 -3.2740647E+01
 -3.2669664E+01 -3.2598861E+01 -3.2528237E+01 -3.2457792E+01
 -3.2387525E+01 -3.2317434E+01 -3.2247521E+01 -3.2177784E+01
 -3.2108223E+01 -3.2038838E+01 -3.1969626E+01 -3.1900590E+01
 -3.1831727E+01 -3.1763039E+01 -3.1694522E+01 -3.1626178E+01
 -3.1558006E+01 -3.1490005E+01 -3.1422176E+01 -3.1354516E+01
 -3.1287026E+01 -3.1219706E+01 -3.1152555E+01 -3.1085573E+01
 -3.1018758E+01 -3.0952111E+01 -3.0885630E+01 -3.0819317E+01
 -3.0753169E+01 -3.0687187E+01 -3.0621370E+01 -3.0555717E+01
 -3.0490229E+01 -3.0424904E+01 -3.0359744E+01 -3.0294745E+01
 -3.0229909E+01 -3.0165234E+01 -3.0100721E+01 -3.0036369E+01
 -2.9972177E+01 -2.9908145E+01 -2.9844273E+01 -2.9780561E+01
 -2.9717006E+01 -2.9653610E+01 -2.9590371E+01 -2.9527290E+01
 -2.9464366E+01 -2.9401598E+01 -2.9338985E+01 -2.9276529E+01
 -2.9214227E+01 -2.9152080E+01 -2.9090088E+01 -2.9028249E+01
 -2.8966563E+01 -2.8905030E+01 -2.8843650E+01 -2.8782422E+01
 -2.8721345E+01 -2.8660419E+01 -2.8599644E+01 -2.8539020E+01
 -2.8478546E+01 -2.8418220E+01 -2.8358044E+01 -2.8298016E+01
 -2.8238137E+01 -2.8178405E+01 -2.8118821E+01 -2.8059383E+01
 -2.8000093E+01 -2.7940948E+01 -2.7881949E+01 -2.7823096E+01
 -2.7764387E+01 -2.7705822E+01 -2.7647402E+01 -2.7589125E+01
 -2.7530992E+01 -2.7473002E+01 -2.7415154E+01 -2.7357448E+01
 -2.7299883E+01 -2.7242460E+01 -2.7185178E+01 -2.7128036E+01
 -2.7071035E+01 -2.7014173E+01 -2.6957450E+01 -2.6900867E+01
 -2.6844421E+01 -2.6788114E+01 -2.6731945E+01 -2.6675913E+01
 -2.6620018E+01 -2.6564259E+01 -2.6508637E+01 -2.6453150E+01
 -2.6397800E+01 -2.6342584E+01 -2.6287502E+01 -2.6232556E+01
 -2.6177743E+01 -2.6123063E+01 -2.6068517E+01 -2.6014104E+01
 -2.5959824E+01 -2.5905674E+01 -2.5851657E+01 -2.5797772E+01
 -2.5744017E+01 -2.5690393E+01 -2.5636899E+01 -2.5583535E+01
 -2.5530301E+01 -2.5477196E+01 -2.5424219E+01 -2.5371372E+01
 -2.5318652E+01 -2.5266060E+01 -2.5213595E+01 -2.5161258E+01
 -2.5109048E+01 -2.5056963E+01 -2.5005005E+01 -2.4953171E+01
 -2.4901464E+01 -2.4849882E+01 -2.4798424E+01 -2.4747090E+01
 -2.4695881E+01 -2.4644795E+01 -2.4593831E+01 -2.4542992E+01
 -2.4492275E+01 -2.4441679E+01 -2.4391206E+01 -2.4340854E+01
 -2.4290624E+01 -2.4240514E+01 -2.4190525E+01 -2.4140657E+01
 -2.4090908E+01 -2.4041278E+01 -2.3991768E+01 -2.3942377E+01
 -2.3893104E+01 -2.3843950E+01 -2.3794913E+01 -2.3745995E+01
 -2.3697194E+01 -2.3648509E+01 -2.3599941E+01 -2.3551490E+01
 -2.3503154E+01 -2.3454934E+01 -2.3406830E+01 -2.3358840E+01
 -2.3310965E+01 -2.3263205E+01 -2.3215559E+01 -2.3168027E+01
 -2.3120609E+01 -2.3073303E+01 -2.3026110E+01 -2.2979030E+01
 -2.2932062E+01 -2.2885206E+01 -2.2838462E+01 -2.2791829E+01
 -2.2745307E+01 -2.2698896E+01 -2.2652596E+01 -2.2606405E+01
 -2.2560324E+01 -2.2514354E+01 -2.2468491E+01 -2.2422739E+01
 -2.2377095E+01 -2.2331558E+01 -2.2286131E+01 -2.2240811E+01
 -2.2195598E+01 -2.2150493E+01 -2.2105494E+01 -2.2060602E+01
 -2.2015817E+01 -2.1971138E+01 -2.1926564E+01 -2.1882095E+01
 -2.1837732E+01 -2.1793474E+01 -2.1749321E+01 -2.1705272E+01
 -2.1661326E+01 -2.1617485E+01 -2.1573747E+01 -2.1530112E+01
 -2.1486581E+01 -2.1443151E+01 -2.1399824E+01 -2.1356600E+01
 -2.1313477E+01 -2.1270455E+01 -2.1227536E+01 -2.1184717E+01
 -2.1141998E+01 -2.1099380E+01 -2.1056863E+01 -2.1014445E+01
 -2.0972127E+01 -2.0929908E+01 -2.0887789E+01 -2.0845768E+01
 -2.0803846E+01 -2.0762022E+01 -2.0720297E+01 -2.0678669E+01
 -2.0637138E+01 -2.0595705E+01 -2.0554369E+01 -2.0513130E+01
 -2.0471987E+01 -2.0430941E+01 -2.0389990E+01 -2.0349135E+01
 -2.0308376E+01 -2.0267711E+01 -2.0227142E+01 -2.0186668E+01
 -2.0146288E+01 -2.0106002E+01 -2.0065810E+01 -2.0025712E+01
 -1.9985707E+01 -1.9945796E+01 -1.9905977E+01 -1.9866251E+01
 -1.9826618E+01 -1.9787076E+01 -1.9747627E+01 -1.9708270E+01
 -1.9669004E+01 -1.9629829E+01 -1.9590745E+01 -1.9551752E+01
 -1.9512850E+01 -1.9474037E+01 -1.9435315E+01 -1.9396683E+01
 -1.9358140E+01 -1.9319687E+01 -1.9281322E+01 -1.9243046E+01
 -1.9204859E+01 -1.9166761E+01 -1.9128751E+01 -1.9090828E+01
 -1.9052993E+01 -1.9015246E+01 -1.8977585E+01 -1.8940013E+01
 -1.8902526E+01 -1.8865127E+01 -1.8827813E+01 -1.8790585E+01
 -1.8753443E+01 -1.8716387E+01 -1.8679417E+01 -1.8642531E+01
 -1.8605731E+01 -1.8569015E+01 -1.8532384E+01 -1.8495837E+01
 -1.8459374E+01 -1.8422995E+01 -1.8386699E+01 -1.8350487E+01
 -1.8314358E+01 -1.8278312E+01 -1.8242349E+01 -1.8206468E+01
 -1.8170670E+01 -1.8134954E+01 -1.8099320E+01 -1.8063767E+01
 -1.8028295E+01 -1.7992905E+01 -1.7957596E+01 -1.7922368E+01
 -1.7887220E+01 -1.7852153E+01 -1.7817166E+01 -1.7782259E+01
 -1.7747432E+01 -1.7712684E+01 -1.7678015E+01 -1.7643426E+01
 -1.7608916E+01 -1.7574484E+01 -1.7540131E+01 -1.7505856E+01
 -1.7471660E+01 -1.7437541E+01 -1.7403500E+01 -1.7369536E+01
 -1.7335650E+01 -1.7301841E+01 -1.7268108E+01 -1.7234453E+01
 -1.7200874E+01 -1.7167371E+01 -1.7133944E+01 -1.7100593E+01
 -1.7067319E+01 -1.7034119E+01 -1.7000995E+01 -1.6967946E+01
 -1.6934972E+01 -1.6902072E+01 -1.6869248E+01 -1.6836497E+01
 -1.6803821E+01 -1.6771218E+01 -1.6738690E+01 -1.6706234E+01
 -1.6673853E+01 -1.6641545E+01 -1.6609309E+01 -1.6577147E+01
 -1.6545056E+01 -1.6513039E+01 -1.6481094E+01 -1.6449221E+01
 -1.6417419E+01 -1.6385690E+01 -1.6354031E+01 -1.6322445E+01
 -1.6290929E+01 -1.6259485E+01 -1.6228111E+01 -1.6196808E+01
 -1.6165575E+01 -1.6134413E+01 -1.6103320E+01 -1.6072298E+01
 -1.6041344E+01 -1.6010461E+01 -1.5979647E+01 -1.5948902E+01
 -1.5918227E+01 -1.5887619E+01 -1.5857081E+01 -1.5826611E+01
 -1.5796209E+01 -1.5765875E+01 -1.5735610E+01 -1.5705412E+01
 -1.5675282E+01 -1.5645219E+01 -1.5615224E+01 -1.5585295E+01
 -1.5555433E+01 -1.5525638E+01 -1.5495910E+01 -1.5466248E+01
 -1.5436652E+01 -1.5407123E+01 -1.5377659E+01 -1.5348260E+01
 -1.5318928E+01 -1.5289661E+01 -1.5260459E+01 -1.5231322E+01
 -1.5202250E+01 -1.5173243E+01 -1.5144300E+01 -1.5115421E+01
 -1.5086607E+01 -1.5057857E+01 -1.5029171E+01 -1.5000548E+01
 -1.4971990E+01 -1.4943494E+01 -1.4915062E+01 -1.4886693E+01
 -1.4858387E+01 -1.4830144E+01 -1.4801963E+01 -1.4773844E+01
 -1.4745788E+01 -1.4717795E+01 -1.4689862E+01 -1.4661992E+01
 -1.4634184E+01 -1.4606437E+01 -1.4578751E+01 -1.4551127E+01
 -1.4523564E+01 -1.4496062E+01 -1.4468620E+01 -1.4441239E+01
 -1.4413918E+01 -1.4386658E+01 -1.4359457E+01 -1.4332317E+01
 -1.4305237E+01 -1.4278216E+01 -1.4251255E+01 -1.4224353E+01
 -1.4197511E+01 -1.4170727E+01 -1.4144003E+01 -1.4117336E+01
 -1.4090729E+01 -1.4064181E+01 -1.4037690E+01 -1.4011258E+01
 -1.3984884E+01 -1.3958568E+01 -1.3932309E+01 -1.3906109E+01
 -1.3879965E+01 -1.3853879E+01 -1.3827850E+01 -1.3801878E+01
 -1.3775963E+01 -1.3750105E+01 -1.3724303E+01 -1.3698558E+01
 -1.3672870E+01 -1.3647237E+01 -1.3621661E+01 -1.3596140E+01
 -1.3570675E+01 -1.3545266E+01 -1.3519912E+01 -1.3494614E+01
 -1.3469370E+01 -1.3444182E+01 -1.3419049E+01 -1.3393970E+01
 -1.3368947E+01 -1.3343978E+01 -1.3319063E+01 -1.3294202E+01
 -1.3269395E+01 -1.3244643E+01 -1.3219944E+01 -1.3195299E+01
 -1.3170708E+01 -1.3146170E+01 -1.3121686E+01 -1.3097255E+01
 -1.3072876E+01 -1.3048550E+01 -1.3024278E+01 -1.3000058E+01
 -1.2975890E+01 -1.2951776E+01 -1.2927713E+01 -1.2903702E+01
 -1.2879743E+01 -1.2855837E+01 -1.2831982E+01 -1.2808178E+01
 -1.2784427E+01 -1.2760727E+01 -1.2737077E+01 -1.2713479E+01
 -1.2689932E+01 -1.2666436E+01 -1.2642990E+01 -1.2619595E+01
 -1.2596251E+01 -1.2572957E+01 -1.2549713E+01 -1.2526520E+01
 -1.2503375E+01 -1.2480282E+01 -1.2457238E+01 -1.2434243E+01
 -1.2411299E+01 -1.2388403E+01 -1.2365557E+01 -1.2342760E+01
 -1.2320012E+01 -1.2297312E+01 -1.2274661E+01 -1.2252060E+01
 -1.2229507E+01 -1.2207002E+01 -1.2184545E+01 -1.2162137E+01
 -1.2139777E+01 -1.2117464E+01 -1.2095200E+01 -1.2072983E+01
 -1.2050814E+01 -1.2028692E+01 -1.2006617E+01 -1.1984591E+01
 -1.1962610E+01 -1.1940677E+01 -1.1918792E+01 -1.1896952E+01
 -1.1875160E+01 -1.1853413E+01 -1.1831714E+01 -1.1810060E+01
 -1.1788454E+01 -1.1766893E+01 -1.1745378E+01 -1.1723909E+01
 -1.1702486E+01 -1.1681108E+01 -1.1659775E+01 -1.1638489E+01
 -1.1617247E+01 -1.1596052E+01 -1.1574900E+01 -1.1553794E+01
 -1.1532734E+01 -1.1511717E+01 -1.1490745E+01 -1.1469818E+01
 -1.1448935E+01 -1.1428097E+01 -1.1407303E+01 -1.1386553E+01
 -1.1365847E+01 -1.1345185E+01 -1.1324567E+01 -1.1303992E+01
 -1.1283461E+01 -1.1262974E+01 -1.1242530E+01 -1.1222129E+01
 -1.1201771E+01 -1.1181457E+01 -1.1161185E+01 -1.1140957E+01
 -1.1120771E+01 -1.1100627E+01 -1.1080526E+01 -1.1060468E+01
 -1.1040452E+01 -1.1020479E+01 -1.1000547E+01 -1.0980658E+01
 -1.0960811E+01 -1.0941005E+01 -1.0921241E+01 -1.0901519E+01
 -1.0881838E+01 -1.0862198E+01 -1.0842600E+01 -1.0823043E+01
 -1.0803528E+01 -1.0784053E+01 -1.0764620E+01 -1.0745227E+01
 -1.0725875E+01 -1.0706564E+01 -1.0687292E+01 -1.0668062E+01
 -1.0648872E+01 -1.0629722E+01 -1.0610612E+01 -1.0591543E+01
 -1.0572514E+01 -1.0553524E+01 -1.0534574E+01 -1.0515664E+01
 -1.0496793E+01 -1.0477962E+01 -1.0459170E+01 -1.0440418E+01
 -1.0421705E+01 -1.0403030E+01 -1.0384395E+01 -1.0365800E+01
 -1.0347242E+01 -1.0328723E+01 -1.0310243E+01 -1.0291802E+01
 -1.0273400E+01 -1.0255035E+01 -1.0236709E+01 -1.0218421E+01
 -1.0200171E+01 -1.0181959E+01 -1.0163785E+01 -1.0145649E+01
 -1.0127550E+01 -1.0109489E+01 -1.0091467E+01 -1.0073481E+01
 -1.0055533E+01 -1.0037621E+01 -1.0019748E+01 -1.0001911E+01
 -9.9841118E+00 -9.9663488E+00 -9.9486233E+00 -9.9309338E+00
 -9.9132818E+00 -9.8956658E+00 -9.8780865E+00 -9.8605433E+00
 -9.8430368E+00 -9.8255670E+00 -9.8081325E+00 -9.7907348E+00
 -9.7733730E+00 -9.7560465E+00 -9.7387560E+00 -9.7215015E+00
 -9.7042830E+00 -9.6870998E+00 -9.6699518E+00 -9.6528390E+00
 -9.6357623E+00 -9.6187200E+00 -9.6017138E+00 -9.5847420E+00
 -9.5678055E+00 -9.5509035E+00 -9.5340368E+00 -9.5172045E+00
 -9.5004068E+00 -9.4836443E+00 -9.4669155E+00 -9.4502213E+00
 -9.4335615E+00 -9.4169363E+00 -9.4003448E+00 -9.3837878E+00
 -9.3672645E+00 -9.3507750E+00 -9.3343200E+00 -9.3178980E+00
 -9.3015105E+00 -9.2851560E+00 -9.2688353E+00 -9.2525483E+00
 -9.2362943E+00 -9.2200733E+00 -9.2038860E+00 -9.1877318E+00
 -9.1716105E+00 -9.1555223E+00 -9.1394670E+00 -9.1234448E+00
 -9.1074548E+00 -9.0914985E+00 -9.0755738E+00 -9.0596820E+00
 -9.0438225E+00 -9.0279953E+00 -9.0122010E+00 -8.9964383E+00
 -8.9807078E+00 -8.9650095E+00 -8.9493435E+00 -8.9337090E+00
 -8.9181068E+00 -8.9025360E+00 -8.8869968E+00 -8.8714898E+00
 -8.8560143E+00 -8.8405695E+00 -8.8251570E+00 -8.8097753E+00
 -8.7944250E+00 -8.7791063E+00 -8.7638183E+00 -8.7485610E+00
 -8.7333353E+00 -8.7181403E+00 -8.7029760E+00 -8.6878425E+00
 -8.6727398E+00 -8.6576678E+00 -8.6426265E+00 -8.6276153E+00
 -8.6126348E+00 -8.5976843E+00 -8.5827638E+00 -8.5678740E+00
 -8.5530143E+00 -8.5381845E+00 -8.5233855E+00 -8.5086158E+00
 -8.4938753E+00 -8.4791655E+00 -8.4644850E+00 -8.4498345E+00
 -8.4352133E+00 -8.4206213E+00 -8.4060593E+00 -8.3915265E+00
 -8.3770223E+00 -8.3625480E+00 -8.3481030E+00 -8.3336873E+00
 -8.3193000E+00 -8.3049420E+00 -8.2906125E+00 -8.2763123E+00
 -8.2620413E+00 -8.2477980E+00 -8.2335840E+00 -8.2193985E+00
 -8.2052408E+00 -8.1911123E+00 -8.1770123E+00 -8.1629400E+00
 -8.1488963E+00 -8.1348810E+00 -8.1208935E+00 -8.1069338E+00
 -8.0930025E+00 -8.0790990E+00 -8.0652233E+00 -8.0513753E+00
 -8.0375550E+00 -8.0237625E+00 -8.0099978E+00 -7.9962608E+00
 -7.9825508E+00 -7.9688685E+00 -7.9552133E+00 -7.9415858E+00
 -7.9279853E+00 -7.9144118E+00 -7.9008653E+00 -7.8873465E+00
 -7.8738540E+00 -7.8603885E+00 -7.8469500E+00 -7.8335385E+00
 -7.8201533E+00 -7.8067950E+00 -7.7934638E+00 -7.7801588E+00
 -7.7668800E+00 -7.7536275E+00 -7.7404020E+00 -7.7272028E+00
 -7.7140290E+00 -7.7008823E+00 -7.6877610E+00 -7.6746660E+00
 -7.6615973E+00 -7.6485548E+00 -7.6355378E+00 -7.6225463E+00
 -7.6095810E+00 -7.5966413E+00 -7.5837278E+00 -7.5708390E+00
 -7.5579765E+00 -7.5451395E+00 -7.5323273E+00 -7.5195405E+00
 -7.5067793E+00 -7.4940436E+00 -7.4813328E+00 -7.4686472E+00
 -7.4559867E+00 -7.4433512E+00 -7.4307407E+00 -7.4181551E+00
 -7.4055944E+00 -7.3930586E+00 -7.3805474E+00 -7.3680609E+00
 -7.3555991E+00 -7.3431618E+00 -7.3307491E+00 -7.3183608E+00
 -7.3059970E+00 -7.2936575E+00 -7.2813424E+00 -7.2690515E+00
 -7.2567848E+00 -7.2445421E+00 -7.2323237E+00 -7.2201293E+00
 -7.2079588E+00 -7.1958122E+00 -7.1836896E+00 -7.1715908E+00
 -7.1595157E+00 -7.1474643E+00 -7.1354366E+00 -7.1234325E+00
 -7.1114519E+00 -7.0994949E+00 -7.0875614E+00 -7.0756511E+00
 -7.0637643E+00 -7.0519007E+00 -7.0400604E+00 -7.0282433E+00
 -7.0164493E+00 -7.0046783E+00 -6.9929305E+00 -6.9812055E+00
 -6.9695036E+00 -6.9578245E+00 -6.9461682E+00 -6.9345347E+00
 -6.9229239E+00 -6.9113358E+00 -6.8997704E+00 -6.8882275E+00
 -6.8767071E+00 -6.8652092E+00 -6.8537337E+00 -6.8422806E+00
 -6.8308498E+00 -6.8194413E+00 -6.8080550E+00 -6.7966909E+00
 -6.7853489E+00 -6.7740290E+00 -6.7627310E+00 -6.7514552E+00
 -6.7402012E+00 -6.7289690E+00 -6.7177588E+00 -6.7065703E+00
 -6.6954035E+00 -6.6842585E+00 -6.6731351E+00 -6.6620332E+00
 -6.6509529E+00 -6.6398941E+00 -6.6288567E+00 -6.6178408E+00
 -6.6068462E+00 -6.5958728E+00 -6.5849208E+00 -6.5739899E+00
 -6.5630803E+00 -6.5521917E+00 -6.5413242E+00 -6.5304778E+00
 -6.5196523E+00 -6.5088477E+00 -6.4980641E+00 -6.4873012E+00
 -6.4765592E+00 -6.4658378E+00 -6.4551373E+00 -6.4444573E+00
 -6.4337980E+00 -6.4231592E+00 -6.4125410E+00 -6.4019432E+00
 -6.3913658E+00 -6.3808088E+00 -6.3702722E+00 -6.3597559E+00
 -6.3492598E+00 -6.3387839E+00 -6.3283282E+00 -6.3178926E+00
 -6.3074771E+00 -6.2970815E+00 -6.2867060E+00 -6.2763504E+00
 -6.2660147E+00 -6.2556989E+00 -6.2454029E+00 -6.2351266E+00
 -6.2248700E+00 -6.2146332E+00 -6.2044160E+00 -6.1942183E+00
 -6.1840402E+00 -6.1738817E+00 -6.1637425E+00 -6.1536228E+00
 -6.1435225E+00 -6.1334415E+00 -6.1233798E+00 -6.1133374E+00
 -6.1033142E+00 -6.0933101E+00 -6.0833252E+00 -6.0733593E+00
 -6.0634124E+00 -6.0534847E+00 -6.0435758E+00 -6.0336859E+00
 -6.0238148E+00 -6.0139626E+00 -6.0041291E+00 -5.9943145E+00
 -5.9845185E+00 -5.9747412E+00 -5.9649826E+00 -5.9552425E+00
 -5.9455210E+00 -5.9358179E+00 -5.9261334E+00 -5.9164673E+00
 -5.9068196E+00 -5.8971902E+00 -5.8875791E+00 -5.8779863E+00
 -5.8684118E+00 -5.8588554E+00 -5.8493172E+00 -5.8397971E+00
 -5.8302950E+00 -5.8208111E+00 -5.8113450E+00 -5.8018970E+00
 -5.7924668E+00 -5.7830546E+00 -5.7736601E+00 -5.7642835E+00
 -5.7549246E+00 -5.7455835E+00 -5.7362600E+00 -5.7269542E+00
 -5.7176660E+00 -5.7083954E+00 -5.6991422E+00 -5.6899067E+00
 -5.6806885E+00 -5.6714878E+00 -5.6623044E+00 -5.6531384E+00
 -5.6439897E+00 -5.6348582E+00 -5.6257441E+00 -5.6166470E+00
 -5.6075672E+00 -5.5985045E+00 -5.5894588E+00 -5.5804302E+00
 -5.5714186E+00 -5.5624240E+00 -5.5534463E+00 -5.5444856E+00
 -5.5355416E+00 -5.5266145E+00 -5.5177042E+00 -5.5088107E+00
 -5.4999338E+00 -5.4910737E+00 -5.4822302E+00 -5.4734033E+00
 -5.4645930E+00 -5.4557993E+00 -5.4470220E+00 -5.4382612E+00
 -5.4295169E+00 -5.4207889E+00 -5.4120773E+00 -5.4033821E+00
 -5.3947031E+00 -5.3860403E+00 -5.3773939E+00 -5.3687636E+00
 -5.3601494E+00 -5.3515514E+00 -5.3429695E+00 -5.3344036E+00
 -5.3258537E+00 -5.3173199E+00 -5.3088020E+00 -5.3003000E+00
 -5.2918138E+00 -5.2833435E+00 -5.2748891E+00 -5.2664504E+00
 -5.2580274E+00 -5.2496201E+00 -5.2412286E+00 -5.2328527E+00
 -5.2244924E+00 -5.2161476E+00 -5.2078185E+00 -5.1995048E+00
 -5.1912066E+00 -5.1829239E+00 -5.1746566E+00 -5.1664046E+00
 -5.1581681E+00 -5.1499468E+00 -5.1417407E+00 -5.1335500E+00
 -5.1253745E+00 -5.1172142E+00 -5.1090689E+00 -5.1009389E+00
 -5.0928239E+00 -5.0847240E+00 -5.0766391E+00 -5.0685692E+00
 -5.0605143E+00 -5.0524743E+00 -5.0444492E+00 -5.0364389E+00
 -5.0284436E+00 -5.0204630E+00 -5.0124971E+00 -5.0045460E+00
 -4.9966097E+00 -4.9886879E+00 -4.9807809E+00 -4.9728885E+00
 -4.9650107E+00 -4.9571474E+00 -4.9492986E+00 -4.9414643E+00
 -4.9336445E+00 -4.9258391E+00 -4.9180482E+00 -4.9102716E+00
 -4.9025093E+00 -4.8947614E+00 -4.8870278E+00 -4.8793083E+00
 -4.8716032E+00 -4.8639122E+00 -4.8562353E+00 -4.8485726E+00
 -4.8409241E+00 -4.8332895E+00 -4.8256691E+00 -4.8180626E+00
 -4.8104701E+00 -4.8028916E+00 -4.7953270E+00 -4.7877763E+00
 -4.7802395E+00 -4.7727164E+00 -4.7652072E+00 -4.7577119E+00
 -4.7502302E+00 -4.7427623E+00 -4.7353080E+00 -4.7278674E+00
 -4.7204405E+00 -4.7130272E+00 -4.7056274E+00 -4.6982412E+00
 -4.6908685E+00 -4.6835093E+00 -4.6761636E+00 -4.6688313E+00
 -4.6615124E+00 -4.6542070E+00 -4.6469148E+00 -4.6396360E+00
 -4.6323705E+00 -4.6251182E+00 -4.6178792E+00 -4.6106535E+00
 -4.6034409E+00 -4.5962414E+00 -4.5890552E+00 -4.5818819E+00
 -4.5747218E+00 -4.5675748E+00 -4.5604407E+00 -4.5533197E+00
 -4.5462116E+00 -4.5391164E+00 -4.5320342E+00 -4.5249649E+00
 -4.5179084E+00 -4.5108647E+00 -4.5038339E+00 -4.4968159E+00
 -4.4898106E+00 -4.4828180E+00 -4.4758382E+00 -4.4688710E+00
 -4.4619164E+00 -4.4549745E+00 -4.4480452E+00 -4.4411285E+00
 -4.4342243E+00 -4.4273326E+00 -4.4204534E+00 -4.4135867E+00
 -4.4067324E+00 -4.3998905E+00 -4.3930610E+00 -4.3862439E+00
 -4.3794392E+00 -4.3726467E+00 -4.3658665E+00 -4.3590986E+00
 -4.3523429E+00 -4.3455995E+00 -4.3388682E+00 -4.3321491E+00
 -4.3254421E+00 -4.3187472E+00 -4.3120645E+00 -4.3053938E+00
 -4.2987350E+00 -4.2920884E+00 -4.2854537E+00 -4.2788310E+00
 -4.2722202E+00 -4.2656213E+00 -4.2590344E+00 -4.2524592E+00
 -4.2458960E+00 -4.2393445E+00 -4.2328048E+00 -4.2262769E+00
 -4.2197607E+00 -4.2132563E+00 -4.2067635E+00 -4.2002825E+00
 -4.1938130E+00 -4.1873552E+00 -4.1809090E+00 -4.1744744E+00
 -4.1680513E+00 -4.1616397E+00 -4.1552396E+00 -4.1488511E+00
 -4.1424740E+00 -4.1361083E+00 -4.1297540E+00 -4.1234111E+00
 -4.1170796E+00 -4.1107593E+00 -4.1044505E+00 -4.0981529E+00
 -4.0918666E+00 -4.0855915E+00 -4.0793276E+00 -4.0730750E+00
 -4.0668335E+00 -4.0606033E+00 -4.0543841E+00 -4.0481760E+00
 -4.0419791E+00 -4.0357931E+00 -4.0296182E+00 -4.0234544E+00
 -4.0173016E+00 -4.0111597E+00 -4.0050287E+00 -3.9989087E+00
 -3.9927997E+00 -3.9867014E+00 -3.9806141E+00 -3.9745376E+00
 -3.9684719E+00 -3.9624170E+00 -3.9563729E+00 -3.9503396E+00
 -3.9443170E+00 -3.9383051E+00 -3.9323039E+00 -3.9263132E+00
 -3.9203333E+00 -3.9143641E+00 -3.9084053E+00 -3.9024572E+00
 -3.8965197E+00 -3.8905927E+00 -3.8846762E+00 -3.8787702E+00
 -3.8728747E+00 -3.8669896E+00 -3.8611149E+00 -3.8552507E+00
 -3.8493968E+00 -3.8435534E+00 -3.8377202E+00 -3.8318974E+00
 -3.8260849E+00 -3.8202827E+00 -3.8144907E+00 -3.8087090E+00
 -3.8029375E+00 -3.7971762E+00 -3.7914251E+00 -3.7856841E+00
 -3.7799533E+00 -3.7742326E+00 -3.7685220E+00 -3.7628215E+00
 -3.7571310E+00 -3.7514506E+00 -3.7457801E+00 -3.7401197E+00
 -3.7344693E+00 -3.7288288E+00 -3.7231982E+00 -3.7175777E+00
 -3.7119669E+00 -3.7063661E+00 -3.7007750E+00 -3.6951939E+00
 -3.6896225E+00 -3.6840610E+00 -3.6785093E+00 -3.6729672E+00
 -3.6674350E+00 -3.6619124E+00 -3.6563996E+00 -3.6508964E+00
 -3.6454029E+00 -3.6399190E+00 -3.6344447E+00 -3.6289801E+00
 -3.6235250E+00 -3.6180796E+00 -3.6126436E+00 -3.6072172E+00
 -3.6018002E+00 -3.5963928E+00 -3.5909948E+00 -3.5856064E+00
 -3.5802273E+00 -3.5748576E+00 -3.5694974E+00 -3.5641464E+00
 -3.5588049E+00 -3.5534727E+00 -3.5481498E+00 -3.5428362E+00
 -3.5375319E+00 -3.5322368E+00 -3.5269511E+00 -3.5216744E+00
 -3.5164071E+00 -3.5111489E+00 -3.5058999E+00 -3.5006600E+00
 -3.4954293E+00 -3.4902077E+00 -3.4849952E+00 -3.4797918E+00
 -3.4745975E+00 -3.4694121E+00 -3.4642358E+00 -3.4590686E+00
 -3.4539102E+00 -3.4487609E+00 -3.4436206E+00 -3.4384891E+00
 -3.4333666E+00 -3.4282530E+00 -3.4231483E+00 -3.4180524E+00
 -3.4129654E+00 -3.4078872E+00 -3.4028178E+00 -3.3977573E+00
 -3.3927054E+00 -3.3876624E+00 -3.3826281E+00 -3.3776025E+00
 -3.3725857E+00 -3.3675775E+00 -3.3625780E+00 -3.3575872E+00
 -3.3526049E+00 -3.3476314E+00 -3.3426664E+00 -3.3377100E+00
 -3.3327623E+00 -3.3278230E+00 -3.3228923E+00 -3.3179701E+00
 -3.3130564E+00 -3.3081512E+00 -3.3032544E+00 -3.2983661E+00
 -3.2934863E+00 -3.2886149E+00 -3.2837519E+00 -3.2788973E+00
 -3.2740510E+00 -3.2692131E+00 -3.2643836E+00 -3.2595623E+00
 -3.2547494E+00 -3.2499447E+00 -3.2451483E+00 -3.2403602E+00
 -3.2355803E+00 -3.2308087E+00 -3.2260452E+00 -3.2212900E+00
 -3.2165429E+00 -3.2118040E+00 -3.2070732E+00 -3.2023505E+00
 -3.1976360E+00 -3.1929296E+00 -3.1882312E+00 -3.1835409E+00
 -3.1788587E+00 -3.1741844E+00 -3.1695182E+00 -3.1648601E+00
 -3.1602098E+00 -3.1555676E+00 -3.1509333E+00 -3.1463069E+00
 -3.1416885E+00 -3.1370780E+00 -3.1324754E+00 -3.1278806E+00
 -3.1232937E+00 -3.1187147E+00 -3.1141434E+00 -3.1095800E+00
 -3.1050244E+00 -3.1004766E+00 -3.0959366E+00 -3.0914042E+00
 -3.0868797E+00 -3.0823628E+00 -3.0778538E+00 -3.0733523E+00
 -3.0688586E+00 -3.0643724E+00 -3.0598940E+00 -3.0554232E+00
 -3.0509600E+00 -3.0465044E+00 -3.0420565E+00 -3.0376160E+00
 -3.0331832E+00 -3.0287579E+00 -3.0243401E+00 -3.0199298E+00
 -3.0155270E+00 -3.0111318E+00 -3.0067440E+00 -3.0023636E+00
 -2.9979908E+00 -2.9936252E+00 -2.9892672E+00 -2.9849165E+00
 -2.9805733E+00 -2.9762373E+00 -2.9719088E+00 -2.9675876E+00
 -2.9632737E+00 -2.9589671E+00 -2.9546679E+00 -2.9503759E+00
 -2.9460912E+00 -2.9418137E+00 -2.9375435E+00 -2.9332806E+00
 -2.9290248E+00 -2.9247763E+00 -2.9205349E+00 -2.9163008E+00
 -2.9120737E+00 -2.9078538E+00 -2.9036411E+00 -2.8994354E+00
 -2.8952369E+00 -2.8910455E+00 -2.8868611E+00 -2.8826838E+00
 -2.8785135E+00 -2.8743503E+00 -2.8701941E+00 -2.8660450E+00
 -2.8619028E+00 -2.8577676E+00 -2.8536394E+00 -2.8495181E+00
 -2.8454038E+00 -2.8412963E+00 -2.8371959E+00 -2.8331023E+00
 -2.8290156E+00 -2.8249358E+00 -2.8208628E+00 -2.8167967E+00
 -2.8127375E+00 -2.8086850E+00 -2.8046393E+00 -2.8006005E+00
 -2.7965684E+00 -2.7925432E+00 -2.7885246E+00 -2.7845129E+00
 -2.7805078E+00 -2.7765095E+00 -2.7725178E+00 -2.7685329E+00
 -2.7645546E+00 -2.7605831E+00 -2.7566181E+00 -2.7526598E+00
 -2.7487082E+00 -2.7447632E+00 -2.7408247E+00 -2.7368929E+00
 -2.7329676E+00 -2.7290489E+00 -2.7251367E+00 -2.7212312E+00
 -2.7173321E+00 -2.7134395E+00 -2.7095534E+00 -2.7056739E+00
 -2.7018008E+00 -2.6979341E+00 -2.6940740E+00 -2.6902203E+00
 -2.6863730E+00 -2.6825321E+00 -2.6786976E+00 -2.6748695E+00
 -2.6710478E+00 -2.6672325E+00 -2.6634236E+00 -2.6596209E+00
 -2.6558246E+00 -2.6520347E+00 -2.6482510E+00 -2.6444736E+00
 -2.6407025E+00 -2.6369378E+00 -2.6331792E+00 -2.6294269E+00
 -2.6256809E+00 -2.6219410E+00 -2.6182073E+00 -2.6144799E+00
 -2.6107587E+00 -2.6070437E+00 -2.6033348E+00 -2.5996320E+00
 -2.5959354E+00 -2.5922450E+00 -2.5885606E+00 -2.5848824E+00
 -2.5812102E+00 -2.5775441E+00 -2.5738841E+00 -2.5702302E+00
 -2.5665824E+00 -2.5629405E+00 -2.5593047E+00 -2.5556750E+00
 -2.5520512E+00 -2.5484333E+00 -2.5448216E+00 -2.5412157E+00
 -2.5376159E+00 -2.5340219E+00 -2.5304339E+00 -2.5268519E+00
 -2.5232757E+00 -2.5197054E+00 -2.5161411E+00 -2.5125826E+00
 -2.5090300E+00 -2.5054832E+00 -2.5019423E+00 -2.4984073E+00
 -2.4948780E+00 -2.4913546E+00 -2.4878370E+00 -2.4843251E+00
 -2.4808191E+00 -2.4773189E+00 -2.4738243E+00 -2.4703355E+00
 -2.4668525E+00 -2.4633752E+00 -2.4599036E+00 -2.4564378E+00
 -2.4529776E+00 -2.4495231E+00 -2.4460743E+00 -2.4426311E+00
 -2.4391937E+00 -2.4357618E+00 -2.4323356E+00 -2.4289150E+00
 -2.4254999E+00 -2.4220906E+00 -2.4186868E+00 -2.4152885E+00
 -2.4118959E+00 -2.4085088E+00 -2.4051272E+00 -2.4017513E+00
 -2.3983808E+00 -2.3950158E+00 -2.3916563E+00 -2.3883023E+00
 -2.3849539E+00 -2.3816109E+00 -2.3782733E+00 -2.3749412E+00
 -2.3716146E+00 -2.3682935E+00 -2.3649776E+00 -2.3616673E+00
 -2.3583623E+00 -2.3550628E+00 -2.3517686E+00 -2.3484798E+00
 -2.3451964E+00 -2.3419183E+00 -2.3386455E+00 -2.3353781E+00
 -2.3321160E+00 -2.3288593E+00 -2.3256078E+00 -2.3223617E+00
 -2.3191208E+00 -2.3158852E+00 -2.3126548E+00 -2.3094297E+00
 -2.3062099E+00 -2.3029953E+00 -2.2997859E+00 -2.2965818E+00
 -2.2933828E+00 -2.2901891E+00 -2.2870005E+00 -2.2838171E+00
 -2.2806389E+00 -2.2774658E+00 -2.2742979E+00 -2.2711352E+00
 -2.2679775E+00 -2.2648250E+00 -2.2616776E+00 -2.2585352E+00
 -2.2553980E+00 -2.2522659E+00 -2.2491389E+00 -2.2460168E+00
 -2.2428999E+00 -2.2397880E+00 -2.2366811E+00 -2.2335793E+00
 -2.2304825E+00 -2.2273907E+00 -2.2243039E+00 -2.2212221E+00
 -2.2181452E+00 -2.2150733E+00 -2.2120064E+00 -2.2089445E+00
 -2.2058875E+00 -2.2028354E+00 -2.1997883E+00 -2.1967460E+00
 -2.1937087E+00 -2.1906763E+00 -2.1876487E+00 -2.1846260E+00
 -2.1816083E+00 -2.1785954E+00 -2.1755873E+00 -2.1725840E+00
 -2.1695857E+00 -2.1665921E+00 -2.1636034E+00 -2.1606194E+00
 -2.1576403E+00 -2.1546659E+00 -2.1516964E+00 -2.1487316E+00
 -2.1457715E+00 -2.1428163E+00 -2.1398657E+00 -2.1369200E+00
 -2.1339789E+00 -2.1310426E+00 -2.1281110E+00 -2.1251840E+00
 -2.1222619E+00 -2.1193443E+00 -2.1164315E+00 -2.1135233E+00
 -2.1106198E+00 -2.1077209E+00 -2.1048266E+00 -2.1019370E+00
 -2.0990521E+00 -2.0961718E+00 -2.0932960E+00 -2.0904249E+00
 -2.0875583E+00 -2.0846964E+00 -2.0818390E+00 -2.0789862E+00
 -2.0761379E+00 -2.0732942E+00 -2.0704551E+00 -2.0676205E+00
 -2.0647904E+00 -2.0619648E+00 -2.0591438E+00 -2.0563271E+00
 -2.0535151E+00 -2.0507075E+00 -2.0479044E+00 -2.0451058E+00
 -2.0423116E+00 -2.0395219E+00 -2.0367366E+00 -2.0339558E+00
 -2.0311793E+00 -2.0284073E+00 -2.0256398E+00 -2.0228765E+00
 -2.0201178E+00 -2.0173634E+00 -2.0146134E+00 -2.0118677E+00
 -2.0091265E+00 -2.0063896E+00 -2.0036570E+00 -2.0009288E+00
 -1.9982048E+00 -1.9954853E+00 -1.9927700E+00 -1.9900591E+00
 -1.9873525E+00 -1.9846501E+00 -1.9819520E+00 -1.9792583E+00
 -1.9765688E+00 -1.9738835E+00 -1.9712025E+00 -1.9685258E+00
 -1.9658532E+00 -1.9631849E+00 -1.9605209E+00 -1.9578611E+00
 -1.9552055E+00 -1.9525540E+00 -1.9499068E+00 -1.9472637E+00
 -1.9446249E+00 -1.9419902E+00 -1.9393597E+00 -1.9367333E+00
 -1.9341110E+00 -1.9314929E+00 -1.9288790E+00 -1.9262692E+00
 -1.9236635E+00 -1.9210619E+00 -1.9184644E+00 -1.9158710E+00
 -1.9132817E+00 -1.9106965E+00 -1.9081153E+00 -1.9055382E+00
 -1.9029652E+00 -1.9003962E+00 -1.8978313E+00 -1.8952704E+00
 -1.8927136E+00 -1.8901607E+00 -1.8876119E+00 -1.8850671E+00
 -1.8825263E+00 -1.8799895E+00 -1.8774566E+00 -1.8749278E+00
 -1.8724030E+00 -1.8698820E+00 -1.8673651E+00 -1.8648521E+00
 -1.8623431E+00 -1.8598379E+00 -1.8573368E+00 -1.8548395E+00
 -1.8523462E+00 -1.8498567E+00 -1.8473712E+00 -1.8448895E+00
 -1.8424118E+00 -1.8399380E+00 -1.8374680E+00 -1.8350018E+00
 -1.8325396E+00 -1.8300812E+00 -1.8276266E+00 -1.8251759E+00
 -1.8227290E+00 -1.8202859E+00 -1.8178467E+00 -1.8154112E+00
 -1.8129796E+00 -1.8105518E+00 -1.8081278E+00 -1.8057075E+00
 -1.8032910E+00 -1.8008783E+00 -1.7984694E+00 -1.7960642E+00
 -1.7936628E+00 -1.7912651E+00 -1.7888712E+00 -1.7864810E+00
 -1.7840945E+00 -1.7817117E+00 -1.7793327E+00 -1.7769573E+00
 -1.7745857E+00 -1.7722178E+00 -1.7698535E+00 -1.7674929E+00
 -1.7651360E+00 -1.7627827E+00 -1.7604331E+00 -1.7580872E+00
 -1.7557449E+00 -1.7534063E+00 -1.7510712E+00 -1.7487398E+00
 -1.7464121E+00 -1.7440879E+00 -1.7417673E+00 -1.7394504E+00
 -1.7371370E+00 -1.7348273E+00 -1.7325211E+00 -1.7302184E+00
 -1.7279195E+00 -1.7256239E+00 -1.7233320E+00 -1.7210437E+00
 -1.7187588E+00 -1.7164775E+00 -1.7141998E+00 -1.7119256E+00
 -1.7096549E+00 -1.7073877E+00 -1.7051240E+00 -1.7028638E+00
 -1.7006071E+00 -1.6983539E+00 -1.6961042E+00 -1.6938579E+00
 -1.6916151E+00 -1.6893758E+00 -1.6871399E+00 -1.6849076E+00
 -1.6826786E+00 -1.6804531E+00 -1.6782310E+00 -1.6760123E+00
 -1.6737971E+00 -1.6715853E+00 -1.6693769E+00 -1.6671719E+00
 -1.6649702E+00 -1.6627720E+00 -1.6605772E+00 -1.6583858E+00
 -1.6561976E+00 -1.6540130E+00 -1.6518316E+00 -1.6496536E+00
 -1.6474789E+00 -1.6453076E+00 -1.6431396E+00 -1.6409750E+00
 -1.6388137E+00 -1.6366557E+00 -1.6345010E+00 -1.6323497E+00
 -1.6302016E+00 -1.6280568E+00 -1.6259153E+00 -1.6237772E+00
 -1.6216423E+00 -1.6195106E+00 -1.6173823E+00 -1.6152572E+00
 -1.6131353E+00 -1.6110167E+00 -1.6089014E+00 -1.6067892E+00
 -1.6046804E+00 -1.6025747E+00 -1.6004723E+00 -1.5983731E+00
 -1.5962771E+00 -1.5941843E+00 -1.5920947E+00 -1.5900083E+00
 -1.5879251E+00 -1.5858451E+00 -1.5837683E+00 -1.5816946E+00
 -1.5796241E+00 -1.5775567E+00 -1.5754925E+00 -1.5734315E+00
 -1.5713736E+00 -1.5693188E+00 -1.5672672E+00 -1.5652187E+00
 -1.5631733E+00 -1.5611311E+00 -1.5590920E+00 -1.5570560E+00
 -1.5550230E+00 -1.5529931E+00 -1.5509664E+00 -1.5489428E+00
 -1.5469222E+00 -1.5449047E+00 -1.5428903E+00 -1.5408788E+00
 -1.5388706E+00 -1.5368653E+00 -1.5348631E+00 -1.5328639E+00
 -1.5308678E+00 -1.5288747E+00 -1.5268846E+00 -1.5248975E+00
 -1.5229135E+00 -1.5209325E+00 -1.5189545E+00 -1.5169794E+00
 -1.5150074E+00 -1.5130384E+00 -1.5110723E+00 -1.5091093E+00
 -1.5071492E+00 -1.5051920E+00 -1.5032379E+00 -1.5012867E+00
 -1.4993384E+00 -1.4973932E+00 -1.4954508E+00 -1.4935114E+00
 -1.4915749E+00 -1.4896413E+00 -1.4877107E+00 -1.4857830E+00
 -1.4838582E+00 -1.4819363E+00 -1.4800173E+00 -1.4781013E+00
 -1.4761880E+00 -1.4742778E+00 -1.4723703E+00 -1.4704658E+00
 -1.4685641E+00 -1.4666653E+00 -1.4647694E+00 -1.4628763E+00
 -1.4609861E+00 -1.4590987E+00 -1.4572142E+00 -1.4553325E+00
 -1.4534536E+00 -1.4515776E+00 -1.4497044E+00 -1.4478340E+00
 -1.4459664E+00 -1.4441017E+00 -1.4422397E+00 -1.4403806E+00
 -1.4385242E+00 -1.4366706E+00 -1.4348198E+00 -1.4329718E+00
 -1.4311266E+00 -1.4292842E+00 -1.4274445E+00 -1.4256076E+00
 -1.4237734E+00 -1.4219420E+00 -1.4201133E+00 -1.4182874E+00
 -1.4164642E+00 -1.4146437E+00 -1.4128260E+00 -1.4110110E+00
 -1.4091987E+00 -1.4073892E+00 -1.4055823E+00 -1.4037782E+00
 -1.4019767E+00 -1.4001779E+00 -1.3983819E+00 -1.3965885E+00
 -1.3947979E+00 -1.3930098E+00 -1.3912245E+00 -1.3894418E+00
 -1.3876619E+00 -1.3858845E+00 -1.3841098E+00 -1.3823378E+00
 -1.3805684E+00 -1.3788016E+00 -1.3770375E+00 -1.3752760E+00
 -1.3735172E+00 -1.3717610E+00 -1.3700073E+00 -1.3682564E+00
 -1.3665080E+00 -1.3647622E+00 -1.3630190E+00 -1.3612784E+00
 -1.3595405E+00 -1.3578050E+00 -1.3560722E+00 -1.3543420E+00
 -1.3526143E+00 -1.3508892E+00 -1.3491667E+00 -1.3474467E+00
 -1.3457294E+00 -1.3440145E+00 -1.3423022E+00 -1.3405925E+00
 -1.3388852E+00 -1.3371806E+00 -1.3354784E+00 -1.3337788E+00
 -1.3320817E+00 -1.3303871E+00 -1.3286950E+00 -1.3270055E+00
 -1.3253184E+00 -1.3236338E+00 -1.3219518E+00 -1.3202723E+00
 -1.3185952E+00 -1.3169206E+00 -1.3152485E+00 -1.3135789E+00
 -1.3119117E+00 -1.3102470E+00 -1.3085848E+00 -1.3069250E+00
 -1.3052678E+00 -1.3036129E+00 -1.3019605E+00 -1.3003105E+00
 -1.2986630E+00 -1.2970179E+00 -1.2953753E+00 -1.2937350E+00
 -1.2920972E+00 -1.2904618E+00 -1.2888288E+00 -1.2871982E+00
 -1.2855701E+00 -1.2839443E+00 -1.2823210E+00 -1.2807000E+00
 -1.2790814E+00 -1.2774652E+00 -1.2758514E+00 -1.2742400E+00
 -1.2726309E+00 -1.2710243E+00 -1.2694199E+00 -1.2678179E+00
 -1.2662183E+00 -1.2646211E+00 -1.2630262E+00 -1.2614336E+00
 -1.2598434E+00 -1.2582556E+00 -1.2566700E+00 -1.2550868E+00
 -1.2535060E+00 -1.2519274E+00 -1.2503512E+00 -1.2487772E+00
 -1.2472056E+00 -1.2456363E+00 -1.2440693E+00 -1.2425046E+00
 -1.2409422E+00 -1.2393821E+00 -1.2378242E+00 -1.2362687E+00
 -1.2347155E+00 -1.2331645E+00 -1.2316157E+00 -1.2300693E+00
 -1.2285251E+00 -1.2269832E+00 -1.2254435E+00 -1.2239061E+00
 -1.2223709E+00 -1.2208381E+00 -1.2193074E+00 -1.2177790E+00
 -1.2162527E+00 -1.2147288E+00 -1.2132071E+00 -1.2116876E+00
 -1.2101702E+00 -1.2086552E+00 -1.2071423E+00 -1.2056316E+00
 -1.2041232E+00 -1.2026169E+00 -1.2011129E+00 -1.1996110E+00
 -1.1981114E+00 -1.1966138E+00 -1.1951186E+00 -1.1936255E+00
 -1.1921345E+00 -1.1906457E+00 -1.1891591E+00 -1.1876747E+00
 -1.1861924E+00 -1.1847123E+00 -1.1832343E+00 -1.1817585E+00
 -1.1802848E+00 -1.1788133E+00 -1.1773439E+00 -1.1758767E+00
 -1.1744116E+00 -1.1729486E+00 -1.1714877E+00 -1.1700290E+00
 -1.1685724E+00 -1.1671178E+00 -1.1656655E+00 -1.1642152E+00
 -1.1627670E+00 -1.1613209E+00 -1.1598770E+00 -1.1584351E+00
 -1.1569952E+00 -1.1555576E+00 -1.1541219E+00 -1.1526884E+00
 -1.1512569E+00 -1.1498276E+00 -1.1484002E+00 -1.1469749E+00
 -1.1455517E+00 -1.1441306E+00 -1.1427116E+00 -1.1412945E+00
 -1.1398796E+00 -1.1384666E+00 -1.1370557E+00 -1.1356469E+00
 -1.1342401E+00 -1.1328353E+00 -1.1314325E+00 -1.1300318E+00
 -1.1286332E+00 -1.1272364E+00 -1.1258418E+00 -1.1244491E+00
 -1.1230585E+00 -1.1216699E+00 -1.1202833E+00 -1.1188986E+00
 -1.1175160E+00 -1.1161353E+00 -1.1147567E+00 -1.1133800E+00
 -1.1120054E+00 -1.1106326E+00 -1.1092619E+00 -1.1078931E+00
 -1.1065264E+00 -1.1051615E+00 -1.1037987E+00 -1.1024378E+00
 -1.1010788E+00 -1.0997219E+00 -1.0983668E+00 -1.0970138E+00
 -1.0956626E+00 -1.0943134E+00 -1.0929662E+00 -1.0916208E+00
 -1.0902774E+00 -1.0889360E+00 -1.0875964E+00 -1.0862588E+00
 -1.0849231E+00 -1.0835893E+00 -1.0822574E+00 -1.0809275E+00
 -1.0795994E+00 -1.0782733E+00 -1.0769490E+00 -1.0756267E+00
 -1.0743062E+00 -1.0729877E+00 -1.0716710E+00 -1.0703561E+00
 -1.0690433E+00 -1.0677322E+00 -1.0664230E+00 -1.0651157E+00
 -1.0638103E+00 -1.0625068E+00 -1.0612051E+00 -1.0599053E+00
 -1.0586072E+00 -1.0573112E+00 -1.0560169E+00 -1.0547244E+00
 -1.0534339E+00 -1.0521452E+00 -1.0508582E+00 -1.0495732E+00
 -1.0482899E+00 -1.0470086E+00 -1.0457290E+00 -1.0444512E+00
 -1.0431753E+00 -1.0419012E+00 -1.0406289E+00 -1.0393584E+00
 -1.0380898E+00 -1.0368229E+00 -1.0355579E+00 -1.0342946E+00
 -1.0330331E+00 -1.0317734E+00 -1.0305155E+00 -1.0292595E+00
 -1.0280051E+00 -1.0267526E+00 -1.0255019E+00 -1.0242530E+00
 -1.0230058E+00 -1.0217603E+00 -1.0205167E+00 -1.0192748E+00
 -1.0180347E+00 -1.0167963E+00 -1.0155597E+00 -1.0143249E+00
 -1.0130918E+00 -1.0118604E+00 -1.0106309E+00 -1.0094030E+00
 -1.0081769E+00 -1.0069525E+00 -1.0057298E+00 -1.0045089E+00
 -1.0032897E+00 -1.0020722E+00 -1.0008566E+00 -9.9964253E-01
 -9.9843023E-01 -9.9721965E-01 -9.9601073E-01 -9.9480360E-01
 -9.9359813E-01 -9.9239438E-01 -9.9119235E-01 -9.8999198E-01
 -9.8879333E-01 -9.8759633E-01 -9.8640105E-01 -9.8520750E-01
 -9.8401560E-01 -9.8282535E-01 -9.8163683E-01 -9.8044995E-01
 -9.7926473E-01 -9.7808123E-01 -9.7689938E-01 -9.7571918E-01
 -9.7454070E-01 -9.7336380E-01 -9.7218863E-01 -9.7101503E-01
 -9.6984315E-01 -9.6867293E-01 -9.6750428E-01 -9.6633735E-01
 -9.6517200E-01 -9.6400838E-01 -9.6284633E-01 -9.6168593E-01
 -9.6052718E-01 -9.5937000E-01 -9.5821448E-01 -9.5706060E-01
 -9.5590830E-01 -9.5475765E-01 -9.5360858E-01 -9.5246115E-01
 -9.5131538E-01 -9.5017118E-01 -9.4902855E-01 -9.4788758E-01
 -9.4674818E-01 -9.4561035E-01 -9.4447410E-01 -9.4333950E-01
 -9.4220648E-01 -9.4107503E-01 -9.3994523E-01 -9.3881693E-01
 -9.3769020E-01 -9.3656513E-01 -9.3544155E-01 -9.3431963E-01
  3.2922791E+04  6.5542472E+04  9.7861140E+04  1.2988088E+05
  1.6160374E+05  1.9303179E+05  2.2416707E+05  2.5501161E+05
  2.8556743E+05  3.1583652E+05  3.4582089E+05  3.7552250E+05
  4.0494335E+05  4.3408536E+05  4.6295050E+05  4.9154069E+05
  5.1985784E+05  5.4790388E+05  5.7568068E+05  6.0319015E+05
  6.3043415E+05  6.5741454E+05  6.8413318E+05  7.1059189E+05
  7.3679252E+05  7.6273688E+05  7.8842670E+05  8.1386393E+05
  8.3905020E+05  8.6398740E+05  8.8867718E+05  9.1312140E+05
  9.3732165E+05  9.6127980E+05  9.8499750E+05  1.0084765E+06
  1.0317185E+06  1.0547251E+06  1.0774980E+06  1.1000389E+06
  1.1223494E+06  1.1444313E+06  1.1662860E+06  1.1879153E+06
  1.2093208E+06  1.2305040E+06  1.2514665E+06  1.2722100E+06
  1.2927360E+06  1.3130460E+06  1.3331417E+06  1.3530245E+06
  1.3726961E+06  1.3921578E+06  1.4114113E+06  1.4304580E+06
  1.4492995E+06  1.4679371E+06  1.4863725E+06  1.5046071E+06
  1.5226422E+06  1.5404795E+06  1.5581202E+06  1.5755660E+06
  1.5928180E+06  1.6098779E+06  1.6267469E+06  1.6434265E+06
  1.6599181E+06  1.6762230E+06  1.6923426E+06  1.7082783E+06
  1.7240315E+06  1.7396033E+06  1.7549954E+06  1.7702087E+06
  1.7852449E+06  1.8001052E+06  1.8147908E+06  1.8293030E+06
  1.8436431E+06  1.8578125E+06  1.8718124E+06  1.8856440E+06
  1.8993086E+06  1.9128074E+06  1.9261417E+06  1.9393127E+06
  1.9523216E+06  1.9651697E+06  1.9778581E+06  1.9903880E+06
  2.0027607E+06  2.0149773E+06  2.0270390E+06  2.0389469E+06
  2.0507023E+06  2.0623062E+06  2.0737598E+06  2.0850643E+06
  2.0962208E+06  2.1072303E+06  2.1180941E+06  2.1288132E+06
  2.1393887E+06  2.1498218E+06  2.1601134E+06  2.1702648E+06
  2.1802769E+06  2.1901509E+06  2.1998878E+06  2.2094885E+06
  2.2189544E+06  2.2282862E+06  2.2374851E+06  2.2465520E+06
  2.2554881E+06  2.2642943E+06  2.2729717E+06  2.2815212E+06
  2.2899437E+06  2.2982405E+06  2.3064122E+06  2.3144601E+06
  2.3223850E+06  2.3301879E+06  2.3378697E+06  2.3454314E+06
  2.3528740E+06  2.3601983E+06  2.3674055E+06  2.3744961E+06
  2.3814713E+06  2.3883321E+06  2.3950792E+06  2.4017135E+06
  2.4082361E+06  2.4146476E+06  2.4209492E+06  2.4271415E+06
  2.4332255E+06  2.4392021E+06  2.4450721E+06  2.4508363E+06
  2.4564957E+06  2.4620510E+06  2.4675032E+06  2.4728529E+06
  2.4781012E+06  2.4832487E+06  2.4882963E+06  2.4932448E+06
  2.4980951E+06  2.5028477E+06  2.5075038E+06  2.5120640E+06
  2.5165290E+06  2.5208997E+06  2.5251768E+06  2.5293611E+06
  2.5334534E+06  2.5374544E+06  2.5413649E+06  2.5451856E+06
  2.5489173E+06  2.5525607E+06  2.5561166E+06  2.5595856E+06
  2.5629685E+06  2.5662660E+06  2.5694789E+06  2.5726078E+06
  2.5756535E+06  2.5786166E+06  2.5814978E+06  2.5842978E+06
  2.5870174E+06  2.5896572E+06  2.5922179E+06  2.5947001E+06
  2.5971045E+06  2.5994318E+06  2.6016827E+06  2.6038577E+06
  2.6059575E+06  2.6079829E+06  2.6099344E+06  2.6118127E+06
  2.6136184E+06  2.6153521E+06  2.6170144E+06  2.6186060E+06
  2.6201276E+06  2.6215796E+06  2.6229627E+06  2.6242775E+06
  2.6255247E+06  2.6267048E+06  2.6278184E+06  2.6288660E+06
  2.6298483E+06  2.6307659E+06  2.6316193E+06  2.6324091E+06
  2.6331359E+06  2.6338001E+06  2.6344025E+06  2.6349435E+06
  2.6354237E+06  2.6358437E+06  2.6362040E+06  2.6365050E+06
  2.6367474E+06  2.6369318E+06  2.6370585E+06  2.6371283E+06
  2.6371415E+06  2.6370986E+06  2.6370003E+06  2.6368471E+06
  2.6366393E+06  2.6363776E+06  2.6360624E+06  2.6356943E+06
  2.6352737E+06  2.6348011E+06  2.6342771E+06  2.6337020E+06
  2.6330763E+06  2.6324007E+06  2.6316755E+06  2.6309011E+06
  2.6300781E+06  2.6292070E+06  2.6282881E+06  2.6273220E+06
  2.6263091E+06  2.6252498E+06  2.6241446E+06  2.6229941E+06
  2.6217984E+06  2.6205582E+06  2.6192738E+06  2.6179458E+06
  2.6165744E+06  2.6151602E+06  2.6137037E+06  2.6122050E+06
  2.6106648E+06  2.6090834E+06  2.6074613E+06  2.6057988E+06
  2.6040964E+06  2.6023544E+06  2.6005733E+06  2.5987534E+06
  2.5968951E+06  2.5949990E+06  2.5930652E+06  2.5910942E+06
  2.5890865E+06  2.5870423E+06  2.5849621E+06  2.5828462E+06
  2.5806950E+06  2.5785089E+06  2.5762883E+06  2.5740334E+06
  2.5717447E+06  2.5694225E+06  2.5670672E+06  2.5646792E+06
  2.5622587E+06  2.5598062E+06  2.5573220E+06  2.5548063E+06
  2.5522597E+06  2.5496824E+06  2.5470746E+06  2.5444370E+06
  2.5417696E+06  2.5390728E+06  2.5363470E+06  2.5335925E+06
  2.5308096E+06  2.5279986E+06  2.5251599E+06  2.5222938E+06
  2.5194005E+06  2.5164805E+06  2.5135339E+06  2.5105611E+06
  2.5075625E+06  2.5045382E+06  2.5014886E+06  2.4984140E+06
  2.4953148E+06  2.4921911E+06  2.4890434E+06  2.4858717E+06
  2.4826766E+06  2.4794582E+06  2.4762168E+06  2.4729527E+06
  2.4696662E+06  2.4663575E+06  2.4630270E+06  2.4596749E+06
  2.4563014E+06  2.4529069E+06  2.4494915E+06  2.4460557E+06
  2.4425996E+06  2.4391234E+06  2.4356275E+06  2.4321121E+06
  2.4285774E+06  2.4250238E+06  2.4214514E+06  2.4178605E+06
  2.4142514E+06  2.4106242E+06  2.4069793E+06  2.4033169E+06
  2.3996372E+06  2.3959403E+06  2.3922268E+06  2.3884966E+06
  2.3847501E+06  2.3809874E+06  2.3772089E+06  2.3734147E+06
  2.3696051E+06  2.3657802E+06  2.3619404E+06  2.3580857E+06
  2.3542165E+06  2.3503329E+06  2.3464352E+06  2.3425236E+06
  2.3385983E+06  2.3346595E+06  2.3307074E+06  2.3267422E+06
  2.3227641E+06  2.3187734E+06  2.3147702E+06  2.3107547E+06
  2.3067270E+06  2.3026875E+06  2.2986364E+06  2.2945737E+06
  2.2904997E+06  2.2864146E+06  2.2823186E+06  2.2782119E+06
  2.2740945E+06  2.2699668E+06  2.2658290E+06  2.2616811E+06
  2.2575234E+06  2.2533560E+06  2.2491792E+06  2.2449931E+06
  2.2407979E+06  2.2365937E+06  2.2323807E+06  2.2281591E+06
  2.2239291E+06  2.2196909E+06  2.2154444E+06  2.2111901E+06
  2.2069280E+06  2.2026583E+06  2.1983811E+06  2.1940967E+06
  2.1898050E+06  2.1855065E+06  2.1812010E+06  2.1768889E+06
  2.1725703E+06  2.1682453E+06  2.1639141E+06  2.1595768E+06
  2.1552336E+06  2.1508846E+06  2.1465300E+06  2.1421699E+06
  2.1378044E+06  2.1334338E+06  2.1290581E+06  2.1246775E+06
  2.1202921E+06  2.1159020E+06  2.1115074E+06  2.1071085E+06
  2.1027053E+06  2.0982980E+06  2.0938867E+06  2.0894715E+06
  2.0850527E+06  2.0806302E+06  2.0762043E+06  2.0717750E+06
  2.0673425E+06  2.0629070E+06  2.0584685E+06  2.0540270E+06
  2.0495829E+06  2.0451362E+06  2.0406869E+06  2.0362353E+06
  2.0317814E+06  2.0273255E+06  2.0228674E+06  2.0184074E+06
  2.0139457E+06  2.0094822E+06  2.0050172E+06  2.0005507E+06
  1.9960828E+06  1.9916137E+06  1.9871434E+06  1.9826720E+06
  1.9781998E+06  1.9737267E+06  1.9692528E+06  1.9647783E+06
  1.9603033E+06  1.9558279E+06  1.9513520E+06  1.9468760E+06
  1.9423999E+06  1.9379237E+06  1.9334475E+06  1.9289714E+06
  1.9244957E+06  1.9200202E+06  1.9155452E+06  1.9110707E+06
  1.9065968E+06  1.9021235E+06  1.8976511E+06  1.8931796E+06
  1.8887090E+06  1.8842393E+06  1.8797709E+06  1.8753037E+06
  1.8708377E+06  1.8663732E+06  1.8619101E+06  1.8574485E+06
  1.8529886E+06  1.8485303E+06  1.8440739E+06  1.8396193E+06
  1.8351666E+06  1.8307160E+06  1.8262674E+06  1.8218210E+06
  1.8173768E+06  1.8129350E+06  1.8084955E+06  1.8040585E+06
  1.7996240E+06  1.7951921E+06  1.7907629E+06  1.7863364E+06
  1.7819127E+06  1.7774919E+06  1.7730740E+06  1.7686592E+06
  1.7642474E+06  1.7598388E+06  1.7554333E+06  1.7510312E+06
  1.7466323E+06  1.7422368E+06  1.7378448E+06  1.7334563E+06
  1.7290715E+06  1.7246902E+06  1.7203127E+06  1.7159388E+06
  1.7115688E+06  1.7072027E+06  1.7028405E+06  1.6984823E+06
  1.6941281E+06  1.6897780E+06  1.6854321E+06  1.6810904E+06
  1.6767529E+06  1.6724198E+06  1.6680909E+06  1.6637666E+06
  1.6594466E+06  1.6551313E+06  1.6508204E+06  1.6465142E+06
  1.6422126E+06  1.6379158E+06  1.6336238E+06  1.6293365E+06
  1.6250540E+06  1.6207765E+06  1.6165040E+06  1.6122364E+06
  1.6079738E+06  1.6037163E+06  1.5994640E+06  1.5952168E+06
  1.5909749E+06  1.5867381E+06  1.5825067E+06  1.5782806E+06
  1.5740599E+06  1.5698446E+06  1.5656348E+06  1.5614303E+06
  1.5572315E+06  1.5530383E+06  1.5488507E+06  1.5446687E+06
  1.5404923E+06  1.5363217E+06  1.5321569E+06  1.5279977E+06
  1.5238445E+06  1.5196971E+06  1.5155557E+06  1.5114201E+06
  1.5072905E+06  1.5031669E+06  1.4990493E+06  1.4949377E+06
  1.4908323E+06  1.4867330E+06  1.4826398E+06  1.4785528E+06
  1.4744720E+06  1.4703974E+06  1.4663292E+06  1.4622672E+06
  1.4582115E+06  1.4541623E+06  1.4501193E+06  1.4460828E+06
  1.4420527E+06  1.4380291E+06  1.4340119E+06  1.4300013E+06
  1.4259972E+06  1.4219997E+06  1.4180087E+06  1.4140244E+06
  1.4100467E+06  1.4060757E+06  1.4021114E+06  1.3981537E+06
  1.3942028E+06  1.3902586E+06  1.3863212E+06  1.3823905E+06
  1.3784667E+06  1.3745497E+06  1.3706396E+06  1.3667363E+06
  1.3628399E+06  1.3589505E+06  1.3550680E+06  1.3511924E+06
  1.3473238E+06  1.3434621E+06  1.3396075E+06  1.3357599E+06
  1.3319193E+06  1.3280858E+06  1.3242594E+06  1.3204400E+06
  1.3166278E+06  1.3128226E+06  1.3090246E+06  1.3052337E+06
  1.3014500E+06  1.2976735E+06  1.2939042E+06  1.2901421E+06
  1.2863871E+06  1.2826394E+06  1.2788990E+06  1.2751658E+06
  1.2714399E+06  1.2677213E+06  1.2640100E+06  1.2603059E+06
  1.2566093E+06  1.2529199E+06  1.2492378E+06  1.2455631E+06
  1.2418958E+06  1.2382358E+06  1.2345832E+06  1.2309380E+06
  1.2273002E+06  1.2236698E+06  1.2200468E+06  1.2164313E+06
  1.2128232E+06  1.2092225E+06  1.2056293E+06  1.2020435E+06
  1.1984652E+06  1.1948944E+06  1.1913310E+06  1.1877752E+06
  1.1842268E+06  1.1806859E+06  1.1771525E+06  1.1736267E+06
  1.1701083E+06  1.1665975E+06  1.1630942E+06  1.1595985E+06
  1.1561102E+06  1.1526296E+06  1.1491565E+06  1.1456909E+06
  1.1422328E+06  1.1387824E+06  1.1353394E+06  1.1319041E+06
  1.1284763E+06  1.1250562E+06  1.1216435E+06  1.1182385E+06
  1.1148410E+06  1.1114512E+06  1.1080688E+06  1.1046941E+06
  1.1013271E+06  1.0979675E+06  1.0946156E+06  1.0912712E+06
  1.0879345E+06  1.0846054E+06  1.0812838E+06  1.0779698E+06
  1.0746635E+06  1.0713647E+06  1.0680736E+06  1.0647900E+06
  1.0615140E+06  1.0582457E+06  1.0549849E+06  1.0517317E+06
  1.0484861E+06  1.0452482E+06  1.0420178E+06  1.0387949E+06
  1.0355797E+06  1.0323721E+06  1.0291721E+06  1.0259796E+06
  1.0227947E+06  1.0196174E+06  1.0164477E+06  1.0132856E+06
  1.0101311E+06  1.0069841E+06  1.0038446E+06  1.0007128E+06
  9.9758850E+05  9.9447173E+05  9.9136253E+05  9.8826090E+05
  9.8516685E+05  9.8208030E+05  9.7900133E+05  9.7592985E+05
  9.7286588E+05  9.6980948E+05  9.6676065E+05  9.6371925E+05
  9.6068543E+05  9.5765910E+05  9.5464028E+05  9.5162895E+05
  9.4862513E+05  9.4562880E+05  9.4263990E+05  9.3965850E+05
  9.3668460E+05  9.3371820E+05  9.3075923E+05  9.2780768E+05
  9.2486363E+05  9.2192700E+05  9.1899780E+05  9.1607603E+05
  9.1316168E+05  9.1025483E+05  9.0735533E+05  9.0446318E+05
  9.0157853E+05  8.9870123E+05  8.9583128E+05  8.9296875E+05
  8.9011358E+05  8.8726575E+05  8.8442535E+05  8.8159223E+05
  8.7876645E+05  8.7594810E+05  8.7313695E+05  8.7033323E+05
  8.6753670E+05  8.6474760E+05  8.6196570E+05  8.5919115E+05
  8.5642380E+05  8.5366380E+05  8.5091100E+05  8.4816555E+05
  8.4542723E+05  8.4269625E+05  8.3997240E+05  8.3725583E+05
  8.3454645E+05  8.3184428E+05  8.2914930E+05  8.2646153E+05
  8.2378095E+05  8.2110750E+05  8.1844118E+05  8.1578205E+05
  8.1313005E+05  8.1048518E+05  8.0784743E+05  8.0521680E+05
  8.0259323E+05  7.9997678E+05  7.9736738E+05  7.9476510E+05
  7.9216988E+05  7.8958170E+05  7.8700050E+05  7.8442643E+05
  7.8185933E+05  7.7929928E+05  7.7674613E+05  7.7420010E+05
  7.7166098E+05  7.6912883E+05  7.6660365E+05  7.6408545E+05
  7.6157415E+05  7.5906983E+05  7.5657240E+05  7.5408188E+05
  7.5159818E+05  7.4912147E+05  7.4665160E+05  7.4418860E+05
  7.4173244E+05  7.3928314E+05  7.3684066E+05  7.3440501E+05
  7.3197617E+05  7.2955412E+05  7.2713887E+05  7.2473039E+05
  7.2232868E+05  7.1993372E+05  7.1754550E+05  7.1516401E+05
  7.1278925E+05  7.1042119E+05  7.0805984E+05  7.0570516E+05
  7.0335716E+05  7.0101583E+05  6.9868115E+05  6.9635310E+05
  6.9403169E+05  6.9171689E+05  6.8940869E+05  6.8710709E+05
  6.8481207E+05  6.8252362E+05  6.8024172E+05  6.7796637E+05
  6.7569756E+05  6.7343526E+05  6.7117948E+05  6.6893019E+05
  6.6668739E+05  6.6445107E+05  6.6222120E+05  6.5999779E+05
  6.5778081E+05  6.5557025E+05  6.5336612E+05  6.5116838E+05
  6.4897703E+05  6.4679205E+05  6.4461344E+05  6.4244118E+05
  6.4027526E+05  6.3811568E+05  6.3596240E+05  6.3381542E+05
  6.3167474E+05  6.2954033E+05  6.2741219E+05  6.2529030E+05
  6.2317465E+05  6.2106523E+05  6.1896203E+05  6.1686503E+05
  6.1477421E+05  6.1268957E+05  6.1061111E+05  6.0853879E+05
  6.0647261E+05  6.0441256E+05  6.0235862E+05  6.0031079E+05
  5.9826905E+05  5.9623338E+05  5.9420378E+05  5.9218022E+05
  5.9016271E+05  5.8815122E+05  5.8614575E+05  5.8414628E+05
  5.8215279E+05  5.8016528E+05  5.7818373E+05  5.7620813E+05
  5.7423847E+05  5.7227473E+05  5.7031690E+05  5.6836497E+05
  5.6641892E+05  5.6447875E+05  5.6254444E+05  5.6061597E+05
  5.5869334E+05  5.5677653E+05  5.5486553E+05  5.5296032E+05
  5.5106090E+05  5.4916724E+05  5.4727935E+05  5.4539720E+05
  5.4352077E+05  5.4165007E+05  5.3978507E+05  5.3792576E+05
  5.3607214E+05  5.3422418E+05  5.3238188E+05  5.3054521E+05
  5.2871417E+05  5.2688876E+05  5.2506893E+05  5.2325471E+05
  5.2144605E+05  5.1964296E+05  5.1784542E+05  5.1605342E+05
  5.1426695E+05  5.1248598E+05  5.1071051E+05  5.0894054E+05
  5.0717603E+05  5.0541698E+05  5.0366339E+05  5.0191523E+05
  5.0017248E+05  4.9843515E+05  4.9670321E+05  4.9497666E+05
  4.9325548E+05  4.9153965E+05  4.8982917E+05  4.8812402E+05
  4.8642419E+05  4.8472967E+05  4.8304044E+05  4.8135649E+05
  4.7967781E+05  4.7800438E+05  4.7633620E+05  4.7467324E+05
  4.7301550E+05  4.7136296E+05  4.6971562E+05  4.6807345E+05
  4.6643645E+05  4.6480460E+05  4.6317789E+05  4.6155631E+05
  4.5993984E+05  4.5832847E+05  4.5672219E+05  4.5512099E+05
  4.5352485E+05  4.5193376E+05  4.5034772E+05  4.4876669E+05
  4.4719068E+05  4.4561967E+05  4.4405365E+05  4.4249260E+05
  4.4093651E+05  4.3938538E+05  4.3783918E+05  4.3629791E+05
  4.3476154E+05  4.3323008E+05  4.3170350E+05  4.3018180E+05
  4.2866496E+05  4.2715297E+05  4.2564581E+05  4.2414348E+05
  4.2264596E+05  4.2115325E+05  4.1966531E+05  4.1818215E+05
  4.1670376E+05  4.1523011E+05  4.1376120E+05  4.1229701E+05
  4.1083754E+05  4.0938277E+05  4.0793268E+05  4.0648727E+05
  4.0504653E+05  4.0361043E+05  4.0217897E+05  4.0075214E+05
  3.9932993E+05  3.9791231E+05  3.9649928E+05  3.9509084E+05
  3.9368696E+05  3.9228762E+05  3.9089283E+05  3.8950257E+05
  3.8811683E+05  3.8673559E+05  3.8535884E+05  3.8398657E+05
  3.8261877E+05  3.8125542E+05  3.7989653E+05  3.7854206E+05
  3.7719200E+05  3.7584637E+05  3.7450512E+05  3.7316826E+05
  3.7183577E+05  3.7050764E+05  3.6918386E+05  3.6786442E+05
  3.6654929E+05  3.6523849E+05  3.6393198E+05  3.6262976E+05
  3.6133182E+05  3.6003815E+05  3.5874872E+05  3.5746355E+05
  3.5618260E+05  3.5490587E+05  3.5363334E+05  3.5236502E+05
  3.5110087E+05  3.4984089E+05  3.4858508E+05  3.4733341E+05
  3.4608588E+05  3.4484248E+05  3.4352980E+05  3.4229702E+05
  3.4106986E+05  3.3984832E+05  3.3863237E+05  3.3742199E+05
  3.3621717E+05  3.3501790E+05  3.3382415E+05  3.3263591E+05
  3.3145316E+05  3.3027587E+05  3.2910404E+05  3.2793765E+05
  3.2677667E+05  3.2562110E+05  3.2447091E+05  3.2332609E+05
  3.2218661E+05  3.2105246E+05  3.1992362E+05  3.1880007E+05
  3.1768180E+05  3.1656878E+05  3.1546100E+05  3.1435844E+05
  3.1326107E+05  3.1216890E+05  3.1108188E+05  3.1000001E+05
  3.0892327E+05  3.0785163E+05  3.0678509E+05  3.0572360E+05
  3.0466718E+05  3.0361578E+05  3.0256940E+05  3.0152801E+05
  3.0049160E+05  2.9946014E+05  2.9843362E+05  2.9741202E+05
  2.9639531E+05  2.9538349E+05  2.9437652E+05  2.9337440E+05
  2.9237709E+05  2.9138459E+05  2.9039687E+05  2.8941392E+05
  2.8843570E+05  2.8746221E+05  2.8649342E+05  2.8552931E+05
  2.8456987E+05  2.8361507E+05  2.8266491E+05  2.8171934E+05
  2.8077836E+05  2.7984194E+05  2.7891007E+05  2.7798272E+05
  2.7705988E+05  2.7614153E+05  2.7522763E+05  2.7431819E+05
  2.7341316E+05  2.7251255E+05  2.7161631E+05  2.7072444E+05
  2.6983691E+05  2.6895371E+05  2.6807481E+05  2.6720020E+05
  2.6632985E+05  2.6546373E+05  2.6460185E+05  2.6374415E+05
  2.6289065E+05  2.6204130E+05  2.6119609E+05  2.6035500E+05
  2.5951801E+05  2.5868510E+05  2.5785624E+05  2.5703143E+05
  2.5621063E+05  2.5539382E+05  2.5458099E+05  2.5377211E+05
  2.5296716E+05  2.5216613E+05  2.5136900E+05  2.5057573E+05
  2.4978631E+05  2.4900072E+05  2.4821894E+05  2.4744095E+05
  2.4666673E+05  2.4589625E+05  2.4512950E+05  2.4436645E+05
  2.4360708E+05  2.4285138E+05  2.4209932E+05  2.4135088E+05
  2.4060605E+05  2.3986478E+05  2.3912708E+05  2.3839292E+05
  2.3766227E+05  2.3693511E+05  2.3621144E+05  2.3549121E+05
  2.3477441E+05  2.3406104E+05  2.3335104E+05  2.3264442E+05
  2.3194115E+05  2.3124120E+05  2.3054456E+05  2.2985121E+05
  2.2916112E+05  2.2847427E+05  2.2779065E+05  2.2711022E+05
  2.2643299E+05  2.2575890E+05  2.2508796E+05  2.2442014E+05
  2.2375541E+05  2.2309376E+05  2.2243516E+05  2.2177959E+05
  2.2112704E+05  2.2047748E+05  2.1983090E+05  2.1918725E+05
  2.1854655E+05  2.1790875E+05  2.1727384E+05  2.1664179E+05
  2.1601259E+05  2.1538622E+05  2.1476264E+05  2.1414185E+05
  2.1352383E+05  2.1290855E+05  2.1229598E+05  2.1168612E+05
  2.1107894E+05  2.1047441E+05  2.0987253E+05  2.0927326E+05
  2.0867659E+05  2.0808249E+05  2.0749095E+05  2.0690195E+05
  2.0631545E+05  2.0573145E+05  2.0514993E+05  2.0457086E+05
  2.0399421E+05  2.0341998E+05  2.0284814E+05  2.0227868E+05
  2.0171156E+05  2.0114677E+05  2.0058429E+05  2.0002410E+05
  1.9946618E+05  1.9891051E+05  1.9835707E+05  1.9780583E+05
  1.9725678E+05  1.9670990E+05  1.9616517E+05  1.9562257E+05
  1.9508207E+05  1.9454366E+05  1.9400732E+05  1.9347302E+05
  1.9294076E+05  1.9241049E+05  1.9188222E+05  1.9135592E+05
  1.9083156E+05  1.9030913E+05  1.8978862E+05  1.8926999E+05
  1.8875323E+05  1.8823832E+05  1.8772523E+05  1.8721397E+05
  1.8670448E+05  1.8619678E+05  1.8569082E+05  1.8518660E+05
  1.8468410E+05  1.8418328E+05  1.8368414E+05  1.8318666E+05
  1.8269082E+05  1.8219659E+05  1.8170396E+05  1.8121292E+05
  1.8072343E+05  1.8023548E+05  1.7974906E+05  1.7926414E+05
  1.7878071E+05  1.7829875E+05  1.7781823E+05  1.7733914E+05
  1.7686146E+05  1.7638518E+05  1.7591027E+05  1.7543672E+05
  1.7496450E+05  1.7449361E+05  1.7402401E+05  1.7355569E+05
  1.7308865E+05  1.7262284E+05  1.7215827E+05  1.7169491E+05
  1.7123274E+05  1.7077175E+05  1.7031191E+05  1.6985321E+05
  1.6939564E+05  1.6893917E+05  1.6848379E+05  1.6802947E+05
  1.6757621E+05  1.6712398E+05  1.6667277E+05  1.6622256E+05
  1.6577333E+05  1.6532508E+05  1.6487777E+05  1.6443139E+05
  1.6398593E+05  1.6354136E+05  1.6309768E+05  1.6265486E+05
  1.6221290E+05  1.6177175E+05  1.6133144E+05  1.6089191E+05
  1.6045318E+05  1.6001521E+05  1.5957799E+05  1.5914150E+05
  1.5870573E+05  1.5827067E+05  1.5783629E+05  1.5740258E+05
  1.5696953E+05  1.5653712E+05  1.5610534E+05  1.5567416E+05
  1.5524357E+05  1.5481357E+05  1.5438413E+05  1.5395522E+05
  1.5352686E+05  1.5309902E+05  1.5267167E+05  1.5224482E+05
  1.5181844E+05  1.5139252E+05  1.5096704E+05  1.5054199E+05
  1.5011735E+05  1.4969312E+05  1.4926928E+05  1.4884580E+05
  1.4842269E+05  1.4799992E+05  1.4757748E+05  1.4715536E+05
  1.4673354E+05  1.4631201E+05  1.4589076E+05  1.4546977E+05
  1.4504903E+05  1.4462852E+05  1.4420824E+05  1.4378817E+05
  1.4336830E+05  1.4294861E+05  1.4252909E+05  1.4210973E+05
  1.4169052E+05  1.4127144E+05  1.4085248E+05  1.4043363E+05
  1.4001488E+05  1.3959622E+05  1.3917763E+05  1.3875909E+05
  1.3834061E+05  1.3792217E+05  1.3750375E+05  1.3708535E+05
  1.3666695E+05  1.3624854E+05  1.3583012E+05  1.3541166E+05
  1.3499317E+05  1.3457462E+05  1.3415601E+05  1.3373732E+05
  1.3331856E+05  1.3289970E+05  1.3248074E+05  1.3206166E+05
  1.3164245E+05  1.3122311E+05  1.3080364E+05  1.3038400E+05
  1.2996420E+05  1.2954423E+05  1.2912408E+05  1.2870374E+05
  1.2828319E+05  1.2786243E+05  1.2744146E+05  1.2702026E+05
  1.2659882E+05  1.2617714E+05  1.2575520E+05  1.2533300E+05
  1.2491054E+05  1.2448779E+05  1.2406476E+05  1.2364144E+05
  1.2321782E+05  1.2279388E+05  1.2236963E+05  1.2194506E+05
  1.2152015E+05  1.2109491E+05  1.2066932E+05  1.2024338E+05
  1.1981708E+05  1.1939042E+05  1.1896338E+05  1.1853597E+05
  1.1810817E+05  1.1767998E+05  1.1725139E+05  1.1682241E+05
  1.1639301E+05  1.1596320E+05  1.1553298E+05  1.1510233E+05
  1.1467124E+05  1.1423973E+05  1.1380778E+05  1.1337537E+05
  1.1294252E+05  1.1250923E+05  1.1207546E+05  1.1164124E+05
  1.1120656E+05  1.1077140E+05  1.1033577E+05  1.0989967E+05
  1.0946308E+05  1.0902600E+05  1.0858844E+05  1.0815039E+05
  1.0771185E+05  1.0727281E+05  1.0683327E+05  1.0639322E+05
  1.0595268E+05  1.0551163E+05  1.0507007E+05  1.0462800E+05
  1.0418541E+05  1.0374232E+05  1.0329871E+05  1.0285457E+05
  1.0240993E+05  1.0196477E+05  1.0151908E+05  1.0107287E+05
  1.0062614E+05  1.0017890E+05  9.9731123E+04  9.9282825E+04
  9.8834010E+04  9.8384670E+04  9.7934813E+04  9.7484430E+04
  9.7033530E+04  9.6582105E+04  9.6130163E+04  9.5677703E+04
  9.5224725E+04  9.4771238E+04  9.4317225E+04  9.3862710E+04
  9.3407685E+04  9.2952143E+04  9.2496105E+04  9.2039558E+04
  9.1582508E+04  9.1124963E+04  9.0666923E+04  9.0208388E+04
  8.9749365E+04  8.9289855E+04  8.8829865E+04  8.8369395E+04
  8.7908445E+04  8.7447030E+04  8.6985143E+04  8.6522798E+04
  8.6059995E+04  8.5596735E+04  8.5133025E+04  8.4668880E+04
  8.4204285E+04  8.3739270E+04  8.3273820E+04  8.2807943E+04
  8.2341660E+04  8.1874965E+04  8.1407865E+04  8.0940368E+04
  8.0472480E+04  8.0004203E+04  7.9535558E+04  7.9066538E+04
  7.8597158E+04  7.8127418E+04  7.7657340E+04  7.7186910E+04
  7.6716158E+04  7.6245083E+04  7.5773685E+04  7.5301988E+04
  7.4829991E+04  7.4357705E+04  7.3885139E+04  7.3412303E+04
  7.2939205E+04  7.2465857E+04  7.1992267E+04  7.1518445E+04
  7.1044403E+04  7.0570149E+04  7.0095695E+04  6.9621052E+04
  6.9146231E+04  6.8671241E+04  6.8196096E+04  6.7720807E+04
  6.7245384E+04  6.6769841E+04  6.6294189E+04  6.5818441E+04
  6.5342609E+04  6.4866706E+04  6.4390744E+04  6.3914737E+04
  6.3438698E+04  6.2962641E+04  6.2486579E+04  6.2010526E+04
  6.1534496E+04  6.1058503E+04  6.0582563E+04  6.0106688E+04
  5.9630896E+04  5.9155199E+04  5.8679615E+04  5.8204157E+04
  5.7728843E+04  5.7253687E+04  5.6778707E+04  5.6303917E+04
  5.5829335E+04  5.5354977E+04  5.4880860E+04  5.4407002E+04
  5.3933420E+04  5.3460130E+04  5.2987151E+04  5.2514502E+04
  5.2042199E+04  5.1570262E+04  5.1098709E+04  5.0627558E+04
  5.0156829E+04  4.9686542E+04  4.9216714E+04  4.8747366E+04
  4.8278518E+04  4.7810190E+04  4.7342402E+04  4.6875175E+04
  4.6408529E+04  4.5942485E+04  4.5477065E+04  4.5012290E+04
  4.4548181E+04  4.4084759E+04  4.3622048E+04  4.3160070E+04
  4.2698847E+04  4.2238401E+04  4.1778755E+04  4.1319933E+04
  4.0861958E+04  4.0404854E+04  3.9948643E+04  3.9493351E+04
  3.9039002E+04  3.8585618E+04  3.8133228E+04  3.7681853E+04
  3.7231521E+04  3.6782255E+04  3.6334083E+04  3.5887029E+04
  3.5441120E+04  3.4996381E+04  3.4552840E+04  3.4110523E+04
  3.3669458E+04  3.3229670E+04  3.2791189E+04  3.2354041E+04
  3.1918255E+04  3.1483858E+04  3.1050879E+04  3.0619347E+04
  3.0189291E+04  2.9760739E+04  2.9333721E+04  2.8908267E+04
  2.8484406E+04  2.8062168E+04  2.7641585E+04  2.7222685E+04
  2.6805500E+04  2.6390062E+04  2.5976400E+04  2.5564548E+04
  2.5154536E+04  2.4746396E+04  2.4340162E+04  2.3935864E+04
  2.3533536E+04  2.3133212E+04  2.2734923E+04  2.2338704E+04
  2.1944589E+04  2.1552611E+04  2.1162803E+04  2.0775203E+04
  2.0389842E+04  2.0006758E+04  1.9625984E+04  1.9247556E+04
  1.8871510E+04  1.8497882E+04  1.8126709E+04  1.7758025E+04
  1.7391869E+04  1.7028278E+04  1.6667288E+04  1.6308938E+04
  1.5953264E+04  1.5600304E+04  1.5250098E+04  1.4902683E+04
  1.4558099E+04  1.4216384E+04  1.3877578E+04  1.3541720E+04
  1.3208850E+04  1.2879008E+04  1.2552236E+04  1.2228571E+04
  1.1908057E+04  1.1590734E+04  1.1276644E+04  1.0965827E+04
  1.0658327E+04  1.0354185E+04  1.0053444E+04  9.7561463E+03
  9.4623353E+03  9.1720538E+03  8.8853460E+03  8.6022555E+03
  8.3228258E+03  8.0471010E+03  7.7751270E+03  7.5069480E+03
  7.2426092E+03  6.9821560E+03  6.7256341E+03  6.4730895E+03
  6.2245685E+03  5.9801177E+03  5.7397837E+03  5.5036137E+03
  5.2716551E+03  5.0439554E+03  4.8205627E+03  4.6015250E+03
  4.3868909E+03  4.1767092E+03  3.9710288E+03  3.7698992E+03
  3.5733697E+03  3.3814904E+03  3.1943114E+03  3.0118832E+03
  2.8342565E+03  2.6614822E+03  2.4936117E+03  2.3306966E+03
  2.1727886E+03  2.0199401E+03  1.8722033E+03  1.7296312E+03
  1.5922766E+03  1.4601928E+03  1.3334335E+03  1.2120526E+03
  1.0961041E+03  9.8564265E+02  8.8072290E+02  7.8139988E+02
  6.8772903E+02  5.9976593E+02  5.1756649E+02  4.4118695E+02
  3.7068383E+02  3.0611393E+02  2.4753436E+02  1.9500252E+02
  1.4857611E+02  1.0831314E+02  7.4271900E+01  4.6510982E+01
  2.5089283E+01  1.0065996E+01  1.5006167E+00 -1.4885352E+00
 -4.0520094E+00 -6.6127339E+00 -9.1706978E+00 -1.1725891E+01
 -1.4278302E+01 -1.6827920E+01 -1.9374736E+01 -2.1918737E+01
 -2.4459914E+01 -2.6998256E+01 -2.9533752E+01 -3.2066391E+01
 -3.4596163E+01 -3.7123057E+01 -3.9647062E+01 -4.2168167E+01
 -4.4686363E+01 -4.7201638E+01 -4.9713981E+01 -5.2223382E+01
 -5.4729830E+01 -5.7233315E+01 -5.9733826E+01 -6.2231351E+01
 -6.4725881E+01 -6.7217405E+01 -6.9705912E+01 -7.2191391E+01
 -7.4673832E+01 -7.7153220E+01 -7.9629555E+01 -8.2102815E+01
 -8.4573000E+01 -8.7040088E+01 -8.9504070E+01 -9.1964948E+01
 -9.4422690E+01 -9.6877305E+01 -9.9328778E+01 -1.0177709E+02
 -1.0422224E+02 -1.0666421E+02 -1.0910299E+02 -1.1153857E+02
 -1.1397094E+02 -1.1640009E+02 -1.1882602E+02 -1.2124870E+02
 -1.2366812E+02 -1.2608429E+02 -1.2849719E+02 -1.3090679E+02
 -1.3331310E+02 -1.3571611E+02 -1.3811580E+02 -1.4051216E+02
 -1.4290519E+02 -1.4529487E+02 -1.4768119E+02 -1.5006413E+02
 -1.5244370E+02 -1.5481988E+02 -1.5719266E+02 -1.5956202E+02
 -1.6192796E+02 -1.6429046E+02 -1.6664953E+02 -1.6900513E+02
 -1.7135727E+02 -1.7370593E+02 -1.7605111E+02 -1.7839279E+02
 -1.8073096E+02 -1.8306560E+02 -1.8539672E+02 -1.8772430E+02
 -1.9004834E+02 -1.9236880E+02 -1.9468569E+02 -1.9699900E+02
 -1.9930871E+02 -2.0161482E+02 -2.0391731E+02 -2.0621618E+02
 -2.0851142E+02 -2.1080300E+02 -2.1309092E+02 -2.1537518E+02
 -2.1765575E+02 -2.1993263E+02 -2.2220582E+02 -2.2447529E+02
 -2.2674104E+02 -2.2900306E+02 -2.3126133E+02 -2.3351585E+02
 -2.3576660E+02 -2.3801357E+02 -2.4025676E+02 -2.4249616E+02
 -2.4473174E+02 -2.4696350E+02 -2.4919145E+02 -2.5141554E+02
 -2.5363578E+02 -2.5585217E+02 -2.5806468E+02 -2.6027330E+02
 -2.6247804E+02 -2.6467887E+02 -2.6687579E+02 -2.6906878E+02
 -2.7125783E+02 -2.7344294E+02 -2.7562409E+02 -2.7780127E+02
 -2.7997447E+02 -2.8214368E+02 -2.8430889E+02 -2.8647009E+02
 -2.8862727E+02 -2.9078042E+02 -2.9292952E+02 -2.9507456E+02
 -2.9721555E+02 -2.9935246E+02 -3.0148528E+02 -3.0361400E+02
 -3.0573863E+02 -3.0785912E+02 -3.0997550E+02 -3.1208773E+02
 -3.1419581E+02 -3.1629973E+02 -3.1839948E+02 -3.2049505E+02
 -3.2258642E+02 -3.2467359E+02 -3.2675655E+02 -3.2883528E+02
 -3.3090977E+02 -3.3298003E+02 -3.3504602E+02 -3.3710774E+02
 -3.3916519E+02 -3.4121834E+02 -3.4326720E+02 -3.4531175E+02
 -3.4735198E+02 -3.4938787E+02 -3.5141942E+02 -3.5344662E+02
 -3.5546945E+02 -3.5748791E+02 -3.5950199E+02 -3.6151166E+02
 -3.6351694E+02 -3.6551779E+02 -3.6751421E+02 -3.6950620E+02
 -3.7149374E+02 -3.7347682E+02 -3.7545542E+02 -3.7742955E+02
 -3.7939918E+02 -3.8136431E+02 -3.8332493E+02 -3.8528102E+02
 -3.8723258E+02 -3.8917958E+02 -3.9112204E+02 -3.9305993E+02
 -3.9499324E+02 -3.9692196E+02 -3.9884609E+02 -4.0076560E+02
 -4.0268049E+02 -4.0459075E+02 -4.0649637E+02 -4.0839734E+02
 -4.1029364E+02 -4.1218527E+02 -4.1407221E+02 -4.1595446E+02
 -4.1783201E+02 -4.1970483E+02 -4.2157293E+02 -4.2343629E+02
 -4.2529490E+02 -4.2714875E+02 -4.2899784E+02 -4.3084214E+02
 -4.3268165E+02 -4.3451636E+02 -4.3634625E+02 -4.3817132E+02
 -4.3999156E+02 -4.4180696E+02 -4.4361749E+02 -4.4542316E+02
 -4.4722395E+02 -4.4901986E+02 -4.5081086E+02 -4.5259696E+02
 -4.5437814E+02 -4.5615439E+02 -4.5792569E+02 -4.5969205E+02
 -4.6145344E+02 -4.6320986E+02 -4.6496129E+02 -4.6670773E+02
 -4.6844916E+02 -4.7018558E+02 -4.7191697E+02 -4.7364332E+02
 -4.7536463E+02 -4.7708088E+02 -4.7879206E+02 -4.8049815E+02
 -4.8219916E+02 -4.8389507E+02 -4.8558586E+02 -4.8727153E+02
 -4.8895206E+02 -4.9062746E+02 -4.9229769E+02 -4.9396276E+02
 -4.9562266E+02 -4.9727736E+02 -4.9892687E+02 -5.0057117E+02
 -5.0221025E+02 -5.0384411E+02 -5.0547272E+02 -5.0709608E+02
 -5.0871418E+02 -5.1032700E+02 -5.1193454E+02 -5.1353680E+02
 -5.1513374E+02 -5.1672537E+02 -5.1831167E+02 -5.1989264E+02
 -5.2146825E+02 -5.2303851E+02 -5.2460341E+02 -5.2616291E+02
 -5.2771704E+02 -5.2926576E+02 -5.3080907E+02 -5.3234696E+02
 -5.3387941E+02 -5.3540642E+02 -5.3692798E+02 -5.3844407E+02
 -5.3995468E+02 -5.4145981E+02 -5.4295944E+02 -5.4445357E+02
 -5.4594217E+02 -5.4742525E+02 -5.4890279E+02 -5.5037477E+02
 -5.5184120E+02 -5.5330205E+02 -5.5475732E+02 -5.5620699E+02
 -5.5765106E+02 -5.5908953E+02 -5.6052236E+02 -5.6194955E+02
 -5.6337110E+02 -5.6478699E+02 -5.6619722E+02 -5.6760176E+02
 -5.6900062E+02 -5.7039377E+02 -5.7178122E+02 -5.7316294E+02
 -5.7453893E+02 -5.7590918E+02 -5.7727367E+02 -5.7863240E+02
 -5.7998536E+02 -5.8133252E+02 -5.8267390E+02 -5.8400947E+02
 -5.8533921E+02 -5.8666313E+02 -5.8798121E+02 -5.8929344E+02
 -5.9059981E+02 -5.9190031E+02 -5.9319493E+02 -5.9448365E+02
 -5.9576647E+02 -5.9704337E+02 -5.9831435E+02 -5.9957940E+02
 -6.0083850E+02 -6.0209165E+02 -6.0333882E+02 -6.0458002E+02
 -6.0581523E+02 -6.0704444E+02 -6.0826763E+02 -6.0948482E+02
 -6.1069596E+02 -6.1190107E+02 -6.1310012E+02 -6.1429310E+02
 -6.1548002E+02 -6.1666085E+02 -6.1783558E+02 -6.1900421E+02
 -6.2016671E+02 -6.2132309E+02 -6.2247333E+02 -6.2361743E+02
 -6.2475536E+02 -6.2588712E+02 -6.2701271E+02 -6.2813210E+02
 -6.2924528E+02 -6.3035225E+02 -6.3145301E+02 -6.3254752E+02
 -6.3363579E+02 -6.3471780E+02 -6.3579355E+02 -6.3686302E+02
 -6.3792620E+02 -6.3898308E+02 -6.4003365E+02 -6.4107791E+02
 -6.4211582E+02 -6.4314740E+02 -6.4417263E+02 -6.4519150E+02
 -6.4620398E+02 -6.4721009E+02 -6.4820981E+02 -6.4920311E+02
 -6.5019000E+02 -6.5117046E+02 -6.5214449E+02 -6.5311206E+02
 -6.5407318E+02 -6.5502782E+02 -6.5597599E+02 -6.5691766E+02
 -6.5785283E+02 -6.5878149E+02 -6.5970363E+02 -6.6061923E+02
 -6.6152829E+02 -6.6243079E+02 -6.6332672E+02 -6.6421609E+02
 -6.6509886E+02 -6.6597503E+02 -6.6684460E+02 -6.6770754E+02
 -6.6856385E+02 -6.6941353E+02 -6.7025655E+02 -6.7109291E+02
 -6.7192260E+02 -6.7274560E+02 -6.7356191E+02 -6.7437152E+02
 -6.7517440E+02 -6.7597056E+02 -6.7675999E+02 -6.7754267E+02
 -6.7831858E+02 -6.7908773E+02 -6.7985010E+02 -6.8060567E+02
 -6.8135445E+02 -6.8209642E+02 -6.8283156E+02 -6.8355987E+02
 -6.8428133E+02 -6.8499594E+02 -6.8570369E+02 -6.8640455E+02
 -6.8709854E+02 -6.8778563E+02 -6.8846580E+02 -6.8913905E+02
 -6.8980538E+02 -6.9046477E+02 -6.9111721E+02 -6.9176268E+02
 -6.9240119E+02 -6.9303270E+02 -6.9365723E+02 -6.9427475E+02
 -6.9488525E+02 -6.9548873E+02 -6.9608518E+02 -6.9667457E+02
 -6.9725691E+02 -6.9783218E+02 -6.9840038E+02 -6.9896147E+02
 -6.9951548E+02 -7.0006236E+02 -7.0060213E+02 -7.0113476E+02
 -7.0166025E+02 -7.0217859E+02 -7.0268976E+02 -7.0319376E+02
 -7.0369057E+02 -7.0418018E+02 -7.0466259E+02 -7.0513778E+02
 -7.0560574E+02 -7.0606646E+02 -7.0651992E+02 -7.0696613E+02
 -7.0740507E+02 -7.0783672E+02 -7.0826108E+02 -7.0867814E+02
 -7.0908788E+02 -7.0949030E+02 -7.0988538E+02 -7.1027312E+02
 -7.1065349E+02 -7.1102651E+02 -7.1139214E+02 -7.1175038E+02
 -7.1210122E+02 -7.1244465E+02 -7.1278067E+02 -7.1310924E+02
 -7.1343038E+02 -7.1374406E+02 -7.1405028E+02 -7.1434902E+02
 -7.1464028E+02 -7.1492405E+02 -7.1520030E+02 -7.1546903E+02
 -7.1573024E+02 -7.1598392E+02 -7.1623004E+02 -7.1646860E+02
 -7.1669959E+02 -7.1692299E+02 -7.1713881E+02 -7.1734702E+02
 -7.1754762E+02 -7.1774060E+02 -7.1792594E+02 -7.1810363E+02
 -7.1827366E+02 -7.1843603E+02 -7.1859072E+02 -7.1873773E+02
 -7.1887703E+02 -7.1900862E+02 -7.1913250E+02 -7.1924864E+02
 -7.1935704E+02 -7.1945768E+02 -7.1955057E+02 -7.1963568E+02
 -7.1971301E+02 -7.1978253E+02 -7.1984426E+02 -7.1989816E+02
 -7.1994424E+02 -7.1998248E+02 -7.2001287E+02 -7.2003540E+02
 -7.2005006E+02 -7.2005684E+02 -7.2005573E+02 -7.2004672E+02
 -7.2002979E+02 -7.2000494E+02 -7.1997216E+02 -7.1993143E+02
 -7.1988275E+02 -7.1982609E+02 -7.1976146E+02 -7.1968884E+02
 -7.1960822E+02 -7.1951960E+02 -7.1942296E+02 -7.1931828E+02
 -7.1920556E+02 -7.1908479E+02 -7.1895596E+02 -7.1881906E+02
 -7.1867407E+02 -7.1852098E+02 -7.1835979E+02 -7.1819048E+02
 -7.1801305E+02 -7.1782748E+02 -7.1763376E+02 -7.1743188E+02
 -7.1722184E+02 -7.1700361E+02 -7.1677719E+02 -7.1654257E+02
 -7.1629973E+02 -7.1604868E+02 -7.1578939E+02 -7.1552186E+02
 -7.1524607E+02 -7.1496201E+02 -7.1466968E+02 -7.1436906E+02
 -7.1406014E+02 -7.1374292E+02 -7.1341737E+02 -7.1308349E+02
 -7.1274128E+02 -7.1239071E+02 -7.1203178E+02 -7.1166449E+02
 -7.1128880E+02 -7.1090472E+02 -7.1051224E+02 -7.1011133E+02
 -7.0970201E+02 -7.0928425E+02 -7.0885804E+02 -7.0842337E+02
 -7.0798023E+02 -7.0752861E+02 -7.0706851E+02 -7.0659989E+02
 -7.0612277E+02 -7.0563713E+02 -7.0514296E+02 -7.0464024E+02
 -7.0412897E+02 -7.0360913E+02 -7.0308071E+02 -7.0254371E+02
 -7.0199811E+02 -7.0144390E+02 -7.0088108E+02 -7.0030962E+02
 -6.9972953E+02 -6.9914078E+02 -6.9854337E+02 -6.9793730E+02
 -6.9732253E+02 -6.9669908E+02 -6.9606692E+02 -6.9542604E+02
 -6.9477644E+02 -6.9411811E+02 -6.9345102E+02 -6.9277518E+02
 -6.9209057E+02 -6.9139719E+02 -6.9069501E+02 -6.8998403E+02
 -6.8926424E+02 -6.8853563E+02 -6.8779819E+02 -6.8705190E+02
 -6.8629676E+02 -6.8553276E+02 -6.8475988E+02 -6.8397812E+02
 -6.8318745E+02 -6.8238788E+02 -6.8157940E+02 -6.8076198E+02
 -6.7993562E+02 -6.7910032E+02 -6.7825605E+02 -6.7740281E+02
 -6.7654060E+02 -6.7566938E+02 -6.7478917E+02 -6.7389994E+02
 -6.7300169E+02 -6.7209440E+02 -6.7117806E+02 -6.7025267E+02
 -6.6931820E+02 -6.6837467E+02 -6.6742204E+02 -6.6646031E+02
 -6.6548947E+02 -6.6450951E+02 -6.6352042E+02 -6.6252218E+02
 -6.6151480E+02 -6.6049825E+02 -6.5947253E+02 -6.5843762E+02
 -6.5739350E+02 -6.5634020E+02 -6.5527766E+02 -6.5420591E+02
 -6.5312491E+02 -6.5203466E+02 -6.5093516E+02 -6.4982638E+02
 -6.4870832E+02 -6.4758097E+02 -6.4644432E+02 -6.4529835E+02
 -6.4414306E+02 -6.4297844E+02 -6.4180447E+02 -6.4062114E+02
 -6.3942845E+02 -6.3822637E+02 -6.3701491E+02 -6.3579405E+02
 -6.3456378E+02 -6.3332409E+02 -6.3207497E+02 -6.3081641E+02
 -6.2954840E+02 -6.2827092E+02 -6.2698397E+02 -6.2568753E+02
 -6.2438160E+02 -6.2306616E+02 -6.2174121E+02 -6.2040673E+02
 -6.1906271E+02 -6.1770914E+02 -6.1634601E+02 -6.1497332E+02
 -6.1359104E+02 -6.1219917E+02 -6.1079770E+02 -6.0938661E+02
 -6.0796591E+02 -6.0653556E+02 -6.0509558E+02 -6.0364593E+02
 -6.0218663E+02 -6.0071764E+02 -5.9923897E+02 -5.9775059E+02
 -5.9625251E+02 -5.9474471E+02 -5.9322719E+02 -5.9169991E+02
 -5.9015627E+02 -5.8861973E+02 -5.8708787E+02 -5.8556066E+02
 -5.8403807E+02 -5.8252010E+02 -5.8100674E+02 -5.7949796E+02
 -5.7799375E+02 -5.7649409E+02 -5.7499897E+02 -5.7350837E+02
 -5.7202227E+02 -5.7054067E+02 -5.6906354E+02 -5.6759087E+02
 -5.6612265E+02 -5.6465886E+02 -5.6319948E+02 -5.6174450E+02
 -5.6029390E+02 -5.5884767E+02 -5.5740579E+02 -5.5596825E+02
 -5.5453504E+02 -5.5310613E+02 -5.5168152E+02 -5.5026119E+02
 -5.4884512E+02 -5.4743330E+02 -5.4602571E+02 -5.4462235E+02
 -5.4322319E+02 -5.4182822E+02 -5.4043744E+02 -5.3905082E+02
 -5.3766833E+02 -5.3629000E+02 -5.3491577E+02 -5.3354566E+02
 -5.3217964E+02 -5.3081770E+02 -5.2945982E+02 -5.2810599E+02
 -5.2675620E+02 -5.2541043E+02 -5.2406867E+02 -5.2273091E+02
 -5.2139713E+02 -5.2006732E+02 -5.1874146E+02 -5.1741955E+02
 -5.1610156E+02 -5.1478749E+02 -5.1347732E+02 -5.1217104E+02
 -5.1086864E+02 -5.0957009E+02 -5.0827540E+02 -5.0698454E+02
 -5.0569751E+02 -5.0441429E+02 -5.0313486E+02 -5.0185922E+02
 -5.0058734E+02 -4.9931924E+02 -4.9805487E+02 -4.9679423E+02
 -4.9553732E+02 -4.9428413E+02 -4.9303462E+02 -4.9178879E+02
 -4.9054664E+02 -4.8930815E+02 -4.8807330E+02 -4.8684209E+02
 -4.8561450E+02 -4.8439052E+02 -4.8317014E+02 -4.8195334E+02
 -4.8074012E+02 -4.7953046E+02 -4.7832434E+02 -4.7712176E+02
 -4.7592272E+02 -4.7472719E+02 -4.7353515E+02 -4.7234661E+02
 -4.7116154E+02 -4.6997995E+02 -4.6880181E+02 -4.6762712E+02
 -4.6645585E+02 -4.6528801E+02 -4.6412357E+02 -4.6296254E+02
 -4.6180490E+02 -4.6065062E+02 -4.5949972E+02 -4.5835217E+02
 -4.5720795E+02 -4.5606707E+02 -4.5492951E+02 -4.5379526E+02
 -4.5266431E+02 -4.5153664E+02 -4.5041225E+02 -4.4929112E+02
 -4.4817326E+02 -4.4705863E+02 -4.4594723E+02 -4.4483906E+02
 -4.4373410E+02 -4.4263234E+02 -4.4153377E+02 -4.4043838E+02
 -4.3934616E+02 -4.3825709E+02 -4.3717118E+02 -4.3608841E+02
 -4.3500875E+02 -4.3393223E+02 -4.3285880E+02 -4.3178847E+02
 -4.3072123E+02 -4.2965707E+02 -4.2859597E+02 -4.2753792E+02
 -4.2648293E+02 -4.2543096E+02 -4.2438203E+02 -4.2333611E+02
 -4.2229319E+02 -4.2125328E+02 -4.2021635E+02 -4.1918240E+02
 -4.1815141E+02 -4.1712338E+02 -4.1609829E+02 -4.1507615E+02
 -4.1405693E+02 -4.1304063E+02 -4.1202725E+02 -4.1101676E+02
 -4.1000915E+02 -4.0900444E+02 -4.0800259E+02 -4.0700360E+02
 -4.0600747E+02 -4.0501418E+02 -4.0402373E+02 -4.0303610E+02
 -4.0205128E+02 -4.0106927E+02 -4.0009006E+02 -3.9911363E+02
 -3.9813998E+02 -3.9716911E+02 -3.9620099E+02 -3.9523563E+02
 -3.9427301E+02 -3.9331313E+02 -3.9235597E+02 -3.9140153E+02
 -3.9044979E+02 -3.8950076E+02 -3.8855441E+02 -3.8761074E+02
 -3.8666975E+02 -3.8573142E+02 -3.8479575E+02 -3.8386272E+02
 -3.8293233E+02 -3.8200457E+02 -3.8107944E+02 -3.8015692E+02
 -3.7923700E+02 -3.7831967E+02 -3.7740494E+02 -3.7649278E+02
 -3.7558319E+02 -3.7467617E+02 -3.7377170E+02 -3.7286978E+02
 -3.7197040E+02 -3.7107354E+02 -3.7017921E+02 -3.6928739E+02
 -3.6839808E+02 -3.6751127E+02 -3.6662694E+02 -3.6574509E+02
 -3.6486572E+02 -3.6398882E+02 -3.6311437E+02 -3.6224237E+02
 -3.6137282E+02 -3.6050570E+02 -3.5964101E+02 -3.5877872E+02
 -3.5791886E+02 -3.5706140E+02 -3.5620634E+02 -3.5535365E+02
 -3.5450336E+02 -3.5365544E+02 -3.5280988E+02 -3.5196668E+02
 -3.5112582E+02 -3.5028731E+02 -3.4945114E+02 -3.4861730E+02
 -3.4778577E+02 -3.4695656E+02 -3.4612965E+02 -3.4530504E+02
 -3.4448272E+02 -3.4366269E+02 -3.4284493E+02 -3.4202944E+02
 -3.4121621E+02 -3.4040525E+02 -3.3959652E+02 -3.3879004E+02
 -3.3798579E+02 -3.3718377E+02 -3.3638396E+02 -3.3558638E+02
 -3.3479099E+02 -3.3399780E+02 -3.3320681E+02 -3.3241800E+02
 -3.3163136E+02 -3.3084690E+02 -3.3006461E+02 -3.2928446E+02
 -3.2850647E+02 -3.2773063E+02 -3.2695692E+02 -3.2618534E+02
 -3.2541588E+02 -3.2464854E+02 -3.2388332E+02 -3.2312019E+02
 -3.2235916E+02 -3.2160023E+02 -3.2084337E+02 -3.2008859E+02
 -3.1933589E+02 -3.1858524E+02 -3.1783666E+02 -3.1709012E+02
 -3.1634564E+02 -3.1560319E+02 -3.1486277E+02 -3.1412438E+02
 -3.1338800E+02 -3.1265365E+02 -3.1192130E+02 -3.1119094E+02
 -3.1046258E+02 -3.0973622E+02 -3.0901183E+02 -3.0828941E+02
 -3.0756897E+02 -3.0685049E+02 -3.0613397E+02 -3.0541940E+02
 -3.0470678E+02 -3.0399609E+02 -3.0328733E+02 -3.0258051E+02
 -3.0187561E+02 -3.0117262E+02 -3.0047153E+02 -2.9977236E+02
 -2.9907508E+02 -2.9837969E+02 -2.9768619E+02 -2.9699456E+02
 -2.9630482E+02 -2.9561693E+02 -2.9493092E+02 -2.9424675E+02
 -2.9356445E+02 -2.9288398E+02 -2.9220535E+02 -2.9152856E+02
 -2.9085359E+02 -2.9018045E+02 -2.8950913E+02 -2.8883961E+02
 -2.8817190E+02 -2.8750600E+02 -2.8684188E+02 -2.8617956E+02
 -2.8551902E+02 -2.8486025E+02 -2.8420326E+02 -2.8354804E+02
 -2.8289458E+02 -2.8224287E+02 -2.8159292E+02 -2.8094471E+02
 -2.8029824E+02 -2.7965351E+02 -2.7901050E+02 -2.7836922E+02
 -2.7772966E+02 -2.7709181E+02 -2.7645567E+02 -2.7582124E+02
 -2.7518850E+02 -2.7455745E+02 -2.7392810E+02 -2.7330042E+02
 -2.7267442E+02 -2.7205010E+02 -2.7142744E+02 -2.7080644E+02
 -2.7018710E+02 -2.6956941E+02 -2.6895337E+02 -2.6833898E+02
 -2.6772621E+02 -2.6711508E+02 -2.6650558E+02 -2.6589770E+02
 -2.6529143E+02 -2.6468678E+02 -2.6408373E+02 -2.6348229E+02
 -2.6288244E+02 -2.6228419E+02 -2.6168753E+02 -2.6109245E+02
 -2.6049894E+02 -2.5990701E+02 -2.5931665E+02 -2.5872785E+02
 -2.5814061E+02 -2.5755492E+02 -2.5697079E+02 -2.5638820E+02
 -2.5580715E+02 -2.5522763E+02 -2.5464965E+02 -2.5407320E+02
 -2.5349826E+02 -2.5292485E+02 -2.5235294E+02 -2.5178255E+02
 -2.5121365E+02 -2.5064626E+02 -2.5008036E+02 -2.4951595E+02
 -2.4895303E+02 -2.4839159E+02 -2.4783162E+02 -2.4727313E+02
 -2.4671610E+02 -2.4616054E+02 -2.4560643E+02 -2.4505379E+02
 -2.4450259E+02 -2.4395283E+02 -2.4340452E+02 -2.4285765E+02
 -2.4231221E+02 -2.4176819E+02 -2.4122561E+02 -2.4068444E+02
 -2.4014469E+02 -2.3960635E+02 -2.3906942E+02 -2.3853389E+02
 -2.3799976E+02 -2.3746702E+02 -2.3693567E+02 -2.3640572E+02
 -2.3587714E+02 -2.3534994E+02 -2.3482412E+02 -2.3429966E+02
 -2.3377658E+02 -2.3325485E+02 -2.3273449E+02 -2.3221547E+02
 -2.3169781E+02 -2.3118149E+02 -2.3066651E+02 -2.3015288E+02
 -2.2964057E+02 -2.2912960E+02 -2.2861995E+02 -2.2811162E+02
 -2.2760462E+02 -2.2709892E+02 -2.2659453E+02 -2.2609145E+02
 -2.2558968E+02 -2.2508921E+02 -2.2459003E+02 -2.2409213E+02
 -2.2359553E+02 -2.2310021E+02 -2.2260617E+02 -2.2211341E+02
 -2.2162192E+02 -2.2113170E+02 -2.2064273E+02 -2.2015504E+02
 -2.1966860E+02 -2.1918341E+02 -2.1869947E+02 -2.1821678E+02
 -2.1773533E+02 -2.1725512E+02 -2.1677615E+02 -2.1629840E+02
 -2.1582189E+02 -2.1534659E+02 -2.1487253E+02 -2.1439967E+02
 -2.1392804E+02 -2.1345761E+02 -2.1298838E+02 -2.1252036E+02
 -2.1205354E+02 -2.1158792E+02 -2.1112348E+02 -2.1066023E+02
 -2.1019818E+02 -2.0973730E+02 -2.0927760E+02 -2.0881908E+02
 -2.0836173E+02 -2.0790554E+02 -2.0745053E+02 -2.0699667E+02
 -2.0654397E+02 -2.0609243E+02 -2.0564204E+02 -2.0519279E+02
 -2.0474469E+02 -2.0429773E+02 -2.0385191E+02 -2.0340722E+02
 -2.0296367E+02 -2.0252124E+02 -2.0207993E+02 -2.0163975E+02
 -2.0120069E+02 -2.0076275E+02 -2.0032591E+02 -1.9989018E+02
 -1.9945556E+02 -1.9902203E+02 -1.9858961E+02 -1.9815829E+02
 -1.9772806E+02 -1.9729892E+02 -1.9687085E+02 -1.9644388E+02
 -1.9601798E+02 -1.9559317E+02 -1.9516943E+02 -1.9474675E+02
 -1.9432514E+02 -1.9390460E+02 -1.9348513E+02 -1.9306670E+02
 -1.9264934E+02 -1.9223303E+02 -1.9181776E+02 -1.9140354E+02
 -1.9099037E+02 -1.9057823E+02 -1.9016713E+02 -1.8975707E+02
 -1.8934804E+02 -1.8894003E+02 -1.8853305E+02 -1.8812710E+02
 -1.8772216E+02 -1.8731824E+02 -1.8691533E+02 -1.8651344E+02
 -1.8611255E+02 -1.8571266E+02 -1.8531378E+02 -1.8491590E+02
 -1.8451901E+02 -1.8412312E+02 -1.8372822E+02 -1.8333431E+02
 -1.8294137E+02 -1.8254943E+02 -1.8215846E+02 -1.8176847E+02
 -1.8137945E+02 -1.8099140E+02 -1.8060433E+02 -1.8021821E+02
 -1.7983307E+02 -1.7944887E+02 -1.7906564E+02 -1.7868336E+02
 -1.7830204E+02 -1.7792166E+02 -1.7754223E+02 -1.7716374E+02
 -1.7678619E+02 -1.7640959E+02 -1.7603391E+02 -1.7565917E+02
 -1.7528537E+02 -1.7491248E+02 -1.7454053E+02 -1.7416949E+02
 -1.7379938E+02 -1.7343018E+02 -1.7306190E+02 -1.7269453E+02
 -1.7232807E+02 -1.7196251E+02 -1.7159787E+02 -1.7123412E+02
 -1.7087127E+02 -1.7050932E+02 -1.7014826E+02 -1.6978810E+02
 -1.6942882E+02 -1.6907043E+02 -1.6871293E+02 -1.6835630E+02
 -1.6800056E+02 -1.6764569E+02 -1.6729169E+02 -1.6693857E+02
 -1.6658632E+02 -1.6623494E+02 -1.6588442E+02 -1.6553475E+02
 -1.6518596E+02 -1.6483801E+02 -1.6449092E+02 -1.6414469E+02
 -1.6379930E+02 -1.6345476E+02 -1.6311107E+02 -1.6276822E+02
 -1.6242621E+02 -1.6208504E+02 -1.6174470E+02 -1.6140520E+02
 -1.6106653E+02 -1.6072868E+02 -1.6039167E+02 -1.6005548E+02
 -1.5972011E+02 -1.5938555E+02 -1.5905183E+02 -1.5871890E+02
 -1.5838680E+02 -1.5805550E+02 -1.5772502E+02 -1.5739534E+02
 -1.5706646E+02 -1.5673838E+02 -1.5641111E+02 -1.5608462E+02
 -1.5575894E+02 -1.5543405E+02 -1.5510995E+02 -1.5478663E+02
 -1.5446411E+02 -1.5414236E+02 -1.5382139E+02 -1.5350121E+02
 -1.5318181E+02 -1.5286318E+02 -1.5254532E+02 -1.5222823E+02
 -1.5191192E+02 -1.5159636E+02 -1.5128157E+02 -1.5096755E+02
 -1.5065429E+02 -1.5034178E+02 -1.5003003E+02 -1.4971903E+02
 -1.4940878E+02 -1.4909929E+02 -1.4879054E+02 -1.4848254E+02
 -1.4817528E+02 -1.4786876E+02 -1.4756299E+02 -1.4725795E+02
 -1.4695364E+02 -1.4665007E+02 -1.4634724E+02 -1.4604512E+02
 -1.4574374E+02 -1.4544308E+02 -1.4514315E+02 -1.4484394E+02
 -1.4454545E+02 -1.4424767E+02 -1.4395061E+02 -1.4365426E+02
 -1.4335862E+02 -1.4306370E+02 -1.4276948E+02 -1.4247597E+02
 -1.4218316E+02 -1.4189105E+02 -1.4159965E+02 -1.4130893E+02
 -1.4101892E+02 -1.4072960E+02 -1.4044098E+02 -1.4015304E+02
 -1.3986579E+02 -1.3957923E+02 -1.3929335E+02 -1.3900817E+02
 -1.3872365E+02 -1.3843982E+02 -1.3815666E+02 -1.3787418E+02
 -1.3759238E+02 -1.3731124E+02 -1.3703077E+02 -1.3675097E+02
 -1.3647185E+02 -1.3619338E+02 -1.3591557E+02 -1.3563843E+02
 -1.3536194E+02 -1.3508612E+02 -1.3481095E+02 -1.3453643E+02
 -1.3426256E+02 -1.3398935E+02 -1.3371678E+02 -1.3344486E+02
 -1.3317359E+02 -1.3290296E+02 -1.3263296E+02 -1.3236362E+02
 -1.3209490E+02 -1.3182683E+02 -1.3155938E+02 -1.3129257E+02
 -1.3102640E+02 -1.3076084E+02 -1.3049592E+02 -1.3023163E+02
 -1.2996796E+02 -1.2970491E+02 -1.2944248E+02 -1.2918068E+02
 -1.2891948E+02 -1.2865891E+02 -1.2839894E+02 -1.2813960E+02
 -1.2788086E+02 -1.2762273E+02 -1.2736521E+02 -1.2710830E+02
 -1.2685199E+02 -1.2659628E+02 -1.2634118E+02 -1.2608667E+02
 -1.2583277E+02 -1.2557945E+02 -1.2532673E+02 -1.2507461E+02
 -1.2482308E+02 -1.2457214E+02 -1.2432178E+02 -1.2407201E+02
 -1.2382283E+02 -1.2357423E+02 -1.2332621E+02 -1.2307878E+02
 -1.2283193E+02 -1.2258564E+02 -1.2233994E+02 -1.2209481E+02
 -1.2185025E+02 -1.2160627E+02 -1.2136286E+02 -1.2112001E+02
 -1.2087773E+02 -1.2063601E+02 -1.2039486E+02 -1.2015427E+02
 -1.1991424E+02 -1.1967477E+02 -1.1943586E+02 -1.1919751E+02
 -1.1895971E+02 -1.1872246E+02 -1.1848577E+02 -1.1824962E+02
 -1.1801402E+02 -1.1777897E+02 -1.1754447E+02 -1.1731052E+02
 -1.1707710E+02 -1.1684423E+02 -1.1661189E+02 -1.1638010E+02
 -1.1614884E+02 -1.1591812E+02 -1.1568794E+02 -1.1545828E+02
 -1.1522916E+02 -1.1500057E+02 -1.1477250E+02 -1.1454497E+02
 -1.1431796E+02 -1.1409148E+02 -1.1386551E+02 -1.1364008E+02
 -1.1341516E+02 -1.1319076E+02 -1.1296688E+02 -1.1274351E+02
 -1.1252066E+02 -1.1229833E+02 -1.1207650E+02 -1.1185519E+02
 -1.1163439E+02 -1.1141409E+02 -1.1119430E+02 -1.1097502E+02
 -1.1075624E+02 -1.1053797E+02 -1.1032019E+02 -1.1010293E+02
 -1.0988615E+02 -1.0966988E+02 -1.0945409E+02 -1.0923881E+02
 -1.0902402E+02 -1.0880972E+02 -1.0859591E+02 -1.0838260E+02
 -1.0816977E+02 -1.0795743E+02 -1.0774558E+02 -1.0753421E+02
 -1.0732332E+02 -1.0711292E+02 -1.0690300E+02 -1.0669355E+02
 -1.0648459E+02 -1.0627610E+02 -1.0606809E+02 -1.0586056E+02
 -1.0565349E+02 -1.0544690E+02 -1.0524079E+02 -1.0503514E+02
 -1.0482996E+02 -1.0462524E+02 -1.0442100E+02 -1.0421722E+02
 -1.0401390E+02 -1.0381104E+02 -1.0360865E+02 -1.0340672E+02
 -1.0320524E+02 -1.0300423E+02 -1.0280366E+02 -1.0260356E+02
 -1.0240391E+02 -1.0220471E+02 -1.0200597E+02 -1.0180768E+02
 -1.0160983E+02 -1.0141244E+02 -1.0121549E+02 -1.0101899E+02
 -1.0082292E+02 -1.0062731E+02 -1.0043214E+02 -1.0023741E+02
 -1.0004312E+02 -9.9849270E+01 -9.9655853E+01 -9.9462878E+01
 -9.9270338E+01 -9.9078233E+01 -9.8886563E+01 -9.8695320E+01
 -9.8504513E+01 -9.8314140E+01 -9.8124188E+01 -9.7934670E+01
 -9.7745573E+01 -9.7556910E+01 -9.7368668E+01 -9.7180845E+01
 -9.6993450E+01 -9.6806475E+01 -9.6619920E+01 -9.6433785E+01
 -9.6248063E+01 -9.6062768E+01 -9.5877885E+01 -9.5693415E+01
 -9.5509358E+01 -9.5325713E+01 -9.5142488E+01 -9.4959668E+01
 -9.4777253E+01 -9.4595250E+01 -9.4413660E+01 -9.4232475E+01
 -9.4051688E+01 -9.3871313E+01 -9.3691343E+01 -9.3511770E+01
 -9.3332595E+01 -9.3153833E+01 -9.2975460E+01 -9.2797485E+01
 -9.2619915E+01 -9.2442735E+01 -9.2265953E+01 -9.2089560E+01
 -9.1913565E+01 -9.1737968E+01 -9.1562753E+01 -9.1387935E+01
 -9.1213500E+01 -9.1039455E+01 -9.0865800E+01 -9.0692528E+01
 -9.0519645E+01 -9.0347145E+01 -9.0175028E+01 -9.0003293E+01
 -8.9831940E+01 -8.9660963E+01 -8.9490375E+01 -8.9320155E+01
 -8.9150318E+01 -8.8980863E+01 -8.8811775E+01 -8.8643063E+01
 -8.8474733E+01 -8.8306770E+01 -8.8139175E+01 -8.7971955E+01
 -8.7805103E+01 -8.7638625E+01 -8.7472508E+01 -8.7306765E+01
 -8.7141383E+01 -8.6976368E+01 -8.6811720E+01 -8.6647433E+01
 -8.6483505E+01 -8.6319945E+01 -8.6156745E+01 -8.5993905E+01
 -8.5831418E+01 -8.5669298E+01 -8.5507530E+01 -8.5346115E+01
 -8.5185060E+01 -8.5024365E+01 -8.4864015E+01 -8.4704018E+01
 -8.4544373E+01 -8.4385080E+01 -8.4226140E+01 -8.4067545E+01
 -8.3909303E+01 -8.3751405E+01 -8.3593853E+01 -8.3436653E+01
 -8.3279790E+01 -8.3123273E+01 -8.2967100E+01 -8.2811273E+01
 -8.2655783E+01 -8.2500630E+01 -8.2345823E+01 -8.2191353E+01
 -8.2037220E+01 -8.1883418E+01 -8.1729960E+01 -8.1576840E+01
 -8.1424050E+01 -8.1271590E+01 -8.1119468E+01 -8.0967683E+01
 -8.0816220E+01 -8.0665088E+01 -8.0514293E+01 -8.0363820E+01
 -8.0213678E+01 -8.0063865E+01 -7.9914375E+01 -7.9765208E+01
 -7.9616370E+01 -7.9467855E+01 -7.9319663E+01 -7.9171793E+01
 -7.9024245E+01 -7.8877020E+01 -7.8730110E+01 -7.8583523E+01
 -7.8437258E+01 -7.8291300E+01 -7.8145665E+01 -7.8000345E+01
 -7.7855340E+01 -7.7710650E+01 -7.7566275E+01 -7.7422215E+01
 -7.7278463E+01 -7.7135018E+01 -7.6991888E+01 -7.6849073E+01
 -7.6706558E+01 -7.6564358E+01 -7.6422465E+01 -7.6280873E+01
 -7.6139588E+01 -7.5998610E+01 -7.5857940E+01 -7.5717570E+01
 -7.5577508E+01 -7.5437738E+01 -7.5298275E+01 -7.5159113E+01
 -7.5020250E+01 -7.4881691E+01 -7.4743427E+01 -7.4605460E+01
 -7.4467790E+01 -7.4330417E+01 -7.4193339E+01 -7.4056556E+01
 -7.3920068E+01 -7.3783872E+01 -7.3647970E+01 -7.3512359E+01
 -7.3377039E+01 -7.3242011E+01 -7.3107271E+01 -7.2972821E+01
 -7.2838659E+01 -7.2704786E+01 -7.2571198E+01 -7.2437897E+01
 -7.2304882E+01 -7.2172152E+01 -7.2039706E+01 -7.1907543E+01
 -7.1775663E+01 -7.1644065E+01 -7.1512749E+01 -7.1381713E+01
 -7.1250957E+01 -7.1120481E+01 -7.0990283E+01 -7.0860364E+01
 -7.0730721E+01 -7.0601356E+01 -7.0472266E+01 -7.0343452E+01
 -7.0214912E+01 -7.0086646E+01 -6.9958653E+01 -6.9830933E+01
 -6.9703485E+01 -6.9576308E+01 -6.9449402E+01 -6.9322766E+01
 -6.9196399E+01 -6.9070301E+01 -6.8944471E+01 -6.8818908E+01
 -6.8693612E+01 -6.8568582E+01 -6.8443817E+01 -6.8319317E+01
 -6.8195081E+01 -6.8071109E+01 -6.7947400E+01 -6.7823953E+01
 -6.7700767E+01 -6.7577843E+01 -6.7455178E+01 -6.7332773E+01
 -6.7210628E+01 -6.7088741E+01 -6.6967112E+01 -6.6845739E+01
 -6.6724624E+01 -6.6603764E+01 -6.6483160E+01 -6.6362810E+01
 -6.6242714E+01 -6.6122873E+01 -6.6003284E+01 -6.5883947E+01
 -6.5764861E+01 -6.5646027E+01 -6.5527443E+01 -6.5409109E+01
 -6.5291024E+01 -6.5173188E+01 -6.5055600E+01 -6.4938260E+01
 -6.4821166E+01 -6.4704318E+01 -6.4587716E+01 -6.4471360E+01
 -6.4355248E+01 -6.4239379E+01 -6.4123754E+01 -6.4008372E+01
 -6.3893231E+01 -6.3778333E+01 -6.3663675E+01 -6.3549258E+01
 -6.3435080E+01 -6.3321143E+01 -6.3207443E+01 -6.3093982E+01
 -6.2980758E+01 -6.2867771E+01 -6.2755021E+01 -6.2642506E+01
 -6.2530227E+01 -6.2418182E+01 -6.2306372E+01 -6.2194795E+01
 -6.2083451E+01 -6.1972340E+01 -6.1861460E+01 -6.1750813E+01
 -6.1640396E+01 -6.1530209E+01 -6.1420251E+01 -6.1310523E+01
 -6.1201024E+01 -6.1091753E+01 -6.0982709E+01 -6.0873893E+01
 -6.0765302E+01 -6.0656938E+01 -6.0548799E+01 -6.0440885E+01
 -6.0333195E+01 -6.0225729E+01 -6.0118487E+01 -6.0011466E+01
 -5.9904668E+01 -5.9798093E+01 -5.9691737E+01 -5.9585603E+01
 -5.9479689E+01 -5.9373995E+01 -5.9268518E+01 -5.9163262E+01
 -5.9058223E+01 -5.8953401E+01 -5.8848797E+01 -5.8744409E+01
 -5.8640237E+01 -5.8536280E+01 -5.8432538E+01 -5.8329011E+01
 -5.8225697E+01 -5.8122597E+01 -5.8019711E+01 -5.7917036E+01
 -5.7814573E+01 -5.7712322E+01 -5.7610282E+01 -5.7508451E+01
 -5.7406832E+01 -5.7305421E+01 -5.7204220E+01 -5.7103226E+01
 -5.7002441E+01 -5.6901863E+01 -5.6801492E+01 -5.6701328E+01
 -5.6601370E+01 -5.6501618E+01 -5.6402070E+01 -5.6302727E+01
 -5.6203588E+01 -5.6104652E+01 -5.6005920E+01 -5.5907390E+01
 -5.5809062E+01 -5.5710937E+01 -5.5613012E+01 -5.5515289E+01
 -5.5417765E+01 -5.5320441E+01 -5.5223317E+01 -5.5126391E+01
 -5.5029665E+01 -5.4933135E+01 -5.4836804E+01 -5.4740669E+01
 -5.4644731E+01 -5.4548989E+01 -5.4453443E+01 -5.4358091E+01
 -5.4262935E+01 -5.4167973E+01 -5.4073205E+01 -5.3978630E+01
 -5.3884248E+01 -5.3790059E+01 -5.3696061E+01 -5.3602255E+01
 -5.3508641E+01 -5.3415216E+01 -5.3321983E+01 -5.3228939E+01
 -5.3136084E+01 -5.3043418E+01 -5.2950941E+01 -5.2858652E+01
 -5.2766550E+01 -5.2674635E+01 -5.2582908E+01 -5.2491367E+01
 -5.2400011E+01 -5.2308841E+01 -5.2217856E+01 -5.2127055E+01
 -5.2036439E+01 -5.1946007E+01 -5.1855758E+01 -5.1765691E+01
 -5.1675807E+01 -5.1586105E+01 -5.1496585E+01 -5.1407246E+01
 -5.1318087E+01 -5.1229109E+01 -5.1140311E+01 -5.1051692E+01
 -5.0963253E+01 -5.0874992E+01 -5.0786909E+01 -5.0699005E+01
 -5.0611278E+01 -5.0523728E+01 -5.0436354E+01 -5.0349157E+01
 -5.0262136E+01 -5.0175290E+01 -5.0088619E+01 -5.0002122E+01
 -4.9915800E+01 -4.9829651E+01 -4.9743677E+01 -4.9657875E+01
 -4.9572245E+01 -4.9486788E+01 -4.9401503E+01 -4.9316390E+01
 -4.9231447E+01 -4.9146674E+01 -4.9062072E+01 -4.8977640E+01
 -4.8893378E+01 -4.8809285E+01 -4.8725360E+01 -4.8641603E+01
 -4.8558014E+01 -4.8474593E+01 -4.8391340E+01 -4.8308252E+01
 -4.8225332E+01 -4.8142577E+01 -4.8059988E+01 -4.7977564E+01
 -4.7895305E+01 -4.7813210E+01 -4.7731280E+01 -4.7649513E+01
 -4.7567910E+01 -4.7486470E+01 -4.7405192E+01 -4.7324077E+01
 -4.7243123E+01 -4.7162331E+01 -4.7081701E+01 -4.7001230E+01
 -4.6920921E+01 -4.6840772E+01 -4.6760781E+01 -4.6680951E+01
 -4.6601279E+01 -4.6521766E+01 -4.6442411E+01 -4.6363214E+01
 -4.6284175E+01 -4.6205293E+01 -4.6126568E+01 -4.6047998E+01
 -4.5969585E+01 -4.5891328E+01 -4.5813227E+01 -4.5735280E+01
 -4.5657488E+01 -4.5579850E+01 -4.5502366E+01 -4.5425036E+01
 -4.5347859E+01 -4.5270835E+01 -4.5193964E+01 -4.5117245E+01
 -4.5040677E+01 -4.4964262E+01 -4.4887997E+01 -4.4811884E+01
 -4.4735921E+01 -4.4660108E+01 -4.4584445E+01 -4.4508931E+01
 -4.4433567E+01 -4.4358351E+01 -4.4283284E+01 -4.4208365E+01
 -4.4133594E+01 -4.4058971E+01 -4.3984495E+01 -4.3910165E+01
 -4.3835982E+01 -4.3761945E+01 -4.3688054E+01 -4.3614309E+01
 -4.3540709E+01 -4.3467253E+01 -4.3393942E+01 -4.3320776E+01
 -4.3247753E+01 -4.3174874E+01 -4.3102138E+01 -4.3029545E+01
 -4.2957094E+01 -4.2884786E+01 -4.2812620E+01 -4.2740595E+01
 -4.2668712E+01 -4.2596969E+01 -4.2525368E+01 -4.2453907E+01
 -4.2382586E+01 -4.2311405E+01 -4.2240362E+01 -4.2169460E+01
 -4.2098696E+01 -4.2028070E+01 -4.1957583E+01 -4.1887233E+01
 -4.1817021E+01 -4.1746947E+01 -4.1677010E+01 -4.1607209E+01
 -4.1537543E+01 -4.1468015E+01 -4.1398622E+01 -4.1329365E+01
 -4.1260243E+01 -4.1191255E+01 -4.1122402E+01 -4.1053684E+01
 -4.0985099E+01 -4.0916648E+01 -4.0848330E+01 -4.0780145E+01
 -4.0712093E+01 -4.0644174E+01 -4.0576386E+01 -4.0508731E+01
 -4.0441207E+01 -4.0373814E+01 -4.0306553E+01 -4.0239422E+01
 -4.0172421E+01 -4.0105551E+01 -4.0038810E+01 -3.9972199E+01
 -3.9905717E+01 -3.9839365E+01 -3.9773141E+01 -3.9707045E+01
 -3.9641077E+01 -3.9575237E+01 -3.9509525E+01 -3.9443940E+01
 -3.9378482E+01 -3.9313151E+01 -3.9247946E+01 -3.9182867E+01
 -3.9117914E+01 -3.9053087E+01 -3.8988384E+01 -3.8923808E+01
 -3.8859355E+01 -3.8795027E+01 -3.8730824E+01 -3.8666744E+01
 -3.8602788E+01 -3.8538956E+01 -3.8475246E+01 -3.8411659E+01
 -3.8348195E+01 -3.8284853E+01 -3.8221634E+01 -3.8158535E+01
 -3.8095559E+01 -3.8032703E+01 -3.7969970E+01 -3.7907356E+01
 -3.7844862E+01 -3.7782489E+01 -3.7720236E+01 -3.7658102E+01
 -3.7596089E+01 -3.7534193E+01 -3.7472417E+01 -3.7410760E+01
 -3.7349220E+01 -3.7287799E+01 -3.7226496E+01 -3.7165310E+01
 -3.7104242E+01 -3.7043290E+01 -3.6982455E+01 -3.6921737E+01
 -3.6861135E+01 -3.6800649E+01 -3.6740279E+01 -3.6680024E+01
 -3.6619885E+01 -3.6559861E+01 -3.6499951E+01 -3.6440156E+01
 -3.6380475E+01 -3.6320908E+01 -3.6261455E+01 -3.6202115E+01
 -3.6142889E+01 -3.6083776E+01 -3.6024775E+01 -3.5965887E+01
 -3.5907111E+01 -3.5848448E+01 -3.5789895E+01 -3.5731455E+01
 -3.5673126E+01 -3.5614908E+01 -3.5556800E+01 -3.5498804E+01
 -3.5440918E+01 -3.5383142E+01 -3.5325475E+01 -3.5267918E+01
 -3.5210471E+01 -3.5153132E+01 -3.5095903E+01 -3.5038783E+01
 -3.4981770E+01 -3.4924866E+01 -3.4868070E+01 -3.4811382E+01
 -3.4754801E+01 -3.4698327E+01 -3.4641961E+01 -3.4585701E+01
 -3.4529548E+01 -3.4473501E+01 -3.4417560E+01 -3.4361726E+01
 -3.4305996E+01 -3.4250372E+01 -3.4194854E+01 -3.4139440E+01
 -3.4084131E+01 -3.4028927E+01 -3.3973826E+01 -3.3918830E+01
 -3.3863938E+01 -3.3809150E+01 -3.3754464E+01 -3.3699882E+01
 -3.3645403E+01 -3.3591027E+01 -3.3536753E+01 -3.3482582E+01
 -3.3428512E+01 -3.3374544E+01 -3.3320678E+01 -3.3266913E+01
 -3.3213250E+01 -3.3159687E+01 -3.3106226E+01 -3.3052864E+01
 -3.2999603E+01 -3.2946443E+01 -3.2893382E+01 -3.2840420E+01
 -3.2787558E+01 -3.2734796E+01 -3.2682132E+01 -3.2629568E+01
 -3.2577101E+01 -3.2524733E+01 -3.2472464E+01 -3.2420292E+01
 -3.2368219E+01 -3.2316242E+01 -3.2264363E+01 -3.2212582E+01
 -3.2160897E+01 -3.2109308E+01 -3.2057817E+01 -3.2006422E+01
 -3.1955123E+01 -3.1903919E+01 -3.1852811E+01 -3.1801799E+01
 -3.1750883E+01 -3.1700061E+01 -3.1649334E+01 -3.1598702E+01
 -3.1548164E+01 -3.1497721E+01 -3.1447372E+01 -3.1397116E+01
 -3.1346954E+01 -3.1296886E+01 -3.1246911E+01 -3.1197029E+01
 -3.1147240E+01 -3.1097543E+01 -3.1047939E+01 -3.0998428E+01
 -3.0949008E+01 -3.0899681E+01 -3.0850445E+01 -3.0801300E+01
 -3.0752247E+01 -3.0703285E+01 -3.0654414E+01 -3.0605633E+01
 -3.0556943E+01 -3.0508344E+01 -3.0459835E+01 -3.0411416E+01
 -3.0363086E+01 -3.0314846E+01 -3.0266695E+01 -3.0218633E+01
 -3.0170661E+01 -3.0122777E+01 -3.0074983E+01 -3.0027276E+01
 -2.9979658E+01 -2.9932128E+01 -2.9884685E+01 -2.9837331E+01
 -2.9790064E+01 -2.9742884E+01 -2.9695792E+01 -2.9648786E+01
 -2.9601867E+01 -2.9555035E+01 -2.9508289E+01 -2.9461630E+01
 -2.9415056E+01 -2.9368568E+01 -2.9322167E+01 -2.9275850E+01
 -2.9229619E+01 -2.9183473E+01 -2.9137412E+01 -2.9091436E+01
 -2.9045544E+01 -2.8999737E+01 -2.8954014E+01 -2.8908376E+01
 -2.8862821E+01 -2.8817349E+01 -2.8771962E+01 -2.8726658E+01
 -2.8681436E+01 -2.8636298E+01 -2.8591244E+01 -2.8546271E+01
 -2.8501381E+01 -2.8456574E+01 -2.8411848E+01 -2.8367204E+01
 -2.8322643E+01 -2.8278163E+01 -2.8233764E+01 -2.8189447E+01
 -2.8145211E+01 -2.8101056E+01 -2.8056982E+01 -2.8012988E+01
 -2.7969075E+01 -2.7925242E+01 -2.7881489E+01 -2.7837816E+01
 -2.7794223E+01 -2.7750710E+01 -2.7707276E+01 -2.7663921E+01
 -2.7620645E+01 -2.7577449E+01 -2.7534331E+01 -2.7491291E+01
 -2.7448331E+01 -2.7405449E+01 -2.7362645E+01 -2.7319918E+01
 -2.7277269E+01 -2.7234698E+01 -2.7192206E+01 -2.7149789E+01
 -2.7107450E+01 -2.7065189E+01 -2.7023003E+01 -2.6980895E+01
 -2.6938864E+01 -2.6896908E+01 -2.6855029E+01 -2.6813226E+01
 -2.6771498E+01 -2.6729847E+01 -2.6688272E+01 -2.6646771E+01
 -2.6605346E+01 -2.6563995E+01 -2.6522720E+01 -2.6481520E+01
 -2.6440394E+01 -2.6399343E+01 -2.6358366E+01 -2.6317463E+01
 -2.6276635E+01 -2.6235880E+01 -2.6195199E+01 -2.6154592E+01
 -2.6114057E+01 -2.6073597E+01 -2.6033210E+01 -2.5992895E+01
 -2.5952653E+01 -2.5912484E+01 -2.5872387E+01 -2.5832363E+01
 -2.5792410E+01 -2.5752530E+01 -2.5712723E+01 -2.5672986E+01
 -2.5633322E+01 -2.5593728E+01 -2.5554206E+01 -2.5514756E+01
 -2.5475376E+01 -2.5436067E+01 -2.5396829E+01 -2.5357661E+01
 -2.5318565E+01 -2.5279538E+01 -2.5240581E+01 -2.5201695E+01
 -2.5162878E+01 -2.5124132E+01 -2.5085454E+01 -2.5046846E+01
 -2.5008308E+01 -2.4969838E+01 -2.4931438E+01 -2.4893106E+01
 -2.4854843E+01 -2.4816650E+01 -2.4778524E+01 -2.4740466E+01
 -2.4702477E+01 -2.4664556E+01 -2.4626703E+01 -2.4588917E+01
 -2.4551199E+01 -2.4513549E+01 -2.4475966E+01 -2.4438450E+01
 -2.4401001E+01 -2.4363620E+01 -2.4326305E+01 -2.4289056E+01
 -2.4251874E+01 -2.4214759E+01 -2.4177710E+01 -2.4140726E+01
 -2.4103809E+01 -2.4066958E+01 -2.4030173E+01 -2.3993453E+01
 -2.3956798E+01 -2.3920209E+01 -2.3883685E+01 -2.3847226E+01
 -2.3810831E+01 -2.3774502E+01 -2.3738237E+01 -2.3702038E+01
 -2.3665902E+01 -2.3629830E+01 -2.3593823E+01 -2.3557880E+01
 -2.3522000E+01 -2.3486184E+01 -2.3450432E+01 -2.3414744E+01
 -2.3379119E+01 -2.3343556E+01 -2.3308057E+01 -2.3272621E+01
 -2.3237248E+01 -2.3201937E+01 -2.3166689E+01 -2.3131504E+01
 -2.3096381E+01 -2.3061320E+01 -2.3026322E+01 -2.2991384E+01
 -2.2956509E+01 -2.2921696E+01 -2.2886944E+01 -2.2852254E+01
 -2.2817625E+01 -2.2783057E+01 -2.2748550E+01 -2.2714105E+01
 -2.2679720E+01 -2.2645396E+01 -2.2611132E+01 -2.2576929E+01
 -2.2542786E+01 -2.2508703E+01 -2.2474681E+01 -2.2440719E+01
 -2.2406816E+01 -2.2372973E+01 -2.2339190E+01 -2.2305466E+01
 -2.2271801E+01 -2.2238196E+01 -2.2204650E+01 -2.2171163E+01
 -2.2137735E+01 -2.2104366E+01 -2.2071056E+01 -2.2037804E+01
 -2.2004610E+01 -2.1971474E+01 -2.1938397E+01 -2.1905378E+01
 -2.1872417E+01 -2.1839514E+01 -2.1806669E+01 -2.1773881E+01
 -2.1741150E+01 -2.1708477E+01 -2.1675862E+01 -2.1643303E+01
 -2.1610802E+01 -2.1578357E+01 -2.1545969E+01 -2.1513638E+01
 -2.1481364E+01 -2.1449146E+01 -2.1416984E+01 -2.1384878E+01
 -2.1352829E+01 -2.1320836E+01 -2.1288899E+01 -2.1257018E+01
 -2.1225191E+01 -2.1193421E+01 -2.1161706E+01 -2.1130047E+01
 -2.1098443E+01 -2.1066893E+01 -2.1035399E+01 -2.1003960E+01
 -2.0972576E+01 -2.0941247E+01 -2.0909972E+01 -2.0878751E+01
 -2.0847584E+01 -2.0816473E+01 -2.0785415E+01 -2.0754411E+01
 -2.0723462E+01 -2.0692565E+01 -2.0661723E+01 -2.0630935E+01
 -2.0600200E+01 -2.0569518E+01 -2.0538890E+01 -2.0508314E+01
 -2.0477792E+01 -2.0447323E+01 -2.0416907E+01 -2.0386544E+01
 -2.0356232E+01 -2.0325974E+01 -2.0295769E+01 -2.0265615E+01
 -2.0235514E+01 -2.0205465E+01 -2.0175468E+01 -2.0145523E+01
 -2.0115630E+01 -2.0085788E+01 -2.0055998E+01 -2.0026260E+01
 -1.9996574E+01 -1.9966938E+01 -1.9937354E+01 -1.9907820E+01
 -1.9878338E+01 -1.9848907E+01 -1.9819526E+01 -1.9790197E+01
 -1.9760918E+01 -1.9731689E+01 -1.9702511E+01 -1.9673384E+01
 -1.9644306E+01 -1.9615279E+01 -1.9586301E+01 -1.9557374E+01
 -1.9528496E+01 -1.9499669E+01 -1.9470890E+01 -1.9442162E+01
 -1.9413482E+01 -1.9384852E+01 -1.9356272E+01 -1.9327740E+01
 -1.9299257E+01 -1.9270824E+01 -1.9242439E+01 -1.9214103E+01
 -1.9185816E+01 -1.9157577E+01 -1.9129388E+01 -1.9101245E+01
 -1.9073152E+01 -1.9045106E+01 -1.9017110E+01 -1.8989160E+01
 -1.8961259E+01 -1.8933405E+01 -1.8905600E+01 -1.8877841E+01
 -1.8850131E+01 -1.8822468E+01 -1.8794852E+01 -1.8767284E+01
 -1.8739762E+01 -1.8712288E+01 -1.8684860E+01 -1.8657480E+01
 -1.8630146E+01 -1.8602860E+01 -1.8575619E+01 -1.8548426E+01
 -1.8521278E+01 -1.8494177E+01 -1.8467123E+01 -1.8440114E+01
 -1.8413151E+01 -1.8386235E+01 -1.8359364E+01 -1.8332540E+01
 -1.8305760E+01 -1.8279026E+01 -1.8252339E+01 -1.8225696E+01
 -1.8199099E+01 -1.8172547E+01 -1.8146041E+01 -1.8119579E+01
 -1.8093162E+01 -1.8066791E+01 -1.8040464E+01 -1.8014182E+01
 -1.7987945E+01 -1.7961752E+01 -1.7935603E+01 -1.7909499E+01
 -1.7883440E+01 -1.7857424E+01 -1.7831453E+01 -1.7805526E+01
 -1.7779643E+01 -1.7753803E+01 -1.7728007E+01 -1.7702255E+01
 -1.7676548E+01 -1.7650883E+01 -1.7625261E+01 -1.7599684E+01
 -1.7574149E+01 -1.7548658E+01 -1.7523209E+01 -1.7497805E+01
 -1.7472442E+01 -1.7447123E+01 -1.7421846E+01 -1.7396612E+01
 -1.7371421E+01 -1.7346273E+01 -1.7321167E+01 -1.7296103E+01
 -1.7271081E+01 -1.7246102E+01 -1.7221165E+01 -1.7196270E+01
 -1.7171417E+01 -1.7146606E+01 -1.7121836E+01 -1.7097109E+01
 -1.7072423E+01 -1.7047778E+01 -1.7023175E+01 -1.6998614E+01
 -1.6974094E+01 -1.6949615E+01 -1.6925177E+01 -1.6900780E+01
 -1.6876424E+01 -1.6852110E+01 -1.6827836E+01 -1.6803603E+01
 -1.6779410E+01 -1.6755259E+01 -1.6731148E+01 -1.6707077E+01
 -1.6683047E+01 -1.6659057E+01 -1.6635107E+01 -1.6611197E+01
 -1.6587328E+01 -1.6563498E+01 -1.6539709E+01 -1.6515959E+01
 -1.6492249E+01 -1.6468579E+01 -1.6444949E+01 -1.6421357E+01
 -1.6397806E+01 -1.6374293E+01 -1.6350821E+01 -1.6327387E+01
 -1.6303992E+01 -1.6280637E+01 -1.6257320E+01 -1.6234043E+01
 -1.6210805E+01 -1.6187605E+01 -1.6164444E+01 -1.6141322E+01
 -1.6118238E+01 -1.6095193E+01 -1.6072186E+01 -1.6049217E+01
 -1.6026287E+01 -1.6003395E+01 -1.5980541E+01 -1.5957725E+01
 -1.5934948E+01 -1.5912208E+01 -1.5889506E+01 -1.5866842E+01
 -1.5844215E+01 -1.5821627E+01 -1.5799075E+01 -1.5776561E+01
 -1.5754085E+01 -1.5731646E+01 -1.5709244E+01 -1.5686879E+01
 -1.5664552E+01 -1.5642262E+01 -1.5620009E+01 -1.5597792E+01
 -1.5575612E+01 -1.5553469E+01 -1.5531364E+01 -1.5509294E+01
 -1.5487262E+01 -1.5465265E+01 -1.5443305E+01 -1.5421382E+01
 -1.5399494E+01 -1.5377643E+01 -1.5355829E+01 -1.5334049E+01
 -1.5312307E+01 -1.5290600E+01 -1.5268929E+01 -1.5247295E+01
 -1.5225695E+01 -1.5204131E+01 -1.5182603E+01 -1.5161111E+01
 -1.5139654E+01 -1.5118232E+01 -1.5096847E+01 -1.5075496E+01
 -1.5054180E+01 -1.5032900E+01 -1.5011654E+01 -1.4990444E+01
 -1.4969268E+01 -1.4948128E+01 -1.4927022E+01 -1.4905951E+01
 -1.4884915E+01 -1.4863913E+01 -1.4842946E+01 -1.4822013E+01
 -1.4801115E+01 -1.4780252E+01 -1.4759422E+01 -1.4738627E+01
 -1.4717866E+01 -1.4697139E+01 -1.4676446E+01 -1.4655787E+01
 -1.4635162E+01 -1.4614571E+01 -1.4594013E+01 -1.4573490E+01
 -1.4553000E+01 -1.4532544E+01 -1.4512121E+01 -1.4491731E+01
 -1.4471375E+01 -1.4451053E+01 -1.4430764E+01 -1.4410508E+01
 -1.4390285E+01 -1.4370095E+01 -1.4349938E+01 -1.4329814E+01
 -1.4309723E+01 -1.4289665E+01 -1.4269640E+01 -1.4249648E+01
 -1.4229688E+01 -1.4209760E+01 -1.4189866E+01 -1.4170004E+01
 -1.4150174E+01 -1.4130377E+01 -1.4110612E+01 -1.4090879E+01
 -1.4071178E+01 -1.4051510E+01 -1.4031873E+01 -1.4012269E+01
 -1.3992696E+01 -1.3973156E+01 -1.3953647E+01 -1.3934170E+01
 -1.3914725E+01 -1.3895311E+01 -1.3875929E+01 -1.3856579E+01
 -1.3837259E+01 -1.3817972E+01 -1.3798715E+01 -1.3779491E+01
 -1.3760297E+01 -1.3741134E+01 -1.3722003E+01 -1.3702903E+01
 -1.3683833E+01 -1.3664795E+01 -1.3645787E+01 -1.3626811E+01
 -1.3607865E+01 -1.3588950E+01 -1.3570065E+01 -1.3551212E+01
 -1.3532388E+01 -1.3513595E+01 -1.3494833E+01 -1.3476101E+01
 -1.3457399E+01 -1.3438728E+01 -1.3420087E+01 -1.3401476E+01
 -1.3382895E+01 -1.3364344E+01 -1.3345823E+01 -1.3327332E+01
 -1.3308872E+01 -1.3290440E+01 -1.3272038E+01 -1.3253667E+01
 -1.3235325E+01 -1.3217012E+01 -1.3198730E+01 -1.3180476E+01
 -1.3162252E+01 -1.3144058E+01 -1.3125893E+01 -1.3107756E+01
 -1.3089650E+01 -1.3071572E+01 -1.3053524E+01 -1.3035504E+01
 -1.3017514E+01 -1.2999553E+01 -1.2981620E+01 -1.2963716E+01
 -1.2945842E+01 -1.2927995E+01 -1.2910178E+01 -1.2892390E+01
 -1.2874629E+01 -1.2856898E+01 -1.2839195E+01 -1.2821520E+01
 -1.2803873E+01 -1.2786256E+01 -1.2768666E+01 -1.2751104E+01
 -1.2733571E+01 -1.2716066E+01 -1.2698589E+01 -1.2681140E+01
 -1.2663719E+01 -1.2646325E+01 -1.2628960E+01 -1.2611622E+01
 -1.2594313E+01 -1.2577031E+01 -1.2559776E+01 -1.2542549E+01
 -1.2525350E+01 -1.2508178E+01 -1.2491034E+01 -1.2473918E+01
 -1.2456828E+01 -1.2439766E+01 -1.2422731E+01 -1.2405723E+01
 -1.2388742E+01 -1.2371789E+01 -1.2354863E+01 -1.2337963E+01
 -1.2321091E+01 -1.2304245E+01 -1.2287426E+01 -1.2270635E+01
 -1.2253870E+01 -1.2237131E+01 -1.2220420E+01 -1.2203735E+01
 -1.2187076E+01 -1.2170444E+01 -1.2153839E+01 -1.2137259E+01
 -1.2120707E+01 -1.2104180E+01 -1.2087680E+01 -1.2071207E+01
 -1.2054759E+01 -1.2038337E+01 -1.2021942E+01 -1.2005573E+01
 -1.1989229E+01 -1.1972912E+01 -1.1956620E+01 -1.1940355E+01
 -1.1924115E+01 -1.1907901E+01 -1.1891712E+01 -1.1875550E+01
 -1.1859413E+01 -1.1843301E+01 -1.1827215E+01 -1.1811155E+01
 -1.1795120E+01 -1.1779110E+01 -1.1763125E+01 -1.1747166E+01
 -1.1731232E+01 -1.1715324E+01 -1.1699441E+01 -1.1683583E+01
 -1.1667749E+01 -1.1651941E+01 -1.1636158E+01 -1.1620400E+01
 -1.1604666E+01 -1.1588958E+01 -1.1573274E+01 -1.1557615E+01
 -1.1541981E+01 -1.1526371E+01 -1.1510786E+01 -1.1495226E+01
 -1.1479690E+01 -1.1464179E+01 -1.1448692E+01 -1.1433230E+01
 -1.1417792E+01 -1.1402378E+01 -1.1386988E+01 -1.1371622E+01
 -1.1356281E+01 -1.1340965E+01 -1.1325671E+01 -1.1310403E+01
 -1.1295158E+01 -1.1279937E+01 -1.1264740E+01 -1.1249567E+01
 -1.1234418E+01 -1.1219292E+01 -1.1204191E+01 -1.1189113E+01
 -1.1174058E+01 -1.1159027E+01 -1.1144021E+01 -1.1129037E+01
 -1.1114077E+01 -1.1099141E+01 -1.1084227E+01 -1.1069337E+01
 -1.1054471E+01 -1.1039627E+01 -1.1024808E+01 -1.1010011E+01
 -1.0995237E+01 -1.0980487E+01 -1.0965760E+01 -1.0951055E+01
 -1.0936374E+01 -1.0921715E+01 -1.0907080E+01 -1.0892468E+01
 -1.0877878E+01 -1.0863311E+01 -1.0848767E+01 -1.0834245E+01
 -1.0819746E+01 -1.0805270E+01 -1.0790816E+01 -1.0776386E+01
 -1.0761977E+01 -1.0747591E+01 -1.0733227E+01 -1.0718886E+01
 -1.0704567E+01 -1.0690271E+01 -1.0675996E+01 -1.0661744E+01
 -1.0647514E+01 -1.0633307E+01 -1.0619121E+01 -1.0604957E+01
 -1.0590816E+01 -1.0576697E+01 -1.0562599E+01 -1.0548523E+01
 -1.0534469E+01 -1.0520438E+01 -1.0506428E+01 -1.0492439E+01
 -1.0478472E+01 -1.0464527E+01 -1.0450604E+01 -1.0436702E+01
 -1.0422822E+01 -1.0408964E+01 -1.0395126E+01 -1.0381311E+01
 -1.0367516E+01 -1.0353744E+01 -1.0339992E+01 -1.0326262E+01
 -1.0312553E+01 -1.0298865E+01 -1.0285199E+01 -1.0271553E+01
 -1.0257929E+01 -1.0244326E+01 -1.0230744E+01 -1.0217183E+01
 -1.0203643E+01 -1.0190123E+01 -1.0176625E+01 -1.0163147E+01
 -1.0149691E+01 -1.0136255E+01 -1.0122840E+01 -1.0109445E+01
 -1.0096072E+01 -1.0082719E+01 -1.0069386E+01 -1.0056074E+01
 -1.0042783E+01 -1.0029512E+01 -1.0016261E+01 -1.0003031E+01
 -9.9898215E+00 -9.9766320E+00 -9.9634628E+00 -9.9503145E+00
 -9.9371858E+00 -9.9240773E+00 -9.9109890E+00 -9.8979210E+00
 -9.8848733E+00 -9.8718458E+00 -9.8588378E+00 -9.8458500E+00
 -9.8328825E+00 -9.8199345E+00 -9.8070060E+00 -9.7940978E+00
 -9.7812098E+00 -9.7683413E+00 -9.7554923E+00 -9.7426628E+00
 -9.7298535E+00 -9.7170638E+00 -9.7042935E+00 -9.6915428E+00
 -9.6788115E+00 -9.6661005E+00 -9.6534083E+00 -9.6407355E+00
 -9.6280823E+00 -9.6154485E+00 -9.6028335E+00 -9.5902388E+00
 -9.5776628E+00 -9.5651055E+00 -9.5525685E+00 -9.5400495E+00
 -9.5275508E+00 -9.5150708E+00 -9.5026095E+00 -9.4901670E+00
 -9.4777440E+00 -9.4653405E+00 -9.4529550E+00 -9.4405890E+00
 -9.4282418E+00 -9.4159133E+00 -9.4036035E+00 -9.3913125E+00
 -9.3790403E+00 -9.3667868E+00 -9.3545520E+00 -9.3423353E+00
 -9.3301380E+00 -9.3179588E+00 -9.3057983E+00 -9.2936565E+00
 -9.2815328E+00 -9.2694278E+00 -9.2573415E+00 -9.2452733E+00
 -9.2332230E+00 -9.2211915E+00 -9.2091788E+00 -9.1971833E+00
 -9.1852065E+00 -9.1732478E+00 -9.1613078E+00 -9.1493850E+00
 -9.1374810E+00 -9.1255950E+00 -9.1137270E+00 -9.1018763E+00
 -9.0900443E+00 -9.0782303E+00 -9.0664343E+00 -9.0546555E+00
 -9.0428948E+00 -9.0311520E+00 -9.0194273E+00 -9.0077198E+00
 -8.9960303E+00 -8.9843588E+00 -8.9727045E+00 -8.9610683E+00
 -8.9494493E+00 -8.9378483E+00 -8.9262645E+00 -8.9146980E+00
 -8.9031495E+00 -8.8916175E+00 -8.8801043E+00 -8.8686075E+00
 -8.8571280E+00 -8.8456665E+00 -8.8342223E+00 -8.8227945E+00
 -8.8113848E+00 -8.7999915E+00 -8.7886163E+00 -8.7772575E+00
 -8.7659168E+00 -8.7545925E+00 -8.7432848E+00 -8.7319950E+00
 -8.7207218E+00 -8.7094658E+00 -8.6982263E+00 -8.6870040E+00
 -8.6757983E+00 -8.6646098E+00 -8.6534385E+00 -8.6422830E+00
 -8.6311455E+00 -8.6200238E+00 -8.6089193E+00 -8.5978313E+00
 -8.5867598E+00 -8.5757048E+00 -8.5646670E+00 -8.5536450E+00
 -8.5426403E+00 -8.5316520E+00 -8.5206795E+00 -8.5097243E+00
 -8.4987848E+00 -8.4878625E+00 -8.4769560E+00 -8.4660660E+00
 -8.4551925E+00 -8.4443348E+00 -8.4334935E+00 -8.4226688E+00
 -8.4118605E+00 -8.4010680E+00 -8.3902913E+00 -8.3795310E+00
 -8.3687873E+00 -8.3580593E+00 -8.3473470E+00 -8.3366513E+00
 -8.3259713E+00 -8.3153070E+00 -8.3046585E+00 -8.2940265E+00
 -8.2834103E+00 -8.2728098E+00 -8.2622250E+00 -8.2516560E+00
 -8.2411028E+00 -8.2305653E+00 -8.2200443E+00 -8.2095383E+00
 -8.1990480E+00 -8.1885728E+00 -8.1781140E+00 -8.1676703E+00
 -8.1572423E+00 -8.1468300E+00 -8.1364335E+00 -8.1260520E+00
 -8.1156855E+00 -8.1053355E+00 -8.0950005E+00 -8.0846805E+00
 -8.0743763E+00 -8.0640870E+00 -8.0538128E+00 -8.0435543E+00
 -8.0333115E+00 -8.0230830E+00 -8.0128703E+00 -8.0026725E+00
 -7.9924898E+00 -7.9823228E+00 -7.9721700E+00 -7.9620330E+00
 -7.9519103E+00 -7.9418033E+00 -7.9317105E+00 -7.9216335E+00
 -7.9115708E+00 -7.9015238E+00 -7.8914910E+00 -7.8814733E+00
 -7.8714705E+00 -7.8614820E+00 -7.8515085E+00 -7.8415500E+00
 -7.8316065E+00 -7.8216773E+00 -7.8117630E+00 -7.8018630E+00
 -7.7919780E+00 -7.7821073E+00 -7.7722515E+00 -7.7624100E+00
 -7.7525828E+00 -7.7427705E+00 -7.7329725E+00 -7.7231895E+00
 -7.7134208E+00 -7.7036655E+00 -7.6939260E+00 -7.6842000E+00
 -7.6744883E+00 -7.6647915E+00 -7.6551083E+00 -7.6454400E+00
 -7.6357853E+00 -7.6261455E+00 -7.6165193E+00 -7.6069080E+00
 -7.5973103E+00 -7.5877268E+00 -7.5781575E+00 -7.5686018E+00
 -7.5590603E+00 -7.5495330E+00 -7.5400200E+00 -7.5305213E+00
 -7.5210360E+00 -7.5115643E+00 -7.5021068E+00 -7.4926634E+00
 -7.4832337E+00 -7.4738178E+00 -7.4644158E+00 -7.4550276E+00
 -7.4456531E+00 -7.4362925E+00 -7.4269455E+00 -7.4176122E+00
 -7.4082926E+00 -7.3989867E+00 -7.3896944E+00 -7.3804157E+00
 -7.3711507E+00 -7.3618991E+00 -7.3526612E+00 -7.3434367E+00
 -7.3342258E+00 -7.3250283E+00 -7.3158443E+00 -7.3066736E+00
 -7.2975164E+00 -7.2883727E+00 -7.2792422E+00 -7.2701252E+00
 -7.2610214E+00 -7.2519308E+00 -7.2428537E+00 -7.2337897E+00
 -7.2247390E+00 -7.2157015E+00 -7.2066772E+00 -7.1976660E+00
 -7.1886680E+00 -7.1796831E+00 -7.1707113E+00 -7.1617526E+00
 -7.1528069E+00 -7.1438743E+00 -7.1349546E+00 -7.1260480E+00
 -7.1171543E+00 -7.1082737E+00 -7.0994058E+00 -7.0905509E+00
 -7.0817090E+00 -7.0728798E+00 -7.0640635E+00 -7.0552600E+00
 -7.0464693E+00 -7.0376914E+00 -7.0289263E+00 -7.0201739E+00
 -7.0114341E+00 -7.0027071E+00 -6.9939928E+00 -6.9852911E+00
 -6.9766020E+00 -6.9679255E+00 -6.9592616E+00 -6.9506103E+00
 -6.9419716E+00 -6.9333453E+00 -6.9247316E+00 -6.9161303E+00
 -6.9075415E+00 -6.8989652E+00 -6.8904012E+00 -6.8818497E+00
 -6.8733105E+00 -6.8647838E+00 -6.8562692E+00 -6.8477672E+00
 -6.8392773E+00 -6.8307997E+00 -6.8223344E+00 -6.8138813E+00
 -6.8054405E+00 -6.7970118E+00 -6.7885953E+00 -6.7801910E+00
 -6.7717988E+00 -6.7634188E+00 -6.7550508E+00 -6.7466949E+00
 -6.7383510E+00 -6.7300192E+00 -6.7216994E+00 -6.7133916E+00
 -6.7050958E+00 -6.6968120E+00 -6.6885401E+00 -6.6802800E+00
 -6.6720319E+00 -6.6637957E+00 -6.6555713E+00 -6.6473588E+00
 -6.6391581E+00 -6.6309692E+00 -6.6227921E+00 -6.6146267E+00
 -6.6064730E+00 -6.5983312E+00 -6.5902010E+00 -6.5820824E+00
 -6.5739756E+00 -6.5658804E+00 -6.5577968E+00 -6.5497249E+00
 -6.5416645E+00 -6.5336157E+00 -6.5255785E+00 -6.5175527E+00
 -6.5095385E+00 -6.5015358E+00 -6.4935446E+00 -6.4855648E+00
 -6.4775965E+00 -6.4696396E+00 -6.4616940E+00 -6.4537599E+00
 -6.4458371E+00 -6.4379257E+00 -6.4300256E+00 -6.4221368E+00
 -6.4142593E+00 -6.4063931E+00 -6.3985381E+00 -6.3906944E+00
 -6.3828618E+00 -6.3750404E+00 -6.3672303E+00 -6.3594313E+00
 -6.3516434E+00 -6.3438668E+00 -6.3361011E+00 -6.3283466E+00
 -6.3206031E+00 -6.3128707E+00 -6.3051494E+00 -6.2974390E+00
 -6.2897396E+00 -6.2820512E+00 -6.2743738E+00 -6.2667073E+00
 -6.2590517E+00 -6.2514071E+00 -6.2437734E+00 -6.2361505E+00
 -6.2285385E+00 -6.2209373E+00 -6.2133470E+00 -6.2057674E+00
 -6.1981986E+00 -6.1906406E+00 -6.1830933E+00 -6.1755568E+00
 -6.1680310E+00 -6.1605158E+00 -6.1530114E+00 -6.1455176E+00
 -6.1380345E+00 -6.1305620E+00 -6.1231001E+00 -6.1156489E+00
 -6.1082081E+00 -6.1007780E+00 -6.0933584E+00 -6.0859493E+00
 -6.0785507E+00 -6.0711626E+00 -6.0637850E+00 -6.0564179E+00
 -6.0490611E+00 -6.0417149E+00 -6.0343790E+00 -6.0270534E+00
 -6.0197383E+00 -6.0124336E+00 -6.0051392E+00 -5.9978550E+00
 -5.9905812E+00 -5.9833177E+00 -5.9760644E+00 -5.9688215E+00
 -5.9615888E+00 -5.9543663E+00 -5.9471539E+00 -5.9399518E+00
 -5.9327598E+00 -5.9255780E+00 -5.9184064E+00 -5.9112449E+00
 -5.9040935E+00 -5.8969521E+00 -5.8898209E+00 -5.8826997E+00
 -5.8755885E+00 -5.8684874E+00 -5.8613963E+00 -5.8543151E+00
 -5.8472441E+00 -5.8401829E+00 -5.8331316E+00 -5.8260903E+00
 -5.8190589E+00 -5.8120374E+00 -5.8050258E+00 -5.7980241E+00
 -5.7910322E+00 -5.7840502E+00 -5.7770780E+00 -5.7701155E+00
 -5.7631628E+00 -5.7562200E+00 -5.7492869E+00 -5.7423635E+00
 -5.7354498E+00 -5.7285459E+00 -5.7216517E+00 -5.7147671E+00
 -5.7078922E+00 -5.7010269E+00 -5.6941713E+00 -5.6873253E+00
 -5.6804888E+00 -5.6736620E+00 -5.6668448E+00 -5.6600371E+00
 -5.6532389E+00 -5.6464503E+00 -5.6396711E+00 -5.6329015E+00
 -5.6261414E+00 -5.6193907E+00 -5.6126494E+00 -5.6059176E+00
 H_+     O_2-
  2.3785000E+06  2.3675510E+06  2.3566525E+06  2.3458040E+06
  2.3350055E+06  2.3242568E+06  2.3135575E+06  2.3029075E+06
  2.2923065E+06  2.2817542E+06  2.2712508E+06  2.2607955E+06
  2.2503882E+06  2.2400290E+06  2.2297175E+06  2.2194532E+06
  2.2092365E+06  2.1990668E+06  2.1889438E+06  2.1788672E+06
  2.1688372E+06  2.1588535E+06  2.1489155E+06  2.1390235E+06
  2.1291768E+06  2.1193755E+06  2.1096195E+06  2.0999080E+06
  2.0902416E+06  2.0806195E+06  2.0710418E+06  2.0615081E+06
  2.0520184E+06  2.0425722E+06  2.0331696E+06  2.0238104E+06
  2.0144941E+06  2.0052208E+06  1.9959901E+06  1.9868020E+06
  1.9776561E+06  1.9685522E+06  1.9594904E+06  1.9504702E+06
  1.9414916E+06  1.9325544E+06  1.9236582E+06  1.9148030E+06
  1.9059885E+06  1.8972146E+06  1.8884812E+06  1.8797879E+06
  1.8711346E+06  1.8625212E+06  1.8539475E+06  1.8454131E+06
  1.8369181E+06  1.8284622E+06  1.8200452E+06  1.8116670E+06
  1.8033274E+06  1.7950260E+06  1.7867630E+06  1.7785380E+06
  1.7703508E+06  1.7622012E+06  1.7540894E+06  1.7460148E+06
  1.7379772E+06  1.7299768E+06  1.7220131E+06  1.7140862E+06
  1.7061958E+06  1.6983416E+06  1.6905235E+06  1.6827415E+06
  1.6749954E+06  1.6672849E+06  1.6596098E+06  1.6519701E+06
  1.6443655E+06  1.6367960E+06  1.6292614E+06  1.6217614E+06
  1.6142959E+06  1.6068648E+06  1.5994679E+06  1.5921050E+06
  1.5847760E+06  1.5774808E+06  1.5702191E+06  1.5629909E+06
  1.5557960E+06  1.5486341E+06  1.5415054E+06  1.5344092E+06
  1.5273459E+06  1.5203151E+06  1.5133166E+06  1.5063502E+06
  1.4994161E+06  1.4925139E+06  1.4856432E+06  1.4788044E+06
  1.4719970E+06  1.4652210E+06  1.4584761E+06  1.4517622E+06
  1.4450794E+06  1.4384271E+06  1.4318056E+06  1.4252146E+06
  1.4186539E+06  1.4121234E+06  1.4056229E+06  1.3991524E+06
  1.3927116E+06  1.3863006E+06  1.3799190E+06  1.3735668E+06
  1.3672439E+06  1.3609500E+06  1.3546851E+06  1.3484490E+06
  1.3422418E+06  1.3360630E+06  1.3299126E+06  1.3237906E+06
  1.3176968E+06  1.3116310E+06  1.3055931E+06  1.2995831E+06
  1.2936008E+06  1.2876459E+06  1.2817185E+06  1.2758182E+06
  1.2699452E+06  1.2640994E+06  1.2582802E+06  1.2524880E+06
  1.2467224E+06  1.2409834E+06  1.2352708E+06  1.2295844E+06
  1.2239242E+06  1.2182901E+06  1.2126820E+06  1.2070996E+06
  1.2015429E+06  1.1960119E+06  1.1905062E+06  1.1850260E+06
  1.1795709E+06  1.1741410E+06  1.1687360E+06  1.1633560E+06
  1.1580006E+06  1.1526700E+06  1.1473639E+06  1.1420822E+06
  1.1368249E+06  1.1315918E+06  1.1263826E+06  1.1211975E+06
  1.1160364E+06  1.1108989E+06  1.1057850E+06  1.1006948E+06
  1.0956279E+06  1.0905844E+06  1.0855641E+06  1.0805669E+06
  1.0755928E+06  1.0706414E+06  1.0657129E+06  1.0608071E+06
  1.0559239E+06  1.0510631E+06  1.0462248E+06  1.0414086E+06
  1.0366148E+06  1.0318429E+06  1.0270930E+06  1.0223649E+06
  1.0176587E+06  1.0129741E+06  1.0083110E+06  1.0036694E+06
  9.9904925E+05  9.9445031E+05  9.8987250E+05  9.8531588E+05
  9.8078012E+05  9.7626525E+05  9.7177125E+05  9.6729788E+05
  9.6284506E+05  9.5841281E+05  9.5400094E+05  9.4960938E+05
  9.4523800E+05  9.4088675E+05  9.3655556E+05  9.3224431E+05
  9.2795288E+05  9.2368125E+05  9.1942925E+05  9.1519681E+05
  9.1098388E+05  9.0679038E+05  9.0261612E+05  8.9846106E+05
  8.9432519E+05  8.9020831E+05  8.8611038E+05  8.8203138E+05
  8.7797112E+05  8.7392950E+05  8.6990656E+05  8.6590212E+05
  8.6191606E+05  8.5794838E+05  8.5399900E+05  8.5006775E+05
  8.4615462E+05  8.4225950E+05  8.3838231E+05  8.3452300E+05
  8.3068144E+05  8.2685750E+05  8.2305125E+05  8.1926250E+05
  8.1549112E+05  8.1173719E+05  8.0800050E+05  8.0428100E+05
  8.0057869E+05  7.9689338E+05  7.9322500E+05  7.8957356E+05
  7.8593888E+05  7.8232100E+05  7.7871969E+05  7.7513500E+05
  7.7156681E+05  7.6801506E+05  7.6447962E+05  7.6096050E+05
  7.5745756E+05  7.5397075E+05  7.5050000E+05  7.4704519E+05
  7.4360631E+05  7.4018325E+05  7.3677594E+05  7.3338431E+05
  7.3000831E+05  7.2664788E+05  7.2330288E+05  7.1997331E+05
  7.1665900E+05  7.1336000E+05  7.1007619E+05  7.0680750E+05
  7.0355388E+05  7.0031519E+05  6.9709138E+05  6.9388244E+05
  6.9068831E+05  6.8750888E+05  6.8434400E+05  6.8119375E+05
  6.7805800E+05  6.7493669E+05  6.7182975E+05  6.6873712E+05
  6.6565869E+05  6.6259450E+05  6.5954438E+05  6.5650825E+05
  6.5348612E+05  6.5047794E+05  6.4748356E+05  6.4450300E+05
  6.4153612E+05  6.3858300E+05  6.3564338E+05  6.3271731E+05
  6.2980469E+05  6.2690550E+05  6.2401969E+05  6.2114712E+05
  6.1828775E+05  6.1544162E+05  6.1260850E+05  6.0978850E+05
  6.0698144E+05  6.0418731E+05  6.0140606E+05  5.9863762E+05
  5.9588188E+05  5.9313888E+05  5.9040844E+05  5.8769062E+05
  5.8498525E+05  5.8229244E+05  5.7961194E+05  5.7694381E+05
  5.7428794E+05  5.7164431E+05  5.6901288E+05  5.6639350E+05
  5.6378625E+05  5.6119094E+05  5.5860762E+05  5.5603612E+05
  5.5347656E+05  5.5092875E+05  5.4839262E+05  5.4586819E+05
  5.4335538E+05  5.4085412E+05  5.3836444E+05  5.3588619E+05
  5.3341931E+05  5.3096381E+05  5.2851962E+05  5.2608669E+05
  5.2366494E+05  5.2125434E+05  5.1885484E+05  5.1646641E+05
  5.1408894E+05  5.1172244E+05  5.0936681E+05  5.0702203E+05
  5.0468806E+05  5.0236481E+05  5.0005228E+05  4.9775038E+05
  4.9545906E+05  4.9317831E+05  4.9090806E+05  4.8864825E+05
  4.8639884E+05  4.8415981E+05  4.8193106E+05  4.7971259E+05
  4.7750431E+05  4.7530622E+05  4.7311822E+05  4.7094031E+05
  4.6877244E+05  4.6661453E+05  4.6446656E+05  4.6232847E+05
  4.6020022E+05  4.5808178E+05  4.5597306E+05  4.5387409E+05
  4.5178478E+05  4.4970506E+05  4.4763494E+05  4.4557431E+05
  4.4352319E+05  4.4148153E+05  4.3944925E+05  4.3742631E+05
  4.3541272E+05  4.3340838E+05  4.3141325E+05  4.2942731E+05
  4.2745053E+05  4.2548284E+05  4.2352422E+05  4.2157459E+05
  4.1963394E+05  4.1770225E+05  4.1577944E+05  4.1386547E+05
  4.1196031E+05  4.1006394E+05  4.0817628E+05  4.0629731E+05
  4.0442700E+05  4.0256531E+05  4.0071219E+05  3.9886756E+05
  3.9703144E+05  3.9520378E+05  3.9338456E+05  3.9157369E+05
  3.8977112E+05  3.8797691E+05  3.8619091E+05  3.8441316E+05
  3.8264356E+05  3.8088216E+05  3.7912881E+05  3.7738356E+05
  3.7564634E+05  3.7391716E+05  3.7219588E+05  3.7048256E+05
  3.6877709E+05  3.6707950E+05  3.6538972E+05  3.6370772E+05
  3.6203344E+05  3.6036691E+05  3.5870803E+05  3.5705678E+05
  3.5541312E+05  3.5377706E+05  3.5214850E+05  3.5052744E+05
  3.4891388E+05  3.4730769E+05  3.4570894E+05  3.4411753E+05
  3.4253344E+05  3.4095666E+05  3.3938712E+05  3.3782481E+05
  3.3626969E+05  3.3472175E+05  3.3318094E+05  3.3164719E+05
  3.3012050E+05  3.2860088E+05  3.2708819E+05  3.2558253E+05
  3.2408375E+05  3.2259191E+05  3.2110691E+05  3.1962875E+05
  3.1815741E+05  3.1669281E+05  3.1523497E+05  3.1378384E+05
  3.1233944E+05  3.1090162E+05  3.0947044E+05  3.0804584E+05
  3.0662781E+05  3.0521631E+05  3.0381131E+05  3.0241278E+05
  3.0102069E+05  2.9963497E+05  2.9825566E+05  2.9688269E+05
  2.9551606E+05  2.9415569E+05  2.9280159E+05  2.9145375E+05
  2.9011209E+05  2.8877662E+05  2.8744728E+05  2.8612406E+05
  2.8480694E+05  2.8349591E+05  2.8219088E+05  2.8089188E+05
  2.7959881E+05  2.7831175E+05  2.7703059E+05  2.7575531E+05
  2.7448594E+05  2.7322241E+05  2.7196469E+05  2.7071272E+05
  2.6946656E+05  2.6822612E+05  2.6699138E+05  2.6576234E+05
  2.6453894E+05  2.6332119E+05  2.6210905E+05  2.6090247E+05
  2.5970145E+05  2.5850597E+05  2.5731600E+05  2.5613147E+05
  2.5495242E+05  2.5377880E+05  2.5261058E+05  2.5144772E+05
  2.5029025E+05  2.4913808E+05  2.4799122E+05  2.4684962E+05
  2.4571331E+05  2.4458220E+05  2.4345631E+05  2.4233561E+05
  2.4122006E+05  2.4010966E+05  2.3900436E+05  2.3790414E+05
  2.3680900E+05  2.3571889E+05  2.3463380E+05  2.3355370E+05
  2.3247858E+05  2.3140841E+05  2.3034317E+05  2.2928283E+05
  2.2822736E+05  2.2717677E+05  2.2613100E+05  2.2509005E+05
  2.2405388E+05  2.2302250E+05  2.2199584E+05  2.2097394E+05
  2.1995672E+05  2.1894419E+05  2.1793631E+05  2.1693309E+05
  2.1593448E+05  2.1494047E+05  2.1395103E+05  2.1296614E+05
  2.1198580E+05  2.1100995E+05  2.1003861E+05  2.0907173E+05
  2.0810931E+05  2.0715131E+05  2.0619773E+05  2.0524855E+05
  2.0430372E+05  2.0336325E+05  2.0242709E+05  2.0149527E+05
  2.0056772E+05  1.9964444E+05  1.9872542E+05  1.9781062E+05
  1.9690003E+05  1.9599364E+05  1.9509142E+05  1.9419336E+05
  1.9329942E+05  1.9240961E+05  1.9152388E+05  1.9064223E+05
  1.8976466E+05  1.8889111E+05  1.8802158E+05  1.8715606E+05
  1.8629452E+05  1.8543694E+05  1.8458333E+05  1.8373362E+05
  1.8288784E+05  1.8204595E+05  1.8120794E+05  1.8037378E+05
  1.7954347E+05  1.7871697E+05  1.7789428E+05  1.7707538E+05
  1.7626023E+05  1.7544886E+05  1.7464122E+05  1.7383728E+05
  1.7303706E+05  1.7224052E+05  1.7144764E+05  1.7065841E+05
  1.6987281E+05  1.6909083E+05  1.6831245E+05  1.6753766E+05
  1.6676644E+05  1.6599875E+05  1.6523461E+05  1.6447398E+05
  1.6371686E+05  1.6296322E+05  1.6221305E+05  1.6146633E+05
  1.6072305E+05  1.5998319E+05  1.5924673E+05  1.5851367E+05
  1.5778398E+05  1.5705766E+05  1.5633467E+05  1.5561502E+05
  1.5489867E+05  1.5418562E+05  1.5347586E+05  1.5276936E+05
  1.5206611E+05  1.5136611E+05  1.5066931E+05  1.4997573E+05
  1.4928536E+05  1.4859814E+05  1.4791411E+05  1.4723320E+05
  1.4655544E+05  1.4588081E+05  1.4520927E+05  1.4454083E+05
  1.4387545E+05  1.4321316E+05  1.4255391E+05  1.4189767E+05
  1.4124448E+05  1.4059428E+05  1.3994708E+05  1.3930286E+05
  1.3866161E+05  1.3802331E+05  1.3738794E+05  1.3675550E+05
  1.3612597E+05  1.3549934E+05  1.3487559E+05  1.3425472E+05
  1.3363670E+05  1.3302153E+05  1.3240919E+05  1.3179967E+05
  1.3119295E+05  1.3058903E+05  1.2998789E+05  1.2938952E+05
  1.2879390E+05  1.2820102E+05  1.2761087E+05  1.2702344E+05
  1.2643870E+05  1.2585666E+05  1.2527731E+05  1.2470062E+05
  1.2412659E+05  1.2355519E+05  1.2298643E+05  1.2242028E+05
  1.2185674E+05  1.2129580E+05  1.2073744E+05  1.2018164E+05
  1.1962841E+05  1.1907772E+05  1.1852957E+05  1.1798394E+05
  1.1744082E+05  1.1690020E+05  1.1636208E+05  1.1582642E+05
  1.1529324E+05  1.1476251E+05  1.1423422E+05  1.1370837E+05
  1.1318493E+05  1.1266391E+05  1.1214527E+05  1.1162903E+05
  1.1111517E+05  1.1060367E+05  1.1009453E+05  1.0958773E+05
  1.0908327E+05  1.0858112E+05  1.0808128E+05  1.0758376E+05
  1.0708852E+05  1.0659555E+05  1.0610486E+05  1.0561642E+05
  1.0513023E+05  1.0464629E+05  1.0416457E+05  1.0368507E+05
  1.0320777E+05  1.0273267E+05  1.0225977E+05  1.0178903E+05
  1.0132046E+05  1.0085405E+05  1.0038979E+05  9.9927664E+04
  9.9467664E+04  9.9009781E+04  9.8554008E+04  9.8100336E+04
  9.7648750E+04  9.7199242E+04  9.6751805E+04  9.6306422E+04
  9.5863094E+04  9.5421805E+04  9.4982547E+04  9.4545312E+04
  9.4110094E+04  9.3676875E+04  9.3245648E+04  9.2816414E+04
  9.2389148E+04  9.1963852E+04  9.1540516E+04  9.1119125E+04
  9.0699672E+04  9.0282156E+04  8.9866555E+04  8.9452875E+04
  8.9041094E+04  8.8631211E+04  8.8223211E+04  8.7817094E+04
  8.7412844E+04  8.7010453E+04  8.6609914E+04  8.6211227E+04
  8.5814367E+04  8.5419336E+04  8.5026125E+04  8.4634719E+04
  8.4245125E+04  8.3857312E+04  8.3471297E+04  8.3087047E+04
  8.2704570E+04  8.2323859E+04  8.1944898E+04  8.1567680E+04
  8.1192195E+04  8.0818445E+04  8.0446406E+04  8.0076094E+04
  7.9707477E+04  7.9340555E+04  7.8975328E+04  7.8611781E+04
  7.8249906E+04  7.7889695E+04  7.7531141E+04  7.7174242E+04
  7.6818984E+04  7.6465359E+04  7.6113367E+04  7.5762992E+04
  7.5414234E+04  7.5067078E+04  7.4721523E+04  7.4377555E+04
  7.4035172E+04  7.3694367E+04  7.3355125E+04  7.3017453E+04
  7.2681328E+04  7.2346750E+04  7.2013719E+04  7.1682219E+04
  7.1352242E+04  7.1023781E+04  7.0696836E+04  7.0371398E+04
  7.0047461E+04  6.9725008E+04  6.9404039E+04  6.9084547E+04
  6.8766531E+04  6.8449977E+04  6.8134883E+04  6.7821234E+04
  6.7509031E+04  6.7198266E+04  6.6888930E+04  6.6581023E+04
  6.6274531E+04  6.5969445E+04  6.5665766E+04  6.5363488E+04
  6.5062602E+04  6.4763094E+04  6.4464969E+04  6.4168219E+04
  6.3872832E+04  6.3578805E+04  6.3286133E+04  6.2994805E+04
  6.2704820E+04  6.2416172E+04  6.2128852E+04  6.1842852E+04
  6.1558168E+04  6.1274797E+04  6.0992730E+04  6.0711961E+04
  6.0432484E+04  6.0154297E+04  5.9877387E+04  5.9601754E+04
  5.9327387E+04  5.9054281E+04  5.8782438E+04  5.8511844E+04
  5.8242496E+04  5.7974387E+04  5.7707512E+04  5.7441867E+04
  5.7177441E+04  5.6914238E+04  5.6652242E+04  5.6391453E+04
  5.6131867E+04  5.5873477E+04  5.5616273E+04  5.5360254E+04
  5.5105414E+04  5.4851746E+04  5.4599246E+04  5.4347906E+04
  5.4097727E+04  5.3848699E+04  5.3600816E+04  5.3354074E+04
  5.3108469E+04  5.2863992E+04  5.2620641E+04  5.2378414E+04
  5.2137301E+04  5.1897297E+04  5.1658395E+04  5.1420594E+04
  5.1183891E+04  5.0948273E+04  5.0713746E+04  5.0480293E+04
  5.0247914E+04  5.0016609E+04  4.9786367E+04  4.9557184E+04
  4.9329059E+04  4.9101980E+04  4.8875949E+04  4.8650957E+04
  4.8427000E+04  4.8204074E+04  4.7982176E+04  4.7761301E+04
  4.7541441E+04  4.7322594E+04  4.7104750E+04  4.6887914E+04
  4.6672074E+04  4.6457227E+04  4.6243371E+04  4.6030496E+04
  4.5818605E+04  4.5607688E+04  4.5397738E+04  4.5188762E+04
  4.4980742E+04  4.4773684E+04  4.4567574E+04  4.4362414E+04
  4.4158203E+04  4.3954926E+04  4.3752590E+04  4.3551184E+04
  4.3350703E+04  4.3151145E+04  4.2952508E+04  4.2754781E+04
  4.2557969E+04  4.2362062E+04  4.2167055E+04  4.1972949E+04
  4.1779734E+04  4.1587406E+04  4.1395969E+04  4.1205406E+04
  4.1015727E+04  4.0826922E+04  4.0638980E+04  4.0451906E+04
  4.0265691E+04  4.0080336E+04  3.9895836E+04  3.9712184E+04
  3.9529375E+04  3.9347406E+04  3.9166281E+04  3.8985984E+04
  3.8806520E+04  3.8627879E+04  3.8450066E+04  3.8273066E+04
  3.8096887E+04  3.7921512E+04  3.7746949E+04  3.7573188E+04
  3.7400227E+04  3.7228059E+04  3.7056688E+04  3.6886105E+04
  3.6716305E+04  3.6547289E+04  3.6379051E+04  3.6211586E+04
  3.6044891E+04  3.5878969E+04  3.5713805E+04  3.5549402E+04
  3.5385758E+04  3.5222863E+04  3.5060727E+04  3.4899328E+04
  3.4738676E+04  3.4578762E+04  3.4419586E+04  3.4261141E+04
  3.4103426E+04  3.3946438E+04  3.3790172E+04  3.3634625E+04
  3.3479797E+04  3.3325676E+04  3.3172266E+04  3.3019566E+04
  3.2867566E+04  3.2716266E+04  3.2565662E+04  3.2415752E+04
  3.2266533E+04  3.2118000E+04  3.1970150E+04  3.1822982E+04
  3.1676490E+04  3.1530672E+04  3.1385527E+04  3.1241051E+04
  3.1097238E+04  3.0954088E+04  3.0811598E+04  3.0669760E+04
  3.0528578E+04  3.0388045E+04  3.0248160E+04  3.0108918E+04
  2.9970318E+04  2.9832355E+04  2.9695027E+04  2.9558330E+04
  2.9422266E+04  2.9286824E+04  2.9152008E+04  2.9017812E+04
  2.8884234E+04  2.8751270E+04  2.8618920E+04  2.8487178E+04
  2.8356043E+04  2.8225510E+04  2.8095580E+04  2.7966248E+04
  2.7837510E+04  2.7709365E+04  2.7581811E+04  2.7454842E+04
  2.7328461E+04  2.7202658E+04  2.7077436E+04  2.6952789E+04
  2.6828717E+04  2.6705215E+04  2.6582283E+04  2.6459918E+04
  2.6338113E+04  2.6216869E+04  2.6096186E+04  2.5976057E+04
  2.5856480E+04  2.5737455E+04  2.5618977E+04  2.5501045E+04
  2.5383658E+04  2.5266807E+04  2.5143551E+04  2.5027797E+04
  2.4912580E+04  2.4797889E+04  2.4683725E+04  2.4570082E+04
  2.4456961E+04  2.4344357E+04  2.4232268E+04  2.4120688E+04
  2.4009617E+04  2.3899053E+04  2.3788992E+04  2.3679430E+04
  2.3570365E+04  2.3461795E+04  2.3353717E+04  2.3246129E+04
  2.3139025E+04  2.3032404E+04  2.2926266E+04  2.2820604E+04
  2.2715418E+04  2.2610705E+04  2.2506461E+04  2.2402684E+04
  2.2299373E+04  2.2196523E+04  2.2094133E+04  2.1992199E+04
  2.1890719E+04  2.1789691E+04  2.1689113E+04  2.1588980E+04
  2.1489293E+04  2.1390047E+04  2.1291238E+04  2.1192867E+04
  2.1094930E+04  2.0997426E+04  2.0900350E+04  2.0803699E+04
  2.0707475E+04  2.0611670E+04  2.0516287E+04  2.0421318E+04
  2.0326768E+04  2.0232627E+04  2.0138898E+04  2.0045576E+04
  1.9952658E+04  1.9860145E+04  1.9768033E+04  1.9676318E+04
  1.9585000E+04  1.9494076E+04  1.9403543E+04  1.9313400E+04
  1.9223645E+04  1.9134275E+04  1.9045287E+04  1.8956682E+04
  1.8868453E+04  1.8780602E+04  1.8693125E+04  1.8606020E+04
  1.8519285E+04  1.8432918E+04  1.8346918E+04  1.8261279E+04
  1.8176004E+04  1.8091088E+04  1.8006531E+04  1.7922328E+04
  1.7838480E+04  1.7754982E+04  1.7671836E+04  1.7589035E+04
  1.7506580E+04  1.7424471E+04  1.7342703E+04  1.7261273E+04
  1.7180184E+04  1.7099428E+04  1.7019008E+04  1.6938920E+04
  1.6859162E+04  1.6779732E+04  1.6700629E+04  1.6621852E+04
  1.6543398E+04  1.6465264E+04  1.6387449E+04  1.6309953E+04
  1.6232773E+04  1.6155906E+04  1.6079353E+04  1.6003108E+04
  1.5927174E+04  1.5851547E+04  1.5776225E+04  1.5701206E+04
  1.5626489E+04  1.5552073E+04  1.5477956E+04  1.5404136E+04
  1.5330610E+04  1.5257379E+04  1.5184440E+04  1.5111791E+04
  1.5039432E+04  1.4967359E+04  1.4895572E+04  1.4824070E+04
  1.4752850E+04  1.4681911E+04  1.4611252E+04  1.4540870E+04
  1.4470766E+04  1.4400936E+04  1.4331379E+04  1.4262095E+04
  1.4193081E+04  1.4124336E+04  1.4055858E+04  1.3987647E+04
  1.3919701E+04  1.3852018E+04  1.3784597E+04  1.3717436E+04
  1.3650533E+04  1.3583890E+04  1.3517502E+04  1.3451369E+04
  1.3385489E+04  1.3319862E+04  1.3254486E+04  1.3189360E+04
  1.3124481E+04  1.3059851E+04  1.2995465E+04  1.2931323E+04
  1.2867426E+04  1.2803770E+04  1.2740354E+04  1.2677178E+04
  1.2614239E+04  1.2551537E+04  1.2489072E+04  1.2426841E+04
  1.2364843E+04  1.2303076E+04  1.2241541E+04  1.2180236E+04
  1.2119159E+04  1.2058310E+04  1.1997686E+04  1.1937288E+04
  1.1877113E+04  1.1817162E+04  1.1757433E+04  1.1697923E+04
  1.1638634E+04  1.1579562E+04  1.1520709E+04  1.1462071E+04
  1.1403648E+04  1.1345440E+04  1.1287445E+04  1.1229663E+04
  1.1172091E+04  1.1114729E+04  1.1057577E+04  1.1000633E+04
  1.0943896E+04  1.0887364E+04  1.0831038E+04  1.0774916E+04
  1.0718997E+04  1.0663280E+04  1.0607766E+04  1.0552450E+04
  1.0497335E+04  1.0442419E+04  1.0387699E+04  1.0333177E+04
  1.0278851E+04  1.0224719E+04  1.0170781E+04  1.0117037E+04
  1.0063485E+04  1.0010125E+04  9.9569551E+03  9.9039746E+03
  9.8511836E+03  9.7985811E+03  9.7461660E+03  9.6939365E+03
  9.6418936E+03  9.5900361E+03  9.5383613E+03  9.4868711E+03
  9.4355635E+03  9.3844365E+03  9.3334922E+03  9.2827275E+03
  9.2321426E+03  9.1817363E+03  9.1315078E+03  9.0814570E+03
  9.0315840E+03  8.9818857E+03  8.9323633E+03  8.8830146E+03
  8.8338408E+03  8.7848398E+03  8.7360117E+03  8.6873555E+03
  8.6388711E+03  8.5905566E+03  8.5424121E+03  8.4944365E+03
  8.4466309E+03  8.3989922E+03  8.3515215E+03  8.3042168E+03
  8.2570791E+03  8.2101074E+03  8.1633003E+03  8.1166577E+03
  8.0701787E+03  8.0238633E+03  7.9777104E+03  7.9317197E+03
  7.8858906E+03  7.8402231E+03  7.7947153E+03  7.7493682E+03
  7.7041802E+03  7.6591514E+03  7.6142803E+03  7.5695679E+03
  7.5250127E+03  7.4806143E+03  7.4363721E+03  7.3922861E+03
  7.3483555E+03  7.3045796E+03  7.2609580E+03  7.2174907E+03
  7.1741768E+03  7.1310161E+03  7.0880083E+03  7.0451523E+03
  7.0024482E+03  6.9598950E+03  6.9174932E+03  6.8752417E+03
  6.8331401E+03  6.7911885E+03  6.7493857E+03  6.7077319E+03
  6.6662261E+03  6.6248687E+03  6.5836587E+03  6.5425962E+03
  6.5016802E+03  6.4609111E+03  6.4202881E+03  6.3798105E+03
  6.3394785E+03  6.2992915E+03  6.2592490E+03  6.2193511E+03
  6.1795972E+03  6.1399868E+03  6.1005195E+03  6.0611958E+03
  6.0220146E+03  5.9829756E+03  5.9440786E+03  5.9053237E+03
  5.8667100E+03  5.8282373E+03  5.7899053E+03  5.7517144E+03
  5.7136636E+03  5.6757524E+03  5.6379814E+03  5.6003496E+03
  5.5628569E+03  5.5255029E+03  5.4882876E+03  5.4512109E+03
  5.4142725E+03  5.3774712E+03  5.3408081E+03  5.3042822E+03
  5.2678931E+03  5.2316411E+03  5.1955259E+03  5.1595474E+03
  5.1237046E+03  5.0879976E+03  5.0524268E+03  5.0169917E+03
  4.9816914E+03  4.9465264E+03  4.9114961E+03  4.8766006E+03
  4.8418398E+03  4.8072134E+03  4.7727212E+03  4.7383623E+03
  4.7041377E+03  4.6700464E+03  4.6360884E+03  4.6022642E+03
  4.5685723E+03  4.5350137E+03  4.5015874E+03  4.4682939E+03
  4.4351328E+03  4.4021035E+03  4.3692070E+03  4.3364419E+03
  4.3038086E+03  4.2713071E+03  4.2389365E+03  4.2066978E+03
  4.1745898E+03  4.1426133E+03  4.1107676E+03  4.0790525E+03
  4.0474680E+03  4.0160139E+03  3.9846904E+03  3.9534971E+03
  3.9224338E+03  3.8915005E+03  3.8606973E+03  3.8300237E+03
  3.7994797E+03  3.7690654E+03  3.7387808E+03  3.7086250E+03
  3.6785986E+03  3.6487014E+03  3.6189333E+03  3.5892939E+03
  3.5597834E+03  3.5304021E+03  3.5011487E+03  3.4720242E+03
  3.4430283E+03  3.4141604E+03  3.3854209E+03  3.3568098E+03
  3.3283264E+03  3.2999714E+03  3.2717441E+03  3.2436448E+03
  3.2156733E+03  3.1878296E+03  3.1601130E+03  3.1325244E+03
  3.1050632E+03  3.0777292E+03  3.0505227E+03  3.0234436E+03
  2.9964915E+03  2.9696665E+03  2.9429688E+03  2.9163977E+03
  2.8899539E+03  2.8636365E+03  2.8374463E+03  2.8113826E+03
  2.7854456E+03  2.7596353E+03  2.7339512E+03  2.7083940E+03
  2.6829629E+03  2.6576584E+03  2.6324802E+03  2.6074280E+03
  2.5825022E+03  2.5577024E+03  2.5330288E+03  2.5084810E+03
  2.4840593E+03  2.4597634E+03  2.4355935E+03  2.4115493E+03
  2.3876306E+03  2.3638379E+03  2.3401707E+03  2.3166289E+03
  2.2932129E+03  2.2699221E+03  2.2467568E+03  2.2237168E+03
  2.2008020E+03  2.1780125E+03  2.1553481E+03  2.1328088E+03
  2.1103948E+03  2.0881055E+03  2.0659414E+03  2.0439019E+03
  2.0219873E+03  2.0001975E+03  1.9785323E+03  1.9569919E+03
  1.9355760E+03  1.9142845E+03  1.8931177E+03  1.8720751E+03
  1.8511569E+03  1.8303629E+03  1.8096931E+03  1.7891475E+03
  1.7687258E+03  1.7484282E+03  1.7282545E+03  1.7082047E+03
  1.6882787E+03  1.6684763E+03  1.6487976E+03  1.6292424E+03
  1.6098108E+03  1.5905026E+03  1.5713176E+03  1.5522559E+03
  1.5333174E+03  1.5145020E+03  1.4958096E+03  1.4772400E+03
  1.4587933E+03  1.4404694E+03  1.4222681E+03  1.4041893E+03
  1.3862332E+03  1.3683992E+03  1.3506876E+03  1.3330981E+03
  1.3156307E+03  1.2982853E+03  1.2810618E+03  1.2639601E+03
  1.2469800E+03  1.2301213E+03  1.2133842E+03  1.1967684E+03
  1.1802738E+03  1.1639003E+03  1.1476477E+03  1.1315160E+03
  1.1155050E+03  1.0996145E+03  1.0838446E+03  1.0681949E+03
  1.0526655E+03  1.0372562E+03  1.0219667E+03  1.0067971E+03
  9.9174701E+02  9.7681647E+02  9.6200525E+02  9.4731317E+02
  9.3274017E+02  9.1828607E+02  9.0395062E+02  8.8973376E+02
  8.7563525E+02  8.6165497E+02  8.4779272E+02  8.3404840E+02
  8.2042169E+02  8.0691254E+02  7.9352069E+02  7.8024597E+02
  7.6708820E+02  7.5404718E+02  7.4112274E+02  7.2831470E+02
  7.1562274E+02  7.0304675E+02  6.9058649E+02  6.7824176E+02
  6.6601233E+02  6.5389801E+02  6.4189856E+02  6.3001367E+02
  6.1824329E+02  6.0658704E+02  5.9504468E+02  5.8361609E+02
  5.7230090E+02  5.6109888E+02  5.5000983E+02  5.3903345E+02
  5.2816949E+02  5.1741772E+02  5.0677786E+02  4.9624957E+02
  4.8583264E+02  4.7552676E+02  4.6533167E+02  4.5524704E+02
  4.4527261E+02  4.3540808E+02  4.2565314E+02  4.1600748E+02
  4.0647076E+02  3.9704276E+02  3.8772305E+02  3.7851135E+02
  3.6940735E+02  3.6041071E+02  3.5152109E+02  3.4273813E+02
  3.3406146E+02  3.2549081E+02  3.1702579E+02  3.0866599E+02
  3.0041107E+02  2.9226068E+02  2.8421445E+02  2.7627194E+02
  2.6843286E+02  2.6069672E+02  2.5306320E+02  2.4553188E+02
  2.3810231E+02  2.3077414E+02  2.2354691E+02  2.1642023E+02
  2.0939365E+02  2.0246675E+02  1.9563908E+02  1.8891022E+02
  1.8227971E+02  1.7574709E+02  1.6931190E+02  1.6297371E+02
  1.5673201E+02  1.5058633E+02  1.4453619E+02  1.3858113E+02
  1.3272064E+02  1.2695421E+02  1.2128134E+02  1.1570153E+02
  1.1021426E+02  1.0481902E+02  9.9515259E+01  9.4302452E+01
  8.9180069E+01  8.4147568E+01  7.9204376E+01  7.4349953E+01
  6.9583733E+01  6.4905136E+01  6.0313595E+01  5.5808529E+01
  5.1389343E+01  4.7055447E+01  4.2806236E+01  3.8641102E+01
  3.4559433E+01  3.0560604E+01  2.6643995E+01  2.2808968E+01
  1.9054882E+01  1.5381090E+01  1.1786939E+01  8.2717667E+00
  4.8349085E+00  1.4756888E+00 -1.8065729E+00 -5.0125647E+00
 -8.1429806E+00 -1.1198523E+01 -1.4179899E+01 -1.7087826E+01
 -1.9923025E+01 -2.2686226E+01 -2.5378168E+01 -2.7999590E+01
 -3.0551250E+01 -3.3033901E+01 -3.5448311E+01 -3.7795250E+01
 -4.0075504E+01 -4.2289852E+01 -4.4439098E+01 -4.6524044E+01
 -4.8545494E+01 -5.0504269E+01 -5.2401192E+01 -5.4237103E+01
 -5.6012833E+01 -5.7729237E+01 -5.9387169E+01 -6.0987488E+01
 -6.2531071E+01 -6.4018799E+01 -6.5451553E+01 -6.6830231E+01
 -6.8155731E+01 -6.9428978E+01 -7.0650871E+01 -7.1822357E+01
 -7.2944359E+01 -7.4017822E+01 -7.5043701E+01 -7.6022957E+01
 -7.6956551E+01 -7.7845459E+01 -7.8690674E+01 -7.9493179E+01
 -8.0253983E+01 -8.0974091E+01 -8.1654526E+01 -8.2296310E+01
 -8.2900482E+01 -8.3468086E+01 -8.4000168E+01 -8.4497795E+01
 -8.4962036E+01 -8.5393967E+01 -8.5794678E+01 -8.6165260E+01
 -8.6506828E+01 -8.6820488E+01 -8.7107368E+01 -8.7368591E+01
 -8.7605309E+01 -8.7818657E+01 -8.8009811E+01 -8.8179924E+01
 -8.8330185E+01 -8.8461777E+01 -8.8575890E+01 -8.8673737E+01
 -8.8756523E+01 -8.8825478E+01 -8.8881828E+01 -8.8926819E+01
 -8.8961708E+01 -8.8987747E+01 -8.9006218E+01 -8.9018387E+01
 -8.9025558E+01 -8.9029015E+01 -8.9030083E+01 -8.9040199E+01
 -8.9039642E+01 -8.9038559E+01 -8.9036964E+01 -8.9034851E+01
 -8.9032219E+01 -8.9029076E+01 -8.9025421E+01 -8.9021255E+01
 -8.9016579E+01 -8.9011391E+01 -8.9005692E+01 -8.8999496E+01
 -8.8992790E+01 -8.8985573E+01 -8.8977859E+01 -8.8969643E+01
 -8.8960922E+01 -8.8951706E+01 -8.8941994E+01 -8.8931778E+01
 -8.8921066E+01 -8.8909866E+01 -8.8898170E+01 -8.8885979E+01
 -8.8873299E+01 -8.8860123E+01 -8.8846466E+01 -8.8832314E+01
 -8.8817680E+01 -8.8802559E+01 -8.8786949E+01 -8.8770866E+01
 -8.8754295E+01 -8.8737244E+01 -8.8719711E+01 -8.8701706E+01
 -8.8683220E+01 -8.8664261E+01 -8.8644821E+01 -8.8624916E+01
 -8.8604530E+01 -8.8583679E+01 -8.8562355E+01 -8.8540565E+01
 -8.8518303E+01 -8.8495583E+01 -8.8472389E+01 -8.8448730E+01
 -8.8424614E+01 -8.8400032E+01 -8.8374992E+01 -8.8349495E+01
 -8.8323540E+01 -8.8297127E+01 -8.8270256E+01 -8.8242928E+01
 -8.8215149E+01 -8.8186920E+01 -8.8158241E+01 -8.8129112E+01
 -8.8099533E+01 -8.8069504E+01 -8.8039032E+01 -8.8008110E+01
 -8.7976753E+01 -8.7944946E+01 -8.7912697E+01 -8.7880013E+01
 -8.7846893E+01 -8.7813324E+01 -8.7779327E+01 -8.7744888E+01
 -8.7710022E+01 -8.7674721E+01 -8.7638985E+01 -8.7602814E+01
 -8.7566223E+01 -8.7529198E+01 -8.7491745E+01 -8.7453873E+01
 -8.7415573E+01 -8.7376846E+01 -8.7337692E+01 -8.7298126E+01
 -8.7258141E+01 -8.7217728E+01 -8.7176903E+01 -8.7135658E+01
 -8.7094002E+01 -8.7051933E+01 -8.7009445E+01 -8.6966553E+01
 -8.6923241E+01 -8.6879524E+01 -8.6835403E+01 -8.6790871E+01
 -8.6745934E+01 -8.6700592E+01 -8.6654846E+01 -8.6608696E+01
 -8.6562149E+01 -8.6515198E+01 -8.6467850E+01 -8.6420105E+01
 -8.6371964E+01 -8.6323425E+01 -8.6274498E+01 -8.6225174E+01
 -8.6175461E+01 -8.6125359E+01 -8.6074860E+01 -8.6023979E+01
 -8.5972710E+01 -8.5921051E+01 -8.5869019E+01 -8.5816589E+01
 -8.5763786E+01 -8.5710602E+01 -8.5657036E+01 -8.5603096E+01
 -8.5548767E+01 -8.5494072E+01 -8.5439003E+01 -8.5383553E+01
 -8.5327736E+01 -8.5271545E+01 -8.5214989E+01 -8.5158058E+01
 -8.5100761E+01 -8.5043098E+01 -8.4985069E+01 -8.4926674E+01
 -8.4867920E+01 -8.4808800E+01 -8.4749321E+01 -8.4689484E+01
 -8.4629288E+01 -8.4568733E+01 -8.4507820E+01 -8.4446556E+01
 -8.4384941E+01 -8.4322968E+01 -8.4260651E+01 -8.4197975E+01
 -8.4134956E+01 -8.4071587E+01 -8.4007874E+01 -8.3943810E+01
 -8.3879410E+01 -8.3814659E+01 -8.3749573E+01 -8.3684143E+01
 -8.3618378E+01 -8.3552269E+01 -8.3485825E+01 -8.3419044E+01
 -8.3351929E+01 -8.3284485E+01 -8.3216705E+01 -8.3148598E+01
 -8.3080154E+01 -8.3011391E+01 -8.2942291E+01 -8.2872871E+01
 -8.2803123E+01 -8.2733047E+01 -8.2662659E+01 -8.2591942E+01
 -8.2520905E+01 -8.2449547E+01 -8.2377876E+01 -8.2305885E+01
 -8.2233582E+01 -8.2160965E+01 -8.2088028E+01 -8.2014786E+01
 -8.1941231E+01 -8.1867363E+01 -8.1793190E+01 -8.1718712E+01
 -8.1643929E+01 -8.1568832E+01 -8.1493439E+01 -8.1417740E+01
 -8.1341743E+01 -8.1265442E+01 -8.1188843E+01 -8.1111946E+01
 -8.1034752E+01 -8.0957268E+01 -8.0879486E+01 -8.0801407E+01
 -8.0723045E+01 -8.0644386E+01 -8.0565437E+01 -8.0486206E+01
 -8.0406677E+01 -8.0326874E+01 -8.0246780E+01 -8.0166405E+01
 -8.0085747E+01 -8.0004807E+01 -7.9923584E+01 -7.9842087E+01
 -7.9760315E+01 -7.9678261E+01 -7.9595932E+01 -7.9513329E+01
 -7.9430458E+01 -7.9347313E+01 -7.9263893E+01 -7.9180206E+01
 -7.9096252E+01 -7.9012032E+01 -7.8927551E+01 -7.8842796E+01
 -7.8757782E+01 -7.8672508E+01 -7.8586975E+01 -7.8501175E+01
 -7.8415123E+01 -7.8328804E+01 -7.8242241E+01 -7.8155418E+01
 -7.8068336E+01 -7.7981010E+01 -7.7893425E+01 -7.7805595E+01
 -7.7717514E+01 -7.7629189E+01 -7.7540611E+01 -7.7451790E+01
 -7.7362724E+01 -7.7273415E+01 -7.7183868E+01 -7.7094078E+01
 -7.7004051E+01 -7.6913780E+01 -7.6823273E+01 -7.6732529E+01
 -7.6641556E+01 -7.6550346E+01 -7.6458900E+01 -7.6367226E+01
 -7.6275322E+01 -7.6183189E+01 -7.6090836E+01 -7.5998245E+01
 -7.5905434E+01 -7.5812401E+01 -7.5719139E+01 -7.5625656E+01
 -7.5531952E+01 -7.5438034E+01 -7.5343895E+01 -7.5249542E+01
 -7.5154968E+01 -7.5060181E+01 -7.4965179E+01 -7.4869972E+01
 -7.4774544E+01 -7.4678917E+01 -7.4583076E+01 -7.4487022E+01
 -7.4390770E+01 -7.4294312E+01 -7.4197647E+01 -7.4100777E+01
 -7.4003716E+01 -7.3906441E+01 -7.3808975E+01 -7.3711311E+01
 -7.3613449E+01 -7.3515388E+01 -7.3417137E+01 -7.3318687E+01
 -7.3220055E+01 -7.3121223E+01 -7.3022202E+01 -7.2922997E+01
 -7.2823608E+01 -7.2724022E+01 -7.2624260E+01 -7.2524307E+01
 -7.2424179E+01 -7.2323868E+01 -7.2223373E+01 -7.2122704E+01
 -7.2021851E+01 -7.1920830E+01 -7.1819626E+01 -7.1718246E+01
 -7.1616699E+01 -7.1514977E+01 -7.1413094E+01 -7.1311028E+01
 -7.1208801E+01 -7.1106407E+01 -7.1003845E+01 -7.0901115E+01
 -7.0798225E+01 -7.0695175E+01 -7.0591957E+01 -7.0488586E+01
 -7.0385056E+01 -7.0281364E+01 -7.0177521E+01 -7.0073517E+01
 -6.9969360E+01 -6.9865051E+01 -6.9760590E+01 -6.9655983E+01
 -6.9551224E+01 -6.9446312E+01 -6.9341263E+01 -6.9236061E+01
 -6.9130714E+01 -6.9025223E+01 -6.8919594E+01 -6.8813828E+01
 -6.8707916E+01 -6.8601868E+01 -6.8495674E+01 -6.8389351E+01
 -6.8282898E+01 -6.8176300E+01 -6.8069580E+01 -6.7962723E+01
 -6.7855736E+01 -6.7748619E+01 -6.7641380E+01 -6.7534004E+01
 -6.7426514E+01 -6.7318893E+01 -6.7211151E+01 -6.7103279E+01
 -6.6995300E+01 -6.6887192E+01 -6.6778969E+01 -6.6670624E+01
 -6.6562172E+01 -6.6453598E+01 -6.6344917E+01 -6.6236115E+01
 -6.6127205E+01 -6.6018188E+01 -6.5909058E+01 -6.5799828E+01
 -6.5690483E+01 -6.5581032E+01 -6.5471481E+01 -6.5361824E+01
 -6.5252075E+01 -6.5142212E+01 -6.5032257E+01 -6.4922203E+01
 -6.4812050E+01 -6.4701805E+01 -6.4591461E+01 -6.4481026E+01
 -6.4370499E+01 -6.4259880E+01 -6.4149170E+01 -6.4038376E+01
 -6.3927490E+01 -6.3816521E+01 -6.3705463E+01 -6.3594322E+01
 -6.3483101E+01 -6.3371796E+01 -6.3260410E+01 -6.3148949E+01
 -6.3037403E+01 -6.2925785E+01 -6.2814091E+01 -6.2702324E+01
 -6.2590481E+01 -6.2478569E+01 -6.2366581E+01 -6.2254528E+01
 -6.2142403E+01 -6.2030212E+01 -6.1917953E+01 -6.1805634E+01
 -6.1693249E+01 -6.1580799E+01 -6.1468292E+01 -6.1355724E+01
 -6.1243095E+01 -6.1130409E+01 -6.1017666E+01 -6.0904869E+01
 -6.0792015E+01 -6.0679108E+01 -6.0566151E+01 -6.0453144E+01
 -6.0340084E+01 -6.0226978E+01 -6.0113827E+01 -6.0000626E+01
 -5.9887383E+01 -5.9774094E+01 -5.9660767E+01 -5.9547394E+01
 -5.9433987E+01 -5.9320534E+01 -5.9207047E+01 -5.9093525E+01
 -5.8979965E+01 -5.8866371E+01 -5.8752747E+01 -5.8639088E+01
 -5.8525398E+01 -5.8411682E+01 -5.8297939E+01 -5.8184166E+01
 -5.8070366E+01 -5.7956547E+01 -5.7842701E+01 -5.7728828E+01
 -5.7614941E+01 -5.7501034E+01 -5.7387104E+01 -5.7273159E+01
 -5.7159199E+01 -5.7045223E+01 -5.6931232E+01 -5.6817230E+01
 -5.6703217E+01 -5.6589191E+01 -5.6475159E+01 -5.6361115E+01
 -5.6247066E+01 -5.6133011E+01 -5.6018955E+01 -5.5904896E+01
 -5.5790829E+01 -5.5676769E+01 -5.5562702E+01 -5.5448639E+01
 -5.5334579E+01 -5.5220524E+01 -5.5106476E+01 -5.4992432E+01
 -5.4878395E+01 -5.4764366E+01 -5.4650349E+01 -5.4536343E+01
 -5.4422348E+01 -5.4308369E+01 -5.4194401E+01 -5.4080448E+01
 -5.3966518E+01 -5.3852604E+01 -5.3738705E+01 -5.3624828E+01
 -5.3510979E+01 -5.3397148E+01 -5.3283340E+01 -5.3169559E+01
 -5.3055805E+01 -5.2942078E+01 -5.2828381E+01 -5.2714714E+01
 -5.2601074E+01 -5.2487469E+01 -5.2373901E+01 -5.2260365E+01
 -5.2146866E+01 -5.2033401E+01 -5.1919979E+01 -5.1806595E+01
 -5.1693253E+01 -5.1579948E+01 -5.1466694E+01 -5.1353477E+01
 -5.1240307E+01 -5.1127186E+01 -5.1014114E+01 -5.0901089E+01
 -5.0788113E+01 -5.0675190E+01 -5.0562321E+01 -5.0449501E+01
 -5.0336742E+01 -5.0224037E+01 -5.0111389E+01 -4.9998798E+01
 -4.9886269E+01 -4.9773800E+01 -4.9661396E+01 -4.9549053E+01
 -4.9436771E+01 -4.9324558E+01 -4.9212414E+01 -4.9100338E+01
 -4.8988327E+01 -4.8876389E+01 -4.8764523E+01 -4.8652729E+01
 -4.8541012E+01 -4.8429367E+01 -4.8317799E+01 -4.8206306E+01
 -4.8094898E+01 -4.7983566E+01 -4.7872314E+01 -4.7761147E+01
 -4.7650063E+01 -4.7539062E+01 -4.7428150E+01 -4.7317322E+01
 -4.7206585E+01 -4.7095936E+01 -4.6985378E+01 -4.6874908E+01
 -4.6764538E+01 -4.6654259E+01 -4.6544075E+01 -4.6433987E+01
 -4.6323997E+01 -4.6214108E+01 -4.6104317E+01 -4.5994629E+01
 -4.5885044E+01 -4.5775558E+01 -4.5666183E+01 -4.5556911E+01
 -4.5447746E+01 -4.5338692E+01 -4.5229744E+01 -4.5120911E+01
 -4.5012188E+01 -4.4903576E+01 -4.4795082E+01 -4.4686703E+01
 -4.4578442E+01 -4.4470295E+01 -4.4362267E+01 -4.4254364E+01
 -4.4146580E+01 -4.4038918E+01 -4.3931381E+01 -4.3823967E+01
 -4.3716682E+01 -4.3609524E+01 -4.3502495E+01 -4.3395596E+01
 -4.3288826E+01 -4.3182190E+01 -4.3075687E+01 -4.2969318E+01
 -4.2863087E+01 -4.2756989E+01 -4.2651031E+01 -4.2545212E+01
 -4.2439533E+01 -4.2334000E+01 -4.2228607E+01 -4.2123356E+01
 -4.2018253E+01 -4.1913296E+01 -4.1808487E+01 -4.1703827E+01
 -4.1599316E+01 -4.1494957E+01 -4.1390751E+01 -4.1286701E+01
 -4.1182800E+01 -4.1079056E+01 -4.0975471E+01 -4.0872047E+01
 -4.0768780E+01 -4.0665672E+01 -4.0562729E+01 -4.0459946E+01
 -4.0357330E+01 -4.0254879E+01 -4.0152592E+01 -4.0050476E+01
 -3.9948528E+01 -3.9846748E+01 -3.9745144E+01 -3.9643711E+01
 -3.9542450E+01 -3.9441368E+01 -3.9340458E+01 -3.9239727E+01
 -3.9139172E+01 -3.9038799E+01 -3.8938610E+01 -3.8838600E+01
 -3.8738773E+01 -3.8639130E+01 -3.8539677E+01 -3.8440407E+01
 -3.8341324E+01 -3.8242432E+01 -3.8143730E+01 -3.8045219E+01
 -3.7946903E+01 -3.7848778E+01 -3.7750851E+01 -3.7653118E+01
 -3.7555584E+01 -3.7458248E+01 -3.7361115E+01 -3.7264179E+01
 -3.7167446E+01 -3.7070919E+01 -3.6974594E+01 -3.6878479E+01
 -3.6782566E+01 -3.6686867E+01 -3.6591370E+01 -3.6496086E+01
 -3.6401016E+01 -3.6306160E+01 -3.6211517E+01 -3.6117088E+01
 -3.6022877E+01 -3.5928886E+01 -3.5835110E+01 -3.5741554E+01
 -3.5648220E+01 -3.5555111E+01 -3.5462223E+01 -3.5369560E+01
 -3.5277126E+01 -3.5184914E+01 -3.5092934E+01 -3.5001186E+01
 -3.4909664E+01 -3.4818378E+01 -3.4727322E+01 -3.4636501E+01
 -3.4545918E+01 -3.4455570E+01 -3.4365459E+01 -3.4275589E+01
 -3.4185959E+01 -3.4096569E+01 -3.4007423E+01 -3.3918522E+01
 -3.3829861E+01 -3.3741451E+01 -3.3653286E+01 -3.3565372E+01
 -3.3477707E+01 -3.3390293E+01 -3.3303131E+01 -3.3216221E+01
 -3.3129570E+01 -3.3043171E+01 -3.2957031E+01 -3.2871147E+01
 -3.2786461E+01 -3.2701099E+01 -3.2615993E+01 -3.2531147E+01
 -3.2446560E+01 -3.2362228E+01 -3.2278152E+01 -3.2194328E+01
 -3.2110764E+01 -3.2027451E+01 -3.1944387E+01 -3.1861574E+01
 -3.1779015E+01 -3.1696705E+01 -3.1614643E+01 -3.1532827E+01
 -3.1451258E+01 -3.1369938E+01 -3.1288860E+01 -3.1208027E+01
 -3.1127439E+01 -3.1047092E+01 -3.0966988E+01 -3.0887125E+01
 -3.0807503E+01 -3.0728117E+01 -3.0648972E+01 -3.0570065E+01
 -3.0491396E+01 -3.0412960E+01 -3.0334763E+01 -3.0256798E+01
 -3.0179066E+01 -3.0101568E+01 -3.0024303E+01 -2.9947268E+01
 -2.9870462E+01 -2.9793888E+01 -2.9717543E+01 -2.9641424E+01
 -2.9565535E+01 -2.9489872E+01 -2.9414434E+01 -2.9339222E+01
 -2.9264233E+01 -2.9189468E+01 -2.9114925E+01 -2.9040606E+01
 -2.8966507E+01 -2.8892628E+01 -2.8818970E+01 -2.8745529E+01
 -2.8672310E+01 -2.8599304E+01 -2.8526518E+01 -2.8453947E+01
 -2.8381590E+01 -2.8309450E+01 -2.8237522E+01 -2.8165808E+01
 -2.8094305E+01 -2.8023014E+01 -2.7951937E+01 -2.7881067E+01
 -2.7810408E+01 -2.7739958E+01 -2.7669716E+01 -2.7599680E+01
 -2.7529852E+01 -2.7460230E+01 -2.7390812E+01 -2.7321600E+01
 -2.7252590E+01 -2.7183784E+01 -2.7115183E+01 -2.7046783E+01
 -2.6978582E+01 -2.6910585E+01 -2.6842785E+01 -2.6775185E+01
 -2.6707785E+01 -2.6640579E+01 -2.6573574E+01 -2.6506765E+01
 -2.6440149E+01 -2.6373732E+01 -2.6307507E+01 -2.6241478E+01
 -2.6175642E+01 -2.6109997E+01 -2.6044544E+01 -2.5979284E+01
 -2.5914215E+01 -2.5849335E+01 -2.5784643E+01 -2.5720140E+01
 -2.5655827E+01 -2.5591703E+01 -2.5527763E+01 -2.5464010E+01
 -2.5400442E+01 -2.5337061E+01 -2.5273863E+01 -2.5210848E+01
 -2.5148018E+01 -2.5085369E+01 -2.5022903E+01 -2.4960617E+01
 -2.4898514E+01 -2.4836590E+01 -2.4774847E+01 -2.4713282E+01
 -2.4651894E+01 -2.4590685E+01 -2.4529654E+01 -2.4468800E+01
 -2.4408119E+01 -2.4347616E+01 -2.4287289E+01 -2.4227133E+01
 -2.4167152E+01 -2.4107346E+01 -2.4047710E+01 -2.3988249E+01
 -2.3928957E+01 -2.3869837E+01 -2.3810886E+01 -2.3752108E+01
 -2.3693495E+01 -2.3635054E+01 -2.3576778E+01 -2.3518673E+01
 -2.3460733E+01 -2.3402960E+01 -2.3345352E+01 -2.3287910E+01
 -2.3230633E+01 -2.3173521E+01 -2.3116571E+01 -2.3059786E+01
 -2.3003162E+01 -2.2946701E+01 -2.2890402E+01 -2.2834265E+01
 -2.2778286E+01 -2.2722469E+01 -2.2666811E+01 -2.2611311E+01
 -2.2555971E+01 -2.2500788E+01 -2.2445763E+01 -2.2390894E+01
 -2.2336182E+01 -2.2281626E+01 -2.2227224E+01 -2.2172979E+01
 -2.2118889E+01 -2.2064951E+01 -2.2011166E+01 -2.1957535E+01
 -2.1904057E+01 -2.1850729E+01 -2.1797554E+01 -2.1744530E+01
 -2.1691654E+01 -2.1638931E+01 -2.1586355E+01 -2.1533930E+01
 -2.1481653E+01 -2.1429523E+01 -2.1377541E+01 -2.1325706E+01
 -2.1274019E+01 -2.1222477E+01 -2.1171080E+01 -2.1119829E+01
 -2.1068722E+01 -2.1017759E+01 -2.0966940E+01 -2.0916265E+01
 -2.0865732E+01 -2.0815342E+01 -2.0765095E+01 -2.0714987E+01
 -2.0665022E+01 -2.0615196E+01 -2.0565512E+01 -2.0515966E+01
 -2.0466560E+01 -2.0417292E+01 -2.0368164E+01 -2.0319172E+01
 -2.0270317E+01 -2.0221601E+01 -2.0173021E+01 -2.0124577E+01
 -2.0076267E+01 -2.0028093E+01 -1.9980055E+01 -1.9932152E+01
 -1.9884380E+01 -1.9836744E+01 -1.9789240E+01 -1.9741869E+01
 -1.9694632E+01 -1.9647524E+01 -1.9600548E+01 -1.9553703E+01
 -1.9506990E+01 -1.9460405E+01 -1.9413952E+01 -1.9367628E+01
 -1.9321432E+01 -1.9275364E+01 -1.9229425E+01 -1.9183613E+01
 -1.9137930E+01 -1.9092371E+01 -1.9046940E+01 -1.9001635E+01
 -1.8956457E+01 -1.8911402E+01 -1.8866474E+01 -1.8821669E+01
 -1.8776989E+01 -1.8732431E+01 -1.8687998E+01 -1.8643688E+01
 -1.8599499E+01 -1.8555433E+01 -1.8511490E+01 -1.8467667E+01
 -1.8423965E+01 -1.8380384E+01 -1.8336922E+01 -1.8293581E+01
 -1.8250360E+01 -1.8207256E+01 -1.8164272E+01 -1.8121408E+01
 -1.8078659E+01 -1.8036030E+01 -1.7993517E+01 -1.7951122E+01
 -1.7908842E+01 -1.7866678E+01 -1.7824631E+01 -1.7782700E+01
 -1.7740883E+01 -1.7699181E+01 -1.7657593E+01 -1.7616117E+01
 -1.7574757E+01 -1.7533510E+01 -1.7492376E+01 -1.7451355E+01
 -1.7410444E+01 -1.7369646E+01 -1.7328960E+01 -1.7288385E+01
 -1.7247921E+01 -1.7207567E+01 -1.7167324E+01 -1.7127190E+01
 -1.7087166E+01 -1.7047249E+01 -1.7007442E+01 -1.6967745E+01
 -1.6928154E+01 -1.6888672E+01 -1.6849297E+01 -1.6810028E+01
 -1.6770866E+01 -1.6731812E+01 -1.6692863E+01 -1.6654020E+01
 -1.6615282E+01 -1.6576649E+01 -1.6538122E+01 -1.6499699E+01
 -1.6461378E+01 -1.6423162E+01 -1.6385050E+01 -1.6347042E+01
 -1.6309135E+01 -1.6271332E+01 -1.6233631E+01 -1.6196032E+01
 -1.6158533E+01 -1.6121136E+01 -1.6083839E+01 -1.6046644E+01
 -1.6009550E+01 -1.5972555E+01 -1.5935660E+01 -1.5898864E+01
 -1.5862167E+01 -1.5825569E+01 -1.5789070E+01 -1.5752668E+01
 -1.5716366E+01 -1.5680160E+01 -1.5644051E+01 -1.5608039E+01
 -1.5572124E+01 -1.5536305E+01 -1.5500584E+01 -1.5464956E+01
 -1.5429425E+01 -1.5393990E+01 -1.5358648E+01 -1.5323402E+01
 -1.5288250E+01 -1.5253192E+01 -1.5218227E+01 -1.5183356E+01
 -1.5148579E+01 -1.5113894E+01 -1.5079302E+01 -1.5044803E+01
 -1.5010394E+01 -1.4976078E+01 -1.4941854E+01 -1.4907721E+01
 -1.4873678E+01 -1.4839726E+01 -1.4805865E+01 -1.4772094E+01
 -1.4738413E+01 -1.4704821E+01 -1.4671318E+01 -1.4637905E+01
 -1.4604580E+01 -1.4571343E+01 -1.4538196E+01 -1.4505136E+01
 -1.4472163E+01 -1.4439279E+01 -1.4406480E+01 -1.4373769E+01
 -1.4341145E+01 -1.4308607E+01 -1.4276155E+01 -1.4243789E+01
 -1.4211508E+01 -1.4179313E+01 -1.4147203E+01 -1.4115177E+01
 -1.4083237E+01 -1.4051380E+01 -1.4019608E+01 -1.3987919E+01
 -1.3956314E+01 -1.3924792E+01 -1.3893353E+01 -1.3861998E+01
 -1.3830724E+01 -1.3799533E+01 -1.3768423E+01 -1.3737395E+01
 -1.3706450E+01 -1.3675585E+01 -1.3644802E+01 -1.3614099E+01
 -1.3583477E+01 -1.3552936E+01 -1.3522473E+01 -1.3492091E+01
 -1.3461789E+01 -1.3431566E+01 -1.3401423E+01 -1.3371358E+01
 -1.3341372E+01 -1.3311463E+01 -1.3281634E+01 -1.3251883E+01
 -1.3222209E+01 -1.3192613E+01 -1.3163093E+01 -1.3133651E+01
 -1.3104285E+01 -1.3074997E+01 -1.3045784E+01 -1.3016648E+01
 -1.2987588E+01 -1.2958603E+01 -1.2929693E+01 -1.2900860E+01
 -1.2872100E+01 -1.2843416E+01 -1.2814806E+01 -1.2786271E+01
 -1.2757810E+01 -1.2729422E+01 -1.2701108E+01 -1.2672868E+01
 -1.2644701E+01 -1.2616607E+01 -1.2588585E+01 -1.2560637E+01
 -1.2532760E+01 -1.2504955E+01 -1.2477223E+01 -1.2449563E+01
 -1.2421974E+01 -1.2394456E+01 -1.2367009E+01 -1.2339634E+01
 -1.2312328E+01 -1.2285094E+01 -1.2257930E+01 -1.2230835E+01
 -1.2203811E+01 -1.2176856E+01 -1.2149970E+01 -1.2123155E+01
 -1.2096407E+01 -1.2069729E+01 -1.2043119E+01 -1.2016578E+01
 -1.1990105E+01 -1.1963699E+01 -1.1937363E+01 -1.1911093E+01
 -1.1884891E+01 -1.1858756E+01 -1.1832687E+01 -1.1806686E+01
 -1.1780752E+01 -1.1754884E+01 -1.1729082E+01 -1.1703346E+01
 -1.1677676E+01 -1.1652072E+01 -1.1626534E+01 -1.1601060E+01
 -1.1575651E+01 -1.1550308E+01 -1.1525029E+01 -1.1499815E+01
 -1.1474665E+01 -1.1449579E+01 -1.1424558E+01 -1.1399599E+01
 -1.1374705E+01 -1.1349874E+01 -1.1325106E+01 -1.1300402E+01
 -1.1275760E+01 -1.1251180E+01 -1.1226663E+01 -1.1202209E+01
 -1.1177816E+01 -1.1153485E+01 -1.1129217E+01 -1.1105010E+01
 -1.1080864E+01 -1.1056780E+01 -1.1032756E+01 -1.1008794E+01
 -1.0984892E+01 -1.0961051E+01 -1.0937270E+01 -1.0913549E+01
 -1.0889888E+01 -1.0866287E+01 -1.0842746E+01 -1.0819264E+01
 -1.0795841E+01 -1.0772478E+01 -1.0749173E+01 -1.0725928E+01
 -1.0702741E+01 -1.0679612E+01 -1.0656542E+01 -1.0633530E+01
 -1.0610576E+01 -1.0587680E+01 -1.0564840E+01 -1.0542059E+01
 -1.0519335E+01 -1.0496668E+01 -1.0474058E+01 -1.0451506E+01
 -1.0429008E+01 -1.0406569E+01 -1.0384185E+01 -1.0361857E+01
 -1.0339586E+01 -1.0317370E+01 -1.0295210E+01 -1.0273106E+01
 -1.0251057E+01 -1.0229062E+01 -1.0207123E+01 -1.0185239E+01
 -1.0163410E+01 -1.0141635E+01 -1.0119914E+01 -1.0098248E+01
 -1.0076636E+01 -1.0055078E+01 -1.0033574E+01 -1.0012123E+01
 -9.9907255E+00 -9.9693813E+00 -9.9480906E+00 -9.9268532E+00
 -9.9056683E+00 -9.8845367E+00 -9.8634567E+00 -9.8424301E+00
 -9.8214550E+00 -9.8005323E+00 -9.7796621E+00 -9.7588434E+00
 -9.7380762E+00 -9.7173595E+00 -9.6966963E+00 -9.6760826E+00
 -9.6555214E+00 -9.6350098E+00 -9.6145496E+00 -9.5941401E+00
 -9.5737820E+00 -9.5534735E+00 -9.5332146E+00 -9.5130072E+00
 -9.4928484E+00 -9.4727402E+00 -9.4526815E+00 -9.4326715E+00
 -9.4127121E+00 -9.3928013E+00 -9.3729401E+00 -9.3531275E+00
 -9.3333645E+00 -9.3136492E+00 -9.2939835E+00 -9.2743654E+00
 -9.2547951E+00 -9.2352743E+00 -9.2158003E+00 -9.1963749E+00
 -9.1769972E+00 -9.1576672E+00 -9.1383848E+00 -9.1191492E+00
 -9.0999613E+00 -9.0808201E+00 -9.0617256E+00 -9.0426788E+00
 -9.0236778E+00 -9.0047245E+00 -8.9858170E+00 -8.9669552E+00
 -8.9481401E+00 -8.9293709E+00 -8.9106483E+00 -8.8919706E+00
 -8.8733397E+00 -8.8547525E+00 -8.8362122E+00 -8.8177166E+00
 -8.7992668E+00 -8.7808609E+00 -8.7625008E+00 -8.7441854E+00
 -8.7259140E+00 -8.7076874E+00 -8.6895056E+00 -8.6713676E+00
 -8.6532745E+00 -8.6352243E+00 -8.6172190E+00 -8.5992575E+00
 -8.5813389E+00 -8.5634642E+00 -8.5456333E+00 -8.5278454E+00
 -8.5101004E+00 -8.4923992E+00 -8.4747400E+00 -8.4571238E+00
 -8.4395504E+00 -8.4220200E+00 -8.4045315E+00 -8.3870859E+00
 -8.3696823E+00 -8.3523207E+00 -8.3350019E+00 -8.3177233E+00
 -8.3004885E+00 -8.2832937E+00 -8.2661409E+00 -8.2490301E+00
 -8.2319603E+00 -8.2149315E+00 -8.1979437E+00 -8.1809969E+00
 -8.1640911E+00 -8.1472263E+00 -8.1304016E+00 -8.1136179E+00
 -8.0968742E+00 -8.0801716E+00 -8.0635080E+00 -8.0468855E+00
 -8.0303020E+00 -8.0137596E+00 -7.9972558E+00 -7.9807920E+00
 -7.9643679E+00 -7.9479833E+00 -7.9316378E+00 -7.9153314E+00
 -7.8990645E+00 -7.8828363E+00 -7.8666468E+00 -7.8504963E+00
 -7.8343844E+00 -7.8183112E+00 -7.8022766E+00 -7.7862802E+00
 -7.7703218E+00 -7.7544017E+00 -7.7385197E+00 -7.7226758E+00
 -7.7068696E+00 -7.6911011E+00 -7.6753702E+00 -7.6596766E+00
 -7.6440206E+00 -7.6284022E+00 -7.6128206E+00 -7.5972762E+00
 -7.5817690E+00 -7.5662990E+00 -7.5508652E+00 -7.5354681E+00
 -7.5201082E+00 -7.5047846E+00 -7.4894972E+00 -7.4742460E+00
 -7.4590316E+00 -7.4438529E+00 -7.4287105E+00 -7.4136033E+00
 -7.3985329E+00 -7.3834977E+00 -7.3684978E+00 -7.3535342E+00
 -7.3386054E+00 -7.3237123E+00 -7.3088546E+00 -7.2940316E+00
 -7.2792439E+00 -7.2644911E+00 -7.2497735E+00 -7.2350907E+00
 -7.2204418E+00 -7.2058282E+00 -7.1912489E+00 -7.1767039E+00
 -7.1621933E+00 -7.1477170E+00 -7.1332746E+00 -7.1188664E+00
 -7.1044922E+00 -7.0901518E+00 -7.0758452E+00 -7.0615721E+00
 -7.0473328E+00 -7.0331268E+00 -7.0189543E+00 -7.0048151E+00
 -6.9907088E+00 -6.9766359E+00 -6.9625964E+00 -6.9485893E+00
 -6.9346151E+00 -6.9206738E+00 -6.9067655E+00 -6.8928895E+00
 -6.8790460E+00 -6.8652349E+00 -6.8514562E+00 -6.8377099E+00
 -6.8239956E+00 -6.8103137E+00 -6.7966633E+00 -6.7830448E+00
 -6.7694583E+00 -6.7559037E+00 -6.7423806E+00 -6.7288895E+00
 -6.7154293E+00 -6.7020006E+00 -6.6886034E+00 -6.6752372E+00
 -6.6619024E+00 -6.6485987E+00 -6.6353254E+00 -6.6220837E+00
 -6.6088724E+00 -6.5956922E+00 -6.5825424E+00 -6.5694232E+00
 -6.5563345E+00 -6.5432763E+00 -6.5302482E+00 -6.5172505E+00
 -6.5042834E+00 -6.4913459E+00 -6.4784384E+00 -6.4655609E+00
 -6.4527130E+00 -6.4398956E+00 -6.4271073E+00 -6.4143486E+00
 -6.4016199E+00 -6.3889203E+00 -6.3762503E+00 -6.3636093E+00
 -6.3509979E+00 -6.3384151E+00 -6.3258619E+00 -6.3133373E+00
 -6.3008418E+00 -6.2883754E+00 -6.2759376E+00 -6.2635283E+00
 -6.2511477E+00 -6.2387958E+00 -6.2264724E+00 -6.2141771E+00
 -6.2019100E+00 -6.1896715E+00 -6.1774611E+00 -6.1652789E+00
 -6.1531243E+00 -6.1409984E+00 -6.1288996E+00 -6.1168289E+00
 -6.1047859E+00 -6.0927706E+00 -6.0807829E+00 -6.0688229E+00
 -6.0568900E+00 -6.0449843E+00 -6.0331063E+00 -6.0212555E+00
 -6.0094318E+00 -5.9976349E+00 -5.9858651E+00 -5.9741225E+00
 -5.9624066E+00 -5.9507179E+00 -5.9390554E+00 -5.9274197E+00
 -5.9158106E+00 -5.9042282E+00 -5.8926716E+00 -5.8811421E+00
 -5.8696384E+00 -5.8581614E+00 -5.8467102E+00 -5.8352852E+00
 -5.8238864E+00 -5.8125134E+00 -5.8011665E+00 -5.7898455E+00
 -5.7785501E+00 -5.7672801E+00 -5.7560358E+00 -5.7448177E+00
 -5.7336245E+00 -5.7224569E+00 -5.7113147E+00 -5.7001977E+00
 -5.6891065E+00 -5.6780396E+00 -5.6669984E+00 -5.6559820E+00
 -5.6449904E+00 -5.6340241E+00 -5.6230826E+00 -5.6121659E+00
 -5.6012735E+00 -5.5904059E+00 -5.5795631E+00 -5.5687447E+00
 -5.5579510E+00 -5.5471816E+00 -5.5364361E+00 -5.5257154E+00
 -5.5150189E+00 -5.5043464E+00 -5.4936981E+00 -5.4830737E+00
 -5.4724731E+00 -5.4618964E+00 -5.4513435E+00 -5.4408150E+00
 -5.4303098E+00 -5.4198284E+00 -5.4093704E+00 -5.3989358E+00
 -5.3885250E+00 -5.3781376E+00 -5.3677731E+00 -5.3574324E+00
 -5.3471146E+00 -5.3368201E+00 -5.3265491E+00 -5.3163009E+00
 -5.3060756E+00 -5.2958732E+00 -5.2856936E+00 -5.2755370E+00
 -5.2654028E+00 -5.2552919E+00 -5.2452030E+00 -5.2351375E+00
 -5.2250938E+00 -5.2150731E+00 -5.2050743E+00 -5.1950984E+00
 -5.1851444E+00 -5.1752129E+00 -5.1653032E+00 -5.1554160E+00
 -5.1455507E+00 -5.1357074E+00 -5.1258864E+00 -5.1160870E+00
 -5.1063094E+00 -5.0965533E+00 -5.0868196E+00 -5.0771074E+00
 -5.0674167E+00 -5.0577474E+00 -5.0481000E+00 -5.0384736E+00
 -5.0288692E+00 -5.0192857E+00 -5.0097237E+00 -5.0001826E+00
 -4.9906631E+00 -4.9811649E+00 -4.9716873E+00 -4.9622312E+00
 -4.9527955E+00 -4.9433813E+00 -4.9339876E+00 -4.9246149E+00
 -4.9152627E+00 -4.9059315E+00 -4.8966208E+00 -4.8873305E+00
 -4.8780613E+00 -4.8688121E+00 -4.8595839E+00 -4.8503757E+00
 -4.8411880E+00 -4.8320203E+00 -4.8228731E+00 -4.8137465E+00
 -4.8046393E+00 -4.7955527E+00 -4.7864857E+00 -4.7774391E+00
 -4.7684121E+00 -4.7594051E+00 -4.7504182E+00 -4.7414508E+00
 -4.7325034E+00 -4.7235756E+00 -4.7146673E+00 -4.7057786E+00
 -4.6969099E+00 -4.6880603E+00 -4.6792302E+00 -4.6704192E+00
 -4.6616278E+00 -4.6528559E+00 -4.6441031E+00 -4.6353693E+00
 -4.6266551E+00 -4.6179600E+00 -4.6092834E+00 -4.6006260E+00
 -4.5919876E+00 -4.5833683E+00 -4.5747676E+00 -4.5661860E+00
 -4.5576234E+00 -4.5490789E+00 -4.5405536E+00 -4.5320463E+00
 -4.5235581E+00 -4.5150886E+00 -4.5066371E+00 -4.4982047E+00
 -4.4897900E+00 -4.4813938E+00 -4.4730163E+00 -4.4646568E+00
 -4.4563155E+00 -4.4479923E+00 -4.4396877E+00 -4.4314003E+00
 -4.4231319E+00 -4.4148812E+00 -4.4066482E+00 -4.3984332E+00
 -4.3902359E+00 -4.3820567E+00 -4.3738952E+00 -4.3657513E+00
 -4.3576255E+00 -4.3495169E+00 -4.3414259E+00 -4.3333526E+00
 -4.3252969E+00 -4.3172584E+00 -4.3092375E+00 -4.3012338E+00
 -4.2932477E+00 -4.2852788E+00 -4.2773271E+00 -4.2693930E+00
 -4.2614756E+00 -4.2535753E+00 -4.2456923E+00 -4.2378263E+00
 -4.2299771E+00 -4.2221451E+00 -4.2143302E+00 -4.2065315E+00
 -4.1987500E+00 -4.1909857E+00 -4.1832376E+00 -4.1755066E+00
 -4.1677918E+00 -4.1600938E+00 -4.1524124E+00 -4.1447477E+00
 -4.1370993E+00 -4.1294675E+00 -4.1218524E+00 -4.1142530E+00
 -4.1066704E+00 -4.0991039E+00 -4.0915537E+00 -4.0840201E+00
 -4.0765023E+00 -4.0690007E+00 -4.0615149E+00 -4.0540457E+00
 -4.0465922E+00 -4.0391545E+00 -4.0317330E+00 -4.0243273E+00
 -4.0169382E+00 -4.0095639E+00 -4.0022058E+00 -3.9948635E+00
 -3.9875367E+00 -3.9802258E+00 -3.9729304E+00 -3.9656508E+00
 -3.9583864E+00 -3.9511378E+00 -3.9439046E+00 -3.9366868E+00
 -3.9294846E+00 -3.9222975E+00 -3.9151261E+00 -3.9079695E+00
 -3.9008286E+00 -3.8937025E+00 -3.8865917E+00 -3.8794963E+00
 -3.8724158E+00 -3.8653505E+00 -3.8583000E+00 -3.8512647E+00
 -3.8442445E+00 -3.8372390E+00 -3.8302484E+00 -3.8232727E+00
 -3.8163118E+00 -3.8093657E+00 -3.8024342E+00 -3.7955174E+00
 -3.7886157E+00 -3.7817283E+00 -3.7748556E+00 -3.7679973E+00
 -3.7611537E+00 -3.7543244E+00 -3.7475100E+00 -3.7407098E+00
 -3.7339237E+00 -3.7271523E+00 -3.7203951E+00 -3.7136521E+00
 -3.7069235E+00 -3.7002089E+00 -3.6935089E+00 -3.6868227E+00
 -3.6801507E+00 -3.6734929E+00 -3.6668489E+00 -3.6602192E+00
 -3.6536036E+00 -3.6470015E+00 -3.6404135E+00 -3.6338396E+00
 -3.6272793E+00 -3.6207328E+00 -3.6142001E+00 -3.6076810E+00
 -3.6011760E+00 -3.5946844E+00 -3.5882065E+00 -3.5817423E+00
 -3.5752914E+00 -3.5688546E+00 -3.5624309E+00 -3.5560207E+00
 -3.5496240E+00 -3.5432408E+00 -3.5368707E+00 -3.5305142E+00
 -3.5241714E+00 -3.5178413E+00 -3.5115244E+00 -3.5052214E+00
 -3.4989309E+00 -3.4926541E+00 -3.4863901E+00 -3.4801393E+00
 -3.4739015E+00 -3.4676766E+00 -3.4614649E+00 -3.4552665E+00
 -3.4490805E+00 -3.4429078E+00 -3.4367478E+00 -3.4306006E+00
 -3.4244666E+00 -3.4183450E+00 -3.4122362E+00 -3.4061403E+00
 -3.4000571E+00 -3.3939862E+00 -3.3879282E+00 -3.3818829E+00
 -3.3758500E+00 -3.3698297E+00 -3.3638222E+00 -3.3578269E+00
 -3.3518443E+00 -3.3458738E+00 -3.3399160E+00 -3.3339703E+00
 -3.3280373E+00 -3.3221161E+00 -3.3162076E+00 -3.3103113E+00
 -3.3044271E+00 -3.2985551E+00 -3.2926955E+00 -3.2868478E+00
 -3.2810123E+00 -3.2751889E+00 -3.2693775E+00 -3.2635782E+00
 -3.2577910E+00 -3.2520156E+00 -3.2462521E+00 -3.2405005E+00
 -3.2347610E+00 -3.2290332E+00 -3.2233171E+00 -3.2176130E+00
 -3.2119207E+00 -3.2062399E+00 -3.2005713E+00 -3.1949141E+00
 -3.1892686E+00 -3.1836345E+00 -3.1780121E+00 -3.1724014E+00
 -3.1668022E+00 -3.1612148E+00 -3.1556385E+00 -3.1500738E+00
 -3.1445205E+00 -3.1389787E+00 -3.1334484E+00 -3.1279292E+00
 -3.1224215E+00 -3.1169250E+00 -3.1114399E+00 -3.1059661E+00
 -3.1005034E+00 -3.0950520E+00 -3.0896118E+00 -3.0841827E+00
 -3.0787647E+00 -3.0733578E+00 -3.0679619E+00 -3.0625772E+00
 -3.0572035E+00 -3.0518408E+00 -3.0464890E+00 -3.0411482E+00
 -3.0358183E+00 -3.0304995E+00 -3.0251913E+00 -3.0198939E+00
 -3.0146074E+00 -3.0093317E+00 -3.0040669E+00 -2.9988127E+00
 -2.9935691E+00 -2.9883366E+00 -2.9831145E+00 -2.9779029E+00
 -2.9727023E+00 -2.9675119E+00 -2.9623322E+00 -2.9571633E+00
 -2.9520047E+00 -2.9468565E+00 -2.9417191E+00 -2.9365919E+00
 -2.9314749E+00 -2.9263687E+00 -2.9212728E+00 -2.9161870E+00
 -2.9111118E+00 -2.9060469E+00 -2.9009919E+00 -2.8959475E+00
 -2.8909132E+00 -2.8858893E+00 -2.8808756E+00 -2.8758717E+00
 -2.8708782E+00 -2.8658948E+00 -2.8609211E+00 -2.8559580E+00
 -2.8510048E+00 -2.8460615E+00 -2.8411286E+00 -2.8362052E+00
 -2.8312917E+00 -2.8263886E+00 -2.8214951E+00 -2.8166115E+00
 -2.8117378E+00 -2.8068738E+00 -2.8020198E+00 -2.7971754E+00
 -2.7923408E+00 -2.7875161E+00 -2.7827010E+00 -2.7778957E+00
 -2.7730999E+00 -2.7683139E+00 -2.7635374E+00 -2.7587707E+00
 -2.7540138E+00 -2.7492659E+00 -2.7445281E+00 -2.7397995E+00
 -2.7350802E+00 -2.7303708E+00 -2.7256708E+00 -2.7209799E+00
 -2.7162988E+00 -2.7116270E+00 -2.7069645E+00 -2.7023113E+00
 -2.6976676E+00 -2.6930330E+00 -2.6884077E+00 -2.6837916E+00
 -2.6791849E+00 -2.6745875E+00 -2.6699994E+00 -2.6654203E+00
 -2.6608503E+00 -2.6562896E+00 -2.6517377E+00 -2.6471953E+00
 -2.6426618E+00 -2.6381373E+00 -2.6336217E+00 -2.6291156E+00
 -2.6246181E+00 -2.6201296E+00 -2.6156499E+00 -2.6111796E+00
 -2.6067178E+00 -2.6022649E+00 -2.5978212E+00 -2.5933862E+00
 -2.5889599E+00 -2.5845425E+00 -2.5801339E+00 -2.5757341E+00
 -2.5713429E+00 -2.5669608E+00 -2.5625870E+00 -2.5582221E+00
 -2.5538657E+00 -2.5495183E+00 -2.5451794E+00 -2.5408487E+00
 -2.5365269E+00 -2.5322137E+00 -2.5279093E+00 -2.5236130E+00
 -2.5193255E+00 -2.5150466E+00 -2.5107758E+00 -2.5065136E+00
 -2.5022597E+00 -2.4980145E+00 -2.4937775E+00 -2.4895492E+00
 -2.4853289E+00 -2.4811170E+00 -2.4769137E+00 -2.4727185E+00
 -2.4685314E+00 -2.4643528E+00 -2.4601824E+00 -2.4560204E+00
 -2.4518664E+00 -2.4477205E+00 -2.4435830E+00 -2.4394536E+00
 -2.4353323E+00 -2.4312191E+00 -2.4271140E+00 -2.4230173E+00
 -2.4189281E+00 -2.4148474E+00 -2.4107745E+00 -2.4067097E+00
 -2.4026530E+00 -2.3986042E+00 -2.3945632E+00 -2.3905303E+00
 -2.3865051E+00 -2.3824880E+00 -2.3784788E+00 -2.3744774E+00
 -2.3704839E+00 -2.3664982E+00 -2.3625205E+00 -2.3585503E+00
 -2.3545880E+00 -2.3506336E+00 -2.3466868E+00 -2.3427477E+00
 -2.3388164E+00 -2.3348927E+00 -2.3309767E+00 -2.3270686E+00
 -2.3231678E+00 -2.3192749E+00 -2.3153894E+00 -2.3115115E+00
 -2.3076413E+00 -2.3037786E+00 -2.2999234E+00 -2.2960758E+00
 -2.2922356E+00 -2.2884030E+00 -2.2845778E+00 -2.2807603E+00
 -2.2769499E+00 -2.2731471E+00 -2.2693517E+00 -2.2655637E+00
 -2.2617829E+00 -2.2580097E+00 -2.2542436E+00 -2.2504849E+00
 -2.2467337E+00 -2.2429898E+00 -2.2392530E+00 -2.2355235E+00
 -2.2318013E+00 -2.2280862E+00 -2.2243783E+00 -2.2206776E+00
 -2.2169843E+00 -2.2132981E+00 -2.2096188E+00 -2.2059469E+00
 -2.2022820E+00 -2.1986244E+00 -2.1949737E+00 -2.1913300E+00
 -2.1876934E+00 -2.1840639E+00 -2.1804414E+00 -2.1768260E+00
 -2.1732175E+00 -2.1696160E+00 -2.1660213E+00 -2.1624336E+00
 -2.1588531E+00 -2.1552792E+00 -2.1517124E+00 -2.1481524E+00
 -2.1445994E+00 -2.1410530E+00 -2.1375136E+00 -2.1339810E+00
 -2.1304553E+00 -2.1269362E+00 -2.1234241E+00 -2.1199186E+00
 -2.1164200E+00 -2.1129279E+00 -2.1094427E+00 -2.1059642E+00
 -2.1024923E+00 -2.0990272E+00 -2.0955687E+00 -2.0921168E+00
 -2.0886717E+00 -2.0852330E+00 -2.0818009E+00 -2.0783756E+00
 -2.0749567E+00 -2.0715444E+00 -2.0681386E+00 -2.0647395E+00
 -2.0613468E+00 -2.0579605E+00 -2.0545809E+00 -2.0512075E+00
 -2.0478408E+00 -2.0444806E+00 -2.0411265E+00 -2.0377791E+00
 -2.0344381E+00 -2.0311034E+00 -2.0277750E+00 -2.0244532E+00
 -2.0211375E+00 -2.0178282E+00 -2.0145252E+00 -2.0112286E+00
 -2.0079384E+00 -2.0046542E+00 -2.0013764E+00 -1.9981048E+00
 -1.9948395E+00 -1.9915804E+00 -1.9883275E+00 -1.9850808E+00
 -1.9818404E+00 -1.9786060E+00 -1.9753778E+00 -1.9721558E+00
 -1.9689399E+00 -1.9657301E+00 -1.9625263E+00 -1.9593288E+00
 -1.9561373E+00 -1.9529518E+00 -1.9497724E+00 -1.9465990E+00
 -1.9434316E+00 -1.9402703E+00 -1.9371150E+00 -1.9339657E+00
 -1.9308223E+00 -1.9276849E+00 -1.9245534E+00 -1.9214278E+00
 -1.9183083E+00 -1.9151945E+00 -1.9120867E+00 -1.9089848E+00
 -1.9058887E+00 -1.9027984E+00 -1.8997141E+00 -1.8966355E+00
 -1.8935628E+00 -1.8904959E+00 -1.8874348E+00 -1.8843795E+00
 -1.8813299E+00 -1.8782861E+00 -1.8752481E+00 -1.8722156E+00
 -1.8691890E+00 -1.8661681E+00 -1.8631530E+00 -1.8601434E+00
 -1.8571395E+00 -1.8541414E+00 -1.8511487E+00 -1.8481618E+00
 -1.8451805E+00 -1.8422048E+00 -1.8392347E+00 -1.8362702E+00
 -1.8333113E+00 -1.8303579E+00 -1.8274101E+00 -1.8244678E+00
 -1.8215311E+00 -1.8185997E+00 -1.8156739E+00 -1.8127537E+00
 -1.8098389E+00 -1.8069296E+00 -1.8040258E+00 -1.8011273E+00
 -1.7982343E+00 -1.7953467E+00 -1.7924646E+00 -1.7895879E+00
 -1.7867165E+00 -1.7838504E+00 -1.7809898E+00 -1.7781346E+00
 -1.7752845E+00 -1.7724400E+00 -1.7696006E+00 -1.7667667E+00
 -1.7639380E+00 -1.7611145E+00 -1.7582964E+00 -1.7554835E+00
 -1.7526758E+00 -1.7498734E+00 -1.7470762E+00 -1.7442843E+00
 -1.7414974E+00 -1.7387159E+00 -1.7359395E+00 -1.7331682E+00
 -1.7304022E+00 -1.7276413E+00 -1.7248856E+00 -1.7221348E+00
 -1.7193893E+00 -1.7166489E+00 -1.7139136E+00 -1.7111833E+00
 -1.7084582E+00 -1.7057381E+00 -1.7030230E+00 -1.7003130E+00
 -1.6976080E+00 -1.6949080E+00 -1.6922131E+00 -1.6895231E+00
 -1.6868382E+00 -1.6841581E+00 -1.6814830E+00 -1.6788130E+00
 -1.6761478E+00 -1.6734877E+00 -1.6708324E+00 -1.6681820E+00
 -1.6655365E+00 -1.6628959E+00 -1.6602603E+00 -1.6576295E+00
 -1.6550035E+00 -1.6523825E+00 -1.6497662E+00 -1.6471548E+00
 -1.6445482E+00 -1.6419463E+00 -1.6393493E+00 -1.6367573E+00
 -1.6341698E+00 -1.6315871E+00 -1.6290092E+00 -1.6264361E+00
 -1.6238678E+00 -1.6213040E+00 -1.6187451E+00 -1.6161909E+00
 -1.6136414E+00 -1.6110965E+00 -1.6085564E+00 -1.6060208E+00
 -1.6034900E+00 -1.6009638E+00 -1.5984423E+00 -1.5959255E+00
 -1.5934131E+00 -1.5909054E+00 -1.5884024E+00 -1.5859040E+00
 -1.5834100E+00 -1.5809207E+00 -1.5784360E+00 -1.5759557E+00
 -1.5734801E+00 -1.5710090E+00 -1.5685425E+00 -1.5660805E+00
 -1.5636228E+00 -1.5611697E+00 -1.5587212E+00 -1.5562772E+00
 -1.5538374E+00 -1.5514023E+00 -1.5489717E+00 -1.5465453E+00
 -1.5441235E+00 -1.5417061E+00 -1.5392931E+00 -1.5368845E+00
 -1.5344803E+00 -1.5320805E+00 -1.5296850E+00 -1.5272939E+00
 -1.5249072E+00 -1.5225250E+00 -1.5201468E+00 -1.5177733E+00
 -1.5154039E+00 -1.5130388E+00 -1.5106781E+00 -1.5083216E+00
 -1.5059695E+00 -1.5036216E+00 -1.5012779E+00 -1.4989387E+00
 -1.4966035E+00 -1.4942727E+00 -1.4919461E+00 -1.4896237E+00
 -1.4873055E+00 -1.4849916E+00 -1.4826818E+00 -1.4803761E+00
 -1.4780748E+00 -1.4757775E+00 -1.4734844E+00 -1.4711956E+00
 -1.4689108E+00 -1.4666302E+00 -1.4643537E+00 -1.4620813E+00
 -1.4598130E+00 -1.4575489E+00 -1.4552888E+00 -1.4530329E+00
 -1.4507810E+00 -1.4485332E+00 -1.4462894E+00 -1.4440497E+00
 -1.4418141E+00 -1.4395823E+00 -1.4373548E+00 -1.4351312E+00
 -1.4329116E+00 -1.4306961E+00 -1.4284846E+00 -1.4262770E+00
 -1.4240735E+00 -1.4218738E+00 -1.4196781E+00 -1.4174864E+00
 -1.4152987E+00 -1.4131148E+00 -1.4109349E+00 -1.4087590E+00
 -1.4065869E+00 -1.4044187E+00 -1.4022545E+00 -1.4000942E+00
 -1.3979377E+00 -1.3957851E+00 -1.3936363E+00 -1.3914914E+00
 -1.3893504E+00 -1.3872132E+00 -1.3850799E+00 -1.3829503E+00
 -1.3808247E+00 -1.3787028E+00 -1.3765846E+00 -1.3744704E+00
 -1.3723599E+00 -1.3702531E+00 -1.3681501E+00 -1.3660510E+00
 -1.3639555E+00 -1.3618639E+00 -1.3597759E+00 -1.3576916E+00
 -1.3556112E+00 -1.3535345E+00 -1.3514613E+00 -1.3493921E+00
 -1.3473264E+00 -1.3452643E+00 -1.3432060E+00 -1.3411515E+00
 -1.3391005E+00 -1.3370532E+00 -1.3350096E+00 -1.3329695E+00
 -1.3309332E+00 -1.3289005E+00 -1.3268714E+00 -1.3248459E+00
 -1.3228240E+00 -1.3208057E+00 -1.3187910E+00 -1.3167799E+00
 -1.3147724E+00 -1.3127683E+00 -1.3107680E+00 -1.3087711E+00
 -1.3067777E+00 -1.3047880E+00 -1.3028017E+00 -1.3008190E+00
 -1.2988399E+00 -1.2968643E+00 -1.2948921E+00 -1.2929235E+00
 -1.2909582E+00 -1.2889966E+00 -1.2870383E+00 -1.2850835E+00
 -1.2831323E+00 -1.2811844E+00 -1.2792401E+00 -1.2772992E+00
 -1.2753617E+00 -1.2734276E+00 -1.2714969E+00 -1.2695696E+00
 -1.2676458E+00 -1.2657254E+00 -1.2638084E+00 -1.2618947E+00
 -1.2599844E+00 -1.2580775E+00 -1.2561740E+00 -1.2542738E+00
 -1.2523770E+00 -1.2504835E+00 -1.2485933E+00 -1.2467066E+00
 -1.2448231E+00 -1.2429429E+00 -1.2410661E+00 -1.2391926E+00
 -1.2373223E+00 -1.2354554E+00 -1.2335917E+00 -1.2317313E+00
 -1.2298741E+00 -1.2280203E+00 -1.2261697E+00 -1.2243224E+00
 -1.2224783E+00 -1.2206374E+00 -1.2187998E+00 -1.2169654E+00
 -1.2151343E+00 -1.2133063E+00 -1.2114816E+00 -1.2096601E+00
 -1.2078416E+00 -1.2060266E+00 -1.2042146E+00 -1.2024057E+00
 -1.2006000E+00 -1.1987976E+00 -1.1969982E+00 -1.1952021E+00
 -1.1934091E+00 -1.1916192E+00 -1.1898324E+00 -1.1880488E+00
 -1.1862683E+00 -1.1844909E+00 -1.1827166E+00 -1.1809454E+00
 -1.1791773E+00 -1.1774123E+00 -1.1756504E+00 -1.1738914E+00
 -1.1721357E+00 -1.1703830E+00 -1.1686333E+00 -1.1668867E+00
 -1.1651431E+00 -1.1634026E+00 -1.1616651E+00 -1.1599306E+00
 -1.1581992E+00 -1.1564707E+00 -1.1547452E+00 -1.1530229E+00
 -1.1513034E+00 -1.1495869E+00 -1.1478735E+00 -1.1461630E+00
 -1.1444556E+00 -1.1427510E+00 -1.1410494E+00 -1.1393508E+00
 -1.1376551E+00 -1.1359624E+00 -1.1342726E+00 -1.1325858E+00
 -1.1309018E+00 -1.1292208E+00 -1.1275427E+00 -1.1258675E+00
 -1.1241952E+00 -1.1225258E+00 -1.1208594E+00 -1.1191957E+00
 -1.1175350E+00 -1.1158772E+00 -1.1142222E+00 -1.1125700E+00
 -1.1109208E+00 -1.1092743E+00 -1.1076307E+00 -1.1059901E+00
 -1.1043521E+00 -1.1027170E+00 -1.1010848E+00 -1.0994554E+00
 -1.0978287E+00 -1.0962050E+00 -1.0945840E+00 -1.0929657E+00
 -1.0913503E+00 -1.0897377E+00 -1.0881279E+00 -1.0865208E+00
 -1.0849165E+00 -1.0833149E+00 -1.0817161E+00 -1.0801201E+00
 -1.0785267E+00 -1.0769362E+00 -1.0753484E+00 -1.0737634E+00
 -1.0721810E+00 -1.0706013E+00 -1.0690244E+00 -1.0674502E+00
 -1.0658786E+00 -1.0643098E+00 -1.0627438E+00 -1.0611804E+00
 -1.0596195E+00 -1.0580615E+00 -1.0565060E+00 -1.0549533E+00
 -1.0534033E+00 -1.0518558E+00 -1.0503111E+00 -1.0487690E+00
 -1.0472295E+00 -1.0456927E+00 -1.0441585E+00 -1.0426269E+00
 -1.0410979E+00 -1.0395715E+00 -1.0380478E+00 -1.0365267E+00
 -1.0350081E+00 -1.0334922E+00 -1.0319788E+00 -1.0304681E+00
 -1.0289599E+00 -1.0274543E+00 -1.0259513E+00 -1.0244508E+00
 -1.0229528E+00 -1.0214574E+00 -1.0199647E+00 -1.0184743E+00
 -1.0169867E+00 -1.0155015E+00 -1.0140188E+00 -1.0125387E+00
 -1.0110611E+00 -1.0095860E+00 -1.0081134E+00 -1.0066433E+00
 -1.0051757E+00 -1.0037106E+00 -1.0022480E+00 -1.0007879E+00
 -9.9933022E-01 -9.9787509E-01 -9.9642241E-01 -9.9497217E-01
 -9.9352443E-01 -9.9207908E-01 -9.9063629E-01 -9.8919582E-01
 -9.8775792E-01 -9.8632240E-01 -9.8488933E-01 -9.8345864E-01
 -9.8203039E-01 -9.8060459E-01 -9.7918117E-01 -9.7776020E-01
 -9.7634161E-01 -9.7492540E-01 -9.7351164E-01 -9.7210026E-01
 -9.7069120E-01 -9.6928459E-01 -9.6788037E-01 -9.6647847E-01
 -9.6507895E-01 -9.6368182E-01 -9.6228701E-01 -9.6089458E-01
 -9.5950449E-01 -9.5811677E-01 -9.5673138E-01 -9.5534831E-01
 -9.5396757E-01 -9.5258921E-01 -9.5121312E-01 -9.4983935E-01
 -9.4846791E-01 -9.4709879E-01 -9.4573194E-01 -9.4436741E-01
 -9.4300520E-01 -9.4164526E-01 -9.4028759E-01 -9.3893224E-01
 -9.3757915E-01 -9.3622833E-01 -9.3487978E-01 -9.3353349E-01
 -9.3218946E-01 -9.3084770E-01 -9.2950821E-01 -9.2817098E-01
 -9.2683595E-01 -9.2550313E-01 -9.2417258E-01 -9.2284429E-01
 -9.2151821E-01 -9.2019433E-01 -9.1887271E-01 -9.1755325E-01
 -9.1623604E-01 -9.1492105E-01 -9.1360825E-01 -9.1229761E-01
 -9.1098922E-01 -9.0968293E-01 -9.0837890E-01 -9.0707707E-01
 -9.0577734E-01 -9.0447980E-01 -9.0318447E-01 -9.0189129E-01
 -9.0060025E-01 -8.9931136E-01 -8.9802468E-01 -8.9674008E-01
 -8.9545763E-01 -8.9417738E-01 -8.9289922E-01 -8.9162320E-01
 -8.9034927E-01 -8.8907748E-01 -8.8780785E-01 -8.8654029E-01
 -8.8527489E-01 -8.8401157E-01 -8.8275033E-01 -8.8149118E-01
 -8.8023418E-01 -8.7897927E-01 -8.7772638E-01 -8.7647563E-01
 -8.7522697E-01 -8.7398034E-01 -8.7273580E-01 -8.7149328E-01
 -8.7025291E-01 -8.6901456E-01 -8.6777824E-01 -8.6654401E-01
 -8.6531180E-01 -8.6408162E-01 -8.6285353E-01 -8.6162746E-01
 -8.6040342E-01 -8.5918140E-01 -8.5796136E-01 -8.5674340E-01
 -8.5552746E-01 -8.5431349E-01 -8.5310155E-01 -8.5189164E-01
 -8.5068375E-01 -8.4947777E-01 -8.4827387E-01 -8.4707189E-01
 -8.4587193E-01 -8.4467399E-01 -8.4347796E-01 -8.4228396E-01
 -8.4109187E-01 -8.3990180E-01 -8.3871371E-01 -8.3752751E-01
 -8.3634335E-01 -8.3516109E-01 -8.3398080E-01 -8.3280241E-01
 -8.3162600E-01 -8.3045155E-01 -8.2927901E-01 -8.2810837E-01
 -8.2693970E-01 -8.2577294E-01 -8.2460809E-01 -8.2344520E-01
 -8.2228416E-01 -8.2112509E-01 -8.1996787E-01 -8.1881261E-01
 -8.1765920E-01 -8.1650770E-01 -8.1535810E-01 -8.1421036E-01
 -8.1306458E-01 -8.1192058E-01 -8.1077850E-01 -8.0963832E-01
 -8.0849999E-01 -8.0736351E-01 -8.0622894E-01 -8.0509615E-01
 -8.0396527E-01 -8.0283624E-01 -8.0170906E-01 -8.0058372E-01
 -7.9946023E-01 -7.9833859E-01 -7.9721880E-01 -7.9610080E-01
 -7.9498464E-01 -7.9387027E-01 -7.9275775E-01 -7.9164708E-01
 -7.9053819E-01 -7.8943115E-01 -7.8832585E-01 -7.8722245E-01
 -7.8612077E-01 -7.8502095E-01 -7.8392285E-01 -7.8282660E-01
 -7.8173214E-01 -7.8063941E-01 -7.7954853E-01 -7.7845937E-01
 -7.7737200E-01 -7.7628642E-01 -7.7520257E-01 -7.7412057E-01
 -7.7304024E-01 -7.7196175E-01 -7.7088493E-01 -7.6980990E-01
 -7.6873660E-01 -7.6766509E-01 -7.6659530E-01 -7.6552725E-01
 -7.6446092E-01 -7.6339632E-01 -7.6233351E-01 -7.6127237E-01
 -7.6021296E-01 -7.5915527E-01 -7.5809932E-01 -7.5704503E-01
 -7.5599247E-01 -7.5494164E-01 -7.5389254E-01 -7.5284505E-01
 -7.5179935E-01 -7.5075531E-01 -7.4971294E-01 -7.4867225E-01
 -7.4763328E-01 -7.4659598E-01 -7.4556035E-01 -7.4452645E-01
 -7.4349415E-01 -7.4246353E-01 -7.4143463E-01 -7.4040735E-01
 -7.3938173E-01 -7.3835778E-01 -7.3733550E-01 -7.3631483E-01
 -7.3529583E-01 -7.3427844E-01 -7.3326278E-01 -7.3224866E-01
 -7.3123622E-01 -7.3022544E-01 -7.2921622E-01 -7.2820866E-01
 -7.2720277E-01 -7.2619843E-01 -7.2519577E-01 -7.2419465E-01
 -7.2319520E-01 -7.2219735E-01 -7.2120112E-01 -7.2020650E-01
 -7.1921343E-01 -7.1822196E-01 -7.1723211E-01 -7.1624386E-01
 -7.1525717E-01 -7.1427208E-01 -7.1328855E-01 -7.1230668E-01
 -7.1132630E-01 -7.1034753E-01 -7.0937032E-01 -7.0839465E-01
 -7.0742065E-01 -7.0644808E-01 -7.0547718E-01 -7.0450777E-01
 -7.0353991E-01 -7.0257360E-01 -7.0160890E-01 -7.0064569E-01
 -6.9968402E-01 -6.9872391E-01 -6.9776535E-01 -6.9680828E-01
 -6.9585276E-01 -6.9489878E-01 -6.9394630E-01 -6.9299543E-01
 -6.9204599E-01 -6.9109809E-01 -6.9015169E-01 -6.8920684E-01
 -6.8826348E-01 -6.8732160E-01 -6.8638122E-01 -6.8544239E-01
 -6.8450505E-01 -6.8356919E-01 -6.8263477E-01 -6.8170190E-01
 -6.8077052E-01 -6.7984062E-01 -6.7891222E-01 -6.7798525E-01
 -6.7705977E-01 -6.7613578E-01 -6.7521328E-01 -6.7429215E-01
 -6.7337263E-01 -6.7245448E-01 -6.7153782E-01 -6.7062259E-01
 -6.6970885E-01 -6.6879654E-01 -6.6788566E-01 -6.6697627E-01
 -6.6606826E-01 -6.6516173E-01 -6.6425669E-01 -6.6335303E-01
 -6.6245085E-01 -6.6155005E-01 -6.6065067E-01 -6.5975273E-01
 -6.5885627E-01 -6.5796113E-01 -6.5706748E-01 -6.5617526E-01
 -6.5528440E-01 -6.5439498E-01 -6.5350699E-01 -6.5262038E-01
 -6.5173513E-01 -6.5085131E-01 -6.4996892E-01 -6.4908791E-01
 -6.4820832E-01 -6.4733005E-01 -6.4645320E-01 -6.4557773E-01
 -6.4470369E-01 -6.4383096E-01 -6.4295965E-01 -6.4208972E-01
 -6.4122117E-01 -6.4035398E-01 -6.3948810E-01 -6.3862365E-01
 -6.3776058E-01 -6.3689882E-01 -6.3603842E-01 -6.3517940E-01
 -6.3432175E-01 -6.3346541E-01 -6.3261044E-01 -6.3175678E-01
 -6.3090450E-01 -6.3005358E-01 -6.2920398E-01 -6.2835568E-01
 -6.2750876E-01 -6.2666315E-01 -6.2581885E-01 -6.2497592E-01
 -6.2413430E-01 -6.2329400E-01 -6.2245500E-01 -6.2161738E-01
 -6.2078100E-01 -6.1994600E-01 -6.1911225E-01 -6.1827981E-01
 -6.1744875E-01 -6.1661887E-01 -6.1579043E-01 -6.1496317E-01
 -6.1413729E-01 -6.1331266E-01 -6.1248934E-01 -6.1166728E-01
 -6.1084652E-01 -6.1002707E-01 -6.0920882E-01 -6.0839194E-01
 -6.0757631E-01 -6.0676199E-01 -6.0594893E-01 -6.0513705E-01
 -6.0432655E-01 -6.0351723E-01 -6.0270923E-01 -6.0190248E-01
 -6.0109699E-01 -6.0029280E-01 -5.9948981E-01 -5.9868807E-01
 -5.9788758E-01 -5.9708840E-01 -5.9629041E-01 -5.9549367E-01
 -5.9469819E-01 -5.9390390E-01 -5.9311092E-01 -5.9231907E-01
 -5.9152853E-01 -5.9073925E-01 -5.8995116E-01 -5.8916432E-01
 -5.8837867E-01 -5.8759421E-01 -5.8681101E-01 -5.8602905E-01
 -5.8524829E-01 -5.8446872E-01 -5.8369040E-01 -5.8291328E-01
 -5.8213735E-01 -5.8136261E-01 -5.8058912E-01 -5.7981682E-01
 -5.7904565E-01 -5.7827574E-01 -5.7750702E-01 -5.7673949E-01
 -5.7597315E-01 -5.7520795E-01 -5.7444400E-01 -5.7368124E-01
 -5.7291961E-01 -5.7215917E-01 -5.7139993E-01 -5.7064188E-01
 -5.6988496E-01 -5.6912923E-01 -5.6837463E-01 -5.6762123E-01
 -5.6686902E-01 -5.6611794E-01 -5.6536806E-01 -5.6461930E-01
 -5.6387168E-01 -5.6312525E-01 -5.6237996E-01 -5.6163585E-01
 -5.6089288E-01 -5.6015104E-01 -5.5941033E-01 -5.5867076E-01
 -5.5793238E-01 -5.5719513E-01 -5.5645895E-01 -5.5572397E-01
 -5.5499005E-01 -5.5425733E-01 -5.5352575E-01 -5.5279523E-01
 -5.5206585E-01 -5.5133766E-01 -5.5061054E-01 -5.4988450E-01
 -5.4915965E-01 -5.4843587E-01 -5.4771322E-01 -5.4699165E-01
 -5.4627120E-01 -5.4555190E-01 -5.4483366E-01 -5.4411656E-01
 -5.4340053E-01 -5.4268563E-01 -5.4197180E-01 -5.4125905E-01
 -5.4054743E-01 -5.3983688E-01 -5.3912741E-01 -5.3841907E-01
 -5.3771180E-01 -5.3700560E-01 -5.3630042E-01 -5.3559637E-01
 -5.3489345E-01 -5.3419155E-01 -5.3349078E-01 -5.3279102E-01
 -5.3209233E-01 -5.3139478E-01 -5.3069824E-01 -5.3000277E-01
 -5.2930838E-01 -5.2861500E-01 -5.2792275E-01 -5.2723151E-01
 -5.2654135E-01 -5.2585220E-01 -5.2516419E-01 -5.2447712E-01
 -5.2379119E-01 -5.2310628E-01 -5.2242237E-01 -5.2173960E-01
 -5.2105778E-01 -5.2037704E-01 -5.1969731E-01 -5.1901865E-01
 -5.1834100E-01 -5.1766437E-01 -5.1698881E-01 -5.1631427E-01
 -5.1564074E-01 -5.1496822E-01 -5.1429677E-01 -5.1362628E-01
 -5.1295686E-01 -5.1228845E-01 -5.1162100E-01 -5.1095462E-01
 -5.1028925E-01 -5.0962490E-01 -5.0896150E-01 -5.0829917E-01
 -5.0763780E-01 -5.0697750E-01 -5.0631815E-01 -5.0565982E-01
 -5.0500250E-01 -5.0434613E-01 -5.0369078E-01 -5.0303644E-01
 -5.0238305E-01 -5.0173068E-01 -5.0107932E-01 -5.0042892E-01
 -4.9977946E-01 -4.9913105E-01 -4.9848360E-01 -4.9783713E-01
 -4.9719164E-01 -4.9654710E-01 -4.9590358E-01 -4.9526101E-01
 -4.9461940E-01 -4.9397877E-01 -4.9333909E-01 -4.9270043E-01
 -4.9206269E-01 -4.9142593E-01 -4.9079010E-01 -4.9015525E-01
 -4.8952138E-01 -4.8888841E-01 -4.8825645E-01 -4.8762542E-01
 -4.8699534E-01 -4.8636621E-01 -4.8573804E-01 -4.8511082E-01
 -4.8448452E-01 -4.8385921E-01 -4.8323479E-01 -4.8261133E-01
 -4.8198879E-01 -4.8136723E-01 -4.8074657E-01 -4.8012686E-01
 -4.7950807E-01 -4.7889021E-01 -4.7827327E-01 -4.7765729E-01
 -4.7704220E-01 -4.7642806E-01 -4.7581482E-01 -4.7520253E-01
 -4.7459114E-01 -4.7398064E-01 -4.7337109E-01 -4.7276244E-01
 -4.7215474E-01 -4.7154790E-01 -4.7094199E-01 -4.7033700E-01
 -4.6973291E-01 -4.6912971E-01 -4.6852744E-01 -4.6792606E-01
 -4.6732557E-01 -4.6672598E-01 -4.6612731E-01 -4.6552950E-01
 -4.6493262E-01 -4.6433660E-01 -4.6374151E-01 -4.6314728E-01
 -4.6255395E-01 -4.6196151E-01 -4.6136993E-01 -4.6077925E-01
 -4.6018946E-01 -4.5960054E-01 -4.5901251E-01 -4.5842531E-01
 -4.5783904E-01 -4.5725366E-01 -4.5666909E-01 -4.5608544E-01
 -4.5550266E-01 -4.5492074E-01 -4.5433965E-01 -4.5375946E-01
 -4.5318016E-01 -4.5260167E-01 -4.5202407E-01 -4.5144734E-01
 -4.5087144E-01 -4.5029640E-01 -4.4972223E-01 -4.4914889E-01
 -4.4857645E-01 -4.4800481E-01 -4.4743404E-01 -4.4686416E-01
 -4.4629508E-01 -4.4572684E-01 -4.4515944E-01 -4.4459292E-01
 -4.4402722E-01 -4.4346234E-01 -4.4289833E-01 -4.4233516E-01
 -4.4177279E-01 -4.4121128E-01 -4.4065061E-01 -4.4009075E-01
 -4.3953171E-01 -4.3897352E-01 -4.3841618E-01 -4.3785962E-01
 -4.3730390E-01 -4.3674901E-01 -4.3619493E-01 -4.3564168E-01
 -4.3508926E-01 -4.3453762E-01 -4.3398681E-01 -4.3343681E-01
 -4.3288764E-01 -4.3233931E-01 -4.3179175E-01 -4.3124500E-01
 -4.3069905E-01 -4.3015394E-01 -4.2960960E-01 -4.2906606E-01
 -4.2852336E-01 -4.2798144E-01 -4.2744032E-01 -4.2690000E-01
 -4.2636049E-01 -4.2582172E-01 -4.2528379E-01 -4.2474666E-01
 -4.2421031E-01 -4.2367476E-01 -4.2313999E-01 -4.2260596E-01
 -4.2207277E-01 -4.2154038E-01 -4.2100874E-01 -4.2047787E-01
 -4.1994780E-01 -4.1941851E-01 -4.1889000E-01 -4.1836229E-01
 -4.1783533E-01 -4.1730914E-01 -4.1678372E-01 -4.1625908E-01
 -4.1573519E-01 -4.1521209E-01 -4.1468978E-01 -4.1416821E-01
 -4.1364741E-01 -4.1312736E-01 -4.1260809E-01 -4.1208959E-01
 -4.1157183E-01 -4.1105482E-01 -4.1053858E-01 -4.1002309E-01
 -4.0950838E-01 -4.0899441E-01 -4.0848118E-01 -4.0796870E-01
 -4.0745696E-01 -4.0694603E-01 -4.0643579E-01 -4.0592632E-01
 -4.0541756E-01 -4.0490961E-01 -4.0440235E-01 -4.0389585E-01
 -4.0339008E-01 -4.0288505E-01 -4.0238076E-01 -4.0187719E-01
 -4.0137440E-01 -4.0087229E-01 -4.0037096E-01 -3.9987034E-01
 -3.9937046E-01 -3.9887127E-01 -3.9837286E-01 -3.9787516E-01
 -3.9737815E-01 -3.9688191E-01 -3.9638638E-01 -3.9589155E-01
 -3.9539748E-01 -3.9490411E-01 -3.9441141E-01 -3.9391950E-01
 -3.9342827E-01 -3.9293778E-01 -3.9244798E-01 -3.9195889E-01
 -3.9147052E-01 -3.9098284E-01 -3.9049590E-01 -3.9000964E-01
 -3.8952413E-01 -3.8903928E-01 -3.8855514E-01 -3.8807172E-01
 -3.8758901E-01 -3.8710698E-01 -3.8662565E-01 -3.8614503E-01
 -3.8566509E-01 -3.8518584E-01 -3.8470730E-01 -3.8422945E-01
 -3.8375229E-01 -3.8327584E-01 -3.8280007E-01 -3.8232496E-01
 -3.8185057E-01 -3.8137686E-01 -3.8090384E-01 -3.8043150E-01
 -3.7995985E-01 -3.7948889E-01 -3.7901857E-01 -3.7854898E-01
 -3.7808001E-01 -3.7761179E-01 -3.7714419E-01 -3.7667727E-01
 -3.7621105E-01 -3.7574548E-01 -3.7528059E-01 -3.7481639E-01
 -3.7435281E-01 -3.7388995E-01 -3.7342775E-01 -3.7296620E-01
 -3.7250534E-01 -3.7204510E-01 -3.7158555E-01 -3.7112668E-01
 -3.7066844E-01 -3.7021089E-01 -3.6975396E-01 -3.6929771E-01
 -3.6884212E-01 -3.6838716E-01 -3.6793289E-01 -3.6747926E-01
 -3.6702627E-01 -3.6657396E-01 -3.6612228E-01 -3.6567125E-01
 -3.6522087E-01 -3.6477113E-01 -3.6432204E-01 -3.6387360E-01
 -3.6342579E-01 -3.6297864E-01 -3.6253214E-01 -3.6208627E-01
 -3.6164102E-01 -3.6119643E-01 -3.6075246E-01 -3.6030915E-01
 -3.5986647E-01 -3.5942441E-01 -3.5898301E-01 -3.5854223E-01
 -3.5810205E-01 -3.5766256E-01 -3.5722366E-01 -3.5678539E-01
 -3.5634774E-01 -3.5591072E-01 -3.5547432E-01 -3.5503858E-01
 -3.5460344E-01 -3.5416892E-01 -3.5373503E-01 -3.5330176E-01
 -3.5286906E-01 -3.5243705E-01 -3.5200563E-01 -3.5157481E-01
 -3.5114461E-01 -3.5071504E-01 -3.5028607E-01 -3.4985772E-01
 -3.4942997E-01 -3.4900284E-01 -3.4857634E-01 -3.4815040E-01
 -3.4772509E-01 -3.4730041E-01 -3.4687629E-01 -3.4645280E-01
 -3.4602994E-01 -3.4560764E-01 -3.4518594E-01 -3.4476486E-01
 -3.4434438E-01 -3.4392446E-01 -3.4350517E-01 -3.4308651E-01
 -3.4266838E-01 -3.4225088E-01 -3.4183398E-01 -3.4141764E-01
 -3.4100193E-01 -3.4058678E-01 -3.4017223E-01 -3.3975828E-01
 -3.3934489E-01 -3.3893210E-01 -3.3851990E-01 -3.3810830E-01
 -3.3769724E-01 -3.3728680E-01 -3.3687696E-01 -3.3646765E-01
 -3.3605894E-01 -3.3565083E-01 -3.3524328E-01 -3.3483630E-01
 -3.3442989E-01 -3.3402407E-01 -3.3361885E-01 -3.3321416E-01
 -3.3281007E-01 -3.3240655E-01 -3.3200356E-01 -3.3160120E-01
 -3.3119938E-01 -3.3079812E-01 -3.3039746E-01 -3.2999733E-01
 -3.2959777E-01 -3.2919878E-01 -3.2880035E-01 -3.2840249E-01
 -3.2800519E-01 -3.2760844E-01 -3.2721227E-01 -3.2681665E-01
 -3.2642159E-01 -3.2602707E-01 -3.2563314E-01 -3.2523972E-01
 -3.2484689E-01 -3.2445461E-01 -3.2406288E-01 -3.2367167E-01
 -3.2328105E-01 -3.2289097E-01 -3.2250142E-01 -3.2211244E-01
 -3.2172400E-01 -3.2133612E-01 -3.2094878E-01 -3.2056198E-01
 -3.2017574E-01 -3.1979001E-01 -3.1940481E-01 -3.1902021E-01
 -3.1863609E-01 -3.1825256E-01 -3.1786951E-01 -3.1748706E-01
 -3.1710511E-01 -3.1672373E-01 -3.1634286E-01 -3.1596252E-01
 -3.1558272E-01 -3.1520346E-01 -3.1482470E-01 -3.1444651E-01
 -3.1406882E-01 -3.1369168E-01 -3.1331506E-01 -3.1293899E-01
 -3.1256339E-01 -3.1218839E-01 -3.1181386E-01 -3.1143987E-01
  1.0974264E+04  2.1847490E+04  3.2620381E+04  4.3293625E+04
  5.3867914E+04  6.4343930E+04  7.4722359E+04  8.5003867E+04
  9.5189141E+04  1.0527884E+05  1.1527363E+05  1.2517416E+05
  1.3498111E+05  1.4469512E+05  1.5431683E+05  1.6384689E+05
  1.7328594E+05  1.8263462E+05  1.9189356E+05  2.0106338E+05
  2.1014472E+05  2.1913819E+05  2.2804439E+05  2.3686397E+05
  2.4559750E+05  2.5424562E+05  2.6280891E+05  2.7128797E+05
  2.7968341E+05  2.8799581E+05  2.9622572E+05  3.0437381E+05
  3.1244056E+05  3.2042659E+05  3.2833250E+05  3.3615881E+05
  3.4390616E+05  3.5157503E+05  3.5916600E+05  3.6667962E+05
  3.7411647E+05  3.8147709E+05  3.8876200E+05  3.9597178E+05
  4.0310694E+05  4.1016800E+05  4.1715550E+05  4.2407000E+05
  4.3091200E+05  4.3768200E+05  4.4438056E+05  4.5100819E+05
  4.5756534E+05  4.6405259E+05  4.7047044E+05  4.7681931E+05
  4.8309981E+05  4.8931238E+05  4.9545750E+05  5.0153569E+05
  5.0754741E+05  5.1349316E+05  5.1937341E+05  5.2518862E+05
  5.3093931E+05  5.3662594E+05  5.4224894E+05  5.4780881E+05
  5.5330600E+05  5.5874100E+05  5.6411419E+05  5.6942612E+05
  5.7467712E+05  5.7986775E+05  5.8499844E+05  5.9006956E+05
  5.9508162E+05  6.0003506E+05  6.0493025E+05  6.0976762E+05
  6.1454769E+05  6.1927081E+05  6.2393744E+05  6.2854800E+05
  6.3310288E+05  6.3760244E+05  6.4204725E+05  6.4643756E+05
  6.5077388E+05  6.5505656E+05  6.5928600E+05  6.6346269E+05
  6.6758688E+05  6.7165912E+05  6.7567969E+05  6.7964900E+05
  6.8356744E+05  6.8743538E+05  6.9125325E+05  6.9502144E+05
  6.9874025E+05  7.0241012E+05  7.0603138E+05  7.0960438E+05
  7.1312956E+05  7.1660725E+05  7.2003781E+05  7.2342162E+05
  7.2675900E+05  7.3005031E+05  7.3329594E+05  7.3649619E+05
  7.3965144E+05  7.4276206E+05  7.4582838E+05  7.4885069E+05
  7.5182938E+05  7.5476475E+05  7.5765725E+05  7.6050706E+05
  7.6331456E+05  7.6608012E+05  7.6880406E+05  7.7148669E+05
  7.7412831E+05  7.7672931E+05  7.7928988E+05  7.8181050E+05
  7.8429131E+05  7.8673275E+05  7.8913512E+05  7.9149869E+05
  7.9382375E+05  7.9611069E+05  7.9835975E+05  8.0057119E+05
  8.0274538E+05  8.0488250E+05  8.0698306E+05  8.0904712E+05
  8.1107512E+05  8.1306738E+05  8.1502400E+05  8.1694544E+05
  8.1883188E+05  8.2068369E+05  8.2250106E+05  8.2428431E+05
  8.2603375E+05  8.2774956E+05  8.2943212E+05  8.3108162E+05
  8.3269838E+05  8.3428256E+05  8.3583462E+05  8.3735462E+05
  8.3884300E+05  8.4029988E+05  8.4172562E+05  8.4312038E+05
  8.4448450E+05  8.4581812E+05  8.4712162E+05  8.4839519E+05
  8.4963912E+05  8.5085356E+05  8.5203888E+05  8.5319519E+05
  8.5432281E+05  8.5542200E+05  8.5649300E+05  8.5753594E+05
  8.5855112E+05  8.5953888E+05  8.6049925E+05  8.6143262E+05
  8.6233912E+05  8.6321906E+05  8.6407262E+05  8.6490000E+05
  8.6570150E+05  8.6647725E+05  8.6722756E+05  8.6795256E+05
  8.6865250E+05  8.6932762E+05  8.6997812E+05  8.7060425E+05
  8.7120612E+05  8.7178400E+05  8.7233812E+05  8.7286869E+05
  8.7337588E+05  8.7385988E+05  8.7432088E+05  8.7475919E+05
  8.7517488E+05  8.7556825E+05  8.7593944E+05  8.7628869E+05
  8.7661612E+05  8.7692200E+05  8.7720644E+05  8.7746969E+05
  8.7771194E+05  8.7793338E+05  8.7813419E+05  8.7831450E+05
  8.7847456E+05  8.7861456E+05  8.7873462E+05  8.7883500E+05
  8.7891581E+05  8.7897725E+05  8.7901950E+05  8.7904275E+05
  8.7904712E+05  8.7903288E+05  8.7900012E+05  8.7894900E+05
  8.7887975E+05  8.7879250E+05  8.7868750E+05  8.7856475E+05
  8.7842456E+05  8.7826700E+05  8.7809238E+05  8.7790062E+05
  8.7769212E+05  8.7746688E+05  8.7722512E+05  8.7696700E+05
  8.7669269E+05  8.7640231E+05  8.7609600E+05  8.7577400E+05
  8.7543638E+05  8.7508325E+05  8.7471488E+05  8.7433138E+05
  8.7393281E+05  8.7351938E+05  8.7309125E+05  8.7264862E+05
  8.7219150E+05  8.7172006E+05  8.7123456E+05  8.7073500E+05
  8.7022162E+05  8.6969450E+05  8.6915375E+05  8.6859962E+05
  8.6803212E+05  8.6745144E+05  8.6685775E+05  8.6625112E+05
  8.6563169E+05  8.6499962E+05  8.6435506E+05  8.6369806E+05
  8.6302881E+05  8.6234744E+05  8.6165400E+05  8.6094875E+05
  8.6023169E+05  8.5950300E+05  8.5876275E+05  8.5801112E+05
  8.5724825E+05  8.5647419E+05  8.5568906E+05  8.5489306E+05
  8.5408625E+05  8.5326875E+05  8.5244062E+05  8.5160212E+05
  8.5075325E+05  8.4989412E+05  8.4902488E+05  8.4814562E+05
  8.4725650E+05  8.4635762E+05  8.4544900E+05  8.4453081E+05
  8.4360319E+05  8.4266619E+05  8.4172000E+05  8.4076462E+05
  8.3980019E+05  8.3882681E+05  8.3784462E+05  8.3685369E+05
  8.3585412E+05  8.3484606E+05  8.3382950E+05  8.3280469E+05
  8.3177162E+05  8.3073038E+05  8.2968112E+05  8.2862388E+05
  8.2755888E+05  8.2648606E+05  8.2540562E+05  8.2431756E+05
  8.2322206E+05  8.2211919E+05  8.2100900E+05  8.1989162E+05
  8.1876712E+05  8.1763562E+05  8.1649719E+05  8.1535188E+05
  8.1419988E+05  8.1304112E+05  8.1187581E+05  8.1070400E+05
  8.0952581E+05  8.0834125E+05  8.0715050E+05  8.0595350E+05
  8.0475044E+05  8.0354138E+05  8.0232644E+05  8.0110562E+05
  7.9987906E+05  7.9864675E+05  7.9740894E+05  7.9616550E+05
  7.9491669E+05  7.9366250E+05  7.9240300E+05  7.9113825E+05
  7.8986838E+05  7.8859338E+05  7.8731344E+05  7.8602856E+05
  7.8473881E+05  7.8344431E+05  7.8214506E+05  7.8084119E+05
  7.7953275E+05  7.7821981E+05  7.7690250E+05  7.7558075E+05
  7.7425469E+05  7.7292444E+05  7.7159006E+05  7.7025156E+05
  7.6890900E+05  7.6756250E+05  7.6621212E+05  7.6485788E+05
  7.6349988E+05  7.6213819E+05  7.6077288E+05  7.5940394E+05
  7.5803150E+05  7.5665562E+05  7.5527631E+05  7.5389369E+05
  7.5250781E+05  7.5111869E+05  7.4972638E+05  7.4833100E+05
  7.4693262E+05  7.4553125E+05  7.4412688E+05  7.4271969E+05
  7.4130969E+05  7.3989694E+05  7.3848150E+05  7.3706338E+05
  7.3564269E+05  7.3421944E+05  7.3279369E+05  7.3136556E+05
  7.2993500E+05  7.2850212E+05  7.2706700E+05  7.2562962E+05
  7.2419012E+05  7.2274844E+05  7.2130469E+05  7.1985894E+05
  7.1841119E+05  7.1696150E+05  7.1551000E+05  7.1405662E+05
  7.1260150E+05  7.1114462E+05  7.0968600E+05  7.0822581E+05
  7.0676400E+05  7.0530069E+05  7.0383581E+05  7.0236950E+05
  7.0090175E+05  6.9943262E+05  6.9796225E+05  6.9649050E+05
  6.9501756E+05  6.9354338E+05  6.9206812E+05  6.9059169E+05
  6.8911419E+05  6.8763562E+05  6.8615612E+05  6.8467569E+05
  6.8319431E+05  6.8171206E+05  6.8022900E+05  6.7874512E+05
  6.7726050E+05  6.7577512E+05  6.7428912E+05  6.7280250E+05
  6.7131525E+05  6.6982738E+05  6.6833906E+05  6.6685025E+05
  6.6536094E+05  6.6387125E+05  6.6238112E+05  6.6089069E+05
  6.5939994E+05  6.5790888E+05  6.5641762E+05  6.5492612E+05
  6.5343444E+05  6.5194262E+05  6.5045069E+05  6.4895869E+05
  6.4746662E+05  6.4597456E+05  6.4448250E+05  6.4299050E+05
  6.4149856E+05  6.4000675E+05  6.3851506E+05  6.3702356E+05
  6.3553225E+05  6.3404119E+05  6.3255038E+05  6.3105988E+05
  6.2956962E+05  6.2807975E+05  6.2659031E+05  6.2510125E+05
  6.2361256E+05  6.2212438E+05  6.2063669E+05  6.1914950E+05
  6.1766288E+05  6.1617675E+05  6.1469131E+05  6.1320644E+05
  6.1172219E+05  6.1023862E+05  6.0875581E+05  6.0727369E+05
  6.0579225E+05  6.0431162E+05  6.0283181E+05  6.0135281E+05
  5.9987469E+05  5.9839738E+05  5.9692094E+05  5.9544550E+05
  5.9397088E+05  5.9249731E+05  5.9102469E+05  5.8955306E+05
  5.8808244E+05  5.8661294E+05  5.8514444E+05  5.8367706E+05
  5.8221075E+05  5.8074562E+05  5.7928162E+05  5.7781875E+05
  5.7635712E+05  5.7489675E+05  5.7343756E+05  5.7197962E+05
  5.7052294E+05  5.6906756E+05  5.6761350E+05  5.6616075E+05
  5.6470938E+05  5.6325931E+05  5.6181069E+05  5.6036344E+05
  5.5891762E+05  5.5747325E+05  5.5603031E+05  5.5458888E+05
  5.5314888E+05  5.5171044E+05  5.5027350E+05  5.4883806E+05
  5.4740419E+05  5.4597194E+05  5.4454125E+05  5.4311212E+05
  5.4168469E+05  5.4025881E+05  5.3883462E+05  5.3741212E+05
  5.3599125E+05  5.3457212E+05  5.3315462E+05  5.3173894E+05
  5.3032494E+05  5.2891269E+05  5.2750225E+05  5.2609350E+05
  5.2468662E+05  5.2328153E+05  5.2187825E+05  5.2047678E+05
  5.1907719E+05  5.1767944E+05  5.1628356E+05  5.1488956E+05
  5.1349744E+05  5.1210722E+05  5.1071894E+05  5.0933256E+05
  5.0794819E+05  5.0656569E+05  5.0518522E+05  5.0380669E+05
  5.0243016E+05  5.0105562E+05  4.9968309E+05  4.9831256E+05
  4.9694409E+05  4.9557766E+05  4.9421328E+05  4.9285094E+05
  4.9149069E+05  4.9013247E+05  4.8877641E+05  4.8742241E+05
  4.8607050E+05  4.8472075E+05  4.8337309E+05  4.8202759E+05
  4.8068422E+05  4.7934303E+05  4.7800397E+05  4.7666709E+05
  4.7533241E+05  4.7399991E+05  4.7266956E+05  4.7134147E+05
  4.7001556E+05  4.6869191E+05  4.6737044E+05  4.6605122E+05
  4.6473425E+05  4.6341953E+05  4.6210706E+05  4.6079681E+05
  4.5948891E+05  4.5818322E+05  4.5687984E+05  4.5557878E+05
  4.5427997E+05  4.5298350E+05  4.5168931E+05  4.5039744E+05
  4.4910794E+05  4.4782069E+05  4.4653581E+05  4.4525331E+05
  4.4397309E+05  4.4269528E+05  4.4141981E+05  4.4014669E+05
  4.3887594E+05  4.3760753E+05  4.3634153E+05  4.3507791E+05
  4.3381669E+05  4.3255781E+05  4.3130141E+05  4.3004734E+05
  4.2879569E+05  4.2754647E+05  4.2629969E+05  4.2505528E+05
  4.2381331E+05  4.2257378E+05  4.2133666E+05  4.2010197E+05
  4.1886975E+05  4.1763994E+05  4.1641259E+05  4.1518769E+05
  4.1396525E+05  4.1274525E+05  4.1152772E+05  4.1031269E+05
  4.0910006E+05  4.0788994E+05  4.0668228E+05  4.0547709E+05
  4.0427441E+05  4.0307419E+05  4.0187644E+05  4.0068119E+05
  3.9948841E+05  3.9829812E+05  3.9711031E+05  3.9592506E+05
  3.9474225E+05  3.9356197E+05  3.9238419E+05  3.9120891E+05
  3.9003609E+05  3.8886581E+05  3.8769806E+05  3.8653281E+05
  3.8537006E+05  3.8420984E+05  3.8305216E+05  3.8189694E+05
  3.8074428E+05  3.7959412E+05  3.7844647E+05  3.7730138E+05
  3.7615878E+05  3.7501872E+05  3.7388119E+05  3.7274619E+05
  3.7161369E+05  3.7048372E+05  3.6935628E+05  3.6823138E+05
  3.6710903E+05  3.6598919E+05  3.6487184E+05  3.6375706E+05
  3.6264481E+05  3.6153512E+05  3.6042794E+05  3.5932328E+05
  3.5822116E+05  3.5712156E+05  3.5602453E+05  3.5493000E+05
  3.5383800E+05  3.5274856E+05  3.5166162E+05  3.5057722E+05
  3.4949538E+05  3.4841606E+05  3.4733925E+05  3.4626497E+05
  3.4519322E+05  3.4412403E+05  3.4305734E+05  3.4199319E+05
  3.4093156E+05  3.3987247E+05  3.3881591E+05  3.3776188E+05
  3.3671034E+05  3.3566134E+05  3.3461488E+05  3.3357094E+05
  3.3252950E+05  3.3149056E+05  3.3045419E+05  3.2942031E+05
  3.2838894E+05  3.2736009E+05  3.2633378E+05  3.2530994E+05
  3.2428862E+05  3.2326981E+05  3.2225356E+05  3.2123975E+05
  3.2022847E+05  3.1921969E+05  3.1821344E+05  3.1720966E+05
  3.1620838E+05  3.1520959E+05  3.1421331E+05  3.1321950E+05
  3.1222819E+05  3.1123941E+05  3.1025306E+05  3.0926922E+05
  3.0828788E+05  3.0730900E+05  3.0633259E+05  3.0535869E+05
  3.0438722E+05  3.0341828E+05  3.0245178E+05  3.0148772E+05
  3.0052619E+05  2.9956706E+05  2.9861044E+05  2.9765625E+05
  2.9670453E+05  2.9575525E+05  2.9480844E+05  2.9386406E+05
  2.9292216E+05  2.9198269E+05  2.9104566E+05  2.9011106E+05
  2.8917891E+05  2.8824919E+05  2.8732191E+05  2.8639706E+05
  2.8547459E+05  2.8455459E+05  2.8363700E+05  2.8272184E+05
  2.8180906E+05  2.8089875E+05  2.7999081E+05  2.7908528E+05
  2.7818216E+05  2.7728144E+05  2.7638309E+05  2.7548719E+05
  2.7459366E+05  2.7370250E+05  2.7281372E+05  2.7192734E+05
  2.7104334E+05  2.7016172E+05  2.6928247E+05  2.6840559E+05
  2.6753106E+05  2.6665894E+05  2.6578912E+05  2.6492169E+05
  2.6405662E+05  2.6319391E+05  2.6233350E+05  2.6147547E+05
  2.6061978E+05  2.5976642E+05  2.5891538E+05  2.5806670E+05
  2.5722033E+05  2.5637628E+05  2.5553455E+05  2.5469516E+05
  2.5385805E+05  2.5302328E+05  2.5219080E+05  2.5136062E+05
  2.5053272E+05  2.4970716E+05  2.4888386E+05  2.4806286E+05
  2.4724414E+05  2.4642772E+05  2.4561355E+05  2.4480167E+05
  2.4399206E+05  2.4318470E+05  2.4237962E+05  2.4157680E+05
  2.4077622E+05  2.3997791E+05  2.3918183E+05  2.3838800E+05
  2.3759642E+05  2.3680706E+05  2.3601994E+05  2.3523505E+05
  2.3445239E+05  2.3367194E+05  2.3289372E+05  2.3211770E+05
  2.3134389E+05  2.3057230E+05  2.2980289E+05  2.2903569E+05
  2.2827069E+05  2.2750788E+05  2.2674723E+05  2.2598880E+05
  2.2523252E+05  2.2447842E+05  2.2372650E+05  2.2297673E+05
  2.2222912E+05  2.2148369E+05  2.2074041E+05  2.1999927E+05
  2.1926027E+05  2.1852342E+05  2.1778870E+05  2.1705612E+05
  2.1632567E+05  2.1559734E+05  2.1487114E+05  2.1414706E+05
  2.1342509E+05  2.1270522E+05  2.1198747E+05  2.1127181E+05
  2.1055825E+05  2.0984678E+05  2.0913739E+05  2.0843009E+05
  2.0772488E+05  2.0702175E+05  2.0632067E+05  2.0562167E+05
  2.0492473E+05  2.0422986E+05  2.0353703E+05  2.0284627E+05
  2.0215753E+05  2.0147086E+05  2.0078620E+05  2.0010359E+05
  1.9942302E+05  1.9874445E+05  1.9806792E+05  1.9739341E+05
  1.9672091E+05  1.9605041E+05  1.9538192E+05  1.9471542E+05
  1.9405094E+05  1.9338842E+05  1.9272791E+05  1.9206938E+05
  1.9141283E+05  1.9075825E+05  1.9010562E+05  1.8945498E+05
  1.8880631E+05  1.8815958E+05  1.8751481E+05  1.8687198E+05
  1.8623111E+05  1.8559217E+05  1.8495517E+05  1.8432011E+05
  1.8368697E+05  1.8305575E+05  1.8242645E+05  1.8179906E+05
  1.8117359E+05  1.8055002E+05  1.7992836E+05  1.7930859E+05
  1.7869072E+05  1.7807473E+05  1.7746062E+05  1.7684841E+05
  1.7623806E+05  1.7562958E+05  1.7502298E+05  1.7441823E+05
  1.7381534E+05  1.7321431E+05  1.7261514E+05  1.7201781E+05
  1.7142231E+05  1.7082866E+05  1.7023684E+05  1.6964684E+05
  1.6905867E+05  1.6847233E+05  1.6788780E+05  1.6730508E+05
  1.6672416E+05  1.6614505E+05  1.6556773E+05  1.6499222E+05
  1.6441850E+05  1.6384655E+05  1.6327639E+05  1.6270800E+05
  1.6214139E+05  1.6157656E+05  1.6101348E+05  1.6045216E+05
  1.5989261E+05  1.5933480E+05  1.5877873E+05  1.5822441E+05
  1.5767183E+05  1.5712098E+05  1.5657188E+05  1.5602448E+05
  1.5547881E+05  1.5493486E+05  1.5439262E+05  1.5385211E+05
  1.5331328E+05  1.5277616E+05  1.5224073E+05  1.5170700E+05
  1.5117495E+05  1.5064459E+05  1.5011591E+05  1.4958889E+05
  1.4906356E+05  1.4853989E+05  1.4801788E+05  1.4749753E+05
  1.4697884E+05  1.4646180E+05  1.4594639E+05  1.4543264E+05
  1.4492052E+05  1.4441003E+05  1.4390117E+05  1.4339394E+05
  1.4288831E+05  1.4238433E+05  1.4188194E+05  1.4138116E+05
  1.4088198E+05  1.4038442E+05  1.3988844E+05  1.3939405E+05
  1.3890125E+05  1.3841003E+05  1.3792041E+05  1.3743234E+05
  1.3694584E+05  1.3646092E+05  1.3597756E+05  1.3549575E+05
  1.3501552E+05  1.3453681E+05  1.3405966E+05  1.3358405E+05
  1.3310997E+05  1.3263744E+05  1.3216642E+05  1.3169694E+05
  1.3122898E+05  1.3076254E+05  1.3029761E+05  1.2983419E+05
  1.2937227E+05  1.2891186E+05  1.2845295E+05  1.2799552E+05
  1.2753959E+05  1.2708514E+05  1.2663217E+05  1.2618069E+05
  1.2573066E+05  1.2528212E+05  1.2483504E+05  1.2438942E+05
  1.2394526E+05  1.2350255E+05  1.2306129E+05  1.2262147E+05
  1.2218309E+05  1.2174616E+05  1.2131066E+05  1.2087659E+05
  1.2044394E+05  1.2001272E+05  1.1958291E+05  1.1915452E+05
  1.1872753E+05  1.1830195E+05  1.1787778E+05  1.1745501E+05
  1.1703362E+05  1.1661363E+05  1.1619502E+05  1.1577780E+05
  1.1536196E+05  1.1494749E+05  1.1450993E+05  1.1409901E+05
  1.1368995E+05  1.1328277E+05  1.1287745E+05  1.1247400E+05
  1.1207239E+05  1.1167263E+05  1.1127472E+05  1.1087863E+05
  1.1048438E+05  1.1009196E+05  1.0970134E+05  1.0931255E+05
  1.0892555E+05  1.0854037E+05  1.0815697E+05  1.0777536E+05
  1.0739553E+05  1.0701748E+05  1.0664120E+05  1.0626669E+05
  1.0589393E+05  1.0552292E+05  1.0515366E+05  1.0478615E+05
  1.0442036E+05  1.0405630E+05  1.0369396E+05  1.0333334E+05
  1.0297442E+05  1.0261721E+05  1.0226170E+05  1.0190787E+05
  1.0155573E+05  1.0120526E+05  1.0085647E+05  1.0050934E+05
  1.0016387E+05  9.9820047E+04  9.9477875E+04  9.9137344E+04
  9.8798438E+04  9.8461164E+04  9.8125508E+04  9.7791469E+04
  9.7459031E+04  9.7128195E+04  9.6798961E+04  9.6471305E+04
  9.6145234E+04  9.5820734E+04  9.5497805E+04  9.5176438E+04
  9.4856625E+04  9.4538359E+04  9.4221633E+04  9.3906445E+04
  9.3592781E+04  9.3280648E+04  9.2970023E+04  9.2660906E+04
  9.2353289E+04  9.2047172E+04  9.1742539E+04  9.1439398E+04
  9.1137719E+04  9.0837516E+04  9.0538773E+04  9.0241477E+04
  8.9945641E+04  8.9651234E+04  8.9358273E+04  8.9066734E+04
  8.8776617E+04  8.8487906E+04  8.8200617E+04  8.7914719E+04
  8.7630219E+04  8.7347102E+04  8.7065359E+04  8.6785000E+04
  8.6506000E+04  8.6228367E+04  8.5952078E+04  8.5677141E+04
  8.5403539E+04  8.5131273E+04  8.4860328E+04  8.4590703E+04
  8.4322391E+04  8.4055375E+04  8.3789664E+04  8.3525242E+04
  8.3262102E+04  8.3000242E+04  8.2739648E+04  8.2480320E+04
  8.2222242E+04  8.1965414E+04  8.1709836E+04  8.1455484E+04
  8.1202359E+04  8.0950461E+04  8.0699773E+04  8.0450289E+04
  8.0202016E+04  7.9954930E+04  7.9709031E+04  7.9464305E+04
  7.9220758E+04  7.8978367E+04  7.8737148E+04  7.8497070E+04
  7.8258141E+04  7.8020344E+04  7.7783680E+04  7.7548141E+04
  7.7313719E+04  7.7080398E+04  7.6848188E+04  7.6617070E+04
  7.6387039E+04  7.6158094E+04  7.5930219E+04  7.5703406E+04
  7.5477664E+04  7.5252969E+04  7.5029320E+04  7.4806711E+04
  7.4585133E+04  7.4364586E+04  7.4145055E+04  7.3926531E+04
  7.3709016E+04  7.3492492E+04  7.3276969E+04  7.3062414E+04
  7.2848852E+04  7.2636250E+04  7.2424609E+04  7.2213930E+04
  7.2004195E+04  7.1795406E+04  7.1587547E+04  7.1380617E+04
  7.1174609E+04  7.0969516E+04  7.0765328E+04  7.0562039E+04
  7.0359648E+04  7.0158141E+04  6.9957508E+04  6.9757750E+04
  6.9558859E+04  6.9360828E+04  6.9163648E+04  6.8967312E+04
  6.8771820E+04  6.8577148E+04  6.8383312E+04  6.8190281E+04
  6.7998070E+04  6.7806656E+04  6.7616047E+04  6.7426227E+04
  6.7237188E+04  6.7048922E+04  6.6861430E+04  6.6674703E+04
  6.6488727E+04  6.6303500E+04  6.6119023E+04  6.5935281E+04
  6.5752258E+04  6.5569969E+04  6.5388391E+04  6.5207523E+04
  6.5027359E+04  6.4847887E+04  6.4669105E+04  6.4491008E+04
  6.4313586E+04  6.4136828E+04  6.3960738E+04  6.3785305E+04
  6.3610520E+04  6.3436379E+04  6.3262871E+04  6.3089996E+04
  6.2917742E+04  6.2746105E+04  6.2575078E+04  6.2404656E+04
  6.2234828E+04  6.2065594E+04  6.1896941E+04  6.1728867E+04
  6.1561363E+04  6.1394426E+04  6.1228047E+04  6.1062219E+04
  6.0896941E+04  6.0732199E+04  6.0567988E+04  6.0404305E+04
  6.0241141E+04  6.0078492E+04  5.9916352E+04  5.9754711E+04
  5.9593570E+04  5.9432914E+04  5.9272742E+04  5.9113047E+04
  5.8953820E+04  5.8795059E+04  5.8636758E+04  5.8478906E+04
  5.8321500E+04  5.8164535E+04  5.8008004E+04  5.7851898E+04
  5.7696215E+04  5.7540949E+04  5.7386090E+04  5.7231637E+04
[truncated: 667,824 more chars]
