# Supplementary material for: 2D or not 2D: Structural and charge ordering at the solid-liquid interface of the 1-(2-hydroxyethyl)-3-methylimidazolium tetrafluoroborate ionic liquid
Source: Royal Society of Chemistry journal article supplement (doi:10.1039/c1fd00043h), 2011-07-15
Supplement: c1fd00043h.bk7 [file c1fd00043h.bk7]

BK7 Potentials (Vessal) in internal units. The numbers below correspond to: i) step; ii) rvdw cuttoff and iii) total number of step.
  1.5212170E-03  7.6000000E+00      5000
Si4+    O_2-     
  9.5140002E+06  9.4702042E+06  9.4266099E+06  9.3832162E+06
  9.3400223E+06  9.2970273E+06  9.2542301E+06  9.2116300E+06
  9.1692260E+06  9.1270171E+06  9.0850026E+06  9.0431815E+06
  9.0015529E+06  8.9601159E+06  8.9188696E+06  8.8778133E+06
  8.8369459E+06  8.7962667E+06  8.7557747E+06  8.7154691E+06
  8.6753490E+06  8.6354137E+06  8.5956621E+06  8.5560936E+06
  8.5167072E+06  8.4775021E+06  8.4384775E+06  8.3996325E+06
  8.3609664E+06  8.3224782E+06  8.2841672E+06  8.2460326E+06
  8.2080735E+06  8.1702892E+06  8.1326787E+06  8.0952415E+06
  8.0579765E+06  8.0208831E+06  7.9839605E+06  7.9472078E+06
  7.9106243E+06  7.8742092E+06  7.8379617E+06  7.8018811E+06
  7.7659666E+06  7.7302174E+06  7.6946328E+06  7.6592120E+06
  7.6239542E+06  7.5888587E+06  7.5539248E+06  7.5191517E+06
  7.4845387E+06  7.4500850E+06  7.4157899E+06  7.3816527E+06
  7.3476726E+06  7.3138490E+06  7.2801810E+06  7.2466681E+06
  7.2133094E+06  7.1801042E+06  7.1470520E+06  7.1141518E+06
  7.0814031E+06  7.0488052E+06  7.0163573E+06  6.9840588E+06
  6.9519090E+06  6.9199072E+06  6.8880527E+06  6.8563448E+06
  6.8247829E+06  6.7933663E+06  6.7620942E+06  6.7309662E+06
  6.6999814E+06  6.6691393E+06  6.6384392E+06  6.6078803E+06
  6.5774622E+06  6.5471841E+06  6.5170453E+06  6.4870453E+06
  6.4571834E+06  6.4274589E+06  6.3978713E+06  6.3684199E+06
  6.3391041E+06  6.3099232E+06  6.2808766E+06  6.2519637E+06
  6.2231840E+06  6.1945367E+06  6.1660213E+06  6.1376372E+06
  6.1093837E+06  6.0812603E+06  6.0532663E+06  6.0254012E+06
  5.9976644E+06  5.9700553E+06  5.9425732E+06  5.9152177E+06
  5.8879881E+06  5.8608838E+06  5.8339043E+06  5.8070490E+06
  5.7803173E+06  5.7537087E+06  5.7272226E+06  5.7008584E+06
  5.6746155E+06  5.6484935E+06  5.6224917E+06  5.5966096E+06
  5.5708466E+06  5.5452023E+06  5.5196760E+06  5.4942671E+06
  5.4689753E+06  5.4437999E+06  5.4187404E+06  5.3937962E+06
  5.3689669E+06  5.3442518E+06  5.3196505E+06  5.2951625E+06
  5.2707872E+06  5.2465241E+06  5.2223727E+06  5.1983325E+06
  5.1744029E+06  5.1505835E+06  5.1268738E+06  5.1032731E+06
  5.0797812E+06  5.0563973E+06  5.0331211E+06  5.0099521E+06
  4.9868897E+06  4.9639335E+06  4.9410829E+06  4.9183376E+06
  4.8956969E+06  4.8731605E+06  4.8507278E+06  4.8283984E+06
  4.8061717E+06  4.7840474E+06  4.7620249E+06  4.7401038E+06
  4.7182836E+06  4.6965639E+06  4.6749441E+06  4.6534239E+06
  4.6320027E+06  4.6106801E+06  4.5894557E+06  4.5683290E+06
  4.5472996E+06  4.5263669E+06  4.5055306E+06  4.4847902E+06
  4.4641453E+06  4.4435955E+06  4.4231402E+06  4.4027791E+06
  4.3825117E+06  4.3623376E+06  4.3422564E+06  4.3222676E+06
  4.3023709E+06  4.2825657E+06  4.2628517E+06  4.2432285E+06
  4.2236955E+06  4.2042525E+06  4.1848990E+06  4.1656346E+06
  4.1464589E+06  4.1273715E+06  4.1083719E+06  4.0894597E+06
  4.0706347E+06  4.0518962E+06  4.0332441E+06  4.0146778E+06
  3.9961970E+06  3.9778012E+06  3.9594901E+06  3.9412634E+06
  3.9231205E+06  3.9050611E+06  3.8870849E+06  3.8691914E+06
  3.8513803E+06  3.8336512E+06  3.8160037E+06  3.7984374E+06
  3.7809520E+06  3.7635471E+06  3.7462223E+06  3.7289773E+06
  3.7118116E+06  3.6947250E+06  3.6777170E+06  3.6607873E+06
  3.6439356E+06  3.6271614E+06  3.6104644E+06  3.5938443E+06
  3.5773007E+06  3.5608333E+06  3.5444416E+06  3.5281254E+06
  3.5118844E+06  3.4957181E+06  3.4796262E+06  3.4636084E+06
  3.4476643E+06  3.4317936E+06  3.4159960E+06  3.4002711E+06
  3.3846185E+06  3.3690381E+06  3.3535293E+06  3.3380920E+06
  3.3227257E+06  3.3074301E+06  3.2922050E+06  3.2770499E+06
  3.2619646E+06  3.2469488E+06  3.2320021E+06  3.2171241E+06
  3.2023147E+06  3.1875734E+06  3.1729000E+06  3.1582942E+06
  3.1437556E+06  3.1292839E+06  3.1148788E+06  3.1005400E+06
  3.0862672E+06  3.0720602E+06  3.0579185E+06  3.0438420E+06
  3.0298302E+06  3.0158829E+06  3.0019999E+06  2.9881807E+06
  2.9744252E+06  2.9607330E+06  2.9471038E+06  2.9335373E+06
  2.9200333E+06  2.9065915E+06  2.8932116E+06  2.8798932E+06
  2.8666361E+06  2.8534401E+06  2.8403048E+06  2.8272300E+06
  2.8142154E+06  2.8012607E+06  2.7883656E+06  2.7755298E+06
  2.7627532E+06  2.7500354E+06  2.7373761E+06  2.7247751E+06
  2.7122321E+06  2.6997468E+06  2.6873191E+06  2.6749485E+06
  2.6626348E+06  2.6503779E+06  2.6381774E+06  2.6260330E+06
  2.6139446E+06  2.6019117E+06  2.5899343E+06  2.5780120E+06
  2.5661446E+06  2.5543319E+06  2.5425735E+06  2.5308692E+06
  2.5192188E+06  2.5076221E+06  2.4960787E+06  2.4845885E+06
  2.4731511E+06  2.4617664E+06  2.4504341E+06  2.4391540E+06
  2.4279258E+06  2.4167493E+06  2.4056242E+06  2.3945504E+06
  2.3835275E+06  2.3725554E+06  2.3616338E+06  2.3507624E+06
  2.3399411E+06  2.3291697E+06  2.3184478E+06  2.3077752E+06
  2.2971518E+06  2.2865773E+06  2.2760514E+06  2.2655741E+06
  2.2551449E+06  2.2447638E+06  2.2344304E+06  2.2241446E+06
  2.2139062E+06  2.2037149E+06  2.1935705E+06  2.1834728E+06
  2.1734216E+06  2.1634166E+06  2.1534577E+06  2.1435447E+06
  2.1336773E+06  2.1238553E+06  2.1140785E+06  2.1043468E+06
  2.0946598E+06  2.0850174E+06  2.0754194E+06  2.0658656E+06
  2.0563558E+06  2.0468897E+06  2.0374672E+06  2.0280881E+06
  2.0187522E+06  2.0094593E+06  2.0002091E+06  1.9910015E+06
  1.9818363E+06  1.9727133E+06  1.9636322E+06  1.9545930E+06
  1.9455954E+06  1.9366392E+06  1.9277243E+06  1.9188504E+06
  1.9100173E+06  1.9012249E+06  1.8924729E+06  1.8837613E+06
  1.8750897E+06  1.8664581E+06  1.8578662E+06  1.8493139E+06
  1.8408009E+06  1.8323271E+06  1.8238923E+06  1.8154964E+06
  1.8071391E+06  1.7988202E+06  1.7905397E+06  1.7822973E+06
  1.7740928E+06  1.7659261E+06  1.7577970E+06  1.7497053E+06
  1.7416509E+06  1.7336335E+06  1.7256530E+06  1.7177093E+06
  1.7098021E+06  1.7019314E+06  1.6940969E+06  1.6862984E+06
  1.6785358E+06  1.6708090E+06  1.6631177E+06  1.6554619E+06
  1.6478413E+06  1.6402557E+06  1.6327051E+06  1.6251893E+06
  1.6177080E+06  1.6102612E+06  1.6028487E+06  1.5954702E+06
  1.5881258E+06  1.5808151E+06  1.5735382E+06  1.5662947E+06
  1.5590845E+06  1.5519076E+06  1.5447636E+06  1.5376526E+06
  1.5305743E+06  1.5235286E+06  1.5165153E+06  1.5095343E+06
  1.5025854E+06  1.4956686E+06  1.4887835E+06  1.4819302E+06
  1.4751084E+06  1.4683180E+06  1.4615589E+06  1.4548309E+06
  1.4481338E+06  1.4414676E+06  1.4348321E+06  1.4282271E+06
  1.4216525E+06  1.4151082E+06  1.4085940E+06  1.4021098E+06
  1.3956555E+06  1.3892308E+06  1.3828358E+06  1.3764701E+06
  1.3701338E+06  1.3638266E+06  1.3575485E+06  1.3512993E+06
  1.3450788E+06  1.3388870E+06  1.3327237E+06  1.3265888E+06
  1.3204820E+06  1.3144035E+06  1.3083528E+06  1.3023301E+06
  1.2963350E+06  1.2903676E+06  1.2844276E+06  1.2785150E+06
  1.2726296E+06  1.2667713E+06  1.2609399E+06  1.2551354E+06
  1.2493577E+06  1.2436065E+06  1.2378818E+06  1.2321834E+06
  1.2265113E+06  1.2208652E+06  1.2152452E+06  1.2096511E+06
  1.2040827E+06  1.1985399E+06  1.1930226E+06  1.1875308E+06
  1.1820642E+06  1.1766228E+06  1.1712064E+06  1.1658150E+06
  1.1604484E+06  1.1551065E+06  1.1497891E+06  1.1444963E+06
  1.1392278E+06  1.1339836E+06  1.1287635E+06  1.1235675E+06
  1.1183953E+06  1.1132470E+06  1.1081224E+06  1.1030213E+06
  1.0979438E+06  1.0928896E+06  1.0878587E+06  1.0828509E+06
  1.0778662E+06  1.0729045E+06  1.0679655E+06  1.0630494E+06
  1.0581558E+06  1.0532848E+06  1.0484362E+06  1.0436099E+06
  1.0388058E+06  1.0340239E+06  1.0292640E+06  1.0245259E+06
  1.0198097E+06  1.0151152E+06  1.0104423E+06  1.0057909E+06
  1.0011610E+06  9.9655230E+05  9.9196485E+05  9.8739853E+05
  9.8285322E+05  9.7832884E+05  9.7382528E+05  9.6934246E+05
  9.6488027E+05  9.6043862E+05  9.5601742E+05  9.5161657E+05
  9.4723598E+05  9.4287555E+05  9.3853520E+05  9.3421483E+05
  9.2991434E+05  9.2563365E+05  9.2137267E+05  9.1713130E+05
  9.1290946E+05  9.0870705E+05  9.0452398E+05  9.0036017E+05
  8.9621553E+05  8.9208997E+05  8.8798340E+05  8.8389573E+05
  8.7982688E+05  8.7577676E+05  8.7174528E+05  8.6773236E+05
  8.6373792E+05  8.5976186E+05  8.5580411E+05  8.5186457E+05
  8.4794317E+05  8.4403982E+05  8.4015444E+05  8.3628694E+05
  8.3243725E+05  8.2860528E+05  8.2479095E+05  8.2099418E+05
  8.1721488E+05  8.1345298E+05  8.0970840E+05  8.0598106E+05
  8.0227088E+05  7.9857777E+05  7.9490167E+05  7.9124248E+05
  7.8760014E+05  7.8397457E+05  7.8036569E+05  7.7677342E+05
  7.7319769E+05  7.6963842E+05  7.6609553E+05  7.6256895E+05
  7.5905860E+05  7.5556442E+05  7.5208632E+05  7.4862423E+05
  7.4517807E+05  7.4174778E+05  7.3833329E+05  7.3493451E+05
  7.3155137E+05  7.2818381E+05  7.2483175E+05  7.2149512E+05
  7.1817385E+05  7.1486787E+05  7.1157711E+05  7.0830150E+05
  7.0504096E+05  7.0179543E+05  6.9856485E+05  6.9534914E+05
  6.9214822E+05  6.8896205E+05  6.8579054E+05  6.8263363E+05
  6.7949125E+05  6.7636334E+05  6.7324983E+05  6.7015064E+05
  6.6706573E+05  6.6399502E+05  6.6093844E+05  6.5789593E+05
  6.5486743E+05  6.5185287E+05  6.4885218E+05  6.4586531E+05
  6.4289219E+05  6.3993275E+05  6.3698694E+05  6.3405469E+05
  6.3113594E+05  6.2823062E+05  6.2533868E+05  6.2246005E+05
  6.1959467E+05  6.1674248E+05  6.1390342E+05  6.1107743E+05
  6.0826444E+05  6.0546441E+05  6.0267727E+05  5.9990295E+05
  5.9714141E+05  5.9439258E+05  5.9165641E+05  5.8893283E+05
  5.8622178E+05  5.8352322E+05  5.8083708E+05  5.7816330E+05
  5.7550183E+05  5.7285262E+05  5.7021560E+05  5.6759071E+05
  5.6497792E+05  5.6237714E+05  5.5978834E+05  5.5721146E+05
  5.5464644E+05  5.5209323E+05  5.4955177E+05  5.4702201E+05
  5.4450390E+05  5.4199737E+05  5.3950239E+05  5.3701889E+05
  5.3454682E+05  5.3208614E+05  5.2963677E+05  5.2719869E+05
  5.2477183E+05  5.2235614E+05  5.1995157E+05  5.1755807E+05
  5.1517558E+05  5.1280407E+05  5.1044347E+05  5.0809374E+05
  5.0575482E+05  5.0342667E+05  5.0110924E+05  4.9880248E+05
  4.9650633E+05  4.9422076E+05  4.9194571E+05  4.8968112E+05
  4.8742697E+05  4.8518319E+05  4.8294974E+05  4.8072657E+05
  4.7851363E+05  4.7631088E+05  4.7411827E+05  4.7193576E+05
  4.6976329E+05  4.6760082E+05  4.6544831E+05  4.6330570E+05
  4.6117296E+05  4.5905003E+05  4.5693688E+05  4.5483346E+05
  4.5273972E+05  4.5065561E+05  4.4858110E+05  4.4651614E+05
  4.4446069E+05  4.4241470E+05  4.4037812E+05  4.3835092E+05
  4.3633306E+05  4.3432448E+05  4.3232514E+05  4.3033502E+05
  4.2835405E+05  4.2638220E+05  4.2441943E+05  4.2246569E+05
  4.2052095E+05  4.1858516E+05  4.1665828E+05  4.1474027E+05
  4.1283109E+05  4.1093070E+05  4.0903905E+05  4.0715612E+05
  4.0528185E+05  4.0341621E+05  4.0155916E+05  3.9971066E+05
  3.9787066E+05  3.9603914E+05  3.9421604E+05  3.9240134E+05
  3.9059500E+05  3.8879697E+05  3.8700721E+05  3.8522569E+05
  3.8345238E+05  3.8168723E+05  3.7993020E+05  3.7818126E+05
  3.7644037E+05  3.7470750E+05  3.7298260E+05  3.7126565E+05
  3.6955660E+05  3.6785541E+05  3.6616206E+05  3.6447650E+05
  3.6279870E+05  3.6112862E+05  3.5946623E+05  3.5781149E+05
  3.5616438E+05  3.5452484E+05  3.5289285E+05  3.5126837E+05
  3.4965137E+05  3.4804182E+05  3.4643967E+05  3.4484490E+05
  3.4325747E+05  3.4167735E+05  3.4010450E+05  3.3853889E+05
  3.3698049E+05  3.3542926E+05  3.3388518E+05  3.3234820E+05
  3.3081829E+05  3.2929543E+05  3.2777958E+05  3.2627071E+05
  3.2476878E+05  3.2327377E+05  3.2178564E+05  3.2030436E+05
  3.1882990E+05  3.1736222E+05  3.1590130E+05  3.1444711E+05
  3.1299961E+05  3.1155878E+05  3.1012457E+05  3.0869697E+05
  3.0727594E+05  3.0586145E+05  3.0445348E+05  3.0305198E+05
  3.0165694E+05  3.0026832E+05  2.9888609E+05  2.9751022E+05
  2.9614069E+05  2.9477746E+05  2.9342050E+05  2.9206980E+05
  2.9072531E+05  2.8938701E+05  2.8805487E+05  2.8672886E+05
  2.8540896E+05  2.8409513E+05  2.8278735E+05  2.8148559E+05
  2.8018983E+05  2.7890002E+05  2.7761616E+05  2.7633820E+05
  2.7506613E+05  2.7379992E+05  2.7253953E+05  2.7128494E+05
  2.7003613E+05  2.6879307E+05  2.6755573E+05  2.6632409E+05
  2.6509812E+05  2.6387779E+05  2.6266307E+05  2.6145395E+05
  2.6025040E+05  2.5905238E+05  2.5785988E+05  2.5667287E+05
  2.5549133E+05  2.5431522E+05  2.5314453E+05  2.5197922E+05
  2.5081928E+05  2.4966468E+05  2.4851540E+05  2.4737140E+05
  2.4623267E+05  2.4509919E+05  2.4397092E+05  2.4284784E+05
  2.4172994E+05  2.4061718E+05  2.3950954E+05  2.3840701E+05
  2.3730954E+05  2.3621713E+05  2.3512975E+05  2.3404737E+05
  2.3296998E+05  2.3189755E+05  2.3083005E+05  2.2976747E+05
  2.2870977E+05  2.2765695E+05  2.2660897E+05  2.2556582E+05
  2.2452747E+05  2.2349390E+05  2.2246509E+05  2.2144101E+05
  2.2042165E+05  2.1940698E+05  2.1839698E+05  2.1739163E+05
  2.1639091E+05  2.1539479E+05  2.1440326E+05  2.1341629E+05
  2.1243387E+05  2.1145597E+05  2.1048257E+05  2.0951366E+05
  2.0854920E+05  2.0758918E+05  2.0663358E+05  2.0568238E+05
  2.0473556E+05  2.0379310E+05  2.0285498E+05  2.0192117E+05
  2.0099166E+05  2.0006644E+05  1.9914547E+05  1.9822874E+05
  1.9731623E+05  1.9640792E+05  1.9550379E+05  1.9460383E+05
  1.9370800E+05  1.9281630E+05  1.9192871E+05  1.9104520E+05
  1.9016576E+05  1.8929037E+05  1.8841900E+05  1.8755165E+05
  1.8668829E+05  1.8582891E+05  1.8497348E+05  1.8412199E+05
  1.8327442E+05  1.8243075E+05  1.8159096E+05  1.8075504E+05
  1.7992297E+05  1.7909473E+05  1.7827030E+05  1.7744966E+05
  1.7663281E+05  1.7581971E+05  1.7501036E+05  1.7420473E+05
  1.7340281E+05  1.7260458E+05  1.7181003E+05  1.7101913E+05
  1.7023188E+05  1.6944825E+05  1.6866822E+05  1.6789179E+05
  1.6711893E+05  1.6634963E+05  1.6558387E+05  1.6482163E+05
  1.6406291E+05  1.6330768E+05  1.6255592E+05  1.6180762E+05
  1.6106277E+05  1.6032135E+05  1.5958334E+05  1.5884873E+05
  1.5811750E+05  1.5738963E+05  1.5666512E+05  1.5594394E+05
  1.5522608E+05  1.5451152E+05  1.5380026E+05  1.5309227E+05
  1.5238754E+05  1.5168605E+05  1.5098779E+05  1.5029275E+05
  1.4960090E+05  1.4891224E+05  1.4822675E+05  1.4754442E+05
  1.4686522E+05  1.4618916E+05  1.4551620E+05  1.4484634E+05
  1.4417957E+05  1.4351587E+05  1.4285522E+05  1.4219761E+05
  1.4154303E+05  1.4089146E+05  1.4024290E+05  1.3959731E+05
  1.3895470E+05  1.3831505E+05  1.3767834E+05  1.3704457E+05
  1.3641371E+05  1.3578575E+05  1.3516069E+05  1.3453850E+05
  1.3391918E+05  1.3330270E+05  1.3268907E+05  1.3207826E+05
  1.3147026E+05  1.3086506E+05  1.3026265E+05  1.2966301E+05
  1.2906613E+05  1.2847200E+05  1.2788060E+05  1.2729193E+05
  1.2670596E+05  1.2612269E+05  1.2554211E+05  1.2496420E+05
  1.2438895E+05  1.2381635E+05  1.2324639E+05  1.2267904E+05
  1.2211431E+05  1.2155218E+05  1.2099264E+05  1.2043567E+05
  1.1988127E+05  1.1932942E+05  1.1878011E+05  1.1823332E+05
  1.1768906E+05  1.1714730E+05  1.1660803E+05  1.1607125E+05
  1.1553694E+05  1.1500508E+05  1.1447568E+05  1.1394871E+05
  1.1342417E+05  1.1290204E+05  1.1238232E+05  1.1186499E+05
  1.1135004E+05  1.1083746E+05  1.1032724E+05  1.0981937E+05
  1.0931384E+05  1.0881063E+05  1.0830974E+05  1.0781116E+05
  1.0731487E+05  1.0682086E+05  1.0632913E+05  1.0583967E+05
  1.0535245E+05  1.0486748E+05  1.0438474E+05  1.0390423E+05
  1.0342592E+05  1.0294982E+05  1.0247591E+05  1.0200418E+05
  1.0153463E+05  1.0106723E+05  1.0057420E+05  1.0011119E+05
  9.9650317E+04  9.9191555E+04  9.8734897E+04  9.8280331E+04
  9.7827845E+04  9.7377428E+04  9.6929067E+04  9.6482753E+04
  9.6038472E+04  9.5596214E+04  9.5155968E+04  9.4717721E+04
  9.4281463E+04  9.3847183E+04  9.3414870E+04  9.2984512E+04
  9.2556099E+04  9.2129619E+04  9.1705061E+04  9.1282416E+04
  9.0861671E+04  9.0442817E+04  9.0025843E+04  8.9610737E+04
  8.9197490E+04  8.8786091E+04  8.8376530E+04  8.7968795E+04
  8.7562878E+04  8.7158767E+04  8.6756452E+04  8.6355924E+04
  8.5957172E+04  8.5560185E+04  8.5164955E+04  8.4771471E+04
  8.4379722E+04  8.3989701E+04  8.3601395E+04  8.3214797E+04
  8.2829895E+04  8.2446681E+04  8.2065145E+04  8.1685277E+04
  8.1307069E+04  8.0930509E+04  8.0555590E+04  8.0182302E+04
  7.9810635E+04  7.9440580E+04  7.9072129E+04  7.8705272E+04
  7.8340000E+04  7.7976303E+04  7.7614174E+04  7.7253603E+04
  7.6894582E+04  7.6537101E+04  7.6181151E+04  7.5826725E+04
  7.5473813E+04  7.5122407E+04  7.4772499E+04  7.4424079E+04
  7.4077139E+04  7.3731672E+04  7.3387668E+04  7.3045119E+04
  7.2704017E+04  7.2364354E+04  7.2026122E+04  7.1689313E+04
  7.1353918E+04  7.1019930E+04  7.0687340E+04  7.0356141E+04
  7.0026324E+04  6.9697883E+04  6.9370809E+04  6.9045094E+04
  6.8720731E+04  6.8397713E+04  6.8076031E+04  6.7755678E+04
  6.7436646E+04  6.7118929E+04  6.6802519E+04  6.6487408E+04
  6.6173590E+04  6.5861056E+04  6.5549800E+04  6.5239814E+04
  6.4931092E+04  6.4623626E+04  6.4317409E+04  6.4012435E+04
  6.3708696E+04  6.3406186E+04  6.3104897E+04  6.2804823E+04
  6.2505957E+04  6.2208293E+04  6.1911823E+04  6.1616542E+04
  6.1322442E+04  6.1029517E+04  6.0737760E+04  6.0447165E+04
  6.0157726E+04  5.9869437E+04  5.9582290E+04  5.9296280E+04
  5.9011400E+04  5.8727645E+04  5.8445007E+04  5.8163482E+04
  5.7883062E+04  5.7603742E+04  5.7325517E+04  5.7048379E+04
  5.6772323E+04  5.6497343E+04  5.6223434E+04  5.5950589E+04
  5.5678803E+04  5.5408070E+04  5.5138385E+04  5.4869741E+04
  5.4602134E+04  5.4335558E+04  5.4070006E+04  5.3805475E+04
  5.3541958E+04  5.3279450E+04  5.3017946E+04  5.2757440E+04
  5.2497927E+04  5.2239402E+04  5.1981859E+04  5.1725294E+04
  5.1469702E+04  5.1215077E+04  5.0961414E+04  5.0708709E+04
  5.0456956E+04  5.0206150E+04  4.9956288E+04  4.9707362E+04
  4.9459370E+04  4.9212306E+04  4.8966166E+04  4.8720944E+04
  4.8476636E+04  4.8233238E+04  4.7990744E+04  4.7749151E+04
  4.7508454E+04  4.7268648E+04  4.7029729E+04  4.6791692E+04
  4.6554534E+04  4.6318249E+04  4.6082834E+04  4.5848284E+04
  4.5614595E+04  4.5381762E+04  4.5149783E+04  4.4918651E+04
  4.4688365E+04  4.4458918E+04  4.4230308E+04  4.4002530E+04
  4.3775581E+04  4.3549456E+04  4.3324151E+04  4.3099663E+04
  4.2875988E+04  4.2653122E+04  4.2431061E+04  4.2209802E+04
  4.1989341E+04  4.1769674E+04  4.1550797E+04  4.1332708E+04
  4.1115402E+04  4.0898875E+04  4.0683125E+04  4.0468148E+04
  4.0253940E+04  4.0040499E+04  3.9827820E+04  3.9615900E+04
  3.9404736E+04  3.9194325E+04  3.8984663E+04  3.8775748E+04
  3.8567575E+04  3.8360143E+04  3.8153447E+04  3.7947484E+04
  3.7742252E+04  3.7537748E+04  3.7333968E+04  3.7130909E+04
  3.6928569E+04  3.6726944E+04  3.6526032E+04  3.6325829E+04
  3.6126334E+04  3.5927542E+04  3.5729452E+04  3.5532060E+04
  3.5335364E+04  3.5139361E+04  3.4944048E+04  3.4749423E+04
  3.4555483E+04  3.4362226E+04  3.4169648E+04  3.3977748E+04
  3.3786522E+04  3.3595969E+04  3.3406085E+04  3.3216869E+04
  3.3028318E+04  3.2840429E+04  3.2653201E+04  3.2466630E+04
  3.2280715E+04  3.2095453E+04  3.1910842E+04  3.1726879E+04
  3.1543563E+04  3.1360892E+04  3.1178862E+04  3.0997473E+04
  3.0816721E+04  3.0636605E+04  3.0457122E+04  3.0278272E+04
  3.0100050E+04  2.9922457E+04  2.9745488E+04  2.9569144E+04
  2.9393421E+04  2.9218318E+04  2.9043833E+04  2.8869963E+04
  2.8696708E+04  2.8524065E+04  2.8352033E+04  2.8180609E+04
  2.8009792E+04  2.7839581E+04  2.7669973E+04  2.7500967E+04
  2.7332561E+04  2.7164753E+04  2.6997542E+04  2.6830927E+04
  2.6664905E+04  2.6499475E+04  2.6334635E+04  2.6170385E+04
  2.6006721E+04  2.5843644E+04  2.5681152E+04  2.5519242E+04
  2.5357914E+04  2.5197166E+04  2.5036996E+04  2.4877404E+04
  2.4718389E+04  2.4559947E+04  2.4402079E+04  2.4244783E+04
  2.4088058E+04  2.3931902E+04  2.3776315E+04  2.3621294E+04
  2.3466840E+04  2.3312949E+04  2.3159622E+04  2.3006858E+04
  2.2854654E+04  2.2703010E+04  2.2551925E+04  2.2401398E+04
  2.2251427E+04  2.2102012E+04  2.1953151E+04  2.1804844E+04
  2.1657089E+04  2.1509885E+04  2.1363232E+04  2.1217128E+04
  2.1071573E+04  2.0926565E+04  2.0782104E+04  2.0638189E+04
  2.0494818E+04  2.0351991E+04  2.0209707E+04  2.0067966E+04
  1.9926765E+04  1.9786105E+04  1.9645985E+04  1.9506403E+04
  1.9367360E+04  1.9228853E+04  1.9090884E+04  1.8953449E+04
  1.8816550E+04  1.8680185E+04  1.8544354E+04  1.8409056E+04
  1.8274289E+04  1.8140054E+04  1.8006350E+04  1.7873176E+04
  1.7740531E+04  1.7608415E+04  1.7476828E+04  1.7345768E+04
  1.7215235E+04  1.7085228E+04  1.6955747E+04  1.6826791E+04
  1.6698360E+04  1.6570453E+04  1.6443070E+04  1.6316210E+04
  1.6189872E+04  1.6064056E+04  1.5938762E+04  1.5813988E+04
  1.5689735E+04  1.5566002E+04  1.5442789E+04  1.5320095E+04
  1.5197919E+04  1.5076262E+04  1.4955123E+04  1.4834500E+04
  1.4714395E+04  1.4594806E+04  1.4475733E+04  1.4357176E+04
  1.4239134E+04  1.4121608E+04  1.4004595E+04  1.3888097E+04
  1.3772113E+04  1.3656642E+04  1.3541684E+04  1.3427239E+04
  1.3313306E+04  1.3199886E+04  1.3086977E+04  1.2974579E+04
  1.2862693E+04  1.2751318E+04  1.2640452E+04  1.2530098E+04
  1.2420253E+04  1.2310917E+04  1.2202091E+04  1.2093774E+04
  1.1985966E+04  1.1878666E+04  1.1771875E+04  1.1665591E+04
  1.1559815E+04  1.1454546E+04  1.1349785E+04  1.1245530E+04
  1.1141782E+04  1.1038541E+04  1.0935805E+04  1.0833576E+04
  1.0731852E+04  1.0630634E+04  1.0529921E+04  1.0429712E+04
  1.0330009E+04  1.0230810E+04  1.0132115E+04  1.0033924E+04
  9.9362372E+03  9.8390538E+03  9.7423738E+03  9.6461969E+03
  9.5505228E+03  9.4553515E+03  9.3606826E+03  9.2665159E+03
  9.1728512E+03  9.0796883E+03  8.9870270E+03  8.8948670E+03
  8.8032081E+03  8.7120501E+03  8.6213927E+03  8.5312358E+03
  8.4415790E+03  8.3524222E+03  8.2637652E+03  8.1756076E+03
  8.0879493E+03  8.0007900E+03  7.9141296E+03  7.8279676E+03
  7.7423040E+03  7.6571384E+03  7.5724706E+03  7.4883003E+03
  7.4046274E+03  7.3214515E+03  7.2387724E+03  7.1565897E+03
  7.0749033E+03  6.9937129E+03  6.9130182E+03  6.8328188E+03
  6.7531146E+03  6.6739052E+03  6.5951904E+03  6.5169698E+03
  6.4392431E+03  6.3620101E+03  6.2852704E+03  6.2090236E+03
  6.1332696E+03  6.0580078E+03  5.9832381E+03  5.9089601E+03
  5.8351733E+03  5.7618775E+03  5.6890724E+03  5.6167574E+03
  5.5449324E+03  5.4735968E+03  5.4027503E+03  5.3323925E+03
  5.2625230E+03  5.1931413E+03  5.1242472E+03  5.0558401E+03
  4.9879197E+03  4.9204854E+03  4.8535368E+03  4.7870736E+03
  4.7210951E+03  4.6556010E+03  4.5905908E+03  4.5260639E+03
  4.4620199E+03  4.3984582E+03  4.3353784E+03  4.2727799E+03
  4.2106622E+03  4.1490247E+03  4.0878669E+03  4.0271882E+03
  3.9669880E+03  3.9072658E+03  3.8480209E+03  3.7892528E+03
  3.7309607E+03  3.6731442E+03  3.6158025E+03  3.5589350E+03
  3.5025411E+03  3.4466199E+03  3.3911710E+03  3.3361935E+03
  3.2816868E+03  3.2276501E+03  3.1740828E+03  3.1209839E+03
  3.0683529E+03  3.0161888E+03  2.9644910E+03  2.9132587E+03
  2.8624909E+03  2.8121870E+03  2.7623460E+03  2.7129670E+03
  2.6640494E+03  2.6155920E+03  2.5675942E+03  2.5200548E+03
  2.4729731E+03  2.4263481E+03  2.3801788E+03  2.3344643E+03
  2.2892035E+03  2.2443956E+03  2.2000394E+03  2.1561339E+03
  2.1126781E+03  2.0696710E+03  2.0271114E+03  1.9849983E+03
  1.9433306E+03  1.9021071E+03  1.8613267E+03  1.8209882E+03
  1.7810905E+03  1.7416323E+03  1.7026125E+03  1.6640299E+03
  1.6258831E+03  1.5881710E+03  1.5508922E+03  1.5140454E+03
  1.4776294E+03  1.4416428E+03  1.4060843E+03  1.3709525E+03
  1.3362459E+03  1.3019632E+03  1.2681031E+03  1.2346639E+03
  1.2016443E+03  1.1690427E+03  1.1368578E+03  1.1050878E+03
  1.0737314E+03  1.0427869E+03  1.0122528E+03  9.8212748E+02
  9.5240927E+02  9.2309654E+02  8.9418765E+02  8.6568090E+02
  8.3757458E+02  8.0986698E+02  7.8255633E+02  7.5564088E+02
  7.2911883E+02  7.0298836E+02  6.7724764E+02  6.5189482E+02
  6.2692801E+02  6.0234531E+02  5.7814480E+02  5.5432453E+02
  5.3088254E+02  5.0781682E+02  4.8512536E+02  4.6280613E+02
  4.4085705E+02  4.1927606E+02  3.9806102E+02  3.7720982E+02
  3.5672029E+02  3.3659026E+02  3.1681751E+02  2.9739981E+02
  2.7833492E+02  2.5962054E+02  2.4125438E+02  2.2323411E+02
  2.0555737E+02  1.8822178E+02  1.7122494E+02  1.5456440E+02
  1.3823773E+02  1.2224242E+02  1.0657598E+02  9.1235872E+01
  7.6219526E+01  6.1524359E+01  4.7147753E+01  3.3087068E+01
  1.9339634E+01  5.9027552E+00 -7.2262918E+00 -2.0050258E+01
 -3.2571922E+01 -4.4794090E+01 -5.6719596E+01 -6.8351302E+01
 -7.9692099E+01 -9.0744905E+01 -1.0151267E+02 -1.1199836E+02
 -1.2220500E+02 -1.3213560E+02 -1.4179324E+02 -1.5118100E+02
 -1.6030201E+02 -1.6915941E+02 -1.7775640E+02 -1.8609617E+02
 -1.9418197E+02 -2.0201707E+02 -2.0960477E+02 -2.1694841E+02
 -2.2405133E+02 -2.3091694E+02 -2.3754867E+02 -2.4394995E+02
 -2.5012428E+02 -2.5607519E+02 -2.6180620E+02 -2.6732091E+02
 -2.7262293E+02 -2.7771590E+02 -2.8260350E+02 -2.8728943E+02
 -2.9177744E+02 -2.9607130E+02 -3.0017481E+02 -3.0409182E+02
 -3.0782619E+02 -3.1138184E+02 -3.1476269E+02 -3.1797272E+02
 -3.2101593E+02 -3.2389637E+02 -3.2661811E+02 -3.2918525E+02
 -3.3160193E+02 -3.3387233E+02 -3.3600067E+02 -3.3799117E+02
 -3.3984813E+02 -3.4157586E+02 -3.4317870E+02 -3.4466105E+02
 -3.4602731E+02 -3.4728195E+02 -3.4842946E+02 -3.4947436E+02
 -3.5042122E+02 -3.5127464E+02 -3.5203924E+02 -3.5271971E+02
 -3.5332075E+02 -3.5384711E+02 -3.5430356E+02 -3.5469494E+02
 -3.5502608E+02 -3.5530190E+02 -3.5552731E+02 -3.5570728E+02
 -3.5584683E+02 -3.5595100E+02 -3.5602487E+02 -3.5607356E+02
 -3.5610222E+02 -3.5611607E+02 -3.5612032E+02 -3.5616081E+02
 -3.5615857E+02 -3.5615425E+02 -3.5614785E+02 -3.5613940E+02
 -3.5612888E+02 -3.5611631E+02 -3.5610169E+02 -3.5608502E+02
 -3.5606631E+02 -3.5604556E+02 -3.5602278E+02 -3.5599798E+02
 -3.5597115E+02 -3.5594230E+02 -3.5591144E+02 -3.5587857E+02
 -3.5584370E+02 -3.5580683E+02 -3.5576797E+02 -3.5572712E+02
 -3.5568428E+02 -3.5563946E+02 -3.5559267E+02 -3.5554391E+02
 -3.5549318E+02 -3.5544049E+02 -3.5538585E+02 -3.5532926E+02
 -3.5527071E+02 -3.5521023E+02 -3.5514781E+02 -3.5508346E+02
 -3.5501718E+02 -3.5494898E+02 -3.5487886E+02 -3.5480682E+02
 -3.5473288E+02 -3.5465704E+02 -3.5457929E+02 -3.5449966E+02
 -3.5441813E+02 -3.5433472E+02 -3.5424942E+02 -3.5416226E+02
 -3.5407322E+02 -3.5398232E+02 -3.5388955E+02 -3.5379493E+02
 -3.5369846E+02 -3.5360014E+02 -3.5349998E+02 -3.5339799E+02
 -3.5329416E+02 -3.5318850E+02 -3.5308102E+02 -3.5297172E+02
 -3.5286061E+02 -3.5274769E+02 -3.5263297E+02 -3.5251644E+02
 -3.5239812E+02 -3.5227802E+02 -3.5215613E+02 -3.5203245E+02
 -3.5190701E+02 -3.5177979E+02 -3.5165080E+02 -3.5152006E+02
 -3.5138756E+02 -3.5125331E+02 -3.5111731E+02 -3.5097956E+02
 -3.5084008E+02 -3.5069887E+02 -3.5055593E+02 -3.5041127E+02
 -3.5026489E+02 -3.5011679E+02 -3.4996699E+02 -3.4981548E+02
 -3.4966228E+02 -3.4950737E+02 -3.4935078E+02 -3.4919251E+02
 -3.4903255E+02 -3.4887092E+02 -3.4870761E+02 -3.4854264E+02
 -3.4837601E+02 -3.4820773E+02 -3.4803779E+02 -3.4786620E+02
 -3.4769297E+02 -3.4751811E+02 -3.4734161E+02 -3.4716348E+02
 -3.4698373E+02 -3.4680236E+02 -3.4661938E+02 -3.4643479E+02
 -3.4624859E+02 -3.4606080E+02 -3.4587141E+02 -3.4568043E+02
 -3.4548786E+02 -3.4529371E+02 -3.4509799E+02 -3.4490070E+02
 -3.4470184E+02 -3.4450142E+02 -3.4429944E+02 -3.4409591E+02
 -3.4389083E+02 -3.4368421E+02 -3.4347606E+02 -3.4326637E+02
 -3.4305515E+02 -3.4284240E+02 -3.4262814E+02 -3.4241237E+02
 -3.4219508E+02 -3.4197629E+02 -3.4175601E+02 -3.4153422E+02
 -3.4131095E+02 -3.4108619E+02 -3.4085995E+02 -3.4063223E+02
 -3.4040304E+02 -3.4017239E+02 -3.3994027E+02 -3.3970670E+02
 -3.3947167E+02 -3.3923520E+02 -3.3899729E+02 -3.3875793E+02
 -3.3851714E+02 -3.3827493E+02 -3.3803129E+02 -3.3778623E+02
 -3.3753976E+02 -3.3729188E+02 -3.3704259E+02 -3.3679190E+02
 -3.3653982E+02 -3.3628635E+02 -3.3603149E+02 -3.3577525E+02
 -3.3551763E+02 -3.3525865E+02 -3.3499829E+02 -3.3473658E+02
 -3.3447350E+02 -3.3420908E+02 -3.3394330E+02 -3.3367619E+02
 -3.3340773E+02 -3.3313794E+02 -3.3286683E+02 -3.3259439E+02
 -3.3232063E+02 -3.3204555E+02 -3.3176917E+02 -3.3149148E+02
 -3.3121249E+02 -3.3093220E+02 -3.3065063E+02 -3.3036777E+02
 -3.3008362E+02 -3.2979820E+02 -3.2951151E+02 -3.2922355E+02
 -3.2893433E+02 -3.2864385E+02 -3.2835212E+02 -3.2805914E+02
 -3.2776492E+02 -3.2746946E+02 -3.2717277E+02 -3.2687484E+02
 -3.2657570E+02 -3.2627533E+02 -3.2597375E+02 -3.2567096E+02
 -3.2536696E+02 -3.2506176E+02 -3.2475537E+02 -3.2444779E+02
 -3.2413902E+02 -3.2382906E+02 -3.2351794E+02 -3.2320564E+02
 -3.2289217E+02 -3.2257754E+02 -3.2226175E+02 -3.2194481E+02
 -3.2162672E+02 -3.2130749E+02 -3.2098712E+02 -3.2066561E+02
 -3.2034298E+02 -3.2001922E+02 -3.1969434E+02 -3.1936835E+02
 -3.1904125E+02 -3.1871304E+02 -3.1838373E+02 -3.1805332E+02
 -3.1772183E+02 -3.1738924E+02 -3.1705558E+02 -3.1672084E+02
 -3.1638502E+02 -3.1604814E+02 -3.1571020E+02 -3.1537120E+02
 -3.1503114E+02 -3.1469004E+02 -3.1434789E+02 -3.1400470E+02
 -3.1366048E+02 -3.1331523E+02 -3.1296896E+02 -3.1262167E+02
 -3.1227336E+02 -3.1192404E+02 -3.1157371E+02 -3.1122238E+02
 -3.1087006E+02 -3.1051675E+02 -3.1016245E+02 -3.0980716E+02
 -3.0945090E+02 -3.0909367E+02 -3.0873547E+02 -3.0837631E+02
 -3.0801619E+02 -3.0765511E+02 -3.0729309E+02 -3.0693013E+02
 -3.0656622E+02 -3.0620138E+02 -3.0583561E+02 -3.0546891E+02
 -3.0510130E+02 -3.0473277E+02 -3.0436333E+02 -3.0399298E+02
 -3.0362173E+02 -3.0324959E+02 -3.0287655E+02 -3.0250263E+02
 -3.0212782E+02 -3.0175214E+02 -3.0137558E+02 -3.0099816E+02
 -3.0061988E+02 -3.0024073E+02 -2.9986073E+02 -2.9947989E+02
 -2.9909819E+02 -2.9871566E+02 -2.9833230E+02 -2.9794810E+02
 -2.9756308E+02 -2.9717724E+02 -2.9679059E+02 -2.9640312E+02
 -2.9601485E+02 -2.9562577E+02 -2.9523590E+02 -2.9484524E+02
 -2.9445379E+02 -2.9406155E+02 -2.9366854E+02 -2.9327476E+02
 -2.9288021E+02 -2.9248489E+02 -2.9208882E+02 -2.9169199E+02
 -2.9129442E+02 -2.9089610E+02 -2.9049704E+02 -2.9009724E+02
 -2.8969672E+02 -2.8929547E+02 -2.8889350E+02 -2.8849081E+02
 -2.8808741E+02 -2.8768331E+02 -2.8727850E+02 -2.8687300E+02
 -2.8646681E+02 -2.8605992E+02 -2.8565236E+02 -2.8524412E+02
 -2.8483520E+02 -2.8442562E+02 -2.8401537E+02 -2.8360446E+02
 -2.8319290E+02 -2.8278069E+02 -2.8236784E+02 -2.8195434E+02
 -2.8154021E+02 -2.8112546E+02 -2.8071007E+02 -2.8029406E+02
 -2.7987744E+02 -2.7946021E+02 -2.7904237E+02 -2.7862393E+02
 -2.7820489E+02 -2.7778526E+02 -2.7736504E+02 -2.7694424E+02
 -2.7652286E+02 -2.7610090E+02 -2.7567838E+02 -2.7525530E+02
 -2.7483165E+02 -2.7440746E+02 -2.7398271E+02 -2.7355741E+02
 -2.7313158E+02 -2.7270521E+02 -2.7227831E+02 -2.7185089E+02
 -2.7142294E+02 -2.7099448E+02 -2.7056551E+02 -2.7013603E+02
 -2.6970605E+02 -2.6927557E+02 -2.6884459E+02 -2.6841313E+02
 -2.6798119E+02 -2.6754877E+02 -2.6711587E+02 -2.6668251E+02
 -2.6624868E+02 -2.6581440E+02 -2.6537966E+02 -2.6494446E+02
 -2.6450883E+02 -2.6407275E+02 -2.6363624E+02 -2.6319930E+02
 -2.6276193E+02 -2.6232414E+02 -2.6188593E+02 -2.6144731E+02
 -2.6100829E+02 -2.6056886E+02 -2.6012903E+02 -2.5968882E+02
 -2.5924821E+02 -2.5880722E+02 -2.5836585E+02 -2.5792411E+02
 -2.5748200E+02 -2.5703953E+02 -2.5659669E+02 -2.5615350E+02
 -2.5570996E+02 -2.5526608E+02 -2.5482185E+02 -2.5437729E+02
 -2.5393240E+02 -2.5348718E+02 -2.5304164E+02 -2.5259579E+02
 -2.5214962E+02 -2.5170314E+02 -2.5125637E+02 -2.5080929E+02
 -2.5036192E+02 -2.4991427E+02 -2.4946633E+02 -2.4901811E+02
 -2.4856961E+02 -2.4812085E+02 -2.4767182E+02 -2.4722254E+02
 -2.4677300E+02 -2.4632320E+02 -2.4587317E+02 -2.4542289E+02
 -2.4497238E+02 -2.4452163E+02 -2.4407066E+02 -2.4361947E+02
 -2.4316806E+02 -2.4271643E+02 -2.4226460E+02 -2.4181257E+02
 -2.4136034E+02 -2.4090792E+02 -2.4045530E+02 -2.4000251E+02
 -2.3954953E+02 -2.3909638E+02 -2.3864306E+02 -2.3818958E+02
 -2.3773594E+02 -2.3728214E+02 -2.3682819E+02 -2.3637410E+02
 -2.3591986E+02 -2.3546549E+02 -2.3501098E+02 -2.3455635E+02
 -2.3410160E+02 -2.3364673E+02 -2.3319175E+02 -2.3273666E+02
 -2.3228147E+02 -2.3182618E+02 -2.3137080E+02 -2.3091532E+02
 -2.3045977E+02 -2.3000413E+02 -2.2954842E+02 -2.2909264E+02
 -2.2863680E+02 -2.2818089E+02 -2.2772493E+02 -2.2726892E+02
 -2.2681286E+02 -2.2635676E+02 -2.2590063E+02 -2.2544446E+02
 -2.2498827E+02 -2.2453205E+02 -2.2407582E+02 -2.2361958E+02
 -2.2316332E+02 -2.2270707E+02 -2.2225081E+02 -2.2179456E+02
 -2.2133832E+02 -2.2088210E+02 -2.2042590E+02 -2.1996973E+02
 -2.1951358E+02 -2.1905747E+02 -2.1860140E+02 -2.1814537E+02
 -2.1768939E+02 -2.1723347E+02 -2.1677760E+02 -2.1632180E+02
 -2.1586607E+02 -2.1541041E+02 -2.1495482E+02 -2.1449932E+02
 -2.1404391E+02 -2.1358859E+02 -2.1313336E+02 -2.1267824E+02
 -2.1222322E+02 -2.1176831E+02 -2.1131352E+02 -2.1085885E+02
 -2.1040430E+02 -2.0994988E+02 -2.0949560E+02 -2.0904146E+02
 -2.0858746E+02 -2.0813361E+02 -2.0767992E+02 -2.0722638E+02
 -2.0677301E+02 -2.0631980E+02 -2.0586677E+02 -2.0541391E+02
 -2.0496123E+02 -2.0450875E+02 -2.0405645E+02 -2.0360435E+02
 -2.0315245E+02 -2.0270076E+02 -2.0224928E+02 -2.0179801E+02
 -2.0134697E+02 -2.0089615E+02 -2.0044555E+02 -1.9999520E+02
 -1.9954508E+02 -1.9909520E+02 -1.9864558E+02 -1.9819621E+02
 -1.9774709E+02 -1.9729824E+02 -1.9684966E+02 -1.9640135E+02
 -1.9595331E+02 -1.9550556E+02 -1.9505809E+02 -1.9461092E+02
 -1.9416404E+02 -1.9371747E+02 -1.9327119E+02 -1.9282523E+02
 -1.9237959E+02 -1.9193426E+02 -1.9148926E+02 -1.9104459E+02
 -1.9060025E+02 -1.9015625E+02 -1.8971260E+02 -1.8926929E+02
 -1.8882634E+02 -1.8838374E+02 -1.8794151E+02 -1.8749964E+02
 -1.8705815E+02 -1.8661703E+02 -1.8617630E+02 -1.8573595E+02
 -1.8529599E+02 -1.8485643E+02 -1.8441727E+02 -1.8397852E+02
 -1.8354017E+02 -1.8310224E+02 -1.8266473E+02 -1.8222765E+02
 -1.8179099E+02 -1.8135477E+02 -1.8091898E+02 -1.8048364E+02
 -1.8004875E+02 -1.7961431E+02 -1.7918033E+02 -1.7874681E+02
 -1.7831376E+02 -1.7788118E+02 -1.7744907E+02 -1.7701745E+02
 -1.7658632E+02 -1.7615567E+02 -1.7572552E+02 -1.7529587E+02
 -1.7486673E+02 -1.7443810E+02 -1.7400998E+02 -1.7358238E+02
 -1.7315530E+02 -1.7272876E+02 -1.7230275E+02 -1.7187727E+02
 -1.7145234E+02 -1.7102796E+02 -1.7060413E+02 -1.7018085E+02
 -1.6975814E+02 -1.6933600E+02 -1.6891443E+02 -1.6849343E+02
 -1.6807302E+02 -1.6765319E+02 -1.6723395E+02 -1.6681531E+02
 -1.6639727E+02 -1.6597983E+02 -1.6556301E+02 -1.6514680E+02
 -1.6473120E+02 -1.6431623E+02 -1.6390189E+02 -1.6348819E+02
 -1.6307512E+02 -1.6266269E+02 -1.6225091E+02 -1.6183979E+02
 -1.6142932E+02 -1.6101951E+02 -1.6061037E+02 -1.6020191E+02
 -1.5979411E+02 -1.5938700E+02 -1.5898058E+02 -1.5857484E+02
 -1.5816980E+02 -1.5776547E+02 -1.5736183E+02 -1.5695891E+02
 -1.5655669E+02 -1.5615520E+02 -1.5575444E+02 -1.5535440E+02
 -1.5495509E+02 -1.5455652E+02 -1.5415870E+02 -1.5376162E+02
 -1.5336529E+02 -1.5296972E+02 -1.5257492E+02 -1.5218088E+02
 -1.5178761E+02 -1.5139511E+02 -1.5100340E+02 -1.5061248E+02
 -1.5022234E+02 -1.4983300E+02 -1.4944446E+02 -1.4905672E+02
 -1.4866979E+02 -1.4828368E+02 -1.4789838E+02 -1.4751391E+02
 -1.4713027E+02 -1.4674746E+02 -1.4636548E+02 -1.4598435E+02
 -1.4560407E+02 -1.4522464E+02 -1.4484607E+02 -1.4446836E+02
 -1.4409151E+02 -1.4371554E+02 -1.4334044E+02 -1.4296622E+02
 -1.4259288E+02 -1.4222044E+02 -1.4184889E+02 -1.4147824E+02
 -1.4110850E+02 -1.4073966E+02 -1.4037174E+02 -1.4000474E+02
 -1.3963866E+02 -1.3927351E+02 -1.3890929E+02 -1.3854601E+02
 -1.3818367E+02 -1.3782228E+02 -1.3746184E+02 -1.3710235E+02
 -1.3674383E+02 -1.3638628E+02 -1.3602969E+02 -1.3567408E+02
 -1.3531945E+02 -1.3496581E+02 -1.3461315E+02 -1.3426149E+02
 -1.3391083E+02 -1.3356117E+02 -1.3321253E+02 -1.3286489E+02
 -1.3251828E+02 -1.3217268E+02 -1.3182812E+02 -1.3148459E+02
 -1.3114584E+02 -1.3080439E+02 -1.3046397E+02 -1.3012459E+02
 -1.2978624E+02 -1.2944891E+02 -1.2911261E+02 -1.2877732E+02
 -1.2844305E+02 -1.2810980E+02 -1.2777755E+02 -1.2744630E+02
 -1.2711606E+02 -1.2678682E+02 -1.2645857E+02 -1.2613131E+02
 -1.2580503E+02 -1.2547975E+02 -1.2515544E+02 -1.2483211E+02
 -1.2450976E+02 -1.2418837E+02 -1.2386795E+02 -1.2354850E+02
 -1.2323001E+02 -1.2291247E+02 -1.2259589E+02 -1.2228026E+02
 -1.2196558E+02 -1.2165184E+02 -1.2133905E+02 -1.2102719E+02
 -1.2071626E+02 -1.2040627E+02 -1.2009721E+02 -1.1978907E+02
 -1.1948185E+02 -1.1917555E+02 -1.1887017E+02 -1.1856570E+02
 -1.1826214E+02 -1.1795949E+02 -1.1765774E+02 -1.1735689E+02
 -1.1705693E+02 -1.1675787E+02 -1.1645970E+02 -1.1616242E+02
 -1.1586603E+02 -1.1557051E+02 -1.1527588E+02 -1.1498212E+02
 -1.1468924E+02 -1.1439722E+02 -1.1410607E+02 -1.1381579E+02
 -1.1352636E+02 -1.1323780E+02 -1.1295009E+02 -1.1266323E+02
 -1.1237722E+02 -1.1209206E+02 -1.1180775E+02 -1.1152427E+02
 -1.1124163E+02 -1.1095983E+02 -1.1067886E+02 -1.1039872E+02
 -1.1011941E+02 -1.0984092E+02 -1.0956325E+02 -1.0928640E+02
 -1.0901036E+02 -1.0873514E+02 -1.0846073E+02 -1.0818713E+02
 -1.0791433E+02 -1.0764234E+02 -1.0737114E+02 -1.0710074E+02
 -1.0683114E+02 -1.0656232E+02 -1.0629430E+02 -1.0602706E+02
 -1.0576060E+02 -1.0549493E+02 -1.0523003E+02 -1.0496591E+02
 -1.0470257E+02 -1.0443999E+02 -1.0417818E+02 -1.0391714E+02
 -1.0365686E+02 -1.0339734E+02 -1.0313857E+02 -1.0288056E+02
 -1.0262331E+02 -1.0236681E+02 -1.0211105E+02 -1.0185604E+02
 -1.0160177E+02 -1.0134824E+02 -1.0109545E+02 -1.0084339E+02
 -1.0059207E+02 -1.0034148E+02 -1.0009161E+02 -9.9842472E+01
 -9.9594057E+01 -9.9346362E+01 -9.9099385E+01 -9.8853125E+01
 -9.8607578E+01 -9.8362742E+01 -9.8118615E+01 -9.7875195E+01
 -9.7632480E+01 -9.7390466E+01 -9.7149151E+01 -9.6908534E+01
 -9.6668612E+01 -9.6429383E+01 -9.6190844E+01 -9.5952994E+01
 -9.5715829E+01 -9.5479348E+01 -9.5243548E+01 -9.5008427E+01
 -9.4773983E+01 -9.4540214E+01 -9.4307117E+01 -9.4074690E+01
 -9.3842932E+01 -9.3611839E+01 -9.3381410E+01 -9.3151643E+01
 -9.2922534E+01 -9.2694083E+01 -9.2466287E+01 -9.2239144E+01
 -9.2012651E+01 -9.1786807E+01 -9.1561610E+01 -9.1337057E+01
 -9.1113146E+01 -9.0889875E+01 -9.0667242E+01 -9.0445245E+01
 -9.0223882E+01 -9.0003151E+01 -8.9783050E+01 -8.9563576E+01
 -8.9344728E+01 -8.9126504E+01 -8.8908901E+01 -8.8691918E+01
 -8.8475552E+01 -8.8259802E+01 -8.8044666E+01 -8.7830141E+01
 -8.7616225E+01 -8.7402918E+01 -8.7190215E+01 -8.6978117E+01
 -8.6766620E+01 -8.6555723E+01 -8.6345424E+01 -8.6135720E+01
 -8.5926611E+01 -8.5718093E+01 -8.5510166E+01 -8.5302827E+01
 -8.5096074E+01 -8.4889905E+01 -8.4684320E+01 -8.4479314E+01
 -8.4274888E+01 -8.4071038E+01 -8.3867763E+01 -8.3665062E+01
 -8.3462932E+01 -8.3261371E+01 -8.3060378E+01 -8.2859951E+01
 -8.2660088E+01 -8.2460787E+01 -8.2262047E+01 -8.2063865E+01
 -8.1866240E+01 -8.1669169E+01 -8.1472653E+01 -8.1276687E+01
 -8.1081272E+01 -8.0886404E+01 -8.0692082E+01 -8.0498305E+01
 -8.0305070E+01 -8.0112377E+01 -7.9920223E+01 -7.9728606E+01
 -7.9537525E+01 -7.9346978E+01 -7.9156963E+01 -7.8967479E+01
 -7.8778524E+01 -7.8590096E+01 -7.8402194E+01 -7.8214816E+01
 -7.8027960E+01 -7.7841625E+01 -7.7655808E+01 -7.7470509E+01
 -7.7285726E+01 -7.7101456E+01 -7.6917699E+01 -7.6734453E+01
 -7.6551716E+01 -7.6369486E+01 -7.6187762E+01 -7.6006542E+01
 -7.5825826E+01 -7.5645610E+01 -7.5465894E+01 -7.5286675E+01
 -7.5107953E+01 -7.4929726E+01 -7.4751992E+01 -7.4574750E+01
 -7.4397997E+01 -7.4221734E+01 -7.4045957E+01 -7.3870666E+01
 -7.3695859E+01 -7.3521534E+01 -7.3347690E+01 -7.3174325E+01
 -7.3001439E+01 -7.2829028E+01 -7.2657093E+01 -7.2485631E+01
 -7.2314640E+01 -7.2144121E+01 -7.1974070E+01 -7.1804486E+01
 -7.1635369E+01 -7.1466716E+01 -7.1298526E+01 -7.1130798E+01
 -7.0963530E+01 -7.0796720E+01 -7.0630368E+01 -7.0464472E+01
 -7.0299030E+01 -7.0134041E+01 -6.9969504E+01 -6.9805417E+01
 -6.9641779E+01 -6.9478588E+01 -6.9315843E+01 -6.9153542E+01
 -6.8991685E+01 -6.8830269E+01 -6.8669294E+01 -6.8508758E+01
 -6.8348660E+01 -6.8188998E+01 -6.8029771E+01 -6.7870978E+01
 -6.7712617E+01 -6.7554686E+01 -6.7397186E+01 -6.7240113E+01
 -6.7083468E+01 -6.6927248E+01 -6.6771452E+01 -6.6616079E+01
 -6.6461128E+01 -6.6306598E+01 -6.6152486E+01 -6.5998792E+01
 -6.5845514E+01 -6.5692652E+01 -6.5540203E+01 -6.5388167E+01
 -6.5236543E+01 -6.5085328E+01 -6.4934522E+01 -6.4784124E+01
 -6.4634132E+01 -6.4484545E+01 -6.4335361E+01 -6.4186580E+01
 -6.4038201E+01 -6.3890221E+01 -6.3742640E+01 -6.3595457E+01
 -6.3448670E+01 -6.3302278E+01 -6.3156280E+01 -6.3010675E+01
 -6.2865462E+01 -6.2720638E+01 -6.2576204E+01 -6.2432157E+01
 -6.2288498E+01 -6.2145223E+01 -6.2002333E+01 -6.1859827E+01
 -6.1717702E+01 -6.1575958E+01 -6.1434594E+01 -6.1293608E+01
 -6.1152999E+01 -6.1012767E+01 -6.0872910E+01 -6.0733426E+01
 -6.0594316E+01 -6.0455577E+01 -6.0317208E+01 -6.0179209E+01
 -6.0041578E+01 -5.9904314E+01 -5.9767416E+01 -5.9630883E+01
 -5.9494713E+01 -5.9358906E+01 -5.9223461E+01 -5.9088376E+01
 -5.8953651E+01 -5.8819284E+01 -5.8685274E+01 -5.8551620E+01
 -5.8418321E+01 -5.8285375E+01 -5.8152783E+01 -5.8020543E+01
 -5.7888653E+01 -5.7757113E+01 -5.7625921E+01 -5.7495077E+01
 -5.7364580E+01 -5.7234427E+01 -5.7104620E+01 -5.6975155E+01
 -5.6846033E+01 -5.6717252E+01 -5.6588812E+01 -5.6460710E+01
 -5.6332947E+01 -5.6205521E+01 -5.6078431E+01 -5.5951676E+01
 -5.5825256E+01 -5.5699168E+01 -5.5573413E+01 -5.5447989E+01
 -5.5322895E+01 -5.5198130E+01 -5.5073693E+01 -5.4949583E+01
 -5.4825800E+01 -5.4702341E+01 -5.4579207E+01 -5.4456396E+01
 -5.4333908E+01 -5.4211741E+01 -5.4089894E+01 -5.3968366E+01
 -5.3847157E+01 -5.3726265E+01 -5.3605690E+01 -5.3485431E+01
 -5.3365486E+01 -5.3245855E+01 -5.3126536E+01 -5.3007530E+01
 -5.2888834E+01 -5.2770449E+01 -5.2652372E+01 -5.2534603E+01
 -5.2417142E+01 -5.2299987E+01 -5.2183137E+01 -5.2066592E+01
 -5.1950350E+01 -5.1834411E+01 -5.1718774E+01 -5.1603438E+01
 -5.1488401E+01 -5.1373664E+01 -5.1259225E+01 -5.1145083E+01
 -5.1031238E+01 -5.0917688E+01 -5.0804433E+01 -5.0691471E+01
 -5.0578803E+01 -5.0466426E+01 -5.0354341E+01 -5.0242546E+01
 -5.0131040E+01 -5.0019823E+01 -4.9908894E+01 -4.9798252E+01
 -4.9687896E+01 -4.9577825E+01 -4.9468038E+01 -4.9358535E+01
 -4.9249315E+01 -4.9140376E+01 -4.9031719E+01 -4.8923341E+01
 -4.8815243E+01 -4.8707424E+01 -4.8599882E+01 -4.8492618E+01
 -4.8385629E+01 -4.8278916E+01 -4.8172477E+01 -4.8066312E+01
 -4.7960419E+01 -4.7854799E+01 -4.7749450E+01 -4.7644371E+01
 -4.7539563E+01 -4.7435023E+01 -4.7330751E+01 -4.7226746E+01
 -4.7123008E+01 -4.7019536E+01 -4.6916329E+01 -4.6813386E+01
 -4.6710706E+01 -4.6608289E+01 -4.6506134E+01 -4.6404240E+01
 -4.6302606E+01 -4.6201232E+01 -4.6100117E+01 -4.5999260E+01
 -4.5898660E+01 -4.5798317E+01 -4.5698230E+01 -4.5598397E+01
 -4.5498820E+01 -4.5399495E+01 -4.5300424E+01 -4.5201605E+01
 -4.5103037E+01 -4.5004719E+01 -4.4906652E+01 -4.4808834E+01
 -4.4711265E+01 -4.4613943E+01 -4.4516868E+01 -4.4420040E+01
 -4.4323457E+01 -4.4227119E+01 -4.4131025E+01 -4.4035175E+01
 -4.3939568E+01 -4.3844203E+01 -4.3749079E+01 -4.3654196E+01
 -4.3559552E+01 -4.3465148E+01 -4.3370983E+01 -4.3277056E+01
 -4.3183366E+01 -4.3089912E+01 -4.2996694E+01 -4.2903712E+01
 -4.2810964E+01 -4.2718450E+01 -4.2626168E+01 -4.2534120E+01
 -4.2442303E+01 -4.2350718E+01 -4.2259362E+01 -4.2168237E+01
 -4.2077341E+01 -4.1986673E+01 -4.1896234E+01 -4.1806021E+01
 -4.1716035E+01 -4.1626275E+01 -4.1536740E+01 -4.1447430E+01
 -4.1358344E+01 -4.1269481E+01 -4.1180840E+01 -4.1092422E+01
 -4.1004225E+01 -4.0916249E+01 -4.0828493E+01 -4.0740956E+01
 -4.0653639E+01 -4.0566539E+01 -4.0479658E+01 -4.0392993E+01
 -4.0306545E+01 -4.0220312E+01 -4.0134295E+01 -4.0048492E+01
 -3.9962903E+01 -3.9877527E+01 -3.9792364E+01 -3.9707414E+01
 -3.9622674E+01 -3.9538146E+01 -3.9453828E+01 -3.9369720E+01
 -3.9285821E+01 -3.9202130E+01 -3.9118647E+01 -3.9035372E+01
 -3.8952303E+01 -3.8869440E+01 -3.8786784E+01 -3.8704332E+01
 -3.8622084E+01 -3.8540040E+01 -3.8458200E+01 -3.8376562E+01
 -3.8295127E+01 -3.8213892E+01 -3.8132859E+01 -3.8052027E+01
 -3.7971394E+01 -3.7890960E+01 -3.7810725E+01 -3.7730688E+01
 -3.7650849E+01 -3.7571207E+01 -3.7491761E+01 -3.7412511E+01
 -3.7333457E+01 -3.7254597E+01 -3.7175932E+01 -3.7097461E+01
 -3.7019182E+01 -3.6941096E+01 -3.6863203E+01 -3.6785500E+01
 -3.6707989E+01 -3.6630669E+01 -3.6553538E+01 -3.6476597E+01
 -3.6399844E+01 -3.6323280E+01 -3.6246904E+01 -3.6170715E+01
 -3.6094713E+01 -3.6018897E+01 -3.5943267E+01 -3.5867822E+01
 -3.5792561E+01 -3.5717485E+01 -3.5642593E+01 -3.5567884E+01
 -3.5493357E+01 -3.5419012E+01 -3.5344849E+01 -3.5270867E+01
 -3.5197066E+01 -3.5123445E+01 -3.5050003E+01 -3.4976741E+01
 -3.4903657E+01 -3.4830751E+01 -3.4758023E+01 -3.4685472E+01
 -3.4613098E+01 -3.4540899E+01 -3.4468876E+01 -3.4397029E+01
 -3.4325356E+01 -3.4253857E+01 -3.4182532E+01 -3.4111380E+01
 -3.4040401E+01 -3.3969595E+01 -3.3898959E+01 -3.3828496E+01
 -3.3758203E+01 -3.3688080E+01 -3.3618127E+01 -3.3548344E+01
 -3.3478730E+01 -3.3409284E+01 -3.3340006E+01 -3.3270895E+01
 -3.3201952E+01 -3.3133176E+01 -3.3064565E+01 -3.2996120E+01
 -3.2927841E+01 -3.2859726E+01 -3.2791775E+01 -3.2723989E+01
 -3.2656366E+01 -3.2588905E+01 -3.2521608E+01 -3.2454472E+01
 -3.2387498E+01 -3.2320685E+01 -3.2254033E+01 -3.2187542E+01
 -3.2121210E+01 -3.2055037E+01 -3.1989024E+01 -3.1923169E+01
 -3.1857472E+01 -3.1791933E+01 -3.1726551E+01 -3.1661326E+01
 -3.1596258E+01 -3.1531345E+01 -3.1466588E+01 -3.1401986E+01
 -3.1337538E+01 -3.1273245E+01 -3.1209106E+01 -3.1145120E+01
 -3.1081287E+01 -3.1017607E+01 -3.0954079E+01 -3.0890703E+01
 -3.0827478E+01 -3.0764404E+01 -3.0701480E+01 -3.0638706E+01
 -3.0576083E+01 -3.0513608E+01 -3.0451282E+01 -3.0389105E+01
 -3.0327076E+01 -3.0265195E+01 -3.0203461E+01 -3.0141873E+01
 -3.0080432E+01 -3.0019138E+01 -2.9957988E+01 -2.9896985E+01
 -2.9836126E+01 -2.9775411E+01 -2.9714841E+01 -2.9654414E+01
 -2.9594131E+01 -2.9533990E+01 -2.9473992E+01 -2.9414136E+01
 -2.9354422E+01 -2.9294850E+01 -2.9235418E+01 -2.9176127E+01
 -2.9116976E+01 -2.9057965E+01 -2.8999094E+01 -2.8940362E+01
 -2.8881768E+01 -2.8823313E+01 -2.8764996E+01 -2.8706816E+01
 -2.8648774E+01 -2.8590868E+01 -2.8533099E+01 -2.8475466E+01
 -2.8417969E+01 -2.8360607E+01 -2.8303381E+01 -2.8246289E+01
 -2.8189331E+01 -2.8132507E+01 -2.8075817E+01 -2.8019260E+01
 -2.7962836E+01 -2.7906544E+01 -2.7850385E+01 -2.7794357E+01
 -2.7738461E+01 -2.7682696E+01 -2.7627062E+01 -2.7571558E+01
 -2.7516184E+01 -2.7460940E+01 -2.7405825E+01 -2.7350840E+01
 -2.7295983E+01 -2.7241254E+01 -2.7186653E+01 -2.7132180E+01
 -2.7077834E+01 -2.7023615E+01 -2.6969523E+01 -2.6915557E+01
 -2.6861717E+01 -2.6808002E+01 -2.6754413E+01 -2.6700949E+01
 -2.6647609E+01 -2.6594394E+01 -2.6541302E+01 -2.6488334E+01
 -2.6435490E+01 -2.6382768E+01 -2.6330169E+01 -2.6277693E+01
 -2.6225338E+01 -2.6173105E+01 -2.6120993E+01 -2.6069003E+01
 -2.6017133E+01 -2.5965383E+01 -2.5913753E+01 -2.5862244E+01
 -2.5810853E+01 -2.5759582E+01 -2.5708429E+01 -2.5657395E+01
 -2.5606479E+01 -2.5555681E+01 -2.5505001E+01 -2.5454437E+01
 -2.5403991E+01 -2.5353661E+01 -2.5303447E+01 -2.5253350E+01
 -2.5203368E+01 -2.5153502E+01 -2.5103750E+01 -2.5054113E+01
 -2.5004591E+01 -2.4955183E+01 -2.4905889E+01 -2.4856708E+01
 -2.4807641E+01 -2.4758687E+01 -2.4709845E+01 -2.4661116E+01
 -2.4612498E+01 -2.4563993E+01 -2.4515599E+01 -2.4467316E+01
 -2.4419144E+01 -2.4371083E+01 -2.4323132E+01 -2.4275291E+01
 -2.4227560E+01 -2.4179938E+01 -2.4132426E+01 -2.4085022E+01
 -2.4037727E+01 -2.3990540E+01 -2.3943461E+01 -2.3896490E+01
 -2.3849627E+01 -2.3802871E+01 -2.3756221E+01 -2.3709678E+01
 -2.3663242E+01 -2.3616912E+01 -2.3570687E+01 -2.3524568E+01
 -2.3478554E+01 -2.3432645E+01 -2.3386841E+01 -2.3341141E+01
 -2.3295546E+01 -2.3250054E+01 -2.3204666E+01 -2.3159381E+01
 -2.3114200E+01 -2.3069121E+01 -2.3024144E+01 -2.2979270E+01
 -2.2934498E+01 -2.2889828E+01 -2.2845259E+01 -2.2800791E+01
 -2.2756425E+01 -2.2712159E+01 -2.2667993E+01 -2.2623928E+01
 -2.2579962E+01 -2.2536096E+01 -2.2492330E+01 -2.2448663E+01
 -2.2405094E+01 -2.2361624E+01 -2.2318253E+01 -2.2274979E+01
 -2.2231804E+01 -2.2188726E+01 -2.2145745E+01 -2.2102862E+01
 -2.2060075E+01 -2.2017385E+01 -2.1974792E+01 -2.1932294E+01
 -2.1889892E+01 -2.1847586E+01 -2.1805375E+01 -2.1763260E+01
 -2.1721239E+01 -2.1679313E+01 -2.1637481E+01 -2.1595744E+01
 -2.1554100E+01 -2.1512550E+01 -2.1471093E+01 -2.1429730E+01
 -2.1388459E+01 -2.1347281E+01 -2.1306196E+01 -2.1265203E+01
 -2.1224302E+01 -2.1183492E+01 -2.1142774E+01 -2.1102148E+01
 -2.1061612E+01 -2.1021167E+01 -2.0980813E+01 -2.0940549E+01
 -2.0900376E+01 -2.0860292E+01 -2.0820298E+01 -2.0780393E+01
 -2.0740577E+01 -2.0700851E+01 -2.0661213E+01 -2.0621664E+01
 -2.0582203E+01 -2.0542830E+01 -2.0503545E+01 -2.0464347E+01
 -2.0425237E+01 -2.0386214E+01 -2.0347278E+01 -2.0308429E+01
 -2.0269667E+01 -2.0230990E+01 -2.0192400E+01 -2.0153895E+01
 -2.0115476E+01 -2.0077143E+01 -2.0038895E+01 -2.0000731E+01
 -1.9962653E+01 -1.9924659E+01 -1.9886749E+01 -1.9848924E+01
 -1.9811182E+01 -1.9773525E+01 -1.9735950E+01 -1.9698459E+01
 -1.9661051E+01 -1.9623726E+01 -1.9586483E+01 -1.9549323E+01
 -1.9512245E+01 -1.9475249E+01 -1.9438335E+01 -1.9401503E+01
 -1.9364752E+01 -1.9328082E+01 -1.9291493E+01 -1.9254985E+01
 -1.9218557E+01 -1.9182210E+01 -1.9145943E+01 -1.9109756E+01
 -1.9073649E+01 -1.9037621E+01 -1.9001673E+01 -1.8965804E+01
 -1.8930014E+01 -1.8894303E+01 -1.8858670E+01 -1.8823115E+01
 -1.8787639E+01 -1.8752241E+01 -1.8716920E+01 -1.8681677E+01
 -1.8646512E+01 -1.8611424E+01 -1.8576412E+01 -1.8541478E+01
 -1.8506620E+01 -1.8471839E+01 -1.8437133E+01 -1.8402504E+01
 -1.8367951E+01 -1.8333473E+01 -1.8299071E+01 -1.8264744E+01
 -1.8230493E+01 -1.8196316E+01 -1.8162214E+01 -1.8128186E+01
 -1.8094233E+01 -1.8060354E+01 -1.8026549E+01 -1.7992818E+01
 -1.7959160E+01 -1.7925576E+01 -1.7892065E+01 -1.7858627E+01
 -1.7825262E+01 -1.7791970E+01 -1.7758750E+01 -1.7725602E+01
 -1.7692527E+01 -1.7659524E+01 -1.7626592E+01 -1.7593732E+01
 -1.7560944E+01 -1.7528227E+01 -1.7495581E+01 -1.7463006E+01
 -1.7430501E+01 -1.7398067E+01 -1.7365704E+01 -1.7333411E+01
 -1.7301187E+01 -1.7269034E+01 -1.7236950E+01 -1.7204936E+01
 -1.7172991E+01 -1.7141116E+01 -1.7109309E+01 -1.7077571E+01
 -1.7045902E+01 -1.7014302E+01 -1.6982769E+01 -1.6951305E+01
 -1.6919909E+01 -1.6888581E+01 -1.6857320E+01 -1.6826127E+01
 -1.6795001E+01 -1.6763942E+01 -1.6732951E+01 -1.6702026E+01
 -1.6671167E+01 -1.6640376E+01 -1.6609650E+01 -1.6578991E+01
 -1.6548398E+01 -1.6517870E+01 -1.6487409E+01 -1.6457013E+01
 -1.6426682E+01 -1.6396416E+01 -1.6366215E+01 -1.6336080E+01
 -1.6306009E+01 -1.6276002E+01 -1.6246060E+01 -1.6216182E+01
 -1.6186369E+01 -1.6156619E+01 -1.6126933E+01 -1.6097310E+01
 -1.6067752E+01 -1.6038256E+01 -1.6008823E+01 -1.5979454E+01
 -1.5950147E+01 -1.5920903E+01 -1.5891722E+01 -1.5862603E+01
 -1.5833546E+01 -1.5804551E+01 -1.5775619E+01 -1.5746747E+01
 -1.5717938E+01 -1.5689190E+01 -1.5660504E+01 -1.5631878E+01
 -1.5603314E+01 -1.5574810E+01 -1.5546367E+01 -1.5517985E+01
 -1.5489663E+01 -1.5461402E+01 -1.5433200E+01 -1.5405059E+01
 -1.5376978E+01 -1.5348956E+01 -1.5320993E+01 -1.5293091E+01
 -1.5265247E+01 -1.5237463E+01 -1.5209737E+01 -1.5182070E+01
 -1.5154463E+01 -1.5126913E+01 -1.5099422E+01 -1.5071989E+01
 -1.5044615E+01 -1.5017298E+01 -1.4990040E+01 -1.4962839E+01
 -1.4935695E+01 -1.4908609E+01 -1.4881580E+01 -1.4854609E+01
 -1.4827694E+01 -1.4800836E+01 -1.4774035E+01 -1.4747291E+01
 -1.4720603E+01 -1.4693972E+01 -1.4667396E+01 -1.4640877E+01
 -1.4614414E+01 -1.4588006E+01 -1.4561654E+01 -1.4535358E+01
 -1.4509117E+01 -1.4482931E+01 -1.4456800E+01 -1.4430724E+01
 -1.4404704E+01 -1.4378737E+01 -1.4352826E+01 -1.4326969E+01
 -1.4301166E+01 -1.4275418E+01 -1.4249723E+01 -1.4224083E+01
 -1.4198496E+01 -1.4172963E+01 -1.4147483E+01 -1.4122057E+01
 -1.4096685E+01 -1.4071365E+01 -1.4046098E+01 -1.4020885E+01
 -1.3995724E+01 -1.3970616E+01 -1.3945560E+01 -1.3920557E+01
 -1.3895606E+01 -1.3870707E+01 -1.3845860E+01 -1.3821066E+01
 -1.3796322E+01 -1.3771631E+01 -1.3746991E+01 -1.3722403E+01
 -1.3697866E+01 -1.3673380E+01 -1.3648945E+01 -1.3624561E+01
 -1.3600228E+01 -1.3575945E+01 -1.3551713E+01 -1.3527532E+01
 -1.3503400E+01 -1.3479319E+01 -1.3455289E+01 -1.3431308E+01
 -1.3407377E+01 -1.3383495E+01 -1.3359664E+01 -1.3335881E+01
 -1.3312149E+01 -1.3288465E+01 -1.3264831E+01 -1.3241245E+01
 -1.3217709E+01 -1.3194221E+01 -1.3170782E+01 -1.3147391E+01
 -1.3124049E+01 -1.3100756E+01 -1.3077510E+01 -1.3054313E+01
 -1.3031164E+01 -1.3008062E+01 -1.2985008E+01 -1.2962002E+01
 -1.2939044E+01 -1.2916133E+01 -1.2893269E+01 -1.2870452E+01
 -1.2847683E+01 -1.2824960E+01 -1.2802285E+01 -1.2779656E+01
 -1.2757074E+01 -1.2734538E+01 -1.2712049E+01 -1.2689606E+01
 -1.2667209E+01 -1.2644859E+01 -1.2622554E+01 -1.2600295E+01
 -1.2578082E+01 -1.2555915E+01 -1.2533793E+01 -1.2511717E+01
 -1.2489686E+01 -1.2467700E+01 -1.2445760E+01 -1.2423864E+01
 -1.2402014E+01 -1.2380208E+01 -1.2358447E+01 -1.2336731E+01
 -1.2315059E+01 -1.2293431E+01 -1.2271848E+01 -1.2250309E+01
 -1.2228814E+01 -1.2207363E+01 -1.2185956E+01 -1.2164593E+01
 -1.2143273E+01 -1.2121998E+01 -1.2100765E+01 -1.2079576E+01
 -1.2058430E+01 -1.2037327E+01 -1.2016268E+01 -1.1995251E+01
 -1.1974277E+01 -1.1953346E+01 -1.1932458E+01 -1.1911612E+01
 -1.1890809E+01 -1.1870048E+01 -1.1849329E+01 -1.1828653E+01
 -1.1808019E+01 -1.1787426E+01 -1.1766876E+01 -1.1746367E+01
 -1.1725900E+01 -1.1705475E+01 -1.1685091E+01 -1.1664748E+01
 -1.1644447E+01 -1.1624187E+01 -1.1603968E+01 -1.1583790E+01
 -1.1563653E+01 -1.1543557E+01 -1.1523502E+01 -1.1503487E+01
 -1.1483513E+01 -1.1463579E+01 -1.1443685E+01 -1.1423832E+01
 -1.1404019E+01 -1.1384246E+01 -1.1364514E+01 -1.1344821E+01
 -1.1325167E+01 -1.1305554E+01 -1.1285980E+01 -1.1266446E+01
 -1.1246951E+01 -1.1227495E+01 -1.1208079E+01 -1.1188702E+01
 -1.1169363E+01 -1.1150064E+01 -1.1130804E+01 -1.1111583E+01
 -1.1092400E+01 -1.1073256E+01 -1.1054150E+01 -1.1035083E+01
 -1.1016055E+01 -1.0997064E+01 -1.0978112E+01 -1.0959198E+01
 -1.0940321E+01 -1.0921483E+01 -1.0902683E+01 -1.0883920E+01
 -1.0865195E+01 -1.0846508E+01 -1.0827858E+01 -1.0809245E+01
 -1.0790670E+01 -1.0772132E+01 -1.0753631E+01 -1.0735167E+01
 -1.0716740E+01 -1.0698350E+01 -1.0679997E+01 -1.0661681E+01
 -1.0643401E+01 -1.0625158E+01 -1.0606951E+01 -1.0588781E+01
 -1.0570647E+01 -1.0552549E+01 -1.0534487E+01 -1.0516462E+01
 -1.0498472E+01 -1.0480518E+01 -1.0462600E+01 -1.0444718E+01
 -1.0426871E+01 -1.0409060E+01 -1.0391285E+01 -1.0373545E+01
 -1.0355840E+01 -1.0338170E+01 -1.0320536E+01 -1.0302937E+01
 -1.0285372E+01 -1.0267843E+01 -1.0250348E+01 -1.0232888E+01
 -1.0215463E+01 -1.0198073E+01 -1.0180717E+01 -1.0163395E+01
 -1.0146108E+01 -1.0128855E+01 -1.0111637E+01 -1.0094452E+01
 -1.0077302E+01 -1.0060186E+01 -1.0043103E+01 -1.0026054E+01
 -1.0009039E+01 -9.9920581E+00 -9.9751104E+00 -9.9581963E+00
 -9.9413156E+00 -9.9244683E+00 -9.9076543E+00 -9.8908735E+00
 -9.8741259E+00 -9.8574114E+00 -9.8407298E+00 -9.8240812E+00
 -9.8074654E+00 -9.7908824E+00 -9.7743321E+00 -9.7578144E+00
 -9.7413293E+00 -9.7248767E+00 -9.7084565E+00 -9.6920686E+00
 -9.6757130E+00 -9.6593895E+00 -9.6430982E+00 -9.6268390E+00
 -9.6106117E+00 -9.5944163E+00 -9.5782528E+00 -9.5621210E+00
 -9.5460209E+00 -9.5299524E+00 -9.5139155E+00 -9.4979100E+00
 -9.4819359E+00 -9.4659932E+00 -9.4500818E+00 -9.4342015E+00
 -9.4183524E+00 -9.4025343E+00 -9.3867472E+00 -9.3709910E+00
 -9.3552657E+00 -9.3395711E+00 -9.3239073E+00 -9.3082740E+00
 -9.2926714E+00 -9.2770993E+00 -9.2615576E+00 -9.2460463E+00
 -9.2305652E+00 -9.2151144E+00 -9.1996938E+00 -9.1843033E+00
 -9.1689428E+00 -9.1536122E+00 -9.1383116E+00 -9.1230408E+00
 -9.1077997E+00 -9.0925884E+00 -9.0774066E+00 -9.0622545E+00
 -9.0471318E+00 -9.0320386E+00 -9.0169747E+00 -9.0019402E+00
 -8.9869349E+00 -8.9719587E+00 -8.9570117E+00 -8.9420937E+00
 -8.9272047E+00 -8.9123446E+00 -8.8975134E+00 -8.8827109E+00
 -8.8679372E+00 -8.8531921E+00 -8.8384756E+00 -8.8237877E+00
 -8.8091282E+00 -8.7944971E+00 -8.7798944E+00 -8.7653199E+00
 -8.7507737E+00 -8.7362556E+00 -8.7217656E+00 -8.7073037E+00
 -8.6928697E+00 -8.6784636E+00 -8.6640854E+00 -8.6497349E+00
 -8.6354122E+00 -8.6211171E+00 -8.6068497E+00 -8.5926097E+00
 -8.5783973E+00 -8.5642123E+00 -8.5500546E+00 -8.5359242E+00
 -8.5218211E+00 -8.5077451E+00 -8.4936963E+00 -8.4796745E+00
 -8.4656797E+00 -8.4517119E+00 -8.4377709E+00 -8.4238568E+00
 -8.4099694E+00 -8.3961087E+00 -8.3822747E+00 -8.3684672E+00
 -8.3546863E+00 -8.3409319E+00 -8.3272038E+00 -8.3135021E+00
 -8.2998267E+00 -8.2861776E+00 -8.2725546E+00 -8.2589577E+00
 -8.2453869E+00 -8.2318422E+00 -8.2183233E+00 -8.2048304E+00
 -8.1913633E+00 -8.1779220E+00 -8.1645064E+00 -8.1511165E+00
 -8.1377522E+00 -8.1244134E+00 -8.1111002E+00 -8.0978124E+00
 -8.0845499E+00 -8.0713129E+00 -8.0581011E+00 -8.0449145E+00
 -8.0317531E+00 -8.0186168E+00 -8.0055055E+00 -7.9924193E+00
 -7.9793580E+00 -7.9663216E+00 -7.9533101E+00 -7.9403233E+00
 -7.9273613E+00 -7.9144239E+00 -7.9015112E+00 -7.8886231E+00
 -7.8757594E+00 -7.8629203E+00 -7.8501055E+00 -7.8373151E+00
 -7.8245490E+00 -7.8118072E+00 -7.7990896E+00 -7.7863961E+00
 -7.7737267E+00 -7.7610814E+00 -7.7484600E+00 -7.7358626E+00
 -7.7232891E+00 -7.7107394E+00 -7.6982135E+00 -7.6857113E+00
 -7.6732328E+00 -7.6607780E+00 -7.6483467E+00 -7.6359389E+00
 -7.6235547E+00 -7.6111938E+00 -7.5988563E+00 -7.5865422E+00
 -7.5742513E+00 -7.5619837E+00 -7.5497392E+00 -7.5375179E+00
 -7.5253196E+00 -7.5131443E+00 -7.5009921E+00 -7.4888627E+00
 -7.4767562E+00 -7.4646726E+00 -7.4526117E+00 -7.4405736E+00
 -7.4285581E+00 -7.4165653E+00 -7.4045951E+00 -7.3926474E+00
 -7.3807221E+00 -7.3688193E+00 -7.3569389E+00 -7.3450809E+00
 -7.3332451E+00 -7.3214316E+00 -7.3096403E+00 -7.2978711E+00
 -7.2861240E+00 -7.2743990E+00 -7.2626960E+00 -7.2510149E+00
 -7.2393558E+00 -7.2277185E+00 -7.2161031E+00 -7.2045094E+00
 -7.1929374E+00 -7.1813871E+00 -7.1698585E+00 -7.1583514E+00
 -7.1468659E+00 -7.1354019E+00 -7.1239593E+00 -7.1125381E+00
 -7.1011383E+00 -7.0897598E+00 -7.0784026E+00 -7.0670666E+00
 -7.0557517E+00 -7.0444580E+00 -7.0331854E+00 -7.0219338E+00
 -7.0107032E+00 -6.9994935E+00 -6.9883048E+00 -6.9771369E+00
 -6.9659898E+00 -6.9548635E+00 -6.9437580E+00 -6.9326731E+00
 -6.9216088E+00 -6.9105652E+00 -6.8995421E+00 -6.8885395E+00
 -6.8775574E+00 -6.8665957E+00 -6.8556543E+00 -6.8447333E+00
 -6.8338326E+00 -6.8229522E+00 -6.8120919E+00 -6.8012518E+00
 -6.7904319E+00 -6.7796320E+00 -6.7688521E+00 -6.7580923E+00
 -6.7473524E+00 -6.7366324E+00 -6.7259322E+00 -6.7152519E+00
 -6.7045914E+00 -6.6939506E+00 -6.6833295E+00 -6.6727280E+00
 -6.6621462E+00 -6.6515839E+00 -6.6410412E+00 -6.6305180E+00
 -6.6200142E+00 -6.6095298E+00 -6.5990648E+00 -6.5886191E+00
 -6.5781927E+00 -6.5677855E+00 -6.5573976E+00 -6.5470288E+00
 -6.5366791E+00 -6.5263485E+00 -6.5160370E+00 -6.5057444E+00
 -6.4954709E+00 -6.4852162E+00 -6.4749804E+00 -6.4647635E+00
 -6.4545654E+00 -6.4443860E+00 -6.4342254E+00 -6.4240834E+00
 -6.4139601E+00 -6.4038554E+00 -6.3937693E+00 -6.3837017E+00
 -6.3736526E+00 -6.3636219E+00 -6.3536096E+00 -6.3436158E+00
 -6.3336402E+00 -6.3236830E+00 -6.3137440E+00 -6.3038232E+00
 -6.2939206E+00 -6.2840362E+00 -6.2741699E+00 -6.2643216E+00
 -6.2544913E+00 -6.2446791E+00 -6.2348848E+00 -6.2251084E+00
 -6.2153499E+00 -6.2056093E+00 -6.1958864E+00 -6.1861813E+00
 -6.1764940E+00 -6.1668243E+00 -6.1571723E+00 -6.1475380E+00
 -6.1379212E+00 -6.1283219E+00 -6.1187402E+00 -6.1091759E+00
 -6.0996291E+00 -6.0900997E+00 -6.0805876E+00 -6.0710929E+00
 -6.0616154E+00 -6.0521552E+00 -6.0427123E+00 -6.0332865E+00
 -6.0238779E+00 -6.0144863E+00 -6.0051119E+00 -5.9957545E+00
 -5.9864141E+00 -5.9770907E+00 -5.9677842E+00 -5.9584946E+00
 -5.9492219E+00 -5.9399660E+00 -5.9307269E+00 -5.9215046E+00
 -5.9122990E+00 -5.9031101E+00 -5.8939378E+00 -5.8847822E+00
 -5.8756432E+00 -5.8665207E+00 -5.8574147E+00 -5.8483252E+00
 -5.8392522E+00 -5.8301956E+00 -5.8211553E+00 -5.8121315E+00
 -5.8031239E+00 -5.7941326E+00 -5.7851576E+00 -5.7761988E+00
 -5.7672561E+00 -5.7583296E+00 -5.7494193E+00 -5.7405250E+00
 -5.7316467E+00 -5.7227845E+00 -5.7139383E+00 -5.7051080E+00
 -5.6962936E+00 -5.6874951E+00 -5.6787125E+00 -5.6699456E+00
 -5.6611946E+00 -5.6524593E+00 -5.6437397E+00 -5.6350359E+00
 -5.6263476E+00 -5.6176750E+00 -5.6090180E+00 -5.6003766E+00
 -5.5917507E+00 -5.5831403E+00 -5.5745453E+00 -5.5659658E+00
 -5.5574017E+00 -5.5488529E+00 -5.5403195E+00 -5.5318014E+00
 -5.5232986E+00 -5.5148110E+00 -5.5063386E+00 -5.4978814E+00
 -5.4894394E+00 -5.4810124E+00 -5.4726006E+00 -5.4642038E+00
 -5.4558221E+00 -5.4474553E+00 -5.4391035E+00 -5.4307667E+00
 -5.4224447E+00 -5.4141377E+00 -5.4058454E+00 -5.3975680E+00
 -5.3893054E+00 -5.3810575E+00 -5.3728243E+00 -5.3646059E+00
 -5.3564021E+00 -5.3482129E+00 -5.3400383E+00 -5.3318783E+00
 -5.3237329E+00 -5.3156019E+00 -5.3074855E+00 -5.2993835E+00
 -5.2912959E+00 -5.2832227E+00 -5.2751639E+00 -5.2671194E+00
 -5.2590893E+00 -5.2510734E+00 -5.2430718E+00 -5.2350843E+00
 -5.2271111E+00 -5.2191521E+00 -5.2112071E+00 -5.2032763E+00
 -5.1953596E+00 -5.1874569E+00 -5.1795682E+00 -5.1716936E+00
 -5.1638329E+00 -5.1559861E+00 -5.1481532E+00 -5.1403342E+00
 -5.1325291E+00 -5.1247378E+00 -5.1169603E+00 -5.1091965E+00
 -5.1014465E+00 -5.0937102E+00 -5.0859876E+00 -5.0782786E+00
 -5.0705833E+00 -5.0629016E+00 -5.0552334E+00 -5.0475788E+00
 -5.0399377E+00 -5.0323101E+00 -5.0246960E+00 -5.0170953E+00
 -5.0095080E+00 -5.0019341E+00 -4.9943735E+00 -4.9868263E+00
 -4.9792924E+00 -4.9717717E+00 -4.9642643E+00 -4.9567702E+00
 -4.9492892E+00 -4.9418214E+00 -4.9343667E+00 -4.9269252E+00
 -4.9194967E+00 -4.9120813E+00 -4.9046790E+00 -4.8972896E+00
 -4.8899133E+00 -4.8825499E+00 -4.8751994E+00 -4.8678618E+00
 -4.8605372E+00 -4.8532253E+00 -4.8459263E+00 -4.8386401E+00
 -4.8313667E+00 -4.8241061E+00 -4.8168581E+00 -4.8096229E+00
 -4.8024003E+00 -4.7951904E+00 -4.7879931E+00 -4.7808085E+00
 -4.7736364E+00 -4.7664768E+00 -4.7593298E+00 -4.7521952E+00
 -4.7450732E+00 -4.7379636E+00 -4.7308664E+00 -4.7237816E+00
 -4.7167092E+00 -4.7096491E+00 -4.7026014E+00 -4.6955659E+00
 -4.6885428E+00 -4.6815319E+00 -4.6745332E+00 -4.6675467E+00
 -4.6605724E+00 -4.6536103E+00 -4.6466603E+00 -4.6397224E+00
 -4.6327966E+00 -4.6258828E+00 -4.6189811E+00 -4.6120914E+00
 -4.6052136E+00 -4.5983479E+00 -4.5914941E+00 -4.5846521E+00
 -4.5778221E+00 -4.5710040E+00 -4.5641977E+00 -4.5574032E+00
 -4.5506205E+00 -4.5438496E+00 -4.5370904E+00 -4.5303430E+00
 -4.5236072E+00 -4.5168832E+00 -4.5101708E+00 -4.5034700E+00
 -4.4967809E+00 -4.4901033E+00 -4.4834373E+00 -4.4767829E+00
 -4.4701399E+00 -4.4635085E+00 -4.4568885E+00 -4.4502800E+00
 -4.4436830E+00 -4.4370973E+00 -4.4305230E+00 -4.4239601E+00
 -4.4174085E+00 -4.4108682E+00 -4.4043392E+00 -4.3978215E+00
 -4.3913151E+00 -4.3848199E+00 -4.3783358E+00 -4.3718630E+00
 -4.3654013E+00 -4.3589508E+00 -4.3525114E+00 -4.3460830E+00
 -4.3396658E+00 -4.3332596E+00 -4.3268644E+00 -4.3204803E+00
 -4.3141071E+00 -4.3077449E+00 -4.3013936E+00 -4.2950533E+00
 -4.2887238E+00 -4.2824053E+00 -4.2760976E+00 -4.2698007E+00
 -4.2635147E+00 -4.2572394E+00 -4.2509749E+00 -4.2447212E+00
 -4.2384782E+00 -4.2322459E+00 -4.2260243E+00 -4.2198134E+00
 -4.2136131E+00 -4.2074234E+00 -4.2012444E+00 -4.1950759E+00
 -4.1889180E+00 -4.1827706E+00 -4.1766338E+00 -4.1705074E+00
 -4.1643916E+00 -4.1582862E+00 -4.1521912E+00 -4.1461067E+00
 -4.1400325E+00 -4.1339688E+00 -4.1279154E+00 -4.1218723E+00
 -4.1158396E+00 -4.1098171E+00 -4.1038050E+00 -4.0978031E+00
 -4.0918114E+00 -4.0858299E+00 -4.0798587E+00 -4.0738976E+00
 -4.0679467E+00 -4.0620059E+00 -4.0560753E+00 -4.0501547E+00
 -4.0442442E+00 -4.0383438E+00 -4.0324534E+00 -4.0265731E+00
 -4.0207027E+00 -4.0148424E+00 -4.0089920E+00 -4.0031515E+00
 -3.9973210E+00 -3.9915003E+00 -3.9856896E+00 -3.9798887E+00
 -3.9740977E+00 -3.9683164E+00 -3.9625451E+00 -3.9567834E+00
 -3.9510316E+00 -3.9452895E+00 -3.9395572E+00 -3.9338345E+00
 -3.9281216E+00 -3.9224183E+00 -3.9167247E+00 -3.9110408E+00
 -3.9053664E+00 -3.8997017E+00 -3.8940465E+00 -3.8884010E+00
 -3.8827649E+00 -3.8771384E+00 -3.8715214E+00 -3.8659139E+00
 -3.8603158E+00 -3.8547273E+00 -3.8491481E+00 -3.8435784E+00
 -3.8380180E+00 -3.8324671E+00 -3.8269255E+00 -3.8213933E+00
 -3.8158704E+00 -3.8103568E+00 -3.8048525E+00 -3.7993574E+00
 -3.7938717E+00 -3.7883951E+00 -3.7829278E+00 -3.7774697E+00
 -3.7720208E+00 -3.7665810E+00 -3.7611504E+00 -3.7557289E+00
 -3.7503166E+00 -3.7449133E+00 -3.7395191E+00 -3.7341340E+00
 -3.7287579E+00 -3.7233909E+00 -3.7180328E+00 -3.7126838E+00
 -3.7073437E+00 -3.7020126E+00 -3.6966904E+00 -3.6913772E+00
 -3.6860728E+00 -3.6807774E+00 -3.6754908E+00 -3.6702131E+00
 -3.6649442E+00 -3.6596842E+00 -3.6544329E+00 -3.6491905E+00
 -3.6439568E+00 -3.6387318E+00 -3.6335156E+00 -3.6283082E+00
 -3.6231094E+00 -3.6179193E+00 -3.6127379E+00 -3.6075652E+00
 -3.6024010E+00 -3.5972455E+00 -3.5920987E+00 -3.5869604E+00
 -3.5818306E+00 -3.5767095E+00 -3.5715968E+00 -3.5664927E+00
 -3.5613971E+00 -3.5563100E+00 -3.5512314E+00 -3.5461612E+00
 -3.5410995E+00 -3.5360462E+00 -3.5310013E+00 -3.5259648E+00
 -3.5209367E+00 -3.5159170E+00 -3.5109056E+00 -3.5059025E+00
 -3.5009078E+00 -3.4959213E+00 -3.4909431E+00 -3.4859732E+00
 -3.4810116E+00 -3.4760582E+00 -3.4711130E+00 -3.4661760E+00
 -3.4612472E+00 -3.4563266E+00 -3.4514141E+00 -3.4465098E+00
 -3.4416136E+00 -3.4367255E+00 -3.4318455E+00 -3.4269736E+00
 -3.4221098E+00 -3.4172540E+00 -3.4124063E+00 -3.4075666E+00
 -3.4027349E+00 -3.3979111E+00 -3.3930954E+00 -3.3882876E+00
 -3.3834878E+00 -3.3786959E+00 -3.3739119E+00 -3.3691358E+00
 -3.3643676E+00 -3.3596072E+00 -3.3548548E+00 -3.3501101E+00
 -3.3453733E+00 -3.3406443E+00 -3.3359231E+00 -3.3312097E+00
 -3.3265040E+00 -3.3218061E+00 -3.3171160E+00 -3.3124335E+00
 -3.3077588E+00 -3.3030918E+00 -3.2984324E+00 -3.2937807E+00
 -3.2891367E+00 -3.2845003E+00 -3.2798715E+00 -3.2752504E+00
 -3.2706368E+00 -3.2660308E+00 -3.2614324E+00 -3.2568415E+00
 -3.2522582E+00 -3.2476824E+00 -3.2431141E+00 -3.2385533E+00
 -3.2339999E+00 -3.2294541E+00 -3.2249157E+00 -3.2203847E+00
 -3.2158612E+00 -3.2113450E+00 -3.2068363E+00 -3.2023350E+00
 -3.1978410E+00 -3.1933544E+00 -3.1888751E+00 -3.1844031E+00
 -3.1799385E+00 -3.1754812E+00 -3.1710311E+00 -3.1665883E+00
 -3.1621528E+00 -3.1577246E+00 -3.1533035E+00 -3.1488897E+00
 -3.1444831E+00 -3.1400837E+00 -3.1356914E+00 -3.1313064E+00
 -3.1269285E+00 -3.1225577E+00 -3.1181940E+00 -3.1138375E+00
 -3.1094880E+00 -3.1051457E+00 -3.1008104E+00 -3.0964822E+00
 -3.0921610E+00 -3.0878469E+00 -3.0835397E+00 -3.0792396E+00
 -3.0749465E+00 -3.0706604E+00 -3.0663812E+00 -3.0621090E+00
 -3.0578437E+00 -3.0535854E+00 -3.0493340E+00 -3.0450894E+00
 -3.0408518E+00 -3.0366211E+00 -3.0323972E+00 -3.0281802E+00
 -3.0239700E+00 -3.0197666E+00 -3.0155701E+00 -3.0113803E+00
 -3.0071973E+00 -3.0030212E+00 -2.9988518E+00 -2.9946891E+00
 -2.9905332E+00 -2.9863840E+00 -2.9822415E+00 -2.9781057E+00
 -2.9739766E+00 -2.9698542E+00 -2.9657385E+00 -2.9616294E+00
 -2.9575269E+00 -2.9534311E+00 -2.9493419E+00 -2.9452593E+00
 -2.9411833E+00 -2.9371138E+00 -2.9330510E+00 -2.9289947E+00
 -2.9249449E+00 -2.9209017E+00 -2.9168649E+00 -2.9128347E+00
 -2.9088110E+00 -2.9047938E+00 -2.9007830E+00 -2.8967787E+00
 -2.8927809E+00 -2.8887895E+00 -2.8848045E+00 -2.8808259E+00
 -2.8768537E+00 -2.8728879E+00 -2.8689285E+00 -2.8649754E+00
 -2.8610287E+00 -2.8570884E+00 -2.8531543E+00 -2.8492266E+00
 -2.8453052E+00 -2.8413901E+00 -2.8374813E+00 -2.8335787E+00
 -2.8296825E+00 -2.8257924E+00 -2.8219086E+00 -2.8180310E+00
 -2.8141597E+00 -2.8102945E+00 -2.8064355E+00 -2.8025827E+00
 -2.7987361E+00 -2.7948957E+00 -2.7910613E+00 -2.7872332E+00
 -2.7834111E+00 -2.7795952E+00 -2.7757853E+00 -2.7719816E+00
 -2.7681839E+00 -2.7643923E+00 -2.7606068E+00 -2.7568273E+00
 -2.7530538E+00 -2.7492864E+00 -2.7455250E+00 -2.7417695E+00
 -2.7380201E+00 -2.7342767E+00 -2.7305392E+00 -2.7268077E+00
 -2.7230821E+00 -2.7193625E+00 -2.7156488E+00 -2.7119410E+00
 -2.7082391E+00 -2.7045431E+00 -2.7008530E+00 -2.6971687E+00
 -2.6934904E+00 -2.6898179E+00 -2.6861512E+00 -2.6824903E+00
 -2.6788353E+00 -2.6751861E+00 -2.6715426E+00 -2.6679050E+00
 -2.6642731E+00 -2.6606470E+00 -2.6570267E+00 -2.6534121E+00
 -2.6498033E+00 -2.6462001E+00 -2.6426027E+00 -2.6390110E+00
 -2.6354250E+00 -2.6318446E+00 -2.6282700E+00 -2.6247010E+00
 -2.6211376E+00 -2.6175799E+00 -2.6140279E+00 -2.6104814E+00
 -2.6069406E+00 -2.6034053E+00 -2.5998757E+00 -2.5963516E+00
 -2.5928332E+00 -2.5893202E+00 -2.5858129E+00 -2.5823110E+00
 -2.5788147E+00 -2.5753239E+00 -2.5718387E+00 -2.5683589E+00
 -2.5648846E+00 -2.5614158E+00 -2.5579525E+00 -2.5544946E+00
 -2.5510422E+00 -2.5475953E+00 -2.5441537E+00 -2.5407176E+00
 -2.5372869E+00 -2.5338616E+00 -2.5304417E+00 -2.5270272E+00
 -2.5236181E+00 -2.5202143E+00 -2.5168159E+00 -2.5134228E+00
 -2.5100351E+00 -2.5066526E+00 -2.5032755E+00 -2.4999037E+00
 -2.4965373E+00 -2.4931760E+00 -2.4898201E+00 -2.4864695E+00
 -2.4831241E+00 -2.4797839E+00 -2.4764490E+00 -2.4731193E+00
 -2.4697949E+00 -2.4664756E+00 -2.4631616E+00 -2.4598527E+00
 -2.4565491E+00 -2.4532506E+00 -2.4499573E+00 -2.4466691E+00
 -2.4433861E+00 -2.4401082E+00 -2.4368354E+00 -2.4335678E+00
 -2.4303053E+00 -2.4270479E+00 -2.4237956E+00 -2.4205483E+00
 -2.4173061E+00 -2.4140690E+00 -2.4108370E+00 -2.4076100E+00
 -2.4043880E+00 -2.4011711E+00 -2.3979592E+00 -2.3947523E+00
 -2.3915504E+00 -2.3883535E+00 -2.3851616E+00 -2.3819746E+00
 -2.3787927E+00 -2.3756156E+00 -2.3724436E+00 -2.3692764E+00
 -2.3661142E+00 -2.3629570E+00 -2.3598046E+00 -2.3566572E+00
 -2.3535146E+00 -2.3503769E+00 -2.3472441E+00 -2.3441162E+00
 -2.3409932E+00 -2.3378750E+00 -2.3347616E+00 -2.3316531E+00
 -2.3285494E+00 -2.3254505E+00 -2.3223564E+00 -2.3192672E+00
 -2.3161827E+00 -2.3131030E+00 -2.3100281E+00 -2.3069579E+00
 -2.3038926E+00 -2.3008319E+00 -2.2977760E+00 -2.2947249E+00
 -2.2916784E+00 -2.2886367E+00 -2.2855997E+00 -2.2825674E+00
 -2.2795398E+00 -2.2765169E+00 -2.2734986E+00 -2.2704850E+00
 -2.2674761E+00 -2.2644718E+00 -2.2614722E+00 -2.2584772E+00
 -2.2554868E+00 -2.2525011E+00 -2.2495199E+00 -2.2465434E+00
 -2.2435715E+00 -2.2406041E+00 -2.2376413E+00 -2.2346831E+00
 -2.2317295E+00 -2.2287804E+00 -2.2258358E+00 -2.2228958E+00
 -2.2199603E+00 -2.2170293E+00 -2.2141029E+00 -2.2111810E+00
 -2.2082635E+00 -2.2053506E+00 -2.2024421E+00 -2.1995381E+00
 -2.1966385E+00 -2.1937435E+00 -2.1908528E+00 -2.1879667E+00
 -2.1850849E+00 -2.1822076E+00 -2.1793347E+00 -2.1764662E+00
 -2.1736021E+00 -2.1707424E+00 -2.1678871E+00 -2.1650362E+00
 -2.1621897E+00 -2.1593475E+00 -2.1565097E+00 -2.1536762E+00
 -2.1508471E+00 -2.1480223E+00 -2.1452018E+00 -2.1423856E+00
 -2.1395738E+00 -2.1367663E+00 -2.1339630E+00 -2.1311641E+00
 -2.1283694E+00 -2.1255790E+00 -2.1227929E+00 -2.1200111E+00
 -2.1172335E+00 -2.1144601E+00 -2.1116910E+00 -2.1089261E+00
 -2.1061654E+00 -2.1034089E+00 -2.1006567E+00 -2.0979086E+00
 -2.0951648E+00 -2.0924251E+00 -2.0896896E+00 -2.0869583E+00
 -2.0842311E+00 -2.0815081E+00 -2.0787893E+00 -2.0760746E+00
 -2.0733640E+00 -2.0706575E+00 -2.0679552E+00 -2.0652570E+00
 -2.0625629E+00 -2.0598729E+00 -2.0571870E+00 -2.0545051E+00
 -2.0518274E+00 -2.0491537E+00 -2.0464841E+00 -2.0438185E+00
 -2.0411570E+00 -2.0384996E+00 -2.0358461E+00 -2.0331967E+00
 -2.0305513E+00 -2.0279100E+00 -2.0252726E+00 -2.0226392E+00
 -2.0200099E+00 -2.0173845E+00 -2.0147631E+00 -2.0121457E+00
 -2.0095322E+00 -2.0069227E+00 -2.0043172E+00 -2.0017156E+00
 -1.9991179E+00 -1.9965242E+00 -1.9939344E+00 -1.9913485E+00
 -1.9887665E+00 -1.9861884E+00 -1.9836143E+00 -1.9810440E+00
 -1.9784776E+00 -1.9759151E+00 -1.9733564E+00 -1.9708017E+00
 -1.9682507E+00 -1.9657037E+00 -1.9631604E+00 -1.9606210E+00
 -1.9580855E+00 -1.9555537E+00 -1.9530258E+00 -1.9505017E+00
 -1.9479814E+00 -1.9454649E+00 -1.9429522E+00 -1.9404433E+00
 -1.9379381E+00 -1.9354368E+00 -1.9329392E+00 -1.9304453E+00
 -1.9279552E+00 -1.9254689E+00 -1.9229863E+00 -1.9205074E+00
 -1.9180323E+00 -1.9155608E+00 -1.9130931E+00 -1.9106291E+00
 -1.9081688E+00 -1.9057122E+00 -1.9032593E+00 -1.9008101E+00
 -1.8983645E+00 -1.8959226E+00 -1.8934844E+00 -1.8910498E+00
 -1.8886189E+00 -1.8861916E+00 -1.8837680E+00 -1.8813480E+00
 -1.8789316E+00 -1.8765189E+00 -1.8741097E+00 -1.8717042E+00
 -1.8693023E+00 -1.8669039E+00 -1.8645092E+00 -1.8621180E+00
 -1.8597305E+00 -1.8573464E+00 -1.8549660E+00 -1.8525891E+00
 -1.8502158E+00 -1.8478460E+00 -1.8454797E+00 -1.8431170E+00
 -1.8407578E+00 -1.8384021E+00 -1.8360500E+00 -1.8337013E+00
 -1.8313562E+00 -1.8290146E+00 -1.8266764E+00 -1.8243418E+00
 -1.8220106E+00 -1.8196829E+00 -1.8173586E+00 -1.8150379E+00
 -1.8127206E+00 -1.8104067E+00 -1.8080963E+00 -1.8057893E+00
 -1.8034857E+00 -1.8011856E+00 -1.7988889E+00 -1.7965956E+00
 -1.7943058E+00 -1.7920193E+00 -1.7897362E+00 -1.7874566E+00
 -1.7851803E+00 -1.7829074E+00 -1.7806378E+00 -1.7783717E+00
 -1.7761089E+00 -1.7738494E+00 -1.7715933E+00 -1.7693406E+00
 -1.7670912E+00 -1.7648451E+00 -1.7626024E+00 -1.7603630E+00
 -1.7581269E+00 -1.7558941E+00 -1.7536647E+00 -1.7514385E+00
 -1.7492156E+00 -1.7469960E+00 -1.7447797E+00 -1.7425667E+00
 -1.7403570E+00 -1.7381505E+00 -1.7359473E+00 -1.7337473E+00
 -1.7315506E+00 -1.7293572E+00 -1.7271670E+00 -1.7249800E+00
 -1.7227962E+00 -1.7206157E+00 -1.7184384E+00 -1.7162643E+00
 -1.7140934E+00 -1.7119257E+00 -1.7097613E+00 -1.7076000E+00
 -1.7054419E+00 -1.7032869E+00 -1.7011352E+00 -1.6989866E+00
 -1.6968412E+00 -1.6946990E+00 -1.6925599E+00 -1.6904239E+00
 -1.6882911E+00 -1.6861615E+00 -1.6840349E+00 -1.6819115E+00
 -1.6797912E+00 -1.6776741E+00 -1.6755600E+00 -1.6734491E+00
 -1.6713413E+00 -1.6692365E+00 -1.6671349E+00 -1.6650363E+00
 -1.6629408E+00 -1.6608484E+00 -1.6587591E+00 -1.6566728E+00
 -1.6545896E+00 -1.6525094E+00 -1.6504323E+00 -1.6483583E+00
 -1.6462873E+00 -1.6442193E+00 -1.6421543E+00 -1.6400924E+00
 -1.6380335E+00 -1.6359776E+00 -1.6339247E+00 -1.6318748E+00
 -1.6298279E+00 -1.6277841E+00 -1.6257432E+00 -1.6237053E+00
 -1.6216703E+00 -1.6196384E+00 -1.6176094E+00 -1.6155834E+00
 -1.6135603E+00 -1.6115402E+00 -1.6095230E+00 -1.6075088E+00
 -1.6054976E+00 -1.6034892E+00 -1.6014838E+00 -1.5994813E+00
 -1.5974818E+00 -1.5954851E+00 -1.5934914E+00 -1.5915006E+00
 -1.5895126E+00 -1.5875276E+00 -1.5855455E+00 -1.5835662E+00
 -1.5815899E+00 -1.5796164E+00 -1.5776457E+00 -1.5756780E+00
 -1.5737131E+00 -1.5717511E+00 -1.5697919E+00 -1.5678356E+00
 -1.5658821E+00 -1.5639314E+00 -1.5619836E+00 -1.5600386E+00
 -1.5580965E+00 -1.5561571E+00 -1.5542206E+00 -1.5522869E+00
 -1.5503560E+00 -1.5484279E+00 -1.5465026E+00 -1.5445801E+00
 -1.5426603E+00 -1.5407434E+00 -1.5388292E+00 -1.5369178E+00
 -1.5350092E+00 -1.5331034E+00 -1.5312003E+00 -1.5292999E+00
 -1.5274023E+00 -1.5255075E+00 -1.5236154E+00 -1.5217260E+00
 -1.5198394E+00 -1.5179555E+00 -1.5160743E+00 -1.5141959E+00
 -1.5123201E+00 -1.5104471E+00 -1.5085767E+00 -1.5067091E+00
 -1.5048442E+00 -1.5029819E+00 -1.5011224E+00 -1.4992655E+00
 -1.4974113E+00 -1.4955598E+00 -1.4937110E+00 -1.4918648E+00
 -1.4900213E+00 -1.4881804E+00 -1.4863422E+00 -1.4845067E+00
 -1.4826738E+00 -1.4808435E+00 -1.4790158E+00 -1.4771908E+00
 -1.4753685E+00 -1.4735487E+00 -1.4717316E+00 -1.4699170E+00
 -1.4681051E+00 -1.4662958E+00 -1.4644891E+00 -1.4626850E+00
 -1.4608835E+00 -1.4590845E+00 -1.4572882E+00 -1.4554944E+00
 -1.4537032E+00 -1.4519146E+00 -1.4501285E+00 -1.4483451E+00
 -1.4465641E+00 -1.4447857E+00 -1.4430099E+00 -1.4412366E+00
 -1.4394659E+00 -1.4376977E+00 -1.4359320E+00 -1.4341689E+00
 -1.4324082E+00 -1.4306502E+00 -1.4288946E+00 -1.4271415E+00
 -1.4253910E+00 -1.4236429E+00 -1.4218973E+00 -1.4201543E+00
 -1.4184137E+00 -1.4166757E+00 -1.4149401E+00 -1.4132070E+00
 -1.4114763E+00 -1.4097482E+00 -1.4080225E+00 -1.4062992E+00
 -1.4045785E+00 -1.4028602E+00 -1.4011443E+00 -1.3994309E+00
 -1.3977199E+00 -1.3960114E+00 -1.3943053E+00 -1.3926016E+00
 -1.3909004E+00 -1.3892016E+00 -1.3875052E+00 -1.3858112E+00
 -1.3841197E+00 -1.3824305E+00 -1.3807438E+00 -1.3790594E+00
 -1.3773775E+00 -1.3756979E+00 -1.3740207E+00 -1.3723460E+00
 -1.3706735E+00 -1.3690035E+00 -1.3673359E+00 -1.3656706E+00
 -1.3640077E+00 -1.3623471E+00 -1.3606889E+00 -1.3590331E+00
 -1.3573796E+00 -1.3557284E+00 -1.3540796E+00 -1.3524332E+00
 -1.3507890E+00 -1.3491472E+00 -1.3475078E+00 -1.3458706E+00
 -1.3442358E+00 -1.3426033E+00 -1.3409731E+00 -1.3393452E+00
 -1.3377196E+00 -1.3360963E+00 -1.3344754E+00 -1.3328567E+00
 -1.3312403E+00 -1.3296262E+00 -1.3280143E+00 -1.3264048E+00
 -1.3247975E+00 -1.3231925E+00 -1.3215898E+00 -1.3199893E+00
 -1.3183911E+00 -1.3167951E+00 -1.3152014E+00 -1.3136100E+00
 -1.3120208E+00 -1.3104338E+00 -1.3088491E+00 -1.3072666E+00
 -1.3056863E+00 -1.3041083E+00 -1.3025325E+00 -1.3009589E+00
 -1.2993876E+00 -1.2978184E+00 -1.2962515E+00 -1.2946867E+00
 -1.2931242E+00 -1.2915639E+00 -1.2900057E+00 -1.2884498E+00
 -1.2868960E+00 -1.2853445E+00 -1.2837951E+00 -1.2822479E+00
 -1.2807029E+00 -1.2791600E+00 -1.2776193E+00 -1.2760808E+00
 -1.2745444E+00 -1.2730102E+00 -1.2714781E+00 -1.2699482E+00
 -1.2684205E+00 -1.2668949E+00 -1.2653714E+00 -1.2638501E+00
 -1.2623309E+00 -1.2608138E+00 -1.2592988E+00 -1.2577860E+00
 -1.2562753E+00 -1.2547667E+00 -1.2532603E+00 -1.2517559E+00
 -1.2502536E+00 -1.2487535E+00 -1.2472554E+00 -1.2457595E+00
  4.3897054E+04  8.7389963E+04  1.3048152E+05  1.7317450E+05
  2.1547165E+05  2.5737572E+05  2.9888943E+05  3.4001548E+05
  3.8075657E+05  4.2111536E+05  4.6109452E+05  5.0069667E+05
  5.3992446E+05  5.7878048E+05  6.1726733E+05  6.5538758E+05
  6.9314378E+05  7.3053850E+05  7.6757424E+05  8.0425353E+05
  8.4057887E+05  8.7655272E+05  9.1217757E+05  9.4745585E+05
  9.8239002E+05  1.0169825E+06  1.0512356E+06  1.0851519E+06
  1.1187336E+06  1.1519832E+06  1.1849029E+06  1.2174952E+06
  1.2497622E+06  1.2817064E+06  1.3133300E+06  1.3446353E+06
  1.3756246E+06  1.4063001E+06  1.4366640E+06  1.4667185E+06
  1.4964659E+06  1.5259084E+06  1.5550480E+06  1.5838871E+06
  1.6124277E+06  1.6406720E+06  1.6686220E+06  1.6962800E+06
  1.7236480E+06  1.7507280E+06  1.7775223E+06  1.8040327E+06
  1.8302614E+06  1.8562104E+06  1.8818817E+06  1.9072773E+06
  1.9323993E+06  1.9572495E+06  1.9818300E+06  2.0061428E+06
  2.0301896E+06  2.0539726E+06  2.0774936E+06  2.1007546E+06
  2.1237573E+06  2.1465038E+06  2.1689958E+06  2.1912353E+06
  2.2132241E+06  2.2349640E+06  2.2564568E+06  2.2777044E+06
  2.2987086E+06  2.3194711E+06  2.3399938E+06  2.3602783E+06
  2.3803265E+06  2.4001402E+06  2.4197210E+06  2.4390706E+06
  2.4581908E+06  2.4770833E+06  2.4957498E+06  2.5141920E+06
  2.5324114E+06  2.5504098E+06  2.5681889E+06  2.5857503E+06
  2.6030955E+06  2.6202263E+06  2.6371441E+06  2.6538507E+06
  2.6703476E+06  2.6866364E+06  2.7027187E+06  2.7185959E+06
  2.7342697E+06  2.7497416E+06  2.7650131E+06  2.7800857E+06
  2.7949610E+06  2.8096404E+06  2.8241254E+06  2.8384176E+06
  2.8525183E+06  2.8664290E+06  2.8801512E+06  2.8936864E+06
  2.9070359E+06  2.9202012E+06  2.9331837E+06  2.9459847E+06
  2.9586058E+06  2.9710482E+06  2.9833134E+06  2.9954027E+06
  3.0073175E+06  3.0190591E+06  3.0306289E+06  3.0420282E+06
  3.0532583E+06  3.0643206E+06  3.0752163E+06  3.0859468E+06
  3.0965133E+06  3.1069172E+06  3.1171596E+06  3.1272419E+06
  3.1371653E+06  3.1469311E+06  3.1565406E+06  3.1659948E+06
  3.1752951E+06  3.1844428E+06  3.1934389E+06  3.2022847E+06
  3.2109814E+06  3.2195301E+06  3.2279322E+06  3.2361886E+06
  3.2443006E+06  3.2522694E+06  3.2600961E+06  3.2677817E+06
  3.2753276E+06  3.2827347E+06  3.2900042E+06  3.2971372E+06
  3.3041349E+06  3.3109982E+06  3.3177284E+06  3.3243264E+06
  3.3307934E+06  3.3371303E+06  3.3433384E+06  3.3494186E+06
  3.3553720E+06  3.3611996E+06  3.3669024E+06  3.3724815E+06
  3.3779379E+06  3.3832725E+06  3.3884865E+06  3.3935808E+06
  3.3985564E+06  3.4034143E+06  3.4081554E+06  3.4127808E+06
  3.4172913E+06  3.4216880E+06  3.4259719E+06  3.4301437E+06
  3.4342046E+06  3.4381554E+06  3.4419970E+06  3.4457304E+06
  3.4493565E+06  3.4528762E+06  3.4562905E+06  3.4596001E+06
  3.4628060E+06  3.4659090E+06  3.4689102E+06  3.4718102E+06
  3.4746100E+06  3.4773105E+06  3.4799125E+06  3.4824169E+06
  3.4848245E+06  3.4871361E+06  3.4893525E+06  3.4914747E+06
  3.4935034E+06  3.4954394E+06  3.4972836E+06  3.4990367E+06
  3.5006996E+06  3.5022731E+06  3.5037578E+06  3.5051547E+06
  3.5064644E+06  3.5076879E+06  3.5088257E+06  3.5098788E+06
  3.5108478E+06  3.5117335E+06  3.5125367E+06  3.5132580E+06
  3.5138983E+06  3.5144582E+06  3.5149386E+06  3.5153400E+06
  3.5156632E+06  3.5159090E+06  3.5160780E+06  3.5161710E+06
  3.5161886E+06  3.5161315E+06  3.5160004E+06  3.5157961E+06
  3.5155191E+06  3.5151701E+06  3.5147499E+06  3.5142591E+06
  3.5136982E+06  3.5130681E+06  3.5123694E+06  3.5116026E+06
  3.5107684E+06  3.5098676E+06  3.5089006E+06  3.5078681E+06
  3.5067708E+06  3.5056093E+06  3.5043841E+06  3.5030960E+06
  3.5017454E+06  3.5003331E+06  3.4988595E+06  3.4973254E+06
  3.4957312E+06  3.4940776E+06  3.4923651E+06  3.4905944E+06
  3.4887659E+06  3.4868803E+06  3.4849382E+06  3.4829400E+06
  3.4808864E+06  3.4787779E+06  3.4766151E+06  3.4743984E+06
  3.4721285E+06  3.4698058E+06  3.4674310E+06  3.4650045E+06
  3.4625268E+06  3.4599986E+06  3.4574202E+06  3.4547923E+06
  3.4521153E+06  3.4493897E+06  3.4466161E+06  3.4437949E+06
  3.4409267E+06  3.4380119E+06  3.4350510E+06  3.4320445E+06
  3.4289929E+06  3.4258967E+06  3.4227563E+06  3.4195722E+06
  3.4163449E+06  3.4130749E+06  3.4097626E+06  3.4064084E+06
  3.4030129E+06  3.3995765E+06  3.3960995E+06  3.3925826E+06
  3.3890261E+06  3.3854304E+06  3.3817960E+06  3.3781233E+06
  3.3744128E+06  3.3706648E+06  3.3668799E+06  3.3630584E+06
  3.3592007E+06  3.3553073E+06  3.3513785E+06  3.3474148E+06
  3.3434166E+06  3.3393842E+06  3.3353181E+06  3.3312187E+06
  3.3270864E+06  3.3229215E+06  3.3187245E+06  3.3144956E+06
  3.3102354E+06  3.3059442E+06  3.3016224E+06  3.2972702E+06
  3.2928882E+06  3.2884767E+06  3.2840360E+06  3.2795665E+06
  3.2750685E+06  3.2705425E+06  3.2659887E+06  3.2614076E+06
  3.2567994E+06  3.2521645E+06  3.2475033E+06  3.2428161E+06
  3.2381032E+06  3.2333650E+06  3.2286019E+06  3.2238140E+06
  3.2190018E+06  3.2141656E+06  3.2093057E+06  3.2044225E+06
  3.1995162E+06  3.1945871E+06  3.1896357E+06  3.1846621E+06
  3.1796668E+06  3.1746499E+06  3.1696119E+06  3.1645529E+06
  3.1594734E+06  3.1543736E+06  3.1492538E+06  3.1441142E+06
  3.1389553E+06  3.1337772E+06  3.1285803E+06  3.1233648E+06
  3.1181311E+06  3.1128793E+06  3.1076099E+06  3.1023229E+06
  3.0970188E+06  3.0916978E+06  3.0863602E+06  3.0810062E+06
  3.0756360E+06  3.0702500E+06  3.0648485E+06  3.0594316E+06
  3.0539996E+06  3.0485528E+06  3.0430915E+06  3.0376158E+06
  3.0321260E+06  3.0266224E+06  3.0211053E+06  3.0155748E+06
  3.0100312E+06  3.0044747E+06  2.9989056E+06  2.9933241E+06
  2.9877305E+06  2.9821249E+06  2.9765076E+06  2.9708788E+06
  2.9652388E+06  2.9595878E+06  2.9539259E+06  2.9482535E+06
  2.9425707E+06  2.9368777E+06  2.9311748E+06  2.9254622E+06
  2.9197400E+06  2.9140086E+06  2.9082680E+06  2.9025185E+06
  2.8967604E+06  2.8909937E+06  2.8852188E+06  2.8794357E+06
  2.8736448E+06  2.8678461E+06  2.8620400E+06  2.8562265E+06
  2.8504059E+06  2.8445784E+06  2.8387441E+06  2.8329033E+06
  2.8270561E+06  2.8212027E+06  2.8153432E+06  2.8094780E+06
  2.8036070E+06  2.7977306E+06  2.7918489E+06  2.7859620E+06
  2.7800702E+06  2.7741736E+06  2.7682724E+06  2.7623667E+06
  2.7564567E+06  2.7505426E+06  2.7446246E+06  2.7387027E+06
  2.7327772E+06  2.7268482E+06  2.7209159E+06  2.7149804E+06
  2.7090419E+06  2.7031006E+06  2.6971565E+06  2.6912099E+06
  2.6852609E+06  2.6793096E+06  2.6733563E+06  2.6674009E+06
  2.6614437E+06  2.6554849E+06  2.6495245E+06  2.6435627E+06
  2.6375997E+06  2.6316356E+06  2.6256704E+06  2.6197044E+06
  2.6137377E+06  2.6077705E+06  2.6018027E+06  2.5958347E+06
  2.5898665E+06  2.5838982E+06  2.5779300E+06  2.5719619E+06
  2.5659942E+06  2.5600269E+06  2.5540602E+06  2.5480942E+06
  2.5421290E+06  2.5361647E+06  2.5302015E+06  2.5242394E+06
  2.5182786E+06  2.5123191E+06  2.5063612E+06  2.5004049E+06
  2.4944503E+06  2.4884976E+06  2.4825468E+06  2.4765980E+06
  2.4706514E+06  2.4647071E+06  2.4587652E+06  2.4528257E+06
  2.4468888E+06  2.4409546E+06  2.4350232E+06  2.4290947E+06
  2.4231691E+06  2.4172466E+06  2.4113273E+06  2.4054113E+06
  2.3994987E+06  2.3935895E+06  2.3876838E+06  2.3817819E+06
  2.3758836E+06  2.3699892E+06  2.3640987E+06  2.3582122E+06
  2.3523298E+06  2.3464517E+06  2.3405777E+06  2.3347082E+06
  2.3288430E+06  2.3229824E+06  2.3171264E+06  2.3112751E+06
  2.3054286E+06  2.2995869E+06  2.2937502E+06  2.2879184E+06
  2.2820917E+06  2.2762702E+06  2.2704540E+06  2.2646430E+06
  2.2588374E+06  2.2530373E+06  2.2472428E+06  2.2414538E+06
  2.2356705E+06  2.2298930E+06  2.2241212E+06  2.2183554E+06
  2.2125955E+06  2.2068417E+06  2.2010939E+06  2.1953523E+06
  2.1896168E+06  2.1838877E+06  2.1781650E+06  2.1724486E+06
  2.1667387E+06  2.1610353E+06  2.1553386E+06  2.1496485E+06
  2.1439651E+06  2.1382884E+06  2.1326186E+06  2.1269557E+06
  2.1212998E+06  2.1156508E+06  2.1100089E+06  2.1043741E+06
  2.0987465E+06  2.0931261E+06  2.0875130E+06  2.0819071E+06
  2.0763087E+06  2.0707177E+06  2.0651342E+06  2.0595582E+06
  2.0539897E+06  2.0484289E+06  2.0428758E+06  2.0373303E+06
  2.0317927E+06  2.0262628E+06  2.0207409E+06  2.0152268E+06
  2.0097206E+06  2.0042225E+06  1.9987324E+06  1.9932503E+06
  1.9877764E+06  1.9823106E+06  1.9768531E+06  1.9714037E+06
  1.9659627E+06  1.9605299E+06  1.9551056E+06  1.9496896E+06
  1.9442820E+06  1.9388830E+06  1.9334924E+06  1.9281104E+06
  1.9227369E+06  1.9173721E+06  1.9120159E+06  1.9066684E+06
  1.9013296E+06  1.8959996E+06  1.8906783E+06  1.8853659E+06
  1.8800623E+06  1.8747676E+06  1.8694818E+06  1.8642049E+06
  1.8589370E+06  1.8536781E+06  1.8484282E+06  1.8431873E+06
  1.8379556E+06  1.8327329E+06  1.8275194E+06  1.8223151E+06
  1.8171199E+06  1.8119340E+06  1.8067573E+06  1.8015898E+06
  1.7964317E+06  1.7912828E+06  1.7861433E+06  1.7810132E+06
  1.7758924E+06  1.7707811E+06  1.7656792E+06  1.7605867E+06
  1.7555037E+06  1.7504301E+06  1.7453661E+06  1.7403116E+06
  1.7352667E+06  1.7302313E+06  1.7252056E+06  1.7201894E+06
  1.7151828E+06  1.7101859E+06  1.7051987E+06  1.7002211E+06
  1.6952532E+06  1.6902951E+06  1.6853466E+06  1.6804079E+06
  1.6754790E+06  1.6705598E+06  1.6656504E+06  1.6607508E+06
  1.6558610E+06  1.6509810E+06  1.6461109E+06  1.6412507E+06
  1.6364003E+06  1.6315597E+06  1.6267291E+06  1.6219084E+06
  1.6170976E+06  1.6122967E+06  1.6075057E+06  1.6027247E+06
  1.5979536E+06  1.5931925E+06  1.5884413E+06  1.5837002E+06
  1.5789690E+06  1.5742479E+06  1.5695367E+06  1.5648356E+06
  1.5601444E+06  1.5554633E+06  1.5507923E+06  1.5461313E+06
  1.5414803E+06  1.5368394E+06  1.5322086E+06  1.5275878E+06
  1.5229771E+06  1.5183765E+06  1.5137859E+06  1.5092055E+06
  1.5046351E+06  1.5000749E+06  1.4955247E+06  1.4909847E+06
  1.4864547E+06  1.4819349E+06  1.4774251E+06  1.4729255E+06
  1.4684361E+06  1.4639567E+06  1.4594874E+06  1.4550283E+06
  1.4505793E+06  1.4461405E+06  1.4417117E+06  1.4372931E+06
  1.4328846E+06  1.4284863E+06  1.4240981E+06  1.4197200E+06
  1.4153520E+06  1.4109942E+06  1.4066465E+06  1.4023089E+06
  1.3979815E+06  1.3936642E+06  1.3893570E+06  1.3850599E+06
  1.3807729E+06  1.3764961E+06  1.3722294E+06  1.3679728E+06
  1.3637263E+06  1.3594899E+06  1.3552636E+06  1.3510475E+06
  1.3468414E+06  1.3426454E+06  1.3384595E+06  1.3342837E+06
  1.3301180E+06  1.3259623E+06  1.3218167E+06  1.3176812E+06
  1.3135558E+06  1.3094404E+06  1.3053351E+06  1.3012398E+06
  1.2971545E+06  1.2930793E+06  1.2890142E+06  1.2849590E+06
  1.2809139E+06  1.2768788E+06  1.2728537E+06  1.2688386E+06
  1.2648335E+06  1.2608384E+06  1.2568532E+06  1.2528780E+06
  1.2489128E+06  1.2449576E+06  1.2410123E+06  1.2370769E+06
  1.2331515E+06  1.2292360E+06  1.2253304E+06  1.2214347E+06
  1.2175489E+06  1.2136731E+06  1.2098071E+06  1.2059509E+06
  1.2021047E+06  1.1982683E+06  1.1944417E+06  1.1906250E+06
  1.1868181E+06  1.1830210E+06  1.1792338E+06  1.1754563E+06
  1.1716886E+06  1.1679308E+06  1.1641826E+06  1.1604443E+06
  1.1567156E+06  1.1529968E+06  1.1492876E+06  1.1455882E+06
  1.1418984E+06  1.1382184E+06  1.1345480E+06  1.1308874E+06
  1.1272363E+06  1.1235950E+06  1.1199632E+06  1.1163411E+06
  1.1127286E+06  1.1091257E+06  1.1055324E+06  1.1019487E+06
  1.0983746E+06  1.0948100E+06  1.0912549E+06  1.0877094E+06
  1.0841734E+06  1.0806469E+06  1.0771299E+06  1.0736224E+06
  1.0701243E+06  1.0666357E+06  1.0631565E+06  1.0596868E+06
  1.0562265E+06  1.0527756E+06  1.0493340E+06  1.0459019E+06
  1.0424791E+06  1.0390657E+06  1.0356615E+06  1.0322668E+06
  1.0288813E+06  1.0255051E+06  1.0221382E+06  1.0187806E+06
  1.0154322E+06  1.0120931E+06  1.0087632E+06  1.0054425E+06
  1.0021309E+06  9.9882862E+05  9.9553546E+05  9.9225146E+05
  9.8897659E+05  9.8571085E+05  9.8245421E+05  9.7920668E+05
  9.7596822E+05  9.7273883E+05  9.6951849E+05  9.6630718E+05
  9.6310490E+05  9.5991162E+05  9.5672733E+05  9.5355201E+05
  9.5038566E+05  9.4722825E+05  9.4407978E+05  9.4094021E+05
  9.3780955E+05  9.3468777E+05  9.3157486E+05  9.2847080E+05
  9.2537558E+05  9.2228918E+05  9.1921159E+05  9.1614278E+05
  9.1308276E+05  9.1003149E+05  9.0698896E+05  9.0395516E+05
  9.0093008E+05  8.9791368E+05  8.9490597E+05  8.9190692E+05
  8.8891652E+05  8.8593476E+05  8.8296160E+05  8.7999705E+05
  8.7704108E+05  8.7409367E+05  8.7115482E+05  8.6822450E+05
  8.6530270E+05  8.6238940E+05  8.5948459E+05  8.5658824E+05
  8.5370035E+05  8.5082090E+05  8.4794986E+05  8.4508723E+05
  8.4223298E+05  8.3938711E+05  8.3654958E+05  8.3372040E+05
  8.3089953E+05  8.2808697E+05  8.2528270E+05  8.2248670E+05
  8.1969895E+05  8.1691943E+05  8.1414814E+05  8.1138505E+05
  8.0863015E+05  8.0588341E+05  8.0314483E+05  8.0041439E+05
  7.9769206E+05  7.9497784E+05  7.9227170E+05  7.8957363E+05
  7.8688361E+05  7.8420163E+05  7.8152766E+05  7.7886170E+05
  7.7620372E+05  7.7355370E+05  7.7091164E+05  7.6827750E+05
  7.6565129E+05  7.6303297E+05  7.6042253E+05  7.5781996E+05
  7.5522523E+05  7.5263833E+05  7.5005925E+05  7.4748796E+05
  7.4492445E+05  7.4236871E+05  7.3982070E+05  7.3728043E+05
  7.3474786E+05  7.3222299E+05  7.2970580E+05  7.2719626E+05
  7.2469436E+05  7.2220009E+05  7.1971343E+05  7.1723435E+05
  7.1476285E+05  7.1229891E+05  7.0984250E+05  7.0739361E+05
  7.0495223E+05  7.0251834E+05  7.0009191E+05  6.9767294E+05
  6.9526140E+05  6.9285728E+05  6.9046056E+05  6.8807123E+05
  6.8568926E+05  6.8331464E+05  6.8094735E+05  6.7858738E+05
  6.7623471E+05  6.7388931E+05  6.7155118E+05  6.6922030E+05
  6.6689664E+05  6.6458020E+05  6.6227095E+05  6.5996888E+05
  6.5767397E+05  6.5538620E+05  6.5310556E+05  6.5083203E+05
  6.4856559E+05  6.4630623E+05  6.4405392E+05  6.4180865E+05
  6.3957041E+05  6.3733917E+05  6.3511493E+05  6.3289765E+05
  6.3068733E+05  6.2848395E+05  6.2628749E+05  6.2409793E+05
  6.2191526E+05  6.1973946E+05  6.1757052E+05  6.1540841E+05
  6.1325312E+05  6.1110463E+05  6.0896292E+05  6.0682799E+05
  6.0469980E+05  6.0257835E+05  6.0046362E+05  5.9835559E+05
  5.9625424E+05  5.9415956E+05  5.9207153E+05  5.8999013E+05
  5.8791535E+05  5.8584717E+05  5.8378557E+05  5.8173054E+05
  5.7968205E+05  5.7764010E+05  5.7560467E+05  5.7357573E+05
  5.7155328E+05  5.6953729E+05  5.6752775E+05  5.6552464E+05
  5.6352795E+05  5.6153766E+05  5.5955375E+05  5.5757620E+05
  5.5560501E+05  5.5364014E+05  5.5168160E+05  5.4972935E+05
  5.4778339E+05  5.4584369E+05  5.4391024E+05  5.4198303E+05
  5.4006204E+05  5.3814724E+05  5.3623863E+05  5.3433619E+05
  5.3243990E+05  5.3054975E+05  5.2866571E+05  5.2678778E+05
  5.2491594E+05  5.2305016E+05  5.2119044E+05  5.1933676E+05
  5.1748910E+05  5.1564745E+05  5.1381178E+05  5.1198209E+05
  5.1015836E+05  5.0834056E+05  5.0652870E+05  5.0472274E+05
  5.0292267E+05  5.0112849E+05  4.9934016E+05  4.9755768E+05
  4.9578103E+05  4.9401019E+05  4.9224515E+05  4.9048589E+05
  4.8873239E+05  4.8698465E+05  4.8524264E+05  4.8350635E+05
  4.8177576E+05  4.8005086E+05  4.7833163E+05  4.7661806E+05
  4.7491013E+05  4.7320782E+05  4.7151112E+05  4.6982002E+05
  4.6813449E+05  4.6645452E+05  4.6478010E+05  4.6311121E+05
  4.6144784E+05  4.5978997E+05  4.5803973E+05  4.5639602E+05
  4.5475981E+05  4.5313109E+05  4.5150982E+05  4.4989599E+05
  4.4828956E+05  4.4669053E+05  4.4509887E+05  4.4351454E+05
  4.4193754E+05  4.4036783E+05  4.3880539E+05  4.3725020E+05
  4.3570223E+05  4.3416147E+05  4.3262788E+05  4.3110145E+05
  4.2958214E+05  4.2806994E+05  4.2656482E+05  4.2506676E+05
  4.2357573E+05  4.2209170E+05  4.2061466E+05  4.1914458E+05
  4.1768143E+05  4.1622520E+05  4.1477584E+05  4.1333335E+05
  4.1189769E+05  4.1046884E+05  4.0904678E+05  4.0763147E+05
  4.0622290E+05  4.0482104E+05  4.0342586E+05  4.0203735E+05
  4.0065546E+05  3.9928019E+05  3.9791149E+05  3.9654936E+05
  3.9519375E+05  3.9384465E+05  3.9250203E+05  3.9116586E+05
  3.8983612E+05  3.8851279E+05  3.8719583E+05  3.8588522E+05
  3.8458093E+05  3.8328294E+05  3.8199122E+05  3.8070575E+05
  3.7942649E+05  3.7815343E+05  3.7688654E+05  3.7562578E+05
  3.7437114E+05  3.7312258E+05  3.7188009E+05  3.7064363E+05
  3.6941317E+05  3.6818870E+05  3.6697017E+05  3.6575758E+05
  3.6455088E+05  3.6335006E+05  3.6215508E+05  3.6096592E+05
  3.5978255E+05  3.5860495E+05  3.5743308E+05  3.5626693E+05
  3.5510646E+05  3.5395164E+05  3.5280246E+05  3.5165887E+05
  3.5052086E+05  3.4938840E+05  3.4826145E+05  3.4714000E+05
  3.4602401E+05  3.4491346E+05  3.4380832E+05  3.4270857E+05
  3.4161417E+05  3.4052509E+05  3.3944132E+05  3.3836281E+05
  3.3728955E+05  3.3622151E+05  3.3515866E+05  3.3410097E+05
  3.3304841E+05  3.3200096E+05  3.3095859E+05  3.2992127E+05
  3.2888897E+05  3.2786166E+05  3.2683933E+05  3.2582193E+05
  3.2480944E+05  3.2380184E+05  3.2279909E+05  3.2180117E+05
  3.2080806E+05  3.1981971E+05  3.1883611E+05  3.1785722E+05
  3.1688302E+05  3.1591348E+05  3.1494858E+05  3.1398828E+05
  3.1303255E+05  3.1208138E+05  3.1113472E+05  3.1019256E+05
  3.0925486E+05  3.0832160E+05  3.0739275E+05  3.0646828E+05
  3.0554816E+05  3.0463236E+05  3.0372086E+05  3.0281363E+05
  3.0191065E+05  3.0101187E+05  3.0011728E+05  2.9922685E+05
  2.9834054E+05  2.9745834E+05  2.9658021E+05  2.9570612E+05
  2.9483605E+05  2.9396997E+05  2.9310786E+05  2.9224967E+05
  2.9139540E+05  2.9054500E+05  2.8969845E+05  2.8885572E+05
  2.8801678E+05  2.8718162E+05  2.8635019E+05  2.8552247E+05
  2.8469844E+05  2.8387806E+05  2.8306131E+05  2.8224816E+05
  2.8143858E+05  2.8063255E+05  2.7983004E+05  2.7903101E+05
  2.7823545E+05  2.7744332E+05  2.7665460E+05  2.7586926E+05
  2.7508727E+05  2.7430860E+05  2.7353324E+05  2.7276114E+05
  2.7199228E+05  2.7122664E+05  2.7046419E+05  2.6970490E+05
  2.6894874E+05  2.6819569E+05  2.6744572E+05  2.6669880E+05
  2.6595491E+05  2.6521401E+05  2.6447609E+05  2.6374111E+05
  2.6300904E+05  2.6227987E+05  2.6155356E+05  2.6083009E+05
  2.6010943E+05  2.5939155E+05  2.5867642E+05  2.5796403E+05
  2.5725434E+05  2.5654732E+05  2.5584296E+05  2.5514122E+05
  2.5444208E+05  2.5374551E+05  2.5305149E+05  2.5235998E+05
  2.5167097E+05  2.5098442E+05  2.5030031E+05  2.4961862E+05
  2.4893931E+05  2.4826237E+05  2.4758776E+05  2.4691547E+05
  2.4624546E+05  2.4557771E+05  2.4491219E+05  2.4424888E+05
  2.4358776E+05  2.4292879E+05  2.4227195E+05  2.4161722E+05
  2.4096457E+05  2.4031397E+05  2.3966541E+05  2.3901885E+05
  2.3837428E+05  2.3773166E+05  2.3709097E+05  2.3645218E+05
  2.3581528E+05  2.3518024E+05  2.3454703E+05  2.3391562E+05
  2.3328600E+05  2.3265814E+05  2.3203201E+05  2.3140759E+05
  2.3078486E+05  2.3016379E+05  2.2954436E+05  2.2892655E+05
  2.2831032E+05  2.2769566E+05  2.2708255E+05  2.2647095E+05
  2.2586085E+05  2.2525222E+05  2.2464505E+05  2.2403929E+05
  2.2343494E+05  2.2283197E+05  2.2223036E+05  2.2163008E+05
  2.2103111E+05  2.2043344E+05  2.1983702E+05  2.1924185E+05
  2.1864790E+05  2.1805515E+05  2.1746357E+05  2.1687315E+05
  2.1628386E+05  2.1569567E+05  2.1510858E+05  2.1452255E+05
  2.1393757E+05  2.1335361E+05  2.1277065E+05  2.1218867E+05
  2.1160764E+05  2.1102756E+05  2.1044839E+05  2.0987011E+05
  2.0929271E+05  2.0871616E+05  2.0814045E+05  2.0756554E+05
  2.0699143E+05  2.0641809E+05  2.0584550E+05  2.0527363E+05
  2.0470248E+05  2.0413202E+05  2.0356223E+05  2.0299309E+05
  2.0242459E+05  2.0185669E+05  2.0128938E+05  2.0072265E+05
  2.0015647E+05  1.9959083E+05  1.9902570E+05  1.9846107E+05
  1.9789692E+05  1.9733323E+05  1.9676997E+05  1.9620714E+05
  1.9564472E+05  1.9508268E+05  1.9452101E+05  1.9395969E+05
  1.9339870E+05  1.9283803E+05  1.9227765E+05  1.9171756E+05
  1.9115773E+05  1.9059814E+05  1.9003878E+05  1.8947964E+05
  1.8892069E+05  1.8836192E+05  1.8780331E+05  1.8724484E+05
  1.8668651E+05  1.8612829E+05  1.8557017E+05  1.8501212E+05
  1.8445415E+05  1.8389622E+05  1.8333833E+05  1.8278046E+05
  1.8222260E+05  1.8166472E+05  1.8110682E+05  1.8054888E+05
  1.7999089E+05  1.7943282E+05  1.7887468E+05  1.7831643E+05
  1.7775808E+05  1.7719960E+05  1.7664098E+05  1.7608221E+05
  1.7552327E+05  1.7496415E+05  1.7440485E+05  1.7384533E+05
  1.7328560E+05  1.7272564E+05  1.7216544E+05  1.7160498E+05
  1.7104425E+05  1.7048324E+05  1.6992194E+05  1.6936034E+05
  1.6879842E+05  1.6823618E+05  1.6767360E+05  1.6711067E+05
  1.6654738E+05  1.6598372E+05  1.6541968E+05  1.6485525E+05
  1.6429042E+05  1.6372517E+05  1.6315951E+05  1.6259341E+05
  1.6202687E+05  1.6145988E+05  1.6089243E+05  1.6032451E+05
  1.5975611E+05  1.5918722E+05  1.5861784E+05  1.5804796E+05
  1.5747756E+05  1.5690664E+05  1.5633519E+05  1.5576321E+05
  1.5519068E+05  1.5461760E+05  1.5404397E+05  1.5346977E+05
  1.5289499E+05  1.5231964E+05  1.5174370E+05  1.5116716E+05
  1.5059003E+05  1.5001230E+05  1.4943395E+05  1.4885499E+05
  1.4827541E+05  1.4769520E+05  1.4711436E+05  1.4653289E+05
  1.4595077E+05  1.4536800E+05  1.4478459E+05  1.4420052E+05
  1.4361580E+05  1.4303041E+05  1.4244436E+05  1.4185763E+05
  1.4127024E+05  1.4068217E+05  1.4009342E+05  1.3950400E+05
  1.3891388E+05  1.3832309E+05  1.3773161E+05  1.3713943E+05
  1.3654657E+05  1.3595302E+05  1.3535877E+05  1.3476383E+05
  1.3416819E+05  1.3357186E+05  1.3297483E+05  1.3237710E+05
  1.3177868E+05  1.3117956E+05  1.3057975E+05  1.2997924E+05
  1.2937804E+05  1.2877614E+05  1.2817355E+05  1.2757027E+05
  1.2696630E+05  1.2636165E+05  1.2575630E+05  1.2515028E+05
  1.2454358E+05  1.2393619E+05  1.2332814E+05  1.2271941E+05
  1.2211001E+05  1.2149995E+05  1.2088923E+05  1.2027785E+05
  1.1966582E+05  1.1905314E+05  1.1843982E+05  1.1782586E+05
  1.1721126E+05  1.1659604E+05  1.1598019E+05  1.1536373E+05
  1.1474666E+05  1.1412898E+05  1.1351070E+05  1.1289184E+05
  1.1227238E+05  1.1165236E+05  1.1103176E+05  1.1041059E+05
  1.0978888E+05  1.0916662E+05  1.0854382E+05  1.0792049E+05
  1.0729664E+05  1.0667227E+05  1.0604741E+05  1.0542205E+05
  1.0479621E+05  1.0416989E+05  1.0354312E+05  1.0291588E+05
  1.0228821E+05  1.0166011E+05  1.0103158E+05  1.0040265E+05
  9.9773321E+04  9.9143606E+04  9.8513518E+04  9.7883070E+04
  9.7252273E+04  9.6621142E+04  9.5989689E+04  9.5357927E+04
  9.4725870E+04  9.4093532E+04  9.3460927E+04  9.2828069E+04
  9.2194974E+04  9.1561655E+04  9.0928128E+04  9.0294409E+04
  8.9660512E+04  8.9026455E+04  8.8392252E+04  8.7757921E+04
  8.7123478E+04  8.6488941E+04  8.5854325E+04  8.5219649E+04
  8.4584931E+04  8.3950188E+04  8.3315438E+04  8.2680701E+04
  8.2045994E+04  8.1411337E+04  8.0776750E+04  8.0142251E+04
  7.9507861E+04  7.8873599E+04  7.8239486E+04  7.7605543E+04
  7.6971790E+04  7.6338249E+04  7.5704942E+04  7.5071889E+04
  7.4439113E+04  7.3806636E+04  7.3174480E+04  7.2542669E+04
  7.1911226E+04  7.1280173E+04  7.0649535E+04  7.0019336E+04
  6.9389599E+04  6.8760349E+04  6.8131612E+04  6.7503411E+04
  6.6875772E+04  6.6248722E+04  6.5622285E+04  6.4996488E+04
  6.4371357E+04  6.3746920E+04  6.3123203E+04  6.2500233E+04
  6.1878038E+04  6.1256647E+04  6.0636087E+04  6.0016386E+04
  5.9397574E+04  5.8779679E+04  5.8162731E+04  5.7546760E+04
  5.6931796E+04  5.6317868E+04  5.5705007E+04  5.5093244E+04
  5.4482611E+04  5.3873138E+04  5.3264857E+04  5.2657801E+04
  5.2052002E+04  5.1447491E+04  5.0844304E+04  5.0242471E+04
  4.9642028E+04  4.9043007E+04  4.8445444E+04  4.7849372E+04
  4.7254826E+04  4.6661841E+04  4.6070453E+04  4.5480697E+04
  4.4892610E+04  4.4306227E+04  4.3721585E+04  4.3138721E+04
  4.2557673E+04  4.1978477E+04  4.1401172E+04  4.0825796E+04
  4.0252388E+04  3.9680985E+04  3.9111628E+04  3.8544356E+04
  3.7979208E+04  3.7416224E+04  3.6855446E+04  3.6296913E+04
  3.5740667E+04  3.5186749E+04  3.4635200E+04  3.4086064E+04
  3.3539381E+04  3.2995195E+04  3.2453549E+04  3.1914485E+04
  3.1378048E+04  3.0844282E+04  3.0313231E+04  2.9784939E+04
  2.9259452E+04  2.8736814E+04  2.8217071E+04  2.7700270E+04
  2.7186456E+04  2.6675677E+04  2.6167978E+04  2.5663408E+04
  2.5162013E+04  2.4663843E+04  2.4168945E+04  2.3677367E+04
  2.3189159E+04  2.2704371E+04  2.2223051E+04  2.1745250E+04
  2.1271018E+04  2.0800405E+04  2.0333464E+04  1.9870244E+04
  1.9410799E+04  1.8955179E+04  1.8503437E+04  1.8055627E+04
  1.7611800E+04  1.7172011E+04  1.6736314E+04  1.6304761E+04
  1.5877409E+04  1.5454312E+04  1.5035525E+04  1.4621103E+04
  1.4211103E+04  1.3805580E+04  1.3404592E+04  1.3008195E+04
  1.2616447E+04  1.2229405E+04  1.1847128E+04  1.1469674E+04
  1.1097101E+04  1.0729468E+04  1.0366836E+04  1.0009264E+04
  9.6568123E+03  9.3095413E+03  8.9675121E+03  8.6307860E+03
  8.2994247E+03  7.9734902E+03  7.6530449E+03  7.3381516E+03
  7.0288734E+03  6.7252738E+03  6.4274169E+03  6.1353667E+03
  5.8491879E+03  5.5689456E+03  5.2947051E+03  5.0265322E+03
  4.7644929E+03  4.5086539E+03  4.2590819E+03  4.0158443E+03
  3.7790086E+03  3.5486429E+03  3.3248156E+03  3.1075954E+03
  2.8970515E+03  2.6932534E+03  2.4962711E+03  2.3061749E+03
  2.1230354E+03  1.9469237E+03  1.7779113E+03  1.6160701E+03
  1.4614721E+03  1.3141902E+03  1.1742972E+03  1.0418665E+03
  9.1697204E+02  7.9968790E+02  6.9008865E+02  5.8824927E+02
  4.9424510E+02  4.0815190E+02  3.3004581E+02  2.6000336E+02
  1.9810148E+02  1.4441752E+02  9.9029200E+01  6.2014643E+01
  3.3452377E+01  1.3421328E+01  2.0008222E+00 -1.9847136E+00
 -5.4026792E+00 -8.8169785E+00 -1.2227597E+01 -1.5634521E+01
 -1.9037736E+01 -2.2437227E+01 -2.5832981E+01 -2.9224983E+01
 -3.2613219E+01 -3.5997675E+01 -3.9378336E+01 -4.2755188E+01
 -4.6128217E+01 -4.9497409E+01 -5.2862749E+01 -5.6224223E+01
 -5.9581817E+01 -6.2935517E+01 -6.6285308E+01 -6.9631176E+01
 -7.2973107E+01 -7.6311087E+01 -7.9645101E+01 -8.2975135E+01
 -8.6301175E+01 -8.9623207E+01 -9.2941216E+01 -9.6255188E+01
 -9.9565109E+01 -1.0287096E+02 -1.0617274E+02 -1.0947042E+02
 -1.1276400E+02 -1.1605345E+02 -1.1933876E+02 -1.2261993E+02
 -1.2589692E+02 -1.2916974E+02 -1.3243837E+02 -1.3570279E+02
 -1.3896298E+02 -1.4221894E+02 -1.4547065E+02 -1.4871809E+02
 -1.5196125E+02 -1.5520012E+02 -1.5843469E+02 -1.6166493E+02
 -1.6489083E+02 -1.6811239E+02 -1.7132958E+02 -1.7454239E+02
 -1.7775080E+02 -1.8095481E+02 -1.8415440E+02 -1.8734955E+02
 -1.9054025E+02 -1.9372649E+02 -1.9690825E+02 -2.0008551E+02
 -2.0325827E+02 -2.0642651E+02 -2.0959021E+02 -2.1274936E+02
 -2.1590394E+02 -2.1905395E+02 -2.2219937E+02 -2.2534017E+02
 -2.2847636E+02 -2.3160791E+02 -2.3473481E+02 -2.3785705E+02
 -2.4097461E+02 -2.4408747E+02 -2.4719563E+02 -2.5029907E+02
 -2.5339778E+02 -2.5649173E+02 -2.5958092E+02 -2.6266533E+02
 -2.6574495E+02 -2.6881976E+02 -2.7188975E+02 -2.7495491E+02
 -2.7801522E+02 -2.8107066E+02 -2.8412123E+02 -2.8716690E+02
 -2.9020767E+02 -2.9324351E+02 -2.9627442E+02 -2.9930039E+02
 -3.0232139E+02 -3.0533741E+02 -3.0834844E+02 -3.1135446E+02
 -3.1435546E+02 -3.1735143E+02 -3.2034235E+02 -3.2332821E+02
 -3.2630899E+02 -3.2928467E+02 -3.3225526E+02 -3.3522072E+02
 -3.3818104E+02 -3.4113622E+02 -3.4408624E+02 -3.4703107E+02
 -3.4997072E+02 -3.5290516E+02 -3.5583438E+02 -3.5875837E+02
 -3.6167711E+02 -3.6459058E+02 -3.6749878E+02 -3.7040169E+02
 -3.7329929E+02 -3.7619157E+02 -3.7907852E+02 -3.8196012E+02
 -3.8483636E+02 -3.8770722E+02 -3.9057269E+02 -3.9343275E+02
 -3.9628740E+02 -3.9913661E+02 -4.0198037E+02 -4.0481867E+02
 -4.0765150E+02 -4.1047883E+02 -4.1330066E+02 -4.1611697E+02
 -4.1892774E+02 -4.2173297E+02 -4.2453264E+02 -4.2732673E+02
 -4.3011523E+02 -4.3289812E+02 -4.3567540E+02 -4.3844704E+02
 -4.4121303E+02 -4.4397337E+02 -4.4672802E+02 -4.4947699E+02
 -4.5222025E+02 -4.5495779E+02 -4.5768960E+02 -4.6041567E+02
 -4.6313597E+02 -4.6585049E+02 -4.6855923E+02 -4.7126216E+02
 -4.7395927E+02 -4.7665055E+02 -4.7933598E+02 -4.8201555E+02
 -4.8468925E+02 -4.8735705E+02 -4.9001895E+02 -4.9267493E+02
 -4.9532498E+02 -4.9796909E+02 -5.0060723E+02 -5.0323940E+02
 -5.0586557E+02 -5.0848575E+02 -5.1109990E+02 -5.1370802E+02
 -5.1631010E+02 -5.1890611E+02 -5.2149605E+02 -5.2407990E+02
 -5.2665765E+02 -5.2922928E+02 -5.3179478E+02 -5.3435413E+02
 -5.3690732E+02 -5.3945433E+02 -5.4199516E+02 -5.4452978E+02
 -5.4705818E+02 -5.4958036E+02 -5.5209628E+02 -5.5460595E+02
 -5.5710934E+02 -5.5960644E+02 -5.6209724E+02 -5.6458172E+02
 -5.6705987E+02 -5.6953167E+02 -5.7199712E+02 -5.7445619E+02
 -5.7690887E+02 -5.7935514E+02 -5.8179500E+02 -5.8422843E+02
 -5.8665541E+02 -5.8907594E+02 -5.9148998E+02 -5.9389754E+02
 -5.9629860E+02 -5.9869314E+02 -6.0108115E+02 -6.0346261E+02
 -6.0583752E+02 -6.0820585E+02 -6.1056759E+02 -6.1292273E+02
 -6.1527125E+02 -6.1761314E+02 -6.1994838E+02 -6.2227697E+02
 -6.2459888E+02 -6.2691411E+02 -6.2922263E+02 -6.3152443E+02
 -6.3381951E+02 -6.3610784E+02 -6.3838941E+02 -6.4066420E+02
 -6.4293221E+02 -6.4519342E+02 -6.4744781E+02 -6.4969537E+02
 -6.5193608E+02 -6.5416994E+02 -6.5639692E+02 -6.5861701E+02
 -6.6083021E+02 -6.6303648E+02 -6.6523583E+02 -6.6742823E+02
 -6.6961367E+02 -6.7179214E+02 -6.7396362E+02 -6.7612811E+02
 -6.7828557E+02 -6.8043600E+02 -6.8257939E+02 -6.8471573E+02
 -6.8684498E+02 -6.8896716E+02 -6.9108223E+02 -6.9319018E+02
 -6.9529100E+02 -6.9738468E+02 -6.9947121E+02 -7.0155055E+02
 -7.0362272E+02 -7.0568768E+02 -7.0774542E+02 -7.0979594E+02
 -7.1183921E+02 -7.1387522E+02 -7.1590397E+02 -7.1792542E+02
 -7.1993957E+02 -7.2194641E+02 -7.2394592E+02 -7.2593809E+02
 -7.2792289E+02 -7.2990033E+02 -7.3187038E+02 -7.3383302E+02
 -7.3578826E+02 -7.3773606E+02 -7.3967642E+02 -7.4160932E+02
 -7.4353475E+02 -7.4545270E+02 -7.4736314E+02 -7.4926607E+02
 -7.5116147E+02 -7.5304932E+02 -7.5492962E+02 -7.5680235E+02
 -7.5866749E+02 -7.6052503E+02 -7.6237496E+02 -7.6421725E+02
 -7.6605191E+02 -7.6787890E+02 -7.6969823E+02 -7.7150987E+02
 -7.7331381E+02 -7.7511003E+02 -7.7689853E+02 -7.7867929E+02
 -7.8045228E+02 -7.8221751E+02 -7.8397495E+02 -7.8572459E+02
 -7.8746641E+02 -7.8920041E+02 -7.9092657E+02 -7.9264486E+02
 -7.9435529E+02 -7.9605783E+02 -7.9775247E+02 -7.9943920E+02
 -8.0111800E+02 -8.0278886E+02 -8.0445176E+02 -8.0610669E+02
 -8.0775364E+02 -8.0939258E+02 -8.1102351E+02 -8.1264642E+02
 -8.1426128E+02 -8.1586809E+02 -8.1746682E+02 -8.1905747E+02
 -8.2064002E+02 -8.2221446E+02 -8.2378077E+02 -8.2533894E+02
 -8.2688895E+02 -8.2843079E+02 -8.2996444E+02 -8.3148990E+02
 -8.3300715E+02 -8.3451616E+02 -8.3601694E+02 -8.3750946E+02
 -8.3899371E+02 -8.4046967E+02 -8.4193734E+02 -8.4339669E+02
 -8.4484772E+02 -8.4629040E+02 -8.4772473E+02 -8.4915069E+02
 -8.5056826E+02 -8.5197744E+02 -8.5337820E+02 -8.5477054E+02
 -8.5615443E+02 -8.5752987E+02 -8.5889684E+02 -8.6025533E+02
 -8.6160531E+02 -8.6294679E+02 -8.6427974E+02 -8.6560414E+02
 -8.6692000E+02 -8.6822728E+02 -8.6952598E+02 -8.7081608E+02
 -8.7209757E+02 -8.7337043E+02 -8.7463465E+02 -8.7589021E+02
 -8.7713711E+02 -8.7837532E+02 -8.7960484E+02 -8.8082564E+02
 -8.8203772E+02 -8.8324105E+02 -8.8443563E+02 -8.8562145E+02
 -8.8679848E+02 -8.8796671E+02 -8.8912613E+02 -8.9027672E+02
 -8.9141847E+02 -8.9255137E+02 -8.9367540E+02 -8.9479055E+02
 -8.9589680E+02 -8.9699413E+02 -8.9808255E+02 -8.9916202E+02
 -9.0023253E+02 -9.0129408E+02 -9.0234665E+02 -9.0339022E+02
 -9.0442477E+02 -9.0545031E+02 -9.0646680E+02 -9.0747423E+02
 -9.0847260E+02 -9.0946189E+02 -9.1044208E+02 -9.1141316E+02
 -9.1237511E+02 -9.1332792E+02 -9.1427158E+02 -9.1520607E+02
 -9.1613138E+02 -9.1704750E+02 -9.1795440E+02 -9.1885207E+02
 -9.1974051E+02 -9.2061969E+02 -9.2148961E+02 -9.2235024E+02
 -9.2320158E+02 -9.2404360E+02 -9.2487630E+02 -9.2569966E+02
 -9.2651367E+02 -9.2731831E+02 -9.2811357E+02 -9.2889943E+02
 -9.2967588E+02 -9.3044291E+02 -9.3120050E+02 -9.3194863E+02
 -9.3268730E+02 -9.3341648E+02 -9.3413617E+02 -9.3484635E+02
 -9.3554700E+02 -9.3623812E+02 -9.3691968E+02 -9.3759168E+02
 -9.3825409E+02 -9.3890691E+02 -9.3955012E+02 -9.4018370E+02
 -9.4080765E+02 -9.4142194E+02 -9.4202656E+02 -9.4262151E+02
 -9.4320676E+02 -9.4378229E+02 -9.4434811E+02 -9.4490419E+02
 -9.4545051E+02 -9.4598707E+02 -9.4651384E+02 -9.4703082E+02
 -9.4753799E+02 -9.4803534E+02 -9.4852285E+02 -9.4900050E+02
 -9.4946829E+02 -9.4992620E+02 -9.5037422E+02 -9.5081232E+02
 -9.5124050E+02 -9.5165875E+02 -9.5206704E+02 -9.5246536E+02
 -9.5285371E+02 -9.5323206E+02 -9.5360040E+02 -9.5395871E+02
 -9.5430699E+02 -9.5464522E+02 -9.5497338E+02 -9.5529146E+02
 -9.5559945E+02 -9.5589732E+02 -9.5618508E+02 -9.5646269E+02
 -9.5673016E+02 -9.5698746E+02 -9.5723458E+02 -9.5747150E+02
 -9.5769821E+02 -9.5791471E+02 -9.5812096E+02 -9.5831697E+02
 -9.5850271E+02 -9.5867816E+02 -9.5884333E+02 -9.5899818E+02
 -9.5914272E+02 -9.5927691E+02 -9.5940076E+02 -9.5951424E+02
 -9.5961734E+02 -9.5971004E+02 -9.5979234E+02 -9.5986421E+02
 -9.5992565E+02 -9.5997664E+02 -9.6001716E+02 -9.6004720E+02
 -9.6006675E+02 -9.6007579E+02 -9.6007431E+02 -9.6006229E+02
 -9.6003972E+02 -9.6000659E+02 -9.5996288E+02 -9.5990857E+02
 -9.5984366E+02 -9.5976812E+02 -9.5968195E+02 -9.5958512E+02
 -9.5947763E+02 -9.5935947E+02 -9.5923061E+02 -9.5909104E+02
 -9.5894075E+02 -9.5877972E+02 -9.5860795E+02 -9.5842541E+02
 -9.5823209E+02 -9.5802797E+02 -9.5781305E+02 -9.5758731E+02
 -9.5735073E+02 -9.5710331E+02 -9.5684501E+02 -9.5657584E+02
 -9.5629578E+02 -9.5600481E+02 -9.5570292E+02 -9.5539009E+02
 -9.5506631E+02 -9.5473157E+02 -9.5438585E+02 -9.5402914E+02
 -9.5366142E+02 -9.5328268E+02 -9.5289290E+02 -9.5249208E+02
 -9.5208019E+02 -9.5165722E+02 -9.5122316E+02 -9.5077799E+02
 -9.5032171E+02 -9.4985428E+02 -9.4937571E+02 -9.4888598E+02
 -9.4838506E+02 -9.4787296E+02 -9.4734965E+02 -9.4681511E+02
 -9.4626934E+02 -9.4571233E+02 -9.4514405E+02 -9.4456449E+02
 -9.4397364E+02 -9.4337148E+02 -9.4275801E+02 -9.4213319E+02
 -9.4149703E+02 -9.4084951E+02 -9.4019061E+02 -9.3952032E+02
 -9.3883862E+02 -9.3814550E+02 -9.3744094E+02 -9.3672494E+02
 -9.3599748E+02 -9.3525853E+02 -9.3450810E+02 -9.3374616E+02
 -9.3297270E+02 -9.3218771E+02 -9.3139116E+02 -9.3058306E+02
 -9.2976337E+02 -9.2893210E+02 -9.2808922E+02 -9.2723472E+02
 -9.2636859E+02 -9.2549081E+02 -9.2460136E+02 -9.2370024E+02
 -9.2278743E+02 -9.2186292E+02 -9.2092668E+02 -9.1997871E+02
 -9.1901899E+02 -9.1804751E+02 -9.1706425E+02 -9.1606920E+02
 -9.1506235E+02 -9.1404368E+02 -9.1301317E+02 -9.1197082E+02
 -9.1091660E+02 -9.0985051E+02 -9.0877253E+02 -9.0768264E+02
 -9.0658083E+02 -9.0546709E+02 -9.0434140E+02 -9.0320375E+02
 -9.0205413E+02 -9.0089251E+02 -8.9971889E+02 -8.9853325E+02
 -8.9733558E+02 -8.9612586E+02 -8.9490408E+02 -8.9367022E+02
 -8.9242427E+02 -8.9116622E+02 -8.8989605E+02 -8.8861374E+02
 -8.8731929E+02 -8.8601268E+02 -8.8469389E+02 -8.8336291E+02
 -8.8201973E+02 -8.8066433E+02 -8.7929670E+02 -8.7791682E+02
 -8.7652467E+02 -8.7512026E+02 -8.7370355E+02 -8.7227454E+02
 -8.7083321E+02 -8.6937955E+02 -8.6791354E+02 -8.6643517E+02
 -8.6494443E+02 -8.6344129E+02 -8.6192576E+02 -8.6039780E+02
 -8.5885741E+02 -8.5730458E+02 -8.5573929E+02 -8.5416152E+02
 -8.5257126E+02 -8.5096849E+02 -8.4935321E+02 -8.4772540E+02
 -8.4608504E+02 -8.4443212E+02 -8.4276663E+02 -8.4108855E+02
 -8.3939786E+02 -8.3769456E+02 -8.3597862E+02 -8.3425004E+02
 -8.3250880E+02 -8.3075488E+02 -8.2898828E+02 -8.2720897E+02
 -8.2541694E+02 -8.2361219E+02 -8.2179468E+02 -8.1996442E+02
 -8.1812138E+02 -8.1626556E+02 -8.1439693E+02 -8.1251548E+02
 -8.1062121E+02 -8.0871408E+02 -8.0679410E+02 -8.0486124E+02
 -8.0291550E+02 -8.0095685E+02 -7.9898529E+02 -7.9700079E+02
 -7.9500335E+02 -7.9299295E+02 -7.9096958E+02 -7.8893321E+02
 -7.8687502E+02 -7.8482631E+02 -7.8278383E+02 -7.8074754E+02
 -7.7871743E+02 -7.7669347E+02 -7.7467565E+02 -7.7266394E+02
 -7.7065833E+02 -7.6865878E+02 -7.6666529E+02 -7.6467782E+02
 -7.6269636E+02 -7.6072089E+02 -7.5875139E+02 -7.5678783E+02
 -7.5483020E+02 -7.5287848E+02 -7.5093264E+02 -7.4899266E+02
 -7.4705853E+02 -7.4513022E+02 -7.4320772E+02 -7.4129100E+02
 -7.3938005E+02 -7.3747484E+02 -7.3557536E+02 -7.3368158E+02
 -7.3179349E+02 -7.2991106E+02 -7.2803428E+02 -7.2616313E+02
 -7.2429759E+02 -7.2243763E+02 -7.2058325E+02 -7.1873442E+02
 -7.1689111E+02 -7.1505333E+02 -7.1322103E+02 -7.1139421E+02
 -7.0957285E+02 -7.0775693E+02 -7.0594642E+02 -7.0414132E+02
 -7.0234160E+02 -7.0054724E+02 -6.9875823E+02 -6.9697454E+02
 -6.9519617E+02 -6.9342309E+02 -6.9165528E+02 -6.8989273E+02
 -6.8813541E+02 -6.8638332E+02 -6.8463643E+02 -6.8289472E+02
 -6.8115818E+02 -6.7942679E+02 -6.7770053E+02 -6.7597939E+02
 -6.7426334E+02 -6.7255238E+02 -6.7084648E+02 -6.6914562E+02
 -6.6744979E+02 -6.6575898E+02 -6.6407316E+02 -6.6239231E+02
 -6.6071643E+02 -6.5904550E+02 -6.5737949E+02 -6.5571839E+02
 -6.5406219E+02 -6.5241086E+02 -6.5076440E+02 -6.4912279E+02
 -6.4748600E+02 -6.4585402E+02 -6.4422685E+02 -6.4260445E+02
 -6.4098682E+02 -6.3937394E+02 -6.3776579E+02 -6.3616235E+02
 -6.3456362E+02 -6.3296958E+02 -6.3138020E+02 -6.2979548E+02
 -6.2821539E+02 -6.2663993E+02 -6.2506908E+02 -6.2350282E+02
 -6.2194113E+02 -6.2038401E+02 -6.1883143E+02 -6.1728339E+02
 -6.1573986E+02 -6.1420083E+02 -6.1266629E+02 -6.1113622E+02
 -6.0961060E+02 -6.0808943E+02 -6.0657268E+02 -6.0506035E+02
 -6.0355241E+02 -6.0204885E+02 -6.0054967E+02 -5.9905483E+02
 -5.9756434E+02 -5.9607817E+02 -5.9459631E+02 -5.9311875E+02
 -5.9164547E+02 -5.9017645E+02 -5.8871169E+02 -5.8725117E+02
 -5.8579488E+02 -5.8434279E+02 -5.8289491E+02 -5.8145121E+02
 -5.8001167E+02 -5.7857630E+02 -5.7714507E+02 -5.7571796E+02
 -5.7429497E+02 -5.7287609E+02 -5.7146129E+02 -5.7005056E+02
 -5.6864390E+02 -5.6724128E+02 -5.6584270E+02 -5.6444814E+02
 -5.6305759E+02 -5.6167104E+02 -5.6028846E+02 -5.5890986E+02
 -5.5753521E+02 -5.5616450E+02 -5.5479772E+02 -5.5343486E+02
 -5.5207591E+02 -5.5072084E+02 -5.4936966E+02 -5.4802234E+02
 -5.4667887E+02 -5.4533925E+02 -5.4400345E+02 -5.4267147E+02
 -5.4134329E+02 -5.4001891E+02 -5.3869830E+02 -5.3738146E+02
 -5.3606837E+02 -5.3475902E+02 -5.3345341E+02 -5.3215151E+02
 -5.3085331E+02 -5.2955881E+02 -5.2826799E+02 -5.2698084E+02
 -5.2569735E+02 -5.2441751E+02 -5.2314129E+02 -5.2186870E+02
 -5.2059972E+02 -5.1933434E+02 -5.1807254E+02 -5.1681432E+02
 -5.1555966E+02 -5.1430856E+02 -5.1306100E+02 -5.1181696E+02
 -5.1057644E+02 -5.0933943E+02 -5.0810592E+02 -5.0687589E+02
 -5.0564933E+02 -5.0442623E+02 -5.0320658E+02 -5.0199037E+02
 -5.0077759E+02 -4.9956823E+02 -4.9836227E+02 -4.9715971E+02
 -4.9596053E+02 -4.9476472E+02 -4.9357228E+02 -4.9238319E+02
 -4.9119744E+02 -4.9001502E+02 -4.8883592E+02 -4.8766012E+02
 -4.8648763E+02 -4.8531842E+02 -4.8415249E+02 -4.8298983E+02
 -4.8183042E+02 -4.8067426E+02 -4.7952134E+02 -4.7837163E+02
 -4.7722515E+02 -4.7608187E+02 -4.7494178E+02 -4.7380487E+02
 -4.7267114E+02 -4.7154058E+02 -4.7041317E+02 -4.6928890E+02
 -4.6816776E+02 -4.6704975E+02 -4.6593485E+02 -4.6482306E+02
 -4.6371436E+02 -4.6260874E+02 -4.6150620E+02 -4.6040672E+02
 -4.5931029E+02 -4.5821692E+02 -4.5712657E+02 -4.5603925E+02
 -4.5495495E+02 -4.5387366E+02 -4.5279536E+02 -4.5172005E+02
 -4.5064772E+02 -4.4957836E+02 -4.4851195E+02 -4.4744850E+02
 -4.4638798E+02 -4.4533040E+02 -4.4427574E+02 -4.4322400E+02
 -4.4217515E+02 -4.4112920E+02 -4.4008614E+02 -4.3904595E+02
 -4.3800863E+02 -4.3697417E+02 -4.3594256E+02 -4.3491378E+02
 -4.3388784E+02 -4.3286472E+02 -4.3184442E+02 -4.3082692E+02
 -4.2981221E+02 -4.2880030E+02 -4.2779116E+02 -4.2678479E+02
 -4.2578118E+02 -4.2478032E+02 -4.2378221E+02 -4.2278683E+02
 -4.2179418E+02 -4.2080425E+02 -4.1981702E+02 -4.1883250E+02
 -4.1785067E+02 -4.1687153E+02 -4.1589506E+02 -4.1492125E+02
 -4.1395011E+02 -4.1298162E+02 -4.1201577E+02 -4.1105255E+02
 -4.1009196E+02 -4.0913399E+02 -4.0817863E+02 -4.0722587E+02
 -4.0627570E+02 -4.0532812E+02 -4.0438311E+02 -4.0344068E+02
 -4.0250081E+02 -4.0156349E+02 -4.0062871E+02 -3.9969648E+02
 -3.9876677E+02 -3.9783959E+02 -3.9691492E+02 -3.9599275E+02
 -3.9507309E+02 -3.9415591E+02 -3.9324122E+02 -3.9232900E+02
 -3.9141926E+02 -3.9051197E+02 -3.8960713E+02 -3.8870474E+02
 -3.8780479E+02 -3.8690727E+02 -3.8601217E+02 -3.8511948E+02
 -3.8422920E+02 -3.8334133E+02 -3.8245584E+02 -3.8157274E+02
 -3.8069202E+02 -3.7981367E+02 -3.7893768E+02 -3.7806405E+02
 -3.7719277E+02 -3.7632383E+02 -3.7545722E+02 -3.7459294E+02
 -3.7373099E+02 -3.7287134E+02 -3.7201400E+02 -3.7115896E+02
 -3.7030621E+02 -3.6945575E+02 -3.6860756E+02 -3.6776165E+02
 -3.6691800E+02 -3.6607660E+02 -3.6523746E+02 -3.6440056E+02
 -3.6356589E+02 -3.6273346E+02 -3.6190325E+02 -3.6107525E+02
 -3.6024947E+02 -3.5942588E+02 -3.5860449E+02 -3.5778530E+02
 -3.5696828E+02 -3.5615344E+02 -3.5534077E+02 -3.5453026E+02
 -3.5372191E+02 -3.5291570E+02 -3.5211164E+02 -3.5130972E+02
 -3.5050992E+02 -3.4971225E+02 -3.4891670E+02 -3.4812326E+02
 -3.4733192E+02 -3.4654268E+02 -3.4575553E+02 -3.4497046E+02
 -3.4418748E+02 -3.4340656E+02 -3.4262772E+02 -3.4185093E+02
 -3.4107620E+02 -3.4030351E+02 -3.3953287E+02 -3.3876426E+02
 -3.3799768E+02 -3.3723313E+02 -3.3647059E+02 -3.3571006E+02
 -3.3495153E+02 -3.3419501E+02 -3.3344048E+02 -3.3268793E+02
 -3.3193737E+02 -3.3118878E+02 -3.3044216E+02 -3.2969750E+02
 -3.2895480E+02 -3.2821405E+02 -3.2747524E+02 -3.2673838E+02
 -3.2600345E+02 -3.2527044E+02 -3.2453936E+02 -3.2381020E+02
 -3.2308294E+02 -3.2235759E+02 -3.2163414E+02 -3.2091259E+02
 -3.2019292E+02 -3.1947513E+02 -3.1875922E+02 -3.1804518E+02
 -3.1733301E+02 -3.1662269E+02 -3.1591423E+02 -3.1520762E+02
 -3.1450285E+02 -3.1379992E+02 -3.1309882E+02 -3.1239955E+02
 -3.1170210E+02 -3.1100647E+02 -3.1031265E+02 -3.0962063E+02
 -3.0893041E+02 -3.0824198E+02 -3.0755535E+02 -3.0687050E+02
 -3.0618743E+02 -3.0550613E+02 -3.0482660E+02 -3.0414883E+02
 -3.0347282E+02 -3.0279856E+02 -3.0212604E+02 -3.0145527E+02
 -3.0078624E+02 -3.0011894E+02 -2.9945337E+02 -2.9878951E+02
 -2.9812737E+02 -2.9746695E+02 -2.9680823E+02 -2.9615121E+02
 -2.9549589E+02 -2.9484226E+02 -2.9419031E+02 -2.9354005E+02
 -2.9289146E+02 -2.9224454E+02 -2.9159929E+02 -2.9095571E+02
 -2.9031377E+02 -2.8967349E+02 -2.8903486E+02 -2.8839787E+02
 -2.8776252E+02 -2.8712879E+02 -2.8649670E+02 -2.8586623E+02
 -2.8523738E+02 -2.8461014E+02 -2.8398451E+02 -2.8336048E+02
 -2.8273805E+02 -2.8211722E+02 -2.8149797E+02 -2.8088031E+02
 -2.8026424E+02 -2.7964973E+02 -2.7903680E+02 -2.7842544E+02
 -2.7781564E+02 -2.7720739E+02 -2.7660070E+02 -2.7599556E+02
 -2.7539196E+02 -2.7478990E+02 -2.7418938E+02 -2.7359038E+02
 -2.7299292E+02 -2.7239697E+02 -2.7180254E+02 -2.7120963E+02
 -2.7061822E+02 -2.7002832E+02 -2.6943991E+02 -2.6885300E+02
 -2.6826759E+02 -2.6768366E+02 -2.6710121E+02 -2.6652024E+02
 -2.6594074E+02 -2.6536271E+02 -2.6478615E+02 -2.6421105E+02
 -2.6363741E+02 -2.6306522E+02 -2.6249447E+02 -2.6192517E+02
 -2.6135731E+02 -2.6079089E+02 -2.6022590E+02 -2.5966233E+02
 -2.5910019E+02 -2.5853947E+02 -2.5798017E+02 -2.5742227E+02
 -2.5686578E+02 -2.5631070E+02 -2.5575701E+02 -2.5520472E+02
 -2.5465382E+02 -2.5410431E+02 -2.5355617E+02 -2.5300942E+02
 -2.5246405E+02 -2.5192004E+02 -2.5137740E+02 -2.5083613E+02
 -2.5029621E+02 -2.4975765E+02 -2.4922044E+02 -2.4868458E+02
 -2.4815006E+02 -2.4761688E+02 -2.4708504E+02 -2.4655453E+02
 -2.4602535E+02 -2.4549749E+02 -2.4497096E+02 -2.4444574E+02
 -2.4392183E+02 -2.4339924E+02 -2.4287795E+02 -2.4235796E+02
 -2.4183927E+02 -2.4132187E+02 -2.4080577E+02 -2.4029095E+02
 -2.3977742E+02 -2.3926516E+02 -2.3875419E+02 -2.3824448E+02
 -2.3773605E+02 -2.3722888E+02 -2.3672297E+02 -2.3621832E+02
 -2.3571492E+02 -2.3521278E+02 -2.3471188E+02 -2.3421223E+02
 -2.3371382E+02 -2.3321664E+02 -2.3272070E+02 -2.3222599E+02
 -2.3173250E+02 -2.3124024E+02 -2.3074920E+02 -2.3025937E+02
 -2.2977076E+02 -2.2928335E+02 -2.2879716E+02 -2.2831216E+02
 -2.2782836E+02 -2.2734576E+02 -2.2686435E+02 -2.2638413E+02
 -2.2590509E+02 -2.2542724E+02 -2.2495057E+02 -2.2447507E+02
 -2.2400074E+02 -2.2352758E+02 -2.2305559E+02 -2.2258476E+02
 -2.2211509E+02 -2.2164658E+02 -2.2117922E+02 -2.2071300E+02
 -2.2024794E+02 -2.1978401E+02 -2.1932123E+02 -2.1885958E+02
 -2.1839907E+02 -2.1793968E+02 -2.1748142E+02 -2.1702429E+02
 -2.1656828E+02 -2.1611338E+02 -2.1565960E+02 -2.1520693E+02
 -2.1475537E+02 -2.1430491E+02 -2.1385556E+02 -2.1340730E+02
 -2.1296014E+02 -2.1251407E+02 -2.1206910E+02 -2.1162520E+02
 -2.1118240E+02 -2.1074067E+02 -2.1030002E+02 -2.0986045E+02
 -2.0942194E+02 -2.0898451E+02 -2.0854814E+02 -2.0811283E+02
 -2.0767859E+02 -2.0724540E+02 -2.0681326E+02 -2.0638217E+02
 -2.0595214E+02 -2.0552314E+02 -2.0509519E+02 -2.0466828E+02
 -2.0424241E+02 -2.0381757E+02 -2.0339376E+02 -2.0297097E+02
 -2.0254922E+02 -2.0212848E+02 -2.0170876E+02 -2.0129006E+02
 -2.0087238E+02 -2.0045570E+02 -2.0004004E+02 -1.9962537E+02
 -1.9921171E+02 -1.9879905E+02 -1.9838739E+02 -1.9797672E+02
 -1.9756704E+02 -1.9715835E+02 -1.9675065E+02 -1.9634393E+02
 -1.9593819E+02 -1.9553343E+02 -1.9512965E+02 -1.9472683E+02
 -1.9432499E+02 -1.9392411E+02 -1.9352420E+02 -1.9312525E+02
 -1.9272726E+02 -1.9233022E+02 -1.9193414E+02 -1.9153901E+02
 -1.9114483E+02 -1.9075160E+02 -1.9035931E+02 -1.8996796E+02
 -1.8957755E+02 -1.8918807E+02 -1.8879953E+02 -1.8841191E+02
 -1.8802523E+02 -1.8763947E+02 -1.8725464E+02 -1.8687072E+02
 -1.8648772E+02 -1.8610564E+02 -1.8572447E+02 -1.8534422E+02
 -1.8496487E+02 -1.8458642E+02 -1.8420888E+02 -1.8383224E+02
 -1.8345650E+02 -1.8308165E+02 -1.8270769E+02 -1.8233463E+02
 -1.8196246E+02 -1.8159117E+02 -1.8122076E+02 -1.8085124E+02
 -1.8048259E+02 -1.8011483E+02 -1.7974793E+02 -1.7938191E+02
 -1.7901675E+02 -1.7865247E+02 -1.7828904E+02 -1.7792648E+02
 -1.7756478E+02 -1.7720394E+02 -1.7684395E+02 -1.7648482E+02
 -1.7612653E+02 -1.7576910E+02 -1.7541251E+02 -1.7505676E+02
 -1.7470186E+02 -1.7434779E+02 -1.7399456E+02 -1.7364217E+02
 -1.7329061E+02 -1.7293988E+02 -1.7258997E+02 -1.7224090E+02
 -1.7189264E+02 -1.7154521E+02 -1.7119859E+02 -1.7085280E+02
 -1.7050781E+02 -1.7016364E+02 -1.6982028E+02 -1.6947773E+02
 -1.6913598E+02 -1.6879504E+02 -1.6845490E+02 -1.6811556E+02
 -1.6777702E+02 -1.6743927E+02 -1.6710231E+02 -1.6676614E+02
 -1.6643077E+02 -1.6609618E+02 -1.6576237E+02 -1.6542935E+02
 -1.6509711E+02 -1.6476564E+02 -1.6443495E+02 -1.6410504E+02
 -1.6377590E+02 -1.6344752E+02 -1.6311992E+02 -1.6279308E+02
 -1.6246700E+02 -1.6214169E+02 -1.6181714E+02 -1.6149334E+02
 -1.6117030E+02 -1.6084801E+02 -1.6052648E+02 -1.6020569E+02
 -1.5988565E+02 -1.5956636E+02 -1.5924781E+02 -1.5893001E+02
 -1.5861294E+02 -1.5829661E+02 -1.5798102E+02 -1.5766616E+02
 -1.5735203E+02 -1.5703863E+02 -1.5672596E+02 -1.5641402E+02
 -1.5610280E+02 -1.5579230E+02 -1.5548252E+02 -1.5517346E+02
 -1.5486512E+02 -1.5455749E+02 -1.5425058E+02 -1.5394437E+02
 -1.5363888E+02 -1.5333409E+02 -1.5303000E+02 -1.5272662E+02
 -1.5242395E+02 -1.5212197E+02 -1.5182068E+02 -1.5152010E+02
 -1.5122021E+02 -1.5092101E+02 -1.5062250E+02 -1.5032468E+02
 -1.5002755E+02 -1.4973110E+02 -1.4943533E+02 -1.4914025E+02
 -1.4884585E+02 -1.4855212E+02 -1.4825907E+02 -1.4796669E+02
 -1.4767499E+02 -1.4738396E+02 -1.4709359E+02 -1.4680390E+02
 -1.4651487E+02 -1.4622650E+02 -1.4593879E+02 -1.4565175E+02
 -1.4536536E+02 -1.4507963E+02 -1.4479455E+02 -1.4451013E+02
 -1.4422636E+02 -1.4394324E+02 -1.4366077E+02 -1.4337894E+02
 -1.4309776E+02 -1.4281722E+02 -1.4253733E+02 -1.4225807E+02
 -1.4197945E+02 -1.4170147E+02 -1.4142412E+02 -1.4114741E+02
 -1.4087132E+02 -1.4059587E+02 -1.4032105E+02 -1.4004685E+02
 -1.3977328E+02 -1.3950032E+02 -1.3922800E+02 -1.3895629E+02
 -1.3868520E+02 -1.3841472E+02 -1.3814487E+02 -1.3787562E+02
 -1.3760699E+02 -1.3733897E+02 -1.3707155E+02 -1.3680475E+02
 -1.3653855E+02 -1.3627295E+02 -1.3600796E+02 -1.3574357E+02
 -1.3547977E+02 -1.3521658E+02 -1.3495398E+02 -1.3469198E+02
 -1.3443056E+02 -1.3416975E+02 -1.3390952E+02 -1.3364988E+02
 -1.3339082E+02 -1.3313236E+02 -1.3287447E+02 -1.3261717E+02
 -1.3236045E+02 -1.3210431E+02 -1.3184875E+02 -1.3159376E+02
 -1.3133935E+02 -1.3108552E+02 -1.3083225E+02 -1.3057956E+02
 -1.3032743E+02 -1.3007588E+02 -1.2982489E+02 -1.2957446E+02
 -1.2932460E+02 -1.2907530E+02 -1.2882656E+02 -1.2857838E+02
 -1.2833075E+02 -1.2808369E+02 -1.2783718E+02 -1.2759122E+02
 -1.2734581E+02 -1.2710095E+02 -1.2685665E+02 -1.2661289E+02
 -1.2636967E+02 -1.2612700E+02 -1.2588488E+02 -1.2564330E+02
 -1.2540225E+02 -1.2516175E+02 -1.2492179E+02 -1.2468236E+02
 -1.2444346E+02 -1.2420511E+02 -1.2396728E+02 -1.2372998E+02
 -1.2349322E+02 -1.2325698E+02 -1.2302127E+02 -1.2278608E+02
 -1.2255142E+02 -1.2231729E+02 -1.2208367E+02 -1.2185058E+02
 -1.2161800E+02 -1.2138594E+02 -1.2115440E+02 -1.2092337E+02
 -1.2069286E+02 -1.2046286E+02 -1.2023337E+02 -1.2000439E+02
 -1.1977592E+02 -1.1954795E+02 -1.1932050E+02 -1.1909354E+02
 -1.1886709E+02 -1.1864115E+02 -1.1841570E+02 -1.1819075E+02
 -1.1796631E+02 -1.1774236E+02 -1.1751890E+02 -1.1729594E+02
 -1.1707347E+02 -1.1685150E+02 -1.1663001E+02 -1.1640902E+02
 -1.1618851E+02 -1.1596849E+02 -1.1574896E+02 -1.1552991E+02
 -1.1531134E+02 -1.1509326E+02 -1.1487566E+02 -1.1465854E+02
 -1.1444189E+02 -1.1422573E+02 -1.1401004E+02 -1.1379482E+02
 -1.1358008E+02 -1.1336582E+02 -1.1315202E+02 -1.1293869E+02
 -1.1272583E+02 -1.1251344E+02 -1.1230152E+02 -1.1209006E+02
 -1.1187907E+02 -1.1166854E+02 -1.1145847E+02 -1.1124887E+02
 -1.1103972E+02 -1.1083103E+02 -1.1062280E+02 -1.1041503E+02
 -1.1020771E+02 -1.1000084E+02 -1.0979443E+02 -1.0958847E+02
 -1.0938296E+02 -1.0917789E+02 -1.0897328E+02 -1.0876912E+02
 -1.0856540E+02 -1.0836212E+02 -1.0815929E+02 -1.0795691E+02
 -1.0775496E+02 -1.0755345E+02 -1.0735239E+02 -1.0715176E+02
 -1.0695157E+02 -1.0675182E+02 -1.0655250E+02 -1.0635361E+02
 -1.0615516E+02 -1.0595714E+02 -1.0575955E+02 -1.0556239E+02
 -1.0536566E+02 -1.0516936E+02 -1.0497348E+02 -1.0477803E+02
 -1.0458301E+02 -1.0438840E+02 -1.0419422E+02 -1.0400046E+02
 -1.0380712E+02 -1.0361420E+02 -1.0342170E+02 -1.0322962E+02
 -1.0303795E+02 -1.0284669E+02 -1.0265585E+02 -1.0246543E+02
 -1.0227541E+02 -1.0208581E+02 -1.0189662E+02 -1.0170783E+02
 -1.0151945E+02 -1.0133148E+02 -1.0114392E+02 -1.0095676E+02
 -1.0077001E+02 -1.0058365E+02 -1.0039770E+02 -1.0021215E+02
 -1.0002700E+02 -9.9842255E+01 -9.9657902E+01 -9.9473947E+01
 -9.9290387E+01 -9.9107223E+01 -9.8924452E+01 -9.8742075E+01
 -9.8560090E+01 -9.8378496E+01 -9.8197293E+01 -9.8016478E+01
 -9.7836052E+01 -9.7656014E+01 -9.7476361E+01 -9.7297095E+01
 -9.7118212E+01 -9.6939714E+01 -9.6761597E+01 -9.6583863E+01
 -9.6406509E+01 -9.6229536E+01 -9.6052941E+01 -9.5876724E+01
 -9.5700884E+01 -9.5525420E+01 -9.5350332E+01 -9.5175617E+01
 -9.5001276E+01 -9.4827308E+01 -9.4653711E+01 -9.4480485E+01
 -9.4307628E+01 -9.4135141E+01 -9.3963021E+01 -9.3791269E+01
 -9.3619882E+01 -9.3448861E+01 -9.3278204E+01 -9.3107911E+01
 -9.2937980E+01 -9.2768411E+01 -9.2599203E+01 -9.2430355E+01
 -9.2261865E+01 -9.2093734E+01 -9.1925961E+01 -9.1758544E+01
 -9.1591482E+01 -9.1424776E+01 -9.1258423E+01 -9.1092423E+01
 -9.0926775E+01 -9.0761479E+01 -9.0596533E+01 -9.0431937E+01
 -9.0267689E+01 -9.0103790E+01 -8.9940237E+01 -8.9777031E+01
 -8.9614170E+01 -8.9451654E+01 -8.9289482E+01 -8.9127652E+01
 -8.8966165E+01 -8.8805019E+01 -8.8644213E+01 -8.8483747E+01
 -8.8323619E+01 -8.8163830E+01 -8.8004378E+01 -8.7845262E+01
 -8.7686481E+01 -8.7528036E+01 -8.7369924E+01 -8.7212145E+01
 -8.7054699E+01 -8.6897584E+01 -8.6740800E+01 -8.6584346E+01
 -8.6428221E+01 -8.6272424E+01 -8.6116955E+01 -8.5961813E+01
 -8.5806997E+01 -8.5652505E+01 -8.5498339E+01 -8.5344496E+01
 -8.5190975E+01 -8.5037777E+01 -8.4884900E+01 -8.4732344E+01
 -8.4580107E+01 -8.4428190E+01 -8.4276591E+01 -8.4125309E+01
 -8.3974344E+01 -8.3823695E+01 -8.3673361E+01 -8.3523341E+01
 -8.3373636E+01 -8.3224243E+01 -8.3075162E+01 -8.2926393E+01
 -8.2777935E+01 -8.2629786E+01 -8.2481947E+01 -8.2334417E+01
 -8.2187194E+01 -8.2040278E+01 -8.1893668E+01 -8.1747364E+01
 -8.1601365E+01 -8.1455670E+01 -8.1310279E+01 -8.1165190E+01
 -8.1020403E+01 -8.0875917E+01 -8.0731732E+01 -8.0587846E+01
 -8.0444260E+01 -8.0300972E+01 -8.0157982E+01 -8.0015288E+01
 -7.9872891E+01 -7.9730790E+01 -7.9588983E+01 -7.9447471E+01
 -7.9306252E+01 -7.9165326E+01 -7.9024691E+01 -7.8884349E+01
 -7.8744297E+01 -7.8604535E+01 -7.8465062E+01 -7.8325878E+01
 -7.8186982E+01 -7.8048373E+01 -7.7910050E+01 -7.7772014E+01
 -7.7634263E+01 -7.7496796E+01 -7.7359614E+01 -7.7222714E+01
 -7.7086097E+01 -7.6949762E+01 -7.6813709E+01 -7.6677935E+01
 -7.6542442E+01 -7.6407228E+01 -7.6272293E+01 -7.6137635E+01
 -7.6003255E+01 -7.5869151E+01 -7.5735323E+01 -7.5601771E+01
 -7.5468493E+01 -7.5335490E+01 -7.5202760E+01 -7.5070302E+01
 -7.4938117E+01 -7.4806203E+01 -7.4674560E+01 -7.4543187E+01
 -7.4412083E+01 -7.4281249E+01 -7.4150683E+01 -7.4020385E+01
 -7.3890353E+01 -7.3760588E+01 -7.3631089E+01 -7.3501855E+01
 -7.3372886E+01 -7.3244180E+01 -7.3115738E+01 -7.2987558E+01
 -7.2859641E+01 -7.2731985E+01 -7.2604590E+01 -7.2477455E+01
 -7.2350580E+01 -7.2223964E+01 -7.2097606E+01 -7.1971506E+01
 -7.1845664E+01 -7.1720078E+01 -7.1594748E+01 -7.1469673E+01
 -7.1344854E+01 -7.1220288E+01 -7.1095977E+01 -7.0971918E+01
 -7.0848112E+01 -7.0724557E+01 -7.0601254E+01 -7.0478202E+01
 -7.0355400E+01 -7.0232847E+01 -7.0110544E+01 -6.9988489E+01
 -6.9866681E+01 -6.9745121E+01 -6.9623808E+01 -6.9502740E+01
 -6.9381919E+01 -6.9261342E+01 -6.9141010E+01 -6.9020921E+01
 -6.8901076E+01 -6.8781473E+01 -6.8662113E+01 -6.8542994E+01
 -6.8424116E+01 -6.8305479E+01 -6.8187081E+01 -6.8068923E+01
 -6.7951004E+01 -6.7833323E+01 -6.7715879E+01 -6.7598673E+01
 -6.7481704E+01 -6.7364970E+01 -6.7248472E+01 -6.7132209E+01
 -6.7016181E+01 -6.6900386E+01 -6.6784825E+01 -6.6669496E+01
 -6.6554400E+01 -6.6439535E+01 -6.6324902E+01 -6.6210500E+01
 -6.6096327E+01 -6.5982384E+01 -6.5868671E+01 -6.5755186E+01
 -6.5641929E+01 -6.5528899E+01 -6.5416096E+01 -6.5303520E+01
 -6.5191170E+01 -6.5079046E+01 -6.4967146E+01 -6.4855471E+01
 -6.4744019E+01 -6.4632791E+01 -6.4521786E+01 -6.4411003E+01
 -6.4300442E+01 -6.4190102E+01 -6.4079984E+01 -6.3970085E+01
 -6.3860406E+01 -6.3750947E+01 -6.3641707E+01 -6.3532684E+01
 -6.3423880E+01 -6.3315293E+01 -6.3206923E+01 -6.3098769E+01
 -6.2990831E+01 -6.2883108E+01 -6.2775601E+01 -6.2668307E+01
 -6.2561228E+01 -6.2454362E+01 -6.2347708E+01 -6.2241268E+01
 -6.2135039E+01 -6.2029021E+01 -6.1923215E+01 -6.1817619E+01
 -6.1712233E+01 -6.1607057E+01 -6.1502090E+01 -6.1397331E+01
 -6.1292780E+01 -6.1188437E+01 -6.1084302E+01 -6.0980373E+01
 -6.0876650E+01 -6.0773133E+01 -6.0669821E+01 -6.0566714E+01
 -6.0463812E+01 -6.0361113E+01 -6.0258618E+01 -6.0156326E+01
 -6.0054236E+01 -5.9952349E+01 -5.9850663E+01 -5.9749178E+01
 -5.9647894E+01 -5.9546810E+01 -5.9445926E+01 -5.9345241E+01
 -5.9244756E+01 -5.9144468E+01 -5.9044379E+01 -5.8944487E+01
 -5.8844792E+01 -5.8745294E+01 -5.8645993E+01 -5.8546887E+01
 -5.8447976E+01 -5.8349260E+01 -5.8250739E+01 -5.8152412E+01
 -5.8054278E+01 -5.7956337E+01 -5.7858589E+01 -5.7761034E+01
 -5.7663670E+01 -5.7566498E+01 -5.7469517E+01 -5.7372726E+01
 -5.7276125E+01 -5.7179714E+01 -5.7083493E+01 -5.6987460E+01
 -5.6891616E+01 -5.6795959E+01 -5.6700491E+01 -5.6605209E+01
 -5.6510114E+01 -5.6415206E+01 -5.6320483E+01 -5.6225946E+01
 -5.6131594E+01 -5.6037427E+01 -5.5943444E+01 -5.5849644E+01
 -5.5756028E+01 -5.5662596E+01 -5.5569346E+01 -5.5476278E+01
 -5.5383391E+01 -5.5290687E+01 -5.5198163E+01 -5.5105820E+01
 -5.5013657E+01 -5.4921673E+01 -5.4829869E+01 -5.4738245E+01
 -5.4646798E+01 -5.4555530E+01 -5.4464440E+01 -5.4373527E+01
 -5.4282791E+01 -5.4192232E+01 -5.4101848E+01 -5.4011641E+01
 -5.3921609E+01 -5.3831752E+01 -5.3742070E+01 -5.3652562E+01
 -5.3563228E+01 -5.3474068E+01 -5.3385080E+01 -5.3296265E+01
 -5.3207623E+01 -5.3119153E+01 -5.3030854E+01 -5.2942726E+01
 -5.2854769E+01 -5.2766983E+01 -5.2679366E+01 -5.2591920E+01
 -5.2504642E+01 -5.2417534E+01 -5.2330594E+01 -5.2243822E+01
 -5.2157218E+01 -5.2070782E+01 -5.1984512E+01 -5.1898410E+01
 -5.1812473E+01 -5.1726703E+01 -5.1641098E+01 -5.1555658E+01
 -5.1470384E+01 -5.1385274E+01 -5.1300328E+01 -5.1215545E+01
 -5.1130927E+01 -5.1046471E+01 -5.0962178E+01 -5.0878047E+01
 -5.0794078E+01 -5.0710271E+01 -5.0626626E+01 -5.0543141E+01
 -5.0459816E+01 -5.0376652E+01 -5.0293648E+01 -5.0210803E+01
 -5.0128118E+01 -5.0045591E+01 -4.9963223E+01 -4.9881013E+01
 -4.9798960E+01 -4.9717065E+01 -4.9635328E+01 -4.9553746E+01
 -4.9472322E+01 -4.9391053E+01 -4.9309940E+01 -4.9228982E+01
 -4.9148180E+01 -4.9067532E+01 -4.8987038E+01 -4.8906699E+01
 -4.8826513E+01 -4.8746481E+01 -4.8666601E+01 -4.8586874E+01
 -4.8507300E+01 -4.8427877E+01 -4.8348606E+01 -4.8269487E+01
 -4.8190518E+01 -4.8111701E+01 -4.8033033E+01 -4.7954516E+01
 -4.7876148E+01 -4.7797930E+01 -4.7719860E+01 -4.7641940E+01
 -4.7564168E+01 -4.7486544E+01 -4.7409067E+01 -4.7331738E+01
 -4.7254557E+01 -4.7177522E+01 -4.7100633E+01 -4.7023891E+01
 -4.6947294E+01 -4.6870843E+01 -4.6794537E+01 -4.6718377E+01
 -4.6642360E+01 -4.6566488E+01 -4.6490760E+01 -4.6415176E+01
 -4.6339734E+01 -4.6264436E+01 -4.6189281E+01 -4.6114268E+01
 -4.6039397E+01 -4.5964668E+01 -4.5890080E+01 -4.5815634E+01
 -4.5741328E+01 -4.5667163E+01 -4.5593138E+01 -4.5519253E+01
 -4.5445508E+01 -4.5371902E+01 -4.5298435E+01 -4.5225107E+01
 -4.5151917E+01 -4.5078866E+01 -4.5005952E+01 -4.4933176E+01
 -4.4860537E+01 -4.4788036E+01 -4.4715670E+01 -4.4643442E+01
 -4.4571349E+01 -4.4499392E+01 -4.4427570E+01 -4.4355884E+01
 -4.4284333E+01 -4.4212916E+01 -4.4141634E+01 -4.4070485E+01
 -4.3999471E+01 -4.3928590E+01 -4.3857842E+01 -4.3787227E+01
 -4.3716744E+01 -4.3646394E+01 -4.3576176E+01 -4.3506090E+01
 -4.3436135E+01 -4.3366311E+01 -4.3296618E+01 -4.3227056E+01
 -4.3157625E+01 -4.3088323E+01 -4.3019151E+01 -4.2950109E+01
 -4.2881196E+01 -4.2812411E+01 -4.2743756E+01 -4.2675229E+01
 -4.2606830E+01 -4.2538559E+01 -4.2470415E+01 -4.2402399E+01
 -4.2334510E+01 -4.2266748E+01 -4.2199112E+01 -4.2131603E+01
 -4.2064219E+01 -4.1996961E+01 -4.1929829E+01 -4.1862821E+01
 -4.1795939E+01 -4.1729181E+01 -4.1662548E+01 -4.1596038E+01
 -4.1529653E+01 -4.1463391E+01 -4.1397252E+01 -4.1331237E+01
 -4.1265344E+01 -4.1199574E+01 -4.1133926E+01 -4.1068400E+01
 -4.1002996E+01 -4.0937713E+01 -4.0872552E+01 -4.0807511E+01
 -4.0742591E+01 -4.0677792E+01 -4.0613113E+01 -4.0548554E+01
 -4.0484114E+01 -4.0419794E+01 -4.0355593E+01 -4.0291511E+01
 -4.0227548E+01 -4.0163703E+01 -4.0099977E+01 -4.0036368E+01
 -3.9972877E+01 -3.9909504E+01 -3.9846247E+01 -3.9783108E+01
 -3.9720085E+01 -3.9657179E+01 -3.9594389E+01 -3.9531714E+01
 -3.9469156E+01 -3.9406713E+01 -3.9344385E+01 -3.9282173E+01
 -3.9220075E+01 -3.9158091E+01 -3.9096222E+01 -3.9034467E+01
 -3.8972825E+01 -3.8911297E+01 -3.8849883E+01 -3.8788581E+01
 -3.8727392E+01 -3.8666316E+01 -3.8605352E+01 -3.8544501E+01
 -3.8483761E+01 -3.8423132E+01 -3.8362616E+01 -3.8302210E+01
 -3.8241915E+01 -3.8181731E+01 -3.8121658E+01 -3.8061695E+01
 -3.8001841E+01 -3.7942098E+01 -3.7882464E+01 -3.7822939E+01
 -3.7763524E+01 -3.7704217E+01 -3.7645019E+01 -3.7585929E+01
 -3.7526948E+01 -3.7468075E+01 -3.7409309E+01 -3.7350651E+01
 -3.7292100E+01 -3.7233656E+01 -3.7175319E+01 -3.7117088E+01
 -3.7058964E+01 -3.7000946E+01 -3.6943034E+01 -3.6885228E+01
 -3.6827527E+01 -3.6769932E+01 -3.6712441E+01 -3.6655055E+01
 -3.6597775E+01 -3.6540598E+01 -3.6483526E+01 -3.6426557E+01
 -3.6369692E+01 -3.6312931E+01 -3.6256274E+01 -3.6199719E+01
 -3.6143267E+01 -3.6086918E+01 -3.6030671E+01 -3.5974527E+01
 -3.5918485E+01 -3.5862544E+01 -3.5806705E+01 -3.5750968E+01
 -3.5695331E+01 -3.5639796E+01 -3.5584362E+01 -3.5529028E+01
 -3.5473794E+01 -3.5418660E+01 -3.5363627E+01 -3.5308693E+01
 -3.5253859E+01 -3.5199124E+01 -3.5144488E+01 -3.5089951E+01
 -3.5035513E+01 -3.4981173E+01 -3.4926932E+01 -3.4872789E+01
 -3.4818743E+01 -3.4764796E+01 -3.4710946E+01 -3.4657193E+01
 -3.4603537E+01 -3.4549978E+01 -3.4496516E+01 -3.4443150E+01
 -3.4389880E+01 -3.4336707E+01 -3.4283630E+01 -3.4230648E+01
 -3.4177762E+01 -3.4124971E+01 -3.4072275E+01 -3.4019674E+01
 -3.3967168E+01 -3.3914756E+01 -3.3862438E+01 -3.3810215E+01
 -3.3758086E+01 -3.3706050E+01 -3.3654108E+01 -3.3602260E+01
 -3.3550504E+01 -3.3498842E+01 -3.3447272E+01 -3.3395795E+01
 -3.3344410E+01 -3.3293117E+01 -3.3241917E+01 -3.3190808E+01
 -3.3139791E+01 -3.3088866E+01 -3.3038032E+01 -3.2987288E+01
 -3.2936636E+01 -3.2886075E+01 -3.2835604E+01 -3.2785223E+01
 -3.2734932E+01 -3.2684732E+01 -3.2634621E+01 -3.2584600E+01
 -3.2534668E+01 -3.2484826E+01 -3.2435073E+01 -3.2385408E+01
 -3.2335832E+01 -3.2286345E+01 -3.2236946E+01 -3.2187635E+01
 -3.2138412E+01 -3.2089277E+01 -3.2040230E+01 -3.1991270E+01
 -3.1942397E+01 -3.1893612E+01 -3.1844913E+01 -3.1796301E+01
 -3.1747775E+01 -3.1699336E+01 -3.1650983E+01 -3.1602717E+01
 -3.1554536E+01 -3.1506440E+01 -3.1458431E+01 -3.1410506E+01
 -3.1362667E+01 -3.1314912E+01 -3.1267243E+01 -3.1219658E+01
 -3.1172158E+01 -3.1124741E+01 -3.1077409E+01 -3.1030161E+01
 -3.0982997E+01 -3.0935916E+01 -3.0888919E+01 -3.0842005E+01
 -3.0795175E+01 -3.0748427E+01 -3.0701762E+01 -3.0655179E+01
 -3.0608679E+01 -3.0562261E+01 -3.0515925E+01 -3.0469672E+01
 -3.0423500E+01 -3.0377409E+01 -3.0331400E+01 -3.0285473E+01
 -3.0239626E+01 -3.0193861E+01 -3.0148176E+01 -3.0102572E+01
 -3.0057048E+01 -3.0011604E+01 -2.9966241E+01 -2.9920958E+01
 -2.9875754E+01 -2.9830630E+01 -2.9785586E+01 -2.9740621E+01
 -2.9695735E+01 -2.9650928E+01 -2.9606200E+01 -2.9561551E+01
 -2.9516980E+01 -2.9472488E+01 -2.9428074E+01 -2.9383738E+01
 -2.9339480E+01 -2.9295299E+01 -2.9251196E+01 -2.9207171E+01
 -2.9163223E+01 -2.9119352E+01 -2.9075558E+01 -2.9031841E+01
 -2.8988200E+01 -2.8944636E+01 -2.8901149E+01 -2.8857737E+01
 -2.8814402E+01 -2.8771143E+01 -2.8727959E+01 -2.8684851E+01
 -2.8641818E+01 -2.8598861E+01 -2.8555979E+01 -2.8513171E+01
 -2.8470439E+01 -2.8427781E+01 -2.8385198E+01 -2.8342690E+01
 -2.8300255E+01 -2.8257895E+01 -2.8215608E+01 -2.8173396E+01
 -2.8131257E+01 -2.8089191E+01 -2.8047199E+01 -2.8005280E+01
 -2.7963435E+01 -2.7921662E+01 -2.7879962E+01 -2.7838334E+01
 -2.7796779E+01 -2.7755297E+01 -2.7713887E+01 -2.7672548E+01
 -2.7631282E+01 -2.7590087E+01 -2.7548964E+01 -2.7507913E+01
 -2.7466933E+01 -2.7426024E+01 -2.7385186E+01 -2.7344419E+01
 -2.7303723E+01 -2.7263097E+01 -2.7222542E+01 -2.7182058E+01
 -2.7141643E+01 -2.7101299E+01 -2.7061025E+01 -2.7020820E+01
 -2.6980685E+01 -2.6940620E+01 -2.6900624E+01 -2.6860697E+01
 -2.6820840E+01 -2.6781051E+01 -2.6741331E+01 -2.6701680E+01
 -2.6662098E+01 -2.6622584E+01 -2.6583138E+01 -2.6543760E+01
 -2.6504451E+01 -2.6465209E+01 -2.6426035E+01 -2.6386929E+01
 -2.6347890E+01 -2.6308919E+01 -2.6270015E+01 -2.6231178E+01
 -2.6192408E+01 -2.6153705E+01 -2.6115068E+01 -2.6076498E+01
 -2.6037995E+01 -2.5999558E+01 -2.5961187E+01 -2.5922882E+01
 -2.5884643E+01 -2.5846469E+01 -2.5808362E+01 -2.5770320E+01
 -2.5732343E+01 -2.5694432E+01 -2.5656585E+01 -2.5618804E+01
 -2.5581088E+01 -2.5543436E+01 -2.5505850E+01 -2.5468327E+01
 -2.5430869E+01 -2.5393475E+01 -2.5356146E+01 -2.5318880E+01
 -2.5281678E+01 -2.5244540E+01 -2.5207466E+01 -2.5170455E+01
 -2.5133508E+01 -2.5096624E+01 -2.5059803E+01 -2.5023045E+01
 -2.4986349E+01 -2.4949717E+01 -2.4913147E+01 -2.4876640E+01
 -2.4840195E+01 -2.4803813E+01 -2.4767492E+01 -2.4731234E+01
 -2.4695037E+01 -2.4658903E+01 -2.4622830E+01 -2.4586818E+01
 -2.4550868E+01 -2.4514980E+01 -2.4479152E+01 -2.4443386E+01
 -2.4407680E+01 -2.4372035E+01 -2.4336452E+01 -2.4300928E+01
 -2.4265465E+01 -2.4230063E+01 -2.4194721E+01 -2.4159438E+01
 -2.4124216E+01 -2.4089054E+01 -2.4053952E+01 -2.4018909E+01
 -2.3983926E+01 -2.3949002E+01 -2.3914137E+01 -2.3879332E+01
 -2.3844586E+01 -2.3809899E+01 -2.3775270E+01 -2.3740701E+01
 -2.3706190E+01 -2.3671737E+01 -2.3637343E+01 -2.3603007E+01
 -2.3568730E+01 -2.3534510E+01 -2.3500348E+01 -2.3466245E+01
 -2.3432199E+01 -2.3398210E+01 -2.3364279E+01 -2.3330406E+01
 -2.3296589E+01 -2.3262830E+01 -2.3229128E+01 -2.3195483E+01
 -2.3161895E+01 -2.3128364E+01 -2.3094889E+01 -2.3061470E+01
 -2.3028108E+01 -2.2994803E+01 -2.2961553E+01 -2.2928360E+01
 -2.2895222E+01 -2.2862141E+01 -2.2829115E+01 -2.2796145E+01
 -2.2763230E+01 -2.2730371E+01 -2.2697567E+01 -2.2664818E+01
 -2.2632125E+01 -2.2599486E+01 -2.2566902E+01 -2.2534373E+01
 -2.2501899E+01 -2.2469480E+01 -2.2437115E+01 -2.2404804E+01
 -2.2372547E+01 -2.2340345E+01 -2.2308197E+01 -2.2276103E+01
 -2.2244062E+01 -2.2212076E+01 -2.2180143E+01 -2.2148263E+01
 -2.2116437E+01 -2.2084664E+01 -2.2052945E+01 -2.2021279E+01
 -2.1989665E+01 -2.1958105E+01 -2.1926598E+01 -2.1895143E+01
 -2.1863741E+01 -2.1832391E+01 -2.1801094E+01 -2.1769849E+01
 -2.1738656E+01 -2.1707516E+01 -2.1676427E+01 -2.1645391E+01
 -2.1614406E+01 -2.1583473E+01 -2.1552592E+01 -2.1521762E+01
 -2.1490984E+01 -2.1460257E+01 -2.1429581E+01 -2.1398956E+01
 -2.1368383E+01 -2.1337860E+01 -2.1307388E+01 -2.1276967E+01
 -2.1246597E+01 -2.1216277E+01 -2.1186008E+01 -2.1155789E+01
 -2.1125620E+01 -2.1095502E+01 -2.1065433E+01 -2.1035415E+01
 -2.1005447E+01 -2.0975528E+01 -2.0945659E+01 -2.0915839E+01
 -2.0886069E+01 -2.0856349E+01 -2.0826678E+01 -2.0797056E+01
 -2.0767483E+01 -2.0737959E+01 -2.0708485E+01 -2.0679059E+01
 -2.0649682E+01 -2.0620353E+01 -2.0591073E+01 -2.0561842E+01
 -2.0532659E+01 -2.0503524E+01 -2.0474438E+01 -2.0445399E+01
 -2.0416409E+01 -2.0387467E+01 -2.0358572E+01 -2.0329726E+01
 -2.0300927E+01 -2.0272175E+01 -2.0243471E+01 -2.0214815E+01
 -2.0186205E+01 -2.0157643E+01 -2.0129129E+01 -2.0100661E+01
 -2.0072240E+01 -2.0043866E+01 -2.0015539E+01 -1.9987258E+01
 -1.9959024E+01 -1.9930837E+01 -1.9902696E+01 -1.9874601E+01
 -1.9846553E+01 -1.9818551E+01 -1.9790595E+01 -1.9762684E+01
 -1.9734820E+01 -1.9707002E+01 -1.9679229E+01 -1.9651502E+01
 -1.9623821E+01 -1.9596185E+01 -1.9568594E+01 -1.9541049E+01
 -1.9513549E+01 -1.9486094E+01 -1.9458684E+01 -1.9431320E+01
 -1.9404000E+01 -1.9376725E+01 -1.9349494E+01 -1.9322308E+01
 -1.9295167E+01 -1.9268070E+01 -1.9241018E+01 -1.9214010E+01
 -1.9187046E+01 -1.9160126E+01 -1.9133251E+01 -1.9106419E+01
 -1.9079631E+01 -1.9052887E+01 -1.9026187E+01 -1.8999530E+01
 -1.8972917E+01 -1.8946347E+01 -1.8919821E+01 -1.8893338E+01
 -1.8866899E+01 -1.8840502E+01 -1.8814149E+01 -1.8787838E+01
 -1.8761571E+01 -1.8735346E+01 -1.8709164E+01 -1.8683025E+01
 -1.8656928E+01 -1.8630874E+01 -1.8604862E+01 -1.8578893E+01
 -1.8552966E+01 -1.8527081E+01 -1.8501238E+01 -1.8475438E+01
 -1.8449679E+01 -1.8423962E+01 -1.8398287E+01 -1.8372654E+01
 -1.8347062E+01 -1.8321512E+01 -1.8296004E+01 -1.8270537E+01
 -1.8245111E+01 -1.8219726E+01 -1.8194383E+01 -1.8169081E+01
 -1.8143820E+01 -1.8118600E+01 -1.8093420E+01 -1.8068282E+01
 -1.8043184E+01 -1.8018127E+01 -1.7993111E+01 -1.7968135E+01
 -1.7943199E+01 -1.7918304E+01 -1.7893449E+01 -1.7868634E+01
 -1.7843860E+01 -1.7819125E+01 -1.7794431E+01 -1.7769776E+01
 -1.7745162E+01 -1.7720587E+01 -1.7696051E+01 -1.7671556E+01
 -1.7647100E+01 -1.7622683E+01 -1.7598306E+01 -1.7573968E+01
 -1.7549669E+01 -1.7525410E+01 -1.7501190E+01 -1.7477008E+01
 -1.7452866E+01 -1.7428763E+01 -1.7404698E+01 -1.7380672E+01
 -1.7356685E+01 -1.7332737E+01 -1.7308827E+01 -1.7284955E+01
 -1.7261122E+01 -1.7237327E+01 -1.7213571E+01 -1.7189853E+01
 -1.7166172E+01 -1.7142530E+01 -1.7118926E+01 -1.7095360E+01
 -1.7071831E+01 -1.7048341E+01 -1.7024888E+01 -1.7001472E+01
 -1.6978095E+01 -1.6954754E+01 -1.6931452E+01 -1.6908186E+01
 -1.6884958E+01 -1.6861767E+01 -1.6838613E+01 -1.6815496E+01
 -1.6792417E+01 -1.6769374E+01 -1.6746368E+01 -1.6723399E+01
 -1.6700467E+01 -1.6677571E+01 -1.6654712E+01 -1.6631890E+01
 -1.6609104E+01 -1.6586354E+01 -1.6563641E+01 -1.6540964E+01
 -1.6518323E+01 -1.6495718E+01 -1.6473150E+01 -1.6450617E+01
 -1.6428121E+01 -1.6405660E+01 -1.6383235E+01 -1.6360846E+01
 -1.6338493E+01 -1.6316175E+01 -1.6293893E+01 -1.6271646E+01
 -1.6249435E+01 -1.6227259E+01 -1.6205118E+01 -1.6183012E+01
 -1.6160942E+01 -1.6138907E+01 -1.6116907E+01 -1.6094942E+01
 -1.6073012E+01 -1.6051116E+01 -1.6029256E+01 -1.6007430E+01
 -1.5985639E+01 -1.5963882E+01 -1.5942160E+01 -1.5920473E+01
 -1.5898820E+01 -1.5877201E+01 -1.5855616E+01 -1.5834066E+01
 -1.5812550E+01 -1.5791068E+01 -1.5769620E+01 -1.5748206E+01
 -1.5726826E+01 -1.5705480E+01 -1.5684167E+01 -1.5662888E+01
 -1.5641643E+01 -1.5620432E+01 -1.5599254E+01 -1.5578110E+01
 -1.5556999E+01 -1.5535921E+01 -1.5514877E+01 -1.5493866E+01
 -1.5472888E+01 -1.5451944E+01 -1.5431032E+01 -1.5410153E+01
 -1.5389308E+01 -1.5368495E+01 -1.5347715E+01 -1.5326968E+01
 -1.5306253E+01 -1.5285572E+01 -1.5264922E+01 -1.5244306E+01
 -1.5223722E+01 -1.5203170E+01 -1.5182650E+01 -1.5162163E+01
 -1.5141708E+01 -1.5121286E+01 -1.5100895E+01 -1.5080537E+01
 -1.5060210E+01 -1.5039916E+01 -1.5019653E+01 -1.4999422E+01
 -1.4979224E+01 -1.4959056E+01 -1.4938921E+01 -1.4918817E+01
 -1.4898744E+01 -1.4878703E+01 -1.4858694E+01 -1.4838716E+01
 -1.4818769E+01 -1.4798854E+01 -1.4778969E+01 -1.4759116E+01
 -1.4739294E+01 -1.4719503E+01 -1.4699744E+01 -1.4680015E+01
 -1.4660316E+01 -1.4640649E+01 -1.4621013E+01 -1.4601407E+01
 -1.4581832E+01 -1.4562287E+01 -1.4542773E+01 -1.4523290E+01
 -1.4503837E+01 -1.4484414E+01 -1.4465022E+01 -1.4445660E+01
 -1.4426328E+01 -1.4407027E+01 -1.4387755E+01 -1.4368514E+01
 -1.4349302E+01 -1.4330121E+01 -1.4310969E+01 -1.4291848E+01
 -1.4272756E+01 -1.4253694E+01 -1.4234661E+01 -1.4215659E+01
 -1.4196685E+01 -1.4177742E+01 -1.4158828E+01 -1.4139943E+01
 -1.4121088E+01 -1.4102262E+01 -1.4083465E+01 -1.4064697E+01
 -1.4045959E+01 -1.4027250E+01 -1.4008570E+01 -1.3989918E+01
 -1.3971296E+01 -1.3952703E+01 -1.3934139E+01 -1.3915603E+01
 -1.3897096E+01 -1.3878618E+01 -1.3860168E+01 -1.3841748E+01
 -1.3823355E+01 -1.3804992E+01 -1.3786656E+01 -1.3768349E+01
 -1.3750071E+01 -1.3731820E+01 -1.3713598E+01 -1.3695404E+01
 -1.3677239E+01 -1.3659101E+01 -1.3640992E+01 -1.3622910E+01
 -1.3604857E+01 -1.3586831E+01 -1.3568833E+01 -1.3550863E+01
 -1.3532921E+01 -1.3515007E+01 -1.3497120E+01 -1.3479260E+01
 -1.3461429E+01 -1.3443625E+01 -1.3425848E+01 -1.3408099E+01
 -1.3390377E+01 -1.3372682E+01 -1.3355015E+01 -1.3337375E+01
 -1.3319762E+01 -1.3302176E+01 -1.3284617E+01 -1.3267086E+01
 -1.3249581E+01 -1.3232103E+01 -1.3214652E+01 -1.3197228E+01
 -1.3179831E+01 -1.3162461E+01 -1.3145117E+01 -1.3127800E+01
 -1.3110510E+01 -1.3093246E+01 -1.3076008E+01 -1.3058797E+01
 -1.3041613E+01 -1.3024455E+01 -1.3007323E+01 -1.2990217E+01
 -1.2973138E+01 -1.2956085E+01 -1.2939058E+01 -1.2922057E+01
 -1.2905082E+01 -1.2888134E+01 -1.2871211E+01 -1.2854314E+01
 -1.2837443E+01 -1.2820598E+01 -1.2803778E+01 -1.2786985E+01
 -1.2770217E+01 -1.2753474E+01 -1.2736758E+01 -1.2720066E+01
 -1.2703401E+01 -1.2686761E+01 -1.2670146E+01 -1.2653556E+01
 -1.2636992E+01 -1.2620454E+01 -1.2603940E+01 -1.2587452E+01
 -1.2570989E+01 -1.2554551E+01 -1.2538138E+01 -1.2521750E+01
 -1.2505387E+01 -1.2489049E+01 -1.2472736E+01 -1.2456447E+01
 -1.2440184E+01 -1.2423945E+01 -1.2407731E+01 -1.2391542E+01
 -1.2375377E+01 -1.2359237E+01 -1.2343122E+01 -1.2327031E+01
 -1.2310964E+01 -1.2294922E+01 -1.2278905E+01 -1.2262911E+01
 -1.2246942E+01 -1.2230997E+01 -1.2215077E+01 -1.2199180E+01
 -1.2183308E+01 -1.2167460E+01 -1.2151636E+01 -1.2135835E+01
 -1.2120059E+01 -1.2104307E+01 -1.2088579E+01 -1.2072874E+01
 -1.2057193E+01 -1.2041536E+01 -1.2025903E+01 -1.2010293E+01
 -1.1994707E+01 -1.1979145E+01 -1.1963606E+01 -1.1948091E+01
 -1.1932599E+01 -1.1917131E+01 -1.1901686E+01 -1.1886264E+01
 -1.1870866E+01 -1.1855490E+01 -1.1840139E+01 -1.1824810E+01
 -1.1809504E+01 -1.1794222E+01 -1.1778963E+01 -1.1763726E+01
 -1.1748513E+01 -1.1733322E+01 -1.1718155E+01 -1.1703010E+01
 -1.1687889E+01 -1.1672790E+01 -1.1657713E+01 -1.1642660E+01
 -1.1627629E+01 -1.1612621E+01 -1.1597635E+01 -1.1582672E+01
 -1.1567731E+01 -1.1552813E+01 -1.1537918E+01 -1.1523044E+01
 -1.1508194E+01 -1.1493365E+01 -1.1478559E+01 -1.1463775E+01
 -1.1449013E+01 -1.1434273E+01 -1.1419556E+01 -1.1404860E+01
 -1.1390187E+01 -1.1375536E+01 -1.1360906E+01 -1.1346299E+01
 -1.1331713E+01 -1.1317150E+01 -1.1302608E+01 -1.1288088E+01
 -1.1273590E+01 -1.1259113E+01 -1.1244658E+01 -1.1230225E+01
 -1.1215814E+01 -1.1201424E+01 -1.1187055E+01 -1.1172708E+01
 -1.1158383E+01 -1.1144079E+01 -1.1129796E+01 -1.1115535E+01
 -1.1101295E+01 -1.1087076E+01 -1.1072878E+01 -1.1058702E+01
 -1.1044547E+01 -1.1030413E+01 -1.1016300E+01 -1.1002208E+01
 -1.0988137E+01 -1.0974087E+01 -1.0960059E+01 -1.0946051E+01
 -1.0932064E+01 -1.0918097E+01 -1.0904152E+01 -1.0890227E+01
 -1.0876323E+01 -1.0862440E+01 -1.0848578E+01 -1.0834736E+01
 -1.0820914E+01 -1.0807114E+01 -1.0793334E+01 -1.0779574E+01
 -1.0765835E+01 -1.0752116E+01 -1.0738417E+01 -1.0724739E+01
 -1.0711082E+01 -1.0697444E+01 -1.0683827E+01 -1.0670230E+01
 -1.0656653E+01 -1.0643097E+01 -1.0629560E+01 -1.0616044E+01
 -1.0602547E+01 -1.0589071E+01 -1.0575614E+01 -1.0562178E+01
 -1.0548761E+01 -1.0535365E+01 -1.0521988E+01 -1.0508631E+01
 -1.0495294E+01 -1.0481976E+01 -1.0468678E+01 -1.0455400E+01
 -1.0442142E+01 -1.0428903E+01 -1.0415684E+01 -1.0402484E+01
 -1.0389304E+01 -1.0376143E+01 -1.0363002E+01 -1.0349880E+01
 -1.0336777E+01 -1.0323694E+01 -1.0310630E+01 -1.0297586E+01
 -1.0284561E+01 -1.0271554E+01 -1.0258568E+01 -1.0245600E+01
 -1.0232651E+01 -1.0219722E+01 -1.0206811E+01 -1.0193920E+01
 -1.0181047E+01 -1.0168194E+01 -1.0155359E+01 -1.0142544E+01
 -1.0129747E+01 -1.0116969E+01 -1.0104210E+01 -1.0091469E+01
 -1.0078747E+01 -1.0066044E+01 -1.0053360E+01 -1.0040695E+01
 -1.0028048E+01 -1.0015419E+01 -1.0002809E+01 -9.9902178E+00
 -9.9776449E+00 -9.9650904E+00 -9.9525544E+00 -9.9400368E+00
 -9.9275375E+00 -9.9150566E+00 -9.9025940E+00 -9.8901496E+00
 -9.8777235E+00 -9.8653156E+00 -9.8529259E+00 -9.8405543E+00
 -9.8282009E+00 -9.8158655E+00 -9.8035482E+00 -9.7912489E+00
 -9.7789677E+00 -9.7667044E+00 -9.7544590E+00 -9.7422315E+00
 -9.7300219E+00 -9.7178302E+00 -9.7056563E+00 -9.6935002E+00
 -9.6813618E+00 -9.6692411E+00 -9.6571382E+00 -9.6450529E+00
 -9.6329853E+00 -9.6209353E+00 -9.6089029E+00 -9.5968880E+00
 -9.5848906E+00 -9.5729108E+00 -9.5609484E+00 -9.5490034E+00
 -9.5370758E+00 -9.5251657E+00 -9.5132728E+00 -9.5013973E+00
 -9.4895391E+00 -9.4776982E+00 -9.4658744E+00 -9.4540679E+00
 -9.4422786E+00 -9.4305064E+00 -9.4187513E+00 -9.4070133E+00
 -9.3952924E+00 -9.3835885E+00 -9.3719017E+00 -9.3602318E+00
 -9.3485788E+00 -9.3369428E+00 -9.3253237E+00 -9.3137214E+00
 -9.3021360E+00 -9.2905673E+00 -9.2790155E+00 -9.2674804E+00
 -9.2559621E+00 -9.2444604E+00 -9.2329754E+00 -9.2215071E+00
 -9.2100553E+00 -9.1986202E+00 -9.1872016E+00 -9.1757996E+00
 -9.1644140E+00 -9.1530450E+00 -9.1416923E+00 -9.1303562E+00
 -9.1190364E+00 -9.1077329E+00 -9.0964459E+00 -9.0851751E+00
 -9.0739206E+00 -9.0626824E+00 -9.0514604E+00 -9.0402547E+00
 -9.0290651E+00 -9.0178917E+00 -9.0067344E+00 -8.9955932E+00
 -8.9844680E+00 -8.9733589E+00 -8.9622659E+00 -8.9511888E+00
 -8.9401277E+00 -8.9290826E+00 -8.9180534E+00 -8.9070400E+00
 -8.8960425E+00 -8.8850609E+00 -8.8740951E+00 -8.8631450E+00
 -8.8522108E+00 -8.8412922E+00 -8.8303894E+00 -8.8195022E+00
 -8.8086307E+00 -8.7977749E+00 -8.7869346E+00 -8.7761099E+00
 -8.7653008E+00 -8.7545072E+00 -8.7437291E+00 -8.7329665E+00
 -8.7222193E+00 -8.7114876E+00 -8.7007713E+00 -8.6900703E+00
 -8.6793847E+00 -8.6687144E+00 -8.6580594E+00 -8.6474197E+00
 -8.6367953E+00 -8.6261861E+00 -8.6155920E+00 -8.6050132E+00
 -8.5944495E+00 -8.5839009E+00 -8.5733675E+00 -8.5628491E+00
 -8.5523457E+00 -8.5418574E+00 -8.5313841E+00 -8.5209258E+00
 -8.5104824E+00 -8.5000539E+00 -8.4896404E+00 -8.4792417E+00
 -8.4688579E+00 -8.4584890E+00 -8.4481348E+00 -8.4377954E+00
 -8.4274708E+00 -8.4171609E+00 -8.4068658E+00 -8.3965853E+00
 -8.3863195E+00 -8.3760683E+00 -8.3658317E+00 -8.3556097E+00
 -8.3454023E+00 -8.3352095E+00 -8.3250312E+00 -8.3148673E+00
 -8.3047180E+00 -8.2945830E+00 -8.2844626E+00 -8.2743565E+00
 -8.2642648E+00 -8.2541874E+00 -8.2441244E+00 -8.2340757E+00
 -8.2240413E+00 -8.2140211E+00 -8.2040152E+00 -8.1940235E+00
 -8.1840460E+00 -8.1740827E+00 -8.1641335E+00 -8.1541985E+00
 -8.1442775E+00 -8.1343706E+00 -8.1244778E+00 -8.1145990E+00
 -8.1047343E+00 -8.0948835E+00 -8.0850466E+00 -8.0752238E+00
 -8.0654148E+00 -8.0556198E+00 -8.0458386E+00 -8.0360712E+00
 -8.0263177E+00 -8.0165781E+00 -8.0068522E+00 -7.9971400E+00
 -7.9874416E+00 -7.9777569E+00 -7.9680859E+00 -7.9584286E+00
 -7.9487850E+00 -7.9391550E+00 -7.9295385E+00 -7.9199357E+00
 -7.9103464E+00 -7.9007707E+00 -7.8912085E+00 -7.8816598E+00
 -7.8721246E+00 -7.8626028E+00 -7.8530945E+00 -7.8435996E+00
 -7.8341180E+00 -7.8246499E+00 -7.8151950E+00 -7.8057535E+00
 -7.7963254E+00 -7.7869105E+00 -7.7775088E+00 -7.7681204E+00
 -7.7587452E+00 -7.7493832E+00 -7.7400344E+00 -7.7306988E+00
 -7.7213763E+00 -7.7120669E+00 -7.7027706E+00 -7.6934873E+00
 -7.6842171E+00 -7.6749600E+00 -7.6657158E+00 -7.6564846E+00
 -7.6472664E+00 -7.6380612E+00 -7.6288689E+00 -7.6196894E+00
 -7.6105229E+00 -7.6013692E+00 -7.5922284E+00 -7.5831004E+00
 -7.5739851E+00 -7.5648827E+00 -7.5557930E+00 -7.5467161E+00
 -7.5376519E+00 -7.5286004E+00 -7.5195615E+00 -7.5105353E+00
 -7.5015218E+00 -7.4925209E+00 -7.4835325E+00 -7.4745568E+00
B_3+    O_2-
  7.1355002E+06  7.1026532E+06  7.0699574E+06  7.0374122E+06
  7.0050167E+06  6.9727705E+06  6.9406726E+06  6.9087225E+06
  6.8769195E+06  6.8452628E+06  6.8137520E+06  6.7823861E+06
  6.7511647E+06  6.7200869E+06  6.6891522E+06  6.6583600E+06
  6.6277094E+06  6.5972000E+06  6.5668310E+06  6.5366018E+06
  6.5065118E+06  6.4765603E+06  6.4467466E+06  6.4170702E+06
  6.3875304E+06  6.3581266E+06  6.3288581E+06  6.2997244E+06
  6.2707248E+06  6.2418587E+06  6.2131254E+06  6.1845245E+06
  6.1560551E+06  6.1277169E+06  6.0995090E+06  6.0714311E+06
  6.0434824E+06  6.0156623E+06  5.9879704E+06  5.9604059E+06
  5.9329682E+06  5.9056569E+06  5.8784713E+06  5.8514108E+06
  5.8244750E+06  5.7976631E+06  5.7709746E+06  5.7444090E+06
  5.7179657E+06  5.6916440E+06  5.6654436E+06  5.6393638E+06
  5.6134040E+06  5.5875638E+06  5.5618424E+06  5.5362395E+06
  5.5107545E+06  5.4853868E+06  5.4601358E+06  5.4350011E+06
  5.4099821E+06  5.3850782E+06  5.3602890E+06  5.3356139E+06
  5.3110523E+06  5.2866039E+06  5.2622680E+06  5.2380441E+06
  5.2139318E+06  5.1899304E+06  5.1660395E+06  5.1422586E+06
  5.1185872E+06  5.0950247E+06  5.0715707E+06  5.0482247E+06
  5.0249861E+06  5.0018545E+06  4.9788294E+06  4.9559102E+06
  4.9330967E+06  4.9103881E+06  4.8877840E+06  4.8652840E+06
  4.8428876E+06  4.8205942E+06  4.7984035E+06  4.7763149E+06
  4.7543281E+06  4.7324424E+06  4.7106575E+06  4.6889728E+06
  4.6673880E+06  4.6459025E+06  4.6245160E+06  4.6032279E+06
  4.5820378E+06  4.5609452E+06  4.5399497E+06  4.5190509E+06
  4.4982483E+06  4.4775415E+06  4.4569299E+06  4.4364133E+06
  4.4159911E+06  4.3956629E+06  4.3754282E+06  4.3552868E+06
  4.3352380E+06  4.3152815E+06  4.2954170E+06  4.2756438E+06
  4.2559616E+06  4.2363701E+06  4.2168688E+06  4.1974572E+06
  4.1781350E+06  4.1589017E+06  4.1397570E+06  4.1207003E+06
  4.1017315E+06  4.0828499E+06  4.0640553E+06  4.0453472E+06
  4.0267252E+06  4.0081889E+06  3.9897379E+06  3.9713719E+06
  3.9530904E+06  3.9348931E+06  3.9167795E+06  3.8987494E+06
  3.8808022E+06  3.8629376E+06  3.8451554E+06  3.8274548E+06
  3.8098359E+06  3.7922980E+06  3.7748408E+06  3.7574641E+06
  3.7401673E+06  3.7229501E+06  3.7058122E+06  3.6887532E+06
  3.6717727E+06  3.6548704E+06  3.6380459E+06  3.6212988E+06
  3.6046288E+06  3.5880356E+06  3.5715187E+06  3.5550779E+06
  3.5387127E+06  3.5224229E+06  3.5062081E+06  3.4900679E+06
  3.4740020E+06  3.4580101E+06  3.4420918E+06  3.4262468E+06
  3.4104747E+06  3.3947752E+06  3.3791480E+06  3.3635927E+06
  3.3481090E+06  3.3326966E+06  3.3173552E+06  3.3020843E+06
  3.2868838E+06  3.2717532E+06  3.2566923E+06  3.2417007E+06
  3.2267782E+06  3.2119243E+06  3.1971388E+06  3.1824214E+06
  3.1677716E+06  3.1531894E+06  3.1386743E+06  3.1242260E+06
  3.1098442E+06  3.0955286E+06  3.0812789E+06  3.0670948E+06
  3.0529760E+06  3.0389222E+06  3.0249331E+06  3.0110084E+06
  2.9971478E+06  2.9833509E+06  2.9696176E+06  2.9559476E+06
  2.9423404E+06  2.9287958E+06  2.9153137E+06  2.9018936E+06
  2.8885352E+06  2.8752384E+06  2.8620028E+06  2.8488281E+06
  2.8357140E+06  2.8226603E+06  2.8096667E+06  2.7967330E+06
  2.7838587E+06  2.7710438E+06  2.7582878E+06  2.7455905E+06
  2.7329517E+06  2.7203711E+06  2.7078483E+06  2.6953832E+06
  2.6829755E+06  2.6706250E+06  2.6583312E+06  2.6460941E+06
  2.6339133E+06  2.6217886E+06  2.6097197E+06  2.5977063E+06
  2.5857482E+06  2.5738452E+06  2.5619970E+06  2.5502033E+06
  2.5384639E+06  2.5267786E+06  2.5151470E+06  2.5035690E+06
  2.4920443E+06  2.4805726E+06  2.4691538E+06  2.4577874E+06
  2.4464735E+06  2.4352116E+06  2.4240016E+06  2.4128431E+06
  2.4017360E+06  2.3906801E+06  2.3796750E+06  2.3687207E+06
  2.3578167E+06  2.3469629E+06  2.3361591E+06  2.3254050E+06
  2.3147004E+06  2.3040452E+06  2.2934389E+06  2.2828815E+06
  2.2723727E+06  2.2619122E+06  2.2514999E+06  2.2411355E+06
  2.2308189E+06  2.2205498E+06  2.2103279E+06  2.2001530E+06
  2.1900250E+06  2.1799436E+06  2.1699087E+06  2.1599199E+06
  2.1499771E+06  2.1400801E+06  2.1302286E+06  2.1204225E+06
  2.1106616E+06  2.1009455E+06  2.0912742E+06  2.0816474E+06
  2.0720649E+06  2.0625266E+06  2.0530321E+06  2.0435813E+06
  2.0341741E+06  2.0248101E+06  2.0154893E+06  2.0062114E+06
  1.9969761E+06  1.9877834E+06  1.9786331E+06  1.9695248E+06
  1.9604585E+06  1.9514338E+06  1.9424507E+06  1.9335090E+06
  1.9246085E+06  1.9157489E+06  1.9069301E+06  1.8981519E+06
  1.8894141E+06  1.8807166E+06  1.8720590E+06  1.8634414E+06
  1.8548633E+06  1.8463248E+06  1.8378256E+06  1.8293655E+06
  1.8209444E+06  1.8125620E+06  1.8042182E+06  1.7959128E+06
  1.7876456E+06  1.7794166E+06  1.7712254E+06  1.7630718E+06
  1.7549558E+06  1.7468773E+06  1.7388359E+06  1.7308314E+06
  1.7228639E+06  1.7149330E+06  1.7070386E+06  1.6991806E+06
  1.6913587E+06  1.6835729E+06  1.6758228E+06  1.6681085E+06
  1.6604297E+06  1.6527862E+06  1.6451779E+06  1.6376046E+06
  1.6300662E+06  1.6225625E+06  1.6150933E+06  1.6076585E+06
  1.6002580E+06  1.5928915E+06  1.5855589E+06  1.5782601E+06
  1.5709949E+06  1.5637631E+06  1.5565646E+06  1.5493992E+06
  1.5422669E+06  1.5351673E+06  1.5281004E+06  1.5210661E+06
  1.5140642E+06  1.5070945E+06  1.5001568E+06  1.4932511E+06
  1.4863772E+06  1.4795350E+06  1.4727242E+06  1.4659448E+06
  1.4591966E+06  1.4524794E+06  1.4457932E+06  1.4391378E+06
  1.4325130E+06  1.4259187E+06  1.4193547E+06  1.4128210E+06
  1.4063173E+06  1.3998436E+06  1.3933997E+06  1.3869854E+06
  1.3806007E+06  1.3742453E+06  1.3679192E+06  1.3616223E+06
  1.3553543E+06  1.3491152E+06  1.3429048E+06  1.3367230E+06
  1.3305696E+06  1.3244446E+06  1.3183478E+06  1.3122790E+06
  1.3062382E+06  1.3002251E+06  1.2942398E+06  1.2882820E+06
  1.2823516E+06  1.2764486E+06  1.2705727E+06  1.2647238E+06
  1.2589019E+06  1.2531068E+06  1.2473383E+06  1.2415964E+06
  1.2358810E+06  1.2301918E+06  1.2245288E+06  1.2188920E+06
  1.2132810E+06  1.2076959E+06  1.2021365E+06  1.1966027E+06
  1.1910944E+06  1.1856113E+06  1.1801537E+06  1.1747210E+06
  1.1693134E+06  1.1639307E+06  1.1585727E+06  1.1532395E+06
  1.1479307E+06  1.1426465E+06  1.1373865E+06  1.1321507E+06
  1.1269391E+06  1.1217515E+06  1.1165876E+06  1.1114477E+06
  1.1063313E+06  1.1012385E+06  1.0961692E+06  1.0911232E+06
  1.0861004E+06  1.0811007E+06  1.0761241E+06  1.0711703E+06
  1.0662394E+06  1.0613312E+06  1.0564455E+06  1.0515824E+06
  1.0467416E+06  1.0419231E+06  1.0371269E+06  1.0323526E+06
  1.0276004E+06  1.0228700E+06  1.0181614E+06  1.0134745E+06
  1.0088091E+06  1.0041653E+06  9.9954278E+05  9.9494160E+05
  9.9036150E+05  9.8580263E+05  9.8126460E+05  9.7674758E+05
  9.7225125E+05  9.6777570E+05  9.6332070E+05  9.5888625E+05
  9.5447220E+05  9.5007848E+05  9.4570493E+05  9.4135155E+05
  9.3701828E+05  9.3270488E+05  9.2841135E+05  9.2413755E+05
  9.1988348E+05  9.1564890E+05  9.1143390E+05  9.0723833E+05
  9.0306203E+05  8.9890493E+05  8.9476695E+05  8.9064810E+05
  8.8654815E+05  8.8246710E+05  8.7840480E+05  8.7436125E+05
  8.7033630E+05  8.6632988E+05  8.6234183E+05  8.5837223E+05
  8.5442085E+05  8.5048770E+05  8.4657263E+05  8.4267563E+05
  8.3879648E+05  8.3493525E+05  8.3109180E+05  8.2726598E+05
  8.2345785E+05  8.1966720E+05  8.1589403E+05  8.1213818E+05
  8.0839965E+05  8.0467838E+05  8.0097413E+05  7.9728705E+05
  7.9361685E+05  7.8996360E+05  7.8632715E+05  7.8270743E+05
  7.7910435E+05  7.7551793E+05  7.7194800E+05  7.6839443E+05
  7.6485728E+05  7.6133640E+05  7.5783173E+05  7.5434318E+05
  7.5087075E+05  7.4741423E+05  7.4397364E+05  7.4054890E+05
  7.3713992E+05  7.3374663E+05  7.3036896E+05  7.2700685E+05
  7.2366020E+05  7.2032897E+05  7.1701307E+05  7.1371243E+05
  7.1042699E+05  7.0715666E+05  7.0390140E+05  7.0066112E+05
  6.9743576E+05  6.9422524E+05  6.9102950E+05  6.8784848E+05
  6.8468210E+05  6.8153029E+05  6.7839299E+05  6.7527013E+05
  6.7216165E+05  6.6906748E+05  6.6598755E+05  6.6292180E+05
  6.5987016E+05  6.5683257E+05  6.5380896E+05  6.5079927E+05
  6.4780344E+05  6.4482140E+05  6.4185308E+05  6.3889843E+05
  6.3595738E+05  6.3302987E+05  6.3011583E+05  6.2721521E+05
  6.2432794E+05  6.2145396E+05  6.1859321E+05  6.1574564E+05
  6.1291116E+05  6.1008974E+05  6.0728130E+05  6.0448580E+05
  6.0170316E+05  5.9893333E+05  5.9617625E+05  5.9343186E+05
  5.9070011E+05  5.8798093E+05  5.8527427E+05  5.8258007E+05
  5.7989827E+05  5.7722882E+05  5.7457165E+05  5.7192671E+05
  5.6929395E+05  5.6667332E+05  5.6406474E+05  5.6146817E+05
  5.5888355E+05  5.5631084E+05  5.5374997E+05  5.5120088E+05
  5.4866353E+05  5.4613786E+05  5.4362381E+05  5.4112134E+05
  5.3863039E+05  5.3615090E+05  5.3368283E+05  5.3122613E+05
  5.2878072E+05  5.2634657E+05  5.2392364E+05  5.2151186E+05
  5.1911117E+05  5.1672154E+05  5.1434291E+05  5.1197522E+05
  5.0961844E+05  5.0727251E+05  5.0493737E+05  5.0261298E+05
  5.0029930E+05  4.9799627E+05  4.9570383E+05  4.9342195E+05
  4.9115057E+05  4.8888965E+05  4.8663914E+05  4.8439898E+05
  4.8216914E+05  4.7994956E+05  4.7774021E+05  4.7554102E+05
  4.7335196E+05  4.7117297E+05  4.6900401E+05  4.6684504E+05
  4.6469600E+05  4.6255686E+05  4.6042757E+05  4.5830807E+05
  4.5619833E+05  4.5409831E+05  4.5200795E+05  4.4992721E+05
  4.4785606E+05  4.4579444E+05  4.4374231E+05  4.4169962E+05
  4.3966634E+05  4.3764242E+05  4.3562781E+05  4.3362248E+05
  4.3162637E+05  4.2963947E+05  4.2766170E+05  4.2569303E+05
  4.2373344E+05  4.2178286E+05  4.1984126E+05  4.1790860E+05
  4.1598483E+05  4.1406992E+05  4.1216383E+05  4.1026651E+05
  4.0837793E+05  4.0649803E+05  4.0462679E+05  4.0276417E+05
  4.0091012E+05  3.9906461E+05  3.9722758E+05  3.9539902E+05
  3.9357887E+05  3.9176711E+05  3.8996368E+05  3.8816855E+05
  3.8638169E+05  3.8460305E+05  3.8283260E+05  3.8107031E+05
  3.7931612E+05  3.7757000E+05  3.7583193E+05  3.7410186E+05
  3.7237975E+05  3.7066557E+05  3.6895928E+05  3.6726084E+05
  3.6557023E+05  3.6388739E+05  3.6221231E+05  3.6054493E+05
  3.5888522E+05  3.5723316E+05  3.5558870E+05  3.5395182E+05
  3.5232247E+05  3.5070062E+05  3.4908623E+05  3.4747928E+05
  3.4587972E+05  3.4428752E+05  3.4270266E+05  3.4112510E+05
  3.3955479E+05  3.3799171E+05  3.3643583E+05  3.3488711E+05
  3.3334552E+05  3.3181103E+05  3.3028359E+05  3.2876319E+05
  3.2724980E+05  3.2574336E+05  3.2424386E+05  3.2275127E+05
  3.2126554E+05  3.1978665E+05  3.1831457E+05  3.1684927E+05
  3.1539071E+05  3.1393887E+05  3.1249371E+05  3.1105520E+05
  3.0962332E+05  3.0819803E+05  3.0677929E+05  3.0536709E+05
  3.0396139E+05  3.0256216E+05  3.0116937E+05  2.9978300E+05
  2.9840300E+05  2.9702936E+05  2.9566203E+05  2.9430101E+05
  2.9294625E+05  2.9159773E+05  2.9025541E+05  2.8891927E+05
  2.8758929E+05  2.8626542E+05  2.8494765E+05  2.8363595E+05
  2.8233028E+05  2.8103063E+05  2.7973695E+05  2.7844924E+05
  2.7716745E+05  2.7589156E+05  2.7462155E+05  2.7335738E+05
  2.7209903E+05  2.7084647E+05  2.6959967E+05  2.6835862E+05
  2.6712329E+05  2.6589363E+05  2.6466964E+05  2.6345128E+05
  2.6223853E+05  2.6103137E+05  2.5982975E+05  2.5863368E+05
  2.5744310E+05  2.5625801E+05  2.5507838E+05  2.5390417E+05
  2.5273537E+05  2.5157195E+05  2.5041389E+05  2.4926115E+05
  2.4811372E+05  2.4697157E+05  2.4583469E+05  2.4470303E+05
  2.4357659E+05  2.4245533E+05  2.4133923E+05  2.4022827E+05
  2.3912243E+05  2.3802167E+05  2.3692598E+05  2.3583533E+05
  2.3474971E+05  2.3366909E+05  2.3259343E+05  2.3152273E+05
  2.3045696E+05  2.2939609E+05  2.2834011E+05  2.2728899E+05
  2.2624271E+05  2.2520124E+05  2.2416457E+05  2.2313267E+05
  2.2210552E+05  2.2108310E+05  2.2006538E+05  2.1905235E+05
  2.1804398E+05  2.1704026E+05  2.1604115E+05  2.1504665E+05
  2.1405672E+05  2.1307135E+05  2.1209051E+05  2.1111419E+05
  2.1014237E+05  2.0917502E+05  2.0821212E+05  2.0725365E+05
  2.0629960E+05  2.0534994E+05  2.0440465E+05  2.0346371E+05
  2.0252710E+05  2.0159480E+05  2.0066680E+05  1.9974307E+05
  1.9882359E+05  1.9790834E+05  1.9699730E+05  1.9609046E+05
  1.9518780E+05  1.9428929E+05  1.9339491E+05  1.9250465E+05
  1.9161850E+05  1.9073642E+05  1.8985840E+05  1.8898442E+05
  1.8811446E+05  1.8724851E+05  1.8638655E+05  1.8552855E+05
  1.8467450E+05  1.8382439E+05  1.8297819E+05  1.8213588E+05
  1.8129746E+05  1.8046289E+05  1.7963216E+05  1.7880526E+05
  1.7798216E+05  1.7716285E+05  1.7634731E+05  1.7553553E+05
  1.7472749E+05  1.7392316E+05  1.7312254E+05  1.7232560E+05
  1.7153233E+05  1.7074271E+05  1.6995673E+05  1.6917437E+05
  1.6839560E+05  1.6762043E+05  1.6684882E+05  1.6608076E+05
  1.6531624E+05  1.6455524E+05  1.6379774E+05  1.6304372E+05
  1.6229318E+05  1.6154609E+05  1.6080245E+05  1.6006222E+05
  1.5932540E+05  1.5859198E+05  1.5786193E+05  1.5713525E+05
  1.5641190E+05  1.5569189E+05  1.5497519E+05  1.5426179E+05
  1.5355167E+05  1.5284483E+05  1.5214124E+05  1.5144088E+05
  1.5074375E+05  1.5004983E+05  1.4935910E+05  1.4867156E+05
  1.4798717E+05  1.4730594E+05  1.4662784E+05  1.4595287E+05
  1.4528100E+05  1.4461223E+05  1.4394653E+05  1.4328390E+05
  1.4262432E+05  1.4196778E+05  1.4131425E+05  1.4066374E+05
  1.4001622E+05  1.3937168E+05  1.3873011E+05  1.3809149E+05
  1.3745582E+05  1.3682306E+05  1.3619322E+05  1.3556628E+05
  1.3494223E+05  1.3432105E+05  1.3370273E+05  1.3308725E+05
  1.3247461E+05  1.3186478E+05  1.3125777E+05  1.3065355E+05
  1.3005211E+05  1.2945344E+05  1.2885752E+05  1.2826435E+05
  1.2767391E+05  1.2708619E+05  1.2650117E+05  1.2591884E+05
  1.2533920E+05  1.2476222E+05  1.2418790E+05  1.2361622E+05
  1.2304718E+05  1.2248076E+05  1.2191694E+05  1.2135572E+05
  1.2079708E+05  1.2024101E+05  1.1968751E+05  1.1913655E+05
  1.1858813E+05  1.1804222E+05  1.1749884E+05  1.1695796E+05
  1.1641956E+05  1.1588364E+05  1.1535020E+05  1.1481920E+05
  1.1429066E+05  1.1376454E+05  1.1324084E+05  1.1271956E+05
  1.1220068E+05  1.1168418E+05  1.1117006E+05  1.1065832E+05
  1.1014892E+05  1.0964187E+05  1.0913715E+05  1.0863476E+05
  1.0813468E+05  1.0763690E+05  1.0714142E+05  1.0664821E+05
  1.0615727E+05  1.0566860E+05  1.0518218E+05  1.0469798E+05
  1.0421603E+05  1.0373629E+05  1.0325876E+05  1.0278343E+05
  1.0231028E+05  1.0183931E+05  1.0137052E+05  1.0090388E+05
  1.0043939E+05  9.9977025E+04  9.9516803E+04  9.9058695E+04
  9.8602695E+04  9.8148795E+04  9.7696988E+04  9.7247258E+04
  9.6799598E+04  9.6354000E+04  9.5910450E+04  9.5468948E+04
  9.5029470E+04  9.4592018E+04  9.4156583E+04  9.3723150E+04
  9.3291713E+04  9.2862263E+04  9.2434793E+04  9.2009280E+04
  9.1585733E+04  9.1164135E+04  9.0744480E+04  9.0326753E+04
  8.9910953E+04  8.9497065E+04  8.9085083E+04  8.8674990E+04
  8.8266795E+04  8.7860475E+04  8.7456023E+04  8.7053438E+04
  8.6652705E+04  8.6253810E+04  8.5856760E+04  8.5461533E+04
  8.5068128E+04  8.4676530E+04  8.4286740E+04  8.3898743E+04
  8.3512530E+04  8.3128095E+04  8.2745430E+04  8.2364528E+04
  8.1985380E+04  8.1607973E+04  8.1232305E+04  8.0858370E+04
  8.0486153E+04  8.0115645E+04  7.9746848E+04  7.9379753E+04
  7.9014338E+04  7.8650610E+04  7.8288555E+04  7.7928173E+04
  7.7569440E+04  7.7212365E+04  7.6856933E+04  7.6503135E+04
  7.6150973E+04  7.5800423E+04  7.5430650E+04  7.5083393E+04
  7.4737738E+04  7.4393666E+04  7.4051173E+04  7.3710248E+04
  7.3370884E+04  7.3033071E+04  7.2696800E+04  7.2362065E+04
  7.2028854E+04  7.1697161E+04  7.1366976E+04  7.1038291E+04
  7.0711097E+04  7.0385387E+04  7.0061153E+04  6.9738384E+04
  6.9417074E+04  6.9097214E+04  6.8778796E+04  6.8461812E+04
  6.8146253E+04  6.7832113E+04  6.7519382E+04  6.7208053E+04
  6.6898118E+04  6.6589568E+04  6.6282398E+04  6.5976596E+04
  6.5672159E+04  6.5369075E+04  6.5067339E+04  6.4766943E+04
  6.4467879E+04  6.4170139E+04  6.3873716E+04  6.3578603E+04
  6.3284792E+04  6.2992276E+04  6.2701046E+04  6.2411098E+04
  6.2122421E+04  6.1835011E+04  6.1548859E+04  6.1263958E+04
  6.0980302E+04  6.0697882E+04  6.0416693E+04  6.0136727E+04
  5.9857976E+04  5.9580435E+04  5.9304097E+04  5.9028954E+04
  5.8755000E+04  5.8482227E+04  5.8210631E+04  5.7940202E+04
  5.7670937E+04  5.7402826E+04  5.7135863E+04  5.6870044E+04
  5.6605360E+04  5.6341805E+04  5.6079374E+04  5.5818059E+04
  5.5557854E+04  5.5298754E+04  5.5040751E+04  5.4783839E+04
  5.4528013E+04  5.4273266E+04  5.4019592E+04  5.3766985E+04
  5.3515439E+04  5.3264948E+04  5.3015505E+04  5.2767106E+04
  5.2519743E+04  5.2273412E+04  5.2028107E+04  5.1783821E+04
  5.1540548E+04  5.1298285E+04  5.1057023E+04  5.0816758E+04
  5.0577485E+04  5.0339197E+04  5.0101889E+04  4.9865556E+04
  4.9630193E+04  4.9395792E+04  4.9162350E+04  4.8929861E+04
  4.8698319E+04  4.8467720E+04  4.8238057E+04  4.8009326E+04
  4.7781522E+04  4.7554640E+04  4.7328673E+04  4.7103617E+04
  4.6879468E+04  4.6656220E+04  4.6433867E+04  4.6212407E+04
  4.5991832E+04  4.5772138E+04  4.5553320E+04  4.5335374E+04
  4.5118295E+04  4.4902078E+04  4.4686718E+04  4.4472210E+04
  4.4258550E+04  4.4045734E+04  4.3833755E+04  4.3622612E+04
  4.3412297E+04  4.3202807E+04  4.2994138E+04  4.2786284E+04
  4.2579242E+04  4.2373007E+04  4.2167576E+04  4.1962942E+04
  4.1759102E+04  4.1556053E+04  4.1353789E+04  4.1152306E+04
  4.0951601E+04  4.0751669E+04  4.0552505E+04  4.0354106E+04
  4.0156469E+04  3.9959588E+04  3.9763460E+04  3.9568080E+04
  3.9373445E+04  3.9179552E+04  3.8986394E+04  3.8793971E+04
  3.8602277E+04  3.8411308E+04  3.8221061E+04  3.8031532E+04
  3.7842717E+04  3.7654613E+04  3.7467216E+04  3.7280522E+04
  3.7094528E+04  3.6909230E+04  3.6724625E+04  3.6540708E+04
  3.6357477E+04  3.6174929E+04  3.5993058E+04  3.5811863E+04
  3.5631341E+04  3.5451486E+04  3.5272297E+04  3.5093769E+04
  3.4915901E+04  3.4738687E+04  3.4562126E+04  3.4386213E+04
  3.4210946E+04  3.4036322E+04  3.3862337E+04  3.3688988E+04
  3.3516274E+04  3.3344189E+04  3.3172731E+04  3.3001898E+04
  3.2831686E+04  3.2662092E+04  3.2493113E+04  3.2324747E+04
  3.2156991E+04  3.1989842E+04  3.1823296E+04  3.1657352E+04
  3.1492006E+04  3.1327256E+04  3.1163098E+04  3.0999531E+04
  3.0836552E+04  3.0674156E+04  3.0512344E+04  3.0351111E+04
  3.0190455E+04  3.0030374E+04  2.9870865E+04  2.9711925E+04
  2.9553552E+04  2.9395744E+04  2.9238497E+04  2.9081811E+04
  2.8925681E+04  2.8770107E+04  2.8615085E+04  2.8460613E+04
  2.8306689E+04  2.8153311E+04  2.8000476E+04  2.7848182E+04
  2.7696427E+04  2.7545208E+04  2.7394524E+04  2.7244372E+04
  2.7094751E+04  2.6945657E+04  2.6797089E+04  2.6649045E+04
  2.6501523E+04  2.6354521E+04  2.6208036E+04  2.6062067E+04
  2.5916612E+04  2.5771670E+04  2.5627236E+04  2.5483311E+04
  2.5339892E+04  2.5196977E+04  2.5054564E+04  2.4912652E+04
  2.4771239E+04  2.4630322E+04  2.4489901E+04  2.4349973E+04
  2.4210536E+04  2.4071590E+04  2.3933132E+04  2.3795159E+04
  2.3657672E+04  2.3520669E+04  2.3384147E+04  2.3248105E+04
  2.3112541E+04  2.2977454E+04  2.2842842E+04  2.2708704E+04
  2.2575038E+04  2.2441843E+04  2.2309116E+04  2.2176858E+04
  2.2045066E+04  2.1913739E+04  2.1782875E+04  2.1652472E+04
  2.1522531E+04  2.1393049E+04  2.1264025E+04  2.1135457E+04
  2.1007344E+04  2.0879686E+04  2.0752480E+04  2.0625725E+04
  2.0499421E+04  2.0373565E+04  2.0248157E+04  2.0123195E+04
  1.9998679E+04  1.9874606E+04  1.9750976E+04  1.9627789E+04
  1.9505041E+04  1.9382733E+04  1.9260864E+04  1.9139432E+04
  1.9018436E+04  1.8897875E+04  1.8777747E+04  1.8658053E+04
  1.8538792E+04  1.8419960E+04  1.8301559E+04  1.8183587E+04
  1.8066044E+04  1.7948927E+04  1.7832236E+04  1.7715971E+04
  1.7600130E+04  1.7484712E+04  1.7369717E+04  1.7255144E+04
  1.7140991E+04  1.7027258E+04  1.6913944E+04  1.6801049E+04
  1.6688570E+04  1.6576509E+04  1.6464863E+04  1.6353633E+04
  1.6242817E+04  1.6132414E+04  1.6022424E+04  1.5912846E+04
  1.5803680E+04  1.5694924E+04  1.5586578E+04  1.5478642E+04
  1.5371114E+04  1.5263993E+04  1.5157280E+04  1.5050975E+04
  1.4945074E+04  1.4839579E+04  1.4734489E+04  1.4629802E+04
  1.4525520E+04  1.4421640E+04  1.4318163E+04  1.4215087E+04
  1.4112413E+04  1.4010139E+04  1.3908266E+04  1.3806792E+04
  1.3705717E+04  1.3605041E+04  1.3504763E+04  1.3404882E+04
  1.3305398E+04  1.3206311E+04  1.3107621E+04  1.3009326E+04
  1.2911426E+04  1.2813921E+04  1.2716810E+04  1.2620093E+04
  1.2523770E+04  1.2427840E+04  1.2332303E+04  1.2237158E+04
  1.2142404E+04  1.2048042E+04  1.1954072E+04  1.1860491E+04
  1.1767301E+04  1.1674502E+04  1.1582092E+04  1.1490071E+04
  1.1398439E+04  1.1307197E+04  1.1216342E+04  1.1125875E+04
  1.1035796E+04  1.0946105E+04  1.0856800E+04  1.0767882E+04
  1.0679351E+04  1.0591206E+04  1.0503446E+04  1.0416073E+04
  1.0329085E+04  1.0242482E+04  1.0156263E+04  1.0070429E+04
  9.9849795E+03  9.8999145E+03  9.8152328E+03  9.7309343E+03
  9.6470198E+03  9.5634885E+03  9.4803390E+03  9.3975735E+03
  9.3151898E+03  9.2331878E+03  9.1515683E+03  9.0703305E+03
  8.9894745E+03  8.9089995E+03  8.8289063E+03  8.7491933E+03
  8.6698613E+03  8.5909095E+03  8.5123388E+03  8.4341475E+03
  8.3563365E+03  8.2789058E+03  8.2018538E+03  8.1251820E+03
  8.0488890E+03  7.9729755E+03  7.8974408E+03  7.8222840E+03
  7.7475068E+03  7.6731075E+03  7.5990863E+03  7.5254430E+03
  7.4521779E+03  7.3792904E+03  7.3067804E+03  7.2346477E+03
  7.1628921E+03  7.0915136E+03  7.0205120E+03  6.9498869E+03
  6.8796384E+03  6.8097662E+03  6.7402703E+03  6.6711503E+03
  6.6024061E+03  6.5340376E+03  6.4660445E+03  6.3984269E+03
  6.3311843E+03  6.2643167E+03  6.1978239E+03  6.1317057E+03
  6.0659620E+03  6.0005925E+03  5.9355972E+03  5.8709757E+03
  5.8067280E+03  5.7428538E+03  5.6793530E+03  5.6162252E+03
  5.5534706E+03  5.4910886E+03  5.4290793E+03  5.3674423E+03
  5.3061775E+03  5.2452847E+03  5.1847637E+03  5.1246141E+03
  5.0648360E+03  5.0054289E+03  4.9463928E+03  4.8877274E+03
  4.8294323E+03  4.7715076E+03  4.7139528E+03  4.6567677E+03
  4.5999522E+03  4.5435059E+03  4.4874286E+03  4.4317201E+03
  4.3763800E+03  4.3214081E+03  4.2668043E+03  4.2125681E+03
  4.1586993E+03  4.1051976E+03  4.0520627E+03  3.9992944E+03
  3.9468923E+03  3.8948560E+03  3.8431854E+03  3.7918801E+03
  3.7409398E+03  3.6903641E+03  3.6401526E+03  3.5903052E+03
  3.5408213E+03  3.4917008E+03  3.4429431E+03  3.3945479E+03
  3.3465149E+03  3.2988437E+03  3.2515338E+03  3.2045849E+03
  3.1579967E+03  3.1117685E+03  3.0659002E+03  3.0203912E+03
  2.9752410E+03  2.9304494E+03  2.8860157E+03  2.8419396E+03
  2.7982205E+03  2.7548582E+03  2.7118519E+03  2.6692013E+03
  2.6269058E+03  2.5849649E+03  2.5433783E+03  2.5021451E+03
  2.4612651E+03  2.4207376E+03  2.3805621E+03  2.3407379E+03
  2.3012647E+03  2.2621416E+03  2.2233683E+03  2.1849440E+03
  2.1468682E+03  2.1091403E+03  2.0717595E+03  2.0347253E+03
  1.9980371E+03  1.9616940E+03  1.9256957E+03  1.8900411E+03
  1.8547298E+03  1.8197611E+03  1.7851341E+03  1.7508482E+03
  1.7169026E+03  1.6832967E+03  1.6500296E+03  1.6171004E+03
  1.5845086E+03  1.5522533E+03  1.5203336E+03  1.4887487E+03
  1.4574980E+03  1.4265803E+03  1.3959950E+03  1.3657412E+03
  1.3358179E+03  1.3062242E+03  1.2769594E+03  1.2480224E+03
  1.2194123E+03  1.1911283E+03  1.1631692E+03  1.1355341E+03
  1.1082221E+03  1.0812321E+03  1.0545632E+03  1.0282144E+03
  1.0021844E+03  9.7647240E+02  9.5107733E+02  9.2599793E+02
  9.0123323E+02  8.7678203E+02  8.5264335E+02  8.2881585E+02
  8.0529855E+02  7.8209018E+02  7.5918960E+02  7.3659561E+02
  7.1430695E+02  6.9232241E+02  6.7064074E+02  6.4926068E+02
  6.2818094E+02  6.0740024E+02  5.8691725E+02  5.6673066E+02
  5.4683912E+02  5.2724127E+02  5.0793573E+02  4.8892112E+02
  4.7019601E+02  4.5175898E+02  4.3360860E+02  4.1574340E+02
  3.9816191E+02  3.8086262E+02  3.6384402E+02  3.4710460E+02
  3.3064279E+02  3.1445705E+02  2.9854577E+02  2.8290737E+02
  2.6754022E+02  2.5244270E+02  2.3761313E+02  2.2304986E+02
  2.0875119E+02  1.9471541E+02  1.8094079E+02  1.6742558E+02
  1.5416803E+02  1.4116634E+02  1.2841871E+02  1.1592330E+02
  1.0367830E+02  9.1681815E+01  7.9931985E+01  6.8426904E+01
  5.7164645E+01  4.6143269E+01  3.5360815E+01  2.4815301E+01
  1.4504726E+01  4.4270664E+00 -5.4197189E+00 -1.5037694E+01
 -2.4428942E+01 -3.3595568E+01 -4.2539697E+01 -5.1263477E+01
 -5.9769074E+01 -6.8058679E+01 -7.6134503E+01 -8.3998770E+01
 -9.1653750E+01 -9.9101700E+01 -1.0634493E+02 -1.1338575E+02
 -1.2022651E+02 -1.2686956E+02 -1.3331730E+02 -1.3957213E+02
 -1.4563648E+02 -1.5151280E+02 -1.5720358E+02 -1.6271131E+02
 -1.6803850E+02 -1.7318771E+02 -1.7816150E+02 -1.8296246E+02
 -1.8759321E+02 -1.9205639E+02 -1.9635465E+02 -2.0049068E+02
 -2.0446720E+02 -2.0828693E+02 -2.1195263E+02 -2.1546707E+02
 -2.1883308E+02 -2.2205348E+02 -2.2513111E+02 -2.2806887E+02
 -2.3086964E+02 -2.3353638E+02 -2.3607202E+02 -2.3847954E+02
 -2.4076195E+02 -2.4292228E+02 -2.4496358E+02 -2.4688894E+02
 -2.4870145E+02 -2.5040425E+02 -2.5200050E+02 -2.5349338E+02
 -2.5488610E+02 -2.5618190E+02 -2.5738403E+02 -2.5849579E+02
 -2.5952048E+02 -2.6046146E+02 -2.6132210E+02 -2.6210577E+02
 -2.6281592E+02 -2.6345598E+02 -2.6402943E+02 -2.6453978E+02
 -2.6499056E+02 -2.6538533E+02 -2.6572767E+02 -2.6602121E+02
 -2.6626956E+02 -2.6647643E+02 -2.6664548E+02 -2.6678046E+02
 -2.6688512E+02 -2.6696325E+02 -2.6701865E+02 -2.6705517E+02
 -2.6707667E+02 -2.6708705E+02 -2.6709024E+02 -2.6712061E+02
 -2.6711893E+02 -2.6711569E+02 -2.6711089E+02 -2.6710455E+02
 -2.6709666E+02 -2.6708723E+02 -2.6707627E+02 -2.6706377E+02
 -2.6704973E+02 -2.6703417E+02 -2.6701709E+02 -2.6699849E+02
 -2.6697836E+02 -2.6695673E+02 -2.6693358E+02 -2.6690893E+02
 -2.6688278E+02 -2.6685512E+02 -2.6682598E+02 -2.6679534E+02
 -2.6676321E+02 -2.6672960E+02 -2.6669450E+02 -2.6665793E+02
 -2.6661989E+02 -2.6658037E+02 -2.6653939E+02 -2.6649695E+02
 -2.6645303E+02 -2.6640767E+02 -2.6636086E+02 -2.6631260E+02
 -2.6626289E+02 -2.6621174E+02 -2.6615915E+02 -2.6610512E+02
 -2.6604966E+02 -2.6599278E+02 -2.6593447E+02 -2.6587475E+02
 -2.6581360E+02 -2.6575104E+02 -2.6568707E+02 -2.6562170E+02
 -2.6555492E+02 -2.6548674E+02 -2.6541716E+02 -2.6534620E+02
 -2.6527385E+02 -2.6520011E+02 -2.6512499E+02 -2.6504849E+02
 -2.6497062E+02 -2.6489138E+02 -2.6481077E+02 -2.6472879E+02
 -2.6464546E+02 -2.6456077E+02 -2.6447473E+02 -2.6438733E+02
 -2.6429859E+02 -2.6420852E+02 -2.6411710E+02 -2.6402434E+02
 -2.6393026E+02 -2.6383484E+02 -2.6373810E+02 -2.6364005E+02
 -2.6354067E+02 -2.6343998E+02 -2.6333798E+02 -2.6323467E+02
 -2.6313006E+02 -2.6302415E+02 -2.6291695E+02 -2.6280845E+02
 -2.6269867E+02 -2.6258759E+02 -2.6247524E+02 -2.6236161E+02
 -2.6224671E+02 -2.6213053E+02 -2.6201309E+02 -2.6189438E+02
 -2.6177441E+02 -2.6165319E+02 -2.6153071E+02 -2.6140698E+02
 -2.6128201E+02 -2.6115580E+02 -2.6102834E+02 -2.6089965E+02
 -2.6076973E+02 -2.6063858E+02 -2.6050621E+02 -2.6037261E+02
 -2.6023780E+02 -2.6010177E+02 -2.5996454E+02 -2.5982609E+02
 -2.5968644E+02 -2.5954560E+02 -2.5940356E+02 -2.5926032E+02
 -2.5911590E+02 -2.5897028E+02 -2.5882349E+02 -2.5867553E+02
 -2.5852638E+02 -2.5837607E+02 -2.5822458E+02 -2.5807193E+02
 -2.5791812E+02 -2.5776316E+02 -2.5760705E+02 -2.5744978E+02
 -2.5729136E+02 -2.5713180E+02 -2.5697111E+02 -2.5680928E+02
 -2.5664631E+02 -2.5648222E+02 -2.5631701E+02 -2.5615067E+02
 -2.5598321E+02 -2.5581464E+02 -2.5564496E+02 -2.5547417E+02
 -2.5530228E+02 -2.5512929E+02 -2.5495520E+02 -2.5478003E+02
 -2.5460375E+02 -2.5442640E+02 -2.5424797E+02 -2.5406845E+02
 -2.5388786E+02 -2.5370620E+02 -2.5352347E+02 -2.5333967E+02
 -2.5315482E+02 -2.5296891E+02 -2.5278194E+02 -2.5259393E+02
 -2.5240487E+02 -2.5221476E+02 -2.5202362E+02 -2.5183144E+02
 -2.5163822E+02 -2.5144399E+02 -2.5124872E+02 -2.5105244E+02
 -2.5085513E+02 -2.5065681E+02 -2.5045748E+02 -2.5025714E+02
 -2.5005580E+02 -2.4985346E+02 -2.4965012E+02 -2.4944579E+02
 -2.4924047E+02 -2.4903416E+02 -2.4882688E+02 -2.4861861E+02
 -2.4840937E+02 -2.4819915E+02 -2.4798797E+02 -2.4777583E+02
 -2.4756272E+02 -2.4734865E+02 -2.4713363E+02 -2.4691766E+02
 -2.4670075E+02 -2.4648289E+02 -2.4626409E+02 -2.4604436E+02
 -2.4582369E+02 -2.4560210E+02 -2.4537958E+02 -2.4515613E+02
 -2.4493178E+02 -2.4470650E+02 -2.4448031E+02 -2.4425322E+02
 -2.4402522E+02 -2.4379632E+02 -2.4356653E+02 -2.4333584E+02
 -2.4310427E+02 -2.4287180E+02 -2.4263846E+02 -2.4240423E+02
 -2.4216913E+02 -2.4193316E+02 -2.4169631E+02 -2.4145861E+02
 -2.4122004E+02 -2.4098062E+02 -2.4074034E+02 -2.4049921E+02
 -2.4025724E+02 -2.4001442E+02 -2.3977076E+02 -2.3952626E+02
 -2.3928094E+02 -2.3903478E+02 -2.3878780E+02 -2.3853999E+02
 -2.3829137E+02 -2.3804193E+02 -2.3779169E+02 -2.3754063E+02
 -2.3728877E+02 -2.3703611E+02 -2.3678265E+02 -2.3652840E+02
 -2.3627336E+02 -2.3601753E+02 -2.3576092E+02 -2.3550353E+02
 -2.3524536E+02 -2.3498642E+02 -2.3472672E+02 -2.3446625E+02
 -2.3420502E+02 -2.3394303E+02 -2.3368028E+02 -2.3341679E+02
 -2.3315255E+02 -2.3288756E+02 -2.3262184E+02 -2.3235537E+02
 -2.3208818E+02 -2.3182025E+02 -2.3155160E+02 -2.3128223E+02
 -2.3101214E+02 -2.3074133E+02 -2.3046982E+02 -2.3019760E+02
 -2.2992467E+02 -2.2965104E+02 -2.2937671E+02 -2.2910168E+02
 -2.2882598E+02 -2.2854958E+02 -2.2827250E+02 -2.2799474E+02
 -2.2771630E+02 -2.2743719E+02 -2.2715741E+02 -2.2687697E+02
 -2.2659587E+02 -2.2631411E+02 -2.2603169E+02 -2.2574862E+02
 -2.2546491E+02 -2.2518055E+02 -2.2489555E+02 -2.2460992E+02
 -2.2432364E+02 -2.2403675E+02 -2.2374923E+02 -2.2346108E+02
 -2.2317231E+02 -2.2288293E+02 -2.2259294E+02 -2.2230234E+02
 -2.2201114E+02 -2.2171933E+02 -2.2142693E+02 -2.2113393E+02
 -2.2084034E+02 -2.2054616E+02 -2.2025141E+02 -2.1995607E+02
 -2.1966016E+02 -2.1936367E+02 -2.1906662E+02 -2.1876899E+02
 -2.1847082E+02 -2.1817208E+02 -2.1787278E+02 -2.1757293E+02
 -2.1727254E+02 -2.1697160E+02 -2.1667013E+02 -2.1636811E+02
 -2.1606556E+02 -2.1576248E+02 -2.1545888E+02 -2.1515475E+02
 -2.1485011E+02 -2.1454494E+02 -2.1423927E+02 -2.1393309E+02
 -2.1362640E+02 -2.1331922E+02 -2.1301153E+02 -2.1270335E+02
 -2.1239468E+02 -2.1208552E+02 -2.1177588E+02 -2.1146576E+02
 -2.1115516E+02 -2.1084410E+02 -2.1053255E+02 -2.1022055E+02
 -2.0990808E+02 -2.0959516E+02 -2.0928178E+02 -2.0896795E+02
 -2.0865367E+02 -2.0833895E+02 -2.0802378E+02 -2.0770818E+02
 -2.0739215E+02 -2.0707568E+02 -2.0675879E+02 -2.0644148E+02
 -2.0612374E+02 -2.0580560E+02 -2.0548703E+02 -2.0516806E+02
 -2.0484869E+02 -2.0452891E+02 -2.0420873E+02 -2.0388817E+02
 -2.0356721E+02 -2.0324586E+02 -2.0292413E+02 -2.0260202E+02
 -2.0227954E+02 -2.0195668E+02 -2.0163344E+02 -2.0130985E+02
 -2.0098589E+02 -2.0066158E+02 -2.0033690E+02 -2.0001188E+02
 -1.9968651E+02 -1.9936080E+02 -1.9903475E+02 -1.9870835E+02
 -1.9838162E+02 -1.9805456E+02 -1.9772718E+02 -1.9739948E+02
 -1.9707145E+02 -1.9674311E+02 -1.9641445E+02 -1.9608548E+02
 -1.9575622E+02 -1.9542665E+02 -1.9509677E+02 -1.9476662E+02
 -1.9443616E+02 -1.9410542E+02 -1.9377439E+02 -1.9344308E+02
 -1.9311150E+02 -1.9277965E+02 -1.9244752E+02 -1.9211513E+02
 -1.9178247E+02 -1.9144956E+02 -1.9111639E+02 -1.9078297E+02
 -1.9044930E+02 -1.9011539E+02 -1.8978123E+02 -1.8944684E+02
 -1.8911222E+02 -1.8877736E+02 -1.8844228E+02 -1.8810697E+02
 -1.8777144E+02 -1.8743570E+02 -1.8709975E+02 -1.8676358E+02
 -1.8642721E+02 -1.8609064E+02 -1.8575387E+02 -1.8541691E+02
 -1.8507975E+02 -1.8474240E+02 -1.8440488E+02 -1.8406717E+02
 -1.8372929E+02 -1.8339122E+02 -1.8305300E+02 -1.8271460E+02
 -1.8237605E+02 -1.8203732E+02 -1.8169845E+02 -1.8135943E+02
 -1.8102026E+02 -1.8068094E+02 -1.8034148E+02 -1.8000188E+02
 -1.7966215E+02 -1.7932229E+02 -1.7898230E+02 -1.7864219E+02
 -1.7830196E+02 -1.7796161E+02 -1.7762114E+02 -1.7728058E+02
 -1.7693990E+02 -1.7659912E+02 -1.7625824E+02 -1.7591726E+02
 -1.7557620E+02 -1.7523505E+02 -1.7489381E+02 -1.7455250E+02
 -1.7421110E+02 -1.7386964E+02 -1.7352810E+02 -1.7318649E+02
 -1.7284483E+02 -1.7250310E+02 -1.7216132E+02 -1.7181948E+02
 -1.7147760E+02 -1.7113567E+02 -1.7079370E+02 -1.7045169E+02
 -1.7010965E+02 -1.6976757E+02 -1.6942547E+02 -1.6908335E+02
 -1.6874120E+02 -1.6839904E+02 -1.6805687E+02 -1.6771469E+02
 -1.6737249E+02 -1.6703030E+02 -1.6668811E+02 -1.6634592E+02
 -1.6600374E+02 -1.6566158E+02 -1.6531943E+02 -1.6497730E+02
 -1.6463519E+02 -1.6429310E+02 -1.6395105E+02 -1.6360903E+02
 -1.6326704E+02 -1.6292510E+02 -1.6258320E+02 -1.6224135E+02
 -1.6189955E+02 -1.6155781E+02 -1.6121612E+02 -1.6087449E+02
 -1.6053293E+02 -1.6019144E+02 -1.5985002E+02 -1.5950868E+02
 -1.5916742E+02 -1.5882623E+02 -1.5848514E+02 -1.5814414E+02
 -1.5780323E+02 -1.5746241E+02 -1.5712170E+02 -1.5678110E+02
 -1.5644060E+02 -1.5610021E+02 -1.5575994E+02 -1.5541979E+02
 -1.5507976E+02 -1.5473985E+02 -1.5440008E+02 -1.5406043E+02
 -1.5372092E+02 -1.5338156E+02 -1.5304234E+02 -1.5270326E+02
 -1.5236434E+02 -1.5202557E+02 -1.5168696E+02 -1.5134851E+02
 -1.5101023E+02 -1.5067211E+02 -1.5033416E+02 -1.4999640E+02
 -1.4965881E+02 -1.4932140E+02 -1.4898419E+02 -1.4864716E+02
 -1.4831032E+02 -1.4797368E+02 -1.4763725E+02 -1.4730101E+02
 -1.4696498E+02 -1.4662917E+02 -1.4629357E+02 -1.4595819E+02
 -1.4562303E+02 -1.4528810E+02 -1.4495339E+02 -1.4461892E+02
 -1.4428469E+02 -1.4395070E+02 -1.4361695E+02 -1.4328344E+02
 -1.4295019E+02 -1.4261719E+02 -1.4228445E+02 -1.4195197E+02
 -1.4161976E+02 -1.4128781E+02 -1.4095613E+02 -1.4062473E+02
 -1.4029361E+02 -1.3996277E+02 -1.3963223E+02 -1.3930196E+02
 -1.3897199E+02 -1.3864232E+02 -1.3831295E+02 -1.3798389E+02
 -1.3765513E+02 -1.3732668E+02 -1.3699855E+02 -1.3667074E+02
 -1.3634324E+02 -1.3601608E+02 -1.3568924E+02 -1.3536273E+02
 -1.3503656E+02 -1.3471073E+02 -1.3438525E+02 -1.3406011E+02
 -1.3373532E+02 -1.3341089E+02 -1.3308680E+02 -1.3276309E+02
 -1.3243974E+02 -1.3211675E+02 -1.3179414E+02 -1.3147190E+02
 -1.3115005E+02 -1.3082858E+02 -1.3050749E+02 -1.3018679E+02
 -1.2986648E+02 -1.2954657E+02 -1.2922706E+02 -1.2890795E+02
 -1.2858926E+02 -1.2827097E+02 -1.2795310E+02 -1.2763564E+02
 -1.2731861E+02 -1.2700200E+02 -1.2668582E+02 -1.2637007E+02
 -1.2605477E+02 -1.2573989E+02 -1.2542546E+02 -1.2511148E+02
 -1.2479795E+02 -1.2448487E+02 -1.2417226E+02 -1.2386010E+02
 -1.2354840E+02 -1.2323717E+02 -1.2292642E+02 -1.2261614E+02
 -1.2230634E+02 -1.2199702E+02 -1.2168818E+02 -1.2137984E+02
 -1.2107199E+02 -1.2076463E+02 -1.2045778E+02 -1.2015143E+02
 -1.1984558E+02 -1.1954025E+02 -1.1923544E+02 -1.1893113E+02
 -1.1862735E+02 -1.1832410E+02 -1.1802137E+02 -1.1771918E+02
 -1.1741752E+02 -1.1711640E+02 -1.1681583E+02 -1.1651580E+02
 -1.1621632E+02 -1.1591739E+02 -1.1561903E+02 -1.1532122E+02
 -1.1502397E+02 -1.1472729E+02 -1.1443119E+02 -1.1413566E+02
 -1.1384071E+02 -1.1354633E+02 -1.1325255E+02 -1.1295936E+02
 -1.1266676E+02 -1.1237475E+02 -1.1208335E+02 -1.1179254E+02
 -1.1150234E+02 -1.1121276E+02 -1.1092379E+02 -1.1063543E+02
 -1.1034770E+02 -1.1006060E+02 -1.0977411E+02 -1.0948826E+02
 -1.0920305E+02 -1.0891848E+02 -1.0863455E+02 -1.0835127E+02
 -1.0806863E+02 -1.0778666E+02 -1.0750533E+02 -1.0722467E+02
 -1.0694466E+02 -1.0666533E+02 -1.0638667E+02 -1.0610868E+02
 -1.0583138E+02 -1.0555475E+02 -1.0527881E+02 -1.0500356E+02
 -1.0472900E+02 -1.0445513E+02 -1.0418197E+02 -1.0390951E+02
 -1.0363775E+02 -1.0336671E+02 -1.0309638E+02 -1.0282676E+02
 -1.0255787E+02 -1.0228971E+02 -1.0202227E+02 -1.0175556E+02
 -1.0148959E+02 -1.0122436E+02 -1.0095986E+02 -1.0069612E+02
 -1.0043312E+02 -1.0017088E+02 -9.9909398E+01 -9.9648668E+01
 -9.9388710E+01 -9.9129510E+01 -9.8871090E+01 -9.8613443E+01
 -9.8359380E+01 -9.8103293E+01 -9.7847978E+01 -9.7593443E+01
 -9.7339680E+01 -9.7086683E+01 -9.6834458E+01 -9.6582990E+01
 -9.6332288E+01 -9.6082350E+01 -9.5833163E+01 -9.5584725E+01
 -9.5337045E+01 -9.5090115E+01 -9.4843928E+01 -9.4598483E+01
 -9.4353773E+01 -9.4109813E+01 -9.3866580E+01 -9.3624083E+01
 -9.3382320E+01 -9.3141278E+01 -9.2900963E+01 -9.2661375E+01
 -9.2422508E+01 -9.2184353E+01 -9.1946918E+01 -9.1710195E+01
 -9.1474185E+01 -9.1238880E+01 -9.1004288E+01 -9.0770393E+01
 -9.0537195E+01 -9.0304703E+01 -9.0072908E+01 -8.9841803E+01
 -8.9611388E+01 -8.9381663E+01 -8.9152628E+01 -8.8924275E+01
 -8.8696605E+01 -8.8469618E+01 -8.8243305E+01 -8.8017668E+01
 -8.7792698E+01 -8.7568403E+01 -8.7344775E+01 -8.7121815E+01
 -8.6899523E+01 -8.6677883E+01 -8.6456910E+01 -8.6236590E+01
 -8.6016930E+01 -8.5797915E+01 -8.5579553E+01 -8.5361843E+01
 -8.5144770E+01 -8.4928350E+01 -8.4712568E+01 -8.4497423E+01
 -8.4282915E+01 -8.4069045E+01 -8.3855813E+01 -8.3643203E+01
 -8.3431223E+01 -8.3219873E+01 -8.3009145E+01 -8.2799040E+01
 -8.2589558E+01 -8.2380690E+01 -8.2172438E+01 -8.1964800E+01
 -8.1757770E+01 -8.1551355E+01 -8.1345548E+01 -8.1140348E+01
 -8.0935748E+01 -8.0731755E+01 -8.0528355E+01 -8.0325555E+01
 -8.0123355E+01 -7.9921740E+01 -7.9720725E+01 -7.9520295E+01
 -7.9320450E+01 -7.9121198E+01 -7.8922523E+01 -7.8724433E+01
 -7.8526928E+01 -7.8329993E+01 -7.8133635E+01 -7.7937855E+01
 -7.7742645E+01 -7.7548005E+01 -7.7353928E+01 -7.7160420E+01
 -7.6967483E+01 -7.6775108E+01 -7.6583288E+01 -7.6392030E+01
 -7.6201328E+01 -7.6011180E+01 -7.5821588E+01 -7.5632543E+01
 -7.5444053E+01 -7.5256110E+01 -7.5068708E+01 -7.4881854E+01
 -7.4695543E+01 -7.4509772E+01 -7.4324539E+01 -7.4139844E+01
 -7.3955684E+01 -7.3772057E+01 -7.3588961E+01 -7.3406396E+01
 -7.3224360E+01 -7.3042850E+01 -7.2861863E+01 -7.2681401E+01
 -7.2501459E+01 -7.2322037E+01 -7.2143133E+01 -7.1964746E+01
 -7.1786872E+01 -7.1609511E+01 -7.1432661E+01 -7.1256320E+01
 -7.1080487E+01 -7.0905161E+01 -7.0730338E+01 -7.0556018E+01
 -7.0382199E+01 -7.0208879E+01 -7.0036058E+01 -6.9863732E+01
 -6.9691901E+01 -6.9520562E+01 -6.9349715E+01 -6.9179358E+01
 -6.9009488E+01 -6.8840105E+01 -6.8671208E+01 -6.8502793E+01
 -6.8334860E+01 -6.8167406E+01 -6.8000432E+01 -6.7833934E+01
 -6.7667912E+01 -6.7502363E+01 -6.7337288E+01 -6.7172682E+01
 -6.7008546E+01 -6.6844878E+01 -6.6681676E+01 -6.6518939E+01
 -6.6356664E+01 -6.6194852E+01 -6.6033500E+01 -6.5872606E+01
 -6.5712169E+01 -6.5552189E+01 -6.5392661E+01 -6.5233588E+01
 -6.5074965E+01 -6.4916792E+01 -6.4759068E+01 -6.4601790E+01
 -6.4444958E+01 -6.4288570E+01 -6.4132625E+01 -6.3977120E+01
 -6.3822056E+01 -6.3667429E+01 -6.3513240E+01 -6.3359486E+01
 -6.3206166E+01 -6.3053279E+01 -6.2900822E+01 -6.2748797E+01
 -6.2597199E+01 -6.2446028E+01 -6.2295284E+01 -6.2144963E+01
 -6.1995066E+01 -6.1845590E+01 -6.1696535E+01 -6.1547899E+01
 -6.1399680E+01 -6.1251877E+01 -6.1104490E+01 -6.0957515E+01
 -6.0810954E+01 -6.0664803E+01 -6.0519062E+01 -6.0373729E+01
 -6.0228803E+01 -6.0084283E+01 -5.9940167E+01 -5.9796455E+01
 -5.9653144E+01 -5.9510234E+01 -5.9367722E+01 -5.9225609E+01
 -5.9083893E+01 -5.8942572E+01 -5.8801646E+01 -5.8661112E+01
 -5.8520970E+01 -5.8381219E+01 -5.8241856E+01 -5.8102882E+01
 -5.7964295E+01 -5.7826092E+01 -5.7688274E+01 -5.7550840E+01
 -5.7413787E+01 -5.7277115E+01 -5.7140822E+01 -5.7004907E+01
 -5.6869370E+01 -5.6734208E+01 -5.6599421E+01 -5.6465006E+01
 -5.6330965E+01 -5.6197295E+01 -5.6063994E+01 -5.5931063E+01
 -5.5798498E+01 -5.5666301E+01 -5.5534468E+01 -5.5403000E+01
 -5.5271894E+01 -5.5141151E+01 -5.5010768E+01 -5.4880744E+01
 -5.4751079E+01 -5.4621771E+01 -5.4492820E+01 -5.4364223E+01
 -5.4235980E+01 -5.4108091E+01 -5.3980553E+01 -5.3853365E+01
 -5.3726527E+01 -5.3600037E+01 -5.3473895E+01 -5.3348099E+01
 -5.3222648E+01 -5.3097540E+01 -5.2972776E+01 -5.2848354E+01
 -5.2724273E+01 -5.2600531E+01 -5.2477128E+01 -5.2354063E+01
 -5.2231334E+01 -5.2108941E+01 -5.1986882E+01 -5.1865157E+01
 -5.1743764E+01 -5.1622702E+01 -5.1501971E+01 -5.1381569E+01
 -5.1261495E+01 -5.1141749E+01 -5.1022328E+01 -5.0903234E+01
 -5.0784463E+01 -5.0666015E+01 -5.0547890E+01 -5.0430085E+01
 -5.0312601E+01 -5.0195436E+01 -5.0078589E+01 -4.9962059E+01
 -4.9845846E+01 -4.9729949E+01 -4.9614365E+01 -4.9499094E+01
 -4.9384136E+01 -4.9269489E+01 -4.9155152E+01 -4.9041125E+01
 -4.8927407E+01 -4.8813996E+01 -4.8700892E+01 -4.8588093E+01
 -4.8475599E+01 -4.8363409E+01 -4.8251521E+01 -4.8139935E+01
 -4.8028651E+01 -4.7917666E+01 -4.7806980E+01 -4.7696593E+01
 -4.7586503E+01 -4.7476709E+01 -4.7367210E+01 -4.7258006E+01
 -4.7149097E+01 -4.7040479E+01 -4.6932153E+01 -4.6824118E+01
 -4.6716374E+01 -4.6608917E+01 -4.6501750E+01 -4.6394870E+01
 -4.6288277E+01 -4.6181969E+01 -4.6075946E+01 -4.5970206E+01
 -4.5864749E+01 -4.5759575E+01 -4.5654683E+01 -4.5550070E+01
 -4.5445737E+01 -4.5341683E+01 -4.5237906E+01 -4.5134407E+01
 -4.5031184E+01 -4.4928236E+01 -4.4825562E+01 -4.4723162E+01
 -4.4621035E+01 -4.4519180E+01 -4.4417596E+01 -4.4316282E+01
 -4.4215238E+01 -4.4114463E+01 -4.4013956E+01 -4.3913715E+01
 -4.3813741E+01 -4.3714031E+01 -4.3614587E+01 -4.3515407E+01
 -4.3416490E+01 -4.3317835E+01 -4.3219441E+01 -4.3121308E+01
 -4.3023435E+01 -4.2925820E+01 -4.2828465E+01 -4.2731366E+01
 -4.2634525E+01 -4.2537939E+01 -4.2441609E+01 -4.2345533E+01
 -4.2249710E+01 -4.2154141E+01 -4.2058823E+01 -4.1963757E+01
 -4.1868942E+01 -4.1774376E+01 -4.1680060E+01 -4.1585992E+01
 -4.1492171E+01 -4.1398598E+01 -4.1305270E+01 -4.1212187E+01
 -4.1119350E+01 -4.1026756E+01 -4.0934405E+01 -4.0842297E+01
 -4.0750431E+01 -4.0658806E+01 -4.0567421E+01 -4.0476275E+01
 -4.0385368E+01 -4.0294699E+01 -4.0204268E+01 -4.0114073E+01
 -4.0024115E+01 -3.9934391E+01 -3.9844902E+01 -3.9755648E+01
 -3.9666626E+01 -3.9577837E+01 -3.9489279E+01 -3.9400952E+01
 -3.9312857E+01 -3.9224990E+01 -3.9137353E+01 -3.9049944E+01
 -3.8962763E+01 -3.8875808E+01 -3.8789081E+01 -3.8702579E+01
 -3.8616301E+01 -3.8530248E+01 -3.8444419E+01 -3.8358812E+01
 -3.8273429E+01 -3.8188266E+01 -3.8103325E+01 -3.8018603E+01
 -3.7934102E+01 -3.7849820E+01 -3.7765756E+01 -3.7681910E+01
 -3.7598280E+01 -3.7514867E+01 -3.7431671E+01 -3.7348689E+01
 -3.7265922E+01 -3.7183369E+01 -3.7101029E+01 -3.7018901E+01
 -3.6936986E+01 -3.6855282E+01 -3.6773789E+01 -3.6692506E+01
 -3.6611432E+01 -3.6530568E+01 -3.6449912E+01 -3.6369464E+01
 -3.6289222E+01 -3.6209187E+01 -3.6129358E+01 -3.6049734E+01
 -3.5970314E+01 -3.5891099E+01 -3.5812088E+01 -3.5733278E+01
 -3.5654672E+01 -3.5576267E+01 -3.5498063E+01 -3.5420060E+01
 -3.5342256E+01 -3.5264652E+01 -3.5187247E+01 -3.5110040E+01
 -3.5033030E+01 -3.4956217E+01 -3.4879601E+01 -3.4803180E+01
 -3.4726955E+01 -3.4650924E+01 -3.4575088E+01 -3.4499445E+01
 -3.4423995E+01 -3.4348738E+01 -3.4273673E+01 -3.4198798E+01
 -3.4124115E+01 -3.4049621E+01 -3.3975318E+01 -3.3901204E+01
 -3.3827278E+01 -3.3753539E+01 -3.3679989E+01 -3.3606626E+01
 -3.3533449E+01 -3.3460457E+01 -3.3387651E+01 -3.3315030E+01
 -3.3242593E+01 -3.3170339E+01 -3.3098269E+01 -3.3026381E+01
 -3.2954676E+01 -3.2883152E+01 -3.2811809E+01 -3.2740647E+01
 -3.2669664E+01 -3.2598861E+01 -3.2528237E+01 -3.2457792E+01
 -3.2387525E+01 -3.2317434E+01 -3.2247521E+01 -3.2177784E+01
 -3.2108223E+01 -3.2038838E+01 -3.1969626E+01 -3.1900590E+01
 -3.1831727E+01 -3.1763039E+01 -3.1694522E+01 -3.1626178E+01
 -3.1558006E+01 -3.1490005E+01 -3.1422176E+01 -3.1354516E+01
 -3.1287026E+01 -3.1219706E+01 -3.1152555E+01 -3.1085573E+01
 -3.1018758E+01 -3.0952111E+01 -3.0885630E+01 -3.0819317E+01
 -3.0753169E+01 -3.0687187E+01 -3.0621370E+01 -3.0555717E+01
 -3.0490229E+01 -3.0424904E+01 -3.0359744E+01 -3.0294745E+01
 -3.0229909E+01 -3.0165234E+01 -3.0100721E+01 -3.0036369E+01
 -2.9972177E+01 -2.9908145E+01 -2.9844273E+01 -2.9780561E+01
 -2.9717006E+01 -2.9653610E+01 -2.9590371E+01 -2.9527290E+01
 -2.9464366E+01 -2.9401598E+01 -2.9338985E+01 -2.9276529E+01
 -2.9214227E+01 -2.9152080E+01 -2.9090088E+01 -2.9028249E+01
 -2.8966563E+01 -2.8905030E+01 -2.8843650E+01 -2.8782422E+01
 -2.8721345E+01 -2.8660419E+01 -2.8599644E+01 -2.8539020E+01
 -2.8478546E+01 -2.8418220E+01 -2.8358044E+01 -2.8298016E+01
 -2.8238137E+01 -2.8178405E+01 -2.8118821E+01 -2.8059383E+01
 -2.8000093E+01 -2.7940948E+01 -2.7881949E+01 -2.7823096E+01
 -2.7764387E+01 -2.7705822E+01 -2.7647402E+01 -2.7589125E+01
 -2.7530992E+01 -2.7473002E+01 -2.7415154E+01 -2.7357448E+01
 -2.7299883E+01 -2.7242460E+01 -2.7185178E+01 -2.7128036E+01
 -2.7071035E+01 -2.7014173E+01 -2.6957450E+01 -2.6900867E+01
 -2.6844421E+01 -2.6788114E+01 -2.6731945E+01 -2.6675913E+01
 -2.6620018E+01 -2.6564259E+01 -2.6508637E+01 -2.6453150E+01
 -2.6397800E+01 -2.6342584E+01 -2.6287502E+01 -2.6232556E+01
 -2.6177743E+01 -2.6123063E+01 -2.6068517E+01 -2.6014104E+01
 -2.5959824E+01 -2.5905674E+01 -2.5851657E+01 -2.5797772E+01
 -2.5744017E+01 -2.5690393E+01 -2.5636899E+01 -2.5583535E+01
 -2.5530301E+01 -2.5477196E+01 -2.5424219E+01 -2.5371372E+01
 -2.5318652E+01 -2.5266060E+01 -2.5213595E+01 -2.5161258E+01
 -2.5109048E+01 -2.5056963E+01 -2.5005005E+01 -2.4953171E+01
 -2.4901464E+01 -2.4849882E+01 -2.4798424E+01 -2.4747090E+01
 -2.4695881E+01 -2.4644795E+01 -2.4593831E+01 -2.4542992E+01
 -2.4492275E+01 -2.4441679E+01 -2.4391206E+01 -2.4340854E+01
 -2.4290624E+01 -2.4240514E+01 -2.4190525E+01 -2.4140657E+01
 -2.4090908E+01 -2.4041278E+01 -2.3991768E+01 -2.3942377E+01
 -2.3893104E+01 -2.3843950E+01 -2.3794913E+01 -2.3745995E+01
 -2.3697194E+01 -2.3648509E+01 -2.3599941E+01 -2.3551490E+01
 -2.3503154E+01 -2.3454934E+01 -2.3406830E+01 -2.3358840E+01
 -2.3310965E+01 -2.3263205E+01 -2.3215559E+01 -2.3168027E+01
 -2.3120609E+01 -2.3073303E+01 -2.3026110E+01 -2.2979030E+01
 -2.2932062E+01 -2.2885206E+01 -2.2838462E+01 -2.2791829E+01
 -2.2745307E+01 -2.2698896E+01 -2.2652596E+01 -2.2606405E+01
 -2.2560324E+01 -2.2514354E+01 -2.2468491E+01 -2.2422739E+01
 -2.2377095E+01 -2.2331558E+01 -2.2286131E+01 -2.2240811E+01
 -2.2195598E+01 -2.2150493E+01 -2.2105494E+01 -2.2060602E+01
 -2.2015817E+01 -2.1971138E+01 -2.1926564E+01 -2.1882095E+01
 -2.1837732E+01 -2.1793474E+01 -2.1749321E+01 -2.1705272E+01
 -2.1661326E+01 -2.1617485E+01 -2.1573747E+01 -2.1530112E+01
 -2.1486581E+01 -2.1443151E+01 -2.1399824E+01 -2.1356600E+01
 -2.1313477E+01 -2.1270455E+01 -2.1227536E+01 -2.1184717E+01
 -2.1141998E+01 -2.1099380E+01 -2.1056863E+01 -2.1014445E+01
 -2.0972127E+01 -2.0929908E+01 -2.0887789E+01 -2.0845768E+01
 -2.0803846E+01 -2.0762022E+01 -2.0720297E+01 -2.0678669E+01
 -2.0637138E+01 -2.0595705E+01 -2.0554369E+01 -2.0513130E+01
 -2.0471987E+01 -2.0430941E+01 -2.0389990E+01 -2.0349135E+01
 -2.0308376E+01 -2.0267711E+01 -2.0227142E+01 -2.0186668E+01
 -2.0146288E+01 -2.0106002E+01 -2.0065810E+01 -2.0025712E+01
 -1.9985707E+01 -1.9945796E+01 -1.9905977E+01 -1.9866251E+01
 -1.9826618E+01 -1.9787076E+01 -1.9747627E+01 -1.9708270E+01
 -1.9669004E+01 -1.9629829E+01 -1.9590745E+01 -1.9551752E+01
 -1.9512850E+01 -1.9474037E+01 -1.9435315E+01 -1.9396683E+01
 -1.9358140E+01 -1.9319687E+01 -1.9281322E+01 -1.9243046E+01
 -1.9204859E+01 -1.9166761E+01 -1.9128751E+01 -1.9090828E+01
 -1.9052993E+01 -1.9015246E+01 -1.8977585E+01 -1.8940013E+01
 -1.8902526E+01 -1.8865127E+01 -1.8827813E+01 -1.8790585E+01
 -1.8753443E+01 -1.8716387E+01 -1.8679417E+01 -1.8642531E+01
 -1.8605731E+01 -1.8569015E+01 -1.8532384E+01 -1.8495837E+01
 -1.8459374E+01 -1.8422995E+01 -1.8386699E+01 -1.8350487E+01
 -1.8314358E+01 -1.8278312E+01 -1.8242349E+01 -1.8206468E+01
 -1.8170670E+01 -1.8134954E+01 -1.8099320E+01 -1.8063767E+01
 -1.8028295E+01 -1.7992905E+01 -1.7957596E+01 -1.7922368E+01
 -1.7887220E+01 -1.7852153E+01 -1.7817166E+01 -1.7782259E+01
 -1.7747432E+01 -1.7712684E+01 -1.7678015E+01 -1.7643426E+01
 -1.7608916E+01 -1.7574484E+01 -1.7540131E+01 -1.7505856E+01
 -1.7471660E+01 -1.7437541E+01 -1.7403500E+01 -1.7369536E+01
 -1.7335650E+01 -1.7301841E+01 -1.7268108E+01 -1.7234453E+01
 -1.7200874E+01 -1.7167371E+01 -1.7133944E+01 -1.7100593E+01
 -1.7067319E+01 -1.7034119E+01 -1.7000995E+01 -1.6967946E+01
 -1.6934972E+01 -1.6902072E+01 -1.6869248E+01 -1.6836497E+01
 -1.6803821E+01 -1.6771218E+01 -1.6738690E+01 -1.6706234E+01
 -1.6673853E+01 -1.6641545E+01 -1.6609309E+01 -1.6577147E+01
 -1.6545056E+01 -1.6513039E+01 -1.6481094E+01 -1.6449221E+01
 -1.6417419E+01 -1.6385690E+01 -1.6354031E+01 -1.6322445E+01
 -1.6290929E+01 -1.6259485E+01 -1.6228111E+01 -1.6196808E+01
 -1.6165575E+01 -1.6134413E+01 -1.6103320E+01 -1.6072298E+01
 -1.6041344E+01 -1.6010461E+01 -1.5979647E+01 -1.5948902E+01
 -1.5918227E+01 -1.5887619E+01 -1.5857081E+01 -1.5826611E+01
 -1.5796209E+01 -1.5765875E+01 -1.5735610E+01 -1.5705412E+01
 -1.5675282E+01 -1.5645219E+01 -1.5615224E+01 -1.5585295E+01
 -1.5555433E+01 -1.5525638E+01 -1.5495910E+01 -1.5466248E+01
 -1.5436652E+01 -1.5407123E+01 -1.5377659E+01 -1.5348260E+01
 -1.5318928E+01 -1.5289661E+01 -1.5260459E+01 -1.5231322E+01
 -1.5202250E+01 -1.5173243E+01 -1.5144300E+01 -1.5115421E+01
 -1.5086607E+01 -1.5057857E+01 -1.5029171E+01 -1.5000548E+01
 -1.4971990E+01 -1.4943494E+01 -1.4915062E+01 -1.4886693E+01
 -1.4858387E+01 -1.4830144E+01 -1.4801963E+01 -1.4773844E+01
 -1.4745788E+01 -1.4717795E+01 -1.4689862E+01 -1.4661992E+01
 -1.4634184E+01 -1.4606437E+01 -1.4578751E+01 -1.4551127E+01
 -1.4523564E+01 -1.4496062E+01 -1.4468620E+01 -1.4441239E+01
 -1.4413918E+01 -1.4386658E+01 -1.4359457E+01 -1.4332317E+01
 -1.4305237E+01 -1.4278216E+01 -1.4251255E+01 -1.4224353E+01
 -1.4197511E+01 -1.4170727E+01 -1.4144003E+01 -1.4117336E+01
 -1.4090729E+01 -1.4064181E+01 -1.4037690E+01 -1.4011258E+01
 -1.3984884E+01 -1.3958568E+01 -1.3932309E+01 -1.3906109E+01
 -1.3879965E+01 -1.3853879E+01 -1.3827850E+01 -1.3801878E+01
 -1.3775963E+01 -1.3750105E+01 -1.3724303E+01 -1.3698558E+01
 -1.3672870E+01 -1.3647237E+01 -1.3621661E+01 -1.3596140E+01
 -1.3570675E+01 -1.3545266E+01 -1.3519912E+01 -1.3494614E+01
 -1.3469370E+01 -1.3444182E+01 -1.3419049E+01 -1.3393970E+01
 -1.3368947E+01 -1.3343978E+01 -1.3319063E+01 -1.3294202E+01
 -1.3269395E+01 -1.3244643E+01 -1.3219944E+01 -1.3195299E+01
 -1.3170708E+01 -1.3146170E+01 -1.3121686E+01 -1.3097255E+01
 -1.3072876E+01 -1.3048550E+01 -1.3024278E+01 -1.3000058E+01
 -1.2975890E+01 -1.2951776E+01 -1.2927713E+01 -1.2903702E+01
 -1.2879743E+01 -1.2855837E+01 -1.2831982E+01 -1.2808178E+01
 -1.2784427E+01 -1.2760727E+01 -1.2737077E+01 -1.2713479E+01
 -1.2689932E+01 -1.2666436E+01 -1.2642990E+01 -1.2619595E+01
 -1.2596251E+01 -1.2572957E+01 -1.2549713E+01 -1.2526520E+01
 -1.2503375E+01 -1.2480282E+01 -1.2457238E+01 -1.2434243E+01
 -1.2411299E+01 -1.2388403E+01 -1.2365557E+01 -1.2342760E+01
 -1.2320012E+01 -1.2297312E+01 -1.2274661E+01 -1.2252060E+01
 -1.2229507E+01 -1.2207002E+01 -1.2184545E+01 -1.2162137E+01
 -1.2139777E+01 -1.2117464E+01 -1.2095200E+01 -1.2072983E+01
 -1.2050814E+01 -1.2028692E+01 -1.2006617E+01 -1.1984591E+01
 -1.1962610E+01 -1.1940677E+01 -1.1918792E+01 -1.1896952E+01
 -1.1875160E+01 -1.1853413E+01 -1.1831714E+01 -1.1810060E+01
 -1.1788454E+01 -1.1766893E+01 -1.1745378E+01 -1.1723909E+01
 -1.1702486E+01 -1.1681108E+01 -1.1659775E+01 -1.1638489E+01
 -1.1617247E+01 -1.1596052E+01 -1.1574900E+01 -1.1553794E+01
 -1.1532734E+01 -1.1511717E+01 -1.1490745E+01 -1.1469818E+01
 -1.1448935E+01 -1.1428097E+01 -1.1407303E+01 -1.1386553E+01
 -1.1365847E+01 -1.1345185E+01 -1.1324567E+01 -1.1303992E+01
 -1.1283461E+01 -1.1262974E+01 -1.1242530E+01 -1.1222129E+01
 -1.1201771E+01 -1.1181457E+01 -1.1161185E+01 -1.1140957E+01
 -1.1120771E+01 -1.1100627E+01 -1.1080526E+01 -1.1060468E+01
 -1.1040452E+01 -1.1020479E+01 -1.1000547E+01 -1.0980658E+01
 -1.0960811E+01 -1.0941005E+01 -1.0921241E+01 -1.0901519E+01
 -1.0881838E+01 -1.0862198E+01 -1.0842600E+01 -1.0823043E+01
 -1.0803528E+01 -1.0784053E+01 -1.0764620E+01 -1.0745227E+01
 -1.0725875E+01 -1.0706564E+01 -1.0687292E+01 -1.0668062E+01
 -1.0648872E+01 -1.0629722E+01 -1.0610612E+01 -1.0591543E+01
 -1.0572514E+01 -1.0553524E+01 -1.0534574E+01 -1.0515664E+01
 -1.0496793E+01 -1.0477962E+01 -1.0459170E+01 -1.0440418E+01
 -1.0421705E+01 -1.0403030E+01 -1.0384395E+01 -1.0365800E+01
 -1.0347242E+01 -1.0328723E+01 -1.0310243E+01 -1.0291802E+01
 -1.0273400E+01 -1.0255035E+01 -1.0236709E+01 -1.0218421E+01
 -1.0200171E+01 -1.0181959E+01 -1.0163785E+01 -1.0145649E+01
 -1.0127550E+01 -1.0109489E+01 -1.0091467E+01 -1.0073481E+01
 -1.0055533E+01 -1.0037621E+01 -1.0019748E+01 -1.0001911E+01
 -9.9841118E+00 -9.9663488E+00 -9.9486233E+00 -9.9309338E+00
 -9.9132818E+00 -9.8956658E+00 -9.8780865E+00 -9.8605433E+00
 -9.8430368E+00 -9.8255670E+00 -9.8081325E+00 -9.7907348E+00
 -9.7733730E+00 -9.7560465E+00 -9.7387560E+00 -9.7215015E+00
 -9.7042830E+00 -9.6870998E+00 -9.6699518E+00 -9.6528390E+00
 -9.6357623E+00 -9.6187200E+00 -9.6017138E+00 -9.5847420E+00
 -9.5678055E+00 -9.5509035E+00 -9.5340368E+00 -9.5172045E+00
 -9.5004068E+00 -9.4836443E+00 -9.4669155E+00 -9.4502213E+00
 -9.4335615E+00 -9.4169363E+00 -9.4003448E+00 -9.3837878E+00
 -9.3672645E+00 -9.3507750E+00 -9.3343200E+00 -9.3178980E+00
 -9.3015105E+00 -9.2851560E+00 -9.2688353E+00 -9.2525483E+00
 -9.2362943E+00 -9.2200733E+00 -9.2038860E+00 -9.1877318E+00
 -9.1716105E+00 -9.1555223E+00 -9.1394670E+00 -9.1234448E+00
 -9.1074548E+00 -9.0914985E+00 -9.0755738E+00 -9.0596820E+00
 -9.0438225E+00 -9.0279953E+00 -9.0122010E+00 -8.9964383E+00
 -8.9807078E+00 -8.9650095E+00 -8.9493435E+00 -8.9337090E+00
 -8.9181068E+00 -8.9025360E+00 -8.8869968E+00 -8.8714898E+00
 -8.8560143E+00 -8.8405695E+00 -8.8251570E+00 -8.8097753E+00
 -8.7944250E+00 -8.7791063E+00 -8.7638183E+00 -8.7485610E+00
 -8.7333353E+00 -8.7181403E+00 -8.7029760E+00 -8.6878425E+00
 -8.6727398E+00 -8.6576678E+00 -8.6426265E+00 -8.6276153E+00
 -8.6126348E+00 -8.5976843E+00 -8.5827638E+00 -8.5678740E+00
 -8.5530143E+00 -8.5381845E+00 -8.5233855E+00 -8.5086158E+00
 -8.4938753E+00 -8.4791655E+00 -8.4644850E+00 -8.4498345E+00
 -8.4352133E+00 -8.4206213E+00 -8.4060593E+00 -8.3915265E+00
 -8.3770223E+00 -8.3625480E+00 -8.3481030E+00 -8.3336873E+00
 -8.3193000E+00 -8.3049420E+00 -8.2906125E+00 -8.2763123E+00
 -8.2620413E+00 -8.2477980E+00 -8.2335840E+00 -8.2193985E+00
 -8.2052408E+00 -8.1911123E+00 -8.1770123E+00 -8.1629400E+00
 -8.1488963E+00 -8.1348810E+00 -8.1208935E+00 -8.1069338E+00
 -8.0930025E+00 -8.0790990E+00 -8.0652233E+00 -8.0513753E+00
 -8.0375550E+00 -8.0237625E+00 -8.0099978E+00 -7.9962608E+00
 -7.9825508E+00 -7.9688685E+00 -7.9552133E+00 -7.9415858E+00
 -7.9279853E+00 -7.9144118E+00 -7.9008653E+00 -7.8873465E+00
 -7.8738540E+00 -7.8603885E+00 -7.8469500E+00 -7.8335385E+00
 -7.8201533E+00 -7.8067950E+00 -7.7934638E+00 -7.7801588E+00
 -7.7668800E+00 -7.7536275E+00 -7.7404020E+00 -7.7272028E+00
 -7.7140290E+00 -7.7008823E+00 -7.6877610E+00 -7.6746660E+00
 -7.6615973E+00 -7.6485548E+00 -7.6355378E+00 -7.6225463E+00
 -7.6095810E+00 -7.5966413E+00 -7.5837278E+00 -7.5708390E+00
 -7.5579765E+00 -7.5451395E+00 -7.5323273E+00 -7.5195405E+00
 -7.5067793E+00 -7.4940436E+00 -7.4813328E+00 -7.4686472E+00
 -7.4559867E+00 -7.4433512E+00 -7.4307407E+00 -7.4181551E+00
 -7.4055944E+00 -7.3930586E+00 -7.3805474E+00 -7.3680609E+00
 -7.3555991E+00 -7.3431618E+00 -7.3307491E+00 -7.3183608E+00
 -7.3059970E+00 -7.2936575E+00 -7.2813424E+00 -7.2690515E+00
 -7.2567848E+00 -7.2445421E+00 -7.2323237E+00 -7.2201293E+00
 -7.2079588E+00 -7.1958122E+00 -7.1836896E+00 -7.1715908E+00
 -7.1595157E+00 -7.1474643E+00 -7.1354366E+00 -7.1234325E+00
 -7.1114519E+00 -7.0994949E+00 -7.0875614E+00 -7.0756511E+00
 -7.0637643E+00 -7.0519007E+00 -7.0400604E+00 -7.0282433E+00
 -7.0164493E+00 -7.0046783E+00 -6.9929305E+00 -6.9812055E+00
 -6.9695036E+00 -6.9578245E+00 -6.9461682E+00 -6.9345347E+00
 -6.9229239E+00 -6.9113358E+00 -6.8997704E+00 -6.8882275E+00
 -6.8767071E+00 -6.8652092E+00 -6.8537337E+00 -6.8422806E+00
 -6.8308498E+00 -6.8194413E+00 -6.8080550E+00 -6.7966909E+00
 -6.7853489E+00 -6.7740290E+00 -6.7627310E+00 -6.7514552E+00
 -6.7402012E+00 -6.7289690E+00 -6.7177588E+00 -6.7065703E+00
 -6.6954035E+00 -6.6842585E+00 -6.6731351E+00 -6.6620332E+00
 -6.6509529E+00 -6.6398941E+00 -6.6288567E+00 -6.6178408E+00
 -6.6068462E+00 -6.5958728E+00 -6.5849208E+00 -6.5739899E+00
 -6.5630803E+00 -6.5521917E+00 -6.5413242E+00 -6.5304778E+00
 -6.5196523E+00 -6.5088477E+00 -6.4980641E+00 -6.4873012E+00
 -6.4765592E+00 -6.4658378E+00 -6.4551373E+00 -6.4444573E+00
 -6.4337980E+00 -6.4231592E+00 -6.4125410E+00 -6.4019432E+00
 -6.3913658E+00 -6.3808088E+00 -6.3702722E+00 -6.3597559E+00
 -6.3492598E+00 -6.3387839E+00 -6.3283282E+00 -6.3178926E+00
 -6.3074771E+00 -6.2970815E+00 -6.2867060E+00 -6.2763504E+00
 -6.2660147E+00 -6.2556989E+00 -6.2454029E+00 -6.2351266E+00
 -6.2248700E+00 -6.2146332E+00 -6.2044160E+00 -6.1942183E+00
 -6.1840402E+00 -6.1738817E+00 -6.1637425E+00 -6.1536228E+00
 -6.1435225E+00 -6.1334415E+00 -6.1233798E+00 -6.1133374E+00
 -6.1033142E+00 -6.0933101E+00 -6.0833252E+00 -6.0733593E+00
 -6.0634124E+00 -6.0534847E+00 -6.0435758E+00 -6.0336859E+00
 -6.0238148E+00 -6.0139626E+00 -6.0041291E+00 -5.9943145E+00
 -5.9845185E+00 -5.9747412E+00 -5.9649826E+00 -5.9552425E+00
 -5.9455210E+00 -5.9358179E+00 -5.9261334E+00 -5.9164673E+00
 -5.9068196E+00 -5.8971902E+00 -5.8875791E+00 -5.8779863E+00
 -5.8684118E+00 -5.8588554E+00 -5.8493172E+00 -5.8397971E+00
 -5.8302950E+00 -5.8208111E+00 -5.8113450E+00 -5.8018970E+00
 -5.7924668E+00 -5.7830546E+00 -5.7736601E+00 -5.7642835E+00
 -5.7549246E+00 -5.7455835E+00 -5.7362600E+00 -5.7269542E+00
 -5.7176660E+00 -5.7083954E+00 -5.6991422E+00 -5.6899067E+00
 -5.6806885E+00 -5.6714878E+00 -5.6623044E+00 -5.6531384E+00
 -5.6439897E+00 -5.6348582E+00 -5.6257441E+00 -5.6166470E+00
 -5.6075672E+00 -5.5985045E+00 -5.5894588E+00 -5.5804302E+00
 -5.5714186E+00 -5.5624240E+00 -5.5534463E+00 -5.5444856E+00
 -5.5355416E+00 -5.5266145E+00 -5.5177042E+00 -5.5088107E+00
 -5.4999338E+00 -5.4910737E+00 -5.4822302E+00 -5.4734033E+00
 -5.4645930E+00 -5.4557993E+00 -5.4470220E+00 -5.4382612E+00
 -5.4295169E+00 -5.4207889E+00 -5.4120773E+00 -5.4033821E+00
 -5.3947031E+00 -5.3860403E+00 -5.3773939E+00 -5.3687636E+00
 -5.3601494E+00 -5.3515514E+00 -5.3429695E+00 -5.3344036E+00
 -5.3258537E+00 -5.3173199E+00 -5.3088020E+00 -5.3003000E+00
 -5.2918138E+00 -5.2833435E+00 -5.2748891E+00 -5.2664504E+00
 -5.2580274E+00 -5.2496201E+00 -5.2412286E+00 -5.2328527E+00
 -5.2244924E+00 -5.2161476E+00 -5.2078185E+00 -5.1995048E+00
 -5.1912066E+00 -5.1829239E+00 -5.1746566E+00 -5.1664046E+00
 -5.1581681E+00 -5.1499468E+00 -5.1417407E+00 -5.1335500E+00
 -5.1253745E+00 -5.1172142E+00 -5.1090689E+00 -5.1009389E+00
 -5.0928239E+00 -5.0847240E+00 -5.0766391E+00 -5.0685692E+00
 -5.0605143E+00 -5.0524743E+00 -5.0444492E+00 -5.0364389E+00
 -5.0284436E+00 -5.0204630E+00 -5.0124971E+00 -5.0045460E+00
 -4.9966097E+00 -4.9886879E+00 -4.9807809E+00 -4.9728885E+00
 -4.9650107E+00 -4.9571474E+00 -4.9492986E+00 -4.9414643E+00
 -4.9336445E+00 -4.9258391E+00 -4.9180482E+00 -4.9102716E+00
 -4.9025093E+00 -4.8947614E+00 -4.8870278E+00 -4.8793083E+00
 -4.8716032E+00 -4.8639122E+00 -4.8562353E+00 -4.8485726E+00
 -4.8409241E+00 -4.8332895E+00 -4.8256691E+00 -4.8180626E+00
 -4.8104701E+00 -4.8028916E+00 -4.7953270E+00 -4.7877763E+00
 -4.7802395E+00 -4.7727164E+00 -4.7652072E+00 -4.7577119E+00
 -4.7502302E+00 -4.7427623E+00 -4.7353080E+00 -4.7278674E+00
 -4.7204405E+00 -4.7130272E+00 -4.7056274E+00 -4.6982412E+00
 -4.6908685E+00 -4.6835093E+00 -4.6761636E+00 -4.6688313E+00
 -4.6615124E+00 -4.6542070E+00 -4.6469148E+00 -4.6396360E+00
 -4.6323705E+00 -4.6251182E+00 -4.6178792E+00 -4.6106535E+00
 -4.6034409E+00 -4.5962414E+00 -4.5890552E+00 -4.5818819E+00
 -4.5747218E+00 -4.5675748E+00 -4.5604407E+00 -4.5533197E+00
 -4.5462116E+00 -4.5391164E+00 -4.5320342E+00 -4.5249649E+00
 -4.5179084E+00 -4.5108647E+00 -4.5038339E+00 -4.4968159E+00
 -4.4898106E+00 -4.4828180E+00 -4.4758382E+00 -4.4688710E+00
 -4.4619164E+00 -4.4549745E+00 -4.4480452E+00 -4.4411285E+00
 -4.4342243E+00 -4.4273326E+00 -4.4204534E+00 -4.4135867E+00
 -4.4067324E+00 -4.3998905E+00 -4.3930610E+00 -4.3862439E+00
 -4.3794392E+00 -4.3726467E+00 -4.3658665E+00 -4.3590986E+00
 -4.3523429E+00 -4.3455995E+00 -4.3388682E+00 -4.3321491E+00
 -4.3254421E+00 -4.3187472E+00 -4.3120645E+00 -4.3053938E+00
 -4.2987350E+00 -4.2920884E+00 -4.2854537E+00 -4.2788310E+00
 -4.2722202E+00 -4.2656213E+00 -4.2590344E+00 -4.2524592E+00
 -4.2458960E+00 -4.2393445E+00 -4.2328048E+00 -4.2262769E+00
 -4.2197607E+00 -4.2132563E+00 -4.2067635E+00 -4.2002825E+00
 -4.1938130E+00 -4.1873552E+00 -4.1809090E+00 -4.1744744E+00
 -4.1680513E+00 -4.1616397E+00 -4.1552396E+00 -4.1488511E+00
 -4.1424740E+00 -4.1361083E+00 -4.1297540E+00 -4.1234111E+00
 -4.1170796E+00 -4.1107593E+00 -4.1044505E+00 -4.0981529E+00
 -4.0918666E+00 -4.0855915E+00 -4.0793276E+00 -4.0730750E+00
 -4.0668335E+00 -4.0606033E+00 -4.0543841E+00 -4.0481760E+00
 -4.0419791E+00 -4.0357931E+00 -4.0296182E+00 -4.0234544E+00
 -4.0173016E+00 -4.0111597E+00 -4.0050287E+00 -3.9989087E+00
 -3.9927997E+00 -3.9867014E+00 -3.9806141E+00 -3.9745376E+00
 -3.9684719E+00 -3.9624170E+00 -3.9563729E+00 -3.9503396E+00
 -3.9443170E+00 -3.9383051E+00 -3.9323039E+00 -3.9263132E+00
 -3.9203333E+00 -3.9143641E+00 -3.9084053E+00 -3.9024572E+00
 -3.8965197E+00 -3.8905927E+00 -3.8846762E+00 -3.8787702E+00
 -3.8728747E+00 -3.8669896E+00 -3.8611149E+00 -3.8552507E+00
 -3.8493968E+00 -3.8435534E+00 -3.8377202E+00 -3.8318974E+00
 -3.8260849E+00 -3.8202827E+00 -3.8144907E+00 -3.8087090E+00
 -3.8029375E+00 -3.7971762E+00 -3.7914251E+00 -3.7856841E+00
 -3.7799533E+00 -3.7742326E+00 -3.7685220E+00 -3.7628215E+00
 -3.7571310E+00 -3.7514506E+00 -3.7457801E+00 -3.7401197E+00
 -3.7344693E+00 -3.7288288E+00 -3.7231982E+00 -3.7175777E+00
 -3.7119669E+00 -3.7063661E+00 -3.7007750E+00 -3.6951939E+00
 -3.6896225E+00 -3.6840610E+00 -3.6785093E+00 -3.6729672E+00
 -3.6674350E+00 -3.6619124E+00 -3.6563996E+00 -3.6508964E+00
 -3.6454029E+00 -3.6399190E+00 -3.6344447E+00 -3.6289801E+00
 -3.6235250E+00 -3.6180796E+00 -3.6126436E+00 -3.6072172E+00
 -3.6018002E+00 -3.5963928E+00 -3.5909948E+00 -3.5856064E+00
 -3.5802273E+00 -3.5748576E+00 -3.5694974E+00 -3.5641464E+00
 -3.5588049E+00 -3.5534727E+00 -3.5481498E+00 -3.5428362E+00
 -3.5375319E+00 -3.5322368E+00 -3.5269511E+00 -3.5216744E+00
 -3.5164071E+00 -3.5111489E+00 -3.5058999E+00 -3.5006600E+00
 -3.4954293E+00 -3.4902077E+00 -3.4849952E+00 -3.4797918E+00
 -3.4745975E+00 -3.4694121E+00 -3.4642358E+00 -3.4590686E+00
 -3.4539102E+00 -3.4487609E+00 -3.4436206E+00 -3.4384891E+00
 -3.4333666E+00 -3.4282530E+00 -3.4231483E+00 -3.4180524E+00
 -3.4129654E+00 -3.4078872E+00 -3.4028178E+00 -3.3977573E+00
 -3.3927054E+00 -3.3876624E+00 -3.3826281E+00 -3.3776025E+00
 -3.3725857E+00 -3.3675775E+00 -3.3625780E+00 -3.3575872E+00
 -3.3526049E+00 -3.3476314E+00 -3.3426664E+00 -3.3377100E+00
 -3.3327623E+00 -3.3278230E+00 -3.3228923E+00 -3.3179701E+00
 -3.3130564E+00 -3.3081512E+00 -3.3032544E+00 -3.2983661E+00
 -3.2934863E+00 -3.2886149E+00 -3.2837519E+00 -3.2788973E+00
 -3.2740510E+00 -3.2692131E+00 -3.2643836E+00 -3.2595623E+00
 -3.2547494E+00 -3.2499447E+00 -3.2451483E+00 -3.2403602E+00
 -3.2355803E+00 -3.2308087E+00 -3.2260452E+00 -3.2212900E+00
 -3.2165429E+00 -3.2118040E+00 -3.2070732E+00 -3.2023505E+00
 -3.1976360E+00 -3.1929296E+00 -3.1882312E+00 -3.1835409E+00
 -3.1788587E+00 -3.1741844E+00 -3.1695182E+00 -3.1648601E+00
 -3.1602098E+00 -3.1555676E+00 -3.1509333E+00 -3.1463069E+00
 -3.1416885E+00 -3.1370780E+00 -3.1324754E+00 -3.1278806E+00
 -3.1232937E+00 -3.1187147E+00 -3.1141434E+00 -3.1095800E+00
 -3.1050244E+00 -3.1004766E+00 -3.0959366E+00 -3.0914042E+00
 -3.0868797E+00 -3.0823628E+00 -3.0778538E+00 -3.0733523E+00
 -3.0688586E+00 -3.0643724E+00 -3.0598940E+00 -3.0554232E+00
 -3.0509600E+00 -3.0465044E+00 -3.0420565E+00 -3.0376160E+00
 -3.0331832E+00 -3.0287579E+00 -3.0243401E+00 -3.0199298E+00
 -3.0155270E+00 -3.0111318E+00 -3.0067440E+00 -3.0023636E+00
 -2.9979908E+00 -2.9936252E+00 -2.9892672E+00 -2.9849165E+00
 -2.9805733E+00 -2.9762373E+00 -2.9719088E+00 -2.9675876E+00
 -2.9632737E+00 -2.9589671E+00 -2.9546679E+00 -2.9503759E+00
 -2.9460912E+00 -2.9418137E+00 -2.9375435E+00 -2.9332806E+00
 -2.9290248E+00 -2.9247763E+00 -2.9205349E+00 -2.9163008E+00
 -2.9120737E+00 -2.9078538E+00 -2.9036411E+00 -2.8994354E+00
 -2.8952369E+00 -2.8910455E+00 -2.8868611E+00 -2.8826838E+00
 -2.8785135E+00 -2.8743503E+00 -2.8701941E+00 -2.8660450E+00
 -2.8619028E+00 -2.8577676E+00 -2.8536394E+00 -2.8495181E+00
 -2.8454038E+00 -2.8412963E+00 -2.8371959E+00 -2.8331023E+00
 -2.8290156E+00 -2.8249358E+00 -2.8208628E+00 -2.8167967E+00
 -2.8127375E+00 -2.8086850E+00 -2.8046393E+00 -2.8006005E+00
 -2.7965684E+00 -2.7925432E+00 -2.7885246E+00 -2.7845129E+00
 -2.7805078E+00 -2.7765095E+00 -2.7725178E+00 -2.7685329E+00
 -2.7645546E+00 -2.7605831E+00 -2.7566181E+00 -2.7526598E+00
 -2.7487082E+00 -2.7447632E+00 -2.7408247E+00 -2.7368929E+00
 -2.7329676E+00 -2.7290489E+00 -2.7251367E+00 -2.7212312E+00
 -2.7173321E+00 -2.7134395E+00 -2.7095534E+00 -2.7056739E+00
 -2.7018008E+00 -2.6979341E+00 -2.6940740E+00 -2.6902203E+00
 -2.6863730E+00 -2.6825321E+00 -2.6786976E+00 -2.6748695E+00
 -2.6710478E+00 -2.6672325E+00 -2.6634236E+00 -2.6596209E+00
 -2.6558246E+00 -2.6520347E+00 -2.6482510E+00 -2.6444736E+00
 -2.6407025E+00 -2.6369378E+00 -2.6331792E+00 -2.6294269E+00
 -2.6256809E+00 -2.6219410E+00 -2.6182073E+00 -2.6144799E+00
 -2.6107587E+00 -2.6070437E+00 -2.6033348E+00 -2.5996320E+00
 -2.5959354E+00 -2.5922450E+00 -2.5885606E+00 -2.5848824E+00
 -2.5812102E+00 -2.5775441E+00 -2.5738841E+00 -2.5702302E+00
 -2.5665824E+00 -2.5629405E+00 -2.5593047E+00 -2.5556750E+00
 -2.5520512E+00 -2.5484333E+00 -2.5448216E+00 -2.5412157E+00
 -2.5376159E+00 -2.5340219E+00 -2.5304339E+00 -2.5268519E+00
 -2.5232757E+00 -2.5197054E+00 -2.5161411E+00 -2.5125826E+00
 -2.5090300E+00 -2.5054832E+00 -2.5019423E+00 -2.4984073E+00
 -2.4948780E+00 -2.4913546E+00 -2.4878370E+00 -2.4843251E+00
 -2.4808191E+00 -2.4773189E+00 -2.4738243E+00 -2.4703355E+00
 -2.4668525E+00 -2.4633752E+00 -2.4599036E+00 -2.4564378E+00
 -2.4529776E+00 -2.4495231E+00 -2.4460743E+00 -2.4426311E+00
 -2.4391937E+00 -2.4357618E+00 -2.4323356E+00 -2.4289150E+00
 -2.4254999E+00 -2.4220906E+00 -2.4186868E+00 -2.4152885E+00
 -2.4118959E+00 -2.4085088E+00 -2.4051272E+00 -2.4017513E+00
 -2.3983808E+00 -2.3950158E+00 -2.3916563E+00 -2.3883023E+00
 -2.3849539E+00 -2.3816109E+00 -2.3782733E+00 -2.3749412E+00
 -2.3716146E+00 -2.3682935E+00 -2.3649776E+00 -2.3616673E+00
 -2.3583623E+00 -2.3550628E+00 -2.3517686E+00 -2.3484798E+00
 -2.3451964E+00 -2.3419183E+00 -2.3386455E+00 -2.3353781E+00
 -2.3321160E+00 -2.3288593E+00 -2.3256078E+00 -2.3223617E+00
 -2.3191208E+00 -2.3158852E+00 -2.3126548E+00 -2.3094297E+00
 -2.3062099E+00 -2.3029953E+00 -2.2997859E+00 -2.2965818E+00
 -2.2933828E+00 -2.2901891E+00 -2.2870005E+00 -2.2838171E+00
 -2.2806389E+00 -2.2774658E+00 -2.2742979E+00 -2.2711352E+00
 -2.2679775E+00 -2.2648250E+00 -2.2616776E+00 -2.2585352E+00
 -2.2553980E+00 -2.2522659E+00 -2.2491389E+00 -2.2460168E+00
 -2.2428999E+00 -2.2397880E+00 -2.2366811E+00 -2.2335793E+00
 -2.2304825E+00 -2.2273907E+00 -2.2243039E+00 -2.2212221E+00
 -2.2181452E+00 -2.2150733E+00 -2.2120064E+00 -2.2089445E+00
 -2.2058875E+00 -2.2028354E+00 -2.1997883E+00 -2.1967460E+00
 -2.1937087E+00 -2.1906763E+00 -2.1876487E+00 -2.1846260E+00
 -2.1816083E+00 -2.1785954E+00 -2.1755873E+00 -2.1725840E+00
 -2.1695857E+00 -2.1665921E+00 -2.1636034E+00 -2.1606194E+00
 -2.1576403E+00 -2.1546659E+00 -2.1516964E+00 -2.1487316E+00
 -2.1457715E+00 -2.1428163E+00 -2.1398657E+00 -2.1369200E+00
 -2.1339789E+00 -2.1310426E+00 -2.1281110E+00 -2.1251840E+00
 -2.1222619E+00 -2.1193443E+00 -2.1164315E+00 -2.1135233E+00
 -2.1106198E+00 -2.1077209E+00 -2.1048266E+00 -2.1019370E+00
 -2.0990521E+00 -2.0961718E+00 -2.0932960E+00 -2.0904249E+00
 -2.0875583E+00 -2.0846964E+00 -2.0818390E+00 -2.0789862E+00
 -2.0761379E+00 -2.0732942E+00 -2.0704551E+00 -2.0676205E+00
 -2.0647904E+00 -2.0619648E+00 -2.0591438E+00 -2.0563271E+00
 -2.0535151E+00 -2.0507075E+00 -2.0479044E+00 -2.0451058E+00
 -2.0423116E+00 -2.0395219E+00 -2.0367366E+00 -2.0339558E+00
 -2.0311793E+00 -2.0284073E+00 -2.0256398E+00 -2.0228765E+00
 -2.0201178E+00 -2.0173634E+00 -2.0146134E+00 -2.0118677E+00
 -2.0091265E+00 -2.0063896E+00 -2.0036570E+00 -2.0009288E+00
 -1.9982048E+00 -1.9954853E+00 -1.9927700E+00 -1.9900591E+00
 -1.9873525E+00 -1.9846501E+00 -1.9819520E+00 -1.9792583E+00
 -1.9765688E+00 -1.9738835E+00 -1.9712025E+00 -1.9685258E+00
 -1.9658532E+00 -1.9631849E+00 -1.9605209E+00 -1.9578611E+00
 -1.9552055E+00 -1.9525540E+00 -1.9499068E+00 -1.9472637E+00
 -1.9446249E+00 -1.9419902E+00 -1.9393597E+00 -1.9367333E+00
 -1.9341110E+00 -1.9314929E+00 -1.9288790E+00 -1.9262692E+00
 -1.9236635E+00 -1.9210619E+00 -1.9184644E+00 -1.9158710E+00
 -1.9132817E+00 -1.9106965E+00 -1.9081153E+00 -1.9055382E+00
 -1.9029652E+00 -1.9003962E+00 -1.8978313E+00 -1.8952704E+00
 -1.8927136E+00 -1.8901607E+00 -1.8876119E+00 -1.8850671E+00
 -1.8825263E+00 -1.8799895E+00 -1.8774566E+00 -1.8749278E+00
 -1.8724030E+00 -1.8698820E+00 -1.8673651E+00 -1.8648521E+00
 -1.8623431E+00 -1.8598379E+00 -1.8573368E+00 -1.8548395E+00
 -1.8523462E+00 -1.8498567E+00 -1.8473712E+00 -1.8448895E+00
 -1.8424118E+00 -1.8399380E+00 -1.8374680E+00 -1.8350018E+00
 -1.8325396E+00 -1.8300812E+00 -1.8276266E+00 -1.8251759E+00
 -1.8227290E+00 -1.8202859E+00 -1.8178467E+00 -1.8154112E+00
 -1.8129796E+00 -1.8105518E+00 -1.8081278E+00 -1.8057075E+00
 -1.8032910E+00 -1.8008783E+00 -1.7984694E+00 -1.7960642E+00
 -1.7936628E+00 -1.7912651E+00 -1.7888712E+00 -1.7864810E+00
 -1.7840945E+00 -1.7817117E+00 -1.7793327E+00 -1.7769573E+00
 -1.7745857E+00 -1.7722178E+00 -1.7698535E+00 -1.7674929E+00
 -1.7651360E+00 -1.7627827E+00 -1.7604331E+00 -1.7580872E+00
 -1.7557449E+00 -1.7534063E+00 -1.7510712E+00 -1.7487398E+00
 -1.7464121E+00 -1.7440879E+00 -1.7417673E+00 -1.7394504E+00
 -1.7371370E+00 -1.7348273E+00 -1.7325211E+00 -1.7302184E+00
 -1.7279195E+00 -1.7256239E+00 -1.7233320E+00 -1.7210437E+00
 -1.7187588E+00 -1.7164775E+00 -1.7141998E+00 -1.7119256E+00
 -1.7096549E+00 -1.7073877E+00 -1.7051240E+00 -1.7028638E+00
 -1.7006071E+00 -1.6983539E+00 -1.6961042E+00 -1.6938579E+00
 -1.6916151E+00 -1.6893758E+00 -1.6871399E+00 -1.6849076E+00
 -1.6826786E+00 -1.6804531E+00 -1.6782310E+00 -1.6760123E+00
 -1.6737971E+00 -1.6715853E+00 -1.6693769E+00 -1.6671719E+00
 -1.6649702E+00 -1.6627720E+00 -1.6605772E+00 -1.6583858E+00
 -1.6561976E+00 -1.6540130E+00 -1.6518316E+00 -1.6496536E+00
 -1.6474789E+00 -1.6453076E+00 -1.6431396E+00 -1.6409750E+00
 -1.6388137E+00 -1.6366557E+00 -1.6345010E+00 -1.6323497E+00
 -1.6302016E+00 -1.6280568E+00 -1.6259153E+00 -1.6237772E+00
 -1.6216423E+00 -1.6195106E+00 -1.6173823E+00 -1.6152572E+00
 -1.6131353E+00 -1.6110167E+00 -1.6089014E+00 -1.6067892E+00
 -1.6046804E+00 -1.6025747E+00 -1.6004723E+00 -1.5983731E+00
 -1.5962771E+00 -1.5941843E+00 -1.5920947E+00 -1.5900083E+00
 -1.5879251E+00 -1.5858451E+00 -1.5837683E+00 -1.5816946E+00
 -1.5796241E+00 -1.5775567E+00 -1.5754925E+00 -1.5734315E+00
 -1.5713736E+00 -1.5693188E+00 -1.5672672E+00 -1.5652187E+00
 -1.5631733E+00 -1.5611311E+00 -1.5590920E+00 -1.5570560E+00
 -1.5550230E+00 -1.5529931E+00 -1.5509664E+00 -1.5489428E+00
 -1.5469222E+00 -1.5449047E+00 -1.5428903E+00 -1.5408788E+00
 -1.5388706E+00 -1.5368653E+00 -1.5348631E+00 -1.5328639E+00
 -1.5308678E+00 -1.5288747E+00 -1.5268846E+00 -1.5248975E+00
 -1.5229135E+00 -1.5209325E+00 -1.5189545E+00 -1.5169794E+00
 -1.5150074E+00 -1.5130384E+00 -1.5110723E+00 -1.5091093E+00
 -1.5071492E+00 -1.5051920E+00 -1.5032379E+00 -1.5012867E+00
 -1.4993384E+00 -1.4973932E+00 -1.4954508E+00 -1.4935114E+00
 -1.4915749E+00 -1.4896413E+00 -1.4877107E+00 -1.4857830E+00
 -1.4838582E+00 -1.4819363E+00 -1.4800173E+00 -1.4781013E+00
 -1.4761880E+00 -1.4742778E+00 -1.4723703E+00 -1.4704658E+00
 -1.4685641E+00 -1.4666653E+00 -1.4647694E+00 -1.4628763E+00
 -1.4609861E+00 -1.4590987E+00 -1.4572142E+00 -1.4553325E+00
 -1.4534536E+00 -1.4515776E+00 -1.4497044E+00 -1.4478340E+00
 -1.4459664E+00 -1.4441017E+00 -1.4422397E+00 -1.4403806E+00
 -1.4385242E+00 -1.4366706E+00 -1.4348198E+00 -1.4329718E+00
 -1.4311266E+00 -1.4292842E+00 -1.4274445E+00 -1.4256076E+00
 -1.4237734E+00 -1.4219420E+00 -1.4201133E+00 -1.4182874E+00
 -1.4164642E+00 -1.4146437E+00 -1.4128260E+00 -1.4110110E+00
 -1.4091987E+00 -1.4073892E+00 -1.4055823E+00 -1.4037782E+00
 -1.4019767E+00 -1.4001779E+00 -1.3983819E+00 -1.3965885E+00
 -1.3947979E+00 -1.3930098E+00 -1.3912245E+00 -1.3894418E+00
 -1.3876619E+00 -1.3858845E+00 -1.3841098E+00 -1.3823378E+00
 -1.3805684E+00 -1.3788016E+00 -1.3770375E+00 -1.3752760E+00
 -1.3735172E+00 -1.3717610E+00 -1.3700073E+00 -1.3682564E+00
 -1.3665080E+00 -1.3647622E+00 -1.3630190E+00 -1.3612784E+00
 -1.3595405E+00 -1.3578050E+00 -1.3560722E+00 -1.3543420E+00
 -1.3526143E+00 -1.3508892E+00 -1.3491667E+00 -1.3474467E+00
 -1.3457294E+00 -1.3440145E+00 -1.3423022E+00 -1.3405925E+00
 -1.3388852E+00 -1.3371806E+00 -1.3354784E+00 -1.3337788E+00
 -1.3320817E+00 -1.3303871E+00 -1.3286950E+00 -1.3270055E+00
 -1.3253184E+00 -1.3236338E+00 -1.3219518E+00 -1.3202723E+00
 -1.3185952E+00 -1.3169206E+00 -1.3152485E+00 -1.3135789E+00
 -1.3119117E+00 -1.3102470E+00 -1.3085848E+00 -1.3069250E+00
 -1.3052678E+00 -1.3036129E+00 -1.3019605E+00 -1.3003105E+00
 -1.2986630E+00 -1.2970179E+00 -1.2953753E+00 -1.2937350E+00
 -1.2920972E+00 -1.2904618E+00 -1.2888288E+00 -1.2871982E+00
 -1.2855701E+00 -1.2839443E+00 -1.2823210E+00 -1.2807000E+00
 -1.2790814E+00 -1.2774652E+00 -1.2758514E+00 -1.2742400E+00
 -1.2726309E+00 -1.2710243E+00 -1.2694199E+00 -1.2678179E+00
 -1.2662183E+00 -1.2646211E+00 -1.2630262E+00 -1.2614336E+00
 -1.2598434E+00 -1.2582556E+00 -1.2566700E+00 -1.2550868E+00
 -1.2535060E+00 -1.2519274E+00 -1.2503512E+00 -1.2487772E+00
 -1.2472056E+00 -1.2456363E+00 -1.2440693E+00 -1.2425046E+00
 -1.2409422E+00 -1.2393821E+00 -1.2378242E+00 -1.2362687E+00
 -1.2347155E+00 -1.2331645E+00 -1.2316157E+00 -1.2300693E+00
 -1.2285251E+00 -1.2269832E+00 -1.2254435E+00 -1.2239061E+00
 -1.2223709E+00 -1.2208381E+00 -1.2193074E+00 -1.2177790E+00
 -1.2162527E+00 -1.2147288E+00 -1.2132071E+00 -1.2116876E+00
 -1.2101702E+00 -1.2086552E+00 -1.2071423E+00 -1.2056316E+00
 -1.2041232E+00 -1.2026169E+00 -1.2011129E+00 -1.1996110E+00
 -1.1981114E+00 -1.1966138E+00 -1.1951186E+00 -1.1936255E+00
 -1.1921345E+00 -1.1906457E+00 -1.1891591E+00 -1.1876747E+00
 -1.1861924E+00 -1.1847123E+00 -1.1832343E+00 -1.1817585E+00
 -1.1802848E+00 -1.1788133E+00 -1.1773439E+00 -1.1758767E+00
 -1.1744116E+00 -1.1729486E+00 -1.1714877E+00 -1.1700290E+00
 -1.1685724E+00 -1.1671178E+00 -1.1656655E+00 -1.1642152E+00
 -1.1627670E+00 -1.1613209E+00 -1.1598770E+00 -1.1584351E+00
 -1.1569952E+00 -1.1555576E+00 -1.1541219E+00 -1.1526884E+00
 -1.1512569E+00 -1.1498276E+00 -1.1484002E+00 -1.1469749E+00
 -1.1455517E+00 -1.1441306E+00 -1.1427116E+00 -1.1412945E+00
 -1.1398796E+00 -1.1384666E+00 -1.1370557E+00 -1.1356469E+00
 -1.1342401E+00 -1.1328353E+00 -1.1314325E+00 -1.1300318E+00
 -1.1286332E+00 -1.1272364E+00 -1.1258418E+00 -1.1244491E+00
 -1.1230585E+00 -1.1216699E+00 -1.1202833E+00 -1.1188986E+00
 -1.1175160E+00 -1.1161353E+00 -1.1147567E+00 -1.1133800E+00
 -1.1120054E+00 -1.1106326E+00 -1.1092619E+00 -1.1078931E+00
 -1.1065264E+00 -1.1051615E+00 -1.1037987E+00 -1.1024378E+00
 -1.1010788E+00 -1.0997219E+00 -1.0983668E+00 -1.0970138E+00
 -1.0956626E+00 -1.0943134E+00 -1.0929662E+00 -1.0916208E+00
 -1.0902774E+00 -1.0889360E+00 -1.0875964E+00 -1.0862588E+00
 -1.0849231E+00 -1.0835893E+00 -1.0822574E+00 -1.0809275E+00
 -1.0795994E+00 -1.0782733E+00 -1.0769490E+00 -1.0756267E+00
 -1.0743062E+00 -1.0729877E+00 -1.0716710E+00 -1.0703561E+00
 -1.0690433E+00 -1.0677322E+00 -1.0664230E+00 -1.0651157E+00
 -1.0638103E+00 -1.0625068E+00 -1.0612051E+00 -1.0599053E+00
 -1.0586072E+00 -1.0573112E+00 -1.0560169E+00 -1.0547244E+00
 -1.0534339E+00 -1.0521452E+00 -1.0508582E+00 -1.0495732E+00
 -1.0482899E+00 -1.0470086E+00 -1.0457290E+00 -1.0444512E+00
 -1.0431753E+00 -1.0419012E+00 -1.0406289E+00 -1.0393584E+00
 -1.0380898E+00 -1.0368229E+00 -1.0355579E+00 -1.0342946E+00
 -1.0330331E+00 -1.0317734E+00 -1.0305155E+00 -1.0292595E+00
 -1.0280051E+00 -1.0267526E+00 -1.0255019E+00 -1.0242530E+00
 -1.0230058E+00 -1.0217603E+00 -1.0205167E+00 -1.0192748E+00
 -1.0180347E+00 -1.0167963E+00 -1.0155597E+00 -1.0143249E+00
 -1.0130918E+00 -1.0118604E+00 -1.0106309E+00 -1.0094030E+00
 -1.0081769E+00 -1.0069525E+00 -1.0057298E+00 -1.0045089E+00
 -1.0032897E+00 -1.0020722E+00 -1.0008566E+00 -9.9964253E-01
 -9.9843023E-01 -9.9721965E-01 -9.9601073E-01 -9.9480360E-01
 -9.9359813E-01 -9.9239438E-01 -9.9119235E-01 -9.8999198E-01
 -9.8879333E-01 -9.8759633E-01 -9.8640105E-01 -9.8520750E-01
 -9.8401560E-01 -9.8282535E-01 -9.8163683E-01 -9.8044995E-01
 -9.7926473E-01 -9.7808123E-01 -9.7689938E-01 -9.7571918E-01
 -9.7454070E-01 -9.7336380E-01 -9.7218863E-01 -9.7101503E-01
 -9.6984315E-01 -9.6867293E-01 -9.6750428E-01 -9.6633735E-01
 -9.6517200E-01 -9.6400838E-01 -9.6284633E-01 -9.6168593E-01
 -9.6052718E-01 -9.5937000E-01 -9.5821448E-01 -9.5706060E-01
 -9.5590830E-01 -9.5475765E-01 -9.5360858E-01 -9.5246115E-01
 -9.5131538E-01 -9.5017118E-01 -9.4902855E-01 -9.4788758E-01
 -9.4674818E-01 -9.4561035E-01 -9.4447410E-01 -9.4333950E-01
 -9.4220648E-01 -9.4107503E-01 -9.3994523E-01 -9.3881693E-01
 -9.3769020E-01 -9.3656513E-01 -9.3544155E-01 -9.3431963E-01
  3.2922791E+04  6.5542472E+04  9.7861140E+04  1.2988088E+05
  1.6160374E+05  1.9303179E+05  2.2416707E+05  2.5501161E+05
  2.8556743E+05  3.1583652E+05  3.4582089E+05  3.7552250E+05
  4.0494335E+05  4.3408536E+05  4.6295050E+05  4.9154069E+05
  5.1985784E+05  5.4790388E+05  5.7568068E+05  6.0319015E+05
  6.3043415E+05  6.5741454E+05  6.8413318E+05  7.1059189E+05
  7.3679252E+05  7.6273688E+05  7.8842670E+05  8.1386393E+05
  8.3905020E+05  8.6398740E+05  8.8867718E+05  9.1312140E+05
  9.3732165E+05  9.6127980E+05  9.8499750E+05  1.0084765E+06
  1.0317185E+06  1.0547251E+06  1.0774980E+06  1.1000389E+06
  1.1223494E+06  1.1444313E+06  1.1662860E+06  1.1879153E+06
  1.2093208E+06  1.2305040E+06  1.2514665E+06  1.2722100E+06
  1.2927360E+06  1.3130460E+06  1.3331417E+06  1.3530245E+06
  1.3726961E+06  1.3921578E+06  1.4114113E+06  1.4304580E+06
  1.4492995E+06  1.4679371E+06  1.4863725E+06  1.5046071E+06
  1.5226422E+06  1.5404795E+06  1.5581202E+06  1.5755660E+06
  1.5928180E+06  1.6098779E+06  1.6267469E+06  1.6434265E+06
  1.6599181E+06  1.6762230E+06  1.6923426E+06  1.7082783E+06
  1.7240315E+06  1.7396033E+06  1.7549954E+06  1.7702087E+06
  1.7852449E+06  1.8001052E+06  1.8147908E+06  1.8293030E+06
  1.8436431E+06  1.8578125E+06  1.8718124E+06  1.8856440E+06
  1.8993086E+06  1.9128074E+06  1.9261417E+06  1.9393127E+06
  1.9523216E+06  1.9651697E+06  1.9778581E+06  1.9903880E+06
  2.0027607E+06  2.0149773E+06  2.0270390E+06  2.0389469E+06
  2.0507023E+06  2.0623062E+06  2.0737598E+06  2.0850643E+06
  2.0962208E+06  2.1072303E+06  2.1180941E+06  2.1288132E+06
  2.1393887E+06  2.1498218E+06  2.1601134E+06  2.1702648E+06
  2.1802769E+06  2.1901509E+06  2.1998878E+06  2.2094885E+06
  2.2189544E+06  2.2282862E+06  2.2374851E+06  2.2465520E+06
  2.2554881E+06  2.2642943E+06  2.2729717E+06  2.2815212E+06
  2.2899437E+06  2.2982405E+06  2.3064122E+06  2.3144601E+06
  2.3223850E+06  2.3301879E+06  2.3378697E+06  2.3454314E+06
  2.3528740E+06  2.3601983E+06  2.3674055E+06  2.3744961E+06
  2.3814713E+06  2.3883321E+06  2.3950792E+06  2.4017135E+06
  2.4082361E+06  2.4146476E+06  2.4209492E+06  2.4271415E+06
  2.4332255E+06  2.4392021E+06  2.4450721E+06  2.4508363E+06
  2.4564957E+06  2.4620510E+06  2.4675032E+06  2.4728529E+06
  2.4781012E+06  2.4832487E+06  2.4882963E+06  2.4932448E+06
  2.4980951E+06  2.5028477E+06  2.5075038E+06  2.5120640E+06
  2.5165290E+06  2.5208997E+06  2.5251768E+06  2.5293611E+06
  2.5334534E+06  2.5374544E+06  2.5413649E+06  2.5451856E+06
  2.5489173E+06  2.5525607E+06  2.5561166E+06  2.5595856E+06
  2.5629685E+06  2.5662660E+06  2.5694789E+06  2.5726078E+06
  2.5756535E+06  2.5786166E+06  2.5814978E+06  2.5842978E+06
  2.5870174E+06  2.5896572E+06  2.5922179E+06  2.5947001E+06
  2.5971045E+06  2.5994318E+06  2.6016827E+06  2.6038577E+06
  2.6059575E+06  2.6079829E+06  2.6099344E+06  2.6118127E+06
  2.6136184E+06  2.6153521E+06  2.6170144E+06  2.6186060E+06
  2.6201276E+06  2.6215796E+06  2.6229627E+06  2.6242775E+06
  2.6255247E+06  2.6267048E+06  2.6278184E+06  2.6288660E+06
  2.6298483E+06  2.6307659E+06  2.6316193E+06  2.6324091E+06
  2.6331359E+06  2.6338001E+06  2.6344025E+06  2.6349435E+06
  2.6354237E+06  2.6358437E+06  2.6362040E+06  2.6365050E+06
  2.6367474E+06  2.6369318E+06  2.6370585E+06  2.6371283E+06
  2.6371415E+06  2.6370986E+06  2.6370003E+06  2.6368471E+06
  2.6366393E+06  2.6363776E+06  2.6360624E+06  2.6356943E+06
  2.6352737E+06  2.6348011E+06  2.6342771E+06  2.6337020E+06
  2.6330763E+06  2.6324007E+06  2.6316755E+06  2.6309011E+06
  2.6300781E+06  2.6292070E+06  2.6282881E+06  2.6273220E+06
  2.6263091E+06  2.6252498E+06  2.6241446E+06  2.6229941E+06
  2.6217984E+06  2.6205582E+06  2.6192738E+06  2.6179458E+06
  2.6165744E+06  2.6151602E+06  2.6137037E+06  2.6122050E+06
  2.6106648E+06  2.6090834E+06  2.6074613E+06  2.6057988E+06
  2.6040964E+06  2.6023544E+06  2.6005733E+06  2.5987534E+06
  2.5968951E+06  2.5949990E+06  2.5930652E+06  2.5910942E+06
  2.5890865E+06  2.5870423E+06  2.5849621E+06  2.5828462E+06
  2.5806950E+06  2.5785089E+06  2.5762883E+06  2.5740334E+06
  2.5717447E+06  2.5694225E+06  2.5670672E+06  2.5646792E+06
  2.5622587E+06  2.5598062E+06  2.5573220E+06  2.5548063E+06
  2.5522597E+06  2.5496824E+06  2.5470746E+06  2.5444370E+06
  2.5417696E+06  2.5390728E+06  2.5363470E+06  2.5335925E+06
  2.5308096E+06  2.5279986E+06  2.5251599E+06  2.5222938E+06
  2.5194005E+06  2.5164805E+06  2.5135339E+06  2.5105611E+06
  2.5075625E+06  2.5045382E+06  2.5014886E+06  2.4984140E+06
  2.4953148E+06  2.4921911E+06  2.4890434E+06  2.4858717E+06
  2.4826766E+06  2.4794582E+06  2.4762168E+06  2.4729527E+06
  2.4696662E+06  2.4663575E+06  2.4630270E+06  2.4596749E+06
  2.4563014E+06  2.4529069E+06  2.4494915E+06  2.4460557E+06
  2.4425996E+06  2.4391234E+06  2.4356275E+06  2.4321121E+06
  2.4285774E+06  2.4250238E+06  2.4214514E+06  2.4178605E+06
  2.4142514E+06  2.4106242E+06  2.4069793E+06  2.4033169E+06
  2.3996372E+06  2.3959403E+06  2.3922268E+06  2.3884966E+06
  2.3847501E+06  2.3809874E+06  2.3772089E+06  2.3734147E+06
  2.3696051E+06  2.3657802E+06  2.3619404E+06  2.3580857E+06
  2.3542165E+06  2.3503329E+06  2.3464352E+06  2.3425236E+06
  2.3385983E+06  2.3346595E+06  2.3307074E+06  2.3267422E+06
  2.3227641E+06  2.3187734E+06  2.3147702E+06  2.3107547E+06
  2.3067270E+06  2.3026875E+06  2.2986364E+06  2.2945737E+06
  2.2904997E+06  2.2864146E+06  2.2823186E+06  2.2782119E+06
  2.2740945E+06  2.2699668E+06  2.2658290E+06  2.2616811E+06
  2.2575234E+06  2.2533560E+06  2.2491792E+06  2.2449931E+06
  2.2407979E+06  2.2365937E+06  2.2323807E+06  2.2281591E+06
  2.2239291E+06  2.2196909E+06  2.2154444E+06  2.2111901E+06
  2.2069280E+06  2.2026583E+06  2.1983811E+06  2.1940967E+06
  2.1898050E+06  2.1855065E+06  2.1812010E+06  2.1768889E+06
  2.1725703E+06  2.1682453E+06  2.1639141E+06  2.1595768E+06
  2.1552336E+06  2.1508846E+06  2.1465300E+06  2.1421699E+06
  2.1378044E+06  2.1334338E+06  2.1290581E+06  2.1246775E+06
  2.1202921E+06  2.1159020E+06  2.1115074E+06  2.1071085E+06
  2.1027053E+06  2.0982980E+06  2.0938867E+06  2.0894715E+06
  2.0850527E+06  2.0806302E+06  2.0762043E+06  2.0717750E+06
  2.0673425E+06  2.0629070E+06  2.0584685E+06  2.0540270E+06
  2.0495829E+06  2.0451362E+06  2.0406869E+06  2.0362353E+06
  2.0317814E+06  2.0273255E+06  2.0228674E+06  2.0184074E+06
  2.0139457E+06  2.0094822E+06  2.0050172E+06  2.0005507E+06
  1.9960828E+06  1.9916137E+06  1.9871434E+06  1.9826720E+06
  1.9781998E+06  1.9737267E+06  1.9692528E+06  1.9647783E+06
  1.9603033E+06  1.9558279E+06  1.9513520E+06  1.9468760E+06
  1.9423999E+06  1.9379237E+06  1.9334475E+06  1.9289714E+06
  1.9244957E+06  1.9200202E+06  1.9155452E+06  1.9110707E+06
  1.9065968E+06  1.9021235E+06  1.8976511E+06  1.8931796E+06
  1.8887090E+06  1.8842393E+06  1.8797709E+06  1.8753037E+06
  1.8708377E+06  1.8663732E+06  1.8619101E+06  1.8574485E+06
  1.8529886E+06  1.8485303E+06  1.8440739E+06  1.8396193E+06
  1.8351666E+06  1.8307160E+06  1.8262674E+06  1.8218210E+06
  1.8173768E+06  1.8129350E+06  1.8084955E+06  1.8040585E+06
  1.7996240E+06  1.7951921E+06  1.7907629E+06  1.7863364E+06
  1.7819127E+06  1.7774919E+06  1.7730740E+06  1.7686592E+06
  1.7642474E+06  1.7598388E+06  1.7554333E+06  1.7510312E+06
  1.7466323E+06  1.7422368E+06  1.7378448E+06  1.7334563E+06
  1.7290715E+06  1.7246902E+06  1.7203127E+06  1.7159388E+06
  1.7115688E+06  1.7072027E+06  1.7028405E+06  1.6984823E+06
  1.6941281E+06  1.6897780E+06  1.6854321E+06  1.6810904E+06
  1.6767529E+06  1.6724198E+06  1.6680909E+06  1.6637666E+06
  1.6594466E+06  1.6551313E+06  1.6508204E+06  1.6465142E+06
  1.6422126E+06  1.6379158E+06  1.6336238E+06  1.6293365E+06
  1.6250540E+06  1.6207765E+06  1.6165040E+06  1.6122364E+06
  1.6079738E+06  1.6037163E+06  1.5994640E+06  1.5952168E+06
  1.5909749E+06  1.5867381E+06  1.5825067E+06  1.5782806E+06
  1.5740599E+06  1.5698446E+06  1.5656348E+06  1.5614303E+06
  1.5572315E+06  1.5530383E+06  1.5488507E+06  1.5446687E+06
  1.5404923E+06  1.5363217E+06  1.5321569E+06  1.5279977E+06
  1.5238445E+06  1.5196971E+06  1.5155557E+06  1.5114201E+06
  1.5072905E+06  1.5031669E+06  1.4990493E+06  1.4949377E+06
  1.4908323E+06  1.4867330E+06  1.4826398E+06  1.4785528E+06
  1.4744720E+06  1.4703974E+06  1.4663292E+06  1.4622672E+06
  1.4582115E+06  1.4541623E+06  1.4501193E+06  1.4460828E+06
  1.4420527E+06  1.4380291E+06  1.4340119E+06  1.4300013E+06
  1.4259972E+06  1.4219997E+06  1.4180087E+06  1.4140244E+06
  1.4100467E+06  1.4060757E+06  1.4021114E+06  1.3981537E+06
  1.3942028E+06  1.3902586E+06  1.3863212E+06  1.3823905E+06
  1.3784667E+06  1.3745497E+06  1.3706396E+06  1.3667363E+06
  1.3628399E+06  1.3589505E+06  1.3550680E+06  1.3511924E+06
  1.3473238E+06  1.3434621E+06  1.3396075E+06  1.3357599E+06
  1.3319193E+06  1.3280858E+06  1.3242594E+06  1.3204400E+06
  1.3166278E+06  1.3128226E+06  1.3090246E+06  1.3052337E+06
  1.3014500E+06  1.2976735E+06  1.2939042E+06  1.2901421E+06
  1.2863871E+06  1.2826394E+06  1.2788990E+06  1.2751658E+06
  1.2714399E+06  1.2677213E+06  1.2640100E+06  1.2603059E+06
  1.2566093E+06  1.2529199E+06  1.2492378E+06  1.2455631E+06
  1.2418958E+06  1.2382358E+06  1.2345832E+06  1.2309380E+06
  1.2273002E+06  1.2236698E+06  1.2200468E+06  1.2164313E+06
  1.2128232E+06  1.2092225E+06  1.2056293E+06  1.2020435E+06
  1.1984652E+06  1.1948944E+06  1.1913310E+06  1.1877752E+06
  1.1842268E+06  1.1806859E+06  1.1771525E+06  1.1736267E+06
  1.1701083E+06  1.1665975E+06  1.1630942E+06  1.1595985E+06
  1.1561102E+06  1.1526296E+06  1.1491565E+06  1.1456909E+06
  1.1422328E+06  1.1387824E+06  1.1353394E+06  1.1319041E+06
  1.1284763E+06  1.1250562E+06  1.1216435E+06  1.1182385E+06
  1.1148410E+06  1.1114512E+06  1.1080688E+06  1.1046941E+06
  1.1013271E+06  1.0979675E+06  1.0946156E+06  1.0912712E+06
  1.0879345E+06  1.0846054E+06  1.0812838E+06  1.0779698E+06
  1.0746635E+06  1.0713647E+06  1.0680736E+06  1.0647900E+06
  1.0615140E+06  1.0582457E+06  1.0549849E+06  1.0517317E+06
  1.0484861E+06  1.0452482E+06  1.0420178E+06  1.0387949E+06
  1.0355797E+06  1.0323721E+06  1.0291721E+06  1.0259796E+06
  1.0227947E+06  1.0196174E+06  1.0164477E+06  1.0132856E+06
  1.0101311E+06  1.0069841E+06  1.0038446E+06  1.0007128E+06
  9.9758850E+05  9.9447173E+05  9.9136253E+05  9.8826090E+05
  9.8516685E+05  9.8208030E+05  9.7900133E+05  9.7592985E+05
  9.7286588E+05  9.6980948E+05  9.6676065E+05  9.6371925E+05
  9.6068543E+05  9.5765910E+05  9.5464028E+05  9.5162895E+05
  9.4862513E+05  9.4562880E+05  9.4263990E+05  9.3965850E+05
  9.3668460E+05  9.3371820E+05  9.3075923E+05  9.2780768E+05
  9.2486363E+05  9.2192700E+05  9.1899780E+05  9.1607603E+05
  9.1316168E+05  9.1025483E+05  9.0735533E+05  9.0446318E+05
  9.0157853E+05  8.9870123E+05  8.9583128E+05  8.9296875E+05
  8.9011358E+05  8.8726575E+05  8.8442535E+05  8.8159223E+05
  8.7876645E+05  8.7594810E+05  8.7313695E+05  8.7033323E+05
  8.6753670E+05  8.6474760E+05  8.6196570E+05  8.5919115E+05
  8.5642380E+05  8.5366380E+05  8.5091100E+05  8.4816555E+05
  8.4542723E+05  8.4269625E+05  8.3997240E+05  8.3725583E+05
  8.3454645E+05  8.3184428E+05  8.2914930E+05  8.2646153E+05
  8.2378095E+05  8.2110750E+05  8.1844118E+05  8.1578205E+05
  8.1313005E+05  8.1048518E+05  8.0784743E+05  8.0521680E+05
  8.0259323E+05  7.9997678E+05  7.9736738E+05  7.9476510E+05
  7.9216988E+05  7.8958170E+05  7.8700050E+05  7.8442643E+05
  7.8185933E+05  7.7929928E+05  7.7674613E+05  7.7420010E+05
  7.7166098E+05  7.6912883E+05  7.6660365E+05  7.6408545E+05
  7.6157415E+05  7.5906983E+05  7.5657240E+05  7.5408188E+05
  7.5159818E+05  7.4912147E+05  7.4665160E+05  7.4418860E+05
  7.4173244E+05  7.3928314E+05  7.3684066E+05  7.3440501E+05
  7.3197617E+05  7.2955412E+05  7.2713887E+05  7.2473039E+05
  7.2232868E+05  7.1993372E+05  7.1754550E+05  7.1516401E+05
  7.1278925E+05  7.1042119E+05  7.0805984E+05  7.0570516E+05
  7.0335716E+05  7.0101583E+05  6.9868115E+05  6.9635310E+05
  6.9403169E+05  6.9171689E+05  6.8940869E+05  6.8710709E+05
  6.8481207E+05  6.8252362E+05  6.8024172E+05  6.7796637E+05
  6.7569756E+05  6.7343526E+05  6.7117948E+05  6.6893019E+05
  6.6668739E+05  6.6445107E+05  6.6222120E+05  6.5999779E+05
  6.5778081E+05  6.5557025E+05  6.5336612E+05  6.5116838E+05
  6.4897703E+05  6.4679205E+05  6.4461344E+05  6.4244118E+05
  6.4027526E+05  6.3811568E+05  6.3596240E+05  6.3381542E+05
  6.3167474E+05  6.2954033E+05  6.2741219E+05  6.2529030E+05
  6.2317465E+05  6.2106523E+05  6.1896203E+05  6.1686503E+05
  6.1477421E+05  6.1268957E+05  6.1061111E+05  6.0853879E+05
  6.0647261E+05  6.0441256E+05  6.0235862E+05  6.0031079E+05
  5.9826905E+05  5.9623338E+05  5.9420378E+05  5.9218022E+05
  5.9016271E+05  5.8815122E+05  5.8614575E+05  5.8414628E+05
  5.8215279E+05  5.8016528E+05  5.7818373E+05  5.7620813E+05
  5.7423847E+05  5.7227473E+05  5.7031690E+05  5.6836497E+05
  5.6641892E+05  5.6447875E+05  5.6254444E+05  5.6061597E+05
  5.5869334E+05  5.5677653E+05  5.5486553E+05  5.5296032E+05
  5.5106090E+05  5.4916724E+05  5.4727935E+05  5.4539720E+05
  5.4352077E+05  5.4165007E+05  5.3978507E+05  5.3792576E+05
  5.3607214E+05  5.3422418E+05  5.3238188E+05  5.3054521E+05
  5.2871417E+05  5.2688876E+05  5.2506893E+05  5.2325471E+05
  5.2144605E+05  5.1964296E+05  5.1784542E+05  5.1605342E+05
  5.1426695E+05  5.1248598E+05  5.1071051E+05  5.0894054E+05
  5.0717603E+05  5.0541698E+05  5.0366339E+05  5.0191523E+05
  5.0017248E+05  4.9843515E+05  4.9670321E+05  4.9497666E+05
  4.9325548E+05  4.9153965E+05  4.8982917E+05  4.8812402E+05
  4.8642419E+05  4.8472967E+05  4.8304044E+05  4.8135649E+05
  4.7967781E+05  4.7800438E+05  4.7633620E+05  4.7467324E+05
  4.7301550E+05  4.7136296E+05  4.6971562E+05  4.6807345E+05
  4.6643645E+05  4.6480460E+05  4.6317789E+05  4.6155631E+05
  4.5993984E+05  4.5832847E+05  4.5672219E+05  4.5512099E+05
  4.5352485E+05  4.5193376E+05  4.5034772E+05  4.4876669E+05
  4.4719068E+05  4.4561967E+05  4.4405365E+05  4.4249260E+05
  4.4093651E+05  4.3938538E+05  4.3783918E+05  4.3629791E+05
  4.3476154E+05  4.3323008E+05  4.3170350E+05  4.3018180E+05
  4.2866496E+05  4.2715297E+05  4.2564581E+05  4.2414348E+05
  4.2264596E+05  4.2115325E+05  4.1966531E+05  4.1818215E+05
  4.1670376E+05  4.1523011E+05  4.1376120E+05  4.1229701E+05
  4.1083754E+05  4.0938277E+05  4.0793268E+05  4.0648727E+05
  4.0504653E+05  4.0361043E+05  4.0217897E+05  4.0075214E+05
  3.9932993E+05  3.9791231E+05  3.9649928E+05  3.9509084E+05
  3.9368696E+05  3.9228762E+05  3.9089283E+05  3.8950257E+05
  3.8811683E+05  3.8673559E+05  3.8535884E+05  3.8398657E+05
  3.8261877E+05  3.8125542E+05  3.7989653E+05  3.7854206E+05
  3.7719200E+05  3.7584637E+05  3.7450512E+05  3.7316826E+05
  3.7183577E+05  3.7050764E+05  3.6918386E+05  3.6786442E+05
  3.6654929E+05  3.6523849E+05  3.6393198E+05  3.6262976E+05
  3.6133182E+05  3.6003815E+05  3.5874872E+05  3.5746355E+05
  3.5618260E+05  3.5490587E+05  3.5363334E+05  3.5236502E+05
  3.5110087E+05  3.4984089E+05  3.4858508E+05  3.4733341E+05
  3.4608588E+05  3.4484248E+05  3.4352980E+05  3.4229702E+05
  3.4106986E+05  3.3984832E+05  3.3863237E+05  3.3742199E+05
  3.3621717E+05  3.3501790E+05  3.3382415E+05  3.3263591E+05
  3.3145316E+05  3.3027587E+05  3.2910404E+05  3.2793765E+05
  3.2677667E+05  3.2562110E+05  3.2447091E+05  3.2332609E+05
  3.2218661E+05  3.2105246E+05  3.1992362E+05  3.1880007E+05
  3.1768180E+05  3.1656878E+05  3.1546100E+05  3.1435844E+05
  3.1326107E+05  3.1216890E+05  3.1108188E+05  3.1000001E+05
  3.0892327E+05  3.0785163E+05  3.0678509E+05  3.0572360E+05
  3.0466718E+05  3.0361578E+05  3.0256940E+05  3.0152801E+05
  3.0049160E+05  2.9946014E+05  2.9843362E+05  2.9741202E+05
  2.9639531E+05  2.9538349E+05  2.9437652E+05  2.9337440E+05
  2.9237709E+05  2.9138459E+05  2.9039687E+05  2.8941392E+05
  2.8843570E+05  2.8746221E+05  2.8649342E+05  2.8552931E+05
  2.8456987E+05  2.8361507E+05  2.8266491E+05  2.8171934E+05
  2.8077836E+05  2.7984194E+05  2.7891007E+05  2.7798272E+05
  2.7705988E+05  2.7614153E+05  2.7522763E+05  2.7431819E+05
  2.7341316E+05  2.7251255E+05  2.7161631E+05  2.7072444E+05
  2.6983691E+05  2.6895371E+05  2.6807481E+05  2.6720020E+05
  2.6632985E+05  2.6546373E+05  2.6460185E+05  2.6374415E+05
  2.6289065E+05  2.6204130E+05  2.6119609E+05  2.6035500E+05
  2.5951801E+05  2.5868510E+05  2.5785624E+05  2.5703143E+05
  2.5621063E+05  2.5539382E+05  2.5458099E+05  2.5377211E+05
  2.5296716E+05  2.5216613E+05  2.5136900E+05  2.5057573E+05
  2.4978631E+05  2.4900072E+05  2.4821894E+05  2.4744095E+05
  2.4666673E+05  2.4589625E+05  2.4512950E+05  2.4436645E+05
  2.4360708E+05  2.4285138E+05  2.4209932E+05  2.4135088E+05
  2.4060605E+05  2.3986478E+05  2.3912708E+05  2.3839292E+05
  2.3766227E+05  2.3693511E+05  2.3621144E+05  2.3549121E+05
  2.3477441E+05  2.3406104E+05  2.3335104E+05  2.3264442E+05
  2.3194115E+05  2.3124120E+05  2.3054456E+05  2.2985121E+05
  2.2916112E+05  2.2847427E+05  2.2779065E+05  2.2711022E+05
  2.2643299E+05  2.2575890E+05  2.2508796E+05  2.2442014E+05
  2.2375541E+05  2.2309376E+05  2.2243516E+05  2.2177959E+05
  2.2112704E+05  2.2047748E+05  2.1983090E+05  2.1918725E+05
  2.1854655E+05  2.1790875E+05  2.1727384E+05  2.1664179E+05
  2.1601259E+05  2.1538622E+05  2.1476264E+05  2.1414185E+05
  2.1352383E+05  2.1290855E+05  2.1229598E+05  2.1168612E+05
  2.1107894E+05  2.1047441E+05  2.0987253E+05  2.0927326E+05
  2.0867659E+05  2.0808249E+05  2.0749095E+05  2.0690195E+05
  2.0631545E+05  2.0573145E+05  2.0514993E+05  2.0457086E+05
  2.0399421E+05  2.0341998E+05  2.0284814E+05  2.0227868E+05
  2.0171156E+05  2.0114677E+05  2.0058429E+05  2.0002410E+05
  1.9946618E+05  1.9891051E+05  1.9835707E+05  1.9780583E+05
  1.9725678E+05  1.9670990E+05  1.9616517E+05  1.9562257E+05
  1.9508207E+05  1.9454366E+05  1.9400732E+05  1.9347302E+05
  1.9294076E+05  1.9241049E+05  1.9188222E+05  1.9135592E+05
  1.9083156E+05  1.9030913E+05  1.8978862E+05  1.8926999E+05
  1.8875323E+05  1.8823832E+05  1.8772523E+05  1.8721397E+05
  1.8670448E+05  1.8619678E+05  1.8569082E+05  1.8518660E+05
  1.8468410E+05  1.8418328E+05  1.8368414E+05  1.8318666E+05
  1.8269082E+05  1.8219659E+05  1.8170396E+05  1.8121292E+05
  1.8072343E+05  1.8023548E+05  1.7974906E+05  1.7926414E+05
  1.7878071E+05  1.7829875E+05  1.7781823E+05  1.7733914E+05
  1.7686146E+05  1.7638518E+05  1.7591027E+05  1.7543672E+05
  1.7496450E+05  1.7449361E+05  1.7402401E+05  1.7355569E+05
  1.7308865E+05  1.7262284E+05  1.7215827E+05  1.7169491E+05
  1.7123274E+05  1.7077175E+05  1.7031191E+05  1.6985321E+05
  1.6939564E+05  1.6893917E+05  1.6848379E+05  1.6802947E+05
  1.6757621E+05  1.6712398E+05  1.6667277E+05  1.6622256E+05
  1.6577333E+05  1.6532508E+05  1.6487777E+05  1.6443139E+05
  1.6398593E+05  1.6354136E+05  1.6309768E+05  1.6265486E+05
  1.6221290E+05  1.6177175E+05  1.6133144E+05  1.6089191E+05
  1.6045318E+05  1.6001521E+05  1.5957799E+05  1.5914150E+05
  1.5870573E+05  1.5827067E+05  1.5783629E+05  1.5740258E+05
  1.5696953E+05  1.5653712E+05  1.5610534E+05  1.5567416E+05
  1.5524357E+05  1.5481357E+05  1.5438413E+05  1.5395522E+05
  1.5352686E+05  1.5309902E+05  1.5267167E+05  1.5224482E+05
  1.5181844E+05  1.5139252E+05  1.5096704E+05  1.5054199E+05
  1.5011735E+05  1.4969312E+05  1.4926928E+05  1.4884580E+05
  1.4842269E+05  1.4799992E+05  1.4757748E+05  1.4715536E+05
  1.4673354E+05  1.4631201E+05  1.4589076E+05  1.4546977E+05
  1.4504903E+05  1.4462852E+05  1.4420824E+05  1.4378817E+05
  1.4336830E+05  1.4294861E+05  1.4252909E+05  1.4210973E+05
  1.4169052E+05  1.4127144E+05  1.4085248E+05  1.4043363E+05
  1.4001488E+05  1.3959622E+05  1.3917763E+05  1.3875909E+05
  1.3834061E+05  1.3792217E+05  1.3750375E+05  1.3708535E+05
  1.3666695E+05  1.3624854E+05  1.3583012E+05  1.3541166E+05
  1.3499317E+05  1.3457462E+05  1.3415601E+05  1.3373732E+05
  1.3331856E+05  1.3289970E+05  1.3248074E+05  1.3206166E+05
  1.3164245E+05  1.3122311E+05  1.3080364E+05  1.3038400E+05
  1.2996420E+05  1.2954423E+05  1.2912408E+05  1.2870374E+05
  1.2828319E+05  1.2786243E+05  1.2744146E+05  1.2702026E+05
  1.2659882E+05  1.2617714E+05  1.2575520E+05  1.2533300E+05
  1.2491054E+05  1.2448779E+05  1.2406476E+05  1.2364144E+05
  1.2321782E+05  1.2279388E+05  1.2236963E+05  1.2194506E+05
  1.2152015E+05  1.2109491E+05  1.2066932E+05  1.2024338E+05
  1.1981708E+05  1.1939042E+05  1.1896338E+05  1.1853597E+05
  1.1810817E+05  1.1767998E+05  1.1725139E+05  1.1682241E+05
  1.1639301E+05  1.1596320E+05  1.1553298E+05  1.1510233E+05
  1.1467124E+05  1.1423973E+05  1.1380778E+05  1.1337537E+05
  1.1294252E+05  1.1250923E+05  1.1207546E+05  1.1164124E+05
  1.1120656E+05  1.1077140E+05  1.1033577E+05  1.0989967E+05
  1.0946308E+05  1.0902600E+05  1.0858844E+05  1.0815039E+05
  1.0771185E+05  1.0727281E+05  1.0683327E+05  1.0639322E+05
  1.0595268E+05  1.0551163E+05  1.0507007E+05  1.0462800E+05
  1.0418541E+05  1.0374232E+05  1.0329871E+05  1.0285457E+05
  1.0240993E+05  1.0196477E+05  1.0151908E+05  1.0107287E+05
  1.0062614E+05  1.0017890E+05  9.9731123E+04  9.9282825E+04
  9.8834010E+04  9.8384670E+04  9.7934813E+04  9.7484430E+04
  9.7033530E+04  9.6582105E+04  9.6130163E+04  9.5677703E+04
  9.5224725E+04  9.4771238E+04  9.4317225E+04  9.3862710E+04
  9.3407685E+04  9.2952143E+04  9.2496105E+04  9.2039558E+04
  9.1582508E+04  9.1124963E+04  9.0666923E+04  9.0208388E+04
  8.9749365E+04  8.9289855E+04  8.8829865E+04  8.8369395E+04
  8.7908445E+04  8.7447030E+04  8.6985143E+04  8.6522798E+04
  8.6059995E+04  8.5596735E+04  8.5133025E+04  8.4668880E+04
  8.4204285E+04  8.3739270E+04  8.3273820E+04  8.2807943E+04
  8.2341660E+04  8.1874965E+04  8.1407865E+04  8.0940368E+04
  8.0472480E+04  8.0004203E+04  7.9535558E+04  7.9066538E+04
  7.8597158E+04  7.8127418E+04  7.7657340E+04  7.7186910E+04
  7.6716158E+04  7.6245083E+04  7.5773685E+04  7.5301988E+04
  7.4829991E+04  7.4357705E+04  7.3885139E+04  7.3412303E+04
  7.2939205E+04  7.2465857E+04  7.1992267E+04  7.1518445E+04
  7.1044403E+04  7.0570149E+04  7.0095695E+04  6.9621052E+04
  6.9146231E+04  6.8671241E+04  6.8196096E+04  6.7720807E+04
  6.7245384E+04  6.6769841E+04  6.6294189E+04  6.5818441E+04
  6.5342609E+04  6.4866706E+04  6.4390744E+04  6.3914737E+04
  6.3438698E+04  6.2962641E+04  6.2486579E+04  6.2010526E+04
  6.1534496E+04  6.1058503E+04  6.0582563E+04  6.0106688E+04
  5.9630896E+04  5.9155199E+04  5.8679615E+04  5.8204157E+04
  5.7728843E+04  5.7253687E+04  5.6778707E+04  5.6303917E+04
  5.5829335E+04  5.5354977E+04  5.4880860E+04  5.4407002E+04
  5.3933420E+04  5.3460130E+04  5.2987151E+04  5.2514502E+04
  5.2042199E+04  5.1570262E+04  5.1098709E+04  5.0627558E+04
  5.0156829E+04  4.9686542E+04  4.9216714E+04  4.8747366E+04
  4.8278518E+04  4.7810190E+04  4.7342402E+04  4.6875175E+04
  4.6408529E+04  4.5942485E+04  4.5477065E+04  4.5012290E+04
  4.4548181E+04  4.4084759E+04  4.3622048E+04  4.3160070E+04
  4.2698847E+04  4.2238401E+04  4.1778755E+04  4.1319933E+04
  4.0861958E+04  4.0404854E+04  3.9948643E+04  3.9493351E+04
  3.9039002E+04  3.8585618E+04  3.8133228E+04  3.7681853E+04
  3.7231521E+04  3.6782255E+04  3.6334083E+04  3.5887029E+04
  3.5441120E+04  3.4996381E+04  3.4552840E+04  3.4110523E+04
  3.3669458E+04  3.3229670E+04  3.2791189E+04  3.2354041E+04
  3.1918255E+04  3.1483858E+04  3.1050879E+04  3.0619347E+04
  3.0189291E+04  2.9760739E+04  2.9333721E+04  2.8908267E+04
  2.8484406E+04  2.8062168E+04  2.7641585E+04  2.7222685E+04
  2.6805500E+04  2.6390062E+04  2.5976400E+04  2.5564548E+04
  2.5154536E+04  2.4746396E+04  2.4340162E+04  2.3935864E+04
  2.3533536E+04  2.3133212E+04  2.2734923E+04  2.2338704E+04
  2.1944589E+04  2.1552611E+04  2.1162803E+04  2.0775203E+04
  2.0389842E+04  2.0006758E+04  1.9625984E+04  1.9247556E+04
  1.8871510E+04  1.8497882E+04  1.8126709E+04  1.7758025E+04
  1.7391869E+04  1.7028278E+04  1.6667288E+04  1.6308938E+04
  1.5953264E+04  1.5600304E+04  1.5250098E+04  1.4902683E+04
  1.4558099E+04  1.4216384E+04  1.3877578E+04  1.3541720E+04
  1.3208850E+04  1.2879008E+04  1.2552236E+04  1.2228571E+04
  1.1908057E+04  1.1590734E+04  1.1276644E+04  1.0965827E+04
  1.0658327E+04  1.0354185E+04  1.0053444E+04  9.7561463E+03
  9.4623353E+03  9.1720538E+03  8.8853460E+03  8.6022555E+03
  8.3228258E+03  8.0471010E+03  7.7751270E+03  7.5069480E+03
  7.2426092E+03  6.9821560E+03  6.7256341E+03  6.4730895E+03
  6.2245685E+03  5.9801177E+03  5.7397837E+03  5.5036137E+03
  5.2716551E+03  5.0439554E+03  4.8205627E+03  4.6015250E+03
  4.3868909E+03  4.1767092E+03  3.9710288E+03  3.7698992E+03
  3.5733697E+03  3.3814904E+03  3.1943114E+03  3.0118832E+03
  2.8342565E+03  2.6614822E+03  2.4936117E+03  2.3306966E+03
  2.1727886E+03  2.0199401E+03  1.8722033E+03  1.7296312E+03
  1.5922766E+03  1.4601928E+03  1.3334335E+03  1.2120526E+03
  1.0961041E+03  9.8564265E+02  8.8072290E+02  7.8139988E+02
  6.8772903E+02  5.9976593E+02  5.1756649E+02  4.4118695E+02
  3.7068383E+02  3.0611393E+02  2.4753436E+02  1.9500252E+02
  1.4857611E+02  1.0831314E+02  7.4271900E+01  4.6510982E+01
  2.5089283E+01  1.0065996E+01  1.5006167E+00 -1.4885352E+00
 -4.0520094E+00 -6.6127339E+00 -9.1706978E+00 -1.1725891E+01
 -1.4278302E+01 -1.6827920E+01 -1.9374736E+01 -2.1918737E+01
 -2.4459914E+01 -2.6998256E+01 -2.9533752E+01 -3.2066391E+01
 -3.4596163E+01 -3.7123057E+01 -3.9647062E+01 -4.2168167E+01
 -4.4686363E+01 -4.7201638E+01 -4.9713981E+01 -5.2223382E+01
 -5.4729830E+01 -5.7233315E+01 -5.9733826E+01 -6.2231351E+01
 -6.4725881E+01 -6.7217405E+01 -6.9705912E+01 -7.2191391E+01
 -7.4673832E+01 -7.7153220E+01 -7.9629555E+01 -8.2102815E+01
 -8.4573000E+01 -8.7040088E+01 -8.9504070E+01 -9.1964948E+01
 -9.4422690E+01 -9.6877305E+01 -9.9328778E+01 -1.0177709E+02
 -1.0422224E+02 -1.0666421E+02 -1.0910299E+02 -1.1153857E+02
 -1.1397094E+02 -1.1640009E+02 -1.1882602E+02 -1.2124870E+02
 -1.2366812E+02 -1.2608429E+02 -1.2849719E+02 -1.3090679E+02
 -1.3331310E+02 -1.3571611E+02 -1.3811580E+02 -1.4051216E+02
 -1.4290519E+02 -1.4529487E+02 -1.4768119E+02 -1.5006413E+02
 -1.5244370E+02 -1.5481988E+02 -1.5719266E+02 -1.5956202E+02
 -1.6192796E+02 -1.6429046E+02 -1.6664953E+02 -1.6900513E+02
 -1.7135727E+02 -1.7370593E+02 -1.7605111E+02 -1.7839279E+02
 -1.8073096E+02 -1.8306560E+02 -1.8539672E+02 -1.8772430E+02
 -1.9004834E+02 -1.9236880E+02 -1.9468569E+02 -1.9699900E+02
 -1.9930871E+02 -2.0161482E+02 -2.0391731E+02 -2.0621618E+02
 -2.0851142E+02 -2.1080300E+02 -2.1309092E+02 -2.1537518E+02
 -2.1765575E+02 -2.1993263E+02 -2.2220582E+02 -2.2447529E+02
 -2.2674104E+02 -2.2900306E+02 -2.3126133E+02 -2.3351585E+02
 -2.3576660E+02 -2.3801357E+02 -2.4025676E+02 -2.4249616E+02
 -2.4473174E+02 -2.4696350E+02 -2.4919145E+02 -2.5141554E+02
 -2.5363578E+02 -2.5585217E+02 -2.5806468E+02 -2.6027330E+02
 -2.6247804E+02 -2.6467887E+02 -2.6687579E+02 -2.6906878E+02
 -2.7125783E+02 -2.7344294E+02 -2.7562409E+02 -2.7780127E+02
 -2.7997447E+02 -2.8214368E+02 -2.8430889E+02 -2.8647009E+02
 -2.8862727E+02 -2.9078042E+02 -2.9292952E+02 -2.9507456E+02
 -2.9721555E+02 -2.9935246E+02 -3.0148528E+02 -3.0361400E+02
 -3.0573863E+02 -3.0785912E+02 -3.0997550E+02 -3.1208773E+02
 -3.1419581E+02 -3.1629973E+02 -3.1839948E+02 -3.2049505E+02
 -3.2258642E+02 -3.2467359E+02 -3.2675655E+02 -3.2883528E+02
 -3.3090977E+02 -3.3298003E+02 -3.3504602E+02 -3.3710774E+02
 -3.3916519E+02 -3.4121834E+02 -3.4326720E+02 -3.4531175E+02
 -3.4735198E+02 -3.4938787E+02 -3.5141942E+02 -3.5344662E+02
 -3.5546945E+02 -3.5748791E+02 -3.5950199E+02 -3.6151166E+02
 -3.6351694E+02 -3.6551779E+02 -3.6751421E+02 -3.6950620E+02
 -3.7149374E+02 -3.7347682E+02 -3.7545542E+02 -3.7742955E+02
 -3.7939918E+02 -3.8136431E+02 -3.8332493E+02 -3.8528102E+02
 -3.8723258E+02 -3.8917958E+02 -3.9112204E+02 -3.9305993E+02
 -3.9499324E+02 -3.9692196E+02 -3.9884609E+02 -4.0076560E+02
 -4.0268049E+02 -4.0459075E+02 -4.0649637E+02 -4.0839734E+02
 -4.1029364E+02 -4.1218527E+02 -4.1407221E+02 -4.1595446E+02
 -4.1783201E+02 -4.1970483E+02 -4.2157293E+02 -4.2343629E+02
 -4.2529490E+02 -4.2714875E+02 -4.2899784E+02 -4.3084214E+02
 -4.3268165E+02 -4.3451636E+02 -4.3634625E+02 -4.3817132E+02
 -4.3999156E+02 -4.4180696E+02 -4.4361749E+02 -4.4542316E+02
 -4.4722395E+02 -4.4901986E+02 -4.5081086E+02 -4.5259696E+02
 -4.5437814E+02 -4.5615439E+02 -4.5792569E+02 -4.5969205E+02
 -4.6145344E+02 -4.6320986E+02 -4.6496129E+02 -4.6670773E+02
 -4.6844916E+02 -4.7018558E+02 -4.7191697E+02 -4.7364332E+02
 -4.7536463E+02 -4.7708088E+02 -4.7879206E+02 -4.8049815E+02
 -4.8219916E+02 -4.8389507E+02 -4.8558586E+02 -4.8727153E+02
 -4.8895206E+02 -4.9062746E+02 -4.9229769E+02 -4.9396276E+02
 -4.9562266E+02 -4.9727736E+02 -4.9892687E+02 -5.0057117E+02
 -5.0221025E+02 -5.0384411E+02 -5.0547272E+02 -5.0709608E+02
 -5.0871418E+02 -5.1032700E+02 -5.1193454E+02 -5.1353680E+02
 -5.1513374E+02 -5.1672537E+02 -5.1831167E+02 -5.1989264E+02
 -5.2146825E+02 -5.2303851E+02 -5.2460341E+02 -5.2616291E+02
 -5.2771704E+02 -5.2926576E+02 -5.3080907E+02 -5.3234696E+02
 -5.3387941E+02 -5.3540642E+02 -5.3692798E+02 -5.3844407E+02
 -5.3995468E+02 -5.4145981E+02 -5.4295944E+02 -5.4445357E+02
 -5.4594217E+02 -5.4742525E+02 -5.4890279E+02 -5.5037477E+02
 -5.5184120E+02 -5.5330205E+02 -5.5475732E+02 -5.5620699E+02
 -5.5765106E+02 -5.5908953E+02 -5.6052236E+02 -5.6194955E+02
 -5.6337110E+02 -5.6478699E+02 -5.6619722E+02 -5.6760176E+02
 -5.6900062E+02 -5.7039377E+02 -5.7178122E+02 -5.7316294E+02
 -5.7453893E+02 -5.7590918E+02 -5.7727367E+02 -5.7863240E+02
 -5.7998536E+02 -5.8133252E+02 -5.8267390E+02 -5.8400947E+02
 -5.8533921E+02 -5.8666313E+02 -5.8798121E+02 -5.8929344E+02
 -5.9059981E+02 -5.9190031E+02 -5.9319493E+02 -5.9448365E+02
 -5.9576647E+02 -5.9704337E+02 -5.9831435E+02 -5.9957940E+02
 -6.0083850E+02 -6.0209165E+02 -6.0333882E+02 -6.0458002E+02
 -6.0581523E+02 -6.0704444E+02 -6.0826763E+02 -6.0948482E+02
 -6.1069596E+02 -6.1190107E+02 -6.1310012E+02 -6.1429310E+02
 -6.1548002E+02 -6.1666085E+02 -6.1783558E+02 -6.1900421E+02
 -6.2016671E+02 -6.2132309E+02 -6.2247333E+02 -6.2361743E+02
 -6.2475536E+02 -6.2588712E+02 -6.2701271E+02 -6.2813210E+02
 -6.2924528E+02 -6.3035225E+02 -6.3145301E+02 -6.3254752E+02
 -6.3363579E+02 -6.3471780E+02 -6.3579355E+02 -6.3686302E+02
 -6.3792620E+02 -6.3898308E+02 -6.4003365E+02 -6.4107791E+02
 -6.4211582E+02 -6.4314740E+02 -6.4417263E+02 -6.4519150E+02
 -6.4620398E+02 -6.4721009E+02 -6.4820981E+02 -6.4920311E+02
 -6.5019000E+02 -6.5117046E+02 -6.5214449E+02 -6.5311206E+02
 -6.5407318E+02 -6.5502782E+02 -6.5597599E+02 -6.5691766E+02
 -6.5785283E+02 -6.5878149E+02 -6.5970363E+02 -6.6061923E+02
 -6.6152829E+02 -6.6243079E+02 -6.6332672E+02 -6.6421609E+02
 -6.6509886E+02 -6.6597503E+02 -6.6684460E+02 -6.6770754E+02
 -6.6856385E+02 -6.6941353E+02 -6.7025655E+02 -6.7109291E+02
 -6.7192260E+02 -6.7274560E+02 -6.7356191E+02 -6.7437152E+02
 -6.7517440E+02 -6.7597056E+02 -6.7675999E+02 -6.7754267E+02
 -6.7831858E+02 -6.7908773E+02 -6.7985010E+02 -6.8060567E+02
 -6.8135445E+02 -6.8209642E+02 -6.8283156E+02 -6.8355987E+02
 -6.8428133E+02 -6.8499594E+02 -6.8570369E+02 -6.8640455E+02
 -6.8709854E+02 -6.8778563E+02 -6.8846580E+02 -6.8913905E+02
 -6.8980538E+02 -6.9046477E+02 -6.9111721E+02 -6.9176268E+02
 -6.9240119E+02 -6.9303270E+02 -6.9365723E+02 -6.9427475E+02
 -6.9488525E+02 -6.9548873E+02 -6.9608518E+02 -6.9667457E+02
 -6.9725691E+02 -6.9783218E+02 -6.9840038E+02 -6.9896147E+02
 -6.9951548E+02 -7.0006236E+02 -7.0060213E+02 -7.0113476E+02
 -7.0166025E+02 -7.0217859E+02 -7.0268976E+02 -7.0319376E+02
 -7.0369057E+02 -7.0418018E+02 -7.0466259E+02 -7.0513778E+02
 -7.0560574E+02 -7.0606646E+02 -7.0651992E+02 -7.0696613E+02
 -7.0740507E+02 -7.0783672E+02 -7.0826108E+02 -7.0867814E+02
 -7.0908788E+02 -7.0949030E+02 -7.0988538E+02 -7.1027312E+02
 -7.1065349E+02 -7.1102651E+02 -7.1139214E+02 -7.1175038E+02
 -7.1210122E+02 -7.1244465E+02 -7.1278067E+02 -7.1310924E+02
 -7.1343038E+02 -7.1374406E+02 -7.1405028E+02 -7.1434902E+02
 -7.1464028E+02 -7.1492405E+02 -7.1520030E+02 -7.1546903E+02
 -7.1573024E+02 -7.1598392E+02 -7.1623004E+02 -7.1646860E+02
 -7.1669959E+02 -7.1692299E+02 -7.1713881E+02 -7.1734702E+02
 -7.1754762E+02 -7.1774060E+02 -7.1792594E+02 -7.1810363E+02
 -7.1827366E+02 -7.1843603E+02 -7.1859072E+02 -7.1873773E+02
 -7.1887703E+02 -7.1900862E+02 -7.1913250E+02 -7.1924864E+02
 -7.1935704E+02 -7.1945768E+02 -7.1955057E+02 -7.1963568E+02
 -7.1971301E+02 -7.1978253E+02 -7.1984426E+02 -7.1989816E+02
 -7.1994424E+02 -7.1998248E+02 -7.2001287E+02 -7.2003540E+02
 -7.2005006E+02 -7.2005684E+02 -7.2005573E+02 -7.2004672E+02
 -7.2002979E+02 -7.2000494E+02 -7.1997216E+02 -7.1993143E+02
 -7.1988275E+02 -7.1982609E+02 -7.1976146E+02 -7.1968884E+02
 -7.1960822E+02 -7.1951960E+02 -7.1942296E+02 -7.1931828E+02
 -7.1920556E+02 -7.1908479E+02 -7.1895596E+02 -7.1881906E+02
 -7.1867407E+02 -7.1852098E+02 -7.1835979E+02 -7.1819048E+02
 -7.1801305E+02 -7.1782748E+02 -7.1763376E+02 -7.1743188E+02
 -7.1722184E+02 -7.1700361E+02 -7.1677719E+02 -7.1654257E+02
 -7.1629973E+02 -7.1604868E+02 -7.1578939E+02 -7.1552186E+02
 -7.1524607E+02 -7.1496201E+02 -7.1466968E+02 -7.1436906E+02
 -7.1406014E+02 -7.1374292E+02 -7.1341737E+02 -7.1308349E+02
 -7.1274128E+02 -7.1239071E+02 -7.1203178E+02 -7.1166449E+02
 -7.1128880E+02 -7.1090472E+02 -7.1051224E+02 -7.1011133E+02
 -7.0970201E+02 -7.0928425E+02 -7.0885804E+02 -7.0842337E+02
 -7.0798023E+02 -7.0752861E+02 -7.0706851E+02 -7.0659989E+02
 -7.0612277E+02 -7.0563713E+02 -7.0514296E+02 -7.0464024E+02
 -7.0412897E+02 -7.0360913E+02 -7.0308071E+02 -7.0254371E+02
 -7.0199811E+02 -7.0144390E+02 -7.0088108E+02 -7.0030962E+02
 -6.9972953E+02 -6.9914078E+02 -6.9854337E+02 -6.9793730E+02
 -6.9732253E+02 -6.9669908E+02 -6.9606692E+02 -6.9542604E+02
 -6.9477644E+02 -6.9411811E+02 -6.9345102E+02 -6.9277518E+02
 -6.9209057E+02 -6.9139719E+02 -6.9069501E+02 -6.8998403E+02
 -6.8926424E+02 -6.8853563E+02 -6.8779819E+02 -6.8705190E+02
 -6.8629676E+02 -6.8553276E+02 -6.8475988E+02 -6.8397812E+02
 -6.8318745E+02 -6.8238788E+02 -6.8157940E+02 -6.8076198E+02
 -6.7993562E+02 -6.7910032E+02 -6.7825605E+02 -6.7740281E+02
 -6.7654060E+02 -6.7566938E+02 -6.7478917E+02 -6.7389994E+02
 -6.7300169E+02 -6.7209440E+02 -6.7117806E+02 -6.7025267E+02
 -6.6931820E+02 -6.6837467E+02 -6.6742204E+02 -6.6646031E+02
 -6.6548947E+02 -6.6450951E+02 -6.6352042E+02 -6.6252218E+02
 -6.6151480E+02 -6.6049825E+02 -6.5947253E+02 -6.5843762E+02
 -6.5739350E+02 -6.5634020E+02 -6.5527766E+02 -6.5420591E+02
 -6.5312491E+02 -6.5203466E+02 -6.5093516E+02 -6.4982638E+02
 -6.4870832E+02 -6.4758097E+02 -6.4644432E+02 -6.4529835E+02
 -6.4414306E+02 -6.4297844E+02 -6.4180447E+02 -6.4062114E+02
 -6.3942845E+02 -6.3822637E+02 -6.3701491E+02 -6.3579405E+02
 -6.3456378E+02 -6.3332409E+02 -6.3207497E+02 -6.3081641E+02
 -6.2954840E+02 -6.2827092E+02 -6.2698397E+02 -6.2568753E+02
 -6.2438160E+02 -6.2306616E+02 -6.2174121E+02 -6.2040673E+02
 -6.1906271E+02 -6.1770914E+02 -6.1634601E+02 -6.1497332E+02
 -6.1359104E+02 -6.1219917E+02 -6.1079770E+02 -6.0938661E+02
 -6.0796591E+02 -6.0653556E+02 -6.0509558E+02 -6.0364593E+02
 -6.0218663E+02 -6.0071764E+02 -5.9923897E+02 -5.9775059E+02
 -5.9625251E+02 -5.9474471E+02 -5.9322719E+02 -5.9169991E+02
 -5.9015627E+02 -5.8861973E+02 -5.8708787E+02 -5.8556066E+02
 -5.8403807E+02 -5.8252010E+02 -5.8100674E+02 -5.7949796E+02
 -5.7799375E+02 -5.7649409E+02 -5.7499897E+02 -5.7350837E+02
 -5.7202227E+02 -5.7054067E+02 -5.6906354E+02 -5.6759087E+02
 -5.6612265E+02 -5.6465886E+02 -5.6319948E+02 -5.6174450E+02
 -5.6029390E+02 -5.5884767E+02 -5.5740579E+02 -5.5596825E+02
 -5.5453504E+02 -5.5310613E+02 -5.5168152E+02 -5.5026119E+02
 -5.4884512E+02 -5.4743330E+02 -5.4602571E+02 -5.4462235E+02
 -5.4322319E+02 -5.4182822E+02 -5.4043744E+02 -5.3905082E+02
 -5.3766833E+02 -5.3629000E+02 -5.3491577E+02 -5.3354566E+02
 -5.3217964E+02 -5.3081770E+02 -5.2945982E+02 -5.2810599E+02
 -5.2675620E+02 -5.2541043E+02 -5.2406867E+02 -5.2273091E+02
 -5.2139713E+02 -5.2006732E+02 -5.1874146E+02 -5.1741955E+02
 -5.1610156E+02 -5.1478749E+02 -5.1347732E+02 -5.1217104E+02
 -5.1086864E+02 -5.0957009E+02 -5.0827540E+02 -5.0698454E+02
 -5.0569751E+02 -5.0441429E+02 -5.0313486E+02 -5.0185922E+02
 -5.0058734E+02 -4.9931924E+02 -4.9805487E+02 -4.9679423E+02
 -4.9553732E+02 -4.9428413E+02 -4.9303462E+02 -4.9178879E+02
 -4.9054664E+02 -4.8930815E+02 -4.8807330E+02 -4.8684209E+02
 -4.8561450E+02 -4.8439052E+02 -4.8317014E+02 -4.8195334E+02
 -4.8074012E+02 -4.7953046E+02 -4.7832434E+02 -4.7712176E+02
 -4.7592272E+02 -4.7472719E+02 -4.7353515E+02 -4.7234661E+02
 -4.7116154E+02 -4.6997995E+02 -4.6880181E+02 -4.6762712E+02
 -4.6645585E+02 -4.6528801E+02 -4.6412357E+02 -4.6296254E+02
 -4.6180490E+02 -4.6065062E+02 -4.5949972E+02 -4.5835217E+02
 -4.5720795E+02 -4.5606707E+02 -4.5492951E+02 -4.5379526E+02
 -4.5266431E+02 -4.5153664E+02 -4.5041225E+02 -4.4929112E+02
 -4.4817326E+02 -4.4705863E+02 -4.4594723E+02 -4.4483906E+02
 -4.4373410E+02 -4.4263234E+02 -4.4153377E+02 -4.4043838E+02
 -4.3934616E+02 -4.3825709E+02 -4.3717118E+02 -4.3608841E+02
 -4.3500875E+02 -4.3393223E+02 -4.3285880E+02 -4.3178847E+02
 -4.3072123E+02 -4.2965707E+02 -4.2859597E+02 -4.2753792E+02
 -4.2648293E+02 -4.2543096E+02 -4.2438203E+02 -4.2333611E+02
 -4.2229319E+02 -4.2125328E+02 -4.2021635E+02 -4.1918240E+02
 -4.1815141E+02 -4.1712338E+02 -4.1609829E+02 -4.1507615E+02
 -4.1405693E+02 -4.1304063E+02 -4.1202725E+02 -4.1101676E+02
 -4.1000915E+02 -4.0900444E+02 -4.0800259E+02 -4.0700360E+02
 -4.0600747E+02 -4.0501418E+02 -4.0402373E+02 -4.0303610E+02
 -4.0205128E+02 -4.0106927E+02 -4.0009006E+02 -3.9911363E+02
 -3.9813998E+02 -3.9716911E+02 -3.9620099E+02 -3.9523563E+02
 -3.9427301E+02 -3.9331313E+02 -3.9235597E+02 -3.9140153E+02
 -3.9044979E+02 -3.8950076E+02 -3.8855441E+02 -3.8761074E+02
 -3.8666975E+02 -3.8573142E+02 -3.8479575E+02 -3.8386272E+02
 -3.8293233E+02 -3.8200457E+02 -3.8107944E+02 -3.8015692E+02
 -3.7923700E+02 -3.7831967E+02 -3.7740494E+02 -3.7649278E+02
 -3.7558319E+02 -3.7467617E+02 -3.7377170E+02 -3.7286978E+02
 -3.7197040E+02 -3.7107354E+02 -3.7017921E+02 -3.6928739E+02
 -3.6839808E+02 -3.6751127E+02 -3.6662694E+02 -3.6574509E+02
 -3.6486572E+02 -3.6398882E+02 -3.6311437E+02 -3.6224237E+02
 -3.6137282E+02 -3.6050570E+02 -3.5964101E+02 -3.5877872E+02
 -3.5791886E+02 -3.5706140E+02 -3.5620634E+02 -3.5535365E+02
 -3.5450336E+02 -3.5365544E+02 -3.5280988E+02 -3.5196668E+02
 -3.5112582E+02 -3.5028731E+02 -3.4945114E+02 -3.4861730E+02
 -3.4778577E+02 -3.4695656E+02 -3.4612965E+02 -3.4530504E+02
 -3.4448272E+02 -3.4366269E+02 -3.4284493E+02 -3.4202944E+02
 -3.4121621E+02 -3.4040525E+02 -3.3959652E+02 -3.3879004E+02
 -3.3798579E+02 -3.3718377E+02 -3.3638396E+02 -3.3558638E+02
 -3.3479099E+02 -3.3399780E+02 -3.3320681E+02 -3.3241800E+02
 -3.3163136E+02 -3.3084690E+02 -3.3006461E+02 -3.2928446E+02
 -3.2850647E+02 -3.2773063E+02 -3.2695692E+02 -3.2618534E+02
 -3.2541588E+02 -3.2464854E+02 -3.2388332E+02 -3.2312019E+02
 -3.2235916E+02 -3.2160023E+02 -3.2084337E+02 -3.2008859E+02
 -3.1933589E+02 -3.1858524E+02 -3.1783666E+02 -3.1709012E+02
 -3.1634564E+02 -3.1560319E+02 -3.1486277E+02 -3.1412438E+02
 -3.1338800E+02 -3.1265365E+02 -3.1192130E+02 -3.1119094E+02
 -3.1046258E+02 -3.0973622E+02 -3.0901183E+02 -3.0828941E+02
 -3.0756897E+02 -3.0685049E+02 -3.0613397E+02 -3.0541940E+02
 -3.0470678E+02 -3.0399609E+02 -3.0328733E+02 -3.0258051E+02
 -3.0187561E+02 -3.0117262E+02 -3.0047153E+02 -2.9977236E+02
 -2.9907508E+02 -2.9837969E+02 -2.9768619E+02 -2.9699456E+02
 -2.9630482E+02 -2.9561693E+02 -2.9493092E+02 -2.9424675E+02
 -2.9356445E+02 -2.9288398E+02 -2.9220535E+02 -2.9152856E+02
 -2.9085359E+02 -2.9018045E+02 -2.8950913E+02 -2.8883961E+02
 -2.8817190E+02 -2.8750600E+02 -2.8684188E+02 -2.8617956E+02
 -2.8551902E+02 -2.8486025E+02 -2.8420326E+02 -2.8354804E+02
 -2.8289458E+02 -2.8224287E+02 -2.8159292E+02 -2.8094471E+02
 -2.8029824E+02 -2.7965351E+02 -2.7901050E+02 -2.7836922E+02
 -2.7772966E+02 -2.7709181E+02 -2.7645567E+02 -2.7582124E+02
 -2.7518850E+02 -2.7455745E+02 -2.7392810E+02 -2.7330042E+02
 -2.7267442E+02 -2.7205010E+02 -2.7142744E+02 -2.7080644E+02
 -2.7018710E+02 -2.6956941E+02 -2.6895337E+02 -2.6833898E+02
 -2.6772621E+02 -2.6711508E+02 -2.6650558E+02 -2.6589770E+02
 -2.6529143E+02 -2.6468678E+02 -2.6408373E+02 -2.6348229E+02
 -2.6288244E+02 -2.6228419E+02 -2.6168753E+02 -2.6109245E+02
 -2.6049894E+02 -2.5990701E+02 -2.5931665E+02 -2.5872785E+02
 -2.5814061E+02 -2.5755492E+02 -2.5697079E+02 -2.5638820E+02
 -2.5580715E+02 -2.5522763E+02 -2.5464965E+02 -2.5407320E+02
 -2.5349826E+02 -2.5292485E+02 -2.5235294E+02 -2.5178255E+02
 -2.5121365E+02 -2.5064626E+02 -2.5008036E+02 -2.4951595E+02
 -2.4895303E+02 -2.4839159E+02 -2.4783162E+02 -2.4727313E+02
 -2.4671610E+02 -2.4616054E+02 -2.4560643E+02 -2.4505379E+02
 -2.4450259E+02 -2.4395283E+02 -2.4340452E+02 -2.4285765E+02
 -2.4231221E+02 -2.4176819E+02 -2.4122561E+02 -2.4068444E+02
 -2.4014469E+02 -2.3960635E+02 -2.3906942E+02 -2.3853389E+02
 -2.3799976E+02 -2.3746702E+02 -2.3693567E+02 -2.3640572E+02
 -2.3587714E+02 -2.3534994E+02 -2.3482412E+02 -2.3429966E+02
 -2.3377658E+02 -2.3325485E+02 -2.3273449E+02 -2.3221547E+02
 -2.3169781E+02 -2.3118149E+02 -2.3066651E+02 -2.3015288E+02
 -2.2964057E+02 -2.2912960E+02 -2.2861995E+02 -2.2811162E+02
 -2.2760462E+02 -2.2709892E+02 -2.2659453E+02 -2.2609145E+02
 -2.2558968E+02 -2.2508921E+02 -2.2459003E+02 -2.2409213E+02
 -2.2359553E+02 -2.2310021E+02 -2.2260617E+02 -2.2211341E+02
 -2.2162192E+02 -2.2113170E+02 -2.2064273E+02 -2.2015504E+02
 -2.1966860E+02 -2.1918341E+02 -2.1869947E+02 -2.1821678E+02
 -2.1773533E+02 -2.1725512E+02 -2.1677615E+02 -2.1629840E+02
 -2.1582189E+02 -2.1534659E+02 -2.1487253E+02 -2.1439967E+02
 -2.1392804E+02 -2.1345761E+02 -2.1298838E+02 -2.1252036E+02
 -2.1205354E+02 -2.1158792E+02 -2.1112348E+02 -2.1066023E+02
 -2.1019818E+02 -2.0973730E+02 -2.0927760E+02 -2.0881908E+02
 -2.0836173E+02 -2.0790554E+02 -2.0745053E+02 -2.0699667E+02
 -2.0654397E+02 -2.0609243E+02 -2.0564204E+02 -2.0519279E+02
 -2.0474469E+02 -2.0429773E+02 -2.0385191E+02 -2.0340722E+02
 -2.0296367E+02 -2.0252124E+02 -2.0207993E+02 -2.0163975E+02
 -2.0120069E+02 -2.0076275E+02 -2.0032591E+02 -1.9989018E+02
 -1.9945556E+02 -1.9902203E+02 -1.9858961E+02 -1.9815829E+02
 -1.9772806E+02 -1.9729892E+02 -1.9687085E+02 -1.9644388E+02
 -1.9601798E+02 -1.9559317E+02 -1.9516943E+02 -1.9474675E+02
 -1.9432514E+02 -1.9390460E+02 -1.9348513E+02 -1.9306670E+02
 -1.9264934E+02 -1.9223303E+02 -1.9181776E+02 -1.9140354E+02
 -1.9099037E+02 -1.9057823E+02 -1.9016713E+02 -1.8975707E+02
 -1.8934804E+02 -1.8894003E+02 -1.8853305E+02 -1.8812710E+02
 -1.8772216E+02 -1.8731824E+02 -1.8691533E+02 -1.8651344E+02
 -1.8611255E+02 -1.8571266E+02 -1.8531378E+02 -1.8491590E+02
 -1.8451901E+02 -1.8412312E+02 -1.8372822E+02 -1.8333431E+02
 -1.8294137E+02 -1.8254943E+02 -1.8215846E+02 -1.8176847E+02
 -1.8137945E+02 -1.8099140E+02 -1.8060433E+02 -1.8021821E+02
 -1.7983307E+02 -1.7944887E+02 -1.7906564E+02 -1.7868336E+02
 -1.7830204E+02 -1.7792166E+02 -1.7754223E+02 -1.7716374E+02
 -1.7678619E+02 -1.7640959E+02 -1.7603391E+02 -1.7565917E+02
 -1.7528537E+02 -1.7491248E+02 -1.7454053E+02 -1.7416949E+02
 -1.7379938E+02 -1.7343018E+02 -1.7306190E+02 -1.7269453E+02
 -1.7232807E+02 -1.7196251E+02 -1.7159787E+02 -1.7123412E+02
 -1.7087127E+02 -1.7050932E+02 -1.7014826E+02 -1.6978810E+02
 -1.6942882E+02 -1.6907043E+02 -1.6871293E+02 -1.6835630E+02
 -1.6800056E+02 -1.6764569E+02 -1.6729169E+02 -1.6693857E+02
 -1.6658632E+02 -1.6623494E+02 -1.6588442E+02 -1.6553475E+02
 -1.6518596E+02 -1.6483801E+02 -1.6449092E+02 -1.6414469E+02
 -1.6379930E+02 -1.6345476E+02 -1.6311107E+02 -1.6276822E+02
 -1.6242621E+02 -1.6208504E+02 -1.6174470E+02 -1.6140520E+02
 -1.6106653E+02 -1.6072868E+02 -1.6039167E+02 -1.6005548E+02
 -1.5972011E+02 -1.5938555E+02 -1.5905183E+02 -1.5871890E+02
 -1.5838680E+02 -1.5805550E+02 -1.5772502E+02 -1.5739534E+02
 -1.5706646E+02 -1.5673838E+02 -1.5641111E+02 -1.5608462E+02
 -1.5575894E+02 -1.5543405E+02 -1.5510995E+02 -1.5478663E+02
 -1.5446411E+02 -1.5414236E+02 -1.5382139E+02 -1.5350121E+02
 -1.5318181E+02 -1.5286318E+02 -1.5254532E+02 -1.5222823E+02
 -1.5191192E+02 -1.5159636E+02 -1.5128157E+02 -1.5096755E+02
 -1.5065429E+02 -1.5034178E+02 -1.5003003E+02 -1.4971903E+02
 -1.4940878E+02 -1.4909929E+02 -1.4879054E+02 -1.4848254E+02
 -1.4817528E+02 -1.4786876E+02 -1.4756299E+02 -1.4725795E+02
 -1.4695364E+02 -1.4665007E+02 -1.4634724E+02 -1.4604512E+02
 -1.4574374E+02 -1.4544308E+02 -1.4514315E+02 -1.4484394E+02
 -1.4454545E+02 -1.4424767E+02 -1.4395061E+02 -1.4365426E+02
 -1.4335862E+02 -1.4306370E+02 -1.4276948E+02 -1.4247597E+02
 -1.4218316E+02 -1.4189105E+02 -1.4159965E+02 -1.4130893E+02
 -1.4101892E+02 -1.4072960E+02 -1.4044098E+02 -1.4015304E+02
 -1.3986579E+02 -1.3957923E+02 -1.3929335E+02 -1.3900817E+02
 -1.3872365E+02 -1.3843982E+02 -1.3815666E+02 -1.3787418E+02
 -1.3759238E+02 -1.3731124E+02 -1.3703077E+02 -1.3675097E+02
 -1.3647185E+02 -1.3619338E+02 -1.3591557E+02 -1.3563843E+02
 -1.3536194E+02 -1.3508612E+02 -1.3481095E+02 -1.3453643E+02
 -1.3426256E+02 -1.3398935E+02 -1.3371678E+02 -1.3344486E+02
 -1.3317359E+02 -1.3290296E+02 -1.3263296E+02 -1.3236362E+02
 -1.3209490E+02 -1.3182683E+02 -1.3155938E+02 -1.3129257E+02
 -1.3102640E+02 -1.3076084E+02 -1.3049592E+02 -1.3023163E+02
 -1.2996796E+02 -1.2970491E+02 -1.2944248E+02 -1.2918068E+02
 -1.2891948E+02 -1.2865891E+02 -1.2839894E+02 -1.2813960E+02
 -1.2788086E+02 -1.2762273E+02 -1.2736521E+02 -1.2710830E+02
 -1.2685199E+02 -1.2659628E+02 -1.2634118E+02 -1.2608667E+02
 -1.2583277E+02 -1.2557945E+02 -1.2532673E+02 -1.2507461E+02
 -1.2482308E+02 -1.2457214E+02 -1.2432178E+02 -1.2407201E+02
 -1.2382283E+02 -1.2357423E+02 -1.2332621E+02 -1.2307878E+02
 -1.2283193E+02 -1.2258564E+02 -1.2233994E+02 -1.2209481E+02
 -1.2185025E+02 -1.2160627E+02 -1.2136286E+02 -1.2112001E+02
 -1.2087773E+02 -1.2063601E+02 -1.2039486E+02 -1.2015427E+02
 -1.1991424E+02 -1.1967477E+02 -1.1943586E+02 -1.1919751E+02
 -1.1895971E+02 -1.1872246E+02 -1.1848577E+02 -1.1824962E+02
 -1.1801402E+02 -1.1777897E+02 -1.1754447E+02 -1.1731052E+02
 -1.1707710E+02 -1.1684423E+02 -1.1661189E+02 -1.1638010E+02
 -1.1614884E+02 -1.1591812E+02 -1.1568794E+02 -1.1545828E+02
 -1.1522916E+02 -1.1500057E+02 -1.1477250E+02 -1.1454497E+02
 -1.1431796E+02 -1.1409148E+02 -1.1386551E+02 -1.1364008E+02
 -1.1341516E+02 -1.1319076E+02 -1.1296688E+02 -1.1274351E+02
 -1.1252066E+02 -1.1229833E+02 -1.1207650E+02 -1.1185519E+02
 -1.1163439E+02 -1.1141409E+02 -1.1119430E+02 -1.1097502E+02
 -1.1075624E+02 -1.1053797E+02 -1.1032019E+02 -1.1010293E+02
 -1.0988615E+02 -1.0966988E+02 -1.0945409E+02 -1.0923881E+02
 -1.0902402E+02 -1.0880972E+02 -1.0859591E+02 -1.0838260E+02
 -1.0816977E+02 -1.0795743E+02 -1.0774558E+02 -1.0753421E+02
 -1.0732332E+02 -1.0711292E+02 -1.0690300E+02 -1.0669355E+02
 -1.0648459E+02 -1.0627610E+02 -1.0606809E+02 -1.0586056E+02
 -1.0565349E+02 -1.0544690E+02 -1.0524079E+02 -1.0503514E+02
 -1.0482996E+02 -1.0462524E+02 -1.0442100E+02 -1.0421722E+02
 -1.0401390E+02 -1.0381104E+02 -1.0360865E+02 -1.0340672E+02
 -1.0320524E+02 -1.0300423E+02 -1.0280366E+02 -1.0260356E+02
 -1.0240391E+02 -1.0220471E+02 -1.0200597E+02 -1.0180768E+02
 -1.0160983E+02 -1.0141244E+02 -1.0121549E+02 -1.0101899E+02
 -1.0082292E+02 -1.0062731E+02 -1.0043214E+02 -1.0023741E+02
 -1.0004312E+02 -9.9849270E+01 -9.9655853E+01 -9.9462878E+01
 -9.9270338E+01 -9.9078233E+01 -9.8886563E+01 -9.8695320E+01
 -9.8504513E+01 -9.8314140E+01 -9.8124188E+01 -9.7934670E+01
 -9.7745573E+01 -9.7556910E+01 -9.7368668E+01 -9.7180845E+01
 -9.6993450E+01 -9.6806475E+01 -9.6619920E+01 -9.6433785E+01
 -9.6248063E+01 -9.6062768E+01 -9.5877885E+01 -9.5693415E+01
 -9.5509358E+01 -9.5325713E+01 -9.5142488E+01 -9.4959668E+01
 -9.4777253E+01 -9.4595250E+01 -9.4413660E+01 -9.4232475E+01
 -9.4051688E+01 -9.3871313E+01 -9.3691343E+01 -9.3511770E+01
 -9.3332595E+01 -9.3153833E+01 -9.2975460E+01 -9.2797485E+01
 -9.2619915E+01 -9.2442735E+01 -9.2265953E+01 -9.2089560E+01
 -9.1913565E+01 -9.1737968E+01 -9.1562753E+01 -9.1387935E+01
 -9.1213500E+01 -9.1039455E+01 -9.0865800E+01 -9.0692528E+01
 -9.0519645E+01 -9.0347145E+01 -9.0175028E+01 -9.0003293E+01
 -8.9831940E+01 -8.9660963E+01 -8.9490375E+01 -8.9320155E+01
 -8.9150318E+01 -8.8980863E+01 -8.8811775E+01 -8.8643063E+01
 -8.8474733E+01 -8.8306770E+01 -8.8139175E+01 -8.7971955E+01
 -8.7805103E+01 -8.7638625E+01 -8.7472508E+01 -8.7306765E+01
 -8.7141383E+01 -8.6976368E+01 -8.6811720E+01 -8.6647433E+01
 -8.6483505E+01 -8.6319945E+01 -8.6156745E+01 -8.5993905E+01
 -8.5831418E+01 -8.5669298E+01 -8.5507530E+01 -8.5346115E+01
 -8.5185060E+01 -8.5024365E+01 -8.4864015E+01 -8.4704018E+01
 -8.4544373E+01 -8.4385080E+01 -8.4226140E+01 -8.4067545E+01
 -8.3909303E+01 -8.3751405E+01 -8.3593853E+01 -8.3436653E+01
 -8.3279790E+01 -8.3123273E+01 -8.2967100E+01 -8.2811273E+01
 -8.2655783E+01 -8.2500630E+01 -8.2345823E+01 -8.2191353E+01
 -8.2037220E+01 -8.1883418E+01 -8.1729960E+01 -8.1576840E+01
 -8.1424050E+01 -8.1271590E+01 -8.1119468E+01 -8.0967683E+01
 -8.0816220E+01 -8.0665088E+01 -8.0514293E+01 -8.0363820E+01
 -8.0213678E+01 -8.0063865E+01 -7.9914375E+01 -7.9765208E+01
 -7.9616370E+01 -7.9467855E+01 -7.9319663E+01 -7.9171793E+01
 -7.9024245E+01 -7.8877020E+01 -7.8730110E+01 -7.8583523E+01
 -7.8437258E+01 -7.8291300E+01 -7.8145665E+01 -7.8000345E+01
 -7.7855340E+01 -7.7710650E+01 -7.7566275E+01 -7.7422215E+01
 -7.7278463E+01 -7.7135018E+01 -7.6991888E+01 -7.6849073E+01
 -7.6706558E+01 -7.6564358E+01 -7.6422465E+01 -7.6280873E+01
 -7.6139588E+01 -7.5998610E+01 -7.5857940E+01 -7.5717570E+01
 -7.5577508E+01 -7.5437738E+01 -7.5298275E+01 -7.5159113E+01
 -7.5020250E+01 -7.4881691E+01 -7.4743427E+01 -7.4605460E+01
 -7.4467790E+01 -7.4330417E+01 -7.4193339E+01 -7.4056556E+01
 -7.3920068E+01 -7.3783872E+01 -7.3647970E+01 -7.3512359E+01
 -7.3377039E+01 -7.3242011E+01 -7.3107271E+01 -7.2972821E+01
 -7.2838659E+01 -7.2704786E+01 -7.2571198E+01 -7.2437897E+01
 -7.2304882E+01 -7.2172152E+01 -7.2039706E+01 -7.1907543E+01
 -7.1775663E+01 -7.1644065E+01 -7.1512749E+01 -7.1381713E+01
 -7.1250957E+01 -7.1120481E+01 -7.0990283E+01 -7.0860364E+01
 -7.0730721E+01 -7.0601356E+01 -7.0472266E+01 -7.0343452E+01
 -7.0214912E+01 -7.0086646E+01 -6.9958653E+01 -6.9830933E+01
 -6.9703485E+01 -6.9576308E+01 -6.9449402E+01 -6.9322766E+01
 -6.9196399E+01 -6.9070301E+01 -6.8944471E+01 -6.8818908E+01
 -6.8693612E+01 -6.8568582E+01 -6.8443817E+01 -6.8319317E+01
 -6.8195081E+01 -6.8071109E+01 -6.7947400E+01 -6.7823953E+01
 -6.7700767E+01 -6.7577843E+01 -6.7455178E+01 -6.7332773E+01
 -6.7210628E+01 -6.7088741E+01 -6.6967112E+01 -6.6845739E+01
 -6.6724624E+01 -6.6603764E+01 -6.6483160E+01 -6.6362810E+01
 -6.6242714E+01 -6.6122873E+01 -6.6003284E+01 -6.5883947E+01
 -6.5764861E+01 -6.5646027E+01 -6.5527443E+01 -6.5409109E+01
 -6.5291024E+01 -6.5173188E+01 -6.5055600E+01 -6.4938260E+01
 -6.4821166E+01 -6.4704318E+01 -6.4587716E+01 -6.4471360E+01
 -6.4355248E+01 -6.4239379E+01 -6.4123754E+01 -6.4008372E+01
 -6.3893231E+01 -6.3778333E+01 -6.3663675E+01 -6.3549258E+01
 -6.3435080E+01 -6.3321143E+01 -6.3207443E+01 -6.3093982E+01
 -6.2980758E+01 -6.2867771E+01 -6.2755021E+01 -6.2642506E+01
 -6.2530227E+01 -6.2418182E+01 -6.2306372E+01 -6.2194795E+01
 -6.2083451E+01 -6.1972340E+01 -6.1861460E+01 -6.1750813E+01
 -6.1640396E+01 -6.1530209E+01 -6.1420251E+01 -6.1310523E+01
 -6.1201024E+01 -6.1091753E+01 -6.0982709E+01 -6.0873893E+01
 -6.0765302E+01 -6.0656938E+01 -6.0548799E+01 -6.0440885E+01
 -6.0333195E+01 -6.0225729E+01 -6.0118487E+01 -6.0011466E+01
 -5.9904668E+01 -5.9798093E+01 -5.9691737E+01 -5.9585603E+01
 -5.9479689E+01 -5.9373995E+01 -5.9268518E+01 -5.9163262E+01
 -5.9058223E+01 -5.8953401E+01 -5.8848797E+01 -5.8744409E+01
 -5.8640237E+01 -5.8536280E+01 -5.8432538E+01 -5.8329011E+01
 -5.8225697E+01 -5.8122597E+01 -5.8019711E+01 -5.7917036E+01
 -5.7814573E+01 -5.7712322E+01 -5.7610282E+01 -5.7508451E+01
 -5.7406832E+01 -5.7305421E+01 -5.7204220E+01 -5.7103226E+01
 -5.7002441E+01 -5.6901863E+01 -5.6801492E+01 -5.6701328E+01
 -5.6601370E+01 -5.6501618E+01 -5.6402070E+01 -5.6302727E+01
 -5.6203588E+01 -5.6104652E+01 -5.6005920E+01 -5.5907390E+01
 -5.5809062E+01 -5.5710937E+01 -5.5613012E+01 -5.5515289E+01
 -5.5417765E+01 -5.5320441E+01 -5.5223317E+01 -5.5126391E+01
 -5.5029665E+01 -5.4933135E+01 -5.4836804E+01 -5.4740669E+01
 -5.4644731E+01 -5.4548989E+01 -5.4453443E+01 -5.4358091E+01
 -5.4262935E+01 -5.4167973E+01 -5.4073205E+01 -5.3978630E+01
 -5.3884248E+01 -5.3790059E+01 -5.3696061E+01 -5.3602255E+01
 -5.3508641E+01 -5.3415216E+01 -5.3321983E+01 -5.3228939E+01
 -5.3136084E+01 -5.3043418E+01 -5.2950941E+01 -5.2858652E+01
 -5.2766550E+01 -5.2674635E+01 -5.2582908E+01 -5.2491367E+01
 -5.2400011E+01 -5.2308841E+01 -5.2217856E+01 -5.2127055E+01
 -5.2036439E+01 -5.1946007E+01 -5.1855758E+01 -5.1765691E+01
 -5.1675807E+01 -5.1586105E+01 -5.1496585E+01 -5.1407246E+01
 -5.1318087E+01 -5.1229109E+01 -5.1140311E+01 -5.1051692E+01
 -5.0963253E+01 -5.0874992E+01 -5.0786909E+01 -5.0699005E+01
 -5.0611278E+01 -5.0523728E+01 -5.0436354E+01 -5.0349157E+01
 -5.0262136E+01 -5.0175290E+01 -5.0088619E+01 -5.0002122E+01
 -4.9915800E+01 -4.9829651E+01 -4.9743677E+01 -4.9657875E+01
 -4.9572245E+01 -4.9486788E+01 -4.9401503E+01 -4.9316390E+01
 -4.9231447E+01 -4.9146674E+01 -4.9062072E+01 -4.8977640E+01
 -4.8893378E+01 -4.8809285E+01 -4.8725360E+01 -4.8641603E+01
 -4.8558014E+01 -4.8474593E+01 -4.8391340E+01 -4.8308252E+01
 -4.8225332E+01 -4.8142577E+01 -4.8059988E+01 -4.7977564E+01
 -4.7895305E+01 -4.7813210E+01 -4.7731280E+01 -4.7649513E+01
 -4.7567910E+01 -4.7486470E+01 -4.7405192E+01 -4.7324077E+01
 -4.7243123E+01 -4.7162331E+01 -4.7081701E+01 -4.7001230E+01
 -4.6920921E+01 -4.6840772E+01 -4.6760781E+01 -4.6680951E+01
 -4.6601279E+01 -4.6521766E+01 -4.6442411E+01 -4.6363214E+01
 -4.6284175E+01 -4.6205293E+01 -4.6126568E+01 -4.6047998E+01
 -4.5969585E+01 -4.5891328E+01 -4.5813227E+01 -4.5735280E+01
 -4.5657488E+01 -4.5579850E+01 -4.5502366E+01 -4.5425036E+01
 -4.5347859E+01 -4.5270835E+01 -4.5193964E+01 -4.5117245E+01
 -4.5040677E+01 -4.4964262E+01 -4.4887997E+01 -4.4811884E+01
 -4.4735921E+01 -4.4660108E+01 -4.4584445E+01 -4.4508931E+01
 -4.4433567E+01 -4.4358351E+01 -4.4283284E+01 -4.4208365E+01
 -4.4133594E+01 -4.4058971E+01 -4.3984495E+01 -4.3910165E+01
 -4.3835982E+01 -4.3761945E+01 -4.3688054E+01 -4.3614309E+01
 -4.3540709E+01 -4.3467253E+01 -4.3393942E+01 -4.3320776E+01
 -4.3247753E+01 -4.3174874E+01 -4.3102138E+01 -4.3029545E+01
 -4.2957094E+01 -4.2884786E+01 -4.2812620E+01 -4.2740595E+01
 -4.2668712E+01 -4.2596969E+01 -4.2525368E+01 -4.2453907E+01
 -4.2382586E+01 -4.2311405E+01 -4.2240362E+01 -4.2169460E+01
 -4.2098696E+01 -4.2028070E+01 -4.1957583E+01 -4.1887233E+01
 -4.1817021E+01 -4.1746947E+01 -4.1677010E+01 -4.1607209E+01
 -4.1537543E+01 -4.1468015E+01 -4.1398622E+01 -4.1329365E+01
 -4.1260243E+01 -4.1191255E+01 -4.1122402E+01 -4.1053684E+01
 -4.0985099E+01 -4.0916648E+01 -4.0848330E+01 -4.0780145E+01
 -4.0712093E+01 -4.0644174E+01 -4.0576386E+01 -4.0508731E+01
 -4.0441207E+01 -4.0373814E+01 -4.0306553E+01 -4.0239422E+01
 -4.0172421E+01 -4.0105551E+01 -4.0038810E+01 -3.9972199E+01
 -3.9905717E+01 -3.9839365E+01 -3.9773141E+01 -3.9707045E+01
 -3.9641077E+01 -3.9575237E+01 -3.9509525E+01 -3.9443940E+01
 -3.9378482E+01 -3.9313151E+01 -3.9247946E+01 -3.9182867E+01
 -3.9117914E+01 -3.9053087E+01 -3.8988384E+01 -3.8923808E+01
 -3.8859355E+01 -3.8795027E+01 -3.8730824E+01 -3.8666744E+01
 -3.8602788E+01 -3.8538956E+01 -3.8475246E+01 -3.8411659E+01
 -3.8348195E+01 -3.8284853E+01 -3.8221634E+01 -3.8158535E+01
 -3.8095559E+01 -3.8032703E+01 -3.7969970E+01 -3.7907356E+01
 -3.7844862E+01 -3.7782489E+01 -3.7720236E+01 -3.7658102E+01
 -3.7596089E+01 -3.7534193E+01 -3.7472417E+01 -3.7410760E+01
 -3.7349220E+01 -3.7287799E+01 -3.7226496E+01 -3.7165310E+01
 -3.7104242E+01 -3.7043290E+01 -3.6982455E+01 -3.6921737E+01
 -3.6861135E+01 -3.6800649E+01 -3.6740279E+01 -3.6680024E+01
 -3.6619885E+01 -3.6559861E+01 -3.6499951E+01 -3.6440156E+01
 -3.6380475E+01 -3.6320908E+01 -3.6261455E+01 -3.6202115E+01
 -3.6142889E+01 -3.6083776E+01 -3.6024775E+01 -3.5965887E+01
 -3.5907111E+01 -3.5848448E+01 -3.5789895E+01 -3.5731455E+01
 -3.5673126E+01 -3.5614908E+01 -3.5556800E+01 -3.5498804E+01
 -3.5440918E+01 -3.5383142E+01 -3.5325475E+01 -3.5267918E+01
 -3.5210471E+01 -3.5153132E+01 -3.5095903E+01 -3.5038783E+01
 -3.4981770E+01 -3.4924866E+01 -3.4868070E+01 -3.4811382E+01
 -3.4754801E+01 -3.4698327E+01 -3.4641961E+01 -3.4585701E+01
 -3.4529548E+01 -3.4473501E+01 -3.4417560E+01 -3.4361726E+01
 -3.4305996E+01 -3.4250372E+01 -3.4194854E+01 -3.4139440E+01
 -3.4084131E+01 -3.4028927E+01 -3.3973826E+01 -3.3918830E+01
 -3.3863938E+01 -3.3809150E+01 -3.3754464E+01 -3.3699882E+01
 -3.3645403E+01 -3.3591027E+01 -3.3536753E+01 -3.3482582E+01
 -3.3428512E+01 -3.3374544E+01 -3.3320678E+01 -3.3266913E+01
 -3.3213250E+01 -3.3159687E+01 -3.3106226E+01 -3.3052864E+01
 -3.2999603E+01 -3.2946443E+01 -3.2893382E+01 -3.2840420E+01
 -3.2787558E+01 -3.2734796E+01 -3.2682132E+01 -3.2629568E+01
 -3.2577101E+01 -3.2524733E+01 -3.2472464E+01 -3.2420292E+01
 -3.2368219E+01 -3.2316242E+01 -3.2264363E+01 -3.2212582E+01
 -3.2160897E+01 -3.2109308E+01 -3.2057817E+01 -3.2006422E+01
 -3.1955123E+01 -3.1903919E+01 -3.1852811E+01 -3.1801799E+01
 -3.1750883E+01 -3.1700061E+01 -3.1649334E+01 -3.1598702E+01
 -3.1548164E+01 -3.1497721E+01 -3.1447372E+01 -3.1397116E+01
 -3.1346954E+01 -3.1296886E+01 -3.1246911E+01 -3.1197029E+01
 -3.1147240E+01 -3.1097543E+01 -3.1047939E+01 -3.0998428E+01
 -3.0949008E+01 -3.0899681E+01 -3.0850445E+01 -3.0801300E+01
 -3.0752247E+01 -3.0703285E+01 -3.0654414E+01 -3.0605633E+01
 -3.0556943E+01 -3.0508344E+01 -3.0459835E+01 -3.0411416E+01
 -3.0363086E+01 -3.0314846E+01 -3.0266695E+01 -3.0218633E+01
 -3.0170661E+01 -3.0122777E+01 -3.0074983E+01 -3.0027276E+01
 -2.9979658E+01 -2.9932128E+01 -2.9884685E+01 -2.9837331E+01
 -2.9790064E+01 -2.9742884E+01 -2.9695792E+01 -2.9648786E+01
 -2.9601867E+01 -2.9555035E+01 -2.9508289E+01 -2.9461630E+01
 -2.9415056E+01 -2.9368568E+01 -2.9322167E+01 -2.9275850E+01
 -2.9229619E+01 -2.9183473E+01 -2.9137412E+01 -2.9091436E+01
 -2.9045544E+01 -2.8999737E+01 -2.8954014E+01 -2.8908376E+01
 -2.8862821E+01 -2.8817349E+01 -2.8771962E+01 -2.8726658E+01
 -2.8681436E+01 -2.8636298E+01 -2.8591244E+01 -2.8546271E+01
 -2.8501381E+01 -2.8456574E+01 -2.8411848E+01 -2.8367204E+01
 -2.8322643E+01 -2.8278163E+01 -2.8233764E+01 -2.8189447E+01
 -2.8145211E+01 -2.8101056E+01 -2.8056982E+01 -2.8012988E+01
 -2.7969075E+01 -2.7925242E+01 -2.7881489E+01 -2.7837816E+01
 -2.7794223E+01 -2.7750710E+01 -2.7707276E+01 -2.7663921E+01
 -2.7620645E+01 -2.7577449E+01 -2.7534331E+01 -2.7491291E+01
 -2.7448331E+01 -2.7405449E+01 -2.7362645E+01 -2.7319918E+01
 -2.7277269E+01 -2.7234698E+01 -2.7192206E+01 -2.7149789E+01
 -2.7107450E+01 -2.7065189E+01 -2.7023003E+01 -2.6980895E+01
 -2.6938864E+01 -2.6896908E+01 -2.6855029E+01 -2.6813226E+01
 -2.6771498E+01 -2.6729847E+01 -2.6688272E+01 -2.6646771E+01
 -2.6605346E+01 -2.6563995E+01 -2.6522720E+01 -2.6481520E+01
 -2.6440394E+01 -2.6399343E+01 -2.6358366E+01 -2.6317463E+01
 -2.6276635E+01 -2.6235880E+01 -2.6195199E+01 -2.6154592E+01
 -2.6114057E+01 -2.6073597E+01 -2.6033210E+01 -2.5992895E+01
 -2.5952653E+01 -2.5912484E+01 -2.5872387E+01 -2.5832363E+01
 -2.5792410E+01 -2.5752530E+01 -2.5712723E+01 -2.5672986E+01
 -2.5633322E+01 -2.5593728E+01 -2.5554206E+01 -2.5514756E+01
 -2.5475376E+01 -2.5436067E+01 -2.5396829E+01 -2.5357661E+01
 -2.5318565E+01 -2.5279538E+01 -2.5240581E+01 -2.5201695E+01
 -2.5162878E+01 -2.5124132E+01 -2.5085454E+01 -2.5046846E+01
 -2.5008308E+01 -2.4969838E+01 -2.4931438E+01 -2.4893106E+01
 -2.4854843E+01 -2.4816650E+01 -2.4778524E+01 -2.4740466E+01
 -2.4702477E+01 -2.4664556E+01 -2.4626703E+01 -2.4588917E+01
 -2.4551199E+01 -2.4513549E+01 -2.4475966E+01 -2.4438450E+01
 -2.4401001E+01 -2.4363620E+01 -2.4326305E+01 -2.4289056E+01
 -2.4251874E+01 -2.4214759E+01 -2.4177710E+01 -2.4140726E+01
 -2.4103809E+01 -2.4066958E+01 -2.4030173E+01 -2.3993453E+01
 -2.3956798E+01 -2.3920209E+01 -2.3883685E+01 -2.3847226E+01
 -2.3810831E+01 -2.3774502E+01 -2.3738237E+01 -2.3702038E+01
 -2.3665902E+01 -2.3629830E+01 -2.3593823E+01 -2.3557880E+01
 -2.3522000E+01 -2.3486184E+01 -2.3450432E+01 -2.3414744E+01
 -2.3379119E+01 -2.3343556E+01 -2.3308057E+01 -2.3272621E+01
 -2.3237248E+01 -2.3201937E+01 -2.3166689E+01 -2.3131504E+01
 -2.3096381E+01 -2.3061320E+01 -2.3026322E+01 -2.2991384E+01
 -2.2956509E+01 -2.2921696E+01 -2.2886944E+01 -2.2852254E+01
 -2.2817625E+01 -2.2783057E+01 -2.2748550E+01 -2.2714105E+01
 -2.2679720E+01 -2.2645396E+01 -2.2611132E+01 -2.2576929E+01
 -2.2542786E+01 -2.2508703E+01 -2.2474681E+01 -2.2440719E+01
 -2.2406816E+01 -2.2372973E+01 -2.2339190E+01 -2.2305466E+01
 -2.2271801E+01 -2.2238196E+01 -2.2204650E+01 -2.2171163E+01
 -2.2137735E+01 -2.2104366E+01 -2.2071056E+01 -2.2037804E+01
 -2.2004610E+01 -2.1971474E+01 -2.1938397E+01 -2.1905378E+01
 -2.1872417E+01 -2.1839514E+01 -2.1806669E+01 -2.1773881E+01
 -2.1741150E+01 -2.1708477E+01 -2.1675862E+01 -2.1643303E+01
 -2.1610802E+01 -2.1578357E+01 -2.1545969E+01 -2.1513638E+01
 -2.1481364E+01 -2.1449146E+01 -2.1416984E+01 -2.1384878E+01
 -2.1352829E+01 -2.1320836E+01 -2.1288899E+01 -2.1257018E+01
 -2.1225191E+01 -2.1193421E+01 -2.1161706E+01 -2.1130047E+01
 -2.1098443E+01 -2.1066893E+01 -2.1035399E+01 -2.1003960E+01
 -2.0972576E+01 -2.0941247E+01 -2.0909972E+01 -2.0878751E+01
 -2.0847584E+01 -2.0816473E+01 -2.0785415E+01 -2.0754411E+01
 -2.0723462E+01 -2.0692565E+01 -2.0661723E+01 -2.0630935E+01
 -2.0600200E+01 -2.0569518E+01 -2.0538890E+01 -2.0508314E+01
 -2.0477792E+01 -2.0447323E+01 -2.0416907E+01 -2.0386544E+01
 -2.0356232E+01 -2.0325974E+01 -2.0295769E+01 -2.0265615E+01
 -2.0235514E+01 -2.0205465E+01 -2.0175468E+01 -2.0145523E+01
 -2.0115630E+01 -2.0085788E+01 -2.0055998E+01 -2.0026260E+01
 -1.9996574E+01 -1.9966938E+01 -1.9937354E+01 -1.9907820E+01
 -1.9878338E+01 -1.9848907E+01 -1.9819526E+01 -1.9790197E+01
 -1.9760918E+01 -1.9731689E+01 -1.9702511E+01 -1.9673384E+01
 -1.9644306E+01 -1.9615279E+01 -1.9586301E+01 -1.9557374E+01
 -1.9528496E+01 -1.9499669E+01 -1.9470890E+01 -1.9442162E+01
 -1.9413482E+01 -1.9384852E+01 -1.9356272E+01 -1.9327740E+01
 -1.9299257E+01 -1.9270824E+01 -1.9242439E+01 -1.9214103E+01
 -1.9185816E+01 -1.9157577E+01 -1.9129388E+01 -1.9101245E+01
 -1.9073152E+01 -1.9045106E+01 -1.9017110E+01 -1.8989160E+01
 -1.8961259E+01 -1.8933405E+01 -1.8905600E+01 -1.8877841E+01
 -1.8850131E+01 -1.8822468E+01 -1.8794852E+01 -1.8767284E+01
 -1.8739762E+01 -1.8712288E+01 -1.8684860E+01 -1.8657480E+01
 -1.8630146E+01 -1.8602860E+01 -1.8575619E+01 -1.8548426E+01
 -1.8521278E+01 -1.8494177E+01 -1.8467123E+01 -1.8440114E+01
 -1.8413151E+01 -1.8386235E+01 -1.8359364E+01 -1.8332540E+01
 -1.8305760E+01 -1.8279026E+01 -1.8252339E+01 -1.8225696E+01
 -1.8199099E+01 -1.8172547E+01 -1.8146041E+01 -1.8119579E+01
 -1.8093162E+01 -1.8066791E+01 -1.8040464E+01 -1.8014182E+01
 -1.7987945E+01 -1.7961752E+01 -1.7935603E+01 -1.7909499E+01
 -1.7883440E+01 -1.7857424E+01 -1.7831453E+01 -1.7805526E+01
 -1.7779643E+01 -1.7753803E+01 -1.7728007E+01 -1.7702255E+01
 -1.7676548E+01 -1.7650883E+01 -1.7625261E+01 -1.7599684E+01
 -1.7574149E+01 -1.7548658E+01 -1.7523209E+01 -1.7497805E+01
 -1.7472442E+01 -1.7447123E+01 -1.7421846E+01 -1.7396612E+01
 -1.7371421E+01 -1.7346273E+01 -1.7321167E+01 -1.7296103E+01
 -1.7271081E+01 -1.7246102E+01 -1.7221165E+01 -1.7196270E+01
 -1.7171417E+01 -1.7146606E+01 -1.7121836E+01 -1.7097109E+01
 -1.7072423E+01 -1.7047778E+01 -1.7023175E+01 -1.6998614E+01
 -1.6974094E+01 -1.6949615E+01 -1.6925177E+01 -1.6900780E+01
 -1.6876424E+01 -1.6852110E+01 -1.6827836E+01 -1.6803603E+01
 -1.6779410E+01 -1.6755259E+01 -1.6731148E+01 -1.6707077E+01
 -1.6683047E+01 -1.6659057E+01 -1.6635107E+01 -1.6611197E+01
 -1.6587328E+01 -1.6563498E+01 -1.6539709E+01 -1.6515959E+01
 -1.6492249E+01 -1.6468579E+01 -1.6444949E+01 -1.6421357E+01
 -1.6397806E+01 -1.6374293E+01 -1.6350821E+01 -1.6327387E+01
 -1.6303992E+01 -1.6280637E+01 -1.6257320E+01 -1.6234043E+01
 -1.6210805E+01 -1.6187605E+01 -1.6164444E+01 -1.6141322E+01
 -1.6118238E+01 -1.6095193E+01 -1.6072186E+01 -1.6049217E+01
 -1.6026287E+01 -1.6003395E+01 -1.5980541E+01 -1.5957725E+01
 -1.5934948E+01 -1.5912208E+01 -1.5889506E+01 -1.5866842E+01
 -1.5844215E+01 -1.5821627E+01 -1.5799075E+01 -1.5776561E+01
 -1.5754085E+01 -1.5731646E+01 -1.5709244E+01 -1.5686879E+01
 -1.5664552E+01 -1.5642262E+01 -1.5620009E+01 -1.5597792E+01
 -1.5575612E+01 -1.5553469E+01 -1.5531364E+01 -1.5509294E+01
 -1.5487262E+01 -1.5465265E+01 -1.5443305E+01 -1.5421382E+01
 -1.5399494E+01 -1.5377643E+01 -1.5355829E+01 -1.5334049E+01
 -1.5312307E+01 -1.5290600E+01 -1.5268929E+01 -1.5247295E+01
 -1.5225695E+01 -1.5204131E+01 -1.5182603E+01 -1.5161111E+01
 -1.5139654E+01 -1.5118232E+01 -1.5096847E+01 -1.5075496E+01
 -1.5054180E+01 -1.5032900E+01 -1.5011654E+01 -1.4990444E+01
 -1.4969268E+01 -1.4948128E+01 -1.4927022E+01 -1.4905951E+01
 -1.4884915E+01 -1.4863913E+01 -1.4842946E+01 -1.4822013E+01
 -1.4801115E+01 -1.4780252E+01 -1.4759422E+01 -1.4738627E+01
 -1.4717866E+01 -1.4697139E+01 -1.4676446E+01 -1.4655787E+01
 -1.4635162E+01 -1.4614571E+01 -1.4594013E+01 -1.4573490E+01
 -1.4553000E+01 -1.4532544E+01 -1.4512121E+01 -1.4491731E+01
 -1.4471375E+01 -1.4451053E+01 -1.4430764E+01 -1.4410508E+01
 -1.4390285E+01 -1.4370095E+01 -1.4349938E+01 -1.4329814E+01
 -1.4309723E+01 -1.4289665E+01 -1.4269640E+01 -1.4249648E+01
 -1.4229688E+01 -1.4209760E+01 -1.4189866E+01 -1.4170004E+01
 -1.4150174E+01 -1.4130377E+01 -1.4110612E+01 -1.4090879E+01
 -1.4071178E+01 -1.4051510E+01 -1.4031873E+01 -1.4012269E+01
 -1.3992696E+01 -1.3973156E+01 -1.3953647E+01 -1.3934170E+01
 -1.3914725E+01 -1.3895311E+01 -1.3875929E+01 -1.3856579E+01
 -1.3837259E+01 -1.3817972E+01 -1.3798715E+01 -1.3779491E+01
 -1.3760297E+01 -1.3741134E+01 -1.3722003E+01 -1.3702903E+01
 -1.3683833E+01 -1.3664795E+01 -1.3645787E+01 -1.3626811E+01
 -1.3607865E+01 -1.3588950E+01 -1.3570065E+01 -1.3551212E+01
 -1.3532388E+01 -1.3513595E+01 -1.3494833E+01 -1.3476101E+01
 -1.3457399E+01 -1.3438728E+01 -1.3420087E+01 -1.3401476E+01
 -1.3382895E+01 -1.3364344E+01 -1.3345823E+01 -1.3327332E+01
 -1.3308872E+01 -1.3290440E+01 -1.3272038E+01 -1.3253667E+01
 -1.3235325E+01 -1.3217012E+01 -1.3198730E+01 -1.3180476E+01
 -1.3162252E+01 -1.3144058E+01 -1.3125893E+01 -1.3107756E+01
 -1.3089650E+01 -1.3071572E+01 -1.3053524E+01 -1.3035504E+01
 -1.3017514E+01 -1.2999553E+01 -1.2981620E+01 -1.2963716E+01
 -1.2945842E+01 -1.2927995E+01 -1.2910178E+01 -1.2892390E+01
 -1.2874629E+01 -1.2856898E+01 -1.2839195E+01 -1.2821520E+01
 -1.2803873E+01 -1.2786256E+01 -1.2768666E+01 -1.2751104E+01
 -1.2733571E+01 -1.2716066E+01 -1.2698589E+01 -1.2681140E+01
 -1.2663719E+01 -1.2646325E+01 -1.2628960E+01 -1.2611622E+01
 -1.2594313E+01 -1.2577031E+01 -1.2559776E+01 -1.2542549E+01
 -1.2525350E+01 -1.2508178E+01 -1.2491034E+01 -1.2473918E+01
 -1.2456828E+01 -1.2439766E+01 -1.2422731E+01 -1.2405723E+01
 -1.2388742E+01 -1.2371789E+01 -1.2354863E+01 -1.2337963E+01
 -1.2321091E+01 -1.2304245E+01 -1.2287426E+01 -1.2270635E+01
 -1.2253870E+01 -1.2237131E+01 -1.2220420E+01 -1.2203735E+01
 -1.2187076E+01 -1.2170444E+01 -1.2153839E+01 -1.2137259E+01
 -1.2120707E+01 -1.2104180E+01 -1.2087680E+01 -1.2071207E+01
 -1.2054759E+01 -1.2038337E+01 -1.2021942E+01 -1.2005573E+01
 -1.1989229E+01 -1.1972912E+01 -1.1956620E+01 -1.1940355E+01
 -1.1924115E+01 -1.1907901E+01 -1.1891712E+01 -1.1875550E+01
 -1.1859413E+01 -1.1843301E+01 -1.1827215E+01 -1.1811155E+01
 -1.1795120E+01 -1.1779110E+01 -1.1763125E+01 -1.1747166E+01
 -1.1731232E+01 -1.1715324E+01 -1.1699441E+01 -1.1683583E+01
 -1.1667749E+01 -1.1651941E+01 -1.1636158E+01 -1.1620400E+01
 -1.1604666E+01 -1.1588958E+01 -1.1573274E+01 -1.1557615E+01
 -1.1541981E+01 -1.1526371E+01 -1.1510786E+01 -1.1495226E+01
 -1.1479690E+01 -1.1464179E+01 -1.1448692E+01 -1.1433230E+01
 -1.1417792E+01 -1.1402378E+01 -1.1386988E+01 -1.1371622E+01
 -1.1356281E+01 -1.1340965E+01 -1.1325671E+01 -1.1310403E+01
 -1.1295158E+01 -1.1279937E+01 -1.1264740E+01 -1.1249567E+01
 -1.1234418E+01 -1.1219292E+01 -1.1204191E+01 -1.1189113E+01
 -1.1174058E+01 -1.1159027E+01 -1.1144021E+01 -1.1129037E+01
 -1.1114077E+01 -1.1099141E+01 -1.1084227E+01 -1.1069337E+01
 -1.1054471E+01 -1.1039627E+01 -1.1024808E+01 -1.1010011E+01
 -1.0995237E+01 -1.0980487E+01 -1.0965760E+01 -1.0951055E+01
 -1.0936374E+01 -1.0921715E+01 -1.0907080E+01 -1.0892468E+01
 -1.0877878E+01 -1.0863311E+01 -1.0848767E+01 -1.0834245E+01
 -1.0819746E+01 -1.0805270E+01 -1.0790816E+01 -1.0776386E+01
 -1.0761977E+01 -1.0747591E+01 -1.0733227E+01 -1.0718886E+01
 -1.0704567E+01 -1.0690271E+01 -1.0675996E+01 -1.0661744E+01
 -1.0647514E+01 -1.0633307E+01 -1.0619121E+01 -1.0604957E+01
 -1.0590816E+01 -1.0576697E+01 -1.0562599E+01 -1.0548523E+01
 -1.0534469E+01 -1.0520438E+01 -1.0506428E+01 -1.0492439E+01
 -1.0478472E+01 -1.0464527E+01 -1.0450604E+01 -1.0436702E+01
 -1.0422822E+01 -1.0408964E+01 -1.0395126E+01 -1.0381311E+01
 -1.0367516E+01 -1.0353744E+01 -1.0339992E+01 -1.0326262E+01
 -1.0312553E+01 -1.0298865E+01 -1.0285199E+01 -1.0271553E+01
 -1.0257929E+01 -1.0244326E+01 -1.0230744E+01 -1.0217183E+01
 -1.0203643E+01 -1.0190123E+01 -1.0176625E+01 -1.0163147E+01
 -1.0149691E+01 -1.0136255E+01 -1.0122840E+01 -1.0109445E+01
 -1.0096072E+01 -1.0082719E+01 -1.0069386E+01 -1.0056074E+01
 -1.0042783E+01 -1.0029512E+01 -1.0016261E+01 -1.0003031E+01
 -9.9898215E+00 -9.9766320E+00 -9.9634628E+00 -9.9503145E+00
 -9.9371858E+00 -9.9240773E+00 -9.9109890E+00 -9.8979210E+00
 -9.8848733E+00 -9.8718458E+00 -9.8588378E+00 -9.8458500E+00
 -9.8328825E+00 -9.8199345E+00 -9.8070060E+00 -9.7940978E+00
 -9.7812098E+00 -9.7683413E+00 -9.7554923E+00 -9.7426628E+00
 -9.7298535E+00 -9.7170638E+00 -9.7042935E+00 -9.6915428E+00
 -9.6788115E+00 -9.6661005E+00 -9.6534083E+00 -9.6407355E+00
 -9.6280823E+00 -9.6154485E+00 -9.6028335E+00 -9.5902388E+00
 -9.5776628E+00 -9.5651055E+00 -9.5525685E+00 -9.5400495E+00
 -9.5275508E+00 -9.5150708E+00 -9.5026095E+00 -9.4901670E+00
 -9.4777440E+00 -9.4653405E+00 -9.4529550E+00 -9.4405890E+00
 -9.4282418E+00 -9.4159133E+00 -9.4036035E+00 -9.3913125E+00
 -9.3790403E+00 -9.3667868E+00 -9.3545520E+00 -9.3423353E+00
 -9.3301380E+00 -9.3179588E+00 -9.3057983E+00 -9.2936565E+00
 -9.2815328E+00 -9.2694278E+00 -9.2573415E+00 -9.2452733E+00
 -9.2332230E+00 -9.2211915E+00 -9.2091788E+00 -9.1971833E+00
 -9.1852065E+00 -9.1732478E+00 -9.1613078E+00 -9.1493850E+00
 -9.1374810E+00 -9.1255950E+00 -9.1137270E+00 -9.1018763E+00
 -9.0900443E+00 -9.0782303E+00 -9.0664343E+00 -9.0546555E+00
 -9.0428948E+00 -9.0311520E+00 -9.0194273E+00 -9.0077198E+00
 -8.9960303E+00 -8.9843588E+00 -8.9727045E+00 -8.9610683E+00
 -8.9494493E+00 -8.9378483E+00 -8.9262645E+00 -8.9146980E+00
 -8.9031495E+00 -8.8916175E+00 -8.8801043E+00 -8.8686075E+00
 -8.8571280E+00 -8.8456665E+00 -8.8342223E+00 -8.8227945E+00
 -8.8113848E+00 -8.7999915E+00 -8.7886163E+00 -8.7772575E+00
 -8.7659168E+00 -8.7545925E+00 -8.7432848E+00 -8.7319950E+00
 -8.7207218E+00 -8.7094658E+00 -8.6982263E+00 -8.6870040E+00
 -8.6757983E+00 -8.6646098E+00 -8.6534385E+00 -8.6422830E+00
 -8.6311455E+00 -8.6200238E+00 -8.6089193E+00 -8.5978313E+00
 -8.5867598E+00 -8.5757048E+00 -8.5646670E+00 -8.5536450E+00
 -8.5426403E+00 -8.5316520E+00 -8.5206795E+00 -8.5097243E+00
 -8.4987848E+00 -8.4878625E+00 -8.4769560E+00 -8.4660660E+00
 -8.4551925E+00 -8.4443348E+00 -8.4334935E+00 -8.4226688E+00
 -8.4118605E+00 -8.4010680E+00 -8.3902913E+00 -8.3795310E+00
 -8.3687873E+00 -8.3580593E+00 -8.3473470E+00 -8.3366513E+00
 -8.3259713E+00 -8.3153070E+00 -8.3046585E+00 -8.2940265E+00
 -8.2834103E+00 -8.2728098E+00 -8.2622250E+00 -8.2516560E+00
 -8.2411028E+00 -8.2305653E+00 -8.2200443E+00 -8.2095383E+00
 -8.1990480E+00 -8.1885728E+00 -8.1781140E+00 -8.1676703E+00
 -8.1572423E+00 -8.1468300E+00 -8.1364335E+00 -8.1260520E+00
 -8.1156855E+00 -8.1053355E+00 -8.0950005E+00 -8.0846805E+00
 -8.0743763E+00 -8.0640870E+00 -8.0538128E+00 -8.0435543E+00
 -8.0333115E+00 -8.0230830E+00 -8.0128703E+00 -8.0026725E+00
 -7.9924898E+00 -7.9823228E+00 -7.9721700E+00 -7.9620330E+00
 -7.9519103E+00 -7.9418033E+00 -7.9317105E+00 -7.9216335E+00
 -7.9115708E+00 -7.9015238E+00 -7.8914910E+00 -7.8814733E+00
 -7.8714705E+00 -7.8614820E+00 -7.8515085E+00 -7.8415500E+00
 -7.8316065E+00 -7.8216773E+00 -7.8117630E+00 -7.8018630E+00
 -7.7919780E+00 -7.7821073E+00 -7.7722515E+00 -7.7624100E+00
 -7.7525828E+00 -7.7427705E+00 -7.7329725E+00 -7.7231895E+00
 -7.7134208E+00 -7.7036655E+00 -7.6939260E+00 -7.6842000E+00
 -7.6744883E+00 -7.6647915E+00 -7.6551083E+00 -7.6454400E+00
 -7.6357853E+00 -7.6261455E+00 -7.6165193E+00 -7.6069080E+00
 -7.5973103E+00 -7.5877268E+00 -7.5781575E+00 -7.5686018E+00
 -7.5590603E+00 -7.5495330E+00 -7.5400200E+00 -7.5305213E+00
 -7.5210360E+00 -7.5115643E+00 -7.5021068E+00 -7.4926634E+00
 -7.4832337E+00 -7.4738178E+00 -7.4644158E+00 -7.4550276E+00
 -7.4456531E+00 -7.4362925E+00 -7.4269455E+00 -7.4176122E+00
 -7.4082926E+00 -7.3989867E+00 -7.3896944E+00 -7.3804157E+00
 -7.3711507E+00 -7.3618991E+00 -7.3526612E+00 -7.3434367E+00
 -7.3342258E+00 -7.3250283E+00 -7.3158443E+00 -7.3066736E+00
 -7.2975164E+00 -7.2883727E+00 -7.2792422E+00 -7.2701252E+00
 -7.2610214E+00 -7.2519308E+00 -7.2428537E+00 -7.2337897E+00
 -7.2247390E+00 -7.2157015E+00 -7.2066772E+00 -7.1976660E+00
 -7.1886680E+00 -7.1796831E+00 -7.1707113E+00 -7.1617526E+00
 -7.1528069E+00 -7.1438743E+00 -7.1349546E+00 -7.1260480E+00
 -7.1171543E+00 -7.1082737E+00 -7.0994058E+00 -7.0905509E+00
 -7.0817090E+00 -7.0728798E+00 -7.0640635E+00 -7.0552600E+00
 -7.0464693E+00 -7.0376914E+00 -7.0289263E+00 -7.0201739E+00
 -7.0114341E+00 -7.0027071E+00 -6.9939928E+00 -6.9852911E+00
 -6.9766020E+00 -6.9679255E+00 -6.9592616E+00 -6.9506103E+00
 -6.9419716E+00 -6.9333453E+00 -6.9247316E+00 -6.9161303E+00
 -6.9075415E+00 -6.8989652E+00 -6.8904012E+00 -6.8818497E+00
 -6.8733105E+00 -6.8647838E+00 -6.8562692E+00 -6.8477672E+00
 -6.8392773E+00 -6.8307997E+00 -6.8223344E+00 -6.8138813E+00
 -6.8054405E+00 -6.7970118E+00 -6.7885953E+00 -6.7801910E+00
 -6.7717988E+00 -6.7634188E+00 -6.7550508E+00 -6.7466949E+00
 -6.7383510E+00 -6.7300192E+00 -6.7216994E+00 -6.7133916E+00
 -6.7050958E+00 -6.6968120E+00 -6.6885401E+00 -6.6802800E+00
 -6.6720319E+00 -6.6637957E+00 -6.6555713E+00 -6.6473588E+00
 -6.6391581E+00 -6.6309692E+00 -6.6227921E+00 -6.6146267E+00
 -6.6064730E+00 -6.5983312E+00 -6.5902010E+00 -6.5820824E+00
 -6.5739756E+00 -6.5658804E+00 -6.5577968E+00 -6.5497249E+00
 -6.5416645E+00 -6.5336157E+00 -6.5255785E+00 -6.5175527E+00
 -6.5095385E+00 -6.5015358E+00 -6.4935446E+00 -6.4855648E+00
 -6.4775965E+00 -6.4696396E+00 -6.4616940E+00 -6.4537599E+00
 -6.4458371E+00 -6.4379257E+00 -6.4300256E+00 -6.4221368E+00
 -6.4142593E+00 -6.4063931E+00 -6.3985381E+00 -6.3906944E+00
 -6.3828618E+00 -6.3750404E+00 -6.3672303E+00 -6.3594313E+00
 -6.3516434E+00 -6.3438668E+00 -6.3361011E+00 -6.3283466E+00
 -6.3206031E+00 -6.3128707E+00 -6.3051494E+00 -6.2974390E+00
 -6.2897396E+00 -6.2820512E+00 -6.2743738E+00 -6.2667073E+00
 -6.2590517E+00 -6.2514071E+00 -6.2437734E+00 -6.2361505E+00
 -6.2285385E+00 -6.2209373E+00 -6.2133470E+00 -6.2057674E+00
 -6.1981986E+00 -6.1906406E+00 -6.1830933E+00 -6.1755568E+00
 -6.1680310E+00 -6.1605158E+00 -6.1530114E+00 -6.1455176E+00
 -6.1380345E+00 -6.1305620E+00 -6.1231001E+00 -6.1156489E+00
 -6.1082081E+00 -6.1007780E+00 -6.0933584E+00 -6.0859493E+00
 -6.0785507E+00 -6.0711626E+00 -6.0637850E+00 -6.0564179E+00
 -6.0490611E+00 -6.0417149E+00 -6.0343790E+00 -6.0270534E+00
 -6.0197383E+00 -6.0124336E+00 -6.0051392E+00 -5.9978550E+00
 -5.9905812E+00 -5.9833177E+00 -5.9760644E+00 -5.9688215E+00
 -5.9615888E+00 -5.9543663E+00 -5.9471539E+00 -5.9399518E+00
 -5.9327598E+00 -5.9255780E+00 -5.9184064E+00 -5.9112449E+00
 -5.9040935E+00 -5.8969521E+00 -5.8898209E+00 -5.8826997E+00
 -5.8755885E+00 -5.8684874E+00 -5.8613963E+00 -5.8543151E+00
 -5.8472441E+00 -5.8401829E+00 -5.8331316E+00 -5.8260903E+00
 -5.8190589E+00 -5.8120374E+00 -5.8050258E+00 -5.7980241E+00
 -5.7910322E+00 -5.7840502E+00 -5.7770780E+00 -5.7701155E+00
 -5.7631628E+00 -5.7562200E+00 -5.7492869E+00 -5.7423635E+00
 -5.7354498E+00 -5.7285459E+00 -5.7216517E+00 -5.7147671E+00
 -5.7078922E+00 -5.7010269E+00 -5.6941713E+00 -5.6873253E+00
 -5.6804888E+00 -5.6736620E+00 -5.6668448E+00 -5.6600371E+00
 -5.6532389E+00 -5.6464503E+00 -5.6396711E+00 -5.6329015E+00
 -5.6261414E+00 -5.6193907E+00 -5.6126494E+00 -5.6059176E+00
O_2-    O_2-     
  4.3090892E+10  4.2653194E+10  4.2219941E+10  4.1791089E+10
  4.1366593E+10  4.0946409E+10  4.0530493E+10  4.0118802E+10
  3.9711292E+10  3.9307922E+10  3.8908649E+10  3.8513432E+10
  3.8122229E+10  3.7735000E+10  3.7351704E+10  3.6972301E+10
  3.6596752E+10  3.6225018E+10  3.5857060E+10  3.5492840E+10
  3.5132319E+10  3.4775460E+10  3.4422225E+10  3.4072579E+10
  3.3726485E+10  3.3383906E+10  3.3044806E+10  3.2709151E+10
  3.2376906E+10  3.2048035E+10  3.1722505E+10  3.1400281E+10
  3.1081331E+10  3.0765620E+10  3.0453116E+10  3.0143786E+10
  2.9837599E+10  2.9534521E+10  2.9234522E+10  2.8937571E+10
  2.8643635E+10  2.8352686E+10  2.8064691E+10  2.7779622E+10
  2.7497449E+10  2.7218141E+10  2.6941671E+10  2.6668009E+10
  2.6397127E+10  2.6128997E+10  2.5863589E+10  2.5600878E+10
  2.5340836E+10  2.5083434E+10  2.4828647E+10  2.4576449E+10
  2.4326812E+10  2.4079710E+10  2.3835119E+10  2.3593012E+10
  2.3353365E+10  2.3116151E+10  2.2881347E+10  2.2648928E+10
  2.2418870E+10  2.2191149E+10  2.1965741E+10  2.1742622E+10
  2.1521770E+10  2.1303161E+10  2.1086773E+10  2.0872583E+10
  2.0660568E+10  2.0450707E+10  2.0242977E+10  2.0037358E+10
  1.9833827E+10  1.9632363E+10  1.9432946E+10  1.9235555E+10
  1.9040168E+10  1.8846766E+10  1.8655329E+10  1.8465836E+10
  1.8278268E+10  1.8092606E+10  1.7908829E+10  1.7726918E+10
  1.7546856E+10  1.7368623E+10  1.7192200E+10  1.7017569E+10
  1.6844712E+10  1.6673610E+10  1.6504247E+10  1.6336604E+10
  1.6170664E+10  1.6006409E+10  1.5843823E+10  1.5682888E+10
  1.5523588E+10  1.5365906E+10  1.5209826E+10  1.5055331E+10
  1.4902405E+10  1.4751033E+10  1.4601198E+10  1.4452886E+10
  1.4306080E+10  1.4160765E+10  1.4016926E+10  1.3874548E+10
  1.3733616E+10  1.3594116E+10  1.3456033E+10  1.3319352E+10
  1.3184060E+10  1.3050142E+10  1.2917584E+10  1.2786373E+10
  1.2656494E+10  1.2527935E+10  1.2400682E+10  1.2274721E+10
  1.2150040E+10  1.2026625E+10  1.1904464E+10  1.1783543E+10
  1.1663851E+10  1.1545375E+10  1.1428102E+10  1.1312020E+10
  1.1197117E+10  1.1083382E+10  1.0970802E+10  1.0859365E+10
  1.0749060E+10  1.0639876E+10  1.0531800E+10  1.0424823E+10
  1.0318932E+10  1.0214117E+10  1.0110366E+10  1.0007669E+10
  9.9060159E+09  9.8053948E+09  9.7057958E+09  9.6072086E+09
  9.5096227E+09  9.4130280E+09  9.3174145E+09  9.2227722E+09
  9.1290913E+09  9.0363619E+09  8.9445744E+09  8.8537193E+09
  8.7637870E+09  8.6747682E+09  8.5866537E+09  8.4994341E+09
  8.4131005E+09  8.3276439E+09  8.2430553E+09  8.1593259E+09
  8.0764469E+09  7.9944099E+09  7.9132061E+09  7.8328271E+09
  7.7532646E+09  7.6745103E+09  7.5965559E+09  7.5193934E+09
  7.4430146E+09  7.3674117E+09  7.2925767E+09  7.2185018E+09
  7.1451794E+09  7.0726017E+09  7.0007613E+09  6.9296506E+09
  6.8592622E+09  6.7895887E+09  6.7206230E+09  6.6523578E+09
  6.5847860E+09  6.5179006E+09  6.4516946E+09  6.3861610E+09
  6.3212932E+09  6.2570842E+09  6.1935274E+09  6.1306162E+09
  6.0683441E+09  6.0067044E+09  5.9456909E+09  5.8852972E+09
  5.8255168E+09  5.7663437E+09  5.7077717E+09  5.6497946E+09
  5.5924064E+09  5.5356012E+09  5.4793729E+09  5.4237158E+09
  5.3686240E+09  5.3140919E+09  5.2601136E+09  5.2066836E+09
  5.1537964E+09  5.1014463E+09  5.0496280E+09  4.9983361E+09
  4.9475651E+09  4.8973099E+09  4.8475651E+09  4.7983257E+09
  4.7495863E+09  4.7013421E+09  4.6535879E+09  4.6063187E+09
  4.5595297E+09  4.5132160E+09  4.4673727E+09  4.4219950E+09
  4.3770783E+09  4.3326178E+09  4.2886089E+09  4.2450471E+09
  4.2019277E+09  4.1592464E+09  4.1169985E+09  4.0751798E+09
  4.0337859E+09  3.9928124E+09  3.9522552E+09  3.9121099E+09
  3.8723723E+09  3.8330384E+09  3.7941041E+09  3.7555652E+09
  3.7174178E+09  3.6796579E+09  3.6422815E+09  3.6052848E+09
  3.5686638E+09  3.5324149E+09  3.4965341E+09  3.4610178E+09
  3.4258623E+09  3.3910639E+09  3.3566189E+09  3.3225238E+09
  3.2887750E+09  3.2553691E+09  3.2223024E+09  3.1895717E+09
  3.1571734E+09  3.1251042E+09  3.0933607E+09  3.0619397E+09
  3.0308378E+09  3.0000519E+09  2.9695786E+09  2.9394149E+09
  2.9095576E+09  2.8800036E+09  2.8507498E+09  2.8217931E+09
  2.7931305E+09  2.7647591E+09  2.7366759E+09  2.7088779E+09
  2.6813623E+09  2.6541261E+09  2.6271667E+09  2.6004810E+09
  2.5740665E+09  2.5479202E+09  2.5220395E+09  2.4964217E+09
  2.4710642E+09  2.4459642E+09  2.4211191E+09  2.3965264E+09
  2.3721835E+09  2.3480879E+09  2.3242370E+09  2.3006284E+09
  2.2772597E+09  2.2541282E+09  2.2312318E+09  2.2085679E+09
  2.1861342E+09  2.1639284E+09  2.1419481E+09  2.1201911E+09
  2.0986551E+09  2.0773379E+09  2.0562372E+09  2.0353508E+09
  2.0146766E+09  1.9942124E+09  1.9739560E+09  1.9539055E+09
  1.9340585E+09  1.9144132E+09  1.8949674E+09  1.8757191E+09
  1.8566664E+09  1.8378072E+09  1.8191395E+09  1.8006615E+09
  1.7823711E+09  1.7642666E+09  1.7463459E+09  1.7286073E+09
  1.7110488E+09  1.6936687E+09  1.6764652E+09  1.6594364E+09
  1.6425805E+09  1.6258959E+09  1.6093807E+09  1.5930334E+09
  1.5768520E+09  1.5608350E+09  1.5449807E+09  1.5292875E+09
  1.5137536E+09  1.4983776E+09  1.4831577E+09  1.4680924E+09
  1.4531802E+09  1.4384194E+09  1.4238085E+09  1.4093461E+09
  1.3950306E+09  1.3808605E+09  1.3668343E+09  1.3529506E+09
  1.3392079E+09  1.3256048E+09  1.3121399E+09  1.2988117E+09
  1.2856189E+09  1.2725602E+09  1.2596340E+09  1.2468392E+09
  1.2341744E+09  1.2216382E+09  1.2092293E+09  1.1969465E+09
  1.1847884E+09  1.1727538E+09  1.1608415E+09  1.1490502E+09
  1.1373786E+09  1.1258256E+09  1.1143899E+09  1.1030705E+09
  1.0918659E+09  1.0807752E+09  1.0697972E+09  1.0589306E+09
  1.0481745E+09  1.0375276E+09  1.0269888E+09  1.0165571E+09
  1.0062314E+09  9.9601049E+08  9.8589345E+08  9.7587916E+08
  9.6596660E+08  9.5615473E+08  9.4644252E+08  9.3682897E+08
  9.2731306E+08  9.1789381E+08  9.0857024E+08  8.9934138E+08
  8.9020625E+08  8.8116392E+08  8.7221344E+08  8.6335387E+08
  8.5458429E+08  8.4590379E+08  8.3731147E+08  8.2880642E+08
  8.2038776E+08  8.1205461E+08  8.0380611E+08  7.9564139E+08
  7.8755961E+08  7.7955992E+08  7.7164148E+08  7.6380348E+08
  7.5604510E+08  7.4836551E+08  7.4076394E+08  7.3323958E+08
  7.2579165E+08  7.1841937E+08  7.1112197E+08  7.0389870E+08
  6.9674880E+08  6.8967153E+08  6.8266614E+08  6.7573191E+08
  6.6886812E+08  6.6207404E+08  6.5534898E+08  6.4869223E+08
  6.4210309E+08  6.3558088E+08  6.2912492E+08  6.2273454E+08
  6.1640908E+08  6.1014786E+08  6.0395024E+08  5.9781557E+08
  5.9174322E+08  5.8573254E+08  5.7978293E+08  5.7389374E+08
  5.6806437E+08  5.6229422E+08  5.5658268E+08  5.5092915E+08
  5.4533305E+08  5.3979379E+08  5.3431080E+08  5.2888350E+08
  5.2351133E+08  5.1819372E+08  5.1293014E+08  5.0772001E+08
  5.0256281E+08  4.9745799E+08  4.9240503E+08  4.8740339E+08
  4.8245256E+08  4.7755201E+08  4.7270124E+08  4.6789975E+08
  4.6314702E+08  4.5844258E+08  4.5378591E+08  4.4917655E+08
  4.4461401E+08  4.4009781E+08  4.3562749E+08  4.3120257E+08
  4.2682260E+08  4.2248712E+08  4.1819568E+08  4.1394783E+08
  4.0974312E+08  4.0558113E+08  4.0146141E+08  3.9738354E+08
  3.9334709E+08  3.8935163E+08  3.8539677E+08  3.8148207E+08
  3.7760714E+08  3.7377157E+08  3.6997496E+08  3.6621691E+08
  3.6249704E+08  3.5881495E+08  3.5517026E+08  3.5156260E+08
  3.4799158E+08  3.4445683E+08  3.4095798E+08  3.3749468E+08
  3.3406655E+08  3.3067325E+08  3.2731441E+08  3.2398969E+08
  3.2069874E+08  3.1744123E+08  3.1421679E+08  3.1102511E+08
  3.0786586E+08  3.0473869E+08  3.0164328E+08  2.9857932E+08
  2.9554648E+08  2.9254445E+08  2.8957290E+08  2.8663155E+08
  2.8372007E+08  2.8083816E+08  2.7798553E+08  2.7516187E+08
  2.7236689E+08  2.6960031E+08  2.6686183E+08  2.6415116E+08
  2.6146802E+08  2.5881214E+08  2.5618324E+08  2.5358104E+08
  2.5100528E+08  2.4845567E+08  2.4593197E+08  2.4343389E+08
  2.4096120E+08  2.3851362E+08  2.3609090E+08  2.3369279E+08
  2.3131904E+08  2.2896940E+08  2.2664363E+08  2.2434148E+08
  2.2206271E+08  2.1980710E+08  2.1757439E+08  2.1536436E+08
  2.1317678E+08  2.1101143E+08  2.0886806E+08  2.0674647E+08
  2.0464643E+08  2.0256772E+08  2.0051012E+08  1.9847343E+08
  1.9645742E+08  1.9446189E+08  1.9248663E+08  1.9053143E+08
  1.8859610E+08  1.8668042E+08  1.8478420E+08  1.8290724E+08
  1.8104935E+08  1.7921033E+08  1.7738999E+08  1.7558813E+08
  1.7380459E+08  1.7203915E+08  1.7029165E+08  1.6856190E+08
  1.6684973E+08  1.6515494E+08  1.6347737E+08  1.6181683E+08
  1.6017317E+08  1.5854620E+08  1.5693575E+08  1.5534167E+08
  1.5376377E+08  1.5220191E+08  1.5065590E+08  1.4912561E+08
  1.4761085E+08  1.4611149E+08  1.4462735E+08  1.4315829E+08
  1.4170415E+08  1.4026478E+08  1.3884003E+08  1.3742975E+08
  1.3603380E+08  1.3465202E+08  1.3328429E+08  1.3193044E+08
  1.3059035E+08  1.2926387E+08  1.2795086E+08  1.2665119E+08
  1.2536472E+08  1.2409132E+08  1.2283086E+08  1.2158319E+08
  1.2034820E+08  1.1912576E+08  1.1791573E+08  1.1671799E+08
  1.1553242E+08  1.1435889E+08  1.1319729E+08  1.1204748E+08
  1.1090935E+08  1.0978278E+08  1.0866765E+08  1.0756385E+08
  1.0647126E+08  1.0538977E+08  1.0431927E+08  1.0325964E+08
  1.0221077E+08  1.0117256E+08  1.0014489E+08  9.9127664E+07
  9.8120768E+07  9.7124099E+07  9.6137555E+07  9.5161031E+07
  9.4194426E+07  9.3237639E+07  9.2290572E+07  9.1353124E+07
  9.0425198E+07  8.9506698E+07  8.8597527E+07  8.7697592E+07
  8.6806797E+07  8.5925051E+07  8.5052261E+07  8.4188337E+07
  8.3333188E+07  8.2486726E+07  8.1648861E+07  8.0819507E+07
  7.9998577E+07  7.9185986E+07  7.8381649E+07  7.7585482E+07
  7.6797402E+07  7.6017327E+07  7.5245176E+07  7.4480867E+07
  7.3724323E+07  7.2975463E+07  7.2234209E+07  7.1500485E+07
  7.0774214E+07  7.0055320E+07  6.9343728E+07  6.8639365E+07
  6.7942156E+07  6.7252028E+07  6.6568911E+07  6.5892733E+07
  6.5223423E+07  6.4560911E+07  6.3905129E+07  6.3256009E+07
  6.2613481E+07  6.1977480E+07  6.1347940E+07  6.0724794E+07
  6.0107978E+07  5.9497427E+07  5.8893077E+07  5.8294867E+07
  5.7702733E+07  5.7116613E+07  5.6536447E+07  5.5962174E+07
  5.5393735E+07  5.4831069E+07  5.4274118E+07  5.3722825E+07
  5.3177132E+07  5.2636981E+07  5.2102318E+07  5.1573085E+07
  5.1049228E+07  5.0530691E+07  5.0017422E+07  4.9509367E+07
  4.9006472E+07  4.8508685E+07  4.8015955E+07  4.7528230E+07
  4.7045458E+07  4.6567591E+07  4.6094577E+07  4.5626368E+07
  4.5162915E+07  4.4704170E+07  4.4250084E+07  4.3800611E+07
  4.3355703E+07  4.2915315E+07  4.2479399E+07  4.2047912E+07
  4.1620807E+07  4.1198041E+07  4.0779569E+07  4.0365348E+07
  3.9955334E+07  3.9549485E+07  3.9147758E+07  3.8750112E+07
  3.8356505E+07  3.7966896E+07  3.7581245E+07  3.7199511E+07
  3.6821654E+07  3.6447635E+07  3.6077416E+07  3.5710957E+07
  3.5348221E+07  3.4989169E+07  3.4633764E+07  3.4281969E+07
  3.3933747E+07  3.3589063E+07  3.3247880E+07  3.2910162E+07
  3.2575875E+07  3.2244983E+07  3.1917452E+07  3.1593249E+07
  3.1272338E+07  3.0954687E+07  3.0640263E+07  3.0329032E+07
  3.0020963E+07  2.9716023E+07  2.9414180E+07  2.9115404E+07
  2.8819662E+07  2.8526924E+07  2.8237160E+07  2.7950339E+07
  2.7666432E+07  2.7385408E+07  2.7107239E+07  2.6831895E+07
  2.6559348E+07  2.6289570E+07  2.6022532E+07  2.5758206E+07
  2.5496565E+07  2.5237582E+07  2.4981229E+07  2.4727481E+07
  2.4476310E+07  2.4227690E+07  2.3981595E+07  2.3738001E+07
  2.3496880E+07  2.3258209E+07  2.3021962E+07  2.2788115E+07
  2.2556643E+07  2.2327523E+07  2.2100729E+07  2.1876239E+07
  2.1654030E+07  2.1434078E+07  2.1216360E+07  2.1000853E+07
  2.0787535E+07  2.0576384E+07  2.0367378E+07  2.0160495E+07
  1.9955714E+07  1.9753012E+07  1.9552370E+07  1.9353765E+07
  1.9157178E+07  1.8962587E+07  1.8769974E+07  1.8579316E+07
  1.8390596E+07  1.8203792E+07  1.8018886E+07  1.7835857E+07
  1.7654688E+07  1.7475360E+07  1.7297853E+07  1.7122148E+07
  1.6948229E+07  1.6776076E+07  1.6605672E+07  1.6436999E+07
  1.6270039E+07  1.6104775E+07  1.5941189E+07  1.5779266E+07
  1.5618987E+07  1.5460336E+07  1.5303296E+07  1.5147852E+07
  1.4993987E+07  1.4841684E+07  1.4690929E+07  1.4541705E+07
  1.4393996E+07  1.4247788E+07  1.4103065E+07  1.3959812E+07
  1.3818015E+07  1.3677657E+07  1.3538725E+07  1.3401205E+07
  1.3265081E+07  1.3130340E+07  1.2996968E+07  1.2864950E+07
  1.2734274E+07  1.2604924E+07  1.2476889E+07  1.2350154E+07
  1.2224707E+07  1.2100533E+07  1.1977621E+07  1.1855958E+07
  1.1735530E+07  1.1616325E+07  1.1498332E+07  1.1381537E+07
  1.1265928E+07  1.1151494E+07  1.1038221E+07  1.0926100E+07
  1.0815117E+07  1.0705262E+07  1.0596523E+07  1.0488888E+07
  1.0382346E+07  1.0276887E+07  1.0172498E+07  1.0069171E+07
  9.9668923E+06  9.8656529E+06  9.7654418E+06  9.6662487E+06
  9.5680631E+06  9.4708748E+06  9.3746738E+06  9.2794498E+06
  9.1851932E+06  9.0918939E+06  8.9995424E+06  8.9081289E+06
  8.8176440E+06  8.7280781E+06  8.6394221E+06  8.5516666E+06
  8.4648024E+06  8.3788206E+06  8.2937121E+06  8.2094682E+06
  8.1260799E+06  8.0435387E+06  7.9618359E+06  7.8809630E+06
  7.8009116E+06  7.7216733E+06  7.6432398E+06  7.5656031E+06
  7.4887549E+06  7.4126874E+06  7.3373925E+06  7.2628624E+06
  7.1890894E+06  7.1160657E+06  7.0437838E+06  6.9722361E+06
  6.9014151E+06  6.8313135E+06  6.7619239E+06  6.6932392E+06
  6.6252522E+06  6.5579557E+06  6.4913428E+06  6.4254066E+06
  6.3601400E+06  6.2955365E+06  6.2315891E+06  6.1682913E+06
  6.1056365E+06  6.0436180E+06  5.9822296E+06  5.9214647E+06
  5.8613170E+06  5.8017802E+06  5.7428482E+06  5.6845149E+06
  5.6267740E+06  5.5696197E+06  5.5130459E+06  5.4570467E+06
  5.4016164E+06  5.3467491E+06  5.2924391E+06  5.2386808E+06
  5.1854685E+06  5.1327968E+06  5.0806600E+06  5.0290529E+06
  4.9779699E+06  4.9274058E+06  4.8773554E+06  4.8278133E+06
  4.7787744E+06  4.7302337E+06  4.6821860E+06  4.6346264E+06
  4.5875498E+06  4.5409515E+06  4.4948265E+06  4.4491699E+06
  4.4039772E+06  4.3592435E+06  4.3149642E+06  4.2711346E+06
  4.2277503E+06  4.1848066E+06  4.1422991E+06  4.1002234E+06
  4.0585751E+06  4.0173499E+06  3.9765434E+06  3.9361513E+06
  3.8961696E+06  3.8565940E+06  3.8174204E+06  3.7786447E+06
  3.7402628E+06  3.7022708E+06  3.6646648E+06  3.6274407E+06
  3.5905947E+06  3.5541230E+06  3.5180217E+06  3.4822872E+06
  3.4469156E+06  3.4119033E+06  3.3772467E+06  3.3429420E+06
  3.3089859E+06  3.2753746E+06  3.2421048E+06  3.2091729E+06
  3.1765755E+06  3.1443092E+06  3.1123707E+06  3.0807565E+06
  3.0494635E+06  3.0184884E+06  2.9878279E+06  2.9574788E+06
  2.9274380E+06  2.8977024E+06  2.8682687E+06  2.8391341E+06
  2.8102954E+06  2.7817496E+06  2.7534938E+06  2.7255250E+06
  2.6978403E+06  2.6704368E+06  2.6433117E+06  2.6164620E+06
  2.5898851E+06  2.5635782E+06  2.5375385E+06  2.5117632E+06
  2.4862498E+06  2.4609956E+06  2.4359978E+06  2.4112540E+06
  2.3867615E+06  2.3625179E+06  2.3385204E+06  2.3147667E+06
  2.2912543E+06  2.2679807E+06  2.2449436E+06  2.2221404E+06
  2.1995689E+06  2.1772266E+06  2.1551113E+06  2.1332206E+06
  2.1115522E+06  2.0901040E+06  2.0688736E+06  2.0478589E+06
  2.0270576E+06  2.0064676E+06  1.9860868E+06  1.9659130E+06
  1.9459441E+06  1.9261780E+06  1.9066127E+06  1.8872462E+06
  1.8680763E+06  1.8491012E+06  1.8303189E+06  1.8117273E+06
  1.7933245E+06  1.7751087E+06  1.7570779E+06  1.7392303E+06
  1.7215639E+06  1.7040770E+06  1.6867677E+06  1.6696343E+06
  1.6526748E+06  1.6358877E+06  1.6192710E+06  1.6028232E+06
  1.5865424E+06  1.5704270E+06  1.5544753E+06  1.5386856E+06
  1.5230563E+06  1.5075857E+06  1.4922723E+06  1.4771144E+06
  1.4621105E+06  1.4472591E+06  1.4325584E+06  1.4180071E+06
  1.4036036E+06  1.3893464E+06  1.3752340E+06  1.3612650E+06
  1.3474378E+06  1.3337511E+06  1.3202035E+06  1.3067934E+06
  1.2935196E+06  1.2803806E+06  1.2673750E+06  1.2545016E+06
  1.2417589E+06  1.2291456E+06  1.2166605E+06  1.2043022E+06
  1.1920694E+06  1.1799609E+06  1.1679753E+06  1.1561115E+06
  1.1443682E+06  1.1327442E+06  1.1212383E+06  1.1098493E+06
  1.0985759E+06  1.0874170E+06  1.0763715E+06  1.0654382E+06
  1.0546159E+06  1.0439036E+06  1.0333001E+06  1.0228043E+06
  1.0124151E+06  1.0021314E+06  9.9195215E+05  9.8187633E+05
  9.7190285E+05  9.6203068E+05  9.5225879E+05  9.4258615E+05
  9.3301177E+05  9.2353464E+05  9.1415377E+05  9.0486819E+05
  8.9567693E+05  8.8657903E+05  8.7757354E+05  8.6865952E+05
  8.5983605E+05  8.5110221E+05  8.4245708E+05  8.3389976E+05
  8.2542937E+05  8.1704501E+05  8.0874582E+05  8.0053093E+05
  7.9239948E+05  7.8435063E+05  7.7638353E+05  7.6849736E+05
  7.6069129E+05  7.5296452E+05  7.4531623E+05  7.3774563E+05
  7.3025193E+05  7.2283434E+05  7.1549210E+05  7.0822444E+05
  7.0103060E+05  6.9390983E+05  6.8686140E+05  6.7988455E+05
  6.7297858E+05  6.6614275E+05  6.5937636E+05  6.5267870E+05
  6.4604907E+05  6.3948678E+05  6.3299115E+05  6.2656150E+05
  6.2019716E+05  6.1389746E+05  6.0766175E+05  6.0148939E+05
  5.9537972E+05  5.8933210E+05  5.8334592E+05  5.7742055E+05
  5.7155536E+05  5.6574974E+05  5.6000310E+05  5.5431483E+05
  5.4868434E+05  5.4311104E+05  5.3759435E+05  5.3213370E+05
  5.2672851E+05  5.2137823E+05  5.1608230E+05  5.1084015E+05
  5.0565126E+05  5.0051507E+05  4.9543106E+05  4.9039868E+05
  4.8541742E+05  4.8048676E+05  4.7560618E+05  4.7077518E+05
  4.6599325E+05  4.6125989E+05  4.5657461E+05  4.5193692E+05
  4.4734634E+05  4.4280239E+05  4.3830459E+05  4.3385248E+05
  4.2944560E+05  4.2508347E+05  4.2076566E+05  4.1649170E+05
  4.1226116E+05  4.0807359E+05  4.0392855E+05  3.9982562E+05
  3.9576436E+05  3.9174436E+05  3.8776519E+05  3.8382643E+05
  3.7992769E+05  3.7606855E+05  3.7224861E+05  3.6846746E+05
  3.6472473E+05  3.6102001E+05  3.5735293E+05  3.5372309E+05
  3.5013012E+05  3.4657365E+05  3.4305331E+05  3.3956872E+05
  3.3611953E+05  3.3270537E+05  3.2932589E+05  3.2598074E+05
  3.2266957E+05  3.1939203E+05  3.1614778E+05  3.1293649E+05
  3.0975781E+05  3.0661143E+05  3.0349700E+05  3.0041421E+05
  2.9736273E+05  2.9434225E+05  2.9135245E+05  2.8839301E+05
  2.8546364E+05  2.8256402E+05  2.7969386E+05  2.7685285E+05
  2.7404070E+05  2.7125711E+05  2.6850180E+05  2.6577447E+05
  2.6307485E+05  2.6040265E+05  2.5775759E+05  2.5513940E+05
  2.5254780E+05  2.4998253E+05  2.4744332E+05  2.4492989E+05
  2.4244200E+05  2.3997938E+05  2.3754177E+05  2.3512892E+05
  2.3274059E+05  2.3037651E+05  2.2803644E+05  2.2572015E+05
  2.2342738E+05  2.2115790E+05  2.1891147E+05  2.1668786E+05
  2.1448684E+05  2.1230818E+05  2.1015164E+05  2.0801701E+05
  2.0590406E+05  2.0381258E+05  2.0174234E+05  1.9969313E+05
  1.9766473E+05  1.9565694E+05  1.9366954E+05  1.9170233E+05
  1.8975510E+05  1.8782765E+05  1.8591977E+05  1.8403128E+05
  1.8216197E+05  1.8031165E+05  1.7848012E+05  1.7666719E+05
  1.7487268E+05  1.7309640E+05  1.7133816E+05  1.6959779E+05
  1.6787508E+05  1.6616988E+05  1.6448200E+05  1.6281126E+05
  1.6115749E+05  1.5952053E+05  1.5790019E+05  1.5629630E+05
  1.5470871E+05  1.5313725E+05  1.5158175E+05  1.5004204E+05
  1.4851798E+05  1.4700940E+05  1.4551614E+05  1.4403805E+05
  1.4257497E+05  1.4112676E+05  1.3969325E+05  1.3827431E+05
  1.3686978E+05  1.3547951E+05  1.3410337E+05  1.3274121E+05
  1.3139288E+05  1.3005825E+05  1.2873717E+05  1.2742951E+05
  1.2613514E+05  1.2485391E+05  1.2358570E+05  1.2233037E+05
  1.2108779E+05  1.1985783E+05  1.1864037E+05  1.1743527E+05
  1.1624242E+05  1.1506167E+05  1.1389293E+05  1.1273605E+05
  1.1159093E+05  1.1045744E+05  1.0933546E+05  1.0822487E+05
  1.0712557E+05  1.0603744E+05  1.0496035E+05  1.0389421E+05
  1.0283890E+05  1.0179431E+05  1.0076032E+05  9.9736843E+04
  9.8723759E+04  9.7720966E+04  9.6728358E+04  9.5745833E+04
  9.4773288E+04  9.3810622E+04  9.2857734E+04  9.1914525E+04
  9.0980897E+04  9.0056752E+04  8.9141994E+04  8.8236528E+04
  8.7340260E+04  8.6453095E+04  8.5574942E+04  8.4705708E+04
  8.3845304E+04  8.2993639E+04  8.2150626E+04  8.1316175E+04
  8.0490200E+04  7.9672615E+04  7.8863335E+04  7.8062275E+04
  7.7269352E+04  7.6484484E+04  7.5707587E+04  7.4938582E+04
  7.4177388E+04  7.3423926E+04  7.2678118E+04  7.1939885E+04
  7.1209150E+04  7.0485838E+04  6.9769873E+04  6.9061181E+04
  6.8359687E+04  6.7665319E+04  6.6978004E+04  6.6297670E+04
  6.5624247E+04  6.4957664E+04  6.4297852E+04  6.3644742E+04
  6.2998266E+04  6.2358357E+04  6.1724947E+04  6.1097972E+04
  6.0477365E+04  5.9863062E+04  5.9254999E+04  5.8653112E+04
  5.8057339E+04  5.7467618E+04  5.6883886E+04  5.6306084E+04
  5.5734151E+04  5.5168028E+04  5.4607655E+04  5.4052973E+04
  5.3503927E+04  5.2960457E+04  5.2422507E+04  5.1890022E+04
  5.1362945E+04  5.0841223E+04  5.0324799E+04  4.9813622E+04
  4.9307636E+04  4.8806791E+04  4.8311032E+04  4.7820310E+04
  4.7334572E+04  4.6853767E+04  4.6377847E+04  4.5906761E+04
  4.5440460E+04  4.4978895E+04  4.4522019E+04  4.4069783E+04
  4.3622141E+04  4.3179046E+04  4.2740452E+04  4.2306313E+04
  4.1876584E+04  4.1451219E+04  4.1030176E+04  4.0613409E+04
  4.0200875E+04  3.9792532E+04  3.9388337E+04  3.8988247E+04
  3.8592221E+04  3.8200218E+04  3.7812197E+04  3.7428116E+04
  3.7047938E+04  3.6671621E+04  3.6299126E+04  3.5930415E+04
  3.5565450E+04  3.5204191E+04  3.4846602E+04  3.4492645E+04
  3.4142284E+04  3.3795481E+04  3.3452201E+04  3.3112408E+04
  3.2776067E+04  3.2443141E+04  3.2113598E+04  3.1787402E+04
  3.1464519E+04  3.1144916E+04  3.0828559E+04  3.0515416E+04
  3.0205454E+04  2.9898640E+04  2.9594942E+04  2.9294329E+04
  2.8996770E+04  2.8702234E+04  2.8410689E+04  2.8122105E+04
  2.7836453E+04  2.7553702E+04  2.7273823E+04  2.6996788E+04
  2.6722566E+04  2.6451130E+04  2.6182450E+04  2.5916500E+04
  2.5653252E+04  2.5392677E+04  2.5134749E+04  2.4879441E+04
  2.4626726E+04  2.4376579E+04  2.4128972E+04  2.3883880E+04
  2.3641278E+04  2.3401140E+04  2.3163441E+04  2.2928157E+04
  2.2695263E+04  2.2464734E+04  2.2236547E+04  2.2010678E+04
  2.1787103E+04  2.1565799E+04  2.1346743E+04  2.1129912E+04
  2.0915283E+04  2.0702835E+04  2.0492544E+04  2.0284390E+04
  2.0078350E+04  1.9874402E+04  1.9672527E+04  1.9472702E+04
  1.9274906E+04  1.9079120E+04  1.8885323E+04  1.8693494E+04
  1.8503613E+04  1.8315661E+04  1.8129619E+04  1.7945466E+04
  1.7763184E+04  1.7582753E+04  1.7404155E+04  1.7227371E+04
  1.7052383E+04  1.6879172E+04  1.6707721E+04  1.6538011E+04
  1.6370025E+04  1.6203745E+04  1.6039154E+04  1.5876236E+04
  1.5714972E+04  1.5555346E+04  1.5397341E+04  1.5240942E+04
  1.5086131E+04  1.4932892E+04  1.4781210E+04  1.4631069E+04
  1.4482453E+04  1.4335346E+04  1.4189734E+04  1.4045601E+04
  1.3902932E+04  1.3761712E+04  1.3621926E+04  1.3483561E+04
  1.3346600E+04  1.3211031E+04  1.3076839E+04  1.2944010E+04
  1.2812531E+04  1.2682387E+04  1.2553564E+04  1.2426051E+04
  1.2299832E+04  1.2174896E+04  1.2051228E+04  1.1928817E+04
  1.1807649E+04  1.1687712E+04  1.1568994E+04  1.1451481E+04
  1.1335162E+04  1.1220024E+04  1.1106056E+04  1.0993245E+04
  1.0881581E+04  1.0771050E+04  1.0661642E+04  1.0553346E+04
  1.0446150E+04  1.0340042E+04  1.0235013E+04  1.0131050E+04
  1.0028143E+04  9.9262813E+03  9.8254544E+03  9.7256516E+03
  9.6268627E+03  9.5290771E+03  9.4322849E+03  9.3364758E+03
  9.2416399E+03  9.1477673E+03  9.0548482E+03  8.9628729E+03
  8.8718319E+03  8.7817157E+03  8.6925148E+03  8.6042200E+03
  8.5168220E+03  8.4303118E+03  8.3446803E+03  8.2599186E+03
  8.1760179E+03  8.0929695E+03  8.0107646E+03  7.9293947E+03
  7.8488513E+03  7.7691260E+03  7.6902106E+03  7.6120967E+03
  7.5347763E+03  7.4582413E+03  7.3824837E+03  7.3074956E+03
  7.2332692E+03  7.1597968E+03  7.0870706E+03  7.0150832E+03
  6.9438270E+03  6.8732946E+03  6.8034787E+03  6.7343718E+03
  6.6659670E+03  6.5982570E+03  6.5312347E+03  6.4648932E+03
  6.3992256E+03  6.3342251E+03  6.2698847E+03  6.2061979E+03
  6.1431580E+03  6.0807585E+03  6.0189928E+03  5.9578544E+03
  5.8973371E+03  5.8374345E+03  5.7781403E+03  5.7194485E+03
  5.6613528E+03  5.6038472E+03  5.5469257E+03  5.4905824E+03
  5.4348115E+03  5.3796070E+03  5.3249633E+03  5.2708746E+03
  5.2173353E+03  5.1643398E+03  5.1118827E+03  5.0599584E+03
  5.0085615E+03  4.9576867E+03  4.9073287E+03  4.8574821E+03
  4.8081419E+03  4.7593029E+03  4.7109599E+03  4.6631080E+03
  4.6157422E+03  4.5688574E+03  4.5224490E+03  4.4765119E+03
  4.4310414E+03  4.3860328E+03  4.3414813E+03  4.2973824E+03
  4.2537315E+03  4.2105239E+03  4.1677552E+03  4.1254210E+03
  4.0835167E+03  4.0420381E+03  4.0009808E+03  3.9603406E+03
  3.9201131E+03  3.8802943E+03  3.8408800E+03  3.8018659E+03
  3.7632482E+03  3.7250228E+03  3.6871856E+03  3.6497327E+03
  3.6126603E+03  3.5759645E+03  3.5396414E+03  3.5036872E+03
  3.4680983E+03  3.4328708E+03  3.3980012E+03  3.3634858E+03
  3.3293209E+03  3.2955031E+03  3.2620288E+03  3.2288945E+03
  3.1960968E+03  3.1636322E+03  3.1314974E+03  3.0996890E+03
  3.0682037E+03  3.0370382E+03  3.0061893E+03  2.9756537E+03
  2.9454283E+03  2.9155099E+03  2.8858954E+03  2.8565817E+03
  2.8275658E+03  2.7988446E+03  2.7704151E+03  2.7422745E+03
  2.7144196E+03  2.6868477E+03  2.6595559E+03  2.6325412E+03
  2.6058010E+03  2.5793324E+03  2.5531327E+03  2.5271990E+03
  2.5015288E+03  2.4761194E+03  2.4509680E+03  2.4260721E+03
  2.4014292E+03  2.3770365E+03  2.3528916E+03  2.3289919E+03
  2.3053350E+03  2.2819184E+03  2.2587396E+03  2.2357963E+03
  2.2130861E+03  2.1906065E+03  2.1683553E+03  2.1463301E+03
  2.1245286E+03  2.1029485E+03  2.0815877E+03  2.0604438E+03
  2.0395147E+03  2.0187982E+03  1.9982921E+03  1.9779943E+03
  1.9579027E+03  1.9380152E+03  1.9183296E+03  1.8988441E+03
  1.8795564E+03  1.8604647E+03  1.8415669E+03  1.8228611E+03
  1.8043452E+03  1.7860174E+03  1.7678759E+03  1.7499185E+03
  1.7321436E+03  1.7145492E+03  1.6971336E+03  1.6798948E+03
  1.6628312E+03  1.6459409E+03  1.6292221E+03  1.6126732E+03
  1.5962923E+03  1.5800779E+03  1.5640281E+03  1.5481414E+03
  1.5324160E+03  1.5168504E+03  1.5014429E+03  1.4861919E+03
  1.4710958E+03  1.4561530E+03  1.4413621E+03  1.4267213E+03
  1.4122293E+03  1.3978845E+03  1.3836854E+03  1.3696305E+03
  1.3557184E+03  1.3419476E+03  1.3283167E+03  1.3148242E+03
  1.3014688E+03  1.2882490E+03  1.2751635E+03  1.2622110E+03
  1.2493900E+03  1.2366992E+03  1.2241373E+03  1.2117031E+03
  1.1993951E+03  1.1872122E+03  1.1751530E+03  1.1632163E+03
  1.1514008E+03  1.1397054E+03  1.1281288E+03  1.1166697E+03
  1.1053271E+03  1.0940996E+03  1.0829862E+03  1.0719857E+03
  1.0610970E+03  1.0503188E+03  1.0396501E+03  1.0290898E+03
  1.0186367E+03  1.0082899E+03  9.9804810E+02  9.8791035E+02
  9.7787558E+02  9.6794275E+02  9.5811080E+02  9.4837872E+02
  9.3874550E+02  9.2921013E+02  9.1977161E+02  9.1042897E+02
  9.0118122E+02  8.9202741E+02  8.8296658E+02  8.7399778E+02
  8.6512009E+02  8.5633257E+02  8.4763431E+02  8.3902441E+02
  8.3050196E+02  8.2206608E+02  8.1371589E+02  8.0545051E+02
  7.9726909E+02  7.8917077E+02  7.8115472E+02  7.7322008E+02
  7.6536605E+02  7.5759179E+02  7.4989650E+02  7.4227937E+02
  7.3473962E+02  7.2727645E+02  7.1988908E+02  7.1257676E+02
  7.0533871E+02  6.9817419E+02  6.9108243E+02  6.8406272E+02
  6.7711430E+02  6.7023646E+02  6.6342849E+02  6.5668967E+02
  6.5001930E+02  6.4341668E+02  6.3688113E+02  6.3041197E+02
  6.2400851E+02  6.1767010E+02  6.1139608E+02  6.0518578E+02
  5.9903856E+02  5.9295379E+02  5.8693082E+02  5.8096903E+02
  5.7506779E+02  5.6922650E+02  5.6344454E+02  5.5772132E+02
  5.5205622E+02  5.4644867E+02  5.4089808E+02  5.3540387E+02
  5.2996547E+02  5.2458231E+02  5.1925383E+02  5.1397947E+02
  5.0875869E+02  5.0359094E+02  4.9847568E+02  4.9341238E+02
  4.8840050E+02  4.8343954E+02  4.7852897E+02  4.7366828E+02
  4.6885696E+02  4.6409451E+02  4.5938044E+02  4.5471425E+02
  4.5009546E+02  4.4552359E+02  4.4099815E+02  4.3651868E+02
  4.3208471E+02  4.2769578E+02  4.2335143E+02  4.1905121E+02
  4.1479467E+02  4.1058136E+02  4.0641085E+02  4.0228271E+02
  3.9819649E+02  3.9415178E+02  3.9014816E+02  3.8618520E+02
  3.8226250E+02  3.7837964E+02  3.7453622E+02  3.7073184E+02
  3.6696611E+02  3.6323863E+02  3.5954900E+02  3.5589686E+02
  3.5228181E+02  3.4870349E+02  3.4516151E+02  3.4165550E+02
  3.3818511E+02  3.3474997E+02  3.3134973E+02  3.2798402E+02
  3.2465250E+02  3.2135482E+02  3.1809064E+02  3.1485961E+02
  3.1166140E+02  3.0849568E+02  3.0536211E+02  3.0226037E+02
  2.9919014E+02  2.9615110E+02  2.9314292E+02  2.9016530E+02
  2.8721793E+02  2.8430049E+02  2.8141269E+02  2.7855422E+02
  2.7572479E+02  2.7292409E+02  2.7015185E+02  2.6740776E+02
  2.6469155E+02  2.6200293E+02  2.5934161E+02  2.5670733E+02
  2.5409981E+02  2.5151877E+02  2.4896395E+02  2.4643509E+02
  2.4393190E+02  2.4145415E+02  2.3900156E+02  2.3657389E+02
  2.3417087E+02  2.3179226E+02  2.2943782E+02  2.2710729E+02
  2.2480043E+02  2.2251700E+02  2.2025677E+02  2.1801950E+02
  2.1580495E+02  2.1361289E+02  2.1144311E+02  2.0929536E+02
  2.0716943E+02  2.0506509E+02  2.0298213E+02  2.0092032E+02
  1.9887946E+02  1.9685933E+02  1.9485971E+02  1.9288041E+02
  1.9092122E+02  1.8898192E+02  1.8706232E+02  1.8516223E+02
  1.8328143E+02  1.8141973E+02  1.7957695E+02  1.7775288E+02
  1.7594735E+02  1.7416015E+02  1.7239111E+02  1.7064003E+02
  1.6890674E+02  1.6719106E+02  1.6549281E+02  1.6381180E+02
  1.6214787E+02  1.6050084E+02  1.5887054E+02  1.5725681E+02
  1.5565946E+02  1.5407834E+02  1.5254572E+02  1.5099661E+02
  1.4946313E+02  1.4794506E+02  1.4644218E+02  1.4495425E+02
  1.4348108E+02  1.4202244E+02  1.4057812E+02  1.3914790E+02
  1.3773158E+02  1.3632894E+02  1.3493979E+02  1.3356391E+02
  1.3220110E+02  1.3085117E+02  1.2951390E+02  1.2818912E+02
  1.2687661E+02  1.2557619E+02  1.2428766E+02  1.2301084E+02
  1.2174554E+02  1.2049156E+02  1.1924873E+02  1.1801687E+02
  1.1679578E+02  1.1558530E+02  1.1438524E+02  1.1319543E+02
  1.1201570E+02  1.1084587E+02  1.0968577E+02  1.0853524E+02
  1.0739410E+02  1.0626220E+02  1.0513936E+02  1.0402543E+02
  1.0292024E+02  1.0182365E+02  1.0073548E+02  9.9655583E+01
  9.8583810E+01  9.7520006E+01  9.6464022E+01  9.5415709E+01
  9.4374919E+01  9.3341507E+01  9.2315330E+01  9.1296245E+01
  9.0284112E+01  8.9278792E+01  8.8280148E+01  8.7288043E+01
  8.6302345E+01  8.5322919E+01  8.4349636E+01  8.3382365E+01
  8.2420979E+01  8.1465351E+01  8.0515357E+01  7.9570873E+01
  7.8631777E+01  7.7697949E+01  7.6769270E+01  7.5845624E+01
  7.4926893E+01  7.4012964E+01  7.3103725E+01  7.2199062E+01
  7.1298868E+01  7.0403032E+01  6.9511449E+01  6.8624012E+01
  6.7740618E+01  6.6861164E+01  6.5985548E+01  6.5113670E+01
  6.4245433E+01  6.3380738E+01  6.2519491E+01  6.1661597E+01
  6.0806963E+01  5.9955497E+01  5.9107109E+01  5.8261711E+01
  5.7419215E+01  5.6579535E+01  5.5742585E+01  5.4908283E+01
  5.4076546E+01  5.3247293E+01  5.2420445E+01  5.1595923E+01
  5.0773651E+01  4.9953553E+01  4.9135554E+01  4.8319581E+01
  4.7505562E+01  4.6693427E+01  4.5883106E+01  4.5074531E+01
  4.4267635E+01  4.3462353E+01  4.2658619E+01  4.1856371E+01
  4.1055547E+01  4.0256085E+01  3.9457926E+01  3.8661011E+01
  3.7865284E+01  3.7070687E+01  3.6277167E+01  3.5484668E+01
  3.4693139E+01  3.3902527E+01  3.3112783E+01  3.2323857E+01
  3.1535701E+01  3.0748267E+01  2.9961510E+01  2.9175385E+01
  2.8389849E+01  2.7604857E+01  2.6820369E+01  2.6036344E+01
  2.5252743E+01  2.4469527E+01  2.3686659E+01  2.2904102E+01
  2.2121821E+01  2.1339781E+01  2.0557950E+01  1.9776295E+01
  1.8994785E+01  1.8213389E+01  1.7432078E+01  1.6650824E+01
  1.5869599E+01  1.5088378E+01  1.4307134E+01  1.3525843E+01
  1.2744482E+01  1.1963027E+01  1.1181458E+01  1.0399754E+01
  9.6178943E+00  8.8358603E+00  8.0536342E+00  7.2711988E+00
  6.4885378E+00  5.7056358E+00  4.9224785E+00  4.1390521E+00
  3.3553440E+00  2.5713421E+00  1.7870356E+00  1.0024141E+00
  2.1746817E-01 -5.6781064E-01 -1.3534301E+00 -2.1393973E+00
 -2.9257181E+00 -3.7123981E+00 -4.4994418E+00 -5.2868530E+00
 -6.0746346E+00 -6.8627889E+00 -7.6513175E+00 -8.4402209E+00
 -9.2294993E+00 -1.0019152E+01 -1.0809177E+01 -1.1599573E+01
 -1.2390336E+01 -1.3181464E+01 -1.3972950E+01 -1.4764792E+01
 -1.5556982E+01 -1.6349515E+01 -1.7142384E+01 -1.7935580E+01
 -1.8729096E+01 -1.9522922E+01 -2.0317048E+01 -2.1111465E+01
 -2.1906161E+01 -2.2701126E+01 -2.3496345E+01 -2.4291808E+01
 -2.5087500E+01 -2.5883408E+01 -2.6679517E+01 -2.7475811E+01
 -2.8272276E+01 -2.9068894E+01 -2.9865649E+01 -3.0662524E+01
 -3.1459501E+01 -3.2256560E+01 -3.3053684E+01 -3.3850853E+01
 -3.4648046E+01 -3.5445243E+01 -3.6242423E+01 -3.7039565E+01
 -3.7836646E+01 -3.8633644E+01 -3.9430537E+01 -4.0227299E+01
 -4.1023909E+01 -4.1820340E+01 -4.2616570E+01 -4.3412571E+01
 -4.4208320E+01 -4.5003789E+01 -4.5798952E+01 -4.6593782E+01
 -4.7388252E+01 -4.8182334E+01 -4.8976001E+01 -4.9769223E+01
 -5.0561973E+01 -5.1354220E+01 -5.2145935E+01 -5.2937088E+01
 -5.3727650E+01 -5.4517589E+01 -5.5306874E+01 -5.6095476E+01
 -5.6883360E+01 -5.7670497E+01 -5.8456854E+01 -5.9242399E+01
 -6.0027098E+01 -6.0810918E+01 -6.1593828E+01 -6.2375792E+01
 -6.3156778E+01 -6.3936750E+01 -6.4715676E+01 -6.5493520E+01
 -6.6270248E+01 -6.7045824E+01 -6.7820214E+01 -6.8593382E+01
 -6.9365293E+01 -7.0135910E+01 -7.0905198E+01 -7.1673121E+01
 -7.2439643E+01 -7.3204727E+01 -7.3968336E+01 -7.4730433E+01
 -7.5490983E+01 -7.6249947E+01 -7.7007288E+01 -7.7762970E+01
 -7.8516954E+01 -7.9269204E+01 -8.0019682E+01 -8.0768350E+01
 -8.1515169E+01 -8.2260104E+01 -8.3003114E+01 -8.3744164E+01
 -8.4483213E+01 -8.5220225E+01 -8.5955162E+01 -8.6687984E+01
 -8.7418654E+01 -8.8147134E+01 -8.8873385E+01 -8.9597370E+01
 -9.0319049E+01 -9.1038385E+01 -9.1755340E+01 -9.2469875E+01
 -9.3181952E+01 -9.3891534E+01 -9.4598581E+01 -9.5303056E+01
 -9.6004922E+01 -9.6704140E+01 -9.7400672E+01 -9.8094481E+01
 -9.8785528E+01 -9.9473778E+01 -1.0015919E+02 -1.0084173E+02
 -1.0152136E+02 -1.0219804E+02 -1.0287174E+02 -1.0354241E+02
 -1.0421003E+02 -1.0487456E+02 -1.0553595E+02 -1.0619417E+02
 -1.0684919E+02 -1.0750098E+02 -1.0814948E+02 -1.0879468E+02
 -1.0943653E+02 -1.1007501E+02 -1.1071006E+02 -1.1134167E+02
 -1.1196979E+02 -1.1259439E+02 -1.1321544E+02 -1.1383291E+02
 -1.1444676E+02 -1.1505695E+02 -1.1566346E+02 -1.1626625E+02
 -1.1686529E+02 -1.1746055E+02 -1.1805199E+02 -1.1863959E+02
 -1.1922331E+02 -1.1980313E+02 -1.2037901E+02 -1.2095092E+02
 -1.2151884E+02 -1.2208272E+02 -1.2264256E+02 -1.2319831E+02
 -1.2374994E+02 -1.2429744E+02 -1.2484077E+02 -1.2537991E+02
 -1.2591482E+02 -1.2644549E+02 -1.2697188E+02 -1.2749398E+02
 -1.2801175E+02 -1.2852517E+02 -1.2903422E+02 -1.2953888E+02
 -1.3003911E+02 -1.3053491E+02 -1.3102624E+02 -1.3151308E+02
 -1.3199542E+02 -1.3247323E+02 -1.3294649E+02 -1.3341519E+02
 -1.3387929E+02 -1.3433879E+02 -1.3479367E+02 -1.3524391E+02
 -1.3568948E+02 -1.3613039E+02 -1.3656660E+02 -1.3699810E+02
 -1.3742488E+02 -1.3784693E+02 -1.3826423E+02 -1.3867677E+02
 -1.3908453E+02 -1.3948750E+02 -1.3988568E+02 -1.4027905E+02
 -1.4066760E+02 -1.4105133E+02 -1.4143021E+02 -1.4180426E+02
 -1.4217345E+02 -1.4253778E+02 -1.4289725E+02 -1.4325185E+02
 -1.4360157E+02 -1.4394642E+02 -1.4428639E+02 -1.4462147E+02
 -1.4495166E+02 -1.4527697E+02 -1.4559739E+02 -1.4591293E+02
 -1.4622358E+02 -1.4652935E+02 -1.4683023E+02 -1.4712624E+02
 -1.4741737E+02 -1.4770364E+02 -1.4798504E+02 -1.4826159E+02
 -1.4853329E+02 -1.4880015E+02 -1.4906218E+02 -1.4931939E+02
 -1.4957178E+02 -1.4981938E+02 -1.5006219E+02 -1.5030023E+02
 -1.5053350E+02 -1.5076204E+02 -1.5098584E+02 -1.5120493E+02
 -1.5141933E+02 -1.5162906E+02 -1.5183412E+02 -1.5203455E+02
 -1.5223037E+02 -1.5242159E+02 -1.5260825E+02 -1.5279035E+02
 -1.5296794E+02 -1.5314104E+02 -1.5330966E+02 -1.5347385E+02
 -1.5363363E+02 -1.5378903E+02 -1.5394007E+02 -1.5408680E+02
 -1.5422924E+02 -1.5436744E+02 -1.5450141E+02 -1.5463121E+02
 -1.5475686E+02 -1.5487841E+02 -1.5499589E+02 -1.5510934E+02
 -1.5521881E+02 -1.5532434E+02 -1.5542597E+02 -1.5552374E+02
 -1.5561770E+02 -1.5570790E+02 -1.5579439E+02 -1.5587720E+02
 -1.5595641E+02 -1.5603204E+02 -1.5610417E+02 -1.5617283E+02
 -1.5623809E+02 -1.5630000E+02 -1.5635861E+02 -1.5641399E+02
 -1.5646620E+02 -1.5651529E+02 -1.5656133E+02 -1.5660437E+02
 -1.5664449E+02 -1.5668175E+02 -1.5671621E+02 -1.5674794E+02
 -1.5677702E+02 -1.5680350E+02 -1.5682747E+02 -1.5684900E+02
 -1.5686815E+02 -1.5688501E+02 -1.5689965E+02 -1.5691214E+02
 -1.5692257E+02 -1.5693103E+02 -1.5693758E+02 -1.5694231E+02
 -1.5694531E+02 -1.5694666E+02 -1.5703113E+02 -1.5702963E+02
 -1.5702662E+02 -1.5702212E+02 -1.5701611E+02 -1.5700861E+02
 -1.5699963E+02 -1.5698917E+02 -1.5697723E+02 -1.5696382E+02
 -1.5694894E+02 -1.5693260E+02 -1.5691481E+02 -1.5689557E+02
 -1.5687488E+02 -1.5685275E+02 -1.5682918E+02 -1.5680419E+02
 -1.5677777E+02 -1.5674993E+02 -1.5672068E+02 -1.5669001E+02
 -1.5665795E+02 -1.5662448E+02 -1.5658962E+02 -1.5655337E+02
 -1.5651573E+02 -1.5647672E+02 -1.5643633E+02 -1.5639458E+02
 -1.5635146E+02 -1.5630698E+02 -1.5626115E+02 -1.5621397E+02
 -1.5616545E+02 -1.5611559E+02 -1.5606440E+02 -1.5601188E+02
 -1.5595803E+02 -1.5590287E+02 -1.5584640E+02 -1.5578862E+02
 -1.5572954E+02 -1.5566916E+02 -1.5560749E+02 -1.5554453E+02
 -1.5548030E+02 -1.5541478E+02 -1.5534799E+02 -1.5527994E+02
 -1.5521063E+02 -1.5514006E+02 -1.5506824E+02 -1.5499517E+02
 -1.5492086E+02 -1.5484532E+02 -1.5476855E+02 -1.5469055E+02
 -1.5461133E+02 -1.5453090E+02 -1.5444926E+02 -1.5436641E+02
 -1.5428236E+02 -1.5419712E+02 -1.5411069E+02 -1.5402307E+02
 -1.5393428E+02 -1.5384431E+02 -1.5375317E+02 -1.5366087E+02
 -1.5356741E+02 -1.5347279E+02 -1.5337703E+02 -1.5328012E+02
 -1.5318208E+02 -1.5308290E+02 -1.5298260E+02 -1.5288117E+02
 -1.5277862E+02 -1.5267496E+02 -1.5257020E+02 -1.5246433E+02
 -1.5235736E+02 -1.5224930E+02 -1.5214016E+02 -1.5202993E+02
 -1.5191863E+02 -1.5180625E+02 -1.5169281E+02 -1.5157831E+02
 -1.5146275E+02 -1.5134614E+02 -1.5122848E+02 -1.5110978E+02
 -1.5099005E+02 -1.5086928E+02 -1.5074749E+02 -1.5062468E+02
 -1.5050086E+02 -1.5037602E+02 -1.5025018E+02 -1.5012334E+02
 -1.4999550E+02 -1.4986667E+02 -1.4973686E+02 -1.4960607E+02
 -1.4947431E+02 -1.4934157E+02 -1.4920787E+02 -1.4907322E+02
 -1.4893760E+02 -1.4880104E+02 -1.4866354E+02 -1.4852510E+02
 -1.4838572E+02 -1.4824542E+02 -1.4810419E+02 -1.4796204E+02
 -1.4781899E+02 -1.4767502E+02 -1.4753015E+02 -1.4738438E+02
 -1.4723772E+02 -1.4709018E+02 -1.4694175E+02 -1.4679244E+02
 -1.4664226E+02 -1.4649122E+02 -1.4633931E+02 -1.4618655E+02
 -1.4603293E+02 -1.4587847E+02 -1.4572317E+02 -1.4556703E+02
 -1.4541006E+02 -1.4525226E+02 -1.4509364E+02 -1.4493421E+02
 -1.4477397E+02 -1.4461292E+02 -1.4445107E+02 -1.4428842E+02
 -1.4412499E+02 -1.4396077E+02 -1.4379577E+02 -1.4362999E+02
 -1.4346345E+02 -1.4329614E+02 -1.4312807E+02 -1.4295925E+02
 -1.4278968E+02 -1.4261936E+02 -1.4244831E+02 -1.4227652E+02
 -1.4210400E+02 -1.4193076E+02 -1.4175680E+02 -1.4158213E+02
 -1.4140675E+02 -1.4123067E+02 -1.4105389E+02 -1.4087641E+02
 -1.4069825E+02 -1.4051940E+02 -1.4033988E+02 -1.4015969E+02
 -1.3997882E+02 -1.3979730E+02 -1.3961512E+02 -1.3943228E+02
 -1.3924880E+02 -1.3906468E+02 -1.3887992E+02 -1.3869453E+02
 -1.3850852E+02 -1.3832188E+02 -1.3813463E+02 -1.3794676E+02
 -1.3775829E+02 -1.3756922E+02 -1.3737956E+02 -1.3718930E+02
 -1.3699846E+02 -1.3680703E+02 -1.3661504E+02 -1.3642247E+02
 -1.3622934E+02 -1.3603564E+02 -1.3584140E+02 -1.3564660E+02
 -1.3545126E+02 -1.3525538E+02 -1.3505896E+02 -1.3486202E+02
 -1.3466455E+02 -1.3446657E+02 -1.3426807E+02 -1.3406906E+02
 -1.3386955E+02 -1.3366954E+02 -1.3346903E+02 -1.3326804E+02
 -1.3306657E+02 -1.3286462E+02 -1.3266219E+02 -1.3245930E+02
 -1.3225594E+02 -1.3205213E+02 -1.3184786E+02 -1.3164315E+02
 -1.3143800E+02 -1.3123241E+02 -1.3102638E+02 -1.3081993E+02
 -1.3061306E+02 -1.3040578E+02 -1.3019808E+02 -1.2998997E+02
 -1.2978147E+02 -1.2957256E+02 -1.2936327E+02 -1.2915359E+02
 -1.2894353E+02 -1.2873310E+02 -1.2852229E+02 -1.2831112E+02
 -1.2809959E+02 -1.2788771E+02 -1.2767547E+02 -1.2746289E+02
 -1.2724997E+02 -1.2703672E+02 -1.2682314E+02 -1.2660923E+02
 -1.2639500E+02 -1.2618046E+02 -1.2596561E+02 -1.2575046E+02
 -1.2553500E+02 -1.2531926E+02 -1.2510322E+02 -1.2488691E+02
 -1.2467031E+02 -1.2445344E+02 -1.2423630E+02 -1.2401890E+02
 -1.2380125E+02 -1.2358334E+02 -1.2336518E+02 -1.2314678E+02
 -1.2292814E+02 -1.2270927E+02 -1.2249017E+02 -1.2227086E+02
 -1.2205132E+02 -1.2183157E+02 -1.2161162E+02 -1.2139147E+02
 -1.2117111E+02 -1.2095057E+02 -1.2072984E+02 -1.2050893E+02
 -1.2028785E+02 -1.2006659E+02 -1.1984517E+02 -1.1962359E+02
 -1.1940185E+02 -1.1917996E+02 -1.1895793E+02 -1.1873576E+02
 -1.1851345E+02 -1.1829101E+02 -1.1806845E+02 -1.1784577E+02
 -1.1762298E+02 -1.1740007E+02 -1.1717706E+02 -1.1695395E+02
 -1.1673075E+02 -1.1650746E+02 -1.1628408E+02 -1.1606063E+02
 -1.1583710E+02 -1.1561351E+02 -1.1538985E+02 -1.1516614E+02
 -1.1494237E+02 -1.1471855E+02 -1.1449469E+02 -1.1427079E+02
 -1.1404686E+02 -1.1382290E+02 -1.1359892E+02 -1.1337493E+02
 -1.1315092E+02 -1.1292690E+02 -1.1270289E+02 -1.1247887E+02
 -1.1225487E+02 -1.1203087E+02 -1.1180690E+02 -1.1158295E+02
 -1.1135903E+02 -1.1113514E+02 -1.1091130E+02 -1.1068749E+02
 -1.1046374E+02 -1.1024004E+02 -1.1001640E+02 -1.0979283E+02
 -1.0956932E+02 -1.0934589E+02 -1.0912254E+02 -1.0889928E+02
 -1.0867610E+02 -1.0845303E+02 -1.0823005E+02 -1.0800718E+02
 -1.0778441E+02 -1.0756177E+02 -1.0733924E+02 -1.0711685E+02
 -1.0689458E+02 -1.0667245E+02 -1.0645046E+02 -1.0622862E+02
 -1.0600693E+02 -1.0578540E+02 -1.0556402E+02 -1.0534282E+02
 -1.0512179E+02 -1.0490093E+02 -1.0468026E+02 -1.0445978E+02
 -1.0423949E+02 -1.0401939E+02 -1.0379950E+02 -1.0357982E+02
 -1.0336035E+02 -1.0314110E+02 -1.0292207E+02 -1.0270327E+02
 -1.0248471E+02 -1.0226638E+02 -1.0204830E+02 -1.0183046E+02
 -1.0161289E+02 -1.0139557E+02 -1.0117851E+02 -1.0096172E+02
 -1.0074521E+02 -1.0052898E+02 -1.0031303E+02 -1.0009738E+02
 -9.9882017E+01 -9.9666956E+01 -9.9452200E+01 -9.9237755E+01
 -9.9023625E+01 -9.8809816E+01 -9.8596333E+01 -9.8383181E+01
 -9.8170365E+01 -9.7957890E+01 -9.7745761E+01 -9.7533984E+01
 -9.7322564E+01 -9.7111505E+01 -9.6900813E+01 -9.6690493E+01
 -9.6480550E+01 -9.6270989E+01 -9.6061816E+01 -9.5853035E+01
 -9.5644651E+01 -9.5436670E+01 -9.5229097E+01 -9.5021936E+01
 -9.4815194E+01 -9.4608875E+01 -9.4402984E+01 -9.4197526E+01
 -9.3992507E+01 -9.3787932E+01 -9.3583805E+01 -9.3380132E+01
 -9.3176918E+01 -9.2974168E+01 -9.2771887E+01 -9.2570080E+01
 -9.2368753E+01 -9.2167911E+01 -9.1967558E+01 -9.1767700E+01
 -9.1605211E+01 -9.1406394E+01 -9.1208079E+01 -9.1010267E+01
 -9.0812955E+01 -9.0616141E+01 -9.0419826E+01 -9.0224006E+01
 -9.0028681E+01 -8.9833849E+01 -8.9639508E+01 -8.9445658E+01
 -8.9252297E+01 -8.9059424E+01 -8.8867036E+01 -8.8675133E+01
 -8.8483714E+01 -8.8292776E+01 -8.8102319E+01 -8.7912341E+01
 -8.7722841E+01 -8.7533817E+01 -8.7345268E+01 -8.7157193E+01
 -8.6969590E+01 -8.6782458E+01 -8.6595796E+01 -8.6409602E+01
 -8.6223875E+01 -8.6038613E+01 -8.5853816E+01 -8.5669481E+01
 -8.5485608E+01 -8.5302196E+01 -8.5119242E+01 -8.4936746E+01
 -8.4754706E+01 -8.4573121E+01 -8.4391990E+01 -8.4211312E+01
 -8.4031084E+01 -8.3851307E+01 -8.3671978E+01 -8.3493096E+01
 -8.3314660E+01 -8.3136669E+01 -8.2959121E+01 -8.2782016E+01
 -8.2605352E+01 -8.2429127E+01 -8.2253341E+01 -8.2077992E+01
 -8.1903079E+01 -8.1728600E+01 -8.1554555E+01 -8.1380943E+01
 -8.1207761E+01 -8.1035010E+01 -8.0862686E+01 -8.0690791E+01
 -8.0519321E+01 -8.0348276E+01 -8.0177655E+01 -8.0007457E+01
 -7.9837680E+01 -7.9668323E+01 -7.9499385E+01 -7.9330865E+01
 -7.9162761E+01 -7.8995073E+01 -7.8827800E+01 -7.8660939E+01
 -7.8494490E+01 -7.8328452E+01 -7.8162824E+01 -7.7997604E+01
 -7.7832791E+01 -7.7668385E+01 -7.7504383E+01 -7.7340786E+01
 -7.7177591E+01 -7.7014798E+01 -7.6852405E+01 -7.6690411E+01
 -7.6528816E+01 -7.6367618E+01 -7.6206816E+01 -7.6046409E+01
 -7.5886395E+01 -7.5726775E+01 -7.5567546E+01 -7.5408707E+01
 -7.5250257E+01 -7.5092196E+01 -7.4934523E+01 -7.4777235E+01
 -7.4620332E+01 -7.4463813E+01 -7.4307678E+01 -7.4151924E+01
 -7.3996550E+01 -7.3841557E+01 -7.3686942E+01 -7.3532704E+01
 -7.3378843E+01 -7.3225358E+01 -7.3072247E+01 -7.2919509E+01
 -7.2767144E+01 -7.2615150E+01 -7.2463526E+01 -7.2312272E+01
 -7.2161386E+01 -7.2010867E+01 -7.1860714E+01 -7.1710926E+01
 -7.1561502E+01 -7.1412442E+01 -7.1263743E+01 -7.1115406E+01
 -7.0967429E+01 -7.0819811E+01 -7.0672551E+01 -7.0525648E+01
 -7.0379101E+01 -7.0232909E+01 -7.0087072E+01 -6.9941588E+01
 -6.9796456E+01 -6.9651675E+01 -6.9507244E+01 -6.9363163E+01
 -6.9219430E+01 -6.9076044E+01 -6.8933005E+01 -6.8790311E+01
 -6.8647962E+01 -6.8505956E+01 -6.8364293E+01 -6.8222972E+01
 -6.8081991E+01 -6.7941350E+01 -6.7801048E+01 -6.7661083E+01
 -6.7521456E+01 -6.7382165E+01 -6.7243209E+01 -6.7104587E+01
 -6.6966298E+01 -6.6828342E+01 -6.6690717E+01 -6.6553423E+01
 -6.6416458E+01 -6.6279822E+01 -6.6143514E+01 -6.6007533E+01
 -6.5871878E+01 -6.5736548E+01 -6.5601542E+01 -6.5466860E+01
 -6.5332500E+01 -6.5198462E+01 -6.5064744E+01 -6.4931347E+01
 -6.4798268E+01 -6.4665507E+01 -6.4533064E+01 -6.4400937E+01
 -6.4269125E+01 -6.4137629E+01 -6.4006445E+01 -6.3875575E+01
 -6.3745017E+01 -6.3614770E+01 -6.3484834E+01 -6.3355207E+01
 -6.3225888E+01 -6.3096878E+01 -6.2968175E+01 -6.2839777E+01
 -6.2711685E+01 -6.2583898E+01 -6.2456414E+01 -6.2329233E+01
 -6.2202355E+01 -6.2075777E+01 -6.1949500E+01 -6.1823522E+01
 -6.1697844E+01 -6.1572463E+01 -6.1447379E+01 -6.1322592E+01
 -6.1198100E+01 -6.1073903E+01 -6.0950000E+01 -6.0826390E+01
 -6.0703072E+01 -6.0580046E+01 -6.0457311E+01 -6.0334866E+01
 -6.0212710E+01 -6.0090843E+01 -5.9969263E+01 -5.9847970E+01
 -5.9726963E+01 -5.9606242E+01 -5.9485805E+01 -5.9365652E+01
 -5.9245782E+01 -5.9126194E+01 -5.9006888E+01 -5.8887862E+01
 -5.8769117E+01 -5.8650651E+01 -5.8532463E+01 -5.8414553E+01
 -5.8296920E+01 -5.8179564E+01 -5.8062483E+01 -5.7945676E+01
 -5.7829144E+01 -5.7712885E+01 -5.7596899E+01 -5.7481184E+01
 -5.7365741E+01 -5.7250568E+01 -5.7135665E+01 -5.7021030E+01
 -5.6906664E+01 -5.6792566E+01 -5.6678734E+01 -5.6565168E+01
 -5.6451868E+01 -5.6338833E+01 -5.6226061E+01 -5.6113553E+01
 -5.6001307E+01 -5.5889323E+01 -5.5777600E+01 -5.5666138E+01
 -5.5554935E+01 -5.5443992E+01 -5.5333307E+01 -5.5222880E+01
 -5.5112709E+01 -5.5002795E+01 -5.4893137E+01 -5.4783734E+01
 -5.4674585E+01 -5.4565689E+01 -5.4457047E+01 -5.4348657E+01
 -5.4240518E+01 -5.4132631E+01 -5.4024993E+01 -5.3917606E+01
 -5.3810467E+01 -5.3703576E+01 -5.3596933E+01 -5.3490538E+01
 -5.3384388E+01 -5.3278484E+01 -5.3172825E+01 -5.3067411E+01
 -5.2962240E+01 -5.2857313E+01 -5.2752627E+01 -5.2648184E+01
 -5.2543982E+01 -5.2440020E+01 -5.2336298E+01 -5.2232816E+01
 -5.2129572E+01 -5.2026566E+01 -5.1923798E+01 -5.1821266E+01
 -5.1718970E+01 -5.1616910E+01 -5.1515085E+01 -5.1413494E+01
 -5.1312137E+01 -5.1211012E+01 -5.1110121E+01 -5.1009461E+01
 -5.0909032E+01 -5.0808834E+01 -5.0708866E+01 -5.0609127E+01
 -5.0509617E+01 -5.0410335E+01 -5.0311281E+01 -5.0212454E+01
 -5.0113853E+01 -5.0015478E+01 -4.9917328E+01 -4.9819403E+01
 -4.9721702E+01 -4.9624225E+01 -4.9526970E+01 -4.9429937E+01
 -4.9333127E+01 -4.9236537E+01 -4.9140168E+01 -4.9044019E+01
 -4.8948090E+01 -4.8852379E+01 -4.8756886E+01 -4.8661612E+01
 -4.8566554E+01 -4.8471713E+01 -4.8377088E+01 -4.8282678E+01
 -4.8188483E+01 -4.8094503E+01 -4.8000736E+01 -4.7907183E+01
 -4.7813842E+01 -4.7720713E+01 -4.7627796E+01 -4.7535090E+01
 -4.7442594E+01 -4.7350309E+01 -4.7258232E+01 -4.7166365E+01
 -4.7074705E+01 -4.6983254E+01 -4.6892009E+01 -4.6800972E+01
 -4.6710140E+01 -4.6619514E+01 -4.6529093E+01 -4.6438877E+01
 -4.6348865E+01 -4.6259056E+01 -4.6169450E+01 -4.6080046E+01
 -4.5990845E+01 -4.5901845E+01 -4.5813045E+01 -4.5724447E+01
 -4.5636047E+01 -4.5547848E+01 -4.5459847E+01 -4.5372044E+01
 -4.5284439E+01 -4.5197032E+01 -4.5109821E+01 -4.5022806E+01
 -4.4935987E+01 -4.4849364E+01 -4.4762935E+01 -4.4676700E+01
 -4.4590660E+01 -4.4504812E+01 -4.4419157E+01 -4.4333695E+01
 -4.4248424E+01 -4.4163344E+01 -4.4078456E+01 -4.3993757E+01
 -4.3909249E+01 -4.3824930E+01 -4.3740799E+01 -4.3656857E+01
 -4.3573103E+01 -4.3489536E+01 -4.3406157E+01 -4.3322963E+01
 -4.3239956E+01 -4.3157134E+01 -4.3074497E+01 -4.2992045E+01
 -4.2909776E+01 -4.2827692E+01 -4.2745790E+01 -4.2664071E+01
 -4.2582535E+01 -4.2501180E+01 -4.2420006E+01 -4.2339013E+01
 -4.2258201E+01 -4.2177568E+01 -4.2097115E+01 -4.2016841E+01
 -4.1936745E+01 -4.1856828E+01 -4.1777088E+01 -4.1697525E+01
 -4.1618139E+01 -4.1538929E+01 -4.1459895E+01 -4.1381037E+01
 -4.1302353E+01 -4.1223844E+01 -4.1145509E+01 -4.1067347E+01
 -4.0989359E+01 -4.0911544E+01 -4.0833900E+01 -4.0756429E+01
 -4.0679129E+01 -4.0602000E+01 -4.0525042E+01 -4.0448253E+01
 -4.0371635E+01 -4.0295185E+01 -4.0218905E+01 -4.0142793E+01
 -4.0066849E+01 -3.9991072E+01 -3.9915463E+01 -3.9840020E+01
 -3.9764744E+01 -3.9689633E+01 -3.9614688E+01 -3.9539908E+01
 -3.9465293E+01 -3.9390842E+01 -3.9316555E+01 -3.9242431E+01
 -3.9168470E+01 -3.9094671E+01 -3.9021035E+01 -3.8947561E+01
 -3.8874248E+01 -3.8801096E+01 -3.8728104E+01 -3.8655273E+01
 -3.8582601E+01 -3.8510089E+01 -3.8437736E+01 -3.8365541E+01
 -3.8293504E+01 -3.8221625E+01 -3.8149904E+01 -3.8078339E+01
 -3.8006931E+01 -3.7935679E+01 -3.7864583E+01 -3.7793642E+01
 -3.7722857E+01 -3.7652226E+01 -3.7581749E+01 -3.7511426E+01
 -3.7441257E+01 -3.7371240E+01 -3.7301377E+01 -3.7231665E+01
 -3.7162106E+01 -3.7092698E+01 -3.7023442E+01 -3.6954336E+01
 -3.6885380E+01 -3.6816575E+01 -3.6747920E+01 -3.6679413E+01
 -3.6611056E+01 -3.6542847E+01 -3.6474787E+01 -3.6406874E+01
 -3.6339109E+01 -3.6271491E+01 -3.6204019E+01 -3.6136694E+01
 -3.6069515E+01 -3.6002482E+01 -3.5935594E+01 -3.5868851E+01
 -3.5802252E+01 -3.5735798E+01 -3.5669488E+01 -3.5603321E+01
 -3.5537297E+01 -3.5471416E+01 -3.5405678E+01 -3.5340081E+01
 -3.5274626E+01 -3.5209313E+01 -3.5144141E+01 -3.5079109E+01
 -3.5014218E+01 -3.4949467E+01 -3.4884855E+01 -3.4820383E+01
 -3.4756050E+01 -3.4691855E+01 -3.4627799E+01 -3.4563881E+01
 -3.4500100E+01 -3.4436456E+01 -3.4372950E+01 -3.4309580E+01
 -3.4246346E+01 -3.4183248E+01 -3.4120286E+01 -3.4057459E+01
 -3.3994767E+01 -3.3932210E+01 -3.3869786E+01 -3.3807497E+01
 -3.3745341E+01 -3.3683319E+01 -3.3621430E+01 -3.3559673E+01
 -3.3498048E+01 -3.3436556E+01 -3.3375195E+01 -3.3313966E+01
 -3.3252867E+01 -3.3191899E+01 -3.3131062E+01 -3.3070354E+01
 -3.3009777E+01 -3.2949329E+01 -3.2889009E+01 -3.2828819E+01
 -3.2768757E+01 -3.2708824E+01 -3.2649018E+01 -3.2589339E+01
 -3.2529788E+01 -3.2470364E+01 -3.2411067E+01 -3.2351895E+01
 -3.2292850E+01 -3.2233931E+01 -3.2175136E+01 -3.2116467E+01
 -3.2057923E+01 -3.1999503E+01 -3.1941207E+01 -3.1883035E+01
 -3.1824987E+01 -3.1767062E+01 -3.1709260E+01 -3.1651581E+01
 -3.1594024E+01 -3.1536589E+01 -3.1479275E+01 -3.1422084E+01
 -3.1365013E+01 -3.1308064E+01 -3.1251235E+01 -3.1194526E+01
 -3.1137937E+01 -3.1081468E+01 -3.1025119E+01 -3.0968888E+01
 -3.0912777E+01 -3.0856784E+01 -3.0800909E+01 -3.0745152E+01
 -3.0689514E+01 -3.0633992E+01 -3.0578588E+01 -3.0523300E+01
 -3.0468129E+01 -3.0413075E+01 -3.0358136E+01 -3.0303313E+01
 -3.0248606E+01 -3.0194014E+01 -3.0139537E+01 -3.0085174E+01
 -3.0030926E+01 -2.9976792E+01 -2.9922771E+01 -2.9868865E+01
 -2.9815071E+01 -2.9761391E+01 -2.9707823E+01 -2.9654367E+01
 -2.9601024E+01 -2.9547793E+01 -2.9494673E+01 -2.9441665E+01
 -2.9388768E+01 -2.9335982E+01 -2.9283306E+01 -2.9230741E+01
 -2.9178285E+01 -2.9125940E+01 -2.9073704E+01 -2.9021577E+01
 -2.8969559E+01 -2.8917650E+01 -2.8865850E+01 -2.8814157E+01
 -2.8762573E+01 -2.8711096E+01 -2.8659727E+01 -2.8608465E+01
 -2.8557310E+01 -2.8506262E+01 -2.8455320E+01 -2.8404484E+01
 -2.8353754E+01 -2.8303130E+01 -2.8252611E+01 -2.8202198E+01
 -2.8151889E+01 -2.8101685E+01 -2.8051586E+01 -2.8001590E+01
 -2.7951699E+01 -2.7901911E+01 -2.7852227E+01 -2.7802646E+01
 -2.7753167E+01 -2.7703792E+01 -2.7654519E+01 -2.7605348E+01
 -2.7556279E+01 -2.7507312E+01 -2.7458446E+01 -2.7409682E+01
 -2.7361018E+01 -2.7312456E+01 -2.7263993E+01 -2.7215632E+01
 -2.7167370E+01 -2.7119208E+01 -2.7071146E+01 -2.7023182E+01
 -2.6975319E+01 -2.6927554E+01 -2.6879887E+01 -2.6832319E+01
 -2.6784849E+01 -2.6737477E+01 -2.6690203E+01 -2.6643027E+01
 -2.6595947E+01 -2.6548965E+01 -2.6502079E+01 -2.6455290E+01
 -2.6408598E+01 -2.6362001E+01 -2.6315500E+01 -2.6269095E+01
 -2.6222786E+01 -2.6176572E+01 -2.6130452E+01 -2.6084428E+01
 -2.6038498E+01 -2.5992662E+01 -2.5946920E+01 -2.5901273E+01
 -2.5855719E+01 -2.5810258E+01 -2.5764891E+01 -2.5719616E+01
 -2.5674435E+01 -2.5629346E+01 -2.5584349E+01 -2.5539445E+01
 -2.5494632E+01 -2.5449911E+01 -2.5405282E+01 -2.5360744E+01
 -2.5316297E+01 -2.5271940E+01 -2.5227675E+01 -2.5183500E+01
 -2.5139415E+01 -2.5095420E+01 -2.5051515E+01 -2.5007699E+01
 -2.4963973E+01 -2.4920336E+01 -2.4876788E+01 -2.4833329E+01
 -2.4789958E+01 -2.4746676E+01 -2.4703482E+01 -2.4660376E+01
 -2.4617357E+01 -2.4574426E+01 -2.4531583E+01 -2.4488826E+01
 -2.4446156E+01 -2.4403573E+01 -2.4361077E+01 -2.4318667E+01
 -2.4276343E+01 -2.4234105E+01 -2.4191952E+01 -2.4149886E+01
 -2.4107904E+01 -2.4066008E+01 -2.4024196E+01 -2.3982469E+01
 -2.3940827E+01 -2.3899269E+01 -2.3857795E+01 -2.3816406E+01
 -2.3775099E+01 -2.3733877E+01 -2.3692738E+01 -2.3651682E+01
 -2.3610709E+01 -2.3569819E+01 -2.3529011E+01 -2.3488286E+01
 -2.3447643E+01 -2.3407082E+01 -2.3366602E+01 -2.3326205E+01
 -2.3285889E+01 -2.3245654E+01 -2.3205500E+01 -2.3165428E+01
 -2.3125436E+01 -2.3085524E+01 -2.3045693E+01 -2.3005942E+01
 -2.2966271E+01 -2.2926679E+01 -2.2887167E+01 -2.2847735E+01
 -2.2808382E+01 -2.2769108E+01 -2.2729913E+01 -2.2690797E+01
 -2.2651759E+01 -2.2612799E+01 -2.2573918E+01 -2.2535114E+01
 -2.2496388E+01 -2.2457740E+01 -2.2419170E+01 -2.2380677E+01
 -2.2342260E+01 -2.2303921E+01 -2.2265658E+01 -2.2227472E+01
 -2.2189363E+01 -2.2151329E+01 -2.2113372E+01 -2.2075490E+01
 -2.2037684E+01 -2.1999954E+01 -2.1962299E+01 -2.1924719E+01
 -2.1887214E+01 -2.1849784E+01 -2.1812429E+01 -2.1775148E+01
 -2.1737941E+01 -2.1700809E+01 -2.1663750E+01 -2.1626766E+01
 -2.1589855E+01 -2.1553017E+01 -2.1516253E+01 -2.1479562E+01
 -2.1442944E+01 -2.1406399E+01 -2.1369926E+01 -2.1333526E+01
 -2.1297198E+01 -2.1260942E+01 -2.1224759E+01 -2.1188647E+01
 -2.1152607E+01 -2.1116638E+01 -2.1080740E+01 -2.1044914E+01
 -2.1009159E+01 -2.0973475E+01 -2.0937861E+01 -2.0902318E+01
 -2.0866845E+01 -2.0831443E+01 -2.0796110E+01 -2.0760848E+01
 -2.0725655E+01 -2.0690532E+01 -2.0655478E+01 -2.0620493E+01
 -2.0585578E+01 -2.0550731E+01 -2.0515954E+01 -2.0481244E+01
 -2.0446604E+01 -2.0412032E+01 -2.0377528E+01 -2.0343092E+01
 -2.0308723E+01 -2.0274423E+01 -2.0240190E+01 -2.0206025E+01
 -2.0171926E+01 -2.0137895E+01 -2.0103931E+01 -2.0070034E+01
 -2.0036203E+01 -2.0002439E+01 -1.9968741E+01 -1.9935110E+01
 -1.9901544E+01 -1.9868045E+01 -1.9834611E+01 -1.9801243E+01
 -1.9767940E+01 -1.9734703E+01 -1.9701530E+01 -1.9668423E+01
 -1.9635381E+01 -1.9602403E+01 -1.9569491E+01 -1.9536642E+01
 -1.9503858E+01 -1.9471138E+01 -1.9438482E+01 -1.9405890E+01
 -1.9373361E+01 -1.9340897E+01 -1.9308495E+01 -1.9276157E+01
 -1.9243882E+01 -1.9211671E+01 -1.9179522E+01 -1.9147435E+01
 -1.9115412E+01 -1.9083451E+01 -1.9051552E+01 -1.9019715E+01
 -1.8987941E+01 -1.8956228E+01 -1.8924577E+01 -1.8892988E+01
 -1.8861460E+01 -1.8829994E+01 -1.8798589E+01 -1.8767245E+01
 -1.8735962E+01 -1.8704740E+01 -1.8673578E+01 -1.8642477E+01
 -1.8611436E+01 -1.8580456E+01 -1.8549536E+01 -1.8518676E+01
 -1.8487875E+01 -1.8457135E+01 -1.8426454E+01 -1.8395833E+01
 -1.8365270E+01 -1.8334768E+01 -1.8304324E+01 -1.8273939E+01
 -1.8243613E+01 -1.8213346E+01 -1.8183137E+01 -1.8152987E+01
 -1.8122895E+01 -1.8092861E+01 -1.8062885E+01 -1.8032967E+01
 -1.8003107E+01 -1.7973305E+01 -1.7943560E+01 -1.7913873E+01
 -1.7884243E+01 -1.7854670E+01 -1.7825154E+01 -1.7795695E+01
 -1.7766293E+01 -1.7736947E+01 -1.7707658E+01 -1.7678425E+01
 -1.7649249E+01 -1.7620129E+01 -1.7591065E+01 -1.7562057E+01
 -1.7533104E+01 -1.7504207E+01 -1.7475366E+01 -1.7446580E+01
 -1.7417850E+01 -1.7389175E+01 -1.7360555E+01 -1.7331989E+01
 -1.7303479E+01 -1.7275023E+01 -1.7246622E+01 -1.7218275E+01
 -1.7189983E+01 -1.7161745E+01 -1.7133560E+01 -1.7105430E+01
 -1.7077354E+01 -1.7049332E+01 -1.7021363E+01 -1.6993448E+01
 -1.6965586E+01 -1.6937777E+01 -1.6910022E+01 -1.6882319E+01
 -1.6854670E+01 -1.6827073E+01 -1.6799529E+01 -1.6772038E+01
 -1.6744599E+01 -1.6717212E+01 -1.6689878E+01 -1.6662596E+01
 -1.6635366E+01 -1.6608187E+01 -1.6581061E+01 -1.6553986E+01
 -1.6526963E+01 -1.6499991E+01 -1.6473071E+01 -1.6446201E+01
 -1.6419383E+01 -1.6392616E+01 -1.6365900E+01 -1.6339235E+01
 -1.6312620E+01 -1.6286056E+01 -1.6259542E+01 -1.6233079E+01
 -1.6206665E+01 -1.6180302E+01 -1.6153989E+01 -1.6127726E+01
 -1.6101513E+01 -1.6075349E+01 -1.6049235E+01 -1.6023171E+01
 -1.5997156E+01 -1.5971190E+01 -1.5945273E+01 -1.5919405E+01
 -1.5893587E+01 -1.5867817E+01 -1.5842096E+01 -1.5816423E+01
 -1.5790799E+01 -1.5765224E+01 -1.5739696E+01 -1.5714217E+01
 -1.5688786E+01 -1.5663403E+01 -1.5638068E+01 -1.5612781E+01
 -1.5587541E+01 -1.5562349E+01 -1.5537205E+01 -1.5512108E+01
 -1.5487058E+01 -1.5462055E+01 -1.5437100E+01 -1.5412191E+01
 -1.5387329E+01 -1.5362515E+01 -1.5337746E+01 -1.5313025E+01
 -1.5288349E+01 -1.5263721E+01 -1.5239138E+01 -1.5214602E+01
 -1.5190111E+01 -1.5165667E+01 -1.5141269E+01 -1.5116916E+01
 -1.5092609E+01 -1.5068348E+01 -1.5044132E+01 -1.5019961E+01
 -1.4995836E+01 -1.4971756E+01 -1.4947721E+01 -1.4923731E+01
 -1.4899786E+01 -1.4875886E+01 -1.4852030E+01 -1.4828220E+01
 -1.4804453E+01 -1.4780731E+01 -1.4757054E+01 -1.4733420E+01
 -1.4709831E+01 -1.4686286E+01 -1.4662785E+01 -1.4639328E+01
 -1.4615914E+01 -1.4592544E+01 -1.4569218E+01 -1.4545935E+01
 -1.4522696E+01 -1.4499499E+01 -1.4476347E+01 -1.4453237E+01
 -1.4430170E+01 -1.4407146E+01 -1.4384165E+01 -1.4361227E+01
 -1.4338332E+01 -1.4315479E+01 -1.4292668E+01 -1.4269900E+01
 -1.4247174E+01 -1.4224491E+01 -1.4201849E+01 -1.4179250E+01
 -1.4156692E+01 -1.4134177E+01 -1.4111703E+01 -1.4089271E+01
 -1.4066880E+01 -1.4044531E+01 -1.4022223E+01 -1.3999957E+01
 -1.3977732E+01 -1.3955548E+01 -1.3933405E+01 -1.3911303E+01
 -1.3889242E+01 -1.3867222E+01 -1.3845243E+01 -1.3823304E+01
 -1.3801406E+01 -1.3779548E+01 -1.3757730E+01 -1.3735953E+01
 -1.3714216E+01 -1.3692519E+01 -1.3670862E+01 -1.3649246E+01
 -1.3627669E+01 -1.3606131E+01 -1.3584634E+01 -1.3563176E+01
 -1.3541758E+01 -1.3520379E+01 -1.3499039E+01 -1.3477739E+01
 -1.3456478E+01 -1.3435256E+01 -1.3414073E+01 -1.3392929E+01
 -1.3371824E+01 -1.3350758E+01 -1.3329730E+01 -1.3308741E+01
 -1.3287791E+01 -1.3266879E+01 -1.3246005E+01 -1.3225170E+01
 -1.3204373E+01 -1.3183614E+01 -1.3162893E+01 -1.3142211E+01
 -1.3121566E+01 -1.3100959E+01 -1.3080389E+01 -1.3059858E+01
 -1.3039364E+01 -1.3018907E+01 -1.2998488E+01 -1.2978106E+01
 -1.2957762E+01 -1.2937454E+01 -1.2917184E+01 -1.2896951E+01
 -1.2876755E+01 -1.2856595E+01 -1.2836473E+01 -1.2816387E+01
 -1.2796338E+01 -1.2776326E+01 -1.2756350E+01 -1.2736410E+01
 -1.2716507E+01 -1.2696640E+01 -1.2676809E+01 -1.2657014E+01
 -1.2637256E+01 -1.2617533E+01 -1.2597847E+01 -1.2578196E+01
 -1.2558581E+01 -1.2539001E+01 -1.2519457E+01 -1.2499949E+01
 -1.2480476E+01 -1.2461039E+01 -1.2441636E+01 -1.2422270E+01
 -1.2402938E+01 -1.2383641E+01 -1.2364379E+01 -1.2345153E+01
 -1.2325961E+01 -1.2306804E+01 -1.2287682E+01 -1.2268594E+01
 -1.2249541E+01 -1.2230522E+01 -1.2211538E+01 -1.2192588E+01
 -1.2173673E+01 -1.2154792E+01 -1.2135945E+01 -1.2117132E+01
 -1.2098353E+01 -1.2079608E+01 -1.2060897E+01 -1.2042219E+01
 -1.2023576E+01 -1.2004966E+01 -1.1986389E+01 -1.1967846E+01
 -1.1949337E+01 -1.1930861E+01 -1.1912419E+01 -1.1894009E+01
 -1.1875633E+01 -1.1857290E+01 -1.1838980E+01 -1.1820703E+01
 -1.1802458E+01 -1.1784247E+01 -1.1766069E+01 -1.1747923E+01
 -1.1729810E+01 -1.1711729E+01 -1.1693681E+01 -1.1675665E+01
 -1.1657682E+01 -1.1639731E+01 -1.1621812E+01 -1.1603925E+01
 -1.1586071E+01 -1.1568249E+01 -1.1550458E+01 -1.1532700E+01
 -1.1514973E+01 -1.1497278E+01 -1.1479615E+01 -1.1461983E+01
 -1.1444383E+01 -1.1426815E+01 -1.1409278E+01 -1.1391772E+01
 -1.1374298E+01 -1.1356855E+01 -1.1339443E+01 -1.1322062E+01
 -1.1304713E+01 -1.1287394E+01 -1.1270107E+01 -1.1252850E+01
 -1.1235624E+01 -1.1218429E+01 -1.1201264E+01 -1.1184130E+01
 -1.1167027E+01 -1.1149954E+01 -1.1132912E+01 -1.1115900E+01
 -1.1098918E+01 -1.1081967E+01 -1.1065046E+01 -1.1048155E+01
 -1.1031294E+01 -1.1014463E+01 -1.0997662E+01 -1.0980891E+01
 -1.0964149E+01 -1.0947438E+01 -1.0930756E+01 -1.0914104E+01
 -1.0897481E+01 -1.0880888E+01 -1.0864325E+01 -1.0847790E+01
 -1.0831286E+01 -1.0814810E+01 -1.0798364E+01 -1.0781947E+01
 -1.0765559E+01 -1.0749200E+01 -1.0732870E+01 -1.0716569E+01
 -1.0700297E+01 -1.0684053E+01 -1.0667839E+01 -1.0651653E+01
 -1.0635496E+01 -1.0619367E+01 -1.0603267E+01 -1.0587195E+01
 -1.0571152E+01 -1.0555137E+01 -1.0539151E+01 -1.0523192E+01
 -1.0507262E+01 -1.0491360E+01 -1.0475486E+01 -1.0459640E+01
 -1.0443822E+01 -1.0428032E+01 -1.0412270E+01 -1.0396535E+01
 -1.0380829E+01 -1.0365150E+01 -1.0349498E+01 -1.0333874E+01
 -1.0318278E+01 -1.0302709E+01 -1.0287168E+01 -1.0271654E+01
 -1.0256167E+01 -1.0240707E+01 -1.0225275E+01 -1.0209869E+01
 -1.0194491E+01 -1.0179140E+01 -1.0163816E+01 -1.0148518E+01
 -1.0133248E+01 -1.0118004E+01 -1.0102787E+01 -1.0087597E+01
 -1.0072433E+01 -1.0057296E+01 -1.0042186E+01 -1.0027102E+01
 -1.0012044E+01 -9.9970130E+00 -9.9820081E+00 -9.9670295E+00
 -9.9520771E+00 -9.9371508E+00 -9.9222507E+00 -9.9073766E+00
 -9.8925285E+00 -9.8777064E+00 -9.8629102E+00 -9.8481398E+00
 -9.8333953E+00 -9.8186765E+00 -9.8039834E+00 -9.7893159E+00
 -9.7746740E+00 -9.7600577E+00 -9.7454668E+00 -9.7309014E+00
 -9.7163614E+00 -9.7018468E+00 -9.6873574E+00 -9.6728933E+00
 -9.6584543E+00 -9.6440405E+00 -9.6296518E+00 -9.6152881E+00
 -9.6009494E+00 -9.5866357E+00 -9.5723468E+00 -9.5580828E+00
 -9.5438436E+00 -9.5296291E+00 -9.5154393E+00 -9.5012741E+00
 -9.4871336E+00 -9.4730176E+00 -9.4589261E+00 -9.4448590E+00
 -9.4308164E+00 -9.4167981E+00 -9.4028041E+00 -9.3888343E+00
 -9.3748888E+00 -9.3609674E+00 -9.3470701E+00 -9.3331969E+00
 -9.3193477E+00 -9.3055225E+00 -9.2917212E+00 -9.2779438E+00
 -9.2641902E+00 -9.2504604E+00 -9.2367543E+00 -9.2230720E+00
 -9.2094132E+00 -9.1957781E+00 -9.1821664E+00 -9.1685783E+00
 -9.1550137E+00 -9.1414724E+00 -9.1279545E+00 -9.1144600E+00
 -9.1009887E+00 -9.0875406E+00 -9.0741157E+00 -9.0607139E+00
 -9.0473352E+00 -9.0339796E+00 -9.0206470E+00 -9.0073373E+00
 -8.9940505E+00 -8.9807865E+00 -8.9675454E+00 -8.9543271E+00
 -8.9411315E+00 -8.9279585E+00 -8.9148082E+00 -8.9016805E+00
 -8.8885754E+00 -8.8754927E+00 -8.8624325E+00 -8.8493947E+00
 -8.8363793E+00 -8.8233863E+00 -8.8104155E+00 -8.7974669E+00
 -8.7845405E+00 -8.7716363E+00 -8.7587542E+00 -8.7458942E+00
 -8.7330562E+00 -8.7202402E+00 -8.7074461E+00 -8.6946739E+00
 -8.6819235E+00 -8.6691950E+00 -8.6564882E+00 -8.6438032E+00
 -8.6311398E+00 -8.6184981E+00 -8.6058780E+00 -8.5932794E+00
 -8.5807023E+00 -8.5681467E+00 -8.5556126E+00 -8.5430998E+00
 -8.5306084E+00 -8.5181382E+00 -8.5056894E+00 -8.4932617E+00
 -8.4808553E+00 -8.4684699E+00 -8.4561057E+00 -8.4437625E+00
 -8.4314404E+00 -8.4191392E+00 -8.4068589E+00 -8.3945996E+00
 -8.3823610E+00 -8.3701433E+00 -8.3579464E+00 -8.3457702E+00
 -8.3336147E+00 -8.3214799E+00 -8.3093656E+00 -8.2972719E+00
 -8.2851988E+00 -8.2731461E+00 -8.2611139E+00 -8.2491021E+00
 -8.2371107E+00 -8.2251396E+00 -8.2131888E+00 -8.2012583E+00
 -8.1893479E+00 -8.1774578E+00 -8.1655877E+00 -8.1537378E+00
 -8.1419080E+00 -8.1300981E+00 -8.1183082E+00 -8.1065383E+00
 -8.0947883E+00 -8.0830581E+00 -8.0713478E+00 -8.0596573E+00
 -8.0479865E+00 -8.0363354E+00 -8.0247040E+00 -8.0130922E+00
 -8.0015000E+00 -7.9899274E+00 -7.9783743E+00 -7.9668407E+00
 -7.9553265E+00 -7.9438318E+00 -7.9323564E+00 -7.9209004E+00
 -7.9094636E+00 -7.8980461E+00 -7.8866479E+00 -7.8752688E+00
 -7.8639089E+00 -7.8525681E+00 -7.8412463E+00 -7.8299436E+00
 -7.8186600E+00 -7.8073952E+00 -7.7961494E+00 -7.7849225E+00
 -7.7737145E+00 -7.7625253E+00 -7.7513548E+00 -7.7402031E+00
 -7.7290702E+00 -7.7179559E+00 -7.7068602E+00 -7.6957831E+00
 -7.6847247E+00 -7.6736847E+00 -7.6626633E+00 -7.6516603E+00
 -7.6406757E+00 -7.6297096E+00 -7.6187618E+00 -7.6078323E+00
 -7.5969211E+00 -7.5860281E+00 -7.5751534E+00 -7.5642969E+00
 -7.5534585E+00 -7.5426382E+00 -7.5318360E+00 -7.5210518E+00
 -7.5102857E+00 -7.4995375E+00 -7.4888073E+00 -7.4780950E+00
 -7.4674005E+00 -7.4567239E+00 -7.4460651E+00 -7.4354241E+00
 -7.4248008E+00 -7.4141952E+00 -7.4036073E+00 -7.3930370E+00
 -7.3824843E+00 -7.3719492E+00 -7.3614316E+00 -7.3509315E+00
 -7.3404489E+00 -7.3299837E+00 -7.3195359E+00 -7.3091055E+00
 -7.2986925E+00 -7.2882967E+00 -7.2779182E+00 -7.2675570E+00
 -7.2572129E+00 -7.2468860E+00 -7.2365763E+00 -7.2262837E+00
 -7.2160081E+00 -7.2057496E+00 -7.1955081E+00 -7.1852836E+00
 -7.1750760E+00 -7.1648854E+00 -7.1547116E+00 -7.1445547E+00
 -7.1344145E+00 -7.1242912E+00 -7.1141846E+00 -7.1040948E+00
 -7.0940216E+00 -7.0839651E+00 -7.0739253E+00 -7.0639020E+00
 -7.0538953E+00 -7.0439051E+00 -7.0339315E+00 -7.0239743E+00
 -7.0140335E+00 -7.0041092E+00 -6.9942012E+00 -6.9843096E+00
 -6.9744343E+00 -6.9645752E+00 -6.9547325E+00 -6.9449059E+00
 -6.9350956E+00 -6.9253014E+00 -6.9155234E+00 -6.9057614E+00
 -6.8960156E+00 -6.8862857E+00 -6.8765719E+00 -6.8668741E+00
 -6.8571922E+00 -6.8475263E+00 -6.8378762E+00 -6.8282420E+00
 -6.8186236E+00 -6.8090211E+00 -6.7994343E+00 -6.7898632E+00
 -6.7803079E+00 -6.7707682E+00 -6.7612442E+00 -6.7517359E+00
 -6.7422431E+00 -6.7327659E+00 -6.7233042E+00 -6.7138581E+00
 -6.7044274E+00 -6.6950122E+00 -6.6856124E+00 -6.6762279E+00
 -6.6668589E+00 -6.6575052E+00 -6.6481668E+00 -6.6388437E+00
 -6.6295358E+00 -6.6202431E+00 -6.6109657E+00 -6.6017034E+00
 -6.5924562E+00 -6.5832241E+00 -6.5740072E+00 -6.5648053E+00
 -6.5556184E+00 -6.5464465E+00 -6.5372895E+00 -6.5281475E+00
 -6.5190204E+00 -6.5099082E+00 -6.5008109E+00 -6.4917284E+00
 -6.4826607E+00 -6.4736077E+00 -6.4645695E+00 -6.4555461E+00
 -6.4465373E+00 -6.4375432E+00 -6.4285637E+00 -6.4195988E+00
 -6.4106485E+00 -6.4017128E+00 -6.3927915E+00 -6.3838848E+00
 -6.3749926E+00 -6.3661148E+00 -6.3572514E+00 -6.3484025E+00
 -6.3395679E+00 -6.3307476E+00 -6.3219416E+00 -6.3131500E+00
 -6.3043726E+00 -6.2956094E+00 -6.2868604E+00 -6.2781257E+00
 -6.2694050E+00 -6.2606985E+00 -6.2520061E+00 -6.2433278E+00
 -6.2346636E+00 -6.2260133E+00 -6.2173771E+00 -6.2087548E+00
 -6.2001465E+00 -6.1915521E+00 -6.1829716E+00 -6.1744049E+00
 -6.1658521E+00 -6.1573132E+00 -6.1487880E+00 -6.1402766E+00
 -6.1317789E+00 -6.1232949E+00 -6.1148247E+00 -6.1063681E+00
 -6.0979251E+00 -6.0894958E+00 -6.0810800E+00 -6.0726779E+00
 -6.0642892E+00 -6.0559141E+00 -6.0475525E+00 -6.0392043E+00
 -6.0308696E+00 -6.0225483E+00 -6.0142403E+00 -6.0059458E+00
 -5.9976646E+00 -5.9893967E+00 -5.9811421E+00 -5.9729008E+00
 -5.9646727E+00 -5.9564578E+00 -5.9482562E+00 -5.9400677E+00
 -5.9318923E+00 -5.9237301E+00 -5.9155810E+00 -5.9074450E+00
 -5.8993220E+00 -5.8912120E+00 -5.8831151E+00 -5.8750311E+00
 -5.8669601E+00 -5.8589020E+00 -5.8508568E+00 -5.8428245E+00
 -5.8348051E+00 -5.8267985E+00 -5.8188047E+00 -5.8108237E+00
 -5.8028555E+00 -5.7949000E+00 -5.7869573E+00 -5.7790272E+00
 -5.7711098E+00 -5.7632051E+00 -5.7553130E+00 -5.7474335E+00
 -5.7395666E+00 -5.7317123E+00 -5.7238705E+00 -5.7160412E+00
 -5.7082244E+00 -5.7004200E+00 -5.6926281E+00 -5.6848486E+00
 -5.6770816E+00 -5.6693269E+00 -5.6615846E+00 -5.6538545E+00
 -5.6461369E+00 -5.6384314E+00 -5.6307383E+00 -5.6230574E+00
 -5.6153887E+00 -5.6077323E+00 -5.6000880E+00 -5.5924558E+00
 -5.5848358E+00 -5.5772279E+00 -5.5696321E+00 -5.5620483E+00
 -5.5544766E+00 -5.5469169E+00 -5.5393693E+00 -5.5318336E+00
 -5.5243098E+00 -5.5167980E+00 -5.5092981E+00 -5.5018101E+00
 -5.4943340E+00 -5.4868697E+00 -5.4794172E+00 -5.4719766E+00
 -5.4645477E+00 -5.4571306E+00 -5.4497253E+00 -5.4423317E+00
 -5.4349497E+00 -5.4275795E+00 -5.4202209E+00 -5.4128739E+00
 -5.4055386E+00 -5.3982148E+00 -5.3909026E+00 -5.3836020E+00
 -5.3763129E+00 -5.3690353E+00 -5.3617693E+00 -5.3545146E+00
 -5.3472715E+00 -5.3400397E+00 -5.3328194E+00 -5.3256104E+00
 -5.3184129E+00 -5.3112266E+00 -5.3040517E+00 -5.2968881E+00
 -5.2897358E+00 -5.2825947E+00 -5.2754649E+00 -5.2683463E+00
 -5.2612390E+00 -5.2541428E+00 -5.2470577E+00 -5.2399839E+00
 -5.2329211E+00 -5.2258694E+00 -5.2188288E+00 -5.2117993E+00
 -5.2047809E+00 -5.1977734E+00 -5.1907770E+00 -5.1837915E+00
 -5.1768170E+00 -5.1698535E+00 -5.1629009E+00 -5.1559591E+00
 -5.1490283E+00 -5.1421084E+00 -5.1351992E+00 -5.1283010E+00
 -5.1214135E+00 -5.1145368E+00 -5.1076709E+00 -5.1008157E+00
 -5.0939713E+00 -5.0871376E+00 -5.0803145E+00 -5.0735022E+00
 -5.0667005E+00 -5.0599094E+00 -5.0531290E+00 -5.0463591E+00
 -5.0395998E+00 -5.0328511E+00 -5.0261130E+00 -5.0193853E+00
 -5.0126682E+00 -5.0059615E+00 -4.9992653E+00 -4.9925796E+00
 -4.9859043E+00 -4.9792394E+00 -4.9725849E+00 -4.9659407E+00
 -4.9593069E+00 -4.9526835E+00 -4.9460704E+00 -4.9394675E+00
 -4.9328750E+00 -4.9262927E+00 -4.9197207E+00 -4.9131588E+00
 -4.9066072E+00 -4.9000658E+00 -4.8935346E+00 -4.8870135E+00
 -4.8805025E+00 -4.8740017E+00 -4.8675110E+00 -4.8610303E+00
 -4.8545597E+00 -4.8480992E+00 -4.8416487E+00 -4.8352082E+00
 -4.8287777E+00 -4.8223571E+00 -4.8159465E+00 -4.8095459E+00
 -4.8031552E+00 -4.7967744E+00 -4.7904035E+00 -4.7840424E+00
 -4.7776912E+00 -4.7713498E+00 -4.7650183E+00 -4.7586965E+00
 -4.7523846E+00 -4.7460824E+00 -4.7397899E+00 -4.7335072E+00
 -4.7272342E+00 -4.7209709E+00 -4.7147173E+00 -4.7084733E+00
 -4.7022390E+00 -4.6960143E+00 -4.6897992E+00 -4.6835937E+00
 -4.6773978E+00 -4.6712114E+00 -4.6650346E+00 -4.6588673E+00
 -4.6527096E+00 -4.6465613E+00 -4.6404225E+00 -4.6342932E+00
 -4.6281733E+00 -4.6220628E+00 -4.6159617E+00 -4.6098701E+00
 -4.6037878E+00 -4.5977148E+00 -4.5916513E+00 -4.5855970E+00
 -4.5795520E+00 -4.5735164E+00 -4.5674900E+00 -4.5614729E+00
 -4.5554650E+00 -4.5494664E+00 -4.5434770E+00 -4.5374968E+00
 -4.5315257E+00 -4.5255638E+00 -4.5196111E+00 -4.5136675E+00
 -4.5077330E+00 -4.5018076E+00 -4.4958914E+00 -4.4899841E+00
 -4.4840860E+00 -4.4781968E+00 -4.4723167E+00 -4.4664456E+00
 -4.4605835E+00 -4.4547303E+00 -4.4488862E+00 -4.4430509E+00
 -4.4372246E+00 -4.4314072E+00 -4.4255987E+00 -4.4197991E+00
 -4.4140083E+00 -4.4082264E+00 -4.4024533E+00 -4.3966891E+00
 -4.3909336E+00 -4.3851869E+00 -4.3794490E+00 -4.3737199E+00
 -4.3679995E+00 -4.3622878E+00 -4.3565849E+00 -4.3508906E+00
 -4.3452050E+00 -4.3395281E+00 -4.3338599E+00 -4.3282002E+00
 -4.3225492E+00 -4.3169068E+00 -4.3112730E+00 -4.3056478E+00
 -4.3000311E+00 -4.2944230E+00 -4.2888234E+00 -4.2832323E+00
 -4.2776497E+00 -4.2720756E+00 -4.2665100E+00 -4.2609529E+00
 -4.2554042E+00 -4.2498639E+00 -4.2443320E+00 -4.2388085E+00
 -4.2332934E+00 -4.2277867E+00 -4.2222883E+00 -4.2167983E+00
 -4.2113166E+00 -4.2058432E+00 -4.2003781E+00 -4.1949213E+00
 -4.1894728E+00 -4.1840325E+00 -4.1786004E+00 -4.1731766E+00
 -4.1677610E+00 -4.1623536E+00 -4.1569544E+00 -4.1515633E+00
 -4.1461804E+00 -4.1408057E+00 -4.1354390E+00 -4.1300805E+00
 -4.1247301E+00 -4.1193878E+00 -4.1140535E+00 -4.1087273E+00
 -4.1034091E+00 -4.0980990E+00 -4.0927969E+00 -4.0875027E+00
 -4.0822166E+00 -4.0769384E+00 -4.0716682E+00 -4.0664060E+00
 -4.0611517E+00 -4.0559053E+00 -4.0506668E+00 -4.0454362E+00
 -4.0402135E+00 -4.0349986E+00 -4.0297916E+00 -4.0245924E+00
 -4.0194011E+00 -4.0142175E+00 -4.0090418E+00 -4.0038738E+00
 -3.9987136E+00 -3.9935612E+00 -3.9884165E+00 -3.9832796E+00
 -3.9781503E+00 -3.9730288E+00 -3.9679150E+00 -3.9628088E+00
 -3.9577103E+00 -3.9526195E+00 -3.9475363E+00 -3.9424607E+00
 -3.9373927E+00 -3.9323323E+00 -3.9272795E+00 -3.9222343E+00
 -3.9171967E+00 -3.9121666E+00 -3.9071440E+00 -3.9021289E+00
 -3.8971214E+00 -3.8921213E+00 -3.8871288E+00 -3.8821437E+00
 -3.8771660E+00 -3.8721959E+00 -3.8672331E+00 -3.8622777E+00
 -3.8573298E+00 -3.8523893E+00 -3.8474561E+00 -3.8425303E+00
 -3.8376119E+00 -3.8327008E+00 -3.8277970E+00 -3.8229006E+00
 -3.8180114E+00 -3.8131296E+00 -3.8082550E+00 -3.8033877E+00
 -3.7985277E+00 -3.7936749E+00 -3.7888293E+00 -3.7839910E+00
 -3.7791598E+00 -3.7743359E+00 -3.7695191E+00 -3.7647095E+00
 -3.7599071E+00 -3.7551118E+00 -3.7503236E+00 -3.7455426E+00
 -3.7407687E+00 -3.7360019E+00 -3.7312421E+00 -3.7264894E+00
 -3.7217438E+00 -3.7170053E+00 -3.7122738E+00 -3.7075493E+00
 -3.7028318E+00 -3.6981213E+00 -3.6934178E+00 -3.6887213E+00
 -3.6840317E+00 -3.6793491E+00 -3.6746735E+00 -3.6700048E+00
 -3.6653430E+00 -3.6606881E+00 -3.6560401E+00 -3.6513990E+00
 -3.6467647E+00 -3.6421373E+00 -3.6375168E+00 -3.6329031E+00
 -3.6282962E+00 -3.6236962E+00 -3.6191029E+00 -3.6145164E+00
 -3.6099368E+00 -3.6053638E+00 -3.6007977E+00 -3.5962383E+00
 -3.5916856E+00 -3.5871396E+00 -3.5826004E+00 -3.5780678E+00
 -3.5735420E+00 -3.5690228E+00 -3.5645103E+00 -3.5600044E+00
 -3.5555052E+00 -3.5510126E+00 -3.5465267E+00 -3.5420473E+00
 -3.5375746E+00 -3.5331084E+00 -3.5286488E+00 -3.5241958E+00
 -3.5197493E+00 -3.5153094E+00 -3.5108760E+00 -3.5064491E+00
 -3.5020288E+00 -3.4976149E+00 -3.4932076E+00 -3.4888067E+00
 -3.4844122E+00 -3.4800243E+00 -3.4756428E+00 -3.4712677E+00
 -3.4668990E+00 -3.4625368E+00 -3.4581809E+00 -3.4538314E+00
 -3.4494884E+00 -3.4451517E+00 -3.4408213E+00 -3.4364973E+00
 -3.4321797E+00 -3.4278683E+00 -3.4235633E+00 -3.4192646E+00
 -3.4149722E+00 -3.4106861E+00 -3.4064062E+00 -3.4021326E+00
 -3.3978653E+00 -3.3936042E+00 -3.3893493E+00 -3.3851007E+00
 -3.3808583E+00 -3.3766221E+00 -3.3723920E+00 -3.3681682E+00
 -3.3639505E+00 -3.3597390E+00 -3.3555336E+00 -3.3513344E+00
 -3.3471413E+00 -3.3429543E+00 -3.3387734E+00 -3.3345987E+00
 -3.3304300E+00 -3.3262674E+00 -3.3221109E+00 -3.3179604E+00
 -3.3138160E+00 -3.3096776E+00 -3.3055452E+00 -3.3014189E+00
 -3.2972985E+00 -3.2931842E+00 -3.2890758E+00 -3.2849735E+00
 -3.2808771E+00 -3.2767866E+00 -3.2727021E+00 -3.2686236E+00
 -3.2645509E+00 -3.2604842E+00 -3.2564234E+00 -3.2523685E+00
 -3.2483195E+00 -3.2442764E+00 -3.2402391E+00 -3.2362077E+00
 -3.2321822E+00 -3.2281625E+00 -3.2241486E+00 -3.2201405E+00
 -3.2161383E+00 -3.2121418E+00 -3.2081512E+00 -3.2041663E+00
 -3.2001872E+00 -3.1962139E+00 -3.1922463E+00 -3.1882845E+00
 -3.1843284E+00 -3.1803780E+00 -3.1764334E+00 -3.1724944E+00
 -3.1685612E+00 -3.1646336E+00 -3.1607117E+00 -3.1567955E+00
 -3.1528850E+00 -3.1489801E+00 -3.1450808E+00 -3.1411872E+00
 -3.1372991E+00 -3.1334168E+00 -3.1295400E+00 -3.1256688E+00
 -3.1218032E+00 -3.1179431E+00 -3.1140887E+00 -3.1102397E+00
 -3.1063964E+00 -3.1025586E+00 -3.0987263E+00 -3.0948995E+00
 -3.0910782E+00 -3.0872625E+00 -3.0834522E+00 -3.0796475E+00
 -3.0758482E+00 -3.0720543E+00 -3.0682660E+00 -3.0644830E+00
 -3.0607056E+00 -3.0569335E+00 -3.0531669E+00 -3.0494057E+00
 -3.0456499E+00 -3.0418994E+00 -3.0381544E+00 -3.0344148E+00
 -3.0306805E+00 -3.0269516E+00 -3.0232280E+00 -3.0195098E+00
 -3.0157969E+00 -3.0120893E+00 -3.0083871E+00 -3.0046901E+00
 -3.0009985E+00 -2.9973121E+00 -2.9936310E+00 -2.9899553E+00
 -2.9862847E+00 -2.9826194E+00 -2.9789594E+00 -2.9753046E+00
 -2.9716551E+00 -2.9680107E+00 -2.9643716E+00 -2.9607377E+00
 -2.9571089E+00 -2.9534854E+00 -2.9498671E+00 -2.9462539E+00
 -2.9426458E+00 -2.9390430E+00 -2.9354452E+00 -2.9318527E+00
 -2.9282652E+00 -2.9246829E+00 -2.9211056E+00 -2.9175335E+00
 -2.9139665E+00 -2.9104045E+00 -2.9068477E+00 -2.9032959E+00
 -2.8997491E+00 -2.8962075E+00 -2.8926708E+00 -2.8891392E+00
 -2.8856127E+00 -2.8820911E+00 -2.8785746E+00 -2.8750631E+00
 -2.8715565E+00 -2.8680550E+00 -2.8645584E+00 -2.8610668E+00
 -2.8575802E+00 -2.8540985E+00 -2.8506218E+00 -2.8471500E+00
 -2.8436832E+00 -2.8402213E+00 -2.8367643E+00 -2.8333122E+00
 -2.8298650E+00 -2.8264226E+00 -2.8229852E+00 -2.8195527E+00
 -2.8161250E+00 -2.8127022E+00 -2.8092842E+00 -2.8058711E+00
 -2.8024628E+00 -2.7990593E+00 -2.7956607E+00 -2.7922669E+00
 -2.7888779E+00 -2.7854937E+00 -2.7821142E+00 -2.7787396E+00
 -2.7753697E+00 -2.7720046E+00 -2.7686443E+00 -2.7652887E+00
 -2.7619378E+00 -2.7585917E+00 -2.7552503E+00 -2.7519137E+00
 -2.7485817E+00 -2.7452545E+00 -2.7419319E+00 -2.7386141E+00
 -2.7353009E+00 -2.7319924E+00 -2.7286886E+00 -2.7253894E+00
 -2.7220949E+00 -2.7188050E+00 -2.7155198E+00 -2.7122392E+00
 -2.7089632E+00 -2.7056918E+00 -2.7024251E+00 -2.6991629E+00
 -2.6959053E+00 -2.6926524E+00 -2.6894040E+00 -2.6861601E+00
 -2.6829209E+00 -2.6796862E+00 -2.6764560E+00 -2.6732304E+00
 -2.6700093E+00 -2.6667928E+00 -2.6635807E+00 -2.6603732E+00
 -2.6571702E+00 -2.6539717E+00 -2.6507776E+00 -2.6475881E+00
 -2.6444030E+00 -2.6412224E+00 -2.6380463E+00 -2.6348746E+00
 -2.6317074E+00 -2.6285446E+00 -2.6253862E+00 -2.6222323E+00
 -2.6190828E+00 -2.6159377E+00 -2.6127970E+00 -2.6096607E+00
 -2.6065288E+00 -2.6034013E+00 -2.6002781E+00 -2.5971593E+00
  4.3993689E+08  8.7093640E+08  1.2931347E+09  1.7066661E+09
  2.1116632E+09  2.5082566E+09  2.8965753E+09  3.2767464E+09
  3.6488955E+09  4.0131462E+09  4.3696206E+09  4.7184391E+09
  5.0597205E+09  5.3935819E+09  5.7201388E+09  6.0395052E+09
  6.3517934E+09  6.6571143E+09  6.9555772E+09  7.2472899E+09
  7.5323588E+09  7.8108888E+09  8.0829832E+09  8.3487440E+09
  8.6082720E+09  8.8616662E+09  9.1090244E+09  9.3504433E+09
  9.5860179E+09  9.8158419E+09  1.0040008E+10  1.0258607E+10
  1.0471730E+10  1.0679465E+10  1.0881899E+10  1.1079118E+10
  1.1271209E+10  1.1458254E+10  1.1640336E+10  1.1817537E+10
  1.1989937E+10  1.2157615E+10  1.2320650E+10  1.2479118E+10
  1.2633096E+10  1.2782659E+10  1.2927879E+10  1.3068831E+10
  1.3205585E+10  1.3338212E+10  1.3466783E+10  1.3591366E+10
  1.3712028E+10  1.3828837E+10  1.3941858E+10  1.4051156E+10
  1.4156795E+10  1.4258838E+10  1.4357348E+10  1.4452386E+10
  1.4544011E+10  1.4632284E+10  1.4717262E+10  1.4799005E+10
  1.4877569E+10  1.4953010E+10  1.5025383E+10  1.5094743E+10
  1.5161144E+10  1.5224639E+10  1.5285279E+10  1.5343116E+10
  1.5398202E+10  1.5450585E+10  1.5500316E+10  1.5547442E+10
  1.5592011E+10  1.5634071E+10  1.5673668E+10  1.5710847E+10
  1.5745654E+10  1.5778132E+10  1.5808327E+10  1.5836280E+10
  1.5862034E+10  1.5885631E+10  1.5907112E+10  1.5926517E+10
  1.5943887E+10  1.5959261E+10  1.5972678E+10  1.5984175E+10
  1.5993791E+10  1.6001562E+10  1.6007526E+10  1.6011717E+10
  1.6014171E+10  1.6014924E+10  1.6014009E+10  1.6011460E+10
  1.6007311E+10  1.6001594E+10  1.5994341E+10  1.5985585E+10
  1.5975357E+10  1.5963687E+10  1.5950606E+10  1.5936143E+10
  1.5920329E+10  1.5903191E+10  1.5884759E+10  1.5865061E+10
  1.5844124E+10  1.5821976E+10  1.5798642E+10  1.5774151E+10
  1.5748526E+10  1.5721795E+10  1.5693982E+10  1.5665112E+10
  1.5635209E+10  1.5604298E+10  1.5572401E+10  1.5539542E+10
  1.5505744E+10  1.5471029E+10  1.5435420E+10  1.5398938E+10
  1.5361604E+10  1.5323440E+10  1.5284466E+10  1.5244704E+10
  1.5204172E+10  1.5162890E+10  1.5120878E+10  1.5078156E+10
  1.5034741E+10  1.4990653E+10  1.4945908E+10  1.4900527E+10
  1.4854525E+10  1.4807920E+10  1.4760729E+10  1.4712970E+10
  1.4664657E+10  1.4615808E+10  1.4566439E+10  1.4516564E+10
  1.4466199E+10  1.4415360E+10  1.4364062E+10  1.4312318E+10
  1.4260143E+10  1.4207551E+10  1.4154557E+10  1.4101173E+10
  1.4047413E+10  1.3993291E+10  1.3938819E+10  1.3884009E+10
  1.3828875E+10  1.3773428E+10  1.3717681E+10  1.3661646E+10
  1.3605333E+10  1.3548755E+10  1.3491923E+10  1.3434847E+10
  1.3377538E+10  1.3320008E+10  1.3262266E+10  1.3204323E+10
  1.3146189E+10  1.3087873E+10  1.3029386E+10  1.2970736E+10
  1.2911934E+10  1.2852988E+10  1.2793907E+10  1.2734701E+10
  1.2675377E+10  1.2615944E+10  1.2556411E+10  1.2496786E+10
  1.2437076E+10  1.2377290E+10  1.2317436E+10  1.2257520E+10
  1.2197551E+10  1.2137535E+10  1.2077480E+10  1.2017393E+10
  1.1957280E+10  1.1897149E+10  1.1837005E+10  1.1776856E+10
  1.1716707E+10  1.1656566E+10  1.1596437E+10  1.1536327E+10
  1.1476241E+10  1.1416187E+10  1.1356168E+10  1.1296190E+10
  1.1236259E+10  1.1176380E+10  1.1116559E+10  1.1056799E+10
  1.0997107E+10  1.0937486E+10  1.0877942E+10  1.0818479E+10
  1.0759102E+10  1.0699815E+10  1.0640622E+10  1.0581527E+10
  1.0522536E+10  1.0463651E+10  1.0404876E+10  1.0346216E+10
  1.0287675E+10  1.0229255E+10  1.0170960E+10  1.0112794E+10
  1.0054760E+10  9.9968624E+09  9.9391032E+09  9.8814859E+09
  9.8240136E+09  9.7666894E+09  9.7095161E+09  9.6524966E+09
  9.5956337E+09  9.5389300E+09  9.4823883E+09  9.4260110E+09
  9.3698006E+09  9.3137597E+09  9.2578904E+09  9.2021953E+09
  9.1466763E+09  9.0913358E+09  9.0361759E+09  8.9811985E+09
  8.9264056E+09  8.8717993E+09  8.8173812E+09  8.7631534E+09
  8.7091174E+09  8.6552750E+09  8.6016279E+09  8.5481776E+09
  8.4949257E+09  8.4418736E+09  8.3890228E+09  8.3363747E+09
  8.2839306E+09  8.2316918E+09  8.1796595E+09  8.1278349E+09
  8.0762192E+09  8.0248135E+09  7.9736189E+09  7.9226363E+09
  7.8718667E+09  7.8213111E+09  7.7709703E+09  7.7208453E+09
  7.6709367E+09  7.6212455E+09  7.5717723E+09  7.5225178E+09
  7.4734827E+09  7.4246676E+09  7.3760731E+09  7.3276998E+09
  7.2795481E+09  7.2316186E+09  7.1839117E+09  7.1364279E+09
  7.0891675E+09  7.0421309E+09  6.9953184E+09  6.9487303E+09
  6.9023669E+09  6.8562285E+09  6.8103152E+09  6.7646272E+09
  6.7191647E+09  6.6739279E+09  6.6289168E+09  6.5841315E+09
  6.5395721E+09  6.4952386E+09  6.4511310E+09  6.4072493E+09
  6.3635934E+09  6.3201634E+09  6.2769591E+09  6.2339803E+09
  6.1912271E+09  6.1486992E+09  6.1063965E+09  6.0643188E+09
  6.0224658E+09  5.9808374E+09  5.9394333E+09  5.8982533E+09
  5.8572970E+09  5.8165642E+09  5.7760546E+09  5.7357678E+09
  5.6957035E+09  5.6558613E+09  5.6162408E+09  5.5768417E+09
  5.5376635E+09  5.4987058E+09  5.4599682E+09  5.4214502E+09
  5.3831514E+09  5.3450713E+09  5.3072093E+09  5.2695651E+09
  5.2321380E+09  5.1949275E+09  5.1579332E+09  5.1211544E+09
  5.0845906E+09  5.0482412E+09  5.0121057E+09  4.9761834E+09
  4.9404737E+09  4.9049760E+09  4.8696898E+09  4.8346143E+09
  4.7997490E+09  4.7650931E+09  4.7306460E+09  4.6964071E+09
  4.6623757E+09  4.6285511E+09  4.5949325E+09  4.5615194E+09
  4.5283110E+09  4.4953066E+09  4.4625055E+09  4.4299069E+09
  4.3975101E+09  4.3653144E+09  4.3333190E+09  4.3015233E+09
  4.2699264E+09  4.2385275E+09  4.2073260E+09  4.1763211E+09
  4.1455119E+09  4.1148977E+09  4.0844777E+09  4.0542511E+09
  4.0242172E+09  3.9943751E+09  3.9647241E+09  3.9352633E+09
  3.9059919E+09  3.8769092E+09  3.8480143E+09  3.8193063E+09
  3.7907846E+09  3.7624482E+09  3.7342964E+09  3.7063282E+09
  3.6785430E+09  3.6509398E+09  3.6235179E+09  3.5962763E+09
  3.5692143E+09  3.5423310E+09  3.5156256E+09  3.4890972E+09
  3.4627450E+09  3.4365682E+09  3.4105659E+09  3.3847372E+09
  3.3590814E+09  3.3335976E+09  3.3082849E+09  3.2831424E+09
  3.2581694E+09  3.2333650E+09  3.2087284E+09  3.1842586E+09
  3.1599549E+09  3.1358163E+09  3.1118421E+09  3.0880314E+09
  3.0643834E+09  3.0408972E+09  3.0175719E+09  2.9944067E+09
  2.9714008E+09  2.9485533E+09  2.9258633E+09  2.9033301E+09
  2.8809528E+09  2.8587306E+09  2.8366625E+09  2.8147478E+09
  2.7929856E+09  2.7713751E+09  2.7499155E+09  2.7286058E+09
  2.7074454E+09  2.6864333E+09  2.6655687E+09  2.6448508E+09
  2.6242788E+09  2.6038518E+09  2.5835691E+09  2.5634297E+09
  2.5434329E+09  2.5235778E+09  2.5038637E+09  2.4842897E+09
  2.4648550E+09  2.4455588E+09  2.4264003E+09  2.4073787E+09
  2.3884932E+09  2.3697429E+09  2.3511271E+09  2.3326450E+09
  2.3142958E+09  2.2960787E+09  2.2779929E+09  2.2600376E+09
  2.2422120E+09  2.2245154E+09  2.2069470E+09  2.1895059E+09
  2.1721914E+09  2.1550028E+09  2.1379393E+09  2.1210000E+09
  2.1041843E+09  2.0874914E+09  2.0709205E+09  2.0544709E+09
  2.0381417E+09  2.0219323E+09  2.0058420E+09  1.9898698E+09
  1.9740152E+09  1.9582774E+09  1.9426557E+09  1.9271492E+09
  1.9117573E+09  1.8964793E+09  1.8813144E+09  1.8662619E+09
  1.8513211E+09  1.8364913E+09  1.8217717E+09  1.8071617E+09
  1.7926605E+09  1.7782674E+09  1.7639818E+09  1.7498030E+09
  1.7357301E+09  1.7217627E+09  1.7078998E+09  1.6941410E+09
  1.6804855E+09  1.6669326E+09  1.6534816E+09  1.6401319E+09
  1.6268828E+09  1.6137336E+09  1.6006837E+09  1.5877325E+09
  1.5748791E+09  1.5621231E+09  1.5494637E+09  1.5369004E+09
  1.5244324E+09  1.5120591E+09  1.4997798E+09  1.4875941E+09
  1.4755011E+09  1.4635003E+09  1.4515911E+09  1.4397729E+09
  1.4280449E+09  1.4164067E+09  1.4048575E+09  1.3933968E+09
  1.3820241E+09  1.3707385E+09  1.3595397E+09  1.3484269E+09
  1.3373996E+09  1.3264573E+09  1.3155992E+09  1.3048248E+09
  1.2941336E+09  1.2835250E+09  1.2729983E+09  1.2625531E+09
  1.2521887E+09  1.2419046E+09  1.2317003E+09  1.2215751E+09
  1.2115285E+09  1.2015600E+09  1.1916690E+09  1.1818549E+09
  1.1721173E+09  1.1624556E+09  1.1528692E+09  1.1433576E+09
  1.1339203E+09  1.1245567E+09  1.1152664E+09  1.1060488E+09
  1.0969034E+09  1.0878296E+09  1.0788270E+09  1.0698951E+09
  1.0610333E+09  1.0522411E+09  1.0435181E+09  1.0348637E+09
  1.0262775E+09  1.0177589E+09  1.0093075E+09  1.0009228E+09
  9.9260429E+08  9.8435149E+08  9.7616394E+08  9.6804115E+08
  9.5998267E+08  9.5198801E+08  9.4405672E+08  9.3618833E+08
  9.2838239E+08  9.2063843E+08  9.1295600E+08  9.0533466E+08
  8.9777395E+08  8.9027343E+08  8.8283265E+08  8.7545118E+08
  8.6812858E+08  8.6086441E+08  8.5365824E+08  8.4650964E+08
  8.3941820E+08  8.3238348E+08  8.2540506E+08  8.1848252E+08
  8.1161546E+08  8.0480345E+08  7.9804610E+08  7.9134298E+08
  7.8469369E+08  7.7809784E+08  7.7155503E+08  7.6506485E+08
  7.5862691E+08  7.5224083E+08  7.4590621E+08  7.3962266E+08
  7.3338980E+08  7.2720725E+08  7.2107464E+08  7.1499158E+08
  7.0895770E+08  7.0297263E+08  6.9703599E+08  6.9114744E+08
  6.8530659E+08  6.7951309E+08  6.7376657E+08  6.6806669E+08
  6.6241309E+08  6.5680541E+08  6.5124331E+08  6.4572643E+08
  6.4025444E+08  6.3482699E+08  6.2944374E+08  6.2410435E+08
  6.1880849E+08  6.1355582E+08  6.0834601E+08  6.0317874E+08
  5.9805368E+08  5.9297049E+08  5.8792887E+08  5.8292849E+08
  5.7796903E+08  5.7305018E+08  5.6817163E+08  5.6333305E+08
  5.5853416E+08  5.5377463E+08  5.4905416E+08  5.4437245E+08
  5.3972921E+08  5.3512412E+08  5.3055690E+08  5.2602726E+08
  5.2153489E+08  5.1707951E+08  5.1266083E+08  5.0827857E+08
  5.0393244E+08  4.9962217E+08  4.9534746E+08  4.9110804E+08
  4.8690364E+08  4.8273398E+08  4.7859879E+08  4.7449781E+08
  4.7043075E+08  4.6639736E+08  4.6239737E+08  4.5843053E+08
  4.5449656E+08  4.5059521E+08  4.4672622E+08  4.4288934E+08
  4.3908432E+08  4.3531090E+08  4.3156883E+08  4.2785787E+08
  4.2417778E+08  4.2052830E+08  4.1690919E+08  4.1332022E+08
  4.0976115E+08  4.0623173E+08  4.0273173E+08  3.9926093E+08
  3.9581908E+08  3.9240596E+08  3.8902134E+08  3.8566499E+08
  3.8233669E+08  3.7903621E+08  3.7576333E+08  3.7251783E+08
  3.6929950E+08  3.6610811E+08  3.6294346E+08  3.5980532E+08
  3.5669348E+08  3.5360774E+08  3.5054789E+08  3.4751371E+08
  3.4450500E+08  3.4152156E+08  3.3856318E+08  3.3562967E+08
  3.3272082E+08  3.2983644E+08  3.2697632E+08  3.2414027E+08
  3.2132811E+08  3.1853963E+08  3.1577464E+08  3.1303296E+08
  3.1031440E+08  3.0761877E+08  3.0494588E+08  3.0229555E+08
  2.9966760E+08  2.9706185E+08  2.9447812E+08  2.9191623E+08
  2.8937600E+08  2.8685725E+08  2.8435982E+08  2.8188352E+08
  2.7942820E+08  2.7699367E+08  2.7457976E+08  2.7218632E+08
  2.6981317E+08  2.6746015E+08  2.6512709E+08  2.6281383E+08
  2.6052021E+08  2.5824607E+08  2.5599125E+08  2.5375559E+08
  2.5153894E+08  2.4934114E+08  2.4716203E+08  2.4500147E+08
  2.4285930E+08  2.4073537E+08  2.3862952E+08  2.3654162E+08
  2.3447152E+08  2.3241906E+08  2.3038411E+08  2.2836652E+08
  2.2636615E+08  2.2438285E+08  2.2241649E+08  2.2046692E+08
  2.1853401E+08  2.1661762E+08  2.1471762E+08  2.1283387E+08
  2.1096622E+08  2.0911457E+08  2.0727876E+08  2.0545867E+08
  2.0365417E+08  2.0186513E+08  2.0009142E+08  1.9833292E+08
  1.9658950E+08  1.9486103E+08  1.9314739E+08  1.9144846E+08
  1.8976412E+08  1.8809424E+08  1.8643871E+08  1.8479740E+08
  1.8317020E+08  1.8155698E+08  1.7995765E+08  1.7837207E+08
  1.7680013E+08  1.7524173E+08  1.7369674E+08  1.7216506E+08
  1.7064657E+08  1.6914117E+08  1.6764875E+08  1.6616919E+08
  1.6470239E+08  1.6324825E+08  1.6180665E+08  1.6037749E+08
  1.5896068E+08  1.5755610E+08  1.5616365E+08  1.5478324E+08
  1.5341476E+08  1.5205810E+08  1.5071318E+08  1.4937990E+08
  1.4805814E+08  1.4674783E+08  1.4544886E+08  1.4416114E+08
  1.4288457E+08  1.4161907E+08  1.4036452E+08  1.3912086E+08
  1.3788797E+08  1.3666578E+08  1.3545419E+08  1.3425312E+08
  1.3306246E+08  1.3188215E+08  1.3071208E+08  1.2955218E+08
  1.2840235E+08  1.2726252E+08  1.2613259E+08  1.2501249E+08
  1.2390213E+08  1.2280143E+08  1.2171030E+08  1.2062867E+08
  1.1955646E+08  1.1849358E+08  1.1743996E+08  1.1639552E+08
  1.1536018E+08  1.1433387E+08  1.1331650E+08  1.1230800E+08
  1.1130830E+08  1.1031732E+08  1.0933499E+08  1.0836123E+08
  1.0739597E+08  1.0643914E+08  1.0549067E+08  1.0455049E+08
  1.0361852E+08  1.0269470E+08  1.0177895E+08  1.0087122E+08
  9.9971418E+07  9.9079492E+07  9.8195371E+07  9.7318988E+07
  9.6450277E+07  9.5589174E+07  9.4735613E+07  9.3889529E+07
  9.3050859E+07  9.2219540E+07  9.1395508E+07  9.0578702E+07
  8.9769060E+07  8.8966520E+07  8.8171021E+07  8.7382504E+07
  8.6600909E+07  8.5826176E+07  8.5058247E+07  8.4297063E+07
  8.3542567E+07  8.2794701E+07  8.2053409E+07  8.1318633E+07
  8.0590319E+07  7.9868410E+07  7.9152852E+07  7.8443590E+07
  7.7740570E+07  7.7043738E+07  7.6353042E+07  7.5668428E+07
  7.4989845E+07  7.4317240E+07  7.3650561E+07  7.2989759E+07
  7.2334782E+07  7.1685580E+07  7.1042103E+07  7.0404303E+07
  6.9772130E+07  6.9145535E+07  6.8524471E+07  6.7908890E+07
  6.7298744E+07  6.6693987E+07  6.6094571E+07  6.5500452E+07
  6.4911583E+07  6.4327919E+07  6.3749415E+07  6.3176026E+07
  6.2607709E+07  6.2044418E+07  6.1486111E+07  6.0932745E+07
  6.0384276E+07  5.9840663E+07  5.9301863E+07  5.8767835E+07
  5.8238537E+07  5.7713929E+07  5.7193969E+07  5.6678618E+07
  5.6167834E+07  5.5661580E+07  5.5159815E+07  5.4662501E+07
  5.4169598E+07  5.3681069E+07  5.3196875E+07  5.2716980E+07
  5.2241344E+07  5.1769933E+07  5.1302708E+07  5.0839633E+07
  5.0380672E+07  4.9925790E+07  4.9474951E+07  4.9028120E+07
  4.8585261E+07  4.8146340E+07  4.7711324E+07  4.7280177E+07
  4.6852867E+07  4.6429359E+07  4.6009620E+07  4.5593618E+07
  4.5181321E+07  4.4772695E+07  4.4367708E+07  4.3966330E+07
  4.3568528E+07  4.3174271E+07  4.2783528E+07  4.2396268E+07
  4.2012462E+07  4.1632078E+07  4.1255088E+07  4.0881460E+07
  4.0511166E+07  4.0144177E+07  3.9780463E+07  3.9419997E+07
  3.9062749E+07  3.8708691E+07  3.8357795E+07  3.8010035E+07
  3.7665381E+07  3.7323808E+07  3.6985287E+07  3.6649793E+07
  3.6317298E+07  3.5987776E+07  3.5661202E+07  3.5337549E+07
  3.5016791E+07  3.4698904E+07  3.4383862E+07  3.4071640E+07
  3.3762213E+07  3.3455557E+07  3.3151647E+07  3.2850460E+07
  3.2551970E+07  3.2256155E+07  3.1962991E+07  3.1672454E+07
  3.1384522E+07  3.1099172E+07  3.0816380E+07  3.0536125E+07
  3.0258383E+07  2.9983133E+07  2.9710353E+07  2.9440021E+07
  2.9172116E+07  2.8906615E+07  2.8643499E+07  2.8382745E+07
  2.8124333E+07  2.7868242E+07  2.7614452E+07  2.7362942E+07
  2.7113693E+07  2.6866684E+07  2.6621896E+07  2.6379308E+07
  2.6138902E+07  2.5900658E+07  2.5664558E+07  2.5430581E+07
  2.5198709E+07  2.4968925E+07  2.4741208E+07  2.4515541E+07
  2.4291906E+07  2.4070285E+07  2.3850660E+07  2.3633013E+07
  2.3417327E+07  2.3203584E+07  2.2991767E+07  2.2781859E+07
  2.2573843E+07  2.2367703E+07  2.2163421E+07  2.1960982E+07
  2.1760368E+07  2.1561564E+07  2.1364553E+07  2.1169321E+07
  2.0975850E+07  2.0784125E+07  2.0594131E+07  2.0405852E+07
  2.0219274E+07  2.0034380E+07  1.9851156E+07  1.9669588E+07
  1.9489660E+07  1.9311358E+07  1.9134667E+07  1.8959573E+07
  1.8786062E+07  1.8614119E+07  1.8443732E+07  1.8274885E+07
  1.8107566E+07  1.7941760E+07  1.7777454E+07  1.7614635E+07
  1.7453290E+07  1.7293404E+07  1.7134966E+07  1.6977963E+07
  1.6822381E+07  1.6668208E+07  1.6515432E+07  1.6364039E+07
  1.6214018E+07  1.6065356E+07  1.5918042E+07  1.5772062E+07
  1.5627406E+07  1.5484061E+07  1.5342016E+07  1.5201259E+07
  1.5061779E+07  1.4923564E+07  1.4786602E+07  1.4650883E+07
  1.4516396E+07  1.4383129E+07  1.4251072E+07  1.4120214E+07
  1.3990544E+07  1.3862051E+07  1.3734724E+07  1.3608555E+07
  1.3483531E+07  1.3359643E+07  1.3236881E+07  1.3115234E+07
  1.2994693E+07  1.2875248E+07  1.2756888E+07  1.2639604E+07
  1.2523387E+07  1.2408227E+07  1.2294114E+07  1.2181039E+07
  1.2068992E+07  1.1957966E+07  1.1847949E+07  1.1738934E+07
  1.1630910E+07  1.1523871E+07  1.1417805E+07  1.1312706E+07
  1.1208563E+07  1.1105369E+07  1.1003115E+07  1.0901793E+07
  1.0801393E+07  1.0701909E+07  1.0603331E+07  1.0505651E+07
  1.0408862E+07  1.0312955E+07  1.0217922E+07  1.0123756E+07
  1.0030449E+07  9.9379932E+06  9.8463804E+06  9.7556033E+06
  9.6656545E+06  9.5765265E+06  9.4882119E+06  9.4007033E+06
  9.3139935E+06  9.2280753E+06  9.1429415E+06  9.0585852E+06
  8.9749992E+06  8.8921766E+06  8.8101106E+06  8.7287944E+06
  8.6482210E+06  8.5683840E+06  8.4892765E+06  8.4108921E+06
  8.3332241E+06  8.2562662E+06  8.1800119E+06  8.1044549E+06
  8.0295889E+06  7.9554075E+06  7.8819047E+06  7.8090744E+06
  7.7369103E+06  7.6654066E+06  7.5945572E+06  7.5243563E+06
  7.4547979E+06  7.3858762E+06  7.3175856E+06  7.2499202E+06
  7.1828745E+06  7.1164428E+06  7.0506196E+06  6.9853993E+06
  6.9207765E+06  6.8567458E+06  6.7933019E+06  6.7304394E+06
  6.6681530E+06  6.6064376E+06  6.5452879E+06  6.4846989E+06
  6.4246654E+06  6.3651824E+06  6.3062450E+06  6.2478481E+06
  6.1899870E+06  6.1326567E+06  6.0758524E+06  6.0195693E+06
  5.9638027E+06  5.9085480E+06  5.8538005E+06  5.7995555E+06
  5.7458086E+06  5.6925551E+06  5.6397907E+06  5.5875109E+06
  5.5357112E+06  5.4843874E+06  5.4335350E+06  5.3831499E+06
  5.3332277E+06  5.2837644E+06  5.2347555E+06  5.1861972E+06
  5.1380852E+06  5.0904156E+06  5.0431842E+06  4.9963871E+06
  4.9500204E+06  4.9040801E+06  4.8585624E+06  4.8134634E+06
  4.7687793E+06  4.7245063E+06  4.6806407E+06  4.6371788E+06
  4.5941169E+06  4.5514513E+06  4.5091786E+06  4.4672949E+06
  4.4257970E+06  4.3846811E+06  4.3439439E+06  4.3035818E+06
  4.2635915E+06  4.2239697E+06  4.1847128E+06  4.1458176E+06
  4.1072808E+06  4.0690992E+06  4.0312694E+06  3.9937884E+06
  3.9566528E+06  3.9198596E+06  3.8834056E+06  3.8472877E+06
  3.8115029E+06  3.7760482E+06  3.7409204E+06  3.7061167E+06
  3.6716340E+06  3.6374695E+06  3.6036202E+06  3.5700833E+06
  3.5368558E+06  3.5039350E+06  3.4713181E+06  3.4390023E+06
  3.4069849E+06  3.3752630E+06  3.3438341E+06  3.3126954E+06
  3.2818443E+06  3.2512781E+06  3.2209943E+06  3.1909903E+06
  3.1612634E+06  3.1318113E+06  3.1026312E+06  3.0737209E+06
  3.0450778E+06  3.0166994E+06  2.9885833E+06  2.9607272E+06
  2.9331286E+06  2.9057852E+06  2.8786947E+06  2.8518547E+06
  2.8252629E+06  2.7989172E+06  2.7728151E+06  2.7469545E+06
  2.7213332E+06  2.6959490E+06  2.6707997E+06  2.6458832E+06
  2.6211972E+06  2.5967398E+06  2.5725088E+06  2.5485021E+06
  2.5247177E+06  2.5011535E+06  2.4778076E+06  2.4546778E+06
  2.4317623E+06  2.4090591E+06  2.3865662E+06  2.3642816E+06
  2.3422036E+06  2.3203301E+06  2.2986594E+06  2.2771894E+06
[truncated: 972,846 more chars]
