# Supplementary material for: 2D or not 2D: Structural and charge ordering at the solid-liquid interface of the 1-(2-hydroxyethyl)-3-methylimidazolium tetrafluoroborate ionic liquid
Source: Royal Society of Chemistry journal article supplement (doi:10.1039/c1fd00043h), 2011-07-15
Supplement: c1fd00043h.sio2 [file c1fd00043h.sio2]

Silica Potentials (Vessal) in internal units. The numbers below correspond to: i) step; ii) rvdw cuttoff and iii) total number of step.
  1.5212170E-03  7.6000000E+00      5000
 Si4+    O_2-
  9.5140002E+06  9.4702042E+06  9.4266099E+06  9.3832162E+06
  9.3400223E+06  9.2970273E+06  9.2542301E+06  9.2116300E+06
  9.1692260E+06  9.1270171E+06  9.0850026E+06  9.0431815E+06
  9.0015529E+06  8.9601159E+06  8.9188696E+06  8.8778133E+06
  8.8369459E+06  8.7962667E+06  8.7557747E+06  8.7154691E+06
  8.6753490E+06  8.6354137E+06  8.5956621E+06  8.5560936E+06
  8.5167072E+06  8.4775021E+06  8.4384775E+06  8.3996325E+06
  8.3609664E+06  8.3224782E+06  8.2841672E+06  8.2460326E+06
  8.2080735E+06  8.1702892E+06  8.1326787E+06  8.0952415E+06
  8.0579765E+06  8.0208831E+06  7.9839605E+06  7.9472078E+06
  7.9106243E+06  7.8742092E+06  7.8379617E+06  7.8018811E+06
  7.7659666E+06  7.7302174E+06  7.6946328E+06  7.6592120E+06
  7.6239542E+06  7.5888587E+06  7.5539248E+06  7.5191517E+06
  7.4845387E+06  7.4500850E+06  7.4157899E+06  7.3816527E+06
  7.3476726E+06  7.3138490E+06  7.2801810E+06  7.2466681E+06
  7.2133094E+06  7.1801042E+06  7.1470520E+06  7.1141518E+06
  7.0814031E+06  7.0488052E+06  7.0163573E+06  6.9840588E+06
  6.9519090E+06  6.9199072E+06  6.8880527E+06  6.8563448E+06
  6.8247829E+06  6.7933663E+06  6.7620942E+06  6.7309662E+06
  6.6999814E+06  6.6691393E+06  6.6384392E+06  6.6078803E+06
  6.5774622E+06  6.5471841E+06  6.5170453E+06  6.4870453E+06
  6.4571834E+06  6.4274589E+06  6.3978713E+06  6.3684199E+06
  6.3391041E+06  6.3099232E+06  6.2808766E+06  6.2519637E+06
  6.2231840E+06  6.1945367E+06  6.1660213E+06  6.1376372E+06
  6.1093837E+06  6.0812603E+06  6.0532663E+06  6.0254012E+06
  5.9976644E+06  5.9700553E+06  5.9425732E+06  5.9152177E+06
  5.8879881E+06  5.8608838E+06  5.8339043E+06  5.8070490E+06
  5.7803173E+06  5.7537087E+06  5.7272226E+06  5.7008584E+06
  5.6746155E+06  5.6484935E+06  5.6224917E+06  5.5966096E+06
  5.5708466E+06  5.5452023E+06  5.5196760E+06  5.4942671E+06
  5.4689753E+06  5.4437999E+06  5.4187404E+06  5.3937962E+06
  5.3689669E+06  5.3442518E+06  5.3196505E+06  5.2951625E+06
  5.2707872E+06  5.2465241E+06  5.2223727E+06  5.1983325E+06
  5.1744029E+06  5.1505835E+06  5.1268738E+06  5.1032731E+06
  5.0797812E+06  5.0563973E+06  5.0331211E+06  5.0099521E+06
  4.9868897E+06  4.9639335E+06  4.9410829E+06  4.9183376E+06
  4.8956969E+06  4.8731605E+06  4.8507278E+06  4.8283984E+06
  4.8061717E+06  4.7840474E+06  4.7620249E+06  4.7401038E+06
  4.7182836E+06  4.6965639E+06  4.6749441E+06  4.6534239E+06
  4.6320027E+06  4.6106801E+06  4.5894557E+06  4.5683290E+06
  4.5472996E+06  4.5263669E+06  4.5055306E+06  4.4847902E+06
  4.4641453E+06  4.4435955E+06  4.4231402E+06  4.4027791E+06
  4.3825117E+06  4.3623376E+06  4.3422564E+06  4.3222676E+06
  4.3023709E+06  4.2825657E+06  4.2628517E+06  4.2432285E+06
  4.2236955E+06  4.2042525E+06  4.1848990E+06  4.1656346E+06
  4.1464589E+06  4.1273715E+06  4.1083719E+06  4.0894597E+06
  4.0706347E+06  4.0518962E+06  4.0332441E+06  4.0146778E+06
  3.9961970E+06  3.9778012E+06  3.9594901E+06  3.9412634E+06
  3.9231205E+06  3.9050611E+06  3.8870849E+06  3.8691914E+06
  3.8513803E+06  3.8336512E+06  3.8160037E+06  3.7984374E+06
  3.7809520E+06  3.7635471E+06  3.7462223E+06  3.7289773E+06
  3.7118116E+06  3.6947250E+06  3.6777170E+06  3.6607873E+06
  3.6439356E+06  3.6271614E+06  3.6104644E+06  3.5938443E+06
  3.5773007E+06  3.5608333E+06  3.5444416E+06  3.5281254E+06
  3.5118844E+06  3.4957181E+06  3.4796262E+06  3.4636084E+06
  3.4476643E+06  3.4317936E+06  3.4159960E+06  3.4002711E+06
  3.3846185E+06  3.3690381E+06  3.3535293E+06  3.3380920E+06
  3.3227257E+06  3.3074301E+06  3.2922050E+06  3.2770499E+06
  3.2619646E+06  3.2469488E+06  3.2320021E+06  3.2171241E+06
  3.2023147E+06  3.1875734E+06  3.1729000E+06  3.1582942E+06
  3.1437556E+06  3.1292839E+06  3.1148788E+06  3.1005400E+06
  3.0862672E+06  3.0720602E+06  3.0579185E+06  3.0438420E+06
  3.0298302E+06  3.0158829E+06  3.0019999E+06  2.9881807E+06
  2.9744252E+06  2.9607330E+06  2.9471038E+06  2.9335373E+06
  2.9200333E+06  2.9065915E+06  2.8932116E+06  2.8798932E+06
  2.8666361E+06  2.8534401E+06  2.8403048E+06  2.8272300E+06
  2.8142154E+06  2.8012607E+06  2.7883656E+06  2.7755298E+06
  2.7627532E+06  2.7500354E+06  2.7373761E+06  2.7247751E+06
  2.7122321E+06  2.6997468E+06  2.6873191E+06  2.6749485E+06
  2.6626348E+06  2.6503779E+06  2.6381774E+06  2.6260330E+06
  2.6139446E+06  2.6019117E+06  2.5899343E+06  2.5780120E+06
  2.5661446E+06  2.5543319E+06  2.5425735E+06  2.5308692E+06
  2.5192188E+06  2.5076221E+06  2.4960787E+06  2.4845885E+06
  2.4731511E+06  2.4617664E+06  2.4504341E+06  2.4391540E+06
  2.4279258E+06  2.4167493E+06  2.4056242E+06  2.3945504E+06
  2.3835275E+06  2.3725554E+06  2.3616338E+06  2.3507624E+06
  2.3399411E+06  2.3291697E+06  2.3184478E+06  2.3077752E+06
  2.2971518E+06  2.2865773E+06  2.2760514E+06  2.2655741E+06
  2.2551449E+06  2.2447638E+06  2.2344304E+06  2.2241446E+06
  2.2139062E+06  2.2037149E+06  2.1935705E+06  2.1834728E+06
  2.1734216E+06  2.1634166E+06  2.1534577E+06  2.1435447E+06
  2.1336773E+06  2.1238553E+06  2.1140785E+06  2.1043468E+06
  2.0946598E+06  2.0850174E+06  2.0754194E+06  2.0658656E+06
  2.0563558E+06  2.0468897E+06  2.0374672E+06  2.0280881E+06
  2.0187522E+06  2.0094593E+06  2.0002091E+06  1.9910015E+06
  1.9818363E+06  1.9727133E+06  1.9636322E+06  1.9545930E+06
  1.9455954E+06  1.9366392E+06  1.9277243E+06  1.9188504E+06
  1.9100173E+06  1.9012249E+06  1.8924729E+06  1.8837613E+06
  1.8750897E+06  1.8664581E+06  1.8578662E+06  1.8493139E+06
  1.8408009E+06  1.8323271E+06  1.8238923E+06  1.8154964E+06
  1.8071391E+06  1.7988202E+06  1.7905397E+06  1.7822973E+06
  1.7740928E+06  1.7659261E+06  1.7577970E+06  1.7497053E+06
  1.7416509E+06  1.7336335E+06  1.7256530E+06  1.7177093E+06
  1.7098021E+06  1.7019314E+06  1.6940969E+06  1.6862984E+06
  1.6785358E+06  1.6708090E+06  1.6631177E+06  1.6554619E+06
  1.6478413E+06  1.6402557E+06  1.6327051E+06  1.6251893E+06
  1.6177080E+06  1.6102612E+06  1.6028487E+06  1.5954702E+06
  1.5881258E+06  1.5808151E+06  1.5735382E+06  1.5662947E+06
  1.5590845E+06  1.5519076E+06  1.5447636E+06  1.5376526E+06
  1.5305743E+06  1.5235286E+06  1.5165153E+06  1.5095343E+06
  1.5025854E+06  1.4956686E+06  1.4887835E+06  1.4819302E+06
  1.4751084E+06  1.4683180E+06  1.4615589E+06  1.4548309E+06
  1.4481338E+06  1.4414676E+06  1.4348321E+06  1.4282271E+06
  1.4216525E+06  1.4151082E+06  1.4085940E+06  1.4021098E+06
  1.3956555E+06  1.3892308E+06  1.3828358E+06  1.3764701E+06
  1.3701338E+06  1.3638266E+06  1.3575485E+06  1.3512993E+06
  1.3450788E+06  1.3388870E+06  1.3327237E+06  1.3265888E+06
  1.3204820E+06  1.3144035E+06  1.3083528E+06  1.3023301E+06
  1.2963350E+06  1.2903676E+06  1.2844276E+06  1.2785150E+06
  1.2726296E+06  1.2667713E+06  1.2609399E+06  1.2551354E+06
  1.2493577E+06  1.2436065E+06  1.2378818E+06  1.2321834E+06
  1.2265113E+06  1.2208652E+06  1.2152452E+06  1.2096511E+06
  1.2040827E+06  1.1985399E+06  1.1930226E+06  1.1875308E+06
  1.1820642E+06  1.1766228E+06  1.1712064E+06  1.1658150E+06
  1.1604484E+06  1.1551065E+06  1.1497891E+06  1.1444963E+06
  1.1392278E+06  1.1339836E+06  1.1287635E+06  1.1235675E+06
  1.1183953E+06  1.1132470E+06  1.1081224E+06  1.1030213E+06
  1.0979438E+06  1.0928896E+06  1.0878587E+06  1.0828509E+06
  1.0778662E+06  1.0729045E+06  1.0679655E+06  1.0630494E+06
  1.0581558E+06  1.0532848E+06  1.0484362E+06  1.0436099E+06
  1.0388058E+06  1.0340239E+06  1.0292640E+06  1.0245259E+06
  1.0198097E+06  1.0151152E+06  1.0104423E+06  1.0057909E+06
  1.0011610E+06  9.9655230E+05  9.9196485E+05  9.8739853E+05
  9.8285322E+05  9.7832884E+05  9.7382528E+05  9.6934246E+05
  9.6488027E+05  9.6043862E+05  9.5601742E+05  9.5161657E+05
  9.4723598E+05  9.4287555E+05  9.3853520E+05  9.3421483E+05
  9.2991434E+05  9.2563365E+05  9.2137267E+05  9.1713130E+05
  9.1290946E+05  9.0870705E+05  9.0452398E+05  9.0036017E+05
  8.9621553E+05  8.9208997E+05  8.8798340E+05  8.8389573E+05
  8.7982688E+05  8.7577676E+05  8.7174528E+05  8.6773236E+05
  8.6373792E+05  8.5976186E+05  8.5580411E+05  8.5186457E+05
  8.4794317E+05  8.4403982E+05  8.4015444E+05  8.3628694E+05
  8.3243725E+05  8.2860528E+05  8.2479095E+05  8.2099418E+05
  8.1721488E+05  8.1345298E+05  8.0970840E+05  8.0598106E+05
  8.0227088E+05  7.9857777E+05  7.9490167E+05  7.9124248E+05
  7.8760014E+05  7.8397457E+05  7.8036569E+05  7.7677342E+05
  7.7319769E+05  7.6963842E+05  7.6609553E+05  7.6256895E+05
  7.5905860E+05  7.5556442E+05  7.5208632E+05  7.4862423E+05
  7.4517807E+05  7.4174778E+05  7.3833329E+05  7.3493451E+05
  7.3155137E+05  7.2818381E+05  7.2483175E+05  7.2149512E+05
  7.1817385E+05  7.1486787E+05  7.1157711E+05  7.0830150E+05
  7.0504096E+05  7.0179543E+05  6.9856485E+05  6.9534914E+05
  6.9214822E+05  6.8896205E+05  6.8579054E+05  6.8263363E+05
  6.7949125E+05  6.7636334E+05  6.7324983E+05  6.7015064E+05
  6.6706573E+05  6.6399502E+05  6.6093844E+05  6.5789593E+05
  6.5486743E+05  6.5185287E+05  6.4885218E+05  6.4586531E+05
  6.4289219E+05  6.3993275E+05  6.3698694E+05  6.3405469E+05
  6.3113594E+05  6.2823062E+05  6.2533868E+05  6.2246005E+05
  6.1959467E+05  6.1674248E+05  6.1390342E+05  6.1107743E+05
  6.0826444E+05  6.0546441E+05  6.0267727E+05  5.9990295E+05
  5.9714141E+05  5.9439258E+05  5.9165641E+05  5.8893283E+05
  5.8622178E+05  5.8352322E+05  5.8083708E+05  5.7816330E+05
  5.7550183E+05  5.7285262E+05  5.7021560E+05  5.6759071E+05
  5.6497792E+05  5.6237714E+05  5.5978834E+05  5.5721146E+05
  5.5464644E+05  5.5209323E+05  5.4955177E+05  5.4702201E+05
  5.4450390E+05  5.4199737E+05  5.3950239E+05  5.3701889E+05
  5.3454682E+05  5.3208614E+05  5.2963677E+05  5.2719869E+05
  5.2477183E+05  5.2235614E+05  5.1995157E+05  5.1755807E+05
  5.1517558E+05  5.1280407E+05  5.1044347E+05  5.0809374E+05
  5.0575482E+05  5.0342667E+05  5.0110924E+05  4.9880248E+05
  4.9650633E+05  4.9422076E+05  4.9194571E+05  4.8968112E+05
  4.8742697E+05  4.8518319E+05  4.8294974E+05  4.8072657E+05
  4.7851363E+05  4.7631088E+05  4.7411827E+05  4.7193576E+05
  4.6976329E+05  4.6760082E+05  4.6544831E+05  4.6330570E+05
  4.6117296E+05  4.5905003E+05  4.5693688E+05  4.5483346E+05
  4.5273972E+05  4.5065561E+05  4.4858110E+05  4.4651614E+05
  4.4446069E+05  4.4241470E+05  4.4037812E+05  4.3835092E+05
  4.3633306E+05  4.3432448E+05  4.3232514E+05  4.3033502E+05
  4.2835405E+05  4.2638220E+05  4.2441943E+05  4.2246569E+05
  4.2052095E+05  4.1858516E+05  4.1665828E+05  4.1474027E+05
  4.1283109E+05  4.1093070E+05  4.0903905E+05  4.0715612E+05
  4.0528185E+05  4.0341621E+05  4.0155916E+05  3.9971066E+05
  3.9787066E+05  3.9603914E+05  3.9421604E+05  3.9240134E+05
  3.9059500E+05  3.8879697E+05  3.8700721E+05  3.8522569E+05
  3.8345238E+05  3.8168723E+05  3.7993020E+05  3.7818126E+05
  3.7644037E+05  3.7470750E+05  3.7298260E+05  3.7126565E+05
  3.6955660E+05  3.6785541E+05  3.6616206E+05  3.6447650E+05
  3.6279870E+05  3.6112862E+05  3.5946623E+05  3.5781149E+05
  3.5616438E+05  3.5452484E+05  3.5289285E+05  3.5126837E+05
  3.4965137E+05  3.4804182E+05  3.4643967E+05  3.4484490E+05
  3.4325747E+05  3.4167735E+05  3.4010450E+05  3.3853889E+05
  3.3698049E+05  3.3542926E+05  3.3388518E+05  3.3234820E+05
  3.3081829E+05  3.2929543E+05  3.2777958E+05  3.2627071E+05
  3.2476878E+05  3.2327377E+05  3.2178564E+05  3.2030436E+05
  3.1882990E+05  3.1736222E+05  3.1590130E+05  3.1444711E+05
  3.1299961E+05  3.1155878E+05  3.1012457E+05  3.0869697E+05
  3.0727594E+05  3.0586145E+05  3.0445348E+05  3.0305198E+05
  3.0165694E+05  3.0026832E+05  2.9888609E+05  2.9751022E+05
  2.9614069E+05  2.9477746E+05  2.9342050E+05  2.9206980E+05
  2.9072531E+05  2.8938701E+05  2.8805487E+05  2.8672886E+05
  2.8540896E+05  2.8409513E+05  2.8278735E+05  2.8148559E+05
  2.8018983E+05  2.7890002E+05  2.7761616E+05  2.7633820E+05
  2.7506613E+05  2.7379992E+05  2.7253953E+05  2.7128494E+05
  2.7003613E+05  2.6879307E+05  2.6755573E+05  2.6632409E+05
  2.6509812E+05  2.6387779E+05  2.6266307E+05  2.6145395E+05
  2.6025040E+05  2.5905238E+05  2.5785988E+05  2.5667287E+05
  2.5549133E+05  2.5431522E+05  2.5314453E+05  2.5197922E+05
  2.5081928E+05  2.4966468E+05  2.4851540E+05  2.4737140E+05
  2.4623267E+05  2.4509919E+05  2.4397092E+05  2.4284784E+05
  2.4172994E+05  2.4061718E+05  2.3950954E+05  2.3840701E+05
  2.3730954E+05  2.3621713E+05  2.3512975E+05  2.3404737E+05
  2.3296998E+05  2.3189755E+05  2.3083005E+05  2.2976747E+05
  2.2870977E+05  2.2765695E+05  2.2660897E+05  2.2556582E+05
  2.2452747E+05  2.2349390E+05  2.2246509E+05  2.2144101E+05
  2.2042165E+05  2.1940698E+05  2.1839698E+05  2.1739163E+05
  2.1639091E+05  2.1539479E+05  2.1440326E+05  2.1341629E+05
  2.1243387E+05  2.1145597E+05  2.1048257E+05  2.0951366E+05
  2.0854920E+05  2.0758918E+05  2.0663358E+05  2.0568238E+05
  2.0473556E+05  2.0379310E+05  2.0285498E+05  2.0192117E+05
  2.0099166E+05  2.0006644E+05  1.9914547E+05  1.9822874E+05
  1.9731623E+05  1.9640792E+05  1.9550379E+05  1.9460383E+05
  1.9370800E+05  1.9281630E+05  1.9192871E+05  1.9104520E+05
  1.9016576E+05  1.8929037E+05  1.8841900E+05  1.8755165E+05
  1.8668829E+05  1.8582891E+05  1.8497348E+05  1.8412199E+05
  1.8327442E+05  1.8243075E+05  1.8159096E+05  1.8075504E+05
  1.7992297E+05  1.7909473E+05  1.7827030E+05  1.7744966E+05
  1.7663281E+05  1.7581971E+05  1.7501036E+05  1.7420473E+05
  1.7340281E+05  1.7260458E+05  1.7181003E+05  1.7101913E+05
  1.7023188E+05  1.6944825E+05  1.6866822E+05  1.6789179E+05
  1.6711893E+05  1.6634963E+05  1.6558387E+05  1.6482163E+05
  1.6406291E+05  1.6330768E+05  1.6255592E+05  1.6180762E+05
  1.6106277E+05  1.6032135E+05  1.5958334E+05  1.5884873E+05
  1.5811750E+05  1.5738963E+05  1.5666512E+05  1.5594394E+05
  1.5522608E+05  1.5451152E+05  1.5380026E+05  1.5309227E+05
  1.5238754E+05  1.5168605E+05  1.5098779E+05  1.5029275E+05
  1.4960090E+05  1.4891224E+05  1.4822675E+05  1.4754442E+05
  1.4686522E+05  1.4618916E+05  1.4551620E+05  1.4484634E+05
  1.4417957E+05  1.4351587E+05  1.4285522E+05  1.4219761E+05
  1.4154303E+05  1.4089146E+05  1.4024290E+05  1.3959731E+05
  1.3895470E+05  1.3831505E+05  1.3767834E+05  1.3704457E+05
  1.3641371E+05  1.3578575E+05  1.3516069E+05  1.3453850E+05
  1.3391918E+05  1.3330270E+05  1.3268907E+05  1.3207826E+05
  1.3147026E+05  1.3086506E+05  1.3026265E+05  1.2966301E+05
  1.2906613E+05  1.2847200E+05  1.2788060E+05  1.2729193E+05
  1.2670596E+05  1.2612269E+05  1.2554211E+05  1.2496420E+05
  1.2438895E+05  1.2381635E+05  1.2324639E+05  1.2267904E+05
  1.2211431E+05  1.2155218E+05  1.2099264E+05  1.2043567E+05
  1.1988127E+05  1.1932942E+05  1.1878011E+05  1.1823332E+05
  1.1768906E+05  1.1714730E+05  1.1660803E+05  1.1607125E+05
  1.1553694E+05  1.1500508E+05  1.1447568E+05  1.1394871E+05
  1.1342417E+05  1.1290204E+05  1.1238232E+05  1.1186499E+05
  1.1135004E+05  1.1083746E+05  1.1032724E+05  1.0981937E+05
  1.0931384E+05  1.0881063E+05  1.0830974E+05  1.0781116E+05
  1.0731487E+05  1.0682086E+05  1.0632913E+05  1.0583967E+05
  1.0535245E+05  1.0486748E+05  1.0438474E+05  1.0390423E+05
  1.0342592E+05  1.0294982E+05  1.0247591E+05  1.0200418E+05
  1.0153463E+05  1.0106723E+05  1.0057420E+05  1.0011119E+05
  9.9650317E+04  9.9191555E+04  9.8734897E+04  9.8280331E+04
  9.7827845E+04  9.7377428E+04  9.6929067E+04  9.6482753E+04
  9.6038472E+04  9.5596214E+04  9.5155968E+04  9.4717721E+04
  9.4281463E+04  9.3847183E+04  9.3414870E+04  9.2984512E+04
  9.2556099E+04  9.2129619E+04  9.1705061E+04  9.1282416E+04
  9.0861671E+04  9.0442817E+04  9.0025843E+04  8.9610737E+04
  8.9197490E+04  8.8786091E+04  8.8376530E+04  8.7968795E+04
  8.7562878E+04  8.7158767E+04  8.6756452E+04  8.6355924E+04
  8.5957172E+04  8.5560185E+04  8.5164955E+04  8.4771471E+04
  8.4379722E+04  8.3989701E+04  8.3601395E+04  8.3214797E+04
  8.2829895E+04  8.2446681E+04  8.2065145E+04  8.1685277E+04
  8.1307069E+04  8.0930509E+04  8.0555590E+04  8.0182302E+04
  7.9810635E+04  7.9440580E+04  7.9072129E+04  7.8705272E+04
  7.8340000E+04  7.7976303E+04  7.7614174E+04  7.7253603E+04
  7.6894582E+04  7.6537101E+04  7.6181151E+04  7.5826725E+04
  7.5473813E+04  7.5122407E+04  7.4772499E+04  7.4424079E+04
  7.4077139E+04  7.3731672E+04  7.3387668E+04  7.3045119E+04
  7.2704017E+04  7.2364354E+04  7.2026122E+04  7.1689313E+04
  7.1353918E+04  7.1019930E+04  7.0687340E+04  7.0356141E+04
  7.0026324E+04  6.9697883E+04  6.9370809E+04  6.9045094E+04
  6.8720731E+04  6.8397713E+04  6.8076031E+04  6.7755678E+04
  6.7436646E+04  6.7118929E+04  6.6802519E+04  6.6487408E+04
  6.6173590E+04  6.5861056E+04  6.5549800E+04  6.5239814E+04
  6.4931092E+04  6.4623626E+04  6.4317409E+04  6.4012435E+04
  6.3708696E+04  6.3406186E+04  6.3104897E+04  6.2804823E+04
  6.2505957E+04  6.2208293E+04  6.1911823E+04  6.1616542E+04
  6.1322442E+04  6.1029517E+04  6.0737760E+04  6.0447165E+04
  6.0157726E+04  5.9869437E+04  5.9582290E+04  5.9296280E+04
  5.9011400E+04  5.8727645E+04  5.8445007E+04  5.8163482E+04
  5.7883062E+04  5.7603742E+04  5.7325517E+04  5.7048379E+04
  5.6772323E+04  5.6497343E+04  5.6223434E+04  5.5950589E+04
  5.5678803E+04  5.5408070E+04  5.5138385E+04  5.4869741E+04
  5.4602134E+04  5.4335558E+04  5.4070006E+04  5.3805475E+04
  5.3541958E+04  5.3279450E+04  5.3017946E+04  5.2757440E+04
  5.2497927E+04  5.2239402E+04  5.1981859E+04  5.1725294E+04
  5.1469702E+04  5.1215077E+04  5.0961414E+04  5.0708709E+04
  5.0456956E+04  5.0206150E+04  4.9956288E+04  4.9707362E+04
  4.9459370E+04  4.9212306E+04  4.8966166E+04  4.8720944E+04
  4.8476636E+04  4.8233238E+04  4.7990744E+04  4.7749151E+04
  4.7508454E+04  4.7268648E+04  4.7029729E+04  4.6791692E+04
  4.6554534E+04  4.6318249E+04  4.6082834E+04  4.5848284E+04
  4.5614595E+04  4.5381762E+04  4.5149783E+04  4.4918651E+04
  4.4688365E+04  4.4458918E+04  4.4230308E+04  4.4002530E+04
  4.3775581E+04  4.3549456E+04  4.3324151E+04  4.3099663E+04
  4.2875988E+04  4.2653122E+04  4.2431061E+04  4.2209802E+04
  4.1989341E+04  4.1769674E+04  4.1550797E+04  4.1332708E+04
  4.1115402E+04  4.0898875E+04  4.0683125E+04  4.0468148E+04
  4.0253940E+04  4.0040499E+04  3.9827820E+04  3.9615900E+04
  3.9404736E+04  3.9194325E+04  3.8984663E+04  3.8775748E+04
  3.8567575E+04  3.8360143E+04  3.8153447E+04  3.7947484E+04
  3.7742252E+04  3.7537748E+04  3.7333968E+04  3.7130909E+04
  3.6928569E+04  3.6726944E+04  3.6526032E+04  3.6325829E+04
  3.6126334E+04  3.5927542E+04  3.5729452E+04  3.5532060E+04
  3.5335364E+04  3.5139361E+04  3.4944048E+04  3.4749423E+04
  3.4555483E+04  3.4362226E+04  3.4169648E+04  3.3977748E+04
  3.3786522E+04  3.3595969E+04  3.3406085E+04  3.3216869E+04
  3.3028318E+04  3.2840429E+04  3.2653201E+04  3.2466630E+04
  3.2280715E+04  3.2095453E+04  3.1910842E+04  3.1726879E+04
  3.1543563E+04  3.1360892E+04  3.1178862E+04  3.0997473E+04
  3.0816721E+04  3.0636605E+04  3.0457122E+04  3.0278272E+04
  3.0100050E+04  2.9922457E+04  2.9745488E+04  2.9569144E+04
  2.9393421E+04  2.9218318E+04  2.9043833E+04  2.8869963E+04
  2.8696708E+04  2.8524065E+04  2.8352033E+04  2.8180609E+04
  2.8009792E+04  2.7839581E+04  2.7669973E+04  2.7500967E+04
  2.7332561E+04  2.7164753E+04  2.6997542E+04  2.6830927E+04
  2.6664905E+04  2.6499475E+04  2.6334635E+04  2.6170385E+04
  2.6006721E+04  2.5843644E+04  2.5681152E+04  2.5519242E+04
  2.5357914E+04  2.5197166E+04  2.5036996E+04  2.4877404E+04
  2.4718389E+04  2.4559947E+04  2.4402079E+04  2.4244783E+04
  2.4088058E+04  2.3931902E+04  2.3776315E+04  2.3621294E+04
  2.3466840E+04  2.3312949E+04  2.3159622E+04  2.3006858E+04
  2.2854654E+04  2.2703010E+04  2.2551925E+04  2.2401398E+04
  2.2251427E+04  2.2102012E+04  2.1953151E+04  2.1804844E+04
  2.1657089E+04  2.1509885E+04  2.1363232E+04  2.1217128E+04
  2.1071573E+04  2.0926565E+04  2.0782104E+04  2.0638189E+04
  2.0494818E+04  2.0351991E+04  2.0209707E+04  2.0067966E+04
  1.9926765E+04  1.9786105E+04  1.9645985E+04  1.9506403E+04
  1.9367360E+04  1.9228853E+04  1.9090884E+04  1.8953449E+04
  1.8816550E+04  1.8680185E+04  1.8544354E+04  1.8409056E+04
  1.8274289E+04  1.8140054E+04  1.8006350E+04  1.7873176E+04
  1.7740531E+04  1.7608415E+04  1.7476828E+04  1.7345768E+04
  1.7215235E+04  1.7085228E+04  1.6955747E+04  1.6826791E+04
  1.6698360E+04  1.6570453E+04  1.6443070E+04  1.6316210E+04
  1.6189872E+04  1.6064056E+04  1.5938762E+04  1.5813988E+04
  1.5689735E+04  1.5566002E+04  1.5442789E+04  1.5320095E+04
  1.5197919E+04  1.5076262E+04  1.4955123E+04  1.4834500E+04
  1.4714395E+04  1.4594806E+04  1.4475733E+04  1.4357176E+04
  1.4239134E+04  1.4121608E+04  1.4004595E+04  1.3888097E+04
  1.3772113E+04  1.3656642E+04  1.3541684E+04  1.3427239E+04
  1.3313306E+04  1.3199886E+04  1.3086977E+04  1.2974579E+04
  1.2862693E+04  1.2751318E+04  1.2640452E+04  1.2530098E+04
  1.2420253E+04  1.2310917E+04  1.2202091E+04  1.2093774E+04
  1.1985966E+04  1.1878666E+04  1.1771875E+04  1.1665591E+04
  1.1559815E+04  1.1454546E+04  1.1349785E+04  1.1245530E+04
  1.1141782E+04  1.1038541E+04  1.0935805E+04  1.0833576E+04
  1.0731852E+04  1.0630634E+04  1.0529921E+04  1.0429712E+04
  1.0330009E+04  1.0230810E+04  1.0132115E+04  1.0033924E+04
  9.9362372E+03  9.8390538E+03  9.7423738E+03  9.6461969E+03
  9.5505228E+03  9.4553515E+03  9.3606826E+03  9.2665159E+03
  9.1728512E+03  9.0796883E+03  8.9870270E+03  8.8948670E+03
  8.8032081E+03  8.7120501E+03  8.6213927E+03  8.5312358E+03
  8.4415790E+03  8.3524222E+03  8.2637652E+03  8.1756076E+03
  8.0879493E+03  8.0007900E+03  7.9141296E+03  7.8279676E+03
  7.7423040E+03  7.6571384E+03  7.5724706E+03  7.4883003E+03
  7.4046274E+03  7.3214515E+03  7.2387724E+03  7.1565897E+03
  7.0749033E+03  6.9937129E+03  6.9130182E+03  6.8328188E+03
  6.7531146E+03  6.6739052E+03  6.5951904E+03  6.5169698E+03
  6.4392431E+03  6.3620101E+03  6.2852704E+03  6.2090236E+03
  6.1332696E+03  6.0580078E+03  5.9832381E+03  5.9089601E+03
  5.8351733E+03  5.7618775E+03  5.6890724E+03  5.6167574E+03
  5.5449324E+03  5.4735968E+03  5.4027503E+03  5.3323925E+03
  5.2625230E+03  5.1931413E+03  5.1242472E+03  5.0558401E+03
  4.9879197E+03  4.9204854E+03  4.8535368E+03  4.7870736E+03
  4.7210951E+03  4.6556010E+03  4.5905908E+03  4.5260639E+03
  4.4620199E+03  4.3984582E+03  4.3353784E+03  4.2727799E+03
  4.2106622E+03  4.1490247E+03  4.0878669E+03  4.0271882E+03
  3.9669880E+03  3.9072658E+03  3.8480209E+03  3.7892528E+03
  3.7309607E+03  3.6731442E+03  3.6158025E+03  3.5589350E+03
  3.5025411E+03  3.4466199E+03  3.3911710E+03  3.3361935E+03
  3.2816868E+03  3.2276501E+03  3.1740828E+03  3.1209839E+03
  3.0683529E+03  3.0161888E+03  2.9644910E+03  2.9132587E+03
  2.8624909E+03  2.8121870E+03  2.7623460E+03  2.7129670E+03
  2.6640494E+03  2.6155920E+03  2.5675942E+03  2.5200548E+03
  2.4729731E+03  2.4263481E+03  2.3801788E+03  2.3344643E+03
  2.2892035E+03  2.2443956E+03  2.2000394E+03  2.1561339E+03
  2.1126781E+03  2.0696710E+03  2.0271114E+03  1.9849983E+03
  1.9433306E+03  1.9021071E+03  1.8613267E+03  1.8209882E+03
  1.7810905E+03  1.7416323E+03  1.7026125E+03  1.6640299E+03
  1.6258831E+03  1.5881710E+03  1.5508922E+03  1.5140454E+03
  1.4776294E+03  1.4416428E+03  1.4060843E+03  1.3709525E+03
  1.3362459E+03  1.3019632E+03  1.2681031E+03  1.2346639E+03
  1.2016443E+03  1.1690427E+03  1.1368578E+03  1.1050878E+03
  1.0737314E+03  1.0427869E+03  1.0122528E+03  9.8212748E+02
  9.5240927E+02  9.2309654E+02  8.9418765E+02  8.6568090E+02
  8.3757458E+02  8.0986698E+02  7.8255633E+02  7.5564088E+02
  7.2911883E+02  7.0298836E+02  6.7724764E+02  6.5189482E+02
  6.2692801E+02  6.0234531E+02  5.7814480E+02  5.5432453E+02
  5.3088254E+02  5.0781682E+02  4.8512536E+02  4.6280613E+02
  4.4085705E+02  4.1927606E+02  3.9806102E+02  3.7720982E+02
  3.5672029E+02  3.3659026E+02  3.1681751E+02  2.9739981E+02
  2.7833492E+02  2.5962054E+02  2.4125438E+02  2.2323411E+02
  2.0555737E+02  1.8822178E+02  1.7122494E+02  1.5456440E+02
  1.3823773E+02  1.2224242E+02  1.0657598E+02  9.1235872E+01
  7.6219526E+01  6.1524359E+01  4.7147753E+01  3.3087068E+01
  1.9339634E+01  5.9027552E+00 -7.2262918E+00 -2.0050258E+01
 -3.2571922E+01 -4.4794090E+01 -5.6719596E+01 -6.8351302E+01
 -7.9692099E+01 -9.0744905E+01 -1.0151267E+02 -1.1199836E+02
 -1.2220500E+02 -1.3213560E+02 -1.4179324E+02 -1.5118100E+02
 -1.6030201E+02 -1.6915941E+02 -1.7775640E+02 -1.8609617E+02
 -1.9418197E+02 -2.0201707E+02 -2.0960477E+02 -2.1694841E+02
 -2.2405133E+02 -2.3091694E+02 -2.3754867E+02 -2.4394995E+02
 -2.5012428E+02 -2.5607519E+02 -2.6180620E+02 -2.6732091E+02
 -2.7262293E+02 -2.7771590E+02 -2.8260350E+02 -2.8728943E+02
 -2.9177744E+02 -2.9607130E+02 -3.0017481E+02 -3.0409182E+02
 -3.0782619E+02 -3.1138184E+02 -3.1476269E+02 -3.1797272E+02
 -3.2101593E+02 -3.2389637E+02 -3.2661811E+02 -3.2918525E+02
 -3.3160193E+02 -3.3387233E+02 -3.3600067E+02 -3.3799117E+02
 -3.3984813E+02 -3.4157586E+02 -3.4317870E+02 -3.4466105E+02
 -3.4602731E+02 -3.4728195E+02 -3.4842946E+02 -3.4947436E+02
 -3.5042122E+02 -3.5127464E+02 -3.5203924E+02 -3.5271971E+02
 -3.5332075E+02 -3.5384711E+02 -3.5430356E+02 -3.5469494E+02
 -3.5502608E+02 -3.5530190E+02 -3.5552731E+02 -3.5570728E+02
 -3.5584683E+02 -3.5595100E+02 -3.5602487E+02 -3.5607356E+02
 -3.5610222E+02 -3.5611607E+02 -3.5612032E+02 -3.5616081E+02
 -3.5615857E+02 -3.5615425E+02 -3.5614785E+02 -3.5613940E+02
 -3.5612888E+02 -3.5611631E+02 -3.5610169E+02 -3.5608502E+02
 -3.5606631E+02 -3.5604556E+02 -3.5602278E+02 -3.5599798E+02
 -3.5597115E+02 -3.5594230E+02 -3.5591144E+02 -3.5587857E+02
 -3.5584370E+02 -3.5580683E+02 -3.5576797E+02 -3.5572712E+02
 -3.5568428E+02 -3.5563946E+02 -3.5559267E+02 -3.5554391E+02
 -3.5549318E+02 -3.5544049E+02 -3.5538585E+02 -3.5532926E+02
 -3.5527071E+02 -3.5521023E+02 -3.5514781E+02 -3.5508346E+02
 -3.5501718E+02 -3.5494898E+02 -3.5487886E+02 -3.5480682E+02
 -3.5473288E+02 -3.5465704E+02 -3.5457929E+02 -3.5449966E+02
 -3.5441813E+02 -3.5433472E+02 -3.5424942E+02 -3.5416226E+02
 -3.5407322E+02 -3.5398232E+02 -3.5388955E+02 -3.5379493E+02
 -3.5369846E+02 -3.5360014E+02 -3.5349998E+02 -3.5339799E+02
 -3.5329416E+02 -3.5318850E+02 -3.5308102E+02 -3.5297172E+02
 -3.5286061E+02 -3.5274769E+02 -3.5263297E+02 -3.5251644E+02
 -3.5239812E+02 -3.5227802E+02 -3.5215613E+02 -3.5203245E+02
 -3.5190701E+02 -3.5177979E+02 -3.5165080E+02 -3.5152006E+02
 -3.5138756E+02 -3.5125331E+02 -3.5111731E+02 -3.5097956E+02
 -3.5084008E+02 -3.5069887E+02 -3.5055593E+02 -3.5041127E+02
 -3.5026489E+02 -3.5011679E+02 -3.4996699E+02 -3.4981548E+02
 -3.4966228E+02 -3.4950737E+02 -3.4935078E+02 -3.4919251E+02
 -3.4903255E+02 -3.4887092E+02 -3.4870761E+02 -3.4854264E+02
 -3.4837601E+02 -3.4820773E+02 -3.4803779E+02 -3.4786620E+02
 -3.4769297E+02 -3.4751811E+02 -3.4734161E+02 -3.4716348E+02
 -3.4698373E+02 -3.4680236E+02 -3.4661938E+02 -3.4643479E+02
 -3.4624859E+02 -3.4606080E+02 -3.4587141E+02 -3.4568043E+02
 -3.4548786E+02 -3.4529371E+02 -3.4509799E+02 -3.4490070E+02
 -3.4470184E+02 -3.4450142E+02 -3.4429944E+02 -3.4409591E+02
 -3.4389083E+02 -3.4368421E+02 -3.4347606E+02 -3.4326637E+02
 -3.4305515E+02 -3.4284240E+02 -3.4262814E+02 -3.4241237E+02
 -3.4219508E+02 -3.4197629E+02 -3.4175601E+02 -3.4153422E+02
 -3.4131095E+02 -3.4108619E+02 -3.4085995E+02 -3.4063223E+02
 -3.4040304E+02 -3.4017239E+02 -3.3994027E+02 -3.3970670E+02
 -3.3947167E+02 -3.3923520E+02 -3.3899729E+02 -3.3875793E+02
 -3.3851714E+02 -3.3827493E+02 -3.3803129E+02 -3.3778623E+02
 -3.3753976E+02 -3.3729188E+02 -3.3704259E+02 -3.3679190E+02
 -3.3653982E+02 -3.3628635E+02 -3.3603149E+02 -3.3577525E+02
 -3.3551763E+02 -3.3525865E+02 -3.3499829E+02 -3.3473658E+02
 -3.3447350E+02 -3.3420908E+02 -3.3394330E+02 -3.3367619E+02
 -3.3340773E+02 -3.3313794E+02 -3.3286683E+02 -3.3259439E+02
 -3.3232063E+02 -3.3204555E+02 -3.3176917E+02 -3.3149148E+02
 -3.3121249E+02 -3.3093220E+02 -3.3065063E+02 -3.3036777E+02
 -3.3008362E+02 -3.2979820E+02 -3.2951151E+02 -3.2922355E+02
 -3.2893433E+02 -3.2864385E+02 -3.2835212E+02 -3.2805914E+02
 -3.2776492E+02 -3.2746946E+02 -3.2717277E+02 -3.2687484E+02
 -3.2657570E+02 -3.2627533E+02 -3.2597375E+02 -3.2567096E+02
 -3.2536696E+02 -3.2506176E+02 -3.2475537E+02 -3.2444779E+02
 -3.2413902E+02 -3.2382906E+02 -3.2351794E+02 -3.2320564E+02
 -3.2289217E+02 -3.2257754E+02 -3.2226175E+02 -3.2194481E+02
 -3.2162672E+02 -3.2130749E+02 -3.2098712E+02 -3.2066561E+02
 -3.2034298E+02 -3.2001922E+02 -3.1969434E+02 -3.1936835E+02
 -3.1904125E+02 -3.1871304E+02 -3.1838373E+02 -3.1805332E+02
 -3.1772183E+02 -3.1738924E+02 -3.1705558E+02 -3.1672084E+02
 -3.1638502E+02 -3.1604814E+02 -3.1571020E+02 -3.1537120E+02
 -3.1503114E+02 -3.1469004E+02 -3.1434789E+02 -3.1400470E+02
 -3.1366048E+02 -3.1331523E+02 -3.1296896E+02 -3.1262167E+02
 -3.1227336E+02 -3.1192404E+02 -3.1157371E+02 -3.1122238E+02
 -3.1087006E+02 -3.1051675E+02 -3.1016245E+02 -3.0980716E+02
 -3.0945090E+02 -3.0909367E+02 -3.0873547E+02 -3.0837631E+02
 -3.0801619E+02 -3.0765511E+02 -3.0729309E+02 -3.0693013E+02
 -3.0656622E+02 -3.0620138E+02 -3.0583561E+02 -3.0546891E+02
 -3.0510130E+02 -3.0473277E+02 -3.0436333E+02 -3.0399298E+02
 -3.0362173E+02 -3.0324959E+02 -3.0287655E+02 -3.0250263E+02
 -3.0212782E+02 -3.0175214E+02 -3.0137558E+02 -3.0099816E+02
 -3.0061988E+02 -3.0024073E+02 -2.9986073E+02 -2.9947989E+02
 -2.9909819E+02 -2.9871566E+02 -2.9833230E+02 -2.9794810E+02
 -2.9756308E+02 -2.9717724E+02 -2.9679059E+02 -2.9640312E+02
 -2.9601485E+02 -2.9562577E+02 -2.9523590E+02 -2.9484524E+02
 -2.9445379E+02 -2.9406155E+02 -2.9366854E+02 -2.9327476E+02
 -2.9288021E+02 -2.9248489E+02 -2.9208882E+02 -2.9169199E+02
 -2.9129442E+02 -2.9089610E+02 -2.9049704E+02 -2.9009724E+02
 -2.8969672E+02 -2.8929547E+02 -2.8889350E+02 -2.8849081E+02
 -2.8808741E+02 -2.8768331E+02 -2.8727850E+02 -2.8687300E+02
 -2.8646681E+02 -2.8605992E+02 -2.8565236E+02 -2.8524412E+02
 -2.8483520E+02 -2.8442562E+02 -2.8401537E+02 -2.8360446E+02
 -2.8319290E+02 -2.8278069E+02 -2.8236784E+02 -2.8195434E+02
 -2.8154021E+02 -2.8112546E+02 -2.8071007E+02 -2.8029406E+02
 -2.7987744E+02 -2.7946021E+02 -2.7904237E+02 -2.7862393E+02
 -2.7820489E+02 -2.7778526E+02 -2.7736504E+02 -2.7694424E+02
 -2.7652286E+02 -2.7610090E+02 -2.7567838E+02 -2.7525530E+02
 -2.7483165E+02 -2.7440746E+02 -2.7398271E+02 -2.7355741E+02
 -2.7313158E+02 -2.7270521E+02 -2.7227831E+02 -2.7185089E+02
 -2.7142294E+02 -2.7099448E+02 -2.7056551E+02 -2.7013603E+02
 -2.6970605E+02 -2.6927557E+02 -2.6884459E+02 -2.6841313E+02
 -2.6798119E+02 -2.6754877E+02 -2.6711587E+02 -2.6668251E+02
 -2.6624868E+02 -2.6581440E+02 -2.6537966E+02 -2.6494446E+02
 -2.6450883E+02 -2.6407275E+02 -2.6363624E+02 -2.6319930E+02
 -2.6276193E+02 -2.6232414E+02 -2.6188593E+02 -2.6144731E+02
 -2.6100829E+02 -2.6056886E+02 -2.6012903E+02 -2.5968882E+02
 -2.5924821E+02 -2.5880722E+02 -2.5836585E+02 -2.5792411E+02
 -2.5748200E+02 -2.5703953E+02 -2.5659669E+02 -2.5615350E+02
 -2.5570996E+02 -2.5526608E+02 -2.5482185E+02 -2.5437729E+02
 -2.5393240E+02 -2.5348718E+02 -2.5304164E+02 -2.5259579E+02
 -2.5214962E+02 -2.5170314E+02 -2.5125637E+02 -2.5080929E+02
 -2.5036192E+02 -2.4991427E+02 -2.4946633E+02 -2.4901811E+02
 -2.4856961E+02 -2.4812085E+02 -2.4767182E+02 -2.4722254E+02
 -2.4677300E+02 -2.4632320E+02 -2.4587317E+02 -2.4542289E+02
 -2.4497238E+02 -2.4452163E+02 -2.4407066E+02 -2.4361947E+02
 -2.4316806E+02 -2.4271643E+02 -2.4226460E+02 -2.4181257E+02
 -2.4136034E+02 -2.4090792E+02 -2.4045530E+02 -2.4000251E+02
 -2.3954953E+02 -2.3909638E+02 -2.3864306E+02 -2.3818958E+02
 -2.3773594E+02 -2.3728214E+02 -2.3682819E+02 -2.3637410E+02
 -2.3591986E+02 -2.3546549E+02 -2.3501098E+02 -2.3455635E+02
 -2.3410160E+02 -2.3364673E+02 -2.3319175E+02 -2.3273666E+02
 -2.3228147E+02 -2.3182618E+02 -2.3137080E+02 -2.3091532E+02
 -2.3045977E+02 -2.3000413E+02 -2.2954842E+02 -2.2909264E+02
 -2.2863680E+02 -2.2818089E+02 -2.2772493E+02 -2.2726892E+02
 -2.2681286E+02 -2.2635676E+02 -2.2590063E+02 -2.2544446E+02
 -2.2498827E+02 -2.2453205E+02 -2.2407582E+02 -2.2361958E+02
 -2.2316332E+02 -2.2270707E+02 -2.2225081E+02 -2.2179456E+02
 -2.2133832E+02 -2.2088210E+02 -2.2042590E+02 -2.1996973E+02
 -2.1951358E+02 -2.1905747E+02 -2.1860140E+02 -2.1814537E+02
 -2.1768939E+02 -2.1723347E+02 -2.1677760E+02 -2.1632180E+02
 -2.1586607E+02 -2.1541041E+02 -2.1495482E+02 -2.1449932E+02
 -2.1404391E+02 -2.1358859E+02 -2.1313336E+02 -2.1267824E+02
 -2.1222322E+02 -2.1176831E+02 -2.1131352E+02 -2.1085885E+02
 -2.1040430E+02 -2.0994988E+02 -2.0949560E+02 -2.0904146E+02
 -2.0858746E+02 -2.0813361E+02 -2.0767992E+02 -2.0722638E+02
 -2.0677301E+02 -2.0631980E+02 -2.0586677E+02 -2.0541391E+02
 -2.0496123E+02 -2.0450875E+02 -2.0405645E+02 -2.0360435E+02
 -2.0315245E+02 -2.0270076E+02 -2.0224928E+02 -2.0179801E+02
 -2.0134697E+02 -2.0089615E+02 -2.0044555E+02 -1.9999520E+02
 -1.9954508E+02 -1.9909520E+02 -1.9864558E+02 -1.9819621E+02
 -1.9774709E+02 -1.9729824E+02 -1.9684966E+02 -1.9640135E+02
 -1.9595331E+02 -1.9550556E+02 -1.9505809E+02 -1.9461092E+02
 -1.9416404E+02 -1.9371747E+02 -1.9327119E+02 -1.9282523E+02
 -1.9237959E+02 -1.9193426E+02 -1.9148926E+02 -1.9104459E+02
 -1.9060025E+02 -1.9015625E+02 -1.8971260E+02 -1.8926929E+02
 -1.8882634E+02 -1.8838374E+02 -1.8794151E+02 -1.8749964E+02
 -1.8705815E+02 -1.8661703E+02 -1.8617630E+02 -1.8573595E+02
 -1.8529599E+02 -1.8485643E+02 -1.8441727E+02 -1.8397852E+02
 -1.8354017E+02 -1.8310224E+02 -1.8266473E+02 -1.8222765E+02
 -1.8179099E+02 -1.8135477E+02 -1.8091898E+02 -1.8048364E+02
 -1.8004875E+02 -1.7961431E+02 -1.7918033E+02 -1.7874681E+02
 -1.7831376E+02 -1.7788118E+02 -1.7744907E+02 -1.7701745E+02
 -1.7658632E+02 -1.7615567E+02 -1.7572552E+02 -1.7529587E+02
 -1.7486673E+02 -1.7443810E+02 -1.7400998E+02 -1.7358238E+02
 -1.7315530E+02 -1.7272876E+02 -1.7230275E+02 -1.7187727E+02
 -1.7145234E+02 -1.7102796E+02 -1.7060413E+02 -1.7018085E+02
 -1.6975814E+02 -1.6933600E+02 -1.6891443E+02 -1.6849343E+02
 -1.6807302E+02 -1.6765319E+02 -1.6723395E+02 -1.6681531E+02
 -1.6639727E+02 -1.6597983E+02 -1.6556301E+02 -1.6514680E+02
 -1.6473120E+02 -1.6431623E+02 -1.6390189E+02 -1.6348819E+02
 -1.6307512E+02 -1.6266269E+02 -1.6225091E+02 -1.6183979E+02
 -1.6142932E+02 -1.6101951E+02 -1.6061037E+02 -1.6020191E+02
 -1.5979411E+02 -1.5938700E+02 -1.5898058E+02 -1.5857484E+02
 -1.5816980E+02 -1.5776547E+02 -1.5736183E+02 -1.5695891E+02
 -1.5655669E+02 -1.5615520E+02 -1.5575444E+02 -1.5535440E+02
 -1.5495509E+02 -1.5455652E+02 -1.5415870E+02 -1.5376162E+02
 -1.5336529E+02 -1.5296972E+02 -1.5257492E+02 -1.5218088E+02
 -1.5178761E+02 -1.5139511E+02 -1.5100340E+02 -1.5061248E+02
 -1.5022234E+02 -1.4983300E+02 -1.4944446E+02 -1.4905672E+02
 -1.4866979E+02 -1.4828368E+02 -1.4789838E+02 -1.4751391E+02
 -1.4713027E+02 -1.4674746E+02 -1.4636548E+02 -1.4598435E+02
 -1.4560407E+02 -1.4522464E+02 -1.4484607E+02 -1.4446836E+02
 -1.4409151E+02 -1.4371554E+02 -1.4334044E+02 -1.4296622E+02
 -1.4259288E+02 -1.4222044E+02 -1.4184889E+02 -1.4147824E+02
 -1.4110850E+02 -1.4073966E+02 -1.4037174E+02 -1.4000474E+02
 -1.3963866E+02 -1.3927351E+02 -1.3890929E+02 -1.3854601E+02
 -1.3818367E+02 -1.3782228E+02 -1.3746184E+02 -1.3710235E+02
 -1.3674383E+02 -1.3638628E+02 -1.3602969E+02 -1.3567408E+02
 -1.3531945E+02 -1.3496581E+02 -1.3461315E+02 -1.3426149E+02
 -1.3391083E+02 -1.3356117E+02 -1.3321253E+02 -1.3286489E+02
 -1.3251828E+02 -1.3217268E+02 -1.3182812E+02 -1.3148459E+02
 -1.3114584E+02 -1.3080439E+02 -1.3046397E+02 -1.3012459E+02
 -1.2978624E+02 -1.2944891E+02 -1.2911261E+02 -1.2877732E+02
 -1.2844305E+02 -1.2810980E+02 -1.2777755E+02 -1.2744630E+02
 -1.2711606E+02 -1.2678682E+02 -1.2645857E+02 -1.2613131E+02
 -1.2580503E+02 -1.2547975E+02 -1.2515544E+02 -1.2483211E+02
 -1.2450976E+02 -1.2418837E+02 -1.2386795E+02 -1.2354850E+02
 -1.2323001E+02 -1.2291247E+02 -1.2259589E+02 -1.2228026E+02
 -1.2196558E+02 -1.2165184E+02 -1.2133905E+02 -1.2102719E+02
 -1.2071626E+02 -1.2040627E+02 -1.2009721E+02 -1.1978907E+02
 -1.1948185E+02 -1.1917555E+02 -1.1887017E+02 -1.1856570E+02
 -1.1826214E+02 -1.1795949E+02 -1.1765774E+02 -1.1735689E+02
 -1.1705693E+02 -1.1675787E+02 -1.1645970E+02 -1.1616242E+02
 -1.1586603E+02 -1.1557051E+02 -1.1527588E+02 -1.1498212E+02
 -1.1468924E+02 -1.1439722E+02 -1.1410607E+02 -1.1381579E+02
 -1.1352636E+02 -1.1323780E+02 -1.1295009E+02 -1.1266323E+02
 -1.1237722E+02 -1.1209206E+02 -1.1180775E+02 -1.1152427E+02
 -1.1124163E+02 -1.1095983E+02 -1.1067886E+02 -1.1039872E+02
 -1.1011941E+02 -1.0984092E+02 -1.0956325E+02 -1.0928640E+02
 -1.0901036E+02 -1.0873514E+02 -1.0846073E+02 -1.0818713E+02
 -1.0791433E+02 -1.0764234E+02 -1.0737114E+02 -1.0710074E+02
 -1.0683114E+02 -1.0656232E+02 -1.0629430E+02 -1.0602706E+02
 -1.0576060E+02 -1.0549493E+02 -1.0523003E+02 -1.0496591E+02
 -1.0470257E+02 -1.0443999E+02 -1.0417818E+02 -1.0391714E+02
 -1.0365686E+02 -1.0339734E+02 -1.0313857E+02 -1.0288056E+02
 -1.0262331E+02 -1.0236681E+02 -1.0211105E+02 -1.0185604E+02
 -1.0160177E+02 -1.0134824E+02 -1.0109545E+02 -1.0084339E+02
 -1.0059207E+02 -1.0034148E+02 -1.0009161E+02 -9.9842472E+01
 -9.9594057E+01 -9.9346362E+01 -9.9099385E+01 -9.8853125E+01
 -9.8607578E+01 -9.8362742E+01 -9.8118615E+01 -9.7875195E+01
 -9.7632480E+01 -9.7390466E+01 -9.7149151E+01 -9.6908534E+01
 -9.6668612E+01 -9.6429383E+01 -9.6190844E+01 -9.5952994E+01
 -9.5715829E+01 -9.5479348E+01 -9.5243548E+01 -9.5008427E+01
 -9.4773983E+01 -9.4540214E+01 -9.4307117E+01 -9.4074690E+01
 -9.3842932E+01 -9.3611839E+01 -9.3381410E+01 -9.3151643E+01
 -9.2922534E+01 -9.2694083E+01 -9.2466287E+01 -9.2239144E+01
 -9.2012651E+01 -9.1786807E+01 -9.1561610E+01 -9.1337057E+01
 -9.1113146E+01 -9.0889875E+01 -9.0667242E+01 -9.0445245E+01
 -9.0223882E+01 -9.0003151E+01 -8.9783050E+01 -8.9563576E+01
 -8.9344728E+01 -8.9126504E+01 -8.8908901E+01 -8.8691918E+01
 -8.8475552E+01 -8.8259802E+01 -8.8044666E+01 -8.7830141E+01
 -8.7616225E+01 -8.7402918E+01 -8.7190215E+01 -8.6978117E+01
 -8.6766620E+01 -8.6555723E+01 -8.6345424E+01 -8.6135720E+01
 -8.5926611E+01 -8.5718093E+01 -8.5510166E+01 -8.5302827E+01
 -8.5096074E+01 -8.4889905E+01 -8.4684320E+01 -8.4479314E+01
 -8.4274888E+01 -8.4071038E+01 -8.3867763E+01 -8.3665062E+01
 -8.3462932E+01 -8.3261371E+01 -8.3060378E+01 -8.2859951E+01
 -8.2660088E+01 -8.2460787E+01 -8.2262047E+01 -8.2063865E+01
 -8.1866240E+01 -8.1669169E+01 -8.1472653E+01 -8.1276687E+01
 -8.1081272E+01 -8.0886404E+01 -8.0692082E+01 -8.0498305E+01
 -8.0305070E+01 -8.0112377E+01 -7.9920223E+01 -7.9728606E+01
 -7.9537525E+01 -7.9346978E+01 -7.9156963E+01 -7.8967479E+01
 -7.8778524E+01 -7.8590096E+01 -7.8402194E+01 -7.8214816E+01
 -7.8027960E+01 -7.7841625E+01 -7.7655808E+01 -7.7470509E+01
 -7.7285726E+01 -7.7101456E+01 -7.6917699E+01 -7.6734453E+01
 -7.6551716E+01 -7.6369486E+01 -7.6187762E+01 -7.6006542E+01
 -7.5825826E+01 -7.5645610E+01 -7.5465894E+01 -7.5286675E+01
 -7.5107953E+01 -7.4929726E+01 -7.4751992E+01 -7.4574750E+01
 -7.4397997E+01 -7.4221734E+01 -7.4045957E+01 -7.3870666E+01
 -7.3695859E+01 -7.3521534E+01 -7.3347690E+01 -7.3174325E+01
 -7.3001439E+01 -7.2829028E+01 -7.2657093E+01 -7.2485631E+01
 -7.2314640E+01 -7.2144121E+01 -7.1974070E+01 -7.1804486E+01
 -7.1635369E+01 -7.1466716E+01 -7.1298526E+01 -7.1130798E+01
 -7.0963530E+01 -7.0796720E+01 -7.0630368E+01 -7.0464472E+01
 -7.0299030E+01 -7.0134041E+01 -6.9969504E+01 -6.9805417E+01
 -6.9641779E+01 -6.9478588E+01 -6.9315843E+01 -6.9153542E+01
 -6.8991685E+01 -6.8830269E+01 -6.8669294E+01 -6.8508758E+01
 -6.8348660E+01 -6.8188998E+01 -6.8029771E+01 -6.7870978E+01
 -6.7712617E+01 -6.7554686E+01 -6.7397186E+01 -6.7240113E+01
 -6.7083468E+01 -6.6927248E+01 -6.6771452E+01 -6.6616079E+01
 -6.6461128E+01 -6.6306598E+01 -6.6152486E+01 -6.5998792E+01
 -6.5845514E+01 -6.5692652E+01 -6.5540203E+01 -6.5388167E+01
 -6.5236543E+01 -6.5085328E+01 -6.4934522E+01 -6.4784124E+01
 -6.4634132E+01 -6.4484545E+01 -6.4335361E+01 -6.4186580E+01
 -6.4038201E+01 -6.3890221E+01 -6.3742640E+01 -6.3595457E+01
 -6.3448670E+01 -6.3302278E+01 -6.3156280E+01 -6.3010675E+01
 -6.2865462E+01 -6.2720638E+01 -6.2576204E+01 -6.2432157E+01
 -6.2288498E+01 -6.2145223E+01 -6.2002333E+01 -6.1859827E+01
 -6.1717702E+01 -6.1575958E+01 -6.1434594E+01 -6.1293608E+01
 -6.1152999E+01 -6.1012767E+01 -6.0872910E+01 -6.0733426E+01
 -6.0594316E+01 -6.0455577E+01 -6.0317208E+01 -6.0179209E+01
 -6.0041578E+01 -5.9904314E+01 -5.9767416E+01 -5.9630883E+01
 -5.9494713E+01 -5.9358906E+01 -5.9223461E+01 -5.9088376E+01
 -5.8953651E+01 -5.8819284E+01 -5.8685274E+01 -5.8551620E+01
 -5.8418321E+01 -5.8285375E+01 -5.8152783E+01 -5.8020543E+01
 -5.7888653E+01 -5.7757113E+01 -5.7625921E+01 -5.7495077E+01
 -5.7364580E+01 -5.7234427E+01 -5.7104620E+01 -5.6975155E+01
 -5.6846033E+01 -5.6717252E+01 -5.6588812E+01 -5.6460710E+01
 -5.6332947E+01 -5.6205521E+01 -5.6078431E+01 -5.5951676E+01
 -5.5825256E+01 -5.5699168E+01 -5.5573413E+01 -5.5447989E+01
 -5.5322895E+01 -5.5198130E+01 -5.5073693E+01 -5.4949583E+01
 -5.4825800E+01 -5.4702341E+01 -5.4579207E+01 -5.4456396E+01
 -5.4333908E+01 -5.4211741E+01 -5.4089894E+01 -5.3968366E+01
 -5.3847157E+01 -5.3726265E+01 -5.3605690E+01 -5.3485431E+01
 -5.3365486E+01 -5.3245855E+01 -5.3126536E+01 -5.3007530E+01
 -5.2888834E+01 -5.2770449E+01 -5.2652372E+01 -5.2534603E+01
 -5.2417142E+01 -5.2299987E+01 -5.2183137E+01 -5.2066592E+01
 -5.1950350E+01 -5.1834411E+01 -5.1718774E+01 -5.1603438E+01
 -5.1488401E+01 -5.1373664E+01 -5.1259225E+01 -5.1145083E+01
 -5.1031238E+01 -5.0917688E+01 -5.0804433E+01 -5.0691471E+01
 -5.0578803E+01 -5.0466426E+01 -5.0354341E+01 -5.0242546E+01
 -5.0131040E+01 -5.0019823E+01 -4.9908894E+01 -4.9798252E+01
 -4.9687896E+01 -4.9577825E+01 -4.9468038E+01 -4.9358535E+01
 -4.9249315E+01 -4.9140376E+01 -4.9031719E+01 -4.8923341E+01
 -4.8815243E+01 -4.8707424E+01 -4.8599882E+01 -4.8492618E+01
 -4.8385629E+01 -4.8278916E+01 -4.8172477E+01 -4.8066312E+01
 -4.7960419E+01 -4.7854799E+01 -4.7749450E+01 -4.7644371E+01
 -4.7539563E+01 -4.7435023E+01 -4.7330751E+01 -4.7226746E+01
 -4.7123008E+01 -4.7019536E+01 -4.6916329E+01 -4.6813386E+01
 -4.6710706E+01 -4.6608289E+01 -4.6506134E+01 -4.6404240E+01
 -4.6302606E+01 -4.6201232E+01 -4.6100117E+01 -4.5999260E+01
 -4.5898660E+01 -4.5798317E+01 -4.5698230E+01 -4.5598397E+01
 -4.5498820E+01 -4.5399495E+01 -4.5300424E+01 -4.5201605E+01
 -4.5103037E+01 -4.5004719E+01 -4.4906652E+01 -4.4808834E+01
 -4.4711265E+01 -4.4613943E+01 -4.4516868E+01 -4.4420040E+01
 -4.4323457E+01 -4.4227119E+01 -4.4131025E+01 -4.4035175E+01
 -4.3939568E+01 -4.3844203E+01 -4.3749079E+01 -4.3654196E+01
 -4.3559552E+01 -4.3465148E+01 -4.3370983E+01 -4.3277056E+01
 -4.3183366E+01 -4.3089912E+01 -4.2996694E+01 -4.2903712E+01
 -4.2810964E+01 -4.2718450E+01 -4.2626168E+01 -4.2534120E+01
 -4.2442303E+01 -4.2350718E+01 -4.2259362E+01 -4.2168237E+01
 -4.2077341E+01 -4.1986673E+01 -4.1896234E+01 -4.1806021E+01
 -4.1716035E+01 -4.1626275E+01 -4.1536740E+01 -4.1447430E+01
 -4.1358344E+01 -4.1269481E+01 -4.1180840E+01 -4.1092422E+01
 -4.1004225E+01 -4.0916249E+01 -4.0828493E+01 -4.0740956E+01
 -4.0653639E+01 -4.0566539E+01 -4.0479658E+01 -4.0392993E+01
 -4.0306545E+01 -4.0220312E+01 -4.0134295E+01 -4.0048492E+01
 -3.9962903E+01 -3.9877527E+01 -3.9792364E+01 -3.9707414E+01
 -3.9622674E+01 -3.9538146E+01 -3.9453828E+01 -3.9369720E+01
 -3.9285821E+01 -3.9202130E+01 -3.9118647E+01 -3.9035372E+01
 -3.8952303E+01 -3.8869440E+01 -3.8786784E+01 -3.8704332E+01
 -3.8622084E+01 -3.8540040E+01 -3.8458200E+01 -3.8376562E+01
 -3.8295127E+01 -3.8213892E+01 -3.8132859E+01 -3.8052027E+01
 -3.7971394E+01 -3.7890960E+01 -3.7810725E+01 -3.7730688E+01
 -3.7650849E+01 -3.7571207E+01 -3.7491761E+01 -3.7412511E+01
 -3.7333457E+01 -3.7254597E+01 -3.7175932E+01 -3.7097461E+01
 -3.7019182E+01 -3.6941096E+01 -3.6863203E+01 -3.6785500E+01
 -3.6707989E+01 -3.6630669E+01 -3.6553538E+01 -3.6476597E+01
 -3.6399844E+01 -3.6323280E+01 -3.6246904E+01 -3.6170715E+01
 -3.6094713E+01 -3.6018897E+01 -3.5943267E+01 -3.5867822E+01
 -3.5792561E+01 -3.5717485E+01 -3.5642593E+01 -3.5567884E+01
 -3.5493357E+01 -3.5419012E+01 -3.5344849E+01 -3.5270867E+01
 -3.5197066E+01 -3.5123445E+01 -3.5050003E+01 -3.4976741E+01
 -3.4903657E+01 -3.4830751E+01 -3.4758023E+01 -3.4685472E+01
 -3.4613098E+01 -3.4540899E+01 -3.4468876E+01 -3.4397029E+01
 -3.4325356E+01 -3.4253857E+01 -3.4182532E+01 -3.4111380E+01
 -3.4040401E+01 -3.3969595E+01 -3.3898959E+01 -3.3828496E+01
 -3.3758203E+01 -3.3688080E+01 -3.3618127E+01 -3.3548344E+01
 -3.3478730E+01 -3.3409284E+01 -3.3340006E+01 -3.3270895E+01
 -3.3201952E+01 -3.3133176E+01 -3.3064565E+01 -3.2996120E+01
 -3.2927841E+01 -3.2859726E+01 -3.2791775E+01 -3.2723989E+01
 -3.2656366E+01 -3.2588905E+01 -3.2521608E+01 -3.2454472E+01
 -3.2387498E+01 -3.2320685E+01 -3.2254033E+01 -3.2187542E+01
 -3.2121210E+01 -3.2055037E+01 -3.1989024E+01 -3.1923169E+01
 -3.1857472E+01 -3.1791933E+01 -3.1726551E+01 -3.1661326E+01
 -3.1596258E+01 -3.1531345E+01 -3.1466588E+01 -3.1401986E+01
 -3.1337538E+01 -3.1273245E+01 -3.1209106E+01 -3.1145120E+01
 -3.1081287E+01 -3.1017607E+01 -3.0954079E+01 -3.0890703E+01
 -3.0827478E+01 -3.0764404E+01 -3.0701480E+01 -3.0638706E+01
 -3.0576083E+01 -3.0513608E+01 -3.0451282E+01 -3.0389105E+01
 -3.0327076E+01 -3.0265195E+01 -3.0203461E+01 -3.0141873E+01
 -3.0080432E+01 -3.0019138E+01 -2.9957988E+01 -2.9896985E+01
 -2.9836126E+01 -2.9775411E+01 -2.9714841E+01 -2.9654414E+01
 -2.9594131E+01 -2.9533990E+01 -2.9473992E+01 -2.9414136E+01
 -2.9354422E+01 -2.9294850E+01 -2.9235418E+01 -2.9176127E+01
 -2.9116976E+01 -2.9057965E+01 -2.8999094E+01 -2.8940362E+01
 -2.8881768E+01 -2.8823313E+01 -2.8764996E+01 -2.8706816E+01
 -2.8648774E+01 -2.8590868E+01 -2.8533099E+01 -2.8475466E+01
 -2.8417969E+01 -2.8360607E+01 -2.8303381E+01 -2.8246289E+01
 -2.8189331E+01 -2.8132507E+01 -2.8075817E+01 -2.8019260E+01
 -2.7962836E+01 -2.7906544E+01 -2.7850385E+01 -2.7794357E+01
 -2.7738461E+01 -2.7682696E+01 -2.7627062E+01 -2.7571558E+01
 -2.7516184E+01 -2.7460940E+01 -2.7405825E+01 -2.7350840E+01
 -2.7295983E+01 -2.7241254E+01 -2.7186653E+01 -2.7132180E+01
 -2.7077834E+01 -2.7023615E+01 -2.6969523E+01 -2.6915557E+01
 -2.6861717E+01 -2.6808002E+01 -2.6754413E+01 -2.6700949E+01
 -2.6647609E+01 -2.6594394E+01 -2.6541302E+01 -2.6488334E+01
 -2.6435490E+01 -2.6382768E+01 -2.6330169E+01 -2.6277693E+01
 -2.6225338E+01 -2.6173105E+01 -2.6120993E+01 -2.6069003E+01
 -2.6017133E+01 -2.5965383E+01 -2.5913753E+01 -2.5862244E+01
 -2.5810853E+01 -2.5759582E+01 -2.5708429E+01 -2.5657395E+01
 -2.5606479E+01 -2.5555681E+01 -2.5505001E+01 -2.5454437E+01
 -2.5403991E+01 -2.5353661E+01 -2.5303447E+01 -2.5253350E+01
 -2.5203368E+01 -2.5153502E+01 -2.5103750E+01 -2.5054113E+01
 -2.5004591E+01 -2.4955183E+01 -2.4905889E+01 -2.4856708E+01
 -2.4807641E+01 -2.4758687E+01 -2.4709845E+01 -2.4661116E+01
 -2.4612498E+01 -2.4563993E+01 -2.4515599E+01 -2.4467316E+01
 -2.4419144E+01 -2.4371083E+01 -2.4323132E+01 -2.4275291E+01
 -2.4227560E+01 -2.4179938E+01 -2.4132426E+01 -2.4085022E+01
 -2.4037727E+01 -2.3990540E+01 -2.3943461E+01 -2.3896490E+01
 -2.3849627E+01 -2.3802871E+01 -2.3756221E+01 -2.3709678E+01
 -2.3663242E+01 -2.3616912E+01 -2.3570687E+01 -2.3524568E+01
 -2.3478554E+01 -2.3432645E+01 -2.3386841E+01 -2.3341141E+01
 -2.3295546E+01 -2.3250054E+01 -2.3204666E+01 -2.3159381E+01
 -2.3114200E+01 -2.3069121E+01 -2.3024144E+01 -2.2979270E+01
 -2.2934498E+01 -2.2889828E+01 -2.2845259E+01 -2.2800791E+01
 -2.2756425E+01 -2.2712159E+01 -2.2667993E+01 -2.2623928E+01
 -2.2579962E+01 -2.2536096E+01 -2.2492330E+01 -2.2448663E+01
 -2.2405094E+01 -2.2361624E+01 -2.2318253E+01 -2.2274979E+01
 -2.2231804E+01 -2.2188726E+01 -2.2145745E+01 -2.2102862E+01
 -2.2060075E+01 -2.2017385E+01 -2.1974792E+01 -2.1932294E+01
 -2.1889892E+01 -2.1847586E+01 -2.1805375E+01 -2.1763260E+01
 -2.1721239E+01 -2.1679313E+01 -2.1637481E+01 -2.1595744E+01
 -2.1554100E+01 -2.1512550E+01 -2.1471093E+01 -2.1429730E+01
 -2.1388459E+01 -2.1347281E+01 -2.1306196E+01 -2.1265203E+01
 -2.1224302E+01 -2.1183492E+01 -2.1142774E+01 -2.1102148E+01
 -2.1061612E+01 -2.1021167E+01 -2.0980813E+01 -2.0940549E+01
 -2.0900376E+01 -2.0860292E+01 -2.0820298E+01 -2.0780393E+01
 -2.0740577E+01 -2.0700851E+01 -2.0661213E+01 -2.0621664E+01
 -2.0582203E+01 -2.0542830E+01 -2.0503545E+01 -2.0464347E+01
 -2.0425237E+01 -2.0386214E+01 -2.0347278E+01 -2.0308429E+01
 -2.0269667E+01 -2.0230990E+01 -2.0192400E+01 -2.0153895E+01
 -2.0115476E+01 -2.0077143E+01 -2.0038895E+01 -2.0000731E+01
 -1.9962653E+01 -1.9924659E+01 -1.9886749E+01 -1.9848924E+01
 -1.9811182E+01 -1.9773525E+01 -1.9735950E+01 -1.9698459E+01
 -1.9661051E+01 -1.9623726E+01 -1.9586483E+01 -1.9549323E+01
 -1.9512245E+01 -1.9475249E+01 -1.9438335E+01 -1.9401503E+01
 -1.9364752E+01 -1.9328082E+01 -1.9291493E+01 -1.9254985E+01
 -1.9218557E+01 -1.9182210E+01 -1.9145943E+01 -1.9109756E+01
 -1.9073649E+01 -1.9037621E+01 -1.9001673E+01 -1.8965804E+01
 -1.8930014E+01 -1.8894303E+01 -1.8858670E+01 -1.8823115E+01
 -1.8787639E+01 -1.8752241E+01 -1.8716920E+01 -1.8681677E+01
 -1.8646512E+01 -1.8611424E+01 -1.8576412E+01 -1.8541478E+01
 -1.8506620E+01 -1.8471839E+01 -1.8437133E+01 -1.8402504E+01
 -1.8367951E+01 -1.8333473E+01 -1.8299071E+01 -1.8264744E+01
 -1.8230493E+01 -1.8196316E+01 -1.8162214E+01 -1.8128186E+01
 -1.8094233E+01 -1.8060354E+01 -1.8026549E+01 -1.7992818E+01
 -1.7959160E+01 -1.7925576E+01 -1.7892065E+01 -1.7858627E+01
 -1.7825262E+01 -1.7791970E+01 -1.7758750E+01 -1.7725602E+01
 -1.7692527E+01 -1.7659524E+01 -1.7626592E+01 -1.7593732E+01
 -1.7560944E+01 -1.7528227E+01 -1.7495581E+01 -1.7463006E+01
 -1.7430501E+01 -1.7398067E+01 -1.7365704E+01 -1.7333411E+01
 -1.7301187E+01 -1.7269034E+01 -1.7236950E+01 -1.7204936E+01
 -1.7172991E+01 -1.7141116E+01 -1.7109309E+01 -1.7077571E+01
 -1.7045902E+01 -1.7014302E+01 -1.6982769E+01 -1.6951305E+01
 -1.6919909E+01 -1.6888581E+01 -1.6857320E+01 -1.6826127E+01
 -1.6795001E+01 -1.6763942E+01 -1.6732951E+01 -1.6702026E+01
 -1.6671167E+01 -1.6640376E+01 -1.6609650E+01 -1.6578991E+01
 -1.6548398E+01 -1.6517870E+01 -1.6487409E+01 -1.6457013E+01
 -1.6426682E+01 -1.6396416E+01 -1.6366215E+01 -1.6336080E+01
 -1.6306009E+01 -1.6276002E+01 -1.6246060E+01 -1.6216182E+01
 -1.6186369E+01 -1.6156619E+01 -1.6126933E+01 -1.6097310E+01
 -1.6067752E+01 -1.6038256E+01 -1.6008823E+01 -1.5979454E+01
 -1.5950147E+01 -1.5920903E+01 -1.5891722E+01 -1.5862603E+01
 -1.5833546E+01 -1.5804551E+01 -1.5775619E+01 -1.5746747E+01
 -1.5717938E+01 -1.5689190E+01 -1.5660504E+01 -1.5631878E+01
 -1.5603314E+01 -1.5574810E+01 -1.5546367E+01 -1.5517985E+01
 -1.5489663E+01 -1.5461402E+01 -1.5433200E+01 -1.5405059E+01
 -1.5376978E+01 -1.5348956E+01 -1.5320993E+01 -1.5293091E+01
 -1.5265247E+01 -1.5237463E+01 -1.5209737E+01 -1.5182070E+01
 -1.5154463E+01 -1.5126913E+01 -1.5099422E+01 -1.5071989E+01
 -1.5044615E+01 -1.5017298E+01 -1.4990040E+01 -1.4962839E+01
 -1.4935695E+01 -1.4908609E+01 -1.4881580E+01 -1.4854609E+01
 -1.4827694E+01 -1.4800836E+01 -1.4774035E+01 -1.4747291E+01
 -1.4720603E+01 -1.4693972E+01 -1.4667396E+01 -1.4640877E+01
 -1.4614414E+01 -1.4588006E+01 -1.4561654E+01 -1.4535358E+01
 -1.4509117E+01 -1.4482931E+01 -1.4456800E+01 -1.4430724E+01
 -1.4404704E+01 -1.4378737E+01 -1.4352826E+01 -1.4326969E+01
 -1.4301166E+01 -1.4275418E+01 -1.4249723E+01 -1.4224083E+01
 -1.4198496E+01 -1.4172963E+01 -1.4147483E+01 -1.4122057E+01
 -1.4096685E+01 -1.4071365E+01 -1.4046098E+01 -1.4020885E+01
 -1.3995724E+01 -1.3970616E+01 -1.3945560E+01 -1.3920557E+01
 -1.3895606E+01 -1.3870707E+01 -1.3845860E+01 -1.3821066E+01
 -1.3796322E+01 -1.3771631E+01 -1.3746991E+01 -1.3722403E+01
 -1.3697866E+01 -1.3673380E+01 -1.3648945E+01 -1.3624561E+01
 -1.3600228E+01 -1.3575945E+01 -1.3551713E+01 -1.3527532E+01
 -1.3503400E+01 -1.3479319E+01 -1.3455289E+01 -1.3431308E+01
 -1.3407377E+01 -1.3383495E+01 -1.3359664E+01 -1.3335881E+01
 -1.3312149E+01 -1.3288465E+01 -1.3264831E+01 -1.3241245E+01
 -1.3217709E+01 -1.3194221E+01 -1.3170782E+01 -1.3147391E+01
 -1.3124049E+01 -1.3100756E+01 -1.3077510E+01 -1.3054313E+01
 -1.3031164E+01 -1.3008062E+01 -1.2985008E+01 -1.2962002E+01
 -1.2939044E+01 -1.2916133E+01 -1.2893269E+01 -1.2870452E+01
 -1.2847683E+01 -1.2824960E+01 -1.2802285E+01 -1.2779656E+01
 -1.2757074E+01 -1.2734538E+01 -1.2712049E+01 -1.2689606E+01
 -1.2667209E+01 -1.2644859E+01 -1.2622554E+01 -1.2600295E+01
 -1.2578082E+01 -1.2555915E+01 -1.2533793E+01 -1.2511717E+01
 -1.2489686E+01 -1.2467700E+01 -1.2445760E+01 -1.2423864E+01
 -1.2402014E+01 -1.2380208E+01 -1.2358447E+01 -1.2336731E+01
 -1.2315059E+01 -1.2293431E+01 -1.2271848E+01 -1.2250309E+01
 -1.2228814E+01 -1.2207363E+01 -1.2185956E+01 -1.2164593E+01
 -1.2143273E+01 -1.2121998E+01 -1.2100765E+01 -1.2079576E+01
 -1.2058430E+01 -1.2037327E+01 -1.2016268E+01 -1.1995251E+01
 -1.1974277E+01 -1.1953346E+01 -1.1932458E+01 -1.1911612E+01
 -1.1890809E+01 -1.1870048E+01 -1.1849329E+01 -1.1828653E+01
 -1.1808019E+01 -1.1787426E+01 -1.1766876E+01 -1.1746367E+01
 -1.1725900E+01 -1.1705475E+01 -1.1685091E+01 -1.1664748E+01
 -1.1644447E+01 -1.1624187E+01 -1.1603968E+01 -1.1583790E+01
 -1.1563653E+01 -1.1543557E+01 -1.1523502E+01 -1.1503487E+01
 -1.1483513E+01 -1.1463579E+01 -1.1443685E+01 -1.1423832E+01
 -1.1404019E+01 -1.1384246E+01 -1.1364514E+01 -1.1344821E+01
 -1.1325167E+01 -1.1305554E+01 -1.1285980E+01 -1.1266446E+01
 -1.1246951E+01 -1.1227495E+01 -1.1208079E+01 -1.1188702E+01
 -1.1169363E+01 -1.1150064E+01 -1.1130804E+01 -1.1111583E+01
 -1.1092400E+01 -1.1073256E+01 -1.1054150E+01 -1.1035083E+01
 -1.1016055E+01 -1.0997064E+01 -1.0978112E+01 -1.0959198E+01
 -1.0940321E+01 -1.0921483E+01 -1.0902683E+01 -1.0883920E+01
 -1.0865195E+01 -1.0846508E+01 -1.0827858E+01 -1.0809245E+01
 -1.0790670E+01 -1.0772132E+01 -1.0753631E+01 -1.0735167E+01
 -1.0716740E+01 -1.0698350E+01 -1.0679997E+01 -1.0661681E+01
 -1.0643401E+01 -1.0625158E+01 -1.0606951E+01 -1.0588781E+01
 -1.0570647E+01 -1.0552549E+01 -1.0534487E+01 -1.0516462E+01
 -1.0498472E+01 -1.0480518E+01 -1.0462600E+01 -1.0444718E+01
 -1.0426871E+01 -1.0409060E+01 -1.0391285E+01 -1.0373545E+01
 -1.0355840E+01 -1.0338170E+01 -1.0320536E+01 -1.0302937E+01
 -1.0285372E+01 -1.0267843E+01 -1.0250348E+01 -1.0232888E+01
 -1.0215463E+01 -1.0198073E+01 -1.0180717E+01 -1.0163395E+01
 -1.0146108E+01 -1.0128855E+01 -1.0111637E+01 -1.0094452E+01
 -1.0077302E+01 -1.0060186E+01 -1.0043103E+01 -1.0026054E+01
 -1.0009039E+01 -9.9920581E+00 -9.9751104E+00 -9.9581963E+00
 -9.9413156E+00 -9.9244683E+00 -9.9076543E+00 -9.8908735E+00
 -9.8741259E+00 -9.8574114E+00 -9.8407298E+00 -9.8240812E+00
 -9.8074654E+00 -9.7908824E+00 -9.7743321E+00 -9.7578144E+00
 -9.7413293E+00 -9.7248767E+00 -9.7084565E+00 -9.6920686E+00
 -9.6757130E+00 -9.6593895E+00 -9.6430982E+00 -9.6268390E+00
 -9.6106117E+00 -9.5944163E+00 -9.5782528E+00 -9.5621210E+00
 -9.5460209E+00 -9.5299524E+00 -9.5139155E+00 -9.4979100E+00
 -9.4819359E+00 -9.4659932E+00 -9.4500818E+00 -9.4342015E+00
 -9.4183524E+00 -9.4025343E+00 -9.3867472E+00 -9.3709910E+00
 -9.3552657E+00 -9.3395711E+00 -9.3239073E+00 -9.3082740E+00
 -9.2926714E+00 -9.2770993E+00 -9.2615576E+00 -9.2460463E+00
 -9.2305652E+00 -9.2151144E+00 -9.1996938E+00 -9.1843033E+00
 -9.1689428E+00 -9.1536122E+00 -9.1383116E+00 -9.1230408E+00
 -9.1077997E+00 -9.0925884E+00 -9.0774066E+00 -9.0622545E+00
 -9.0471318E+00 -9.0320386E+00 -9.0169747E+00 -9.0019402E+00
 -8.9869349E+00 -8.9719587E+00 -8.9570117E+00 -8.9420937E+00
 -8.9272047E+00 -8.9123446E+00 -8.8975134E+00 -8.8827109E+00
 -8.8679372E+00 -8.8531921E+00 -8.8384756E+00 -8.8237877E+00
 -8.8091282E+00 -8.7944971E+00 -8.7798944E+00 -8.7653199E+00
 -8.7507737E+00 -8.7362556E+00 -8.7217656E+00 -8.7073037E+00
 -8.6928697E+00 -8.6784636E+00 -8.6640854E+00 -8.6497349E+00
 -8.6354122E+00 -8.6211171E+00 -8.6068497E+00 -8.5926097E+00
 -8.5783973E+00 -8.5642123E+00 -8.5500546E+00 -8.5359242E+00
 -8.5218211E+00 -8.5077451E+00 -8.4936963E+00 -8.4796745E+00
 -8.4656797E+00 -8.4517119E+00 -8.4377709E+00 -8.4238568E+00
 -8.4099694E+00 -8.3961087E+00 -8.3822747E+00 -8.3684672E+00
 -8.3546863E+00 -8.3409319E+00 -8.3272038E+00 -8.3135021E+00
 -8.2998267E+00 -8.2861776E+00 -8.2725546E+00 -8.2589577E+00
 -8.2453869E+00 -8.2318422E+00 -8.2183233E+00 -8.2048304E+00
 -8.1913633E+00 -8.1779220E+00 -8.1645064E+00 -8.1511165E+00
 -8.1377522E+00 -8.1244134E+00 -8.1111002E+00 -8.0978124E+00
 -8.0845499E+00 -8.0713129E+00 -8.0581011E+00 -8.0449145E+00
 -8.0317531E+00 -8.0186168E+00 -8.0055055E+00 -7.9924193E+00
 -7.9793580E+00 -7.9663216E+00 -7.9533101E+00 -7.9403233E+00
 -7.9273613E+00 -7.9144239E+00 -7.9015112E+00 -7.8886231E+00
 -7.8757594E+00 -7.8629203E+00 -7.8501055E+00 -7.8373151E+00
 -7.8245490E+00 -7.8118072E+00 -7.7990896E+00 -7.7863961E+00
 -7.7737267E+00 -7.7610814E+00 -7.7484600E+00 -7.7358626E+00
 -7.7232891E+00 -7.7107394E+00 -7.6982135E+00 -7.6857113E+00
 -7.6732328E+00 -7.6607780E+00 -7.6483467E+00 -7.6359389E+00
 -7.6235547E+00 -7.6111938E+00 -7.5988563E+00 -7.5865422E+00
 -7.5742513E+00 -7.5619837E+00 -7.5497392E+00 -7.5375179E+00
 -7.5253196E+00 -7.5131443E+00 -7.5009921E+00 -7.4888627E+00
 -7.4767562E+00 -7.4646726E+00 -7.4526117E+00 -7.4405736E+00
 -7.4285581E+00 -7.4165653E+00 -7.4045951E+00 -7.3926474E+00
 -7.3807221E+00 -7.3688193E+00 -7.3569389E+00 -7.3450809E+00
 -7.3332451E+00 -7.3214316E+00 -7.3096403E+00 -7.2978711E+00
 -7.2861240E+00 -7.2743990E+00 -7.2626960E+00 -7.2510149E+00
 -7.2393558E+00 -7.2277185E+00 -7.2161031E+00 -7.2045094E+00
 -7.1929374E+00 -7.1813871E+00 -7.1698585E+00 -7.1583514E+00
 -7.1468659E+00 -7.1354019E+00 -7.1239593E+00 -7.1125381E+00
 -7.1011383E+00 -7.0897598E+00 -7.0784026E+00 -7.0670666E+00
 -7.0557517E+00 -7.0444580E+00 -7.0331854E+00 -7.0219338E+00
 -7.0107032E+00 -6.9994935E+00 -6.9883048E+00 -6.9771369E+00
 -6.9659898E+00 -6.9548635E+00 -6.9437580E+00 -6.9326731E+00
 -6.9216088E+00 -6.9105652E+00 -6.8995421E+00 -6.8885395E+00
 -6.8775574E+00 -6.8665957E+00 -6.8556543E+00 -6.8447333E+00
 -6.8338326E+00 -6.8229522E+00 -6.8120919E+00 -6.8012518E+00
 -6.7904319E+00 -6.7796320E+00 -6.7688521E+00 -6.7580923E+00
 -6.7473524E+00 -6.7366324E+00 -6.7259322E+00 -6.7152519E+00
 -6.7045914E+00 -6.6939506E+00 -6.6833295E+00 -6.6727280E+00
 -6.6621462E+00 -6.6515839E+00 -6.6410412E+00 -6.6305180E+00
 -6.6200142E+00 -6.6095298E+00 -6.5990648E+00 -6.5886191E+00
 -6.5781927E+00 -6.5677855E+00 -6.5573976E+00 -6.5470288E+00
 -6.5366791E+00 -6.5263485E+00 -6.5160370E+00 -6.5057444E+00
 -6.4954709E+00 -6.4852162E+00 -6.4749804E+00 -6.4647635E+00
 -6.4545654E+00 -6.4443860E+00 -6.4342254E+00 -6.4240834E+00
 -6.4139601E+00 -6.4038554E+00 -6.3937693E+00 -6.3837017E+00
 -6.3736526E+00 -6.3636219E+00 -6.3536096E+00 -6.3436158E+00
 -6.3336402E+00 -6.3236830E+00 -6.3137440E+00 -6.3038232E+00
 -6.2939206E+00 -6.2840362E+00 -6.2741699E+00 -6.2643216E+00
 -6.2544913E+00 -6.2446791E+00 -6.2348848E+00 -6.2251084E+00
 -6.2153499E+00 -6.2056093E+00 -6.1958864E+00 -6.1861813E+00
 -6.1764940E+00 -6.1668243E+00 -6.1571723E+00 -6.1475380E+00
 -6.1379212E+00 -6.1283219E+00 -6.1187402E+00 -6.1091759E+00
 -6.0996291E+00 -6.0900997E+00 -6.0805876E+00 -6.0710929E+00
 -6.0616154E+00 -6.0521552E+00 -6.0427123E+00 -6.0332865E+00
 -6.0238779E+00 -6.0144863E+00 -6.0051119E+00 -5.9957545E+00
 -5.9864141E+00 -5.9770907E+00 -5.9677842E+00 -5.9584946E+00
 -5.9492219E+00 -5.9399660E+00 -5.9307269E+00 -5.9215046E+00
 -5.9122990E+00 -5.9031101E+00 -5.8939378E+00 -5.8847822E+00
 -5.8756432E+00 -5.8665207E+00 -5.8574147E+00 -5.8483252E+00
 -5.8392522E+00 -5.8301956E+00 -5.8211553E+00 -5.8121315E+00
 -5.8031239E+00 -5.7941326E+00 -5.7851576E+00 -5.7761988E+00
 -5.7672561E+00 -5.7583296E+00 -5.7494193E+00 -5.7405250E+00
 -5.7316467E+00 -5.7227845E+00 -5.7139383E+00 -5.7051080E+00
 -5.6962936E+00 -5.6874951E+00 -5.6787125E+00 -5.6699456E+00
 -5.6611946E+00 -5.6524593E+00 -5.6437397E+00 -5.6350359E+00
 -5.6263476E+00 -5.6176750E+00 -5.6090180E+00 -5.6003766E+00
 -5.5917507E+00 -5.5831403E+00 -5.5745453E+00 -5.5659658E+00
 -5.5574017E+00 -5.5488529E+00 -5.5403195E+00 -5.5318014E+00
 -5.5232986E+00 -5.5148110E+00 -5.5063386E+00 -5.4978814E+00
 -5.4894394E+00 -5.4810124E+00 -5.4726006E+00 -5.4642038E+00
 -5.4558221E+00 -5.4474553E+00 -5.4391035E+00 -5.4307667E+00
 -5.4224447E+00 -5.4141377E+00 -5.4058454E+00 -5.3975680E+00
 -5.3893054E+00 -5.3810575E+00 -5.3728243E+00 -5.3646059E+00
 -5.3564021E+00 -5.3482129E+00 -5.3400383E+00 -5.3318783E+00
 -5.3237329E+00 -5.3156019E+00 -5.3074855E+00 -5.2993835E+00
 -5.2912959E+00 -5.2832227E+00 -5.2751639E+00 -5.2671194E+00
 -5.2590893E+00 -5.2510734E+00 -5.2430718E+00 -5.2350843E+00
 -5.2271111E+00 -5.2191521E+00 -5.2112071E+00 -5.2032763E+00
 -5.1953596E+00 -5.1874569E+00 -5.1795682E+00 -5.1716936E+00
 -5.1638329E+00 -5.1559861E+00 -5.1481532E+00 -5.1403342E+00
 -5.1325291E+00 -5.1247378E+00 -5.1169603E+00 -5.1091965E+00
 -5.1014465E+00 -5.0937102E+00 -5.0859876E+00 -5.0782786E+00
 -5.0705833E+00 -5.0629016E+00 -5.0552334E+00 -5.0475788E+00
 -5.0399377E+00 -5.0323101E+00 -5.0246960E+00 -5.0170953E+00
 -5.0095080E+00 -5.0019341E+00 -4.9943735E+00 -4.9868263E+00
 -4.9792924E+00 -4.9717717E+00 -4.9642643E+00 -4.9567702E+00
 -4.9492892E+00 -4.9418214E+00 -4.9343667E+00 -4.9269252E+00
 -4.9194967E+00 -4.9120813E+00 -4.9046790E+00 -4.8972896E+00
 -4.8899133E+00 -4.8825499E+00 -4.8751994E+00 -4.8678618E+00
 -4.8605372E+00 -4.8532253E+00 -4.8459263E+00 -4.8386401E+00
 -4.8313667E+00 -4.8241061E+00 -4.8168581E+00 -4.8096229E+00
 -4.8024003E+00 -4.7951904E+00 -4.7879931E+00 -4.7808085E+00
 -4.7736364E+00 -4.7664768E+00 -4.7593298E+00 -4.7521952E+00
 -4.7450732E+00 -4.7379636E+00 -4.7308664E+00 -4.7237816E+00
 -4.7167092E+00 -4.7096491E+00 -4.7026014E+00 -4.6955659E+00
 -4.6885428E+00 -4.6815319E+00 -4.6745332E+00 -4.6675467E+00
 -4.6605724E+00 -4.6536103E+00 -4.6466603E+00 -4.6397224E+00
 -4.6327966E+00 -4.6258828E+00 -4.6189811E+00 -4.6120914E+00
 -4.6052136E+00 -4.5983479E+00 -4.5914941E+00 -4.5846521E+00
 -4.5778221E+00 -4.5710040E+00 -4.5641977E+00 -4.5574032E+00
 -4.5506205E+00 -4.5438496E+00 -4.5370904E+00 -4.5303430E+00
 -4.5236072E+00 -4.5168832E+00 -4.5101708E+00 -4.5034700E+00
 -4.4967809E+00 -4.4901033E+00 -4.4834373E+00 -4.4767829E+00
 -4.4701399E+00 -4.4635085E+00 -4.4568885E+00 -4.4502800E+00
 -4.4436830E+00 -4.4370973E+00 -4.4305230E+00 -4.4239601E+00
 -4.4174085E+00 -4.4108682E+00 -4.4043392E+00 -4.3978215E+00
 -4.3913151E+00 -4.3848199E+00 -4.3783358E+00 -4.3718630E+00
 -4.3654013E+00 -4.3589508E+00 -4.3525114E+00 -4.3460830E+00
 -4.3396658E+00 -4.3332596E+00 -4.3268644E+00 -4.3204803E+00
 -4.3141071E+00 -4.3077449E+00 -4.3013936E+00 -4.2950533E+00
 -4.2887238E+00 -4.2824053E+00 -4.2760976E+00 -4.2698007E+00
 -4.2635147E+00 -4.2572394E+00 -4.2509749E+00 -4.2447212E+00
 -4.2384782E+00 -4.2322459E+00 -4.2260243E+00 -4.2198134E+00
 -4.2136131E+00 -4.2074234E+00 -4.2012444E+00 -4.1950759E+00
 -4.1889180E+00 -4.1827706E+00 -4.1766338E+00 -4.1705074E+00
 -4.1643916E+00 -4.1582862E+00 -4.1521912E+00 -4.1461067E+00
 -4.1400325E+00 -4.1339688E+00 -4.1279154E+00 -4.1218723E+00
 -4.1158396E+00 -4.1098171E+00 -4.1038050E+00 -4.0978031E+00
 -4.0918114E+00 -4.0858299E+00 -4.0798587E+00 -4.0738976E+00
 -4.0679467E+00 -4.0620059E+00 -4.0560753E+00 -4.0501547E+00
 -4.0442442E+00 -4.0383438E+00 -4.0324534E+00 -4.0265731E+00
 -4.0207027E+00 -4.0148424E+00 -4.0089920E+00 -4.0031515E+00
 -3.9973210E+00 -3.9915003E+00 -3.9856896E+00 -3.9798887E+00
 -3.9740977E+00 -3.9683164E+00 -3.9625451E+00 -3.9567834E+00
 -3.9510316E+00 -3.9452895E+00 -3.9395572E+00 -3.9338345E+00
 -3.9281216E+00 -3.9224183E+00 -3.9167247E+00 -3.9110408E+00
 -3.9053664E+00 -3.8997017E+00 -3.8940465E+00 -3.8884010E+00
 -3.8827649E+00 -3.8771384E+00 -3.8715214E+00 -3.8659139E+00
 -3.8603158E+00 -3.8547273E+00 -3.8491481E+00 -3.8435784E+00
 -3.8380180E+00 -3.8324671E+00 -3.8269255E+00 -3.8213933E+00
 -3.8158704E+00 -3.8103568E+00 -3.8048525E+00 -3.7993574E+00
 -3.7938717E+00 -3.7883951E+00 -3.7829278E+00 -3.7774697E+00
 -3.7720208E+00 -3.7665810E+00 -3.7611504E+00 -3.7557289E+00
 -3.7503166E+00 -3.7449133E+00 -3.7395191E+00 -3.7341340E+00
 -3.7287579E+00 -3.7233909E+00 -3.7180328E+00 -3.7126838E+00
 -3.7073437E+00 -3.7020126E+00 -3.6966904E+00 -3.6913772E+00
 -3.6860728E+00 -3.6807774E+00 -3.6754908E+00 -3.6702131E+00
 -3.6649442E+00 -3.6596842E+00 -3.6544329E+00 -3.6491905E+00
 -3.6439568E+00 -3.6387318E+00 -3.6335156E+00 -3.6283082E+00
 -3.6231094E+00 -3.6179193E+00 -3.6127379E+00 -3.6075652E+00
 -3.6024010E+00 -3.5972455E+00 -3.5920987E+00 -3.5869604E+00
 -3.5818306E+00 -3.5767095E+00 -3.5715968E+00 -3.5664927E+00
 -3.5613971E+00 -3.5563100E+00 -3.5512314E+00 -3.5461612E+00
 -3.5410995E+00 -3.5360462E+00 -3.5310013E+00 -3.5259648E+00
 -3.5209367E+00 -3.5159170E+00 -3.5109056E+00 -3.5059025E+00
 -3.5009078E+00 -3.4959213E+00 -3.4909431E+00 -3.4859732E+00
 -3.4810116E+00 -3.4760582E+00 -3.4711130E+00 -3.4661760E+00
 -3.4612472E+00 -3.4563266E+00 -3.4514141E+00 -3.4465098E+00
 -3.4416136E+00 -3.4367255E+00 -3.4318455E+00 -3.4269736E+00
 -3.4221098E+00 -3.4172540E+00 -3.4124063E+00 -3.4075666E+00
 -3.4027349E+00 -3.3979111E+00 -3.3930954E+00 -3.3882876E+00
 -3.3834878E+00 -3.3786959E+00 -3.3739119E+00 -3.3691358E+00
 -3.3643676E+00 -3.3596072E+00 -3.3548548E+00 -3.3501101E+00
 -3.3453733E+00 -3.3406443E+00 -3.3359231E+00 -3.3312097E+00
 -3.3265040E+00 -3.3218061E+00 -3.3171160E+00 -3.3124335E+00
 -3.3077588E+00 -3.3030918E+00 -3.2984324E+00 -3.2937807E+00
 -3.2891367E+00 -3.2845003E+00 -3.2798715E+00 -3.2752504E+00
 -3.2706368E+00 -3.2660308E+00 -3.2614324E+00 -3.2568415E+00
 -3.2522582E+00 -3.2476824E+00 -3.2431141E+00 -3.2385533E+00
 -3.2339999E+00 -3.2294541E+00 -3.2249157E+00 -3.2203847E+00
 -3.2158612E+00 -3.2113450E+00 -3.2068363E+00 -3.2023350E+00
 -3.1978410E+00 -3.1933544E+00 -3.1888751E+00 -3.1844031E+00
 -3.1799385E+00 -3.1754812E+00 -3.1710311E+00 -3.1665883E+00
 -3.1621528E+00 -3.1577246E+00 -3.1533035E+00 -3.1488897E+00
 -3.1444831E+00 -3.1400837E+00 -3.1356914E+00 -3.1313064E+00
 -3.1269285E+00 -3.1225577E+00 -3.1181940E+00 -3.1138375E+00
 -3.1094880E+00 -3.1051457E+00 -3.1008104E+00 -3.0964822E+00
 -3.0921610E+00 -3.0878469E+00 -3.0835397E+00 -3.0792396E+00
 -3.0749465E+00 -3.0706604E+00 -3.0663812E+00 -3.0621090E+00
 -3.0578437E+00 -3.0535854E+00 -3.0493340E+00 -3.0450894E+00
 -3.0408518E+00 -3.0366211E+00 -3.0323972E+00 -3.0281802E+00
 -3.0239700E+00 -3.0197666E+00 -3.0155701E+00 -3.0113803E+00
 -3.0071973E+00 -3.0030212E+00 -2.9988518E+00 -2.9946891E+00
 -2.9905332E+00 -2.9863840E+00 -2.9822415E+00 -2.9781057E+00
 -2.9739766E+00 -2.9698542E+00 -2.9657385E+00 -2.9616294E+00
 -2.9575269E+00 -2.9534311E+00 -2.9493419E+00 -2.9452593E+00
 -2.9411833E+00 -2.9371138E+00 -2.9330510E+00 -2.9289947E+00
 -2.9249449E+00 -2.9209017E+00 -2.9168649E+00 -2.9128347E+00
 -2.9088110E+00 -2.9047938E+00 -2.9007830E+00 -2.8967787E+00
 -2.8927809E+00 -2.8887895E+00 -2.8848045E+00 -2.8808259E+00
 -2.8768537E+00 -2.8728879E+00 -2.8689285E+00 -2.8649754E+00
 -2.8610287E+00 -2.8570884E+00 -2.8531543E+00 -2.8492266E+00
 -2.8453052E+00 -2.8413901E+00 -2.8374813E+00 -2.8335787E+00
 -2.8296825E+00 -2.8257924E+00 -2.8219086E+00 -2.8180310E+00
 -2.8141597E+00 -2.8102945E+00 -2.8064355E+00 -2.8025827E+00
 -2.7987361E+00 -2.7948957E+00 -2.7910613E+00 -2.7872332E+00
 -2.7834111E+00 -2.7795952E+00 -2.7757853E+00 -2.7719816E+00
 -2.7681839E+00 -2.7643923E+00 -2.7606068E+00 -2.7568273E+00
 -2.7530538E+00 -2.7492864E+00 -2.7455250E+00 -2.7417695E+00
 -2.7380201E+00 -2.7342767E+00 -2.7305392E+00 -2.7268077E+00
 -2.7230821E+00 -2.7193625E+00 -2.7156488E+00 -2.7119410E+00
 -2.7082391E+00 -2.7045431E+00 -2.7008530E+00 -2.6971687E+00
 -2.6934904E+00 -2.6898179E+00 -2.6861512E+00 -2.6824903E+00
 -2.6788353E+00 -2.6751861E+00 -2.6715426E+00 -2.6679050E+00
 -2.6642731E+00 -2.6606470E+00 -2.6570267E+00 -2.6534121E+00
 -2.6498033E+00 -2.6462001E+00 -2.6426027E+00 -2.6390110E+00
 -2.6354250E+00 -2.6318446E+00 -2.6282700E+00 -2.6247010E+00
 -2.6211376E+00 -2.6175799E+00 -2.6140279E+00 -2.6104814E+00
 -2.6069406E+00 -2.6034053E+00 -2.5998757E+00 -2.5963516E+00
 -2.5928332E+00 -2.5893202E+00 -2.5858129E+00 -2.5823110E+00
 -2.5788147E+00 -2.5753239E+00 -2.5718387E+00 -2.5683589E+00
 -2.5648846E+00 -2.5614158E+00 -2.5579525E+00 -2.5544946E+00
 -2.5510422E+00 -2.5475953E+00 -2.5441537E+00 -2.5407176E+00
 -2.5372869E+00 -2.5338616E+00 -2.5304417E+00 -2.5270272E+00
 -2.5236181E+00 -2.5202143E+00 -2.5168159E+00 -2.5134228E+00
 -2.5100351E+00 -2.5066526E+00 -2.5032755E+00 -2.4999037E+00
 -2.4965373E+00 -2.4931760E+00 -2.4898201E+00 -2.4864695E+00
 -2.4831241E+00 -2.4797839E+00 -2.4764490E+00 -2.4731193E+00
 -2.4697949E+00 -2.4664756E+00 -2.4631616E+00 -2.4598527E+00
 -2.4565491E+00 -2.4532506E+00 -2.4499573E+00 -2.4466691E+00
 -2.4433861E+00 -2.4401082E+00 -2.4368354E+00 -2.4335678E+00
 -2.4303053E+00 -2.4270479E+00 -2.4237956E+00 -2.4205483E+00
 -2.4173061E+00 -2.4140690E+00 -2.4108370E+00 -2.4076100E+00
 -2.4043880E+00 -2.4011711E+00 -2.3979592E+00 -2.3947523E+00
 -2.3915504E+00 -2.3883535E+00 -2.3851616E+00 -2.3819746E+00
 -2.3787927E+00 -2.3756156E+00 -2.3724436E+00 -2.3692764E+00
 -2.3661142E+00 -2.3629570E+00 -2.3598046E+00 -2.3566572E+00
 -2.3535146E+00 -2.3503769E+00 -2.3472441E+00 -2.3441162E+00
 -2.3409932E+00 -2.3378750E+00 -2.3347616E+00 -2.3316531E+00
 -2.3285494E+00 -2.3254505E+00 -2.3223564E+00 -2.3192672E+00
 -2.3161827E+00 -2.3131030E+00 -2.3100281E+00 -2.3069579E+00
 -2.3038926E+00 -2.3008319E+00 -2.2977760E+00 -2.2947249E+00
 -2.2916784E+00 -2.2886367E+00 -2.2855997E+00 -2.2825674E+00
 -2.2795398E+00 -2.2765169E+00 -2.2734986E+00 -2.2704850E+00
 -2.2674761E+00 -2.2644718E+00 -2.2614722E+00 -2.2584772E+00
 -2.2554868E+00 -2.2525011E+00 -2.2495199E+00 -2.2465434E+00
 -2.2435715E+00 -2.2406041E+00 -2.2376413E+00 -2.2346831E+00
 -2.2317295E+00 -2.2287804E+00 -2.2258358E+00 -2.2228958E+00
 -2.2199603E+00 -2.2170293E+00 -2.2141029E+00 -2.2111810E+00
 -2.2082635E+00 -2.2053506E+00 -2.2024421E+00 -2.1995381E+00
 -2.1966385E+00 -2.1937435E+00 -2.1908528E+00 -2.1879667E+00
 -2.1850849E+00 -2.1822076E+00 -2.1793347E+00 -2.1764662E+00
 -2.1736021E+00 -2.1707424E+00 -2.1678871E+00 -2.1650362E+00
 -2.1621897E+00 -2.1593475E+00 -2.1565097E+00 -2.1536762E+00
 -2.1508471E+00 -2.1480223E+00 -2.1452018E+00 -2.1423856E+00
 -2.1395738E+00 -2.1367663E+00 -2.1339630E+00 -2.1311641E+00
 -2.1283694E+00 -2.1255790E+00 -2.1227929E+00 -2.1200111E+00
 -2.1172335E+00 -2.1144601E+00 -2.1116910E+00 -2.1089261E+00
 -2.1061654E+00 -2.1034089E+00 -2.1006567E+00 -2.0979086E+00
 -2.0951648E+00 -2.0924251E+00 -2.0896896E+00 -2.0869583E+00
 -2.0842311E+00 -2.0815081E+00 -2.0787893E+00 -2.0760746E+00
 -2.0733640E+00 -2.0706575E+00 -2.0679552E+00 -2.0652570E+00
 -2.0625629E+00 -2.0598729E+00 -2.0571870E+00 -2.0545051E+00
 -2.0518274E+00 -2.0491537E+00 -2.0464841E+00 -2.0438185E+00
 -2.0411570E+00 -2.0384996E+00 -2.0358461E+00 -2.0331967E+00
 -2.0305513E+00 -2.0279100E+00 -2.0252726E+00 -2.0226392E+00
 -2.0200099E+00 -2.0173845E+00 -2.0147631E+00 -2.0121457E+00
 -2.0095322E+00 -2.0069227E+00 -2.0043172E+00 -2.0017156E+00
 -1.9991179E+00 -1.9965242E+00 -1.9939344E+00 -1.9913485E+00
 -1.9887665E+00 -1.9861884E+00 -1.9836143E+00 -1.9810440E+00
 -1.9784776E+00 -1.9759151E+00 -1.9733564E+00 -1.9708017E+00
 -1.9682507E+00 -1.9657037E+00 -1.9631604E+00 -1.9606210E+00
 -1.9580855E+00 -1.9555537E+00 -1.9530258E+00 -1.9505017E+00
 -1.9479814E+00 -1.9454649E+00 -1.9429522E+00 -1.9404433E+00
 -1.9379381E+00 -1.9354368E+00 -1.9329392E+00 -1.9304453E+00
 -1.9279552E+00 -1.9254689E+00 -1.9229863E+00 -1.9205074E+00
 -1.9180323E+00 -1.9155608E+00 -1.9130931E+00 -1.9106291E+00
 -1.9081688E+00 -1.9057122E+00 -1.9032593E+00 -1.9008101E+00
 -1.8983645E+00 -1.8959226E+00 -1.8934844E+00 -1.8910498E+00
 -1.8886189E+00 -1.8861916E+00 -1.8837680E+00 -1.8813480E+00
 -1.8789316E+00 -1.8765189E+00 -1.8741097E+00 -1.8717042E+00
 -1.8693023E+00 -1.8669039E+00 -1.8645092E+00 -1.8621180E+00
 -1.8597305E+00 -1.8573464E+00 -1.8549660E+00 -1.8525891E+00
 -1.8502158E+00 -1.8478460E+00 -1.8454797E+00 -1.8431170E+00
 -1.8407578E+00 -1.8384021E+00 -1.8360500E+00 -1.8337013E+00
 -1.8313562E+00 -1.8290146E+00 -1.8266764E+00 -1.8243418E+00
 -1.8220106E+00 -1.8196829E+00 -1.8173586E+00 -1.8150379E+00
 -1.8127206E+00 -1.8104067E+00 -1.8080963E+00 -1.8057893E+00
 -1.8034857E+00 -1.8011856E+00 -1.7988889E+00 -1.7965956E+00
 -1.7943058E+00 -1.7920193E+00 -1.7897362E+00 -1.7874566E+00
 -1.7851803E+00 -1.7829074E+00 -1.7806378E+00 -1.7783717E+00
 -1.7761089E+00 -1.7738494E+00 -1.7715933E+00 -1.7693406E+00
 -1.7670912E+00 -1.7648451E+00 -1.7626024E+00 -1.7603630E+00
 -1.7581269E+00 -1.7558941E+00 -1.7536647E+00 -1.7514385E+00
 -1.7492156E+00 -1.7469960E+00 -1.7447797E+00 -1.7425667E+00
 -1.7403570E+00 -1.7381505E+00 -1.7359473E+00 -1.7337473E+00
 -1.7315506E+00 -1.7293572E+00 -1.7271670E+00 -1.7249800E+00
 -1.7227962E+00 -1.7206157E+00 -1.7184384E+00 -1.7162643E+00
 -1.7140934E+00 -1.7119257E+00 -1.7097613E+00 -1.7076000E+00
 -1.7054419E+00 -1.7032869E+00 -1.7011352E+00 -1.6989866E+00
 -1.6968412E+00 -1.6946990E+00 -1.6925599E+00 -1.6904239E+00
 -1.6882911E+00 -1.6861615E+00 -1.6840349E+00 -1.6819115E+00
 -1.6797912E+00 -1.6776741E+00 -1.6755600E+00 -1.6734491E+00
 -1.6713413E+00 -1.6692365E+00 -1.6671349E+00 -1.6650363E+00
 -1.6629408E+00 -1.6608484E+00 -1.6587591E+00 -1.6566728E+00
 -1.6545896E+00 -1.6525094E+00 -1.6504323E+00 -1.6483583E+00
 -1.6462873E+00 -1.6442193E+00 -1.6421543E+00 -1.6400924E+00
 -1.6380335E+00 -1.6359776E+00 -1.6339247E+00 -1.6318748E+00
 -1.6298279E+00 -1.6277841E+00 -1.6257432E+00 -1.6237053E+00
 -1.6216703E+00 -1.6196384E+00 -1.6176094E+00 -1.6155834E+00
 -1.6135603E+00 -1.6115402E+00 -1.6095230E+00 -1.6075088E+00
 -1.6054976E+00 -1.6034892E+00 -1.6014838E+00 -1.5994813E+00
 -1.5974818E+00 -1.5954851E+00 -1.5934914E+00 -1.5915006E+00
 -1.5895126E+00 -1.5875276E+00 -1.5855455E+00 -1.5835662E+00
 -1.5815899E+00 -1.5796164E+00 -1.5776457E+00 -1.5756780E+00
 -1.5737131E+00 -1.5717511E+00 -1.5697919E+00 -1.5678356E+00
 -1.5658821E+00 -1.5639314E+00 -1.5619836E+00 -1.5600386E+00
 -1.5580965E+00 -1.5561571E+00 -1.5542206E+00 -1.5522869E+00
 -1.5503560E+00 -1.5484279E+00 -1.5465026E+00 -1.5445801E+00
 -1.5426603E+00 -1.5407434E+00 -1.5388292E+00 -1.5369178E+00
 -1.5350092E+00 -1.5331034E+00 -1.5312003E+00 -1.5292999E+00
 -1.5274023E+00 -1.5255075E+00 -1.5236154E+00 -1.5217260E+00
 -1.5198394E+00 -1.5179555E+00 -1.5160743E+00 -1.5141959E+00
 -1.5123201E+00 -1.5104471E+00 -1.5085767E+00 -1.5067091E+00
 -1.5048442E+00 -1.5029819E+00 -1.5011224E+00 -1.4992655E+00
 -1.4974113E+00 -1.4955598E+00 -1.4937110E+00 -1.4918648E+00
 -1.4900213E+00 -1.4881804E+00 -1.4863422E+00 -1.4845067E+00
 -1.4826738E+00 -1.4808435E+00 -1.4790158E+00 -1.4771908E+00
 -1.4753685E+00 -1.4735487E+00 -1.4717316E+00 -1.4699170E+00
 -1.4681051E+00 -1.4662958E+00 -1.4644891E+00 -1.4626850E+00
 -1.4608835E+00 -1.4590845E+00 -1.4572882E+00 -1.4554944E+00
 -1.4537032E+00 -1.4519146E+00 -1.4501285E+00 -1.4483451E+00
 -1.4465641E+00 -1.4447857E+00 -1.4430099E+00 -1.4412366E+00
 -1.4394659E+00 -1.4376977E+00 -1.4359320E+00 -1.4341689E+00
 -1.4324082E+00 -1.4306502E+00 -1.4288946E+00 -1.4271415E+00
 -1.4253910E+00 -1.4236429E+00 -1.4218973E+00 -1.4201543E+00
 -1.4184137E+00 -1.4166757E+00 -1.4149401E+00 -1.4132070E+00
 -1.4114763E+00 -1.4097482E+00 -1.4080225E+00 -1.4062992E+00
 -1.4045785E+00 -1.4028602E+00 -1.4011443E+00 -1.3994309E+00
 -1.3977199E+00 -1.3960114E+00 -1.3943053E+00 -1.3926016E+00
 -1.3909004E+00 -1.3892016E+00 -1.3875052E+00 -1.3858112E+00
 -1.3841197E+00 -1.3824305E+00 -1.3807438E+00 -1.3790594E+00
 -1.3773775E+00 -1.3756979E+00 -1.3740207E+00 -1.3723460E+00
 -1.3706735E+00 -1.3690035E+00 -1.3673359E+00 -1.3656706E+00
 -1.3640077E+00 -1.3623471E+00 -1.3606889E+00 -1.3590331E+00
 -1.3573796E+00 -1.3557284E+00 -1.3540796E+00 -1.3524332E+00
 -1.3507890E+00 -1.3491472E+00 -1.3475078E+00 -1.3458706E+00
 -1.3442358E+00 -1.3426033E+00 -1.3409731E+00 -1.3393452E+00
 -1.3377196E+00 -1.3360963E+00 -1.3344754E+00 -1.3328567E+00
 -1.3312403E+00 -1.3296262E+00 -1.3280143E+00 -1.3264048E+00
 -1.3247975E+00 -1.3231925E+00 -1.3215898E+00 -1.3199893E+00
 -1.3183911E+00 -1.3167951E+00 -1.3152014E+00 -1.3136100E+00
 -1.3120208E+00 -1.3104338E+00 -1.3088491E+00 -1.3072666E+00
 -1.3056863E+00 -1.3041083E+00 -1.3025325E+00 -1.3009589E+00
 -1.2993876E+00 -1.2978184E+00 -1.2962515E+00 -1.2946867E+00
 -1.2931242E+00 -1.2915639E+00 -1.2900057E+00 -1.2884498E+00
 -1.2868960E+00 -1.2853445E+00 -1.2837951E+00 -1.2822479E+00
 -1.2807029E+00 -1.2791600E+00 -1.2776193E+00 -1.2760808E+00
 -1.2745444E+00 -1.2730102E+00 -1.2714781E+00 -1.2699482E+00
 -1.2684205E+00 -1.2668949E+00 -1.2653714E+00 -1.2638501E+00
 -1.2623309E+00 -1.2608138E+00 -1.2592988E+00 -1.2577860E+00
 -1.2562753E+00 -1.2547667E+00 -1.2532603E+00 -1.2517559E+00
 -1.2502536E+00 -1.2487535E+00 -1.2472554E+00 -1.2457595E+00
  4.3897054E+04  8.7389963E+04  1.3048152E+05  1.7317450E+05
  2.1547165E+05  2.5737572E+05  2.9888943E+05  3.4001548E+05
  3.8075657E+05  4.2111536E+05  4.6109452E+05  5.0069667E+05
  5.3992446E+05  5.7878048E+05  6.1726733E+05  6.5538758E+05
  6.9314378E+05  7.3053850E+05  7.6757424E+05  8.0425353E+05
  8.4057887E+05  8.7655272E+05  9.1217757E+05  9.4745585E+05
  9.8239002E+05  1.0169825E+06  1.0512356E+06  1.0851519E+06
  1.1187336E+06  1.1519832E+06  1.1849029E+06  1.2174952E+06
  1.2497622E+06  1.2817064E+06  1.3133300E+06  1.3446353E+06
  1.3756246E+06  1.4063001E+06  1.4366640E+06  1.4667185E+06
  1.4964659E+06  1.5259084E+06  1.5550480E+06  1.5838871E+06
  1.6124277E+06  1.6406720E+06  1.6686220E+06  1.6962800E+06
  1.7236480E+06  1.7507280E+06  1.7775223E+06  1.8040327E+06
  1.8302614E+06  1.8562104E+06  1.8818817E+06  1.9072773E+06
  1.9323993E+06  1.9572495E+06  1.9818300E+06  2.0061428E+06
  2.0301896E+06  2.0539726E+06  2.0774936E+06  2.1007546E+06
  2.1237573E+06  2.1465038E+06  2.1689958E+06  2.1912353E+06
  2.2132241E+06  2.2349640E+06  2.2564568E+06  2.2777044E+06
  2.2987086E+06  2.3194711E+06  2.3399938E+06  2.3602783E+06
  2.3803265E+06  2.4001402E+06  2.4197210E+06  2.4390706E+06
  2.4581908E+06  2.4770833E+06  2.4957498E+06  2.5141920E+06
  2.5324114E+06  2.5504098E+06  2.5681889E+06  2.5857503E+06
  2.6030955E+06  2.6202263E+06  2.6371441E+06  2.6538507E+06
  2.6703476E+06  2.6866364E+06  2.7027187E+06  2.7185959E+06
  2.7342697E+06  2.7497416E+06  2.7650131E+06  2.7800857E+06
  2.7949610E+06  2.8096404E+06  2.8241254E+06  2.8384176E+06
  2.8525183E+06  2.8664290E+06  2.8801512E+06  2.8936864E+06
  2.9070359E+06  2.9202012E+06  2.9331837E+06  2.9459847E+06
  2.9586058E+06  2.9710482E+06  2.9833134E+06  2.9954027E+06
  3.0073175E+06  3.0190591E+06  3.0306289E+06  3.0420282E+06
  3.0532583E+06  3.0643206E+06  3.0752163E+06  3.0859468E+06
  3.0965133E+06  3.1069172E+06  3.1171596E+06  3.1272419E+06
  3.1371653E+06  3.1469311E+06  3.1565406E+06  3.1659948E+06
  3.1752951E+06  3.1844428E+06  3.1934389E+06  3.2022847E+06
  3.2109814E+06  3.2195301E+06  3.2279322E+06  3.2361886E+06
  3.2443006E+06  3.2522694E+06  3.2600961E+06  3.2677817E+06
  3.2753276E+06  3.2827347E+06  3.2900042E+06  3.2971372E+06
  3.3041349E+06  3.3109982E+06  3.3177284E+06  3.3243264E+06
  3.3307934E+06  3.3371303E+06  3.3433384E+06  3.3494186E+06
  3.3553720E+06  3.3611996E+06  3.3669024E+06  3.3724815E+06
  3.3779379E+06  3.3832725E+06  3.3884865E+06  3.3935808E+06
  3.3985564E+06  3.4034143E+06  3.4081554E+06  3.4127808E+06
  3.4172913E+06  3.4216880E+06  3.4259719E+06  3.4301437E+06
  3.4342046E+06  3.4381554E+06  3.4419970E+06  3.4457304E+06
  3.4493565E+06  3.4528762E+06  3.4562905E+06  3.4596001E+06
  3.4628060E+06  3.4659090E+06  3.4689102E+06  3.4718102E+06
  3.4746100E+06  3.4773105E+06  3.4799125E+06  3.4824169E+06
  3.4848245E+06  3.4871361E+06  3.4893525E+06  3.4914747E+06
  3.4935034E+06  3.4954394E+06  3.4972836E+06  3.4990367E+06
  3.5006996E+06  3.5022731E+06  3.5037578E+06  3.5051547E+06
  3.5064644E+06  3.5076879E+06  3.5088257E+06  3.5098788E+06
  3.5108478E+06  3.5117335E+06  3.5125367E+06  3.5132580E+06
  3.5138983E+06  3.5144582E+06  3.5149386E+06  3.5153400E+06
  3.5156632E+06  3.5159090E+06  3.5160780E+06  3.5161710E+06
  3.5161886E+06  3.5161315E+06  3.5160004E+06  3.5157961E+06
  3.5155191E+06  3.5151701E+06  3.5147499E+06  3.5142591E+06
  3.5136982E+06  3.5130681E+06  3.5123694E+06  3.5116026E+06
  3.5107684E+06  3.5098676E+06  3.5089006E+06  3.5078681E+06
  3.5067708E+06  3.5056093E+06  3.5043841E+06  3.5030960E+06
  3.5017454E+06  3.5003331E+06  3.4988595E+06  3.4973254E+06
  3.4957312E+06  3.4940776E+06  3.4923651E+06  3.4905944E+06
  3.4887659E+06  3.4868803E+06  3.4849382E+06  3.4829400E+06
  3.4808864E+06  3.4787779E+06  3.4766151E+06  3.4743984E+06
  3.4721285E+06  3.4698058E+06  3.4674310E+06  3.4650045E+06
  3.4625268E+06  3.4599986E+06  3.4574202E+06  3.4547923E+06
  3.4521153E+06  3.4493897E+06  3.4466161E+06  3.4437949E+06
  3.4409267E+06  3.4380119E+06  3.4350510E+06  3.4320445E+06
  3.4289929E+06  3.4258967E+06  3.4227563E+06  3.4195722E+06
  3.4163449E+06  3.4130749E+06  3.4097626E+06  3.4064084E+06
  3.4030129E+06  3.3995765E+06  3.3960995E+06  3.3925826E+06
  3.3890261E+06  3.3854304E+06  3.3817960E+06  3.3781233E+06
  3.3744128E+06  3.3706648E+06  3.3668799E+06  3.3630584E+06
  3.3592007E+06  3.3553073E+06  3.3513785E+06  3.3474148E+06
  3.3434166E+06  3.3393842E+06  3.3353181E+06  3.3312187E+06
  3.3270864E+06  3.3229215E+06  3.3187245E+06  3.3144956E+06
  3.3102354E+06  3.3059442E+06  3.3016224E+06  3.2972702E+06
  3.2928882E+06  3.2884767E+06  3.2840360E+06  3.2795665E+06
  3.2750685E+06  3.2705425E+06  3.2659887E+06  3.2614076E+06
  3.2567994E+06  3.2521645E+06  3.2475033E+06  3.2428161E+06
  3.2381032E+06  3.2333650E+06  3.2286019E+06  3.2238140E+06
  3.2190018E+06  3.2141656E+06  3.2093057E+06  3.2044225E+06
  3.1995162E+06  3.1945871E+06  3.1896357E+06  3.1846621E+06
  3.1796668E+06  3.1746499E+06  3.1696119E+06  3.1645529E+06
  3.1594734E+06  3.1543736E+06  3.1492538E+06  3.1441142E+06
  3.1389553E+06  3.1337772E+06  3.1285803E+06  3.1233648E+06
  3.1181311E+06  3.1128793E+06  3.1076099E+06  3.1023229E+06
  3.0970188E+06  3.0916978E+06  3.0863602E+06  3.0810062E+06
  3.0756360E+06  3.0702500E+06  3.0648485E+06  3.0594316E+06
  3.0539996E+06  3.0485528E+06  3.0430915E+06  3.0376158E+06
  3.0321260E+06  3.0266224E+06  3.0211053E+06  3.0155748E+06
  3.0100312E+06  3.0044747E+06  2.9989056E+06  2.9933241E+06
  2.9877305E+06  2.9821249E+06  2.9765076E+06  2.9708788E+06
  2.9652388E+06  2.9595878E+06  2.9539259E+06  2.9482535E+06
  2.9425707E+06  2.9368777E+06  2.9311748E+06  2.9254622E+06
  2.9197400E+06  2.9140086E+06  2.9082680E+06  2.9025185E+06
  2.8967604E+06  2.8909937E+06  2.8852188E+06  2.8794357E+06
  2.8736448E+06  2.8678461E+06  2.8620400E+06  2.8562265E+06
  2.8504059E+06  2.8445784E+06  2.8387441E+06  2.8329033E+06
  2.8270561E+06  2.8212027E+06  2.8153432E+06  2.8094780E+06
  2.8036070E+06  2.7977306E+06  2.7918489E+06  2.7859620E+06
  2.7800702E+06  2.7741736E+06  2.7682724E+06  2.7623667E+06
  2.7564567E+06  2.7505426E+06  2.7446246E+06  2.7387027E+06
  2.7327772E+06  2.7268482E+06  2.7209159E+06  2.7149804E+06
  2.7090419E+06  2.7031006E+06  2.6971565E+06  2.6912099E+06
  2.6852609E+06  2.6793096E+06  2.6733563E+06  2.6674009E+06
  2.6614437E+06  2.6554849E+06  2.6495245E+06  2.6435627E+06
  2.6375997E+06  2.6316356E+06  2.6256704E+06  2.6197044E+06
  2.6137377E+06  2.6077705E+06  2.6018027E+06  2.5958347E+06
  2.5898665E+06  2.5838982E+06  2.5779300E+06  2.5719619E+06
  2.5659942E+06  2.5600269E+06  2.5540602E+06  2.5480942E+06
  2.5421290E+06  2.5361647E+06  2.5302015E+06  2.5242394E+06
  2.5182786E+06  2.5123191E+06  2.5063612E+06  2.5004049E+06
  2.4944503E+06  2.4884976E+06  2.4825468E+06  2.4765980E+06
  2.4706514E+06  2.4647071E+06  2.4587652E+06  2.4528257E+06
  2.4468888E+06  2.4409546E+06  2.4350232E+06  2.4290947E+06
  2.4231691E+06  2.4172466E+06  2.4113273E+06  2.4054113E+06
  2.3994987E+06  2.3935895E+06  2.3876838E+06  2.3817819E+06
  2.3758836E+06  2.3699892E+06  2.3640987E+06  2.3582122E+06
  2.3523298E+06  2.3464517E+06  2.3405777E+06  2.3347082E+06
  2.3288430E+06  2.3229824E+06  2.3171264E+06  2.3112751E+06
  2.3054286E+06  2.2995869E+06  2.2937502E+06  2.2879184E+06
  2.2820917E+06  2.2762702E+06  2.2704540E+06  2.2646430E+06
  2.2588374E+06  2.2530373E+06  2.2472428E+06  2.2414538E+06
  2.2356705E+06  2.2298930E+06  2.2241212E+06  2.2183554E+06
  2.2125955E+06  2.2068417E+06  2.2010939E+06  2.1953523E+06
  2.1896168E+06  2.1838877E+06  2.1781650E+06  2.1724486E+06
  2.1667387E+06  2.1610353E+06  2.1553386E+06  2.1496485E+06
  2.1439651E+06  2.1382884E+06  2.1326186E+06  2.1269557E+06
  2.1212998E+06  2.1156508E+06  2.1100089E+06  2.1043741E+06
  2.0987465E+06  2.0931261E+06  2.0875130E+06  2.0819071E+06
  2.0763087E+06  2.0707177E+06  2.0651342E+06  2.0595582E+06
  2.0539897E+06  2.0484289E+06  2.0428758E+06  2.0373303E+06
  2.0317927E+06  2.0262628E+06  2.0207409E+06  2.0152268E+06
  2.0097206E+06  2.0042225E+06  1.9987324E+06  1.9932503E+06
  1.9877764E+06  1.9823106E+06  1.9768531E+06  1.9714037E+06
  1.9659627E+06  1.9605299E+06  1.9551056E+06  1.9496896E+06
  1.9442820E+06  1.9388830E+06  1.9334924E+06  1.9281104E+06
  1.9227369E+06  1.9173721E+06  1.9120159E+06  1.9066684E+06
  1.9013296E+06  1.8959996E+06  1.8906783E+06  1.8853659E+06
  1.8800623E+06  1.8747676E+06  1.8694818E+06  1.8642049E+06
  1.8589370E+06  1.8536781E+06  1.8484282E+06  1.8431873E+06
  1.8379556E+06  1.8327329E+06  1.8275194E+06  1.8223151E+06
  1.8171199E+06  1.8119340E+06  1.8067573E+06  1.8015898E+06
  1.7964317E+06  1.7912828E+06  1.7861433E+06  1.7810132E+06
  1.7758924E+06  1.7707811E+06  1.7656792E+06  1.7605867E+06
  1.7555037E+06  1.7504301E+06  1.7453661E+06  1.7403116E+06
  1.7352667E+06  1.7302313E+06  1.7252056E+06  1.7201894E+06
  1.7151828E+06  1.7101859E+06  1.7051987E+06  1.7002211E+06
  1.6952532E+06  1.6902951E+06  1.6853466E+06  1.6804079E+06
  1.6754790E+06  1.6705598E+06  1.6656504E+06  1.6607508E+06
  1.6558610E+06  1.6509810E+06  1.6461109E+06  1.6412507E+06
  1.6364003E+06  1.6315597E+06  1.6267291E+06  1.6219084E+06
  1.6170976E+06  1.6122967E+06  1.6075057E+06  1.6027247E+06
  1.5979536E+06  1.5931925E+06  1.5884413E+06  1.5837002E+06
  1.5789690E+06  1.5742479E+06  1.5695367E+06  1.5648356E+06
  1.5601444E+06  1.5554633E+06  1.5507923E+06  1.5461313E+06
  1.5414803E+06  1.5368394E+06  1.5322086E+06  1.5275878E+06
  1.5229771E+06  1.5183765E+06  1.5137859E+06  1.5092055E+06
  1.5046351E+06  1.5000749E+06  1.4955247E+06  1.4909847E+06
  1.4864547E+06  1.4819349E+06  1.4774251E+06  1.4729255E+06
  1.4684361E+06  1.4639567E+06  1.4594874E+06  1.4550283E+06
  1.4505793E+06  1.4461405E+06  1.4417117E+06  1.4372931E+06
  1.4328846E+06  1.4284863E+06  1.4240981E+06  1.4197200E+06
  1.4153520E+06  1.4109942E+06  1.4066465E+06  1.4023089E+06
  1.3979815E+06  1.3936642E+06  1.3893570E+06  1.3850599E+06
  1.3807729E+06  1.3764961E+06  1.3722294E+06  1.3679728E+06
  1.3637263E+06  1.3594899E+06  1.3552636E+06  1.3510475E+06
  1.3468414E+06  1.3426454E+06  1.3384595E+06  1.3342837E+06
  1.3301180E+06  1.3259623E+06  1.3218167E+06  1.3176812E+06
  1.3135558E+06  1.3094404E+06  1.3053351E+06  1.3012398E+06
  1.2971545E+06  1.2930793E+06  1.2890142E+06  1.2849590E+06
  1.2809139E+06  1.2768788E+06  1.2728537E+06  1.2688386E+06
  1.2648335E+06  1.2608384E+06  1.2568532E+06  1.2528780E+06
  1.2489128E+06  1.2449576E+06  1.2410123E+06  1.2370769E+06
  1.2331515E+06  1.2292360E+06  1.2253304E+06  1.2214347E+06
  1.2175489E+06  1.2136731E+06  1.2098071E+06  1.2059509E+06
  1.2021047E+06  1.1982683E+06  1.1944417E+06  1.1906250E+06
  1.1868181E+06  1.1830210E+06  1.1792338E+06  1.1754563E+06
  1.1716886E+06  1.1679308E+06  1.1641826E+06  1.1604443E+06
  1.1567156E+06  1.1529968E+06  1.1492876E+06  1.1455882E+06
  1.1418984E+06  1.1382184E+06  1.1345480E+06  1.1308874E+06
  1.1272363E+06  1.1235950E+06  1.1199632E+06  1.1163411E+06
  1.1127286E+06  1.1091257E+06  1.1055324E+06  1.1019487E+06
  1.0983746E+06  1.0948100E+06  1.0912549E+06  1.0877094E+06
  1.0841734E+06  1.0806469E+06  1.0771299E+06  1.0736224E+06
  1.0701243E+06  1.0666357E+06  1.0631565E+06  1.0596868E+06
  1.0562265E+06  1.0527756E+06  1.0493340E+06  1.0459019E+06
  1.0424791E+06  1.0390657E+06  1.0356615E+06  1.0322668E+06
  1.0288813E+06  1.0255051E+06  1.0221382E+06  1.0187806E+06
  1.0154322E+06  1.0120931E+06  1.0087632E+06  1.0054425E+06
  1.0021309E+06  9.9882862E+05  9.9553546E+05  9.9225146E+05
  9.8897659E+05  9.8571085E+05  9.8245421E+05  9.7920668E+05
  9.7596822E+05  9.7273883E+05  9.6951849E+05  9.6630718E+05
  9.6310490E+05  9.5991162E+05  9.5672733E+05  9.5355201E+05
  9.5038566E+05  9.4722825E+05  9.4407978E+05  9.4094021E+05
  9.3780955E+05  9.3468777E+05  9.3157486E+05  9.2847080E+05
  9.2537558E+05  9.2228918E+05  9.1921159E+05  9.1614278E+05
  9.1308276E+05  9.1003149E+05  9.0698896E+05  9.0395516E+05
  9.0093008E+05  8.9791368E+05  8.9490597E+05  8.9190692E+05
  8.8891652E+05  8.8593476E+05  8.8296160E+05  8.7999705E+05
  8.7704108E+05  8.7409367E+05  8.7115482E+05  8.6822450E+05
  8.6530270E+05  8.6238940E+05  8.5948459E+05  8.5658824E+05
  8.5370035E+05  8.5082090E+05  8.4794986E+05  8.4508723E+05
  8.4223298E+05  8.3938711E+05  8.3654958E+05  8.3372040E+05
  8.3089953E+05  8.2808697E+05  8.2528270E+05  8.2248670E+05
  8.1969895E+05  8.1691943E+05  8.1414814E+05  8.1138505E+05
  8.0863015E+05  8.0588341E+05  8.0314483E+05  8.0041439E+05
  7.9769206E+05  7.9497784E+05  7.9227170E+05  7.8957363E+05
  7.8688361E+05  7.8420163E+05  7.8152766E+05  7.7886170E+05
  7.7620372E+05  7.7355370E+05  7.7091164E+05  7.6827750E+05
  7.6565129E+05  7.6303297E+05  7.6042253E+05  7.5781996E+05
  7.5522523E+05  7.5263833E+05  7.5005925E+05  7.4748796E+05
  7.4492445E+05  7.4236871E+05  7.3982070E+05  7.3728043E+05
  7.3474786E+05  7.3222299E+05  7.2970580E+05  7.2719626E+05
  7.2469436E+05  7.2220009E+05  7.1971343E+05  7.1723435E+05
  7.1476285E+05  7.1229891E+05  7.0984250E+05  7.0739361E+05
  7.0495223E+05  7.0251834E+05  7.0009191E+05  6.9767294E+05
  6.9526140E+05  6.9285728E+05  6.9046056E+05  6.8807123E+05
  6.8568926E+05  6.8331464E+05  6.8094735E+05  6.7858738E+05
  6.7623471E+05  6.7388931E+05  6.7155118E+05  6.6922030E+05
  6.6689664E+05  6.6458020E+05  6.6227095E+05  6.5996888E+05
  6.5767397E+05  6.5538620E+05  6.5310556E+05  6.5083203E+05
  6.4856559E+05  6.4630623E+05  6.4405392E+05  6.4180865E+05
  6.3957041E+05  6.3733917E+05  6.3511493E+05  6.3289765E+05
  6.3068733E+05  6.2848395E+05  6.2628749E+05  6.2409793E+05
  6.2191526E+05  6.1973946E+05  6.1757052E+05  6.1540841E+05
  6.1325312E+05  6.1110463E+05  6.0896292E+05  6.0682799E+05
  6.0469980E+05  6.0257835E+05  6.0046362E+05  5.9835559E+05
  5.9625424E+05  5.9415956E+05  5.9207153E+05  5.8999013E+05
  5.8791535E+05  5.8584717E+05  5.8378557E+05  5.8173054E+05
  5.7968205E+05  5.7764010E+05  5.7560467E+05  5.7357573E+05
  5.7155328E+05  5.6953729E+05  5.6752775E+05  5.6552464E+05
  5.6352795E+05  5.6153766E+05  5.5955375E+05  5.5757620E+05
  5.5560501E+05  5.5364014E+05  5.5168160E+05  5.4972935E+05
  5.4778339E+05  5.4584369E+05  5.4391024E+05  5.4198303E+05
  5.4006204E+05  5.3814724E+05  5.3623863E+05  5.3433619E+05
  5.3243990E+05  5.3054975E+05  5.2866571E+05  5.2678778E+05
  5.2491594E+05  5.2305016E+05  5.2119044E+05  5.1933676E+05
  5.1748910E+05  5.1564745E+05  5.1381178E+05  5.1198209E+05
  5.1015836E+05  5.0834056E+05  5.0652870E+05  5.0472274E+05
  5.0292267E+05  5.0112849E+05  4.9934016E+05  4.9755768E+05
  4.9578103E+05  4.9401019E+05  4.9224515E+05  4.9048589E+05
  4.8873239E+05  4.8698465E+05  4.8524264E+05  4.8350635E+05
  4.8177576E+05  4.8005086E+05  4.7833163E+05  4.7661806E+05
  4.7491013E+05  4.7320782E+05  4.7151112E+05  4.6982002E+05
  4.6813449E+05  4.6645452E+05  4.6478010E+05  4.6311121E+05
  4.6144784E+05  4.5978997E+05  4.5803973E+05  4.5639602E+05
  4.5475981E+05  4.5313109E+05  4.5150982E+05  4.4989599E+05
  4.4828956E+05  4.4669053E+05  4.4509887E+05  4.4351454E+05
  4.4193754E+05  4.4036783E+05  4.3880539E+05  4.3725020E+05
  4.3570223E+05  4.3416147E+05  4.3262788E+05  4.3110145E+05
  4.2958214E+05  4.2806994E+05  4.2656482E+05  4.2506676E+05
  4.2357573E+05  4.2209170E+05  4.2061466E+05  4.1914458E+05
  4.1768143E+05  4.1622520E+05  4.1477584E+05  4.1333335E+05
  4.1189769E+05  4.1046884E+05  4.0904678E+05  4.0763147E+05
  4.0622290E+05  4.0482104E+05  4.0342586E+05  4.0203735E+05
  4.0065546E+05  3.9928019E+05  3.9791149E+05  3.9654936E+05
  3.9519375E+05  3.9384465E+05  3.9250203E+05  3.9116586E+05
  3.8983612E+05  3.8851279E+05  3.8719583E+05  3.8588522E+05
  3.8458093E+05  3.8328294E+05  3.8199122E+05  3.8070575E+05
  3.7942649E+05  3.7815343E+05  3.7688654E+05  3.7562578E+05
  3.7437114E+05  3.7312258E+05  3.7188009E+05  3.7064363E+05
  3.6941317E+05  3.6818870E+05  3.6697017E+05  3.6575758E+05
  3.6455088E+05  3.6335006E+05  3.6215508E+05  3.6096592E+05
  3.5978255E+05  3.5860495E+05  3.5743308E+05  3.5626693E+05
  3.5510646E+05  3.5395164E+05  3.5280246E+05  3.5165887E+05
  3.5052086E+05  3.4938840E+05  3.4826145E+05  3.4714000E+05
  3.4602401E+05  3.4491346E+05  3.4380832E+05  3.4270857E+05
  3.4161417E+05  3.4052509E+05  3.3944132E+05  3.3836281E+05
  3.3728955E+05  3.3622151E+05  3.3515866E+05  3.3410097E+05
  3.3304841E+05  3.3200096E+05  3.3095859E+05  3.2992127E+05
  3.2888897E+05  3.2786166E+05  3.2683933E+05  3.2582193E+05
  3.2480944E+05  3.2380184E+05  3.2279909E+05  3.2180117E+05
  3.2080806E+05  3.1981971E+05  3.1883611E+05  3.1785722E+05
  3.1688302E+05  3.1591348E+05  3.1494858E+05  3.1398828E+05
  3.1303255E+05  3.1208138E+05  3.1113472E+05  3.1019256E+05
  3.0925486E+05  3.0832160E+05  3.0739275E+05  3.0646828E+05
  3.0554816E+05  3.0463236E+05  3.0372086E+05  3.0281363E+05
  3.0191065E+05  3.0101187E+05  3.0011728E+05  2.9922685E+05
  2.9834054E+05  2.9745834E+05  2.9658021E+05  2.9570612E+05
  2.9483605E+05  2.9396997E+05  2.9310786E+05  2.9224967E+05
  2.9139540E+05  2.9054500E+05  2.8969845E+05  2.8885572E+05
  2.8801678E+05  2.8718162E+05  2.8635019E+05  2.8552247E+05
  2.8469844E+05  2.8387806E+05  2.8306131E+05  2.8224816E+05
  2.8143858E+05  2.8063255E+05  2.7983004E+05  2.7903101E+05
  2.7823545E+05  2.7744332E+05  2.7665460E+05  2.7586926E+05
  2.7508727E+05  2.7430860E+05  2.7353324E+05  2.7276114E+05
  2.7199228E+05  2.7122664E+05  2.7046419E+05  2.6970490E+05
  2.6894874E+05  2.6819569E+05  2.6744572E+05  2.6669880E+05
  2.6595491E+05  2.6521401E+05  2.6447609E+05  2.6374111E+05
  2.6300904E+05  2.6227987E+05  2.6155356E+05  2.6083009E+05
  2.6010943E+05  2.5939155E+05  2.5867642E+05  2.5796403E+05
  2.5725434E+05  2.5654732E+05  2.5584296E+05  2.5514122E+05
  2.5444208E+05  2.5374551E+05  2.5305149E+05  2.5235998E+05
  2.5167097E+05  2.5098442E+05  2.5030031E+05  2.4961862E+05
  2.4893931E+05  2.4826237E+05  2.4758776E+05  2.4691547E+05
  2.4624546E+05  2.4557771E+05  2.4491219E+05  2.4424888E+05
  2.4358776E+05  2.4292879E+05  2.4227195E+05  2.4161722E+05
  2.4096457E+05  2.4031397E+05  2.3966541E+05  2.3901885E+05
  2.3837428E+05  2.3773166E+05  2.3709097E+05  2.3645218E+05
  2.3581528E+05  2.3518024E+05  2.3454703E+05  2.3391562E+05
  2.3328600E+05  2.3265814E+05  2.3203201E+05  2.3140759E+05
  2.3078486E+05  2.3016379E+05  2.2954436E+05  2.2892655E+05
  2.2831032E+05  2.2769566E+05  2.2708255E+05  2.2647095E+05
  2.2586085E+05  2.2525222E+05  2.2464505E+05  2.2403929E+05
  2.2343494E+05  2.2283197E+05  2.2223036E+05  2.2163008E+05
  2.2103111E+05  2.2043344E+05  2.1983702E+05  2.1924185E+05
  2.1864790E+05  2.1805515E+05  2.1746357E+05  2.1687315E+05
  2.1628386E+05  2.1569567E+05  2.1510858E+05  2.1452255E+05
  2.1393757E+05  2.1335361E+05  2.1277065E+05  2.1218867E+05
  2.1160764E+05  2.1102756E+05  2.1044839E+05  2.0987011E+05
  2.0929271E+05  2.0871616E+05  2.0814045E+05  2.0756554E+05
  2.0699143E+05  2.0641809E+05  2.0584550E+05  2.0527363E+05
  2.0470248E+05  2.0413202E+05  2.0356223E+05  2.0299309E+05
  2.0242459E+05  2.0185669E+05  2.0128938E+05  2.0072265E+05
  2.0015647E+05  1.9959083E+05  1.9902570E+05  1.9846107E+05
  1.9789692E+05  1.9733323E+05  1.9676997E+05  1.9620714E+05
  1.9564472E+05  1.9508268E+05  1.9452101E+05  1.9395969E+05
  1.9339870E+05  1.9283803E+05  1.9227765E+05  1.9171756E+05
  1.9115773E+05  1.9059814E+05  1.9003878E+05  1.8947964E+05
  1.8892069E+05  1.8836192E+05  1.8780331E+05  1.8724484E+05
  1.8668651E+05  1.8612829E+05  1.8557017E+05  1.8501212E+05
  1.8445415E+05  1.8389622E+05  1.8333833E+05  1.8278046E+05
  1.8222260E+05  1.8166472E+05  1.8110682E+05  1.8054888E+05
  1.7999089E+05  1.7943282E+05  1.7887468E+05  1.7831643E+05
  1.7775808E+05  1.7719960E+05  1.7664098E+05  1.7608221E+05
  1.7552327E+05  1.7496415E+05  1.7440485E+05  1.7384533E+05
  1.7328560E+05  1.7272564E+05  1.7216544E+05  1.7160498E+05
  1.7104425E+05  1.7048324E+05  1.6992194E+05  1.6936034E+05
  1.6879842E+05  1.6823618E+05  1.6767360E+05  1.6711067E+05
  1.6654738E+05  1.6598372E+05  1.6541968E+05  1.6485525E+05
  1.6429042E+05  1.6372517E+05  1.6315951E+05  1.6259341E+05
  1.6202687E+05  1.6145988E+05  1.6089243E+05  1.6032451E+05
  1.5975611E+05  1.5918722E+05  1.5861784E+05  1.5804796E+05
  1.5747756E+05  1.5690664E+05  1.5633519E+05  1.5576321E+05
  1.5519068E+05  1.5461760E+05  1.5404397E+05  1.5346977E+05
  1.5289499E+05  1.5231964E+05  1.5174370E+05  1.5116716E+05
  1.5059003E+05  1.5001230E+05  1.4943395E+05  1.4885499E+05
  1.4827541E+05  1.4769520E+05  1.4711436E+05  1.4653289E+05
  1.4595077E+05  1.4536800E+05  1.4478459E+05  1.4420052E+05
  1.4361580E+05  1.4303041E+05  1.4244436E+05  1.4185763E+05
  1.4127024E+05  1.4068217E+05  1.4009342E+05  1.3950400E+05
  1.3891388E+05  1.3832309E+05  1.3773161E+05  1.3713943E+05
  1.3654657E+05  1.3595302E+05  1.3535877E+05  1.3476383E+05
  1.3416819E+05  1.3357186E+05  1.3297483E+05  1.3237710E+05
  1.3177868E+05  1.3117956E+05  1.3057975E+05  1.2997924E+05
  1.2937804E+05  1.2877614E+05  1.2817355E+05  1.2757027E+05
  1.2696630E+05  1.2636165E+05  1.2575630E+05  1.2515028E+05
  1.2454358E+05  1.2393619E+05  1.2332814E+05  1.2271941E+05
  1.2211001E+05  1.2149995E+05  1.2088923E+05  1.2027785E+05
  1.1966582E+05  1.1905314E+05  1.1843982E+05  1.1782586E+05
  1.1721126E+05  1.1659604E+05  1.1598019E+05  1.1536373E+05
  1.1474666E+05  1.1412898E+05  1.1351070E+05  1.1289184E+05
  1.1227238E+05  1.1165236E+05  1.1103176E+05  1.1041059E+05
  1.0978888E+05  1.0916662E+05  1.0854382E+05  1.0792049E+05
  1.0729664E+05  1.0667227E+05  1.0604741E+05  1.0542205E+05
  1.0479621E+05  1.0416989E+05  1.0354312E+05  1.0291588E+05
  1.0228821E+05  1.0166011E+05  1.0103158E+05  1.0040265E+05
  9.9773321E+04  9.9143606E+04  9.8513518E+04  9.7883070E+04
  9.7252273E+04  9.6621142E+04  9.5989689E+04  9.5357927E+04
  9.4725870E+04  9.4093532E+04  9.3460927E+04  9.2828069E+04
  9.2194974E+04  9.1561655E+04  9.0928128E+04  9.0294409E+04
  8.9660512E+04  8.9026455E+04  8.8392252E+04  8.7757921E+04
  8.7123478E+04  8.6488941E+04  8.5854325E+04  8.5219649E+04
  8.4584931E+04  8.3950188E+04  8.3315438E+04  8.2680701E+04
  8.2045994E+04  8.1411337E+04  8.0776750E+04  8.0142251E+04
  7.9507861E+04  7.8873599E+04  7.8239486E+04  7.7605543E+04
  7.6971790E+04  7.6338249E+04  7.5704942E+04  7.5071889E+04
  7.4439113E+04  7.3806636E+04  7.3174480E+04  7.2542669E+04
  7.1911226E+04  7.1280173E+04  7.0649535E+04  7.0019336E+04
  6.9389599E+04  6.8760349E+04  6.8131612E+04  6.7503411E+04
  6.6875772E+04  6.6248722E+04  6.5622285E+04  6.4996488E+04
  6.4371357E+04  6.3746920E+04  6.3123203E+04  6.2500233E+04
  6.1878038E+04  6.1256647E+04  6.0636087E+04  6.0016386E+04
  5.9397574E+04  5.8779679E+04  5.8162731E+04  5.7546760E+04
  5.6931796E+04  5.6317868E+04  5.5705007E+04  5.5093244E+04
  5.4482611E+04  5.3873138E+04  5.3264857E+04  5.2657801E+04
  5.2052002E+04  5.1447491E+04  5.0844304E+04  5.0242471E+04
  4.9642028E+04  4.9043007E+04  4.8445444E+04  4.7849372E+04
  4.7254826E+04  4.6661841E+04  4.6070453E+04  4.5480697E+04
  4.4892610E+04  4.4306227E+04  4.3721585E+04  4.3138721E+04
  4.2557673E+04  4.1978477E+04  4.1401172E+04  4.0825796E+04
  4.0252388E+04  3.9680985E+04  3.9111628E+04  3.8544356E+04
  3.7979208E+04  3.7416224E+04  3.6855446E+04  3.6296913E+04
  3.5740667E+04  3.5186749E+04  3.4635200E+04  3.4086064E+04
  3.3539381E+04  3.2995195E+04  3.2453549E+04  3.1914485E+04
  3.1378048E+04  3.0844282E+04  3.0313231E+04  2.9784939E+04
  2.9259452E+04  2.8736814E+04  2.8217071E+04  2.7700270E+04
  2.7186456E+04  2.6675677E+04  2.6167978E+04  2.5663408E+04
  2.5162013E+04  2.4663843E+04  2.4168945E+04  2.3677367E+04
  2.3189159E+04  2.2704371E+04  2.2223051E+04  2.1745250E+04
  2.1271018E+04  2.0800405E+04  2.0333464E+04  1.9870244E+04
  1.9410799E+04  1.8955179E+04  1.8503437E+04  1.8055627E+04
  1.7611800E+04  1.7172011E+04  1.6736314E+04  1.6304761E+04
  1.5877409E+04  1.5454312E+04  1.5035525E+04  1.4621103E+04
  1.4211103E+04  1.3805580E+04  1.3404592E+04  1.3008195E+04
  1.2616447E+04  1.2229405E+04  1.1847128E+04  1.1469674E+04
  1.1097101E+04  1.0729468E+04  1.0366836E+04  1.0009264E+04
  9.6568123E+03  9.3095413E+03  8.9675121E+03  8.6307860E+03
  8.2994247E+03  7.9734902E+03  7.6530449E+03  7.3381516E+03
  7.0288734E+03  6.7252738E+03  6.4274169E+03  6.1353667E+03
  5.8491879E+03  5.5689456E+03  5.2947051E+03  5.0265322E+03
  4.7644929E+03  4.5086539E+03  4.2590819E+03  4.0158443E+03
  3.7790086E+03  3.5486429E+03  3.3248156E+03  3.1075954E+03
  2.8970515E+03  2.6932534E+03  2.4962711E+03  2.3061749E+03
  2.1230354E+03  1.9469237E+03  1.7779113E+03  1.6160701E+03
  1.4614721E+03  1.3141902E+03  1.1742972E+03  1.0418665E+03
  9.1697204E+02  7.9968790E+02  6.9008865E+02  5.8824927E+02
  4.9424510E+02  4.0815190E+02  3.3004581E+02  2.6000336E+02
  1.9810148E+02  1.4441752E+02  9.9029200E+01  6.2014643E+01
  3.3452377E+01  1.3421328E+01  2.0008222E+00 -1.9847136E+00
 -5.4026792E+00 -8.8169785E+00 -1.2227597E+01 -1.5634521E+01
 -1.9037736E+01 -2.2437227E+01 -2.5832981E+01 -2.9224983E+01
 -3.2613219E+01 -3.5997675E+01 -3.9378336E+01 -4.2755188E+01
 -4.6128217E+01 -4.9497409E+01 -5.2862749E+01 -5.6224223E+01
 -5.9581817E+01 -6.2935517E+01 -6.6285308E+01 -6.9631176E+01
 -7.2973107E+01 -7.6311087E+01 -7.9645101E+01 -8.2975135E+01
 -8.6301175E+01 -8.9623207E+01 -9.2941216E+01 -9.6255188E+01
 -9.9565109E+01 -1.0287096E+02 -1.0617274E+02 -1.0947042E+02
 -1.1276400E+02 -1.1605345E+02 -1.1933876E+02 -1.2261993E+02
 -1.2589692E+02 -1.2916974E+02 -1.3243837E+02 -1.3570279E+02
 -1.3896298E+02 -1.4221894E+02 -1.4547065E+02 -1.4871809E+02
 -1.5196125E+02 -1.5520012E+02 -1.5843469E+02 -1.6166493E+02
 -1.6489083E+02 -1.6811239E+02 -1.7132958E+02 -1.7454239E+02
 -1.7775080E+02 -1.8095481E+02 -1.8415440E+02 -1.8734955E+02
 -1.9054025E+02 -1.9372649E+02 -1.9690825E+02 -2.0008551E+02
 -2.0325827E+02 -2.0642651E+02 -2.0959021E+02 -2.1274936E+02
 -2.1590394E+02 -2.1905395E+02 -2.2219937E+02 -2.2534017E+02
 -2.2847636E+02 -2.3160791E+02 -2.3473481E+02 -2.3785705E+02
 -2.4097461E+02 -2.4408747E+02 -2.4719563E+02 -2.5029907E+02
 -2.5339778E+02 -2.5649173E+02 -2.5958092E+02 -2.6266533E+02
 -2.6574495E+02 -2.6881976E+02 -2.7188975E+02 -2.7495491E+02
 -2.7801522E+02 -2.8107066E+02 -2.8412123E+02 -2.8716690E+02
 -2.9020767E+02 -2.9324351E+02 -2.9627442E+02 -2.9930039E+02
 -3.0232139E+02 -3.0533741E+02 -3.0834844E+02 -3.1135446E+02
 -3.1435546E+02 -3.1735143E+02 -3.2034235E+02 -3.2332821E+02
 -3.2630899E+02 -3.2928467E+02 -3.3225526E+02 -3.3522072E+02
 -3.3818104E+02 -3.4113622E+02 -3.4408624E+02 -3.4703107E+02
 -3.4997072E+02 -3.5290516E+02 -3.5583438E+02 -3.5875837E+02
 -3.6167711E+02 -3.6459058E+02 -3.6749878E+02 -3.7040169E+02
 -3.7329929E+02 -3.7619157E+02 -3.7907852E+02 -3.8196012E+02
 -3.8483636E+02 -3.8770722E+02 -3.9057269E+02 -3.9343275E+02
 -3.9628740E+02 -3.9913661E+02 -4.0198037E+02 -4.0481867E+02
 -4.0765150E+02 -4.1047883E+02 -4.1330066E+02 -4.1611697E+02
 -4.1892774E+02 -4.2173297E+02 -4.2453264E+02 -4.2732673E+02
 -4.3011523E+02 -4.3289812E+02 -4.3567540E+02 -4.3844704E+02
 -4.4121303E+02 -4.4397337E+02 -4.4672802E+02 -4.4947699E+02
 -4.5222025E+02 -4.5495779E+02 -4.5768960E+02 -4.6041567E+02
 -4.6313597E+02 -4.6585049E+02 -4.6855923E+02 -4.7126216E+02
 -4.7395927E+02 -4.7665055E+02 -4.7933598E+02 -4.8201555E+02
 -4.8468925E+02 -4.8735705E+02 -4.9001895E+02 -4.9267493E+02
 -4.9532498E+02 -4.9796909E+02 -5.0060723E+02 -5.0323940E+02
 -5.0586557E+02 -5.0848575E+02 -5.1109990E+02 -5.1370802E+02
 -5.1631010E+02 -5.1890611E+02 -5.2149605E+02 -5.2407990E+02
 -5.2665765E+02 -5.2922928E+02 -5.3179478E+02 -5.3435413E+02
 -5.3690732E+02 -5.3945433E+02 -5.4199516E+02 -5.4452978E+02
 -5.4705818E+02 -5.4958036E+02 -5.5209628E+02 -5.5460595E+02
 -5.5710934E+02 -5.5960644E+02 -5.6209724E+02 -5.6458172E+02
 -5.6705987E+02 -5.6953167E+02 -5.7199712E+02 -5.7445619E+02
 -5.7690887E+02 -5.7935514E+02 -5.8179500E+02 -5.8422843E+02
 -5.8665541E+02 -5.8907594E+02 -5.9148998E+02 -5.9389754E+02
 -5.9629860E+02 -5.9869314E+02 -6.0108115E+02 -6.0346261E+02
 -6.0583752E+02 -6.0820585E+02 -6.1056759E+02 -6.1292273E+02
 -6.1527125E+02 -6.1761314E+02 -6.1994838E+02 -6.2227697E+02
 -6.2459888E+02 -6.2691411E+02 -6.2922263E+02 -6.3152443E+02
 -6.3381951E+02 -6.3610784E+02 -6.3838941E+02 -6.4066420E+02
 -6.4293221E+02 -6.4519342E+02 -6.4744781E+02 -6.4969537E+02
 -6.5193608E+02 -6.5416994E+02 -6.5639692E+02 -6.5861701E+02
 -6.6083021E+02 -6.6303648E+02 -6.6523583E+02 -6.6742823E+02
 -6.6961367E+02 -6.7179214E+02 -6.7396362E+02 -6.7612811E+02
 -6.7828557E+02 -6.8043600E+02 -6.8257939E+02 -6.8471573E+02
 -6.8684498E+02 -6.8896716E+02 -6.9108223E+02 -6.9319018E+02
 -6.9529100E+02 -6.9738468E+02 -6.9947121E+02 -7.0155055E+02
 -7.0362272E+02 -7.0568768E+02 -7.0774542E+02 -7.0979594E+02
 -7.1183921E+02 -7.1387522E+02 -7.1590397E+02 -7.1792542E+02
 -7.1993957E+02 -7.2194641E+02 -7.2394592E+02 -7.2593809E+02
 -7.2792289E+02 -7.2990033E+02 -7.3187038E+02 -7.3383302E+02
 -7.3578826E+02 -7.3773606E+02 -7.3967642E+02 -7.4160932E+02
 -7.4353475E+02 -7.4545270E+02 -7.4736314E+02 -7.4926607E+02
 -7.5116147E+02 -7.5304932E+02 -7.5492962E+02 -7.5680235E+02
 -7.5866749E+02 -7.6052503E+02 -7.6237496E+02 -7.6421725E+02
 -7.6605191E+02 -7.6787890E+02 -7.6969823E+02 -7.7150987E+02
 -7.7331381E+02 -7.7511003E+02 -7.7689853E+02 -7.7867929E+02
 -7.8045228E+02 -7.8221751E+02 -7.8397495E+02 -7.8572459E+02
 -7.8746641E+02 -7.8920041E+02 -7.9092657E+02 -7.9264486E+02
 -7.9435529E+02 -7.9605783E+02 -7.9775247E+02 -7.9943920E+02
 -8.0111800E+02 -8.0278886E+02 -8.0445176E+02 -8.0610669E+02
 -8.0775364E+02 -8.0939258E+02 -8.1102351E+02 -8.1264642E+02
 -8.1426128E+02 -8.1586809E+02 -8.1746682E+02 -8.1905747E+02
 -8.2064002E+02 -8.2221446E+02 -8.2378077E+02 -8.2533894E+02
 -8.2688895E+02 -8.2843079E+02 -8.2996444E+02 -8.3148990E+02
 -8.3300715E+02 -8.3451616E+02 -8.3601694E+02 -8.3750946E+02
 -8.3899371E+02 -8.4046967E+02 -8.4193734E+02 -8.4339669E+02
 -8.4484772E+02 -8.4629040E+02 -8.4772473E+02 -8.4915069E+02
 -8.5056826E+02 -8.5197744E+02 -8.5337820E+02 -8.5477054E+02
 -8.5615443E+02 -8.5752987E+02 -8.5889684E+02 -8.6025533E+02
 -8.6160531E+02 -8.6294679E+02 -8.6427974E+02 -8.6560414E+02
 -8.6692000E+02 -8.6822728E+02 -8.6952598E+02 -8.7081608E+02
 -8.7209757E+02 -8.7337043E+02 -8.7463465E+02 -8.7589021E+02
 -8.7713711E+02 -8.7837532E+02 -8.7960484E+02 -8.8082564E+02
 -8.8203772E+02 -8.8324105E+02 -8.8443563E+02 -8.8562145E+02
 -8.8679848E+02 -8.8796671E+02 -8.8912613E+02 -8.9027672E+02
 -8.9141847E+02 -8.9255137E+02 -8.9367540E+02 -8.9479055E+02
 -8.9589680E+02 -8.9699413E+02 -8.9808255E+02 -8.9916202E+02
 -9.0023253E+02 -9.0129408E+02 -9.0234665E+02 -9.0339022E+02
 -9.0442477E+02 -9.0545031E+02 -9.0646680E+02 -9.0747423E+02
 -9.0847260E+02 -9.0946189E+02 -9.1044208E+02 -9.1141316E+02
 -9.1237511E+02 -9.1332792E+02 -9.1427158E+02 -9.1520607E+02
 -9.1613138E+02 -9.1704750E+02 -9.1795440E+02 -9.1885207E+02
 -9.1974051E+02 -9.2061969E+02 -9.2148961E+02 -9.2235024E+02
 -9.2320158E+02 -9.2404360E+02 -9.2487630E+02 -9.2569966E+02
 -9.2651367E+02 -9.2731831E+02 -9.2811357E+02 -9.2889943E+02
 -9.2967588E+02 -9.3044291E+02 -9.3120050E+02 -9.3194863E+02
 -9.3268730E+02 -9.3341648E+02 -9.3413617E+02 -9.3484635E+02
 -9.3554700E+02 -9.3623812E+02 -9.3691968E+02 -9.3759168E+02
 -9.3825409E+02 -9.3890691E+02 -9.3955012E+02 -9.4018370E+02
 -9.4080765E+02 -9.4142194E+02 -9.4202656E+02 -9.4262151E+02
 -9.4320676E+02 -9.4378229E+02 -9.4434811E+02 -9.4490419E+02
 -9.4545051E+02 -9.4598707E+02 -9.4651384E+02 -9.4703082E+02
 -9.4753799E+02 -9.4803534E+02 -9.4852285E+02 -9.4900050E+02
 -9.4946829E+02 -9.4992620E+02 -9.5037422E+02 -9.5081232E+02
 -9.5124050E+02 -9.5165875E+02 -9.5206704E+02 -9.5246536E+02
 -9.5285371E+02 -9.5323206E+02 -9.5360040E+02 -9.5395871E+02
 -9.5430699E+02 -9.5464522E+02 -9.5497338E+02 -9.5529146E+02
 -9.5559945E+02 -9.5589732E+02 -9.5618508E+02 -9.5646269E+02
 -9.5673016E+02 -9.5698746E+02 -9.5723458E+02 -9.5747150E+02
 -9.5769821E+02 -9.5791471E+02 -9.5812096E+02 -9.5831697E+02
 -9.5850271E+02 -9.5867816E+02 -9.5884333E+02 -9.5899818E+02
 -9.5914272E+02 -9.5927691E+02 -9.5940076E+02 -9.5951424E+02
 -9.5961734E+02 -9.5971004E+02 -9.5979234E+02 -9.5986421E+02
 -9.5992565E+02 -9.5997664E+02 -9.6001716E+02 -9.6004720E+02
 -9.6006675E+02 -9.6007579E+02 -9.6007431E+02 -9.6006229E+02
 -9.6003972E+02 -9.6000659E+02 -9.5996288E+02 -9.5990857E+02
 -9.5984366E+02 -9.5976812E+02 -9.5968195E+02 -9.5958512E+02
 -9.5947763E+02 -9.5935947E+02 -9.5923061E+02 -9.5909104E+02
 -9.5894075E+02 -9.5877972E+02 -9.5860795E+02 -9.5842541E+02
 -9.5823209E+02 -9.5802797E+02 -9.5781305E+02 -9.5758731E+02
 -9.5735073E+02 -9.5710331E+02 -9.5684501E+02 -9.5657584E+02
 -9.5629578E+02 -9.5600481E+02 -9.5570292E+02 -9.5539009E+02
 -9.5506631E+02 -9.5473157E+02 -9.5438585E+02 -9.5402914E+02
 -9.5366142E+02 -9.5328268E+02 -9.5289290E+02 -9.5249208E+02
 -9.5208019E+02 -9.5165722E+02 -9.5122316E+02 -9.5077799E+02
 -9.5032171E+02 -9.4985428E+02 -9.4937571E+02 -9.4888598E+02
 -9.4838506E+02 -9.4787296E+02 -9.4734965E+02 -9.4681511E+02
 -9.4626934E+02 -9.4571233E+02 -9.4514405E+02 -9.4456449E+02
 -9.4397364E+02 -9.4337148E+02 -9.4275801E+02 -9.4213319E+02
 -9.4149703E+02 -9.4084951E+02 -9.4019061E+02 -9.3952032E+02
 -9.3883862E+02 -9.3814550E+02 -9.3744094E+02 -9.3672494E+02
 -9.3599748E+02 -9.3525853E+02 -9.3450810E+02 -9.3374616E+02
 -9.3297270E+02 -9.3218771E+02 -9.3139116E+02 -9.3058306E+02
 -9.2976337E+02 -9.2893210E+02 -9.2808922E+02 -9.2723472E+02
 -9.2636859E+02 -9.2549081E+02 -9.2460136E+02 -9.2370024E+02
 -9.2278743E+02 -9.2186292E+02 -9.2092668E+02 -9.1997871E+02
 -9.1901899E+02 -9.1804751E+02 -9.1706425E+02 -9.1606920E+02
 -9.1506235E+02 -9.1404368E+02 -9.1301317E+02 -9.1197082E+02
 -9.1091660E+02 -9.0985051E+02 -9.0877253E+02 -9.0768264E+02
 -9.0658083E+02 -9.0546709E+02 -9.0434140E+02 -9.0320375E+02
 -9.0205413E+02 -9.0089251E+02 -8.9971889E+02 -8.9853325E+02
 -8.9733558E+02 -8.9612586E+02 -8.9490408E+02 -8.9367022E+02
 -8.9242427E+02 -8.9116622E+02 -8.8989605E+02 -8.8861374E+02
 -8.8731929E+02 -8.8601268E+02 -8.8469389E+02 -8.8336291E+02
 -8.8201973E+02 -8.8066433E+02 -8.7929670E+02 -8.7791682E+02
 -8.7652467E+02 -8.7512026E+02 -8.7370355E+02 -8.7227454E+02
 -8.7083321E+02 -8.6937955E+02 -8.6791354E+02 -8.6643517E+02
 -8.6494443E+02 -8.6344129E+02 -8.6192576E+02 -8.6039780E+02
 -8.5885741E+02 -8.5730458E+02 -8.5573929E+02 -8.5416152E+02
 -8.5257126E+02 -8.5096849E+02 -8.4935321E+02 -8.4772540E+02
 -8.4608504E+02 -8.4443212E+02 -8.4276663E+02 -8.4108855E+02
 -8.3939786E+02 -8.3769456E+02 -8.3597862E+02 -8.3425004E+02
 -8.3250880E+02 -8.3075488E+02 -8.2898828E+02 -8.2720897E+02
 -8.2541694E+02 -8.2361219E+02 -8.2179468E+02 -8.1996442E+02
 -8.1812138E+02 -8.1626556E+02 -8.1439693E+02 -8.1251548E+02
 -8.1062121E+02 -8.0871408E+02 -8.0679410E+02 -8.0486124E+02
 -8.0291550E+02 -8.0095685E+02 -7.9898529E+02 -7.9700079E+02
 -7.9500335E+02 -7.9299295E+02 -7.9096958E+02 -7.8893321E+02
 -7.8687502E+02 -7.8482631E+02 -7.8278383E+02 -7.8074754E+02
 -7.7871743E+02 -7.7669347E+02 -7.7467565E+02 -7.7266394E+02
 -7.7065833E+02 -7.6865878E+02 -7.6666529E+02 -7.6467782E+02
 -7.6269636E+02 -7.6072089E+02 -7.5875139E+02 -7.5678783E+02
 -7.5483020E+02 -7.5287848E+02 -7.5093264E+02 -7.4899266E+02
 -7.4705853E+02 -7.4513022E+02 -7.4320772E+02 -7.4129100E+02
 -7.3938005E+02 -7.3747484E+02 -7.3557536E+02 -7.3368158E+02
 -7.3179349E+02 -7.2991106E+02 -7.2803428E+02 -7.2616313E+02
 -7.2429759E+02 -7.2243763E+02 -7.2058325E+02 -7.1873442E+02
 -7.1689111E+02 -7.1505333E+02 -7.1322103E+02 -7.1139421E+02
 -7.0957285E+02 -7.0775693E+02 -7.0594642E+02 -7.0414132E+02
 -7.0234160E+02 -7.0054724E+02 -6.9875823E+02 -6.9697454E+02
 -6.9519617E+02 -6.9342309E+02 -6.9165528E+02 -6.8989273E+02
 -6.8813541E+02 -6.8638332E+02 -6.8463643E+02 -6.8289472E+02
 -6.8115818E+02 -6.7942679E+02 -6.7770053E+02 -6.7597939E+02
 -6.7426334E+02 -6.7255238E+02 -6.7084648E+02 -6.6914562E+02
 -6.6744979E+02 -6.6575898E+02 -6.6407316E+02 -6.6239231E+02
 -6.6071643E+02 -6.5904550E+02 -6.5737949E+02 -6.5571839E+02
 -6.5406219E+02 -6.5241086E+02 -6.5076440E+02 -6.4912279E+02
 -6.4748600E+02 -6.4585402E+02 -6.4422685E+02 -6.4260445E+02
 -6.4098682E+02 -6.3937394E+02 -6.3776579E+02 -6.3616235E+02
 -6.3456362E+02 -6.3296958E+02 -6.3138020E+02 -6.2979548E+02
 -6.2821539E+02 -6.2663993E+02 -6.2506908E+02 -6.2350282E+02
 -6.2194113E+02 -6.2038401E+02 -6.1883143E+02 -6.1728339E+02
 -6.1573986E+02 -6.1420083E+02 -6.1266629E+02 -6.1113622E+02
 -6.0961060E+02 -6.0808943E+02 -6.0657268E+02 -6.0506035E+02
 -6.0355241E+02 -6.0204885E+02 -6.0054967E+02 -5.9905483E+02
 -5.9756434E+02 -5.9607817E+02 -5.9459631E+02 -5.9311875E+02
 -5.9164547E+02 -5.9017645E+02 -5.8871169E+02 -5.8725117E+02
 -5.8579488E+02 -5.8434279E+02 -5.8289491E+02 -5.8145121E+02
 -5.8001167E+02 -5.7857630E+02 -5.7714507E+02 -5.7571796E+02
 -5.7429497E+02 -5.7287609E+02 -5.7146129E+02 -5.7005056E+02
 -5.6864390E+02 -5.6724128E+02 -5.6584270E+02 -5.6444814E+02
 -5.6305759E+02 -5.6167104E+02 -5.6028846E+02 -5.5890986E+02
 -5.5753521E+02 -5.5616450E+02 -5.5479772E+02 -5.5343486E+02
 -5.5207591E+02 -5.5072084E+02 -5.4936966E+02 -5.4802234E+02
 -5.4667887E+02 -5.4533925E+02 -5.4400345E+02 -5.4267147E+02
 -5.4134329E+02 -5.4001891E+02 -5.3869830E+02 -5.3738146E+02
 -5.3606837E+02 -5.3475902E+02 -5.3345341E+02 -5.3215151E+02
 -5.3085331E+02 -5.2955881E+02 -5.2826799E+02 -5.2698084E+02
 -5.2569735E+02 -5.2441751E+02 -5.2314129E+02 -5.2186870E+02
 -5.2059972E+02 -5.1933434E+02 -5.1807254E+02 -5.1681432E+02
 -5.1555966E+02 -5.1430856E+02 -5.1306100E+02 -5.1181696E+02
 -5.1057644E+02 -5.0933943E+02 -5.0810592E+02 -5.0687589E+02
 -5.0564933E+02 -5.0442623E+02 -5.0320658E+02 -5.0199037E+02
 -5.0077759E+02 -4.9956823E+02 -4.9836227E+02 -4.9715971E+02
 -4.9596053E+02 -4.9476472E+02 -4.9357228E+02 -4.9238319E+02
 -4.9119744E+02 -4.9001502E+02 -4.8883592E+02 -4.8766012E+02
 -4.8648763E+02 -4.8531842E+02 -4.8415249E+02 -4.8298983E+02
 -4.8183042E+02 -4.8067426E+02 -4.7952134E+02 -4.7837163E+02
 -4.7722515E+02 -4.7608187E+02 -4.7494178E+02 -4.7380487E+02
 -4.7267114E+02 -4.7154058E+02 -4.7041317E+02 -4.6928890E+02
 -4.6816776E+02 -4.6704975E+02 -4.6593485E+02 -4.6482306E+02
 -4.6371436E+02 -4.6260874E+02 -4.6150620E+02 -4.6040672E+02
 -4.5931029E+02 -4.5821692E+02 -4.5712657E+02 -4.5603925E+02
 -4.5495495E+02 -4.5387366E+02 -4.5279536E+02 -4.5172005E+02
 -4.5064772E+02 -4.4957836E+02 -4.4851195E+02 -4.4744850E+02
 -4.4638798E+02 -4.4533040E+02 -4.4427574E+02 -4.4322400E+02
 -4.4217515E+02 -4.4112920E+02 -4.4008614E+02 -4.3904595E+02
 -4.3800863E+02 -4.3697417E+02 -4.3594256E+02 -4.3491378E+02
 -4.3388784E+02 -4.3286472E+02 -4.3184442E+02 -4.3082692E+02
 -4.2981221E+02 -4.2880030E+02 -4.2779116E+02 -4.2678479E+02
 -4.2578118E+02 -4.2478032E+02 -4.2378221E+02 -4.2278683E+02
 -4.2179418E+02 -4.2080425E+02 -4.1981702E+02 -4.1883250E+02
 -4.1785067E+02 -4.1687153E+02 -4.1589506E+02 -4.1492125E+02
 -4.1395011E+02 -4.1298162E+02 -4.1201577E+02 -4.1105255E+02
 -4.1009196E+02 -4.0913399E+02 -4.0817863E+02 -4.0722587E+02
 -4.0627570E+02 -4.0532812E+02 -4.0438311E+02 -4.0344068E+02
 -4.0250081E+02 -4.0156349E+02 -4.0062871E+02 -3.9969648E+02
 -3.9876677E+02 -3.9783959E+02 -3.9691492E+02 -3.9599275E+02
 -3.9507309E+02 -3.9415591E+02 -3.9324122E+02 -3.9232900E+02
 -3.9141926E+02 -3.9051197E+02 -3.8960713E+02 -3.8870474E+02
 -3.8780479E+02 -3.8690727E+02 -3.8601217E+02 -3.8511948E+02
 -3.8422920E+02 -3.8334133E+02 -3.8245584E+02 -3.8157274E+02
 -3.8069202E+02 -3.7981367E+02 -3.7893768E+02 -3.7806405E+02
 -3.7719277E+02 -3.7632383E+02 -3.7545722E+02 -3.7459294E+02
 -3.7373099E+02 -3.7287134E+02 -3.7201400E+02 -3.7115896E+02
 -3.7030621E+02 -3.6945575E+02 -3.6860756E+02 -3.6776165E+02
 -3.6691800E+02 -3.6607660E+02 -3.6523746E+02 -3.6440056E+02
 -3.6356589E+02 -3.6273346E+02 -3.6190325E+02 -3.6107525E+02
 -3.6024947E+02 -3.5942588E+02 -3.5860449E+02 -3.5778530E+02
 -3.5696828E+02 -3.5615344E+02 -3.5534077E+02 -3.5453026E+02
 -3.5372191E+02 -3.5291570E+02 -3.5211164E+02 -3.5130972E+02
 -3.5050992E+02 -3.4971225E+02 -3.4891670E+02 -3.4812326E+02
 -3.4733192E+02 -3.4654268E+02 -3.4575553E+02 -3.4497046E+02
 -3.4418748E+02 -3.4340656E+02 -3.4262772E+02 -3.4185093E+02
 -3.4107620E+02 -3.4030351E+02 -3.3953287E+02 -3.3876426E+02
 -3.3799768E+02 -3.3723313E+02 -3.3647059E+02 -3.3571006E+02
 -3.3495153E+02 -3.3419501E+02 -3.3344048E+02 -3.3268793E+02
 -3.3193737E+02 -3.3118878E+02 -3.3044216E+02 -3.2969750E+02
 -3.2895480E+02 -3.2821405E+02 -3.2747524E+02 -3.2673838E+02
 -3.2600345E+02 -3.2527044E+02 -3.2453936E+02 -3.2381020E+02
 -3.2308294E+02 -3.2235759E+02 -3.2163414E+02 -3.2091259E+02
 -3.2019292E+02 -3.1947513E+02 -3.1875922E+02 -3.1804518E+02
 -3.1733301E+02 -3.1662269E+02 -3.1591423E+02 -3.1520762E+02
 -3.1450285E+02 -3.1379992E+02 -3.1309882E+02 -3.1239955E+02
 -3.1170210E+02 -3.1100647E+02 -3.1031265E+02 -3.0962063E+02
 -3.0893041E+02 -3.0824198E+02 -3.0755535E+02 -3.0687050E+02
 -3.0618743E+02 -3.0550613E+02 -3.0482660E+02 -3.0414883E+02
 -3.0347282E+02 -3.0279856E+02 -3.0212604E+02 -3.0145527E+02
 -3.0078624E+02 -3.0011894E+02 -2.9945337E+02 -2.9878951E+02
 -2.9812737E+02 -2.9746695E+02 -2.9680823E+02 -2.9615121E+02
 -2.9549589E+02 -2.9484226E+02 -2.9419031E+02 -2.9354005E+02
 -2.9289146E+02 -2.9224454E+02 -2.9159929E+02 -2.9095571E+02
 -2.9031377E+02 -2.8967349E+02 -2.8903486E+02 -2.8839787E+02
 -2.8776252E+02 -2.8712879E+02 -2.8649670E+02 -2.8586623E+02
 -2.8523738E+02 -2.8461014E+02 -2.8398451E+02 -2.8336048E+02
 -2.8273805E+02 -2.8211722E+02 -2.8149797E+02 -2.8088031E+02
 -2.8026424E+02 -2.7964973E+02 -2.7903680E+02 -2.7842544E+02
 -2.7781564E+02 -2.7720739E+02 -2.7660070E+02 -2.7599556E+02
 -2.7539196E+02 -2.7478990E+02 -2.7418938E+02 -2.7359038E+02
 -2.7299292E+02 -2.7239697E+02 -2.7180254E+02 -2.7120963E+02
 -2.7061822E+02 -2.7002832E+02 -2.6943991E+02 -2.6885300E+02
 -2.6826759E+02 -2.6768366E+02 -2.6710121E+02 -2.6652024E+02
 -2.6594074E+02 -2.6536271E+02 -2.6478615E+02 -2.6421105E+02
 -2.6363741E+02 -2.6306522E+02 -2.6249447E+02 -2.6192517E+02
 -2.6135731E+02 -2.6079089E+02 -2.6022590E+02 -2.5966233E+02
 -2.5910019E+02 -2.5853947E+02 -2.5798017E+02 -2.5742227E+02
 -2.5686578E+02 -2.5631070E+02 -2.5575701E+02 -2.5520472E+02
 -2.5465382E+02 -2.5410431E+02 -2.5355617E+02 -2.5300942E+02
 -2.5246405E+02 -2.5192004E+02 -2.5137740E+02 -2.5083613E+02
 -2.5029621E+02 -2.4975765E+02 -2.4922044E+02 -2.4868458E+02
 -2.4815006E+02 -2.4761688E+02 -2.4708504E+02 -2.4655453E+02
 -2.4602535E+02 -2.4549749E+02 -2.4497096E+02 -2.4444574E+02
 -2.4392183E+02 -2.4339924E+02 -2.4287795E+02 -2.4235796E+02
 -2.4183927E+02 -2.4132187E+02 -2.4080577E+02 -2.4029095E+02
 -2.3977742E+02 -2.3926516E+02 -2.3875419E+02 -2.3824448E+02
 -2.3773605E+02 -2.3722888E+02 -2.3672297E+02 -2.3621832E+02
 -2.3571492E+02 -2.3521278E+02 -2.3471188E+02 -2.3421223E+02
 -2.3371382E+02 -2.3321664E+02 -2.3272070E+02 -2.3222599E+02
 -2.3173250E+02 -2.3124024E+02 -2.3074920E+02 -2.3025937E+02
 -2.2977076E+02 -2.2928335E+02 -2.2879716E+02 -2.2831216E+02
 -2.2782836E+02 -2.2734576E+02 -2.2686435E+02 -2.2638413E+02
 -2.2590509E+02 -2.2542724E+02 -2.2495057E+02 -2.2447507E+02
 -2.2400074E+02 -2.2352758E+02 -2.2305559E+02 -2.2258476E+02
 -2.2211509E+02 -2.2164658E+02 -2.2117922E+02 -2.2071300E+02
 -2.2024794E+02 -2.1978401E+02 -2.1932123E+02 -2.1885958E+02
 -2.1839907E+02 -2.1793968E+02 -2.1748142E+02 -2.1702429E+02
 -2.1656828E+02 -2.1611338E+02 -2.1565960E+02 -2.1520693E+02
 -2.1475537E+02 -2.1430491E+02 -2.1385556E+02 -2.1340730E+02
 -2.1296014E+02 -2.1251407E+02 -2.1206910E+02 -2.1162520E+02
 -2.1118240E+02 -2.1074067E+02 -2.1030002E+02 -2.0986045E+02
 -2.0942194E+02 -2.0898451E+02 -2.0854814E+02 -2.0811283E+02
 -2.0767859E+02 -2.0724540E+02 -2.0681326E+02 -2.0638217E+02
 -2.0595214E+02 -2.0552314E+02 -2.0509519E+02 -2.0466828E+02
 -2.0424241E+02 -2.0381757E+02 -2.0339376E+02 -2.0297097E+02
 -2.0254922E+02 -2.0212848E+02 -2.0170876E+02 -2.0129006E+02
 -2.0087238E+02 -2.0045570E+02 -2.0004004E+02 -1.9962537E+02
 -1.9921171E+02 -1.9879905E+02 -1.9838739E+02 -1.9797672E+02
 -1.9756704E+02 -1.9715835E+02 -1.9675065E+02 -1.9634393E+02
 -1.9593819E+02 -1.9553343E+02 -1.9512965E+02 -1.9472683E+02
 -1.9432499E+02 -1.9392411E+02 -1.9352420E+02 -1.9312525E+02
 -1.9272726E+02 -1.9233022E+02 -1.9193414E+02 -1.9153901E+02
 -1.9114483E+02 -1.9075160E+02 -1.9035931E+02 -1.8996796E+02
 -1.8957755E+02 -1.8918807E+02 -1.8879953E+02 -1.8841191E+02
 -1.8802523E+02 -1.8763947E+02 -1.8725464E+02 -1.8687072E+02
 -1.8648772E+02 -1.8610564E+02 -1.8572447E+02 -1.8534422E+02
 -1.8496487E+02 -1.8458642E+02 -1.8420888E+02 -1.8383224E+02
 -1.8345650E+02 -1.8308165E+02 -1.8270769E+02 -1.8233463E+02
 -1.8196246E+02 -1.8159117E+02 -1.8122076E+02 -1.8085124E+02
 -1.8048259E+02 -1.8011483E+02 -1.7974793E+02 -1.7938191E+02
 -1.7901675E+02 -1.7865247E+02 -1.7828904E+02 -1.7792648E+02
 -1.7756478E+02 -1.7720394E+02 -1.7684395E+02 -1.7648482E+02
 -1.7612653E+02 -1.7576910E+02 -1.7541251E+02 -1.7505676E+02
 -1.7470186E+02 -1.7434779E+02 -1.7399456E+02 -1.7364217E+02
 -1.7329061E+02 -1.7293988E+02 -1.7258997E+02 -1.7224090E+02
 -1.7189264E+02 -1.7154521E+02 -1.7119859E+02 -1.7085280E+02
 -1.7050781E+02 -1.7016364E+02 -1.6982028E+02 -1.6947773E+02
 -1.6913598E+02 -1.6879504E+02 -1.6845490E+02 -1.6811556E+02
 -1.6777702E+02 -1.6743927E+02 -1.6710231E+02 -1.6676614E+02
 -1.6643077E+02 -1.6609618E+02 -1.6576237E+02 -1.6542935E+02
 -1.6509711E+02 -1.6476564E+02 -1.6443495E+02 -1.6410504E+02
 -1.6377590E+02 -1.6344752E+02 -1.6311992E+02 -1.6279308E+02
 -1.6246700E+02 -1.6214169E+02 -1.6181714E+02 -1.6149334E+02
 -1.6117030E+02 -1.6084801E+02 -1.6052648E+02 -1.6020569E+02
 -1.5988565E+02 -1.5956636E+02 -1.5924781E+02 -1.5893001E+02
 -1.5861294E+02 -1.5829661E+02 -1.5798102E+02 -1.5766616E+02
 -1.5735203E+02 -1.5703863E+02 -1.5672596E+02 -1.5641402E+02
 -1.5610280E+02 -1.5579230E+02 -1.5548252E+02 -1.5517346E+02
 -1.5486512E+02 -1.5455749E+02 -1.5425058E+02 -1.5394437E+02
 -1.5363888E+02 -1.5333409E+02 -1.5303000E+02 -1.5272662E+02
 -1.5242395E+02 -1.5212197E+02 -1.5182068E+02 -1.5152010E+02
 -1.5122021E+02 -1.5092101E+02 -1.5062250E+02 -1.5032468E+02
 -1.5002755E+02 -1.4973110E+02 -1.4943533E+02 -1.4914025E+02
 -1.4884585E+02 -1.4855212E+02 -1.4825907E+02 -1.4796669E+02
 -1.4767499E+02 -1.4738396E+02 -1.4709359E+02 -1.4680390E+02
 -1.4651487E+02 -1.4622650E+02 -1.4593879E+02 -1.4565175E+02
 -1.4536536E+02 -1.4507963E+02 -1.4479455E+02 -1.4451013E+02
 -1.4422636E+02 -1.4394324E+02 -1.4366077E+02 -1.4337894E+02
 -1.4309776E+02 -1.4281722E+02 -1.4253733E+02 -1.4225807E+02
 -1.4197945E+02 -1.4170147E+02 -1.4142412E+02 -1.4114741E+02
 -1.4087132E+02 -1.4059587E+02 -1.4032105E+02 -1.4004685E+02
 -1.3977328E+02 -1.3950032E+02 -1.3922800E+02 -1.3895629E+02
 -1.3868520E+02 -1.3841472E+02 -1.3814487E+02 -1.3787562E+02
 -1.3760699E+02 -1.3733897E+02 -1.3707155E+02 -1.3680475E+02
 -1.3653855E+02 -1.3627295E+02 -1.3600796E+02 -1.3574357E+02
 -1.3547977E+02 -1.3521658E+02 -1.3495398E+02 -1.3469198E+02
 -1.3443056E+02 -1.3416975E+02 -1.3390952E+02 -1.3364988E+02
 -1.3339082E+02 -1.3313236E+02 -1.3287447E+02 -1.3261717E+02
 -1.3236045E+02 -1.3210431E+02 -1.3184875E+02 -1.3159376E+02
 -1.3133935E+02 -1.3108552E+02 -1.3083225E+02 -1.3057956E+02
 -1.3032743E+02 -1.3007588E+02 -1.2982489E+02 -1.2957446E+02
 -1.2932460E+02 -1.2907530E+02 -1.2882656E+02 -1.2857838E+02
 -1.2833075E+02 -1.2808369E+02 -1.2783718E+02 -1.2759122E+02
 -1.2734581E+02 -1.2710095E+02 -1.2685665E+02 -1.2661289E+02
 -1.2636967E+02 -1.2612700E+02 -1.2588488E+02 -1.2564330E+02
 -1.2540225E+02 -1.2516175E+02 -1.2492179E+02 -1.2468236E+02
 -1.2444346E+02 -1.2420511E+02 -1.2396728E+02 -1.2372998E+02
 -1.2349322E+02 -1.2325698E+02 -1.2302127E+02 -1.2278608E+02
 -1.2255142E+02 -1.2231729E+02 -1.2208367E+02 -1.2185058E+02
 -1.2161800E+02 -1.2138594E+02 -1.2115440E+02 -1.2092337E+02
 -1.2069286E+02 -1.2046286E+02 -1.2023337E+02 -1.2000439E+02
 -1.1977592E+02 -1.1954795E+02 -1.1932050E+02 -1.1909354E+02
 -1.1886709E+02 -1.1864115E+02 -1.1841570E+02 -1.1819075E+02
 -1.1796631E+02 -1.1774236E+02 -1.1751890E+02 -1.1729594E+02
 -1.1707347E+02 -1.1685150E+02 -1.1663001E+02 -1.1640902E+02
 -1.1618851E+02 -1.1596849E+02 -1.1574896E+02 -1.1552991E+02
 -1.1531134E+02 -1.1509326E+02 -1.1487566E+02 -1.1465854E+02
 -1.1444189E+02 -1.1422573E+02 -1.1401004E+02 -1.1379482E+02
 -1.1358008E+02 -1.1336582E+02 -1.1315202E+02 -1.1293869E+02
 -1.1272583E+02 -1.1251344E+02 -1.1230152E+02 -1.1209006E+02
 -1.1187907E+02 -1.1166854E+02 -1.1145847E+02 -1.1124887E+02
 -1.1103972E+02 -1.1083103E+02 -1.1062280E+02 -1.1041503E+02
 -1.1020771E+02 -1.1000084E+02 -1.0979443E+02 -1.0958847E+02
 -1.0938296E+02 -1.0917789E+02 -1.0897328E+02 -1.0876912E+02
 -1.0856540E+02 -1.0836212E+02 -1.0815929E+02 -1.0795691E+02
 -1.0775496E+02 -1.0755345E+02 -1.0735239E+02 -1.0715176E+02
 -1.0695157E+02 -1.0675182E+02 -1.0655250E+02 -1.0635361E+02
 -1.0615516E+02 -1.0595714E+02 -1.0575955E+02 -1.0556239E+02
 -1.0536566E+02 -1.0516936E+02 -1.0497348E+02 -1.0477803E+02
 -1.0458301E+02 -1.0438840E+02 -1.0419422E+02 -1.0400046E+02
 -1.0380712E+02 -1.0361420E+02 -1.0342170E+02 -1.0322962E+02
 -1.0303795E+02 -1.0284669E+02 -1.0265585E+02 -1.0246543E+02
 -1.0227541E+02 -1.0208581E+02 -1.0189662E+02 -1.0170783E+02
 -1.0151945E+02 -1.0133148E+02 -1.0114392E+02 -1.0095676E+02
 -1.0077001E+02 -1.0058365E+02 -1.0039770E+02 -1.0021215E+02
 -1.0002700E+02 -9.9842255E+01 -9.9657902E+01 -9.9473947E+01
 -9.9290387E+01 -9.9107223E+01 -9.8924452E+01 -9.8742075E+01
 -9.8560090E+01 -9.8378496E+01 -9.8197293E+01 -9.8016478E+01
 -9.7836052E+01 -9.7656014E+01 -9.7476361E+01 -9.7297095E+01
 -9.7118212E+01 -9.6939714E+01 -9.6761597E+01 -9.6583863E+01
 -9.6406509E+01 -9.6229536E+01 -9.6052941E+01 -9.5876724E+01
 -9.5700884E+01 -9.5525420E+01 -9.5350332E+01 -9.5175617E+01
 -9.5001276E+01 -9.4827308E+01 -9.4653711E+01 -9.4480485E+01
 -9.4307628E+01 -9.4135141E+01 -9.3963021E+01 -9.3791269E+01
 -9.3619882E+01 -9.3448861E+01 -9.3278204E+01 -9.3107911E+01
 -9.2937980E+01 -9.2768411E+01 -9.2599203E+01 -9.2430355E+01
 -9.2261865E+01 -9.2093734E+01 -9.1925961E+01 -9.1758544E+01
 -9.1591482E+01 -9.1424776E+01 -9.1258423E+01 -9.1092423E+01
 -9.0926775E+01 -9.0761479E+01 -9.0596533E+01 -9.0431937E+01
 -9.0267689E+01 -9.0103790E+01 -8.9940237E+01 -8.9777031E+01
 -8.9614170E+01 -8.9451654E+01 -8.9289482E+01 -8.9127652E+01
 -8.8966165E+01 -8.8805019E+01 -8.8644213E+01 -8.8483747E+01
 -8.8323619E+01 -8.8163830E+01 -8.8004378E+01 -8.7845262E+01
 -8.7686481E+01 -8.7528036E+01 -8.7369924E+01 -8.7212145E+01
 -8.7054699E+01 -8.6897584E+01 -8.6740800E+01 -8.6584346E+01
 -8.6428221E+01 -8.6272424E+01 -8.6116955E+01 -8.5961813E+01
 -8.5806997E+01 -8.5652505E+01 -8.5498339E+01 -8.5344496E+01
 -8.5190975E+01 -8.5037777E+01 -8.4884900E+01 -8.4732344E+01
 -8.4580107E+01 -8.4428190E+01 -8.4276591E+01 -8.4125309E+01
 -8.3974344E+01 -8.3823695E+01 -8.3673361E+01 -8.3523341E+01
 -8.3373636E+01 -8.3224243E+01 -8.3075162E+01 -8.2926393E+01
 -8.2777935E+01 -8.2629786E+01 -8.2481947E+01 -8.2334417E+01
 -8.2187194E+01 -8.2040278E+01 -8.1893668E+01 -8.1747364E+01
 -8.1601365E+01 -8.1455670E+01 -8.1310279E+01 -8.1165190E+01
 -8.1020403E+01 -8.0875917E+01 -8.0731732E+01 -8.0587846E+01
 -8.0444260E+01 -8.0300972E+01 -8.0157982E+01 -8.0015288E+01
 -7.9872891E+01 -7.9730790E+01 -7.9588983E+01 -7.9447471E+01
 -7.9306252E+01 -7.9165326E+01 -7.9024691E+01 -7.8884349E+01
 -7.8744297E+01 -7.8604535E+01 -7.8465062E+01 -7.8325878E+01
 -7.8186982E+01 -7.8048373E+01 -7.7910050E+01 -7.7772014E+01
 -7.7634263E+01 -7.7496796E+01 -7.7359614E+01 -7.7222714E+01
 -7.7086097E+01 -7.6949762E+01 -7.6813709E+01 -7.6677935E+01
 -7.6542442E+01 -7.6407228E+01 -7.6272293E+01 -7.6137635E+01
 -7.6003255E+01 -7.5869151E+01 -7.5735323E+01 -7.5601771E+01
 -7.5468493E+01 -7.5335490E+01 -7.5202760E+01 -7.5070302E+01
 -7.4938117E+01 -7.4806203E+01 -7.4674560E+01 -7.4543187E+01
 -7.4412083E+01 -7.4281249E+01 -7.4150683E+01 -7.4020385E+01
 -7.3890353E+01 -7.3760588E+01 -7.3631089E+01 -7.3501855E+01
 -7.3372886E+01 -7.3244180E+01 -7.3115738E+01 -7.2987558E+01
 -7.2859641E+01 -7.2731985E+01 -7.2604590E+01 -7.2477455E+01
 -7.2350580E+01 -7.2223964E+01 -7.2097606E+01 -7.1971506E+01
 -7.1845664E+01 -7.1720078E+01 -7.1594748E+01 -7.1469673E+01
 -7.1344854E+01 -7.1220288E+01 -7.1095977E+01 -7.0971918E+01
 -7.0848112E+01 -7.0724557E+01 -7.0601254E+01 -7.0478202E+01
 -7.0355400E+01 -7.0232847E+01 -7.0110544E+01 -6.9988489E+01
 -6.9866681E+01 -6.9745121E+01 -6.9623808E+01 -6.9502740E+01
 -6.9381919E+01 -6.9261342E+01 -6.9141010E+01 -6.9020921E+01
 -6.8901076E+01 -6.8781473E+01 -6.8662113E+01 -6.8542994E+01
 -6.8424116E+01 -6.8305479E+01 -6.8187081E+01 -6.8068923E+01
 -6.7951004E+01 -6.7833323E+01 -6.7715879E+01 -6.7598673E+01
 -6.7481704E+01 -6.7364970E+01 -6.7248472E+01 -6.7132209E+01
 -6.7016181E+01 -6.6900386E+01 -6.6784825E+01 -6.6669496E+01
 -6.6554400E+01 -6.6439535E+01 -6.6324902E+01 -6.6210500E+01
 -6.6096327E+01 -6.5982384E+01 -6.5868671E+01 -6.5755186E+01
 -6.5641929E+01 -6.5528899E+01 -6.5416096E+01 -6.5303520E+01
 -6.5191170E+01 -6.5079046E+01 -6.4967146E+01 -6.4855471E+01
 -6.4744019E+01 -6.4632791E+01 -6.4521786E+01 -6.4411003E+01
 -6.4300442E+01 -6.4190102E+01 -6.4079984E+01 -6.3970085E+01
 -6.3860406E+01 -6.3750947E+01 -6.3641707E+01 -6.3532684E+01
 -6.3423880E+01 -6.3315293E+01 -6.3206923E+01 -6.3098769E+01
 -6.2990831E+01 -6.2883108E+01 -6.2775601E+01 -6.2668307E+01
 -6.2561228E+01 -6.2454362E+01 -6.2347708E+01 -6.2241268E+01
 -6.2135039E+01 -6.2029021E+01 -6.1923215E+01 -6.1817619E+01
 -6.1712233E+01 -6.1607057E+01 -6.1502090E+01 -6.1397331E+01
 -6.1292780E+01 -6.1188437E+01 -6.1084302E+01 -6.0980373E+01
 -6.0876650E+01 -6.0773133E+01 -6.0669821E+01 -6.0566714E+01
 -6.0463812E+01 -6.0361113E+01 -6.0258618E+01 -6.0156326E+01
 -6.0054236E+01 -5.9952349E+01 -5.9850663E+01 -5.9749178E+01
 -5.9647894E+01 -5.9546810E+01 -5.9445926E+01 -5.9345241E+01
 -5.9244756E+01 -5.9144468E+01 -5.9044379E+01 -5.8944487E+01
 -5.8844792E+01 -5.8745294E+01 -5.8645993E+01 -5.8546887E+01
 -5.8447976E+01 -5.8349260E+01 -5.8250739E+01 -5.8152412E+01
 -5.8054278E+01 -5.7956337E+01 -5.7858589E+01 -5.7761034E+01
 -5.7663670E+01 -5.7566498E+01 -5.7469517E+01 -5.7372726E+01
 -5.7276125E+01 -5.7179714E+01 -5.7083493E+01 -5.6987460E+01
 -5.6891616E+01 -5.6795959E+01 -5.6700491E+01 -5.6605209E+01
 -5.6510114E+01 -5.6415206E+01 -5.6320483E+01 -5.6225946E+01
 -5.6131594E+01 -5.6037427E+01 -5.5943444E+01 -5.5849644E+01
 -5.5756028E+01 -5.5662596E+01 -5.5569346E+01 -5.5476278E+01
 -5.5383391E+01 -5.5290687E+01 -5.5198163E+01 -5.5105820E+01
 -5.5013657E+01 -5.4921673E+01 -5.4829869E+01 -5.4738245E+01
 -5.4646798E+01 -5.4555530E+01 -5.4464440E+01 -5.4373527E+01
 -5.4282791E+01 -5.4192232E+01 -5.4101848E+01 -5.4011641E+01
 -5.3921609E+01 -5.3831752E+01 -5.3742070E+01 -5.3652562E+01
 -5.3563228E+01 -5.3474068E+01 -5.3385080E+01 -5.3296265E+01
 -5.3207623E+01 -5.3119153E+01 -5.3030854E+01 -5.2942726E+01
 -5.2854769E+01 -5.2766983E+01 -5.2679366E+01 -5.2591920E+01
 -5.2504642E+01 -5.2417534E+01 -5.2330594E+01 -5.2243822E+01
 -5.2157218E+01 -5.2070782E+01 -5.1984512E+01 -5.1898410E+01
 -5.1812473E+01 -5.1726703E+01 -5.1641098E+01 -5.1555658E+01
 -5.1470384E+01 -5.1385274E+01 -5.1300328E+01 -5.1215545E+01
 -5.1130927E+01 -5.1046471E+01 -5.0962178E+01 -5.0878047E+01
 -5.0794078E+01 -5.0710271E+01 -5.0626626E+01 -5.0543141E+01
 -5.0459816E+01 -5.0376652E+01 -5.0293648E+01 -5.0210803E+01
 -5.0128118E+01 -5.0045591E+01 -4.9963223E+01 -4.9881013E+01
 -4.9798960E+01 -4.9717065E+01 -4.9635328E+01 -4.9553746E+01
 -4.9472322E+01 -4.9391053E+01 -4.9309940E+01 -4.9228982E+01
 -4.9148180E+01 -4.9067532E+01 -4.8987038E+01 -4.8906699E+01
 -4.8826513E+01 -4.8746481E+01 -4.8666601E+01 -4.8586874E+01
 -4.8507300E+01 -4.8427877E+01 -4.8348606E+01 -4.8269487E+01
 -4.8190518E+01 -4.8111701E+01 -4.8033033E+01 -4.7954516E+01
 -4.7876148E+01 -4.7797930E+01 -4.7719860E+01 -4.7641940E+01
 -4.7564168E+01 -4.7486544E+01 -4.7409067E+01 -4.7331738E+01
 -4.7254557E+01 -4.7177522E+01 -4.7100633E+01 -4.7023891E+01
 -4.6947294E+01 -4.6870843E+01 -4.6794537E+01 -4.6718377E+01
 -4.6642360E+01 -4.6566488E+01 -4.6490760E+01 -4.6415176E+01
 -4.6339734E+01 -4.6264436E+01 -4.6189281E+01 -4.6114268E+01
 -4.6039397E+01 -4.5964668E+01 -4.5890080E+01 -4.5815634E+01
 -4.5741328E+01 -4.5667163E+01 -4.5593138E+01 -4.5519253E+01
 -4.5445508E+01 -4.5371902E+01 -4.5298435E+01 -4.5225107E+01
 -4.5151917E+01 -4.5078866E+01 -4.5005952E+01 -4.4933176E+01
 -4.4860537E+01 -4.4788036E+01 -4.4715670E+01 -4.4643442E+01
 -4.4571349E+01 -4.4499392E+01 -4.4427570E+01 -4.4355884E+01
 -4.4284333E+01 -4.4212916E+01 -4.4141634E+01 -4.4070485E+01
 -4.3999471E+01 -4.3928590E+01 -4.3857842E+01 -4.3787227E+01
 -4.3716744E+01 -4.3646394E+01 -4.3576176E+01 -4.3506090E+01
 -4.3436135E+01 -4.3366311E+01 -4.3296618E+01 -4.3227056E+01
 -4.3157625E+01 -4.3088323E+01 -4.3019151E+01 -4.2950109E+01
 -4.2881196E+01 -4.2812411E+01 -4.2743756E+01 -4.2675229E+01
 -4.2606830E+01 -4.2538559E+01 -4.2470415E+01 -4.2402399E+01
 -4.2334510E+01 -4.2266748E+01 -4.2199112E+01 -4.2131603E+01
 -4.2064219E+01 -4.1996961E+01 -4.1929829E+01 -4.1862821E+01
 -4.1795939E+01 -4.1729181E+01 -4.1662548E+01 -4.1596038E+01
 -4.1529653E+01 -4.1463391E+01 -4.1397252E+01 -4.1331237E+01
 -4.1265344E+01 -4.1199574E+01 -4.1133926E+01 -4.1068400E+01
 -4.1002996E+01 -4.0937713E+01 -4.0872552E+01 -4.0807511E+01
 -4.0742591E+01 -4.0677792E+01 -4.0613113E+01 -4.0548554E+01
 -4.0484114E+01 -4.0419794E+01 -4.0355593E+01 -4.0291511E+01
 -4.0227548E+01 -4.0163703E+01 -4.0099977E+01 -4.0036368E+01
 -3.9972877E+01 -3.9909504E+01 -3.9846247E+01 -3.9783108E+01
 -3.9720085E+01 -3.9657179E+01 -3.9594389E+01 -3.9531714E+01
 -3.9469156E+01 -3.9406713E+01 -3.9344385E+01 -3.9282173E+01
 -3.9220075E+01 -3.9158091E+01 -3.9096222E+01 -3.9034467E+01
 -3.8972825E+01 -3.8911297E+01 -3.8849883E+01 -3.8788581E+01
 -3.8727392E+01 -3.8666316E+01 -3.8605352E+01 -3.8544501E+01
 -3.8483761E+01 -3.8423132E+01 -3.8362616E+01 -3.8302210E+01
 -3.8241915E+01 -3.8181731E+01 -3.8121658E+01 -3.8061695E+01
 -3.8001841E+01 -3.7942098E+01 -3.7882464E+01 -3.7822939E+01
 -3.7763524E+01 -3.7704217E+01 -3.7645019E+01 -3.7585929E+01
 -3.7526948E+01 -3.7468075E+01 -3.7409309E+01 -3.7350651E+01
 -3.7292100E+01 -3.7233656E+01 -3.7175319E+01 -3.7117088E+01
 -3.7058964E+01 -3.7000946E+01 -3.6943034E+01 -3.6885228E+01
 -3.6827527E+01 -3.6769932E+01 -3.6712441E+01 -3.6655055E+01
 -3.6597775E+01 -3.6540598E+01 -3.6483526E+01 -3.6426557E+01
 -3.6369692E+01 -3.6312931E+01 -3.6256274E+01 -3.6199719E+01
 -3.6143267E+01 -3.6086918E+01 -3.6030671E+01 -3.5974527E+01
 -3.5918485E+01 -3.5862544E+01 -3.5806705E+01 -3.5750968E+01
 -3.5695331E+01 -3.5639796E+01 -3.5584362E+01 -3.5529028E+01
 -3.5473794E+01 -3.5418660E+01 -3.5363627E+01 -3.5308693E+01
 -3.5253859E+01 -3.5199124E+01 -3.5144488E+01 -3.5089951E+01
 -3.5035513E+01 -3.4981173E+01 -3.4926932E+01 -3.4872789E+01
 -3.4818743E+01 -3.4764796E+01 -3.4710946E+01 -3.4657193E+01
 -3.4603537E+01 -3.4549978E+01 -3.4496516E+01 -3.4443150E+01
 -3.4389880E+01 -3.4336707E+01 -3.4283630E+01 -3.4230648E+01
 -3.4177762E+01 -3.4124971E+01 -3.4072275E+01 -3.4019674E+01
 -3.3967168E+01 -3.3914756E+01 -3.3862438E+01 -3.3810215E+01
 -3.3758086E+01 -3.3706050E+01 -3.3654108E+01 -3.3602260E+01
 -3.3550504E+01 -3.3498842E+01 -3.3447272E+01 -3.3395795E+01
 -3.3344410E+01 -3.3293117E+01 -3.3241917E+01 -3.3190808E+01
 -3.3139791E+01 -3.3088866E+01 -3.3038032E+01 -3.2987288E+01
 -3.2936636E+01 -3.2886075E+01 -3.2835604E+01 -3.2785223E+01
 -3.2734932E+01 -3.2684732E+01 -3.2634621E+01 -3.2584600E+01
 -3.2534668E+01 -3.2484826E+01 -3.2435073E+01 -3.2385408E+01
 -3.2335832E+01 -3.2286345E+01 -3.2236946E+01 -3.2187635E+01
 -3.2138412E+01 -3.2089277E+01 -3.2040230E+01 -3.1991270E+01
 -3.1942397E+01 -3.1893612E+01 -3.1844913E+01 -3.1796301E+01
 -3.1747775E+01 -3.1699336E+01 -3.1650983E+01 -3.1602717E+01
 -3.1554536E+01 -3.1506440E+01 -3.1458431E+01 -3.1410506E+01
 -3.1362667E+01 -3.1314912E+01 -3.1267243E+01 -3.1219658E+01
 -3.1172158E+01 -3.1124741E+01 -3.1077409E+01 -3.1030161E+01
 -3.0982997E+01 -3.0935916E+01 -3.0888919E+01 -3.0842005E+01
 -3.0795175E+01 -3.0748427E+01 -3.0701762E+01 -3.0655179E+01
 -3.0608679E+01 -3.0562261E+01 -3.0515925E+01 -3.0469672E+01
 -3.0423500E+01 -3.0377409E+01 -3.0331400E+01 -3.0285473E+01
 -3.0239626E+01 -3.0193861E+01 -3.0148176E+01 -3.0102572E+01
 -3.0057048E+01 -3.0011604E+01 -2.9966241E+01 -2.9920958E+01
 -2.9875754E+01 -2.9830630E+01 -2.9785586E+01 -2.9740621E+01
 -2.9695735E+01 -2.9650928E+01 -2.9606200E+01 -2.9561551E+01
 -2.9516980E+01 -2.9472488E+01 -2.9428074E+01 -2.9383738E+01
 -2.9339480E+01 -2.9295299E+01 -2.9251196E+01 -2.9207171E+01
 -2.9163223E+01 -2.9119352E+01 -2.9075558E+01 -2.9031841E+01
 -2.8988200E+01 -2.8944636E+01 -2.8901149E+01 -2.8857737E+01
 -2.8814402E+01 -2.8771143E+01 -2.8727959E+01 -2.8684851E+01
 -2.8641818E+01 -2.8598861E+01 -2.8555979E+01 -2.8513171E+01
 -2.8470439E+01 -2.8427781E+01 -2.8385198E+01 -2.8342690E+01
 -2.8300255E+01 -2.8257895E+01 -2.8215608E+01 -2.8173396E+01
 -2.8131257E+01 -2.8089191E+01 -2.8047199E+01 -2.8005280E+01
 -2.7963435E+01 -2.7921662E+01 -2.7879962E+01 -2.7838334E+01
 -2.7796779E+01 -2.7755297E+01 -2.7713887E+01 -2.7672548E+01
 -2.7631282E+01 -2.7590087E+01 -2.7548964E+01 -2.7507913E+01
 -2.7466933E+01 -2.7426024E+01 -2.7385186E+01 -2.7344419E+01
 -2.7303723E+01 -2.7263097E+01 -2.7222542E+01 -2.7182058E+01
 -2.7141643E+01 -2.7101299E+01 -2.7061025E+01 -2.7020820E+01
 -2.6980685E+01 -2.6940620E+01 -2.6900624E+01 -2.6860697E+01
 -2.6820840E+01 -2.6781051E+01 -2.6741331E+01 -2.6701680E+01
 -2.6662098E+01 -2.6622584E+01 -2.6583138E+01 -2.6543760E+01
 -2.6504451E+01 -2.6465209E+01 -2.6426035E+01 -2.6386929E+01
 -2.6347890E+01 -2.6308919E+01 -2.6270015E+01 -2.6231178E+01
 -2.6192408E+01 -2.6153705E+01 -2.6115068E+01 -2.6076498E+01
 -2.6037995E+01 -2.5999558E+01 -2.5961187E+01 -2.5922882E+01
 -2.5884643E+01 -2.5846469E+01 -2.5808362E+01 -2.5770320E+01
 -2.5732343E+01 -2.5694432E+01 -2.5656585E+01 -2.5618804E+01
 -2.5581088E+01 -2.5543436E+01 -2.5505850E+01 -2.5468327E+01
 -2.5430869E+01 -2.5393475E+01 -2.5356146E+01 -2.5318880E+01
 -2.5281678E+01 -2.5244540E+01 -2.5207466E+01 -2.5170455E+01
 -2.5133508E+01 -2.5096624E+01 -2.5059803E+01 -2.5023045E+01
 -2.4986349E+01 -2.4949717E+01 -2.4913147E+01 -2.4876640E+01
 -2.4840195E+01 -2.4803813E+01 -2.4767492E+01 -2.4731234E+01
 -2.4695037E+01 -2.4658903E+01 -2.4622830E+01 -2.4586818E+01
 -2.4550868E+01 -2.4514980E+01 -2.4479152E+01 -2.4443386E+01
 -2.4407680E+01 -2.4372035E+01 -2.4336452E+01 -2.4300928E+01
 -2.4265465E+01 -2.4230063E+01 -2.4194721E+01 -2.4159438E+01
 -2.4124216E+01 -2.4089054E+01 -2.4053952E+01 -2.4018909E+01
 -2.3983926E+01 -2.3949002E+01 -2.3914137E+01 -2.3879332E+01
 -2.3844586E+01 -2.3809899E+01 -2.3775270E+01 -2.3740701E+01
 -2.3706190E+01 -2.3671737E+01 -2.3637343E+01 -2.3603007E+01
 -2.3568730E+01 -2.3534510E+01 -2.3500348E+01 -2.3466245E+01
 -2.3432199E+01 -2.3398210E+01 -2.3364279E+01 -2.3330406E+01
 -2.3296589E+01 -2.3262830E+01 -2.3229128E+01 -2.3195483E+01
 -2.3161895E+01 -2.3128364E+01 -2.3094889E+01 -2.3061470E+01
 -2.3028108E+01 -2.2994803E+01 -2.2961553E+01 -2.2928360E+01
 -2.2895222E+01 -2.2862141E+01 -2.2829115E+01 -2.2796145E+01
 -2.2763230E+01 -2.2730371E+01 -2.2697567E+01 -2.2664818E+01
 -2.2632125E+01 -2.2599486E+01 -2.2566902E+01 -2.2534373E+01
 -2.2501899E+01 -2.2469480E+01 -2.2437115E+01 -2.2404804E+01
 -2.2372547E+01 -2.2340345E+01 -2.2308197E+01 -2.2276103E+01
 -2.2244062E+01 -2.2212076E+01 -2.2180143E+01 -2.2148263E+01
 -2.2116437E+01 -2.2084664E+01 -2.2052945E+01 -2.2021279E+01
 -2.1989665E+01 -2.1958105E+01 -2.1926598E+01 -2.1895143E+01
 -2.1863741E+01 -2.1832391E+01 -2.1801094E+01 -2.1769849E+01
 -2.1738656E+01 -2.1707516E+01 -2.1676427E+01 -2.1645391E+01
 -2.1614406E+01 -2.1583473E+01 -2.1552592E+01 -2.1521762E+01
 -2.1490984E+01 -2.1460257E+01 -2.1429581E+01 -2.1398956E+01
 -2.1368383E+01 -2.1337860E+01 -2.1307388E+01 -2.1276967E+01
 -2.1246597E+01 -2.1216277E+01 -2.1186008E+01 -2.1155789E+01
 -2.1125620E+01 -2.1095502E+01 -2.1065433E+01 -2.1035415E+01
 -2.1005447E+01 -2.0975528E+01 -2.0945659E+01 -2.0915839E+01
 -2.0886069E+01 -2.0856349E+01 -2.0826678E+01 -2.0797056E+01
 -2.0767483E+01 -2.0737959E+01 -2.0708485E+01 -2.0679059E+01
 -2.0649682E+01 -2.0620353E+01 -2.0591073E+01 -2.0561842E+01
 -2.0532659E+01 -2.0503524E+01 -2.0474438E+01 -2.0445399E+01
 -2.0416409E+01 -2.0387467E+01 -2.0358572E+01 -2.0329726E+01
 -2.0300927E+01 -2.0272175E+01 -2.0243471E+01 -2.0214815E+01
 -2.0186205E+01 -2.0157643E+01 -2.0129129E+01 -2.0100661E+01
 -2.0072240E+01 -2.0043866E+01 -2.0015539E+01 -1.9987258E+01
 -1.9959024E+01 -1.9930837E+01 -1.9902696E+01 -1.9874601E+01
 -1.9846553E+01 -1.9818551E+01 -1.9790595E+01 -1.9762684E+01
 -1.9734820E+01 -1.9707002E+01 -1.9679229E+01 -1.9651502E+01
 -1.9623821E+01 -1.9596185E+01 -1.9568594E+01 -1.9541049E+01
 -1.9513549E+01 -1.9486094E+01 -1.9458684E+01 -1.9431320E+01
 -1.9404000E+01 -1.9376725E+01 -1.9349494E+01 -1.9322308E+01
 -1.9295167E+01 -1.9268070E+01 -1.9241018E+01 -1.9214010E+01
 -1.9187046E+01 -1.9160126E+01 -1.9133251E+01 -1.9106419E+01
 -1.9079631E+01 -1.9052887E+01 -1.9026187E+01 -1.8999530E+01
 -1.8972917E+01 -1.8946347E+01 -1.8919821E+01 -1.8893338E+01
 -1.8866899E+01 -1.8840502E+01 -1.8814149E+01 -1.8787838E+01
 -1.8761571E+01 -1.8735346E+01 -1.8709164E+01 -1.8683025E+01
 -1.8656928E+01 -1.8630874E+01 -1.8604862E+01 -1.8578893E+01
 -1.8552966E+01 -1.8527081E+01 -1.8501238E+01 -1.8475438E+01
 -1.8449679E+01 -1.8423962E+01 -1.8398287E+01 -1.8372654E+01
 -1.8347062E+01 -1.8321512E+01 -1.8296004E+01 -1.8270537E+01
 -1.8245111E+01 -1.8219726E+01 -1.8194383E+01 -1.8169081E+01
 -1.8143820E+01 -1.8118600E+01 -1.8093420E+01 -1.8068282E+01
 -1.8043184E+01 -1.8018127E+01 -1.7993111E+01 -1.7968135E+01
 -1.7943199E+01 -1.7918304E+01 -1.7893449E+01 -1.7868634E+01
 -1.7843860E+01 -1.7819125E+01 -1.7794431E+01 -1.7769776E+01
 -1.7745162E+01 -1.7720587E+01 -1.7696051E+01 -1.7671556E+01
 -1.7647100E+01 -1.7622683E+01 -1.7598306E+01 -1.7573968E+01
 -1.7549669E+01 -1.7525410E+01 -1.7501190E+01 -1.7477008E+01
 -1.7452866E+01 -1.7428763E+01 -1.7404698E+01 -1.7380672E+01
 -1.7356685E+01 -1.7332737E+01 -1.7308827E+01 -1.7284955E+01
 -1.7261122E+01 -1.7237327E+01 -1.7213571E+01 -1.7189853E+01
 -1.7166172E+01 -1.7142530E+01 -1.7118926E+01 -1.7095360E+01
 -1.7071831E+01 -1.7048341E+01 -1.7024888E+01 -1.7001472E+01
 -1.6978095E+01 -1.6954754E+01 -1.6931452E+01 -1.6908186E+01
 -1.6884958E+01 -1.6861767E+01 -1.6838613E+01 -1.6815496E+01
 -1.6792417E+01 -1.6769374E+01 -1.6746368E+01 -1.6723399E+01
 -1.6700467E+01 -1.6677571E+01 -1.6654712E+01 -1.6631890E+01
 -1.6609104E+01 -1.6586354E+01 -1.6563641E+01 -1.6540964E+01
 -1.6518323E+01 -1.6495718E+01 -1.6473150E+01 -1.6450617E+01
 -1.6428121E+01 -1.6405660E+01 -1.6383235E+01 -1.6360846E+01
 -1.6338493E+01 -1.6316175E+01 -1.6293893E+01 -1.6271646E+01
 -1.6249435E+01 -1.6227259E+01 -1.6205118E+01 -1.6183012E+01
 -1.6160942E+01 -1.6138907E+01 -1.6116907E+01 -1.6094942E+01
 -1.6073012E+01 -1.6051116E+01 -1.6029256E+01 -1.6007430E+01
 -1.5985639E+01 -1.5963882E+01 -1.5942160E+01 -1.5920473E+01
 -1.5898820E+01 -1.5877201E+01 -1.5855616E+01 -1.5834066E+01
 -1.5812550E+01 -1.5791068E+01 -1.5769620E+01 -1.5748206E+01
 -1.5726826E+01 -1.5705480E+01 -1.5684167E+01 -1.5662888E+01
 -1.5641643E+01 -1.5620432E+01 -1.5599254E+01 -1.5578110E+01
 -1.5556999E+01 -1.5535921E+01 -1.5514877E+01 -1.5493866E+01
 -1.5472888E+01 -1.5451944E+01 -1.5431032E+01 -1.5410153E+01
 -1.5389308E+01 -1.5368495E+01 -1.5347715E+01 -1.5326968E+01
 -1.5306253E+01 -1.5285572E+01 -1.5264922E+01 -1.5244306E+01
 -1.5223722E+01 -1.5203170E+01 -1.5182650E+01 -1.5162163E+01
 -1.5141708E+01 -1.5121286E+01 -1.5100895E+01 -1.5080537E+01
 -1.5060210E+01 -1.5039916E+01 -1.5019653E+01 -1.4999422E+01
 -1.4979224E+01 -1.4959056E+01 -1.4938921E+01 -1.4918817E+01
 -1.4898744E+01 -1.4878703E+01 -1.4858694E+01 -1.4838716E+01
 -1.4818769E+01 -1.4798854E+01 -1.4778969E+01 -1.4759116E+01
 -1.4739294E+01 -1.4719503E+01 -1.4699744E+01 -1.4680015E+01
 -1.4660316E+01 -1.4640649E+01 -1.4621013E+01 -1.4601407E+01
 -1.4581832E+01 -1.4562287E+01 -1.4542773E+01 -1.4523290E+01
 -1.4503837E+01 -1.4484414E+01 -1.4465022E+01 -1.4445660E+01
 -1.4426328E+01 -1.4407027E+01 -1.4387755E+01 -1.4368514E+01
 -1.4349302E+01 -1.4330121E+01 -1.4310969E+01 -1.4291848E+01
 -1.4272756E+01 -1.4253694E+01 -1.4234661E+01 -1.4215659E+01
 -1.4196685E+01 -1.4177742E+01 -1.4158828E+01 -1.4139943E+01
 -1.4121088E+01 -1.4102262E+01 -1.4083465E+01 -1.4064697E+01
 -1.4045959E+01 -1.4027250E+01 -1.4008570E+01 -1.3989918E+01
 -1.3971296E+01 -1.3952703E+01 -1.3934139E+01 -1.3915603E+01
 -1.3897096E+01 -1.3878618E+01 -1.3860168E+01 -1.3841748E+01
 -1.3823355E+01 -1.3804992E+01 -1.3786656E+01 -1.3768349E+01
 -1.3750071E+01 -1.3731820E+01 -1.3713598E+01 -1.3695404E+01
 -1.3677239E+01 -1.3659101E+01 -1.3640992E+01 -1.3622910E+01
 -1.3604857E+01 -1.3586831E+01 -1.3568833E+01 -1.3550863E+01
 -1.3532921E+01 -1.3515007E+01 -1.3497120E+01 -1.3479260E+01
 -1.3461429E+01 -1.3443625E+01 -1.3425848E+01 -1.3408099E+01
 -1.3390377E+01 -1.3372682E+01 -1.3355015E+01 -1.3337375E+01
 -1.3319762E+01 -1.3302176E+01 -1.3284617E+01 -1.3267086E+01
 -1.3249581E+01 -1.3232103E+01 -1.3214652E+01 -1.3197228E+01
 -1.3179831E+01 -1.3162461E+01 -1.3145117E+01 -1.3127800E+01
 -1.3110510E+01 -1.3093246E+01 -1.3076008E+01 -1.3058797E+01
 -1.3041613E+01 -1.3024455E+01 -1.3007323E+01 -1.2990217E+01
 -1.2973138E+01 -1.2956085E+01 -1.2939058E+01 -1.2922057E+01
 -1.2905082E+01 -1.2888134E+01 -1.2871211E+01 -1.2854314E+01
 -1.2837443E+01 -1.2820598E+01 -1.2803778E+01 -1.2786985E+01
 -1.2770217E+01 -1.2753474E+01 -1.2736758E+01 -1.2720066E+01
 -1.2703401E+01 -1.2686761E+01 -1.2670146E+01 -1.2653556E+01
 -1.2636992E+01 -1.2620454E+01 -1.2603940E+01 -1.2587452E+01
 -1.2570989E+01 -1.2554551E+01 -1.2538138E+01 -1.2521750E+01
 -1.2505387E+01 -1.2489049E+01 -1.2472736E+01 -1.2456447E+01
 -1.2440184E+01 -1.2423945E+01 -1.2407731E+01 -1.2391542E+01
 -1.2375377E+01 -1.2359237E+01 -1.2343122E+01 -1.2327031E+01
 -1.2310964E+01 -1.2294922E+01 -1.2278905E+01 -1.2262911E+01
 -1.2246942E+01 -1.2230997E+01 -1.2215077E+01 -1.2199180E+01
 -1.2183308E+01 -1.2167460E+01 -1.2151636E+01 -1.2135835E+01
 -1.2120059E+01 -1.2104307E+01 -1.2088579E+01 -1.2072874E+01
 -1.2057193E+01 -1.2041536E+01 -1.2025903E+01 -1.2010293E+01
 -1.1994707E+01 -1.1979145E+01 -1.1963606E+01 -1.1948091E+01
 -1.1932599E+01 -1.1917131E+01 -1.1901686E+01 -1.1886264E+01
 -1.1870866E+01 -1.1855490E+01 -1.1840139E+01 -1.1824810E+01
 -1.1809504E+01 -1.1794222E+01 -1.1778963E+01 -1.1763726E+01
 -1.1748513E+01 -1.1733322E+01 -1.1718155E+01 -1.1703010E+01
 -1.1687889E+01 -1.1672790E+01 -1.1657713E+01 -1.1642660E+01
 -1.1627629E+01 -1.1612621E+01 -1.1597635E+01 -1.1582672E+01
 -1.1567731E+01 -1.1552813E+01 -1.1537918E+01 -1.1523044E+01
 -1.1508194E+01 -1.1493365E+01 -1.1478559E+01 -1.1463775E+01
 -1.1449013E+01 -1.1434273E+01 -1.1419556E+01 -1.1404860E+01
 -1.1390187E+01 -1.1375536E+01 -1.1360906E+01 -1.1346299E+01
 -1.1331713E+01 -1.1317150E+01 -1.1302608E+01 -1.1288088E+01
 -1.1273590E+01 -1.1259113E+01 -1.1244658E+01 -1.1230225E+01
 -1.1215814E+01 -1.1201424E+01 -1.1187055E+01 -1.1172708E+01
 -1.1158383E+01 -1.1144079E+01 -1.1129796E+01 -1.1115535E+01
 -1.1101295E+01 -1.1087076E+01 -1.1072878E+01 -1.1058702E+01
 -1.1044547E+01 -1.1030413E+01 -1.1016300E+01 -1.1002208E+01
 -1.0988137E+01 -1.0974087E+01 -1.0960059E+01 -1.0946051E+01
 -1.0932064E+01 -1.0918097E+01 -1.0904152E+01 -1.0890227E+01
 -1.0876323E+01 -1.0862440E+01 -1.0848578E+01 -1.0834736E+01
 -1.0820914E+01 -1.0807114E+01 -1.0793334E+01 -1.0779574E+01
 -1.0765835E+01 -1.0752116E+01 -1.0738417E+01 -1.0724739E+01
 -1.0711082E+01 -1.0697444E+01 -1.0683827E+01 -1.0670230E+01
 -1.0656653E+01 -1.0643097E+01 -1.0629560E+01 -1.0616044E+01
 -1.0602547E+01 -1.0589071E+01 -1.0575614E+01 -1.0562178E+01
 -1.0548761E+01 -1.0535365E+01 -1.0521988E+01 -1.0508631E+01
 -1.0495294E+01 -1.0481976E+01 -1.0468678E+01 -1.0455400E+01
 -1.0442142E+01 -1.0428903E+01 -1.0415684E+01 -1.0402484E+01
 -1.0389304E+01 -1.0376143E+01 -1.0363002E+01 -1.0349880E+01
 -1.0336777E+01 -1.0323694E+01 -1.0310630E+01 -1.0297586E+01
 -1.0284561E+01 -1.0271554E+01 -1.0258568E+01 -1.0245600E+01
 -1.0232651E+01 -1.0219722E+01 -1.0206811E+01 -1.0193920E+01
 -1.0181047E+01 -1.0168194E+01 -1.0155359E+01 -1.0142544E+01
 -1.0129747E+01 -1.0116969E+01 -1.0104210E+01 -1.0091469E+01
 -1.0078747E+01 -1.0066044E+01 -1.0053360E+01 -1.0040695E+01
 -1.0028048E+01 -1.0015419E+01 -1.0002809E+01 -9.9902178E+00
 -9.9776449E+00 -9.9650904E+00 -9.9525544E+00 -9.9400368E+00
 -9.9275375E+00 -9.9150566E+00 -9.9025940E+00 -9.8901496E+00
 -9.8777235E+00 -9.8653156E+00 -9.8529259E+00 -9.8405543E+00
 -9.8282009E+00 -9.8158655E+00 -9.8035482E+00 -9.7912489E+00
 -9.7789677E+00 -9.7667044E+00 -9.7544590E+00 -9.7422315E+00
 -9.7300219E+00 -9.7178302E+00 -9.7056563E+00 -9.6935002E+00
 -9.6813618E+00 -9.6692411E+00 -9.6571382E+00 -9.6450529E+00
 -9.6329853E+00 -9.6209353E+00 -9.6089029E+00 -9.5968880E+00
 -9.5848906E+00 -9.5729108E+00 -9.5609484E+00 -9.5490034E+00
 -9.5370758E+00 -9.5251657E+00 -9.5132728E+00 -9.5013973E+00
 -9.4895391E+00 -9.4776982E+00 -9.4658744E+00 -9.4540679E+00
 -9.4422786E+00 -9.4305064E+00 -9.4187513E+00 -9.4070133E+00
 -9.3952924E+00 -9.3835885E+00 -9.3719017E+00 -9.3602318E+00
 -9.3485788E+00 -9.3369428E+00 -9.3253237E+00 -9.3137214E+00
 -9.3021360E+00 -9.2905673E+00 -9.2790155E+00 -9.2674804E+00
 -9.2559621E+00 -9.2444604E+00 -9.2329754E+00 -9.2215071E+00
 -9.2100553E+00 -9.1986202E+00 -9.1872016E+00 -9.1757996E+00
 -9.1644140E+00 -9.1530450E+00 -9.1416923E+00 -9.1303562E+00
 -9.1190364E+00 -9.1077329E+00 -9.0964459E+00 -9.0851751E+00
 -9.0739206E+00 -9.0626824E+00 -9.0514604E+00 -9.0402547E+00
 -9.0290651E+00 -9.0178917E+00 -9.0067344E+00 -8.9955932E+00
 -8.9844680E+00 -8.9733589E+00 -8.9622659E+00 -8.9511888E+00
 -8.9401277E+00 -8.9290826E+00 -8.9180534E+00 -8.9070400E+00
 -8.8960425E+00 -8.8850609E+00 -8.8740951E+00 -8.8631450E+00
 -8.8522108E+00 -8.8412922E+00 -8.8303894E+00 -8.8195022E+00
 -8.8086307E+00 -8.7977749E+00 -8.7869346E+00 -8.7761099E+00
 -8.7653008E+00 -8.7545072E+00 -8.7437291E+00 -8.7329665E+00
 -8.7222193E+00 -8.7114876E+00 -8.7007713E+00 -8.6900703E+00
 -8.6793847E+00 -8.6687144E+00 -8.6580594E+00 -8.6474197E+00
 -8.6367953E+00 -8.6261861E+00 -8.6155920E+00 -8.6050132E+00
 -8.5944495E+00 -8.5839009E+00 -8.5733675E+00 -8.5628491E+00
 -8.5523457E+00 -8.5418574E+00 -8.5313841E+00 -8.5209258E+00
 -8.5104824E+00 -8.5000539E+00 -8.4896404E+00 -8.4792417E+00
 -8.4688579E+00 -8.4584890E+00 -8.4481348E+00 -8.4377954E+00
 -8.4274708E+00 -8.4171609E+00 -8.4068658E+00 -8.3965853E+00
 -8.3863195E+00 -8.3760683E+00 -8.3658317E+00 -8.3556097E+00
 -8.3454023E+00 -8.3352095E+00 -8.3250312E+00 -8.3148673E+00
 -8.3047180E+00 -8.2945830E+00 -8.2844626E+00 -8.2743565E+00
 -8.2642648E+00 -8.2541874E+00 -8.2441244E+00 -8.2340757E+00
 -8.2240413E+00 -8.2140211E+00 -8.2040152E+00 -8.1940235E+00
 -8.1840460E+00 -8.1740827E+00 -8.1641335E+00 -8.1541985E+00
 -8.1442775E+00 -8.1343706E+00 -8.1244778E+00 -8.1145990E+00
 -8.1047343E+00 -8.0948835E+00 -8.0850466E+00 -8.0752238E+00
 -8.0654148E+00 -8.0556198E+00 -8.0458386E+00 -8.0360712E+00
 -8.0263177E+00 -8.0165781E+00 -8.0068522E+00 -7.9971400E+00
 -7.9874416E+00 -7.9777569E+00 -7.9680859E+00 -7.9584286E+00
 -7.9487850E+00 -7.9391550E+00 -7.9295385E+00 -7.9199357E+00
 -7.9103464E+00 -7.9007707E+00 -7.8912085E+00 -7.8816598E+00
 -7.8721246E+00 -7.8626028E+00 -7.8530945E+00 -7.8435996E+00
 -7.8341180E+00 -7.8246499E+00 -7.8151950E+00 -7.8057535E+00
 -7.7963254E+00 -7.7869105E+00 -7.7775088E+00 -7.7681204E+00
 -7.7587452E+00 -7.7493832E+00 -7.7400344E+00 -7.7306988E+00
 -7.7213763E+00 -7.7120669E+00 -7.7027706E+00 -7.6934873E+00
 -7.6842171E+00 -7.6749600E+00 -7.6657158E+00 -7.6564846E+00
 -7.6472664E+00 -7.6380612E+00 -7.6288689E+00 -7.6196894E+00
 -7.6105229E+00 -7.6013692E+00 -7.5922284E+00 -7.5831004E+00
 -7.5739851E+00 -7.5648827E+00 -7.5557930E+00 -7.5467161E+00
 -7.5376519E+00 -7.5286004E+00 -7.5195615E+00 -7.5105353E+00
 -7.5015218E+00 -7.4925209E+00 -7.4835325E+00 -7.4745568E+00
 Si4+       O
  9.5140000E+06  9.4702040E+06  9.4266100E+06  9.3832160E+06
  9.3400220E+06  9.2970270E+06  9.2542300E+06  9.2116300E+06
  9.1692260E+06  9.1270170E+06  9.0850030E+06  9.0431820E+06
  9.0015530E+06  8.9601160E+06  8.9188700E+06  8.8778130E+06
  8.8369460E+06  8.7962670E+06  8.7557750E+06  8.7154690E+06
  8.6753490E+06  8.6354140E+06  8.5956620E+06  8.5560940E+06
  8.5167070E+06  8.4775020E+06  8.4384780E+06  8.3996320E+06
  8.3609665E+06  8.3224780E+06  8.2841670E+06  8.2460325E+06
  8.2080735E+06  8.1702890E+06  8.1326785E+06  8.0952415E+06
  8.0579765E+06  8.0208830E+06  7.9839605E+06  7.9472080E+06
  7.9106245E+06  7.8742090E+06  7.8379615E+06  7.8018810E+06
  7.7659665E+06  7.7302175E+06  7.6946330E+06  7.6592120E+06
  7.6239540E+06  7.5888585E+06  7.5539250E+06  7.5191515E+06
  7.4845385E+06  7.4500850E+06  7.4157900E+06  7.3816525E+06
  7.3476725E+06  7.3138490E+06  7.2801810E+06  7.2466680E+06
  7.2133095E+06  7.1801040E+06  7.1470520E+06  7.1141520E+06
  7.0814030E+06  7.0488050E+06  7.0163575E+06  6.9840590E+06
  6.9519090E+06  6.9199070E+06  6.8880525E+06  6.8563450E+06
  6.8247830E+06  6.7933665E+06  6.7620940E+06  6.7309660E+06
  6.6999815E+06  6.6691395E+06  6.6384390E+06  6.6078805E+06
  6.5774620E+06  6.5471840E+06  6.5170455E+06  6.4870455E+06
  6.4571835E+06  6.4274590E+06  6.3978715E+06  6.3684200E+06
  6.3391040E+06  6.3099230E+06  6.2808765E+06  6.2519635E+06
  6.2231840E+06  6.1945365E+06  6.1660215E+06  6.1376370E+06
  6.1093835E+06  6.0812605E+06  6.0532665E+06  6.0254010E+06
  5.9976645E+06  5.9700555E+06  5.9425730E+06  5.9152175E+06
  5.8879880E+06  5.8608840E+06  5.8339045E+06  5.8070490E+06
  5.7803175E+06  5.7537085E+06  5.7272225E+06  5.7008585E+06
  5.6746155E+06  5.6484935E+06  5.6224915E+06  5.5966095E+06
  5.5708465E+06  5.5452025E+06  5.5196760E+06  5.4942670E+06
  5.4689755E+06  5.4438000E+06  5.4187405E+06  5.3937960E+06
  5.3689670E+06  5.3442520E+06  5.3196505E+06  5.2951625E+06
  5.2707870E+06  5.2465240E+06  5.2223725E+06  5.1983325E+06
  5.1744030E+06  5.1505835E+06  5.1268740E+06  5.1032730E+06
  5.0797810E+06  5.0563975E+06  5.0331210E+06  5.0099520E+06
  4.9868895E+06  4.9639335E+06  4.9410830E+06  4.9183375E+06
  4.8956970E+06  4.8731605E+06  4.8507280E+06  4.8283985E+06
  4.8061715E+06  4.7840475E+06  4.7620250E+06  4.7401040E+06
  4.7182835E+06  4.6965640E+06  4.6749440E+06  4.6534240E+06
  4.6320025E+06  4.6106800E+06  4.5894555E+06  4.5683290E+06
  4.5472995E+06  4.5263670E+06  4.5055305E+06  4.4847900E+06
  4.4641455E+06  4.4435955E+06  4.4231400E+06  4.4027790E+06
  4.3825115E+06  4.3623375E+06  4.3422565E+06  4.3222675E+06
  4.3023710E+06  4.2825655E+06  4.2628515E+06  4.2432285E+06
  4.2236955E+06  4.2042525E+06  4.1848990E+06  4.1656345E+06
  4.1464590E+06  4.1273715E+06  4.1083720E+06  4.0894598E+06
  4.0706348E+06  4.0518962E+06  4.0332440E+06  4.0146778E+06
  3.9961970E+06  3.9778012E+06  3.9594900E+06  3.9412635E+06
  3.9231205E+06  3.9050610E+06  3.8870850E+06  3.8691915E+06
  3.8513802E+06  3.8336512E+06  3.8160038E+06  3.7984375E+06
  3.7809520E+06  3.7635470E+06  3.7462222E+06  3.7289772E+06
  3.7118115E+06  3.6947250E+06  3.6777170E+06  3.6607872E+06
  3.6439355E+06  3.6271615E+06  3.6104645E+06  3.5938442E+06
  3.5773008E+06  3.5608332E+06  3.5444415E+06  3.5281255E+06
  3.5118845E+06  3.4957180E+06  3.4796262E+06  3.4636085E+06
  3.4476642E+06  3.4317935E+06  3.4159960E+06  3.4002710E+06
  3.3846185E+06  3.3690380E+06  3.3535292E+06  3.3380920E+06
  3.3227258E+06  3.3074300E+06  3.2922050E+06  3.2770500E+06
  3.2619645E+06  3.2469488E+06  3.2320020E+06  3.2171240E+06
  3.2023148E+06  3.1875735E+06  3.1729000E+06  3.1582942E+06
  3.1437555E+06  3.1292840E+06  3.1148788E+06  3.1005400E+06
  3.0862672E+06  3.0720602E+06  3.0579185E+06  3.0438420E+06
  3.0298302E+06  3.0158830E+06  3.0020000E+06  2.9881808E+06
  2.9744252E+06  2.9607330E+06  2.9471038E+06  2.9335372E+06
  2.9200332E+06  2.9065915E+06  2.8932115E+06  2.8798932E+06
  2.8666360E+06  2.8534400E+06  2.8403048E+06  2.8272300E+06
  2.8142155E+06  2.8012608E+06  2.7883655E+06  2.7755298E+06
  2.7627532E+06  2.7500355E+06  2.7373760E+06  2.7247750E+06
  2.7122320E+06  2.6997468E+06  2.6873190E+06  2.6749485E+06
  2.6626348E+06  2.6503780E+06  2.6381775E+06  2.6260330E+06
  2.6139445E+06  2.6019118E+06  2.5899342E+06  2.5780120E+06
  2.5661445E+06  2.5543320E+06  2.5425735E+06  2.5308692E+06
  2.5192188E+06  2.5076220E+06  2.4960788E+06  2.4845885E+06
  2.4731510E+06  2.4617665E+06  2.4504340E+06  2.4391540E+06
  2.4279258E+06  2.4167492E+06  2.4056242E+06  2.3945505E+06
  2.3835275E+06  2.3725555E+06  2.3616338E+06  2.3507625E+06
  2.3399410E+06  2.3291698E+06  2.3184478E+06  2.3077752E+06
  2.2971518E+06  2.2865772E+06  2.2760515E+06  2.2655740E+06
  2.2551450E+06  2.2447638E+06  2.2344305E+06  2.2241445E+06
  2.2139062E+06  2.2037150E+06  2.1935705E+06  2.1834728E+06
  2.1734215E+06  2.1634165E+06  2.1534578E+06  2.1435448E+06
  2.1336772E+06  2.1238552E+06  2.1140785E+06  2.1043468E+06
  2.0946598E+06  2.0850174E+06  2.0754194E+06  2.0658656E+06
  2.0563558E+06  2.0468898E+06  2.0374672E+06  2.0280881E+06
  2.0187522E+06  2.0094592E+06  2.0002091E+06  1.9910015E+06
  1.9818362E+06  1.9727132E+06  1.9636322E+06  1.9545930E+06
  1.9455954E+06  1.9366392E+06  1.9277242E+06  1.9188504E+06
  1.9100172E+06  1.9012249E+06  1.8924729E+06  1.8837612E+06
  1.8750898E+06  1.8664581E+06  1.8578662E+06  1.8493139E+06
  1.8408009E+06  1.8323271E+06  1.8238922E+06  1.8154964E+06
  1.8071391E+06  1.7988202E+06  1.7905398E+06  1.7822972E+06
  1.7740928E+06  1.7659261E+06  1.7577970E+06  1.7497052E+06
  1.7416509E+06  1.7336335E+06  1.7256530E+06  1.7177092E+06
  1.7098021E+06  1.7019314E+06  1.6940969E+06  1.6862984E+06
  1.6785358E+06  1.6708090E+06  1.6631178E+06  1.6554619E+06
  1.6478412E+06  1.6402558E+06  1.6327051E+06  1.6251892E+06
  1.6177080E+06  1.6102612E+06  1.6028488E+06  1.5954702E+06
  1.5881258E+06  1.5808151E+06  1.5735382E+06  1.5662948E+06
  1.5590845E+06  1.5519076E+06  1.5447636E+06  1.5376526E+06
  1.5305742E+06  1.5235286E+06  1.5165152E+06  1.5095342E+06
  1.5025854E+06  1.4956686E+06  1.4887835E+06  1.4819302E+06
  1.4751084E+06  1.4683180E+06  1.4615589E+06  1.4548309E+06
  1.4481338E+06  1.4414676E+06  1.4348321E+06  1.4282271E+06
  1.4216525E+06  1.4151082E+06  1.4085940E+06  1.4021098E+06
  1.3956555E+06  1.3892308E+06  1.3828358E+06  1.3764701E+06
  1.3701338E+06  1.3638266E+06  1.3575485E+06  1.3512992E+06
  1.3450788E+06  1.3388870E+06  1.3327238E+06  1.3265888E+06
  1.3204820E+06  1.3144035E+06  1.3083528E+06  1.3023301E+06
  1.2963350E+06  1.2903676E+06  1.2844276E+06  1.2785150E+06
  1.2726296E+06  1.2667712E+06  1.2609399E+06  1.2551354E+06
  1.2493578E+06  1.2436065E+06  1.2378818E+06  1.2321834E+06
  1.2265112E+06  1.2208652E+06  1.2152452E+06  1.2096511E+06
  1.2040828E+06  1.1985399E+06  1.1930226E+06  1.1875308E+06
  1.1820642E+06  1.1766228E+06  1.1712064E+06  1.1658150E+06
  1.1604484E+06  1.1551065E+06  1.1497891E+06  1.1444962E+06
  1.1392278E+06  1.1339836E+06  1.1287635E+06  1.1235675E+06
  1.1183952E+06  1.1132470E+06  1.1081224E+06  1.1030212E+06
  1.0979438E+06  1.0928896E+06  1.0878588E+06  1.0828509E+06
  1.0778662E+06  1.0729045E+06  1.0679655E+06  1.0630494E+06
  1.0581558E+06  1.0532848E+06  1.0484362E+06  1.0436099E+06
  1.0388058E+06  1.0340239E+06  1.0292640E+06  1.0245259E+06
  1.0198097E+06  1.0151152E+06  1.0104423E+06  1.0057909E+06
  1.0011610E+06  9.9655231E+05  9.9196488E+05  9.8739850E+05
  9.8285325E+05  9.7832881E+05  9.7382525E+05  9.6934244E+05
  9.6488025E+05  9.6043862E+05  9.5601744E+05  9.5161656E+05
  9.4723600E+05  9.4287556E+05  9.3853519E+05  9.3421481E+05
  9.2991431E+05  9.2563362E+05  9.2137269E+05  9.1713131E+05
  9.1290944E+05  9.0870706E+05  9.0452400E+05  9.0036019E+05
  8.9621550E+05  8.9209000E+05  8.8798338E+05  8.8389575E+05
  8.7982688E+05  8.7577675E+05  8.7174525E+05  8.6773238E+05
  8.6373794E+05  8.5976188E+05  8.5580412E+05  8.5186456E+05
  8.4794319E+05  8.4403981E+05  8.4015444E+05  8.3628694E+05
  8.3243725E+05  8.2860525E+05  8.2479094E+05  8.2099419E+05
  8.1721488E+05  8.1345300E+05  8.0970838E+05  8.0598106E+05
  8.0227088E+05  7.9857775E+05  7.9490169E+05  7.9124250E+05
  7.8760012E+05  7.8397456E+05  7.8036569E+05  7.7677344E+05
  7.7319769E+05  7.6963844E+05  7.6609550E+05  7.6256894E+05
  7.5905862E+05  7.5556444E+05  7.5208631E+05  7.4862425E+05
  7.4517806E+05  7.4174775E+05  7.3833331E+05  7.3493450E+05
  7.3155138E+05  7.2818381E+05  7.2483175E+05  7.2149512E+05
  7.1817388E+05  7.1486788E+05  7.1157712E+05  7.0830150E+05
  7.0504094E+05  7.0179544E+05  6.9856488E+05  6.9534912E+05
  6.9214825E+05  6.8896206E+05  6.8579056E+05  6.8263362E+05
  6.7949125E+05  6.7636331E+05  6.7324981E+05  6.7015062E+05
  6.6706575E+05  6.6399500E+05  6.6093844E+05  6.5789594E+05
  6.5486744E+05  6.5185288E+05  6.4885219E+05  6.4586531E+05
  6.4289219E+05  6.3993275E+05  6.3698694E+05  6.3405469E+05
  6.3113594E+05  6.2823062E+05  6.2533869E+05  6.2246006E+05
  6.1959469E+05  6.1674250E+05  6.1390344E+05  6.1107744E+05
  6.0826444E+05  6.0546444E+05  6.0267725E+05  5.9990294E+05
  5.9714144E+05  5.9439256E+05  5.9165644E+05  5.8893281E+05
  5.8622175E+05  5.8352325E+05  5.8083706E+05  5.7816331E+05
  5.7550181E+05  5.7285262E+05  5.7021562E+05  5.6759069E+05
  5.6497794E+05  5.6237712E+05  5.5978831E+05  5.5721144E+05
  5.5464644E+05  5.5209325E+05  5.4955175E+05  5.4702200E+05
  5.4450388E+05  5.4199738E+05  5.3950238E+05  5.3701888E+05
  5.3454681E+05  5.3208612E+05  5.2963675E+05  5.2719869E+05
  5.2477181E+05  5.2235612E+05  5.1995156E+05  5.1755806E+05
  5.1517559E+05  5.1280406E+05  5.1044347E+05  5.0809375E+05
  5.0575481E+05  5.0342666E+05  5.0110925E+05  4.9880247E+05
  4.9650634E+05  4.9422075E+05  4.9194572E+05  4.8968112E+05
  4.8742697E+05  4.8518319E+05  4.8294975E+05  4.8072656E+05
  4.7851362E+05  4.7631088E+05  4.7411828E+05  4.7193575E+05
  4.6976328E+05  4.6760081E+05  4.6544831E+05  4.6330569E+05
  4.6117297E+05  4.5905003E+05  4.5693688E+05  4.5483347E+05
  4.5273972E+05  4.5065562E+05  4.4858109E+05  4.4651612E+05
  4.4446069E+05  4.4241469E+05  4.4037812E+05  4.3835091E+05
  4.3633306E+05  4.3432447E+05  4.3232512E+05  4.3033503E+05
  4.2835406E+05  4.2638219E+05  4.2441944E+05  4.2246569E+05
  4.2052094E+05  4.1858516E+05  4.1665828E+05  4.1474028E+05
  4.1283109E+05  4.1093069E+05  4.0903906E+05  4.0715612E+05
  4.0528184E+05  4.0341622E+05  4.0155916E+05  3.9971066E+05
  3.9787066E+05  3.9603912E+05  3.9421603E+05  3.9240134E+05
  3.9059500E+05  3.8879697E+05  3.8700722E+05  3.8522569E+05
  3.8345238E+05  3.8168722E+05  3.7993019E+05  3.7818125E+05
  3.7644038E+05  3.7470750E+05  3.7298259E+05  3.7126566E+05
  3.6955659E+05  3.6785541E+05  3.6616206E+05  3.6447650E+05
  3.6279869E+05  3.6112862E+05  3.5946622E+05  3.5781150E+05
  3.5616438E+05  3.5452484E+05  3.5289284E+05  3.5126838E+05
  3.4965138E+05  3.4804181E+05  3.4643966E+05  3.4484491E+05
  3.4325747E+05  3.4167734E+05  3.4010450E+05  3.3853888E+05
  3.3698050E+05  3.3542925E+05  3.3388519E+05  3.3234819E+05
  3.3081828E+05  3.2929544E+05  3.2777959E+05  3.2627072E+05
  3.2476878E+05  3.2327378E+05  3.2178562E+05  3.2030438E+05
  3.1882991E+05  3.1736222E+05  3.1590131E+05  3.1444712E+05
  3.1299962E+05  3.1155878E+05  3.1012456E+05  3.0869697E+05
  3.0727594E+05  3.0586144E+05  3.0445347E+05  3.0305197E+05
  3.0165694E+05  3.0026831E+05  2.9888609E+05  2.9751022E+05
  2.9614069E+05  2.9477747E+05  2.9342050E+05  2.9206981E+05
  2.9072531E+05  2.8938700E+05  2.8805488E+05  2.8672888E+05
  2.8540897E+05  2.8409512E+05  2.8278734E+05  2.8148559E+05
  2.8018984E+05  2.7890003E+05  2.7761616E+05  2.7633819E+05
  2.7506612E+05  2.7379991E+05  2.7253953E+05  2.7128494E+05
  2.7003612E+05  2.6879306E+05  2.6755572E+05  2.6632409E+05
  2.6509812E+05  2.6387778E+05  2.6266306E+05  2.6145395E+05
  2.6025041E+05  2.5905238E+05  2.5785988E+05  2.5667288E+05
  2.5549133E+05  2.5431522E+05  2.5314453E+05  2.5197922E+05
  2.5081928E+05  2.4966469E+05  2.4851541E+05  2.4737141E+05
  2.4623267E+05  2.4509919E+05  2.4397092E+05  2.4284784E+05
  2.4172994E+05  2.4061719E+05  2.3950955E+05  2.3840702E+05
  2.3730955E+05  2.3621712E+05  2.3512975E+05  2.3404738E+05
  2.3296998E+05  2.3189755E+05  2.3083005E+05  2.2976747E+05
  2.2870977E+05  2.2765695E+05  2.2660897E+05  2.2556581E+05
  2.2452747E+05  2.2349391E+05  2.2246509E+05  2.2144102E+05
  2.2042166E+05  2.1940698E+05  2.1839698E+05  2.1739162E+05
  2.1639091E+05  2.1539480E+05  2.1440327E+05  2.1341630E+05
  2.1243388E+05  2.1145597E+05  2.1048256E+05  2.0951366E+05
  2.0854920E+05  2.0758919E+05  2.0663358E+05  2.0568238E+05
  2.0473556E+05  2.0379309E+05  2.0285498E+05  2.0192117E+05
  2.0099166E+05  2.0006644E+05  1.9914547E+05  1.9822873E+05
  1.9731623E+05  1.9640792E+05  1.9550380E+05  1.9460383E+05
  1.9370800E+05  1.9281630E+05  1.9192870E+05  1.9104520E+05
  1.9016577E+05  1.8929038E+05  1.8841900E+05  1.8755166E+05
  1.8668830E+05  1.8582891E+05  1.8497348E+05  1.8412198E+05
  1.8327442E+05  1.8243075E+05  1.8159095E+05  1.8075505E+05
  1.7992297E+05  1.7909473E+05  1.7827030E+05  1.7744966E+05
  1.7663281E+05  1.7581970E+05  1.7501036E+05  1.7420473E+05
  1.7340281E+05  1.7260458E+05  1.7181003E+05  1.7101912E+05
  1.7023188E+05  1.6944825E+05  1.6866822E+05  1.6789180E+05
  1.6711894E+05  1.6634962E+05  1.6558388E+05  1.6482162E+05
  1.6406291E+05  1.6330769E+05  1.6255592E+05  1.6180762E+05
  1.6106277E+05  1.6032134E+05  1.5958334E+05  1.5884873E+05
  1.5811750E+05  1.5738962E+05  1.5666512E+05  1.5594394E+05
  1.5522608E+05  1.5451152E+05  1.5380027E+05  1.5309227E+05
  1.5238755E+05  1.5168605E+05  1.5098780E+05  1.5029275E+05
  1.4960091E+05  1.4891223E+05  1.4822675E+05  1.4754442E+05
  1.4686522E+05  1.4618916E+05  1.4551620E+05  1.4484634E+05
  1.4417956E+05  1.4351588E+05  1.4285522E+05  1.4219761E+05
  1.4154303E+05  1.4089145E+05  1.4024291E+05  1.3959731E+05
  1.3895470E+05  1.3831505E+05  1.3767834E+05  1.3704456E+05
  1.3641370E+05  1.3578575E+05  1.3516069E+05  1.3453850E+05
  1.3391919E+05  1.3330270E+05  1.3268906E+05  1.3207827E+05
  1.3147027E+05  1.3086506E+05  1.3026265E+05  1.2966301E+05
  1.2906613E+05  1.2847200E+05  1.2788060E+05  1.2729193E+05
  1.2670596E+05  1.2612269E+05  1.2554211E+05  1.2496420E+05
  1.2438895E+05  1.2381635E+05  1.2324639E+05  1.2267904E+05
  1.2211431E+05  1.2155218E+05  1.2099264E+05  1.2043567E+05
  1.1988127E+05  1.1932942E+05  1.1878011E+05  1.1823332E+05
  1.1768906E+05  1.1714730E+05  1.1660803E+05  1.1607125E+05
  1.1553694E+05  1.1500508E+05  1.1447568E+05  1.1394871E+05
  1.1342417E+05  1.1290204E+05  1.1238232E+05  1.1186499E+05
  1.1135004E+05  1.1083746E+05  1.1032724E+05  1.0981937E+05
  1.0931384E+05  1.0881063E+05  1.0830974E+05  1.0781116E+05
  1.0731487E+05  1.0682086E+05  1.0632913E+05  1.0583967E+05
  1.0535245E+05  1.0486748E+05  1.0438474E+05  1.0390423E+05
  1.0342592E+05  1.0294982E+05  1.0247591E+05  1.0200418E+05
  1.0153463E+05  1.0106723E+05  1.0057420E+05  1.0011119E+05
  9.9650320E+04  9.9191555E+04  9.8734898E+04  9.8280328E+04
  9.7827844E+04  9.7377430E+04  9.6929070E+04  9.6482750E+04
  9.6038469E+04  9.5596211E+04  9.5155969E+04  9.4717719E+04
  9.4281461E+04  9.3847180E+04  9.3414867E+04  9.2984516E+04
  9.2556102E+04  9.2129617E+04  9.1705062E+04  9.1282414E+04
  9.0861672E+04  9.0442820E+04  9.0025844E+04  8.9610734E+04
  8.9197492E+04  8.8786094E+04  8.8376531E+04  8.7968797E+04
  8.7562875E+04  8.7158766E+04  8.6756453E+04  8.6355922E+04
  8.5957172E+04  8.5560188E+04  8.5164953E+04  8.4771469E+04
  8.4379719E+04  8.3989703E+04  8.3601398E+04  8.3214797E+04
  8.2829898E+04  8.2446680E+04  8.2065148E+04  8.1685273E+04
  8.1307070E+04  8.0930508E+04  8.0555594E+04  8.0182305E+04
  7.9810633E+04  7.9440578E+04  7.9072133E+04  7.8705273E+04
  7.8340000E+04  7.7976305E+04  7.7614172E+04  7.7253602E+04
  7.6894578E+04  7.6537102E+04  7.6181148E+04  7.5826727E+04
  7.5473812E+04  7.5122406E+04  7.4772500E+04  7.4424078E+04
  7.4077141E+04  7.3731672E+04  7.3387672E+04  7.3045117E+04
  7.2704016E+04  7.2364352E+04  7.2026125E+04  7.1689312E+04
  7.1353922E+04  7.1019930E+04  7.0687344E+04  7.0356141E+04
  7.0026320E+04  6.9697883E+04  6.9370812E+04  6.9045094E+04
  6.8720734E+04  6.8397711E+04  6.8076031E+04  6.7755680E+04
  6.7436648E+04  6.7118930E+04  6.6802516E+04  6.6487406E+04
  6.6173594E+04  6.5861055E+04  6.5549797E+04  6.5239812E+04
  6.4931094E+04  6.4623625E+04  6.4317410E+04  6.4012434E+04
  6.3708695E+04  6.3406188E+04  6.3104898E+04  6.2804824E+04
  6.2505957E+04  6.2208293E+04  6.1911824E+04  6.1616543E+04
  6.1322441E+04  6.1029516E+04  6.0737762E+04  6.0447164E+04
  6.0157727E+04  5.9869438E+04  5.9582289E+04  5.9296281E+04
  5.9011398E+04  5.8727645E+04  5.8445008E+04  5.8163480E+04
  5.7883062E+04  5.7603742E+04  5.7325516E+04  5.7048379E+04
  5.6772324E+04  5.6497344E+04  5.6223434E+04  5.5950590E+04
  5.5678805E+04  5.5408070E+04  5.5138387E+04  5.4869742E+04
  5.4602133E+04  5.4335559E+04  5.4070008E+04  5.3805477E+04
  5.3541957E+04  5.3279449E+04  5.3017945E+04  5.2757441E+04
  5.2497926E+04  5.2239402E+04  5.1981859E+04  5.1725293E+04
  5.1469703E+04  5.1215078E+04  5.0961414E+04  5.0708711E+04
  5.0456957E+04  5.0206148E+04  4.9956289E+04  4.9707363E+04
  4.9459371E+04  4.9212305E+04  4.8966164E+04  4.8720945E+04
  4.8476637E+04  4.8233238E+04  4.7990742E+04  4.7749152E+04
  4.7508453E+04  4.7268648E+04  4.7029730E+04  4.6791691E+04
  4.6554535E+04  4.6318250E+04  4.6082836E+04  4.5848285E+04
  4.5614594E+04  4.5381762E+04  4.5149781E+04  4.4918652E+04
  4.4688363E+04  4.4458918E+04  4.4230309E+04  4.4002531E+04
  4.3775582E+04  4.3549457E+04  4.3324152E+04  4.3099664E+04
  4.2875988E+04  4.2653121E+04  4.2431062E+04  4.2209801E+04
  4.1989340E+04  4.1769676E+04  4.1550797E+04  4.1332707E+04
  4.1115402E+04  4.0898875E+04  4.0683125E+04  4.0468148E+04
  4.0253941E+04  4.0040500E+04  3.9827820E+04  3.9615898E+04
  3.9404734E+04  3.9194324E+04  3.8984664E+04  3.8775746E+04
  3.8567574E+04  3.8360145E+04  3.8153445E+04  3.7947484E+04
  3.7742254E+04  3.7537746E+04  3.7333969E+04  3.7130910E+04
  3.6928570E+04  3.6726945E+04  3.6526031E+04  3.6325828E+04
  3.6126336E+04  3.5927543E+04  3.5729453E+04  3.5532059E+04
  3.5335363E+04  3.5139359E+04  3.4944047E+04  3.4749422E+04
  3.4555484E+04  3.4362227E+04  3.4169648E+04  3.3977746E+04
  3.3786523E+04  3.3595969E+04  3.3406086E+04  3.3216867E+04
  3.3028316E+04  3.2840430E+04  3.2653201E+04  3.2466631E+04
  3.2280715E+04  3.2095453E+04  3.1910842E+04  3.1726879E+04
  3.1543562E+04  3.1360893E+04  3.1178861E+04  3.0997473E+04
  3.0816721E+04  3.0636605E+04  3.0457121E+04  3.0278271E+04
  3.0100051E+04  2.9922457E+04  2.9745488E+04  2.9569145E+04
  2.9393422E+04  2.9218318E+04  2.9043832E+04  2.8869963E+04
  2.8696707E+04  2.8524064E+04  2.8352033E+04  2.8180609E+04
  2.8009793E+04  2.7839580E+04  2.7669973E+04  2.7500967E+04
  2.7332561E+04  2.7164754E+04  2.6997543E+04  2.6830928E+04
  2.6664904E+04  2.6499475E+04  2.6334635E+04  2.6170385E+04
  2.6006721E+04  2.5843645E+04  2.5681152E+04  2.5519242E+04
  2.5357914E+04  2.5197166E+04  2.5036996E+04  2.4877404E+04
  2.4718389E+04  2.4559947E+04  2.4402078E+04  2.4244783E+04
  2.4088059E+04  2.3931902E+04  2.3776314E+04  2.3621295E+04
  2.3466840E+04  2.3312949E+04  2.3159621E+04  2.3006857E+04
  2.2854654E+04  2.2703010E+04  2.2551926E+04  2.2401398E+04
  2.2251428E+04  2.2102012E+04  2.1953150E+04  2.1804844E+04
  2.1657090E+04  2.1509885E+04  2.1363232E+04  2.1217129E+04
  2.1071572E+04  2.0926564E+04  2.0782104E+04  2.0638189E+04
  2.0494818E+04  2.0351990E+04  2.0209707E+04  2.0067967E+04
  1.9926766E+04  1.9786105E+04  1.9645984E+04  1.9506402E+04
  1.9367359E+04  1.9228854E+04  1.9090885E+04  1.8953449E+04
  1.8816551E+04  1.8680186E+04  1.8544354E+04  1.8409057E+04
  1.8274289E+04  1.8140055E+04  1.8006350E+04  1.7873176E+04
  1.7740531E+04  1.7608414E+04  1.7476828E+04  1.7345768E+04
  1.7215234E+04  1.7085229E+04  1.6955746E+04  1.6826791E+04
  1.6698359E+04  1.6570453E+04  1.6443070E+04  1.6316210E+04
  1.6189872E+04  1.6064056E+04  1.5938762E+04  1.5813988E+04
  1.5689735E+04  1.5566002E+04  1.5442789E+04  1.5320095E+04
  1.5197919E+04  1.5076262E+04  1.4955123E+04  1.4834500E+04
  1.4714395E+04  1.4594806E+04  1.4475733E+04  1.4357176E+04
  1.4239134E+04  1.4121608E+04  1.4004595E+04  1.3888097E+04
  1.3772113E+04  1.3656642E+04  1.3541684E+04  1.3427239E+04
  1.3313306E+04  1.3199886E+04  1.3086977E+04  1.2974579E+04
  1.2862693E+04  1.2751318E+04  1.2640452E+04  1.2530098E+04
  1.2420253E+04  1.2310917E+04  1.2202091E+04  1.2093774E+04
  1.1985966E+04  1.1878666E+04  1.1771875E+04  1.1665591E+04
  1.1559815E+04  1.1454546E+04  1.1349785E+04  1.1245530E+04
  1.1141782E+04  1.1038541E+04  1.0935805E+04  1.0833576E+04
  1.0731852E+04  1.0630634E+04  1.0529921E+04  1.0429712E+04
  1.0330009E+04  1.0230810E+04  1.0132115E+04  1.0033924E+04
  9.9362373E+03  9.8390537E+03  9.7423740E+03  9.6461973E+03
  9.5505225E+03  9.4553516E+03  9.3606826E+03  9.2665156E+03
  9.1728516E+03  9.0796885E+03  8.9870273E+03  8.8948672E+03
  8.8032080E+03  8.7120498E+03  8.6213926E+03  8.5312354E+03
  8.4415791E+03  8.3524219E+03  8.2637656E+03  8.1756074E+03
  8.0879492E+03  8.0007900E+03  7.9141294E+03  7.8279678E+03
  7.7423042E+03  7.6571382E+03  7.5724707E+03  7.4883003E+03
  7.4046274E+03  7.3214517E+03  7.2387725E+03  7.1565898E+03
  7.0749033E+03  6.9937129E+03  6.9130181E+03  6.8328188E+03
  6.7531147E+03  6.6739053E+03  6.5951904E+03  6.5169697E+03
  6.4392432E+03  6.3620103E+03  6.2852705E+03  6.2090234E+03
  6.1332695E+03  6.0580078E+03  5.9832383E+03  5.9089600E+03
  5.8351733E+03  5.7618774E+03  5.6890723E+03  5.6167573E+03
  5.5449326E+03  5.4735967E+03  5.4027505E+03  5.3323926E+03
  5.2625229E+03  5.1931411E+03  5.1242471E+03  5.0558403E+03
  4.9879199E+03  4.9204854E+03  4.8535366E+03  4.7870737E+03
  4.7210952E+03  4.6556011E+03  4.5905908E+03  4.5260640E+03
  4.4620200E+03  4.3984580E+03  4.3353784E+03  4.2727798E+03
  4.2106621E+03  4.1490249E+03  4.0878669E+03  4.0271882E+03
  3.9669880E+03  3.9072659E+03  3.8480210E+03  3.7892527E+03
  3.7309607E+03  3.6731443E+03  3.6158025E+03  3.5589351E+03
  3.5025410E+03  3.4466199E+03  3.3911709E+03  3.3361936E+03
  3.2816868E+03  3.2276501E+03  3.1740828E+03  3.1209839E+03
  3.0683528E+03  3.0161887E+03  2.9644910E+03  2.9132588E+03
  2.8624910E+03  2.8121870E+03  2.7623459E+03  2.7129670E+03
  2.6640493E+03  2.6155920E+03  2.5675942E+03  2.5200547E+03
  2.4729731E+03  2.4263481E+03  2.3801787E+03  2.3344644E+03
  2.2892036E+03  2.2443955E+03  2.2000393E+03  2.1561338E+03
  2.1126780E+03  2.0696709E+03  2.0271115E+03  1.9849983E+03
  1.9433306E+03  1.9021071E+03  1.8613267E+03  1.8209882E+03
  1.7810905E+03  1.7416323E+03  1.7026125E+03  1.6640299E+03
  1.6258831E+03  1.5881710E+03  1.5508922E+03  1.5140454E+03
  1.4776294E+03  1.4416428E+03  1.4060844E+03  1.3709525E+03
  1.3362458E+03  1.3019633E+03  1.2681031E+03  1.2346639E+03
  1.2016443E+03  1.1690427E+03  1.1368578E+03  1.1050878E+03
  1.0737314E+03  1.0427869E+03  1.0122528E+03  9.8212750E+02
  9.5240924E+02  9.2309656E+02  8.9418762E+02  8.6568091E+02
  8.3757458E+02  8.0986700E+02  7.8255634E+02  7.5564087E+02
  7.2911884E+02  7.0298834E+02  6.7724762E+02  6.5189484E+02
  6.2692804E+02  6.0234534E+02  5.7814478E+02  5.5432452E+02
  5.3088257E+02  5.0781683E+02  4.8512537E+02  4.6280612E+02
  4.4085706E+02  4.1927606E+02  3.9806104E+02  3.7720981E+02
  3.5672028E+02  3.3659027E+02  3.1681750E+02  2.9739981E+02
  2.7833493E+02  2.5962054E+02  2.4125438E+02  2.2323412E+02
  2.0555737E+02  1.8822179E+02  1.7122495E+02  1.5456441E+02
  1.3823773E+02  1.2224242E+02  1.0657598E+02  9.1235870E+01
  7.6219528E+01  6.1524361E+01  4.7147755E+01  3.3087067E+01
  1.9339634E+01  5.9027553E+00 -7.2262917E+00 -2.0050259E+01
 -3.2571922E+01 -4.4794090E+01 -5.6719597E+01 -6.8351303E+01
 -7.9692101E+01 -9.0744904E+01 -1.0151267E+02 -1.1199836E+02
 -1.2220500E+02 -1.3213560E+02 -1.4179324E+02 -1.5118100E+02
 -1.6030202E+02 -1.6915941E+02 -1.7775639E+02 -1.8609618E+02
 -1.9418198E+02 -2.0201707E+02 -2.0960477E+02 -2.1694841E+02
 -2.2405133E+02 -2.3091695E+02 -2.3754868E+02 -2.4394995E+02
 -2.5012428E+02 -2.5607520E+02 -2.6180621E+02 -2.6732092E+02
 -2.7262292E+02 -2.7771591E+02 -2.8260349E+02 -2.8728943E+02
 -2.9177744E+02 -2.9607129E+02 -3.0017480E+02 -3.0409183E+02
 -3.0782620E+02 -3.1138184E+02 -3.1476270E+02 -3.1797272E+02
 -3.2101593E+02 -3.2389636E+02 -3.2661810E+02 -3.2918524E+02
 -3.3160193E+02 -3.3387234E+02 -3.3600067E+02 -3.3799118E+02
 -3.3984814E+02 -3.4157587E+02 -3.4317871E+02 -3.4466104E+02
 -3.4602731E+02 -3.4728195E+02 -3.4842947E+02 -3.4947437E+02
 -3.5042123E+02 -3.5127463E+02 -3.5203925E+02 -3.5271970E+02
 -3.5332074E+02 -3.5384711E+02 -3.5430356E+02 -3.5469495E+02
 -3.5502609E+02 -3.5530191E+02 -3.5552731E+02 -3.5570728E+02
 -3.5584683E+02 -3.5595099E+02 -3.5602487E+02 -3.5607355E+02
 -3.5610223E+02 -3.5611606E+02 -3.5612033E+02 -3.5616080E+02
 -3.5615857E+02 -3.5615424E+02 -3.5614786E+02 -3.5613940E+02
 -3.5612888E+02 -3.5611630E+02 -3.5610168E+02 -3.5608502E+02
 -3.5606631E+02 -3.5604556E+02 -3.5602277E+02 -3.5599799E+02
 -3.5597116E+02 -3.5594229E+02 -3.5591144E+02 -3.5587857E+02
 -3.5584369E+02 -3.5580682E+02 -3.5576797E+02 -3.5572711E+02
 -3.5568427E+02 -3.5563947E+02 -3.5559268E+02 -3.5554391E+02
 -3.5549319E+02 -3.5544049E+02 -3.5538586E+02 -3.5532925E+02
 -3.5527072E+02 -3.5521024E+02 -3.5514780E+02 -3.5508347E+02
 -3.5501718E+02 -3.5494897E+02 -3.5487885E+02 -3.5480682E+02
 -3.5473288E+02 -3.5465704E+02 -3.5457928E+02 -3.5449966E+02
 -3.5441812E+02 -3.5433472E+02 -3.5424942E+02 -3.5416226E+02
 -3.5407321E+02 -3.5398233E+02 -3.5388956E+02 -3.5379492E+02
 -3.5369846E+02 -3.5360013E+02 -3.5349997E+02 -3.5339798E+02
 -3.5329416E+02 -3.5318851E+02 -3.5308102E+02 -3.5297171E+02
 -3.5286060E+02 -3.5274768E+02 -3.5263297E+02 -3.5251645E+02
 -3.5239813E+02 -3.5227802E+02 -3.5215613E+02 -3.5203244E+02
 -3.5190701E+02 -3.5177979E+02 -3.5165079E+02 -3.5152005E+02
 -3.5138757E+02 -3.5125330E+02 -3.5111731E+02 -3.5097955E+02
 -3.5084009E+02 -3.5069888E+02 -3.5055594E+02 -3.5041125E+02
 -3.5026489E+02 -3.5011679E+02 -3.4996698E+02 -3.4981549E+02
 -3.4966229E+02 -3.4950739E+02 -3.4935077E+02 -3.4919250E+02
 -3.4903256E+02 -3.4887091E+02 -3.4870761E+02 -3.4854263E+02
 -3.4837601E+02 -3.4820773E+02 -3.4803778E+02 -3.4786621E+02
 -3.4769296E+02 -3.4751810E+02 -3.4734161E+02 -3.4716348E+02
 -3.4698373E+02 -3.4680237E+02 -3.4661938E+02 -3.4643478E+02
 -3.4624860E+02 -3.4606079E+02 -3.4587140E+02 -3.4568042E+02
 -3.4548785E+02 -3.4529370E+02 -3.4509799E+02 -3.4490070E+02
 -3.4470184E+02 -3.4450143E+02 -3.4429944E+02 -3.4409592E+02
 -3.4389084E+02 -3.4368420E+02 -3.4347607E+02 -3.4326636E+02
 -3.4305515E+02 -3.4284241E+02 -3.4262814E+02 -3.4241238E+02
 -3.4219507E+02 -3.4197629E+02 -3.4175601E+02 -3.4153421E+02
 -3.4131094E+02 -3.4108618E+02 -3.4085995E+02 -3.4063223E+02
 -3.4040305E+02 -3.4017239E+02 -3.3994028E+02 -3.3970670E+02
 -3.3947168E+02 -3.3923520E+02 -3.3899728E+02 -3.3875793E+02
 -3.3851715E+02 -3.3827493E+02 -3.3803128E+02 -3.3778622E+02
 -3.3753976E+02 -3.3729187E+02 -3.3704260E+02 -3.3679190E+02
 -3.3653983E+02 -3.3628635E+02 -3.3603149E+02 -3.3577524E+02
 -3.3551764E+02 -3.3525864E+02 -3.3499829E+02 -3.3473657E+02
 -3.3447351E+02 -3.3420908E+02 -3.3394330E+02 -3.3367618E+02
 -3.3340771E+02 -3.3313794E+02 -3.3286682E+02 -3.3259439E+02
 -3.3232062E+02 -3.3204556E+02 -3.3176917E+02 -3.3149149E+02
 -3.3121249E+02 -3.3093219E+02 -3.3065063E+02 -3.3036777E+02
 -3.3008362E+02 -3.2979819E+02 -3.2951151E+02 -3.2922354E+02
 -3.2893433E+02 -3.2864386E+02 -3.2835211E+02 -3.2805914E+02
 -3.2776492E+02 -3.2746945E+02 -3.2717276E+02 -3.2687485E+02
 -3.2657571E+02 -3.2627533E+02 -3.2597375E+02 -3.2567096E+02
 -3.2536697E+02 -3.2506177E+02 -3.2475537E+02 -3.2444778E+02
 -3.2413901E+02 -3.2382907E+02 -3.2351794E+02 -3.2320563E+02
 -3.2289218E+02 -3.2257755E+02 -3.2226175E+02 -3.2194482E+02
 -3.2162671E+02 -3.2130750E+02 -3.2098712E+02 -3.2066562E+02
 -3.2034299E+02 -3.2001923E+02 -3.1969434E+02 -3.1936835E+02
 -3.1904126E+02 -3.1871304E+02 -3.1838373E+02 -3.1805331E+02
 -3.1772183E+02 -3.1738925E+02 -3.1705557E+02 -3.1672083E+02
 -3.1638501E+02 -3.1604813E+02 -3.1571021E+02 -3.1537119E+02
 -3.1503113E+02 -3.1469003E+02 -3.1434790E+02 -3.1400470E+02
 -3.1366049E+02 -3.1331522E+02 -3.1296896E+02 -3.1262167E+02
 -3.1227335E+02 -3.1192404E+02 -3.1157370E+02 -3.1122238E+02
 -3.1087006E+02 -3.1051675E+02 -3.1016245E+02 -3.0980716E+02
 -3.0945090E+02 -3.0909366E+02 -3.0873547E+02 -3.0837631E+02
 -3.0801620E+02 -3.0765512E+02 -3.0729309E+02 -3.0693011E+02
 -3.0656622E+02 -3.0620139E+02 -3.0583560E+02 -3.0546890E+02
 -3.0510129E+02 -3.0473276E+02 -3.0436334E+02 -3.0399298E+02
 -3.0362173E+02 -3.0324960E+02 -3.0287656E+02 -3.0250262E+02
 -3.0212781E+02 -3.0175214E+02 -3.0137558E+02 -3.0099817E+02
 -3.0061987E+02 -3.0024072E+02 -2.9986072E+02 -2.9947989E+02
 -2.9909818E+02 -2.9871567E+02 -2.9833231E+02 -2.9794809E+02
 -2.9756308E+02 -2.9717725E+02 -2.9679059E+02 -2.9640311E+02
 -2.9601486E+02 -2.9562576E+02 -2.9523590E+02 -2.9484525E+02
 -2.9445380E+02 -2.9406155E+02 -2.9366855E+02 -2.9327475E+02
 -2.9288022E+02 -2.9248489E+02 -2.9208881E+02 -2.9169199E+02
 -2.9129443E+02 -2.9089609E+02 -2.9049704E+02 -2.9009723E+02
 -2.8969672E+02 -2.8929547E+02 -2.8889349E+02 -2.8849081E+02
 -2.8808740E+02 -2.8768332E+02 -2.8727850E+02 -2.8687299E+02
 -2.8646680E+02 -2.8605991E+02 -2.8565237E+02 -2.8524411E+02
 -2.8483521E+02 -2.8442563E+02 -2.8401538E+02 -2.8360446E+02
 -2.8319290E+02 -2.8278070E+02 -2.8236783E+02 -2.8195435E+02
 -2.8154022E+02 -2.8112546E+02 -2.8071008E+02 -2.8029407E+02
 -2.7987744E+02 -2.7946021E+02 -2.7904236E+02 -2.7862393E+02
 -2.7820490E+02 -2.7778525E+02 -2.7736505E+02 -2.7694424E+02
 -2.7652286E+02 -2.7610089E+02 -2.7567838E+02 -2.7525531E+02
 -2.7483167E+02 -2.7440747E+02 -2.7398270E+02 -2.7355740E+02
 -2.7313159E+02 -2.7270520E+02 -2.7227832E+02 -2.7185089E+02
 -2.7142294E+02 -2.7099448E+02 -2.7056552E+02 -2.7013602E+02
 -2.6970605E+02 -2.6927557E+02 -2.6884460E+02 -2.6841312E+02
 -2.6798120E+02 -2.6754877E+02 -2.6711588E+02 -2.6668250E+02
 -2.6624869E+02 -2.6581439E+02 -2.6537967E+02 -2.6494446E+02
 -2.6450882E+02 -2.6407275E+02 -2.6363623E+02 -2.6319931E+02
 -2.6276193E+02 -2.6232413E+02 -2.6188593E+02 -2.6144730E+02
 -2.6100830E+02 -2.6056885E+02 -2.6012903E+02 -2.5968881E+02
 -2.5924820E+02 -2.5880722E+02 -2.5836584E+02 -2.5792410E+02
 -2.5748199E+02 -2.5703952E+02 -2.5659668E+02 -2.5615350E+02
 -2.5570996E+02 -2.5526608E+02 -2.5482185E+02 -2.5437729E+02
 -2.5393240E+02 -2.5348718E+02 -2.5304164E+02 -2.5259579E+02
 -2.5214961E+02 -2.5170314E+02 -2.5125636E+02 -2.5080930E+02
 -2.5036192E+02 -2.4991428E+02 -2.4946632E+02 -2.4901811E+02
 -2.4856961E+02 -2.4812085E+02 -2.4767181E+02 -2.4722253E+02
 -2.4677299E+02 -2.4632320E+02 -2.4587317E+02 -2.4542290E+02
 -2.4497238E+02 -2.4452164E+02 -2.4407066E+02 -2.4361948E+02
 -2.4316806E+02 -2.4271643E+02 -2.4226460E+02 -2.4181258E+02
 -2.4136034E+02 -2.4090791E+02 -2.4045531E+02 -2.4000250E+02
 -2.3954953E+02 -2.3909637E+02 -2.3864307E+02 -2.3818958E+02
 -2.3773595E+02 -2.3728214E+02 -2.3682819E+02 -2.3637410E+02
 -2.3591986E+02 -2.3546548E+02 -2.3501099E+02 -2.3455635E+02
 -2.3410159E+02 -2.3364673E+02 -2.3319176E+02 -2.3273666E+02
 -2.3228146E+02 -2.3182619E+02 -2.3137080E+02 -2.3091531E+02
 -2.3045976E+02 -2.3000414E+02 -2.2954842E+02 -2.2909264E+02
 -2.2863680E+02 -2.2818089E+02 -2.2772493E+02 -2.2726892E+02
 -2.2681287E+02 -2.2635677E+02 -2.2590063E+02 -2.2544446E+02
 -2.2498827E+02 -2.2453204E+02 -2.2407582E+02 -2.2361958E+02
 -2.2316331E+02 -2.2270708E+02 -2.2225081E+02 -2.2179456E+02
 -2.2133832E+02 -2.2088210E+02 -2.2042590E+02 -2.1996973E+02
 -2.1951358E+02 -2.1905746E+02 -2.1860139E+02 -2.1814537E+02
 -2.1768939E+02 -2.1723347E+02 -2.1677760E+02 -2.1632179E+02
 -2.1586607E+02 -2.1541042E+02 -2.1495482E+02 -2.1449931E+02
 -2.1404391E+02 -2.1358859E+02 -2.1313336E+02 -2.1267824E+02
 -2.1222322E+02 -2.1176831E+02 -2.1131352E+02 -2.1085886E+02
 -2.1040430E+02 -2.0994987E+02 -2.0949561E+02 -2.0904146E+02
 -2.0858746E+02 -2.0813361E+02 -2.0767992E+02 -2.0722638E+02
 -2.0677301E+02 -2.0631979E+02 -2.0586678E+02 -2.0541391E+02
 -2.0496123E+02 -2.0450874E+02 -2.0405646E+02 -2.0360435E+02
 -2.0315245E+02 -2.0270076E+02 -2.0224928E+02 -2.0179800E+02
 -2.0134697E+02 -2.0089615E+02 -2.0044556E+02 -1.9999519E+02
 -1.9954507E+02 -1.9909520E+02 -1.9864558E+02 -1.9819621E+02
 -1.9774709E+02 -1.9729823E+02 -1.9684966E+02 -1.9640135E+02
 -1.9595331E+02 -1.9550555E+02 -1.9505809E+02 -1.9461092E+02
 -1.9416405E+02 -1.9371747E+02 -1.9327119E+02 -1.9282523E+02
 -1.9237959E+02 -1.9193427E+02 -1.9148926E+02 -1.9104459E+02
 -1.9060025E+02 -1.9015625E+02 -1.8971260E+02 -1.8926929E+02
 -1.8882634E+02 -1.8838374E+02 -1.8794151E+02 -1.8749963E+02
 -1.8705815E+02 -1.8661703E+02 -1.8617630E+02 -1.8573595E+02
 -1.8529599E+02 -1.8485643E+02 -1.8441727E+02 -1.8397852E+02
 -1.8354018E+02 -1.8310223E+02 -1.8266473E+02 -1.8222765E+02
 -1.8179099E+02 -1.8135477E+02 -1.8091898E+02 -1.8048364E+02
 -1.8004875E+02 -1.7961430E+02 -1.7918033E+02 -1.7874681E+02
 -1.7831377E+02 -1.7788118E+02 -1.7744907E+02 -1.7701746E+02
 -1.7658632E+02 -1.7615567E+02 -1.7572552E+02 -1.7529587E+02
 -1.7486673E+02 -1.7443810E+02 -1.7400998E+02 -1.7358238E+02
 -1.7315530E+02 -1.7272876E+02 -1.7230275E+02 -1.7187727E+02
 -1.7145235E+02 -1.7102795E+02 -1.7060413E+02 -1.7018085E+02
 -1.6975813E+02 -1.6933600E+02 -1.6891443E+02 -1.6849342E+02
 -1.6807301E+02 -1.6765318E+02 -1.6723395E+02 -1.6681531E+02
 -1.6639726E+02 -1.6597983E+02 -1.6556300E+02 -1.6514680E+02
 -1.6473120E+02 -1.6431622E+02 -1.6390189E+02 -1.6348819E+02
 -1.6307512E+02 -1.6266269E+02 -1.6225092E+02 -1.6183978E+02
 -1.6142932E+02 -1.6101952E+02 -1.6061037E+02 -1.6020190E+02
 -1.5979411E+02 -1.5938699E+02 -1.5898058E+02 -1.5857484E+02
 -1.5816980E+02 -1.5776547E+02 -1.5736183E+02 -1.5695891E+02
 -1.5655669E+02 -1.5615520E+02 -1.5575444E+02 -1.5535440E+02
 -1.5495509E+02 -1.5455652E+02 -1.5415871E+02 -1.5376163E+02
 -1.5336530E+02 -1.5296973E+02 -1.5257492E+02 -1.5218088E+02
 -1.5178761E+02 -1.5139511E+02 -1.5100340E+02 -1.5061247E+02
 -1.5022234E+02 -1.4983299E+02 -1.4944446E+02 -1.4905672E+02
 -1.4866978E+02 -1.4828368E+02 -1.4789838E+02 -1.4751392E+02
 -1.4713026E+02 -1.4674747E+02 -1.4636548E+02 -1.4598434E+02
 -1.4560406E+02 -1.4522464E+02 -1.4484607E+02 -1.4446835E+02
 -1.4409151E+02 -1.4371555E+02 -1.4334044E+02 -1.4296622E+02
 -1.4259288E+02 -1.4222044E+02 -1.4184889E+02 -1.4147824E+02
 -1.4110851E+02 -1.4073965E+02 -1.4037173E+02 -1.4000475E+02
 -1.3963866E+02 -1.3927351E+02 -1.3890929E+02 -1.3854601E+02
 -1.3818367E+02 -1.3782228E+02 -1.3746184E+02 -1.3710236E+02
 -1.3674384E+02 -1.3638628E+02 -1.3602969E+02 -1.3567409E+02
 -1.3531944E+02 -1.3496581E+02 -1.3461314E+02 -1.3426149E+02
 -1.3391083E+02 -1.3356117E+02 -1.3321252E+02 -1.3286488E+02
 -1.3251828E+02 -1.3217268E+02 -1.3182812E+02 -1.3148459E+02
 -1.3114584E+02 -1.3080440E+02 -1.3046397E+02 -1.3012459E+02
 -1.2978624E+02 -1.2944891E+02 -1.2911261E+02 -1.2877731E+02
 -1.2844305E+02 -1.2810980E+02 -1.2777755E+02 -1.2744630E+02
 -1.2711606E+02 -1.2678682E+02 -1.2645857E+02 -1.2613131E+02
 -1.2580503E+02 -1.2547975E+02 -1.2515544E+02 -1.2483211E+02
 -1.2450976E+02 -1.2418837E+02 -1.2386795E+02 -1.2354850E+02
 -1.2323001E+02 -1.2291247E+02 -1.2259589E+02 -1.2228026E+02
 -1.2196558E+02 -1.2165184E+02 -1.2133905E+02 -1.2102719E+02
 -1.2071626E+02 -1.2040627E+02 -1.2009721E+02 -1.1978907E+02
 -1.1948185E+02 -1.1917555E+02 -1.1887017E+02 -1.1856570E+02
 -1.1826214E+02 -1.1795949E+02 -1.1765774E+02 -1.1735689E+02
 -1.1705693E+02 -1.1675787E+02 -1.1645970E+02 -1.1616242E+02
 -1.1586603E+02 -1.1557051E+02 -1.1527588E+02 -1.1498212E+02
 -1.1468924E+02 -1.1439722E+02 -1.1410607E+02 -1.1381579E+02
 -1.1352636E+02 -1.1323780E+02 -1.1295009E+02 -1.1266323E+02
 -1.1237722E+02 -1.1209206E+02 -1.1180775E+02 -1.1152427E+02
 -1.1124163E+02 -1.1095983E+02 -1.1067886E+02 -1.1039872E+02
 -1.1011941E+02 -1.0984092E+02 -1.0956325E+02 -1.0928640E+02
 -1.0901036E+02 -1.0873514E+02 -1.0846073E+02 -1.0818713E+02
 -1.0791433E+02 -1.0764234E+02 -1.0737114E+02 -1.0710074E+02
 -1.0683114E+02 -1.0656232E+02 -1.0629430E+02 -1.0602706E+02
 -1.0576060E+02 -1.0549493E+02 -1.0523003E+02 -1.0496591E+02
 -1.0470257E+02 -1.0443999E+02 -1.0417818E+02 -1.0391714E+02
 -1.0365686E+02 -1.0339734E+02 -1.0313857E+02 -1.0288056E+02
 -1.0262331E+02 -1.0236681E+02 -1.0211105E+02 -1.0185604E+02
 -1.0160177E+02 -1.0134824E+02 -1.0109545E+02 -1.0084339E+02
 -1.0059207E+02 -1.0034148E+02 -1.0009161E+02 -9.9842468E+01
 -9.9594055E+01 -9.9346359E+01 -9.9099388E+01 -9.8853127E+01
 -9.8607574E+01 -9.8362740E+01 -9.8118614E+01 -9.7875198E+01
 -9.7632477E+01 -9.7390465E+01 -9.7149155E+01 -9.6908531E+01
 -9.6668610E+01 -9.6429382E+01 -9.6190842E+01 -9.5952995E+01
 -9.5715828E+01 -9.5479347E+01 -9.5243546E+01 -9.5008430E+01
 -9.4773979E+01 -9.4540215E+01 -9.4307114E+01 -9.4074692E+01
 -9.3842934E+01 -9.3611839E+01 -9.3381409E+01 -9.3151642E+01
 -9.2922531E+01 -9.2694084E+01 -9.2466286E+01 -9.2239143E+01
 -9.2012650E+01 -9.1786804E+01 -9.1561607E+01 -9.1337059E+01
 -9.1113144E+01 -9.0889877E+01 -9.0667244E+01 -9.0445244E+01
 -9.0223885E+01 -9.0003151E+01 -8.9783051E+01 -8.9563576E+01
 -8.9344727E+01 -8.9126503E+01 -8.8908897E+01 -8.8691917E+01
 -8.8475555E+01 -8.8259804E+01 -8.8044662E+01 -8.7830139E+01
 -8.7616226E+01 -8.7402916E+01 -8.7190216E+01 -8.6978119E+01
 -8.6766617E+01 -8.6555725E+01 -8.6345421E+01 -8.6135719E+01
 -8.5926613E+01 -8.5718094E+01 -8.5510162E+01 -8.5302826E+01
 -8.5096077E+01 -8.4889908E+01 -8.4684319E+01 -8.4479317E+01
 -8.4274887E+01 -8.4071037E+01 -8.3867760E+01 -8.3665062E+01
 -8.3462929E+01 -8.3261368E+01 -8.3060379E+01 -8.2859947E+01
 -8.2660088E+01 -8.2460785E+01 -8.2262047E+01 -8.2063866E+01
 -8.1866241E+01 -8.1669167E+01 -8.1472656E+01 -8.1276688E+01
 -8.1081268E+01 -8.0886406E+01 -8.0692085E+01 -8.0498306E+01
 -8.0305069E+01 -8.0112373E+01 -7.9920219E+01 -7.9728607E+01
 -7.9537521E+01 -7.9346977E+01 -7.9156960E+01 -7.8967476E+01
 -7.8778526E+01 -7.8590096E+01 -7.8402191E+01 -7.8214813E+01
 -7.8027962E+01 -7.7841621E+01 -7.7655807E+01 -7.7470512E+01
 -7.7285728E+01 -7.7101456E+01 -7.6917702E+01 -7.6734451E+01
 -7.6551720E+01 -7.6369484E+01 -7.6187759E+01 -7.6006538E+01
 -7.5825829E+01 -7.5645607E+01 -7.5465897E+01 -7.5286674E+01
 -7.5107956E+01 -7.4929726E+01 -7.4751991E+01 -7.4574753E+01
 -7.4397995E+01 -7.4221733E+01 -7.4045959E+01 -7.3870667E+01
 -7.3695862E+01 -7.3521538E+01 -7.3347687E+01 -7.3174324E+01
 -7.3001442E+01 -7.2829025E+01 -7.2657089E+01 -7.2485634E+01
 -7.2314636E+01 -7.2144119E+01 -7.1974068E+01 -7.1804489E+01
 -7.1635368E+01 -7.1466713E+01 -7.1298523E+01 -7.1130798E+01
 -7.0963531E+01 -7.0796722E+01 -7.0630371E+01 -7.0464470E+01
 -7.0299026E+01 -7.0134041E+01 -6.9969505E+01 -6.9805420E+01
 -6.9641777E+01 -6.9478584E+01 -6.9315842E+01 -6.9153542E+01
 -6.8991684E+01 -6.8830269E+01 -6.8669296E+01 -6.8508759E+01
 -6.8348663E+01 -6.8188995E+01 -6.8029770E+01 -6.7870979E+01
 -6.7712616E+01 -6.7554688E+01 -6.7397186E+01 -6.7240112E+01
 -6.7083466E+01 -6.6927246E+01 -6.6771454E+01 -6.6616081E+01
 -6.6461128E+01 -6.6306595E+01 -6.6152489E+01 -6.5998795E+01
 -6.5845512E+01 -6.5692650E+01 -6.5540199E+01 -6.5388168E+01
 -6.5236542E+01 -6.5085327E+01 -6.4934525E+01 -6.4784126E+01
 -6.4634132E+01 -6.4484543E+01 -6.4335358E+01 -6.4186577E+01
 -6.4038200E+01 -6.3890221E+01 -6.3742641E+01 -6.3595455E+01
 -6.3448669E+01 -6.3302277E+01 -6.3156281E+01 -6.3010674E+01
 -6.2865463E+01 -6.2720638E+01 -6.2576202E+01 -6.2432156E+01
 -6.2288498E+01 -6.2145222E+01 -6.2002335E+01 -6.1859825E+01
 -6.1717701E+01 -6.1575958E+01 -6.1434593E+01 -6.1293610E+01
 -6.1153000E+01 -6.1012768E+01 -6.0872910E+01 -6.0733425E+01
 -6.0594315E+01 -6.0455578E+01 -6.0317207E+01 -6.0179211E+01
 -6.0041576E+01 -5.9904312E+01 -5.9767414E+01 -5.9630882E+01
 -5.9494713E+01 -5.9358906E+01 -5.9223461E+01 -5.9088375E+01
 -5.8953651E+01 -5.8819283E+01 -5.8685272E+01 -5.8551620E+01
 -5.8418320E+01 -5.8285374E+01 -5.8152782E+01 -5.8020542E+01
 -5.7888653E+01 -5.7757114E+01 -5.7625919E+01 -5.7495075E+01
 -5.7364578E+01 -5.7234428E+01 -5.7104622E+01 -5.6975155E+01
 -5.6846031E+01 -5.6717251E+01 -5.6588814E+01 -5.6460709E+01
 -5.6332947E+01 -5.6205521E+01 -5.6078430E+01 -5.5951675E+01
 -5.5825256E+01 -5.5699169E+01 -5.5573414E+01 -5.5447990E+01
 -5.5322895E+01 -5.5198132E+01 -5.5073692E+01 -5.4949581E+01
 -5.4825802E+01 -5.4702339E+01 -5.4579208E+01 -5.4456394E+01
 -5.4333908E+01 -5.4211742E+01 -5.4089893E+01 -5.3968365E+01
 -5.3847157E+01 -5.3726265E+01 -5.3605690E+01 -5.3485432E+01
 -5.3365486E+01 -5.3245853E+01 -5.3126537E+01 -5.3007530E+01
 -5.2888836E+01 -5.2770451E+01 -5.2652370E+01 -5.2534603E+01
 -5.2417141E+01 -5.2299988E+01 -5.2183136E+01 -5.2066593E+01
 -5.1950352E+01 -5.1834412E+01 -5.1718773E+01 -5.1603439E+01
 -5.1488400E+01 -5.1373665E+01 -5.1259224E+01 -5.1145084E+01
 -5.1031239E+01 -5.0917686E+01 -5.0804432E+01 -5.0691471E+01
 -5.0578804E+01 -5.0466427E+01 -5.0354340E+01 -5.0242546E+01
 -5.0131039E+01 -5.0019821E+01 -4.9908894E+01 -4.9798252E+01
 -4.9687897E+01 -4.9577824E+01 -4.9468037E+01 -4.9358536E+01
 -4.9249313E+01 -4.9140377E+01 -4.9031719E+01 -4.8923340E+01
 -4.8815243E+01 -4.8707424E+01 -4.8599880E+01 -4.8492619E+01
 -4.8385628E+01 -4.8278915E+01 -4.8172478E+01 -4.8066311E+01
 -4.7960419E+01 -4.7854797E+01 -4.7749451E+01 -4.7644371E+01
 -4.7539562E+01 -4.7435024E+01 -4.7330750E+01 -4.7226746E+01
 -4.7123009E+01 -4.7019535E+01 -4.6916328E+01 -4.6813385E+01
 -4.6710705E+01 -4.6608288E+01 -4.6506134E+01 -4.6404240E+01
 -4.6302605E+01 -4.6201233E+01 -4.6100117E+01 -4.5999260E+01
 -4.5898659E+01 -4.5798317E+01 -4.5698231E+01 -4.5598396E+01
 -4.5498821E+01 -4.5399494E+01 -4.5300423E+01 -4.5201607E+01
 -4.5103039E+01 -4.5004719E+01 -4.4906651E+01 -4.4808834E+01
 -4.4711266E+01 -4.4613941E+01 -4.4516869E+01 -4.4420040E+01
 -4.4323456E+01 -4.4227119E+01 -4.4131023E+01 -4.4035175E+01
 -4.3939568E+01 -4.3844204E+01 -4.3749081E+01 -4.3654198E+01
 -4.3559551E+01 -4.3465149E+01 -4.3370983E+01 -4.3277058E+01
 -4.3183365E+01 -4.3089912E+01 -4.2996693E+01 -4.2903713E+01
 -4.2810963E+01 -4.2718449E+01 -4.2626167E+01 -4.2534119E+01
 -4.2442303E+01 -4.2350719E+01 -4.2259361E+01 -4.2168236E+01
 -4.2077339E+01 -4.1986671E+01 -4.1896233E+01 -4.1806023E+01
 -4.1716034E+01 -4.1626274E+01 -4.1536739E+01 -4.1447430E+01
 -4.1358345E+01 -4.1269482E+01 -4.1180840E+01 -4.1092422E+01
 -4.1004227E+01 -4.0916248E+01 -4.0828491E+01 -4.0740955E+01
 -4.0653641E+01 -4.0566540E+01 -4.0479656E+01 -4.0392994E+01
 -4.0306545E+01 -4.0220310E+01 -4.0134296E+01 -4.0048492E+01
 -3.9962902E+01 -3.9877525E+01 -3.9792362E+01 -3.9707413E+01
 -3.9622673E+01 -3.9538147E+01 -3.9453827E+01 -3.9369720E+01
 -3.9285820E+01 -3.9202129E+01 -3.9118649E+01 -3.9035374E+01
 -3.8952305E+01 -3.8869438E+01 -3.8786785E+01 -3.8704330E+01
 -3.8622086E+01 -3.8540039E+01 -3.8458199E+01 -3.8376560E+01
 -3.8295128E+01 -3.8213894E+01 -3.8132858E+01 -3.8052029E+01
 -3.7971394E+01 -3.7890961E+01 -3.7810726E+01 -3.7730686E+01
 -3.7650848E+01 -3.7571205E+01 -3.7491760E+01 -3.7412510E+01
 -3.7333458E+01 -3.7254597E+01 -3.7175934E+01 -3.7097462E+01
 -3.7019180E+01 -3.6941097E+01 -3.6863201E+01 -3.6785500E+01
 -3.6707989E+01 -3.6630669E+01 -3.6553539E+01 -3.6476597E+01
 -3.6399845E+01 -3.6323280E+01 -3.6246902E+01 -3.6170715E+01
 -3.6094711E+01 -3.6018898E+01 -3.5943268E+01 -3.5867821E+01
 -3.5792561E+01 -3.5717484E+01 -3.5642593E+01 -3.5567883E+01
 -3.5493359E+01 -3.5419010E+01 -3.5344849E+01 -3.5270866E+01
 -3.5197067E+01 -3.5123444E+01 -3.5050003E+01 -3.4976742E+01
 -3.4903656E+01 -3.4830750E+01 -3.4758022E+01 -3.4685471E+01
 -3.4613098E+01 -3.4540897E+01 -3.4468876E+01 -3.4397030E+01
 -3.4325356E+01 -3.4253857E+01 -3.4182533E+01 -3.4111382E+01
 -3.4040401E+01 -3.3969597E+01 -3.3898960E+01 -3.3828495E+01
 -3.3758202E+01 -3.3688080E+01 -3.3618126E+01 -3.3548344E+01
 -3.3478729E+01 -3.3409283E+01 -3.3340008E+01 -3.3270893E+01
 -3.3201954E+01 -3.3133175E+01 -3.3064564E+01 -3.2996120E+01
 -3.2927841E+01 -3.2859726E+01 -3.2791775E+01 -3.2723988E+01
 -3.2656364E+01 -3.2588905E+01 -3.2521606E+01 -3.2454472E+01
 -3.2387497E+01 -3.2320686E+01 -3.2254032E+01 -3.2187542E+01
 -3.2121208E+01 -3.2055038E+01 -3.1989023E+01 -3.1923168E+01
 -3.1857471E+01 -3.1791933E+01 -3.1726551E+01 -3.1661325E+01
 -3.1596258E+01 -3.1531345E+01 -3.1466587E+01 -3.1401985E+01
 -3.1337538E+01 -3.1273245E+01 -3.1209106E+01 -3.1145121E+01
 -3.1081287E+01 -3.1017607E+01 -3.0954079E+01 -3.0890703E+01
 -3.0827478E+01 -3.0764404E+01 -3.0701481E+01 -3.0638706E+01
 -3.0576082E+01 -3.0513609E+01 -3.0451283E+01 -3.0389105E+01
 -3.0327076E+01 -3.0265196E+01 -3.0203461E+01 -3.0141872E+01
 -3.0080433E+01 -3.0019138E+01 -2.9957989E+01 -2.9896984E+01
 -2.9836126E+01 -2.9775412E+01 -2.9714842E+01 -2.9654413E+01
 -2.9594131E+01 -2.9533991E+01 -2.9473991E+01 -2.9414137E+01
 -2.9354422E+01 -2.9294849E+01 -2.9235418E+01 -2.9176126E+01
 -2.9116976E+01 -2.9057964E+01 -2.8999094E+01 -2.8940363E+01
 -2.8881767E+01 -2.8823313E+01 -2.8764996E+01 -2.8706816E+01
 -2.8648773E+01 -2.8590868E+01 -2.8533098E+01 -2.8475466E+01
 -2.8417969E+01 -2.8360607E+01 -2.8303381E+01 -2.8246288E+01
 -2.8189331E+01 -2.8132507E+01 -2.8075817E+01 -2.8019260E+01
 -2.7962835E+01 -2.7906544E+01 -2.7850386E+01 -2.7794357E+01
 -2.7738461E+01 -2.7682695E+01 -2.7627062E+01 -2.7571558E+01
 -2.7516184E+01 -2.7460939E+01 -2.7405825E+01 -2.7350840E+01
 -2.7295982E+01 -2.7241255E+01 -2.7186653E+01 -2.7132179E+01
 -2.7077833E+01 -2.7023615E+01 -2.6969522E+01 -2.6915558E+01
 -2.6861717E+01 -2.6808002E+01 -2.6754414E+01 -2.6700949E+01
 -2.6647610E+01 -2.6594395E+01 -2.6541302E+01 -2.6488335E+01
 -2.6435490E+01 -2.6382769E+01 -2.6330170E+01 -2.6277693E+01
 -2.6225338E+01 -2.6173105E+01 -2.6120993E+01 -2.6069002E+01
 -2.6017134E+01 -2.5965384E+01 -2.5913754E+01 -2.5862244E+01
 -2.5810852E+01 -2.5759583E+01 -2.5708429E+01 -2.5657394E+01
 -2.5606480E+01 -2.5555681E+01 -2.5505001E+01 -2.5454437E+01
 -2.5403992E+01 -2.5353661E+01 -2.5303448E+01 -2.5253349E+01
 -2.5203367E+01 -2.5153502E+01 -2.5103750E+01 -2.5054113E+01
 -2.5004591E+01 -2.4955183E+01 -2.4905890E+01 -2.4856709E+01
 -2.4807640E+01 -2.4758686E+01 -2.4709845E+01 -2.4661116E+01
 -2.4612497E+01 -2.4563993E+01 -2.4515598E+01 -2.4467316E+01
 -2.4419144E+01 -2.4371082E+01 -2.4323132E+01 -2.4275291E+01
 -2.4227560E+01 -2.4179937E+01 -2.4132425E+01 -2.4085022E+01
 -2.4037727E+01 -2.3990540E+01 -2.3943460E+01 -2.3896490E+01
 -2.3849627E+01 -2.3802872E+01 -2.3756222E+01 -2.3709679E+01
 -2.3663242E+01 -2.3616913E+01 -2.3570686E+01 -2.3524569E+01
 -2.3478554E+01 -2.3432646E+01 -2.3386841E+01 -2.3341141E+01
 -2.3295546E+01 -2.3250053E+01 -2.3204666E+01 -2.3159382E+01
 -2.3114201E+01 -2.3069120E+01 -2.3024143E+01 -2.2979271E+01
 -2.2934498E+01 -2.2889828E+01 -2.2845259E+01 -2.2800791E+01
 -2.2756426E+01 -2.2712158E+01 -2.2667994E+01 -2.2623928E+01
 -2.2579962E+01 -2.2536097E+01 -2.2492331E+01 -2.2448664E+01
 -2.2405094E+01 -2.2361624E+01 -2.2318253E+01 -2.2274979E+01
 -2.2231804E+01 -2.2188726E+01 -2.2145744E+01 -2.2102861E+01
 -2.2060076E+01 -2.2017385E+01 -2.1974792E+01 -2.1932295E+01
 -2.1889893E+01 -2.1847586E+01 -2.1805374E+01 -2.1763260E+01
 -2.1721239E+01 -2.1679314E+01 -2.1637482E+01 -2.1595743E+01
 -2.1554100E+01 -2.1512550E+01 -2.1471092E+01 -2.1429729E+01
 -2.1388458E+01 -2.1347281E+01 -2.1306196E+01 -2.1265203E+01
 -2.1224302E+01 -2.1183493E+01 -2.1142775E+01 -2.1102148E+01
 -2.1061611E+01 -2.1021168E+01 -2.0980812E+01 -2.0940550E+01
 -2.0900375E+01 -2.0860292E+01 -2.0820297E+01 -2.0780394E+01
 -2.0740578E+01 -2.0700851E+01 -2.0661213E+01 -2.0621664E+01
 -2.0582203E+01 -2.0542830E+01 -2.0503546E+01 -2.0464348E+01
 -2.0425238E+01 -2.0386213E+01 -2.0347279E+01 -2.0308430E+01
 -2.0269667E+01 -2.0230989E+01 -2.0192400E+01 -2.0153894E+01
 -2.0115477E+01 -2.0077143E+01 -2.0038895E+01 -2.0000731E+01
 -1.9962652E+01 -1.9924660E+01 -1.9886749E+01 -1.9848925E+01
 -1.9811182E+01 -1.9773525E+01 -1.9735950E+01 -1.9698460E+01
 -1.9661051E+01 -1.9623726E+01 -1.9586483E+01 -1.9549322E+01
 -1.9512245E+01 -1.9475248E+01 -1.9438335E+01 -1.9401503E+01
 -1.9364752E+01 -1.9328081E+01 -1.9291492E+01 -1.9254986E+01
 -1.9218557E+01 -1.9182211E+01 -1.9145943E+01 -1.9109756E+01
 -1.9073648E+01 -1.9037621E+01 -1.9001673E+01 -1.8965803E+01
 -1.8930014E+01 -1.8894302E+01 -1.8858669E+01 -1.8823114E+01
 -1.8787640E+01 -1.8752241E+01 -1.8716921E+01 -1.8681677E+01
 -1.8646511E+01 -1.8611423E+01 -1.8576412E+01 -1.8541477E+01
 -1.8506620E+01 -1.8471840E+01 -1.8437134E+01 -1.8402504E+01
 -1.8367950E+01 -1.8333473E+01 -1.8299070E+01 -1.8264744E+01
 -1.8230494E+01 -1.8196316E+01 -1.8162214E+01 -1.8128185E+01
 -1.8094233E+01 -1.8060354E+01 -1.8026548E+01 -1.7992819E+01
 -1.7959160E+01 -1.7925575E+01 -1.7892065E+01 -1.7858627E+01
 -1.7825262E+01 -1.7791969E+01 -1.7758751E+01 -1.7725601E+01
 -1.7692528E+01 -1.7659525E+01 -1.7626593E+01 -1.7593733E+01
 -1.7560944E+01 -1.7528227E+01 -1.7495581E+01 -1.7463005E+01
 -1.7430502E+01 -1.7398067E+01 -1.7365704E+01 -1.7333410E+01
 -1.7301188E+01 -1.7269033E+01 -1.7236950E+01 -1.7204935E+01
 -1.7172991E+01 -1.7141115E+01 -1.7109308E+01 -1.7077572E+01
 -1.7045902E+01 -1.7014301E+01 -1.6982769E+01 -1.6951305E+01
 -1.6919909E+01 -1.6888580E+01 -1.6857321E+01 -1.6826126E+01
 -1.6795000E+01 -1.6763943E+01 -1.6732950E+01 -1.6702026E+01
 -1.6671167E+01 -1.6640375E+01 -1.6609650E+01 -1.6578991E+01
 -1.6548397E+01 -1.6517870E+01 -1.6487410E+01 -1.6457012E+01
 -1.6426682E+01 -1.6396416E+01 -1.6366215E+01 -1.6336081E+01
 -1.6306009E+01 -1.6276003E+01 -1.6246059E+01 -1.6216183E+01
 -1.6186369E+01 -1.6156618E+01 -1.6126932E+01 -1.6097309E+01
 -1.6067753E+01 -1.6038256E+01 -1.6008823E+01 -1.5979454E+01
 -1.5950147E+01 -1.5920903E+01 -1.5891722E+01 -1.5862603E+01
 -1.5833546E+01 -1.5804551E+01 -1.5775619E+01 -1.5746747E+01
 -1.5717938E+01 -1.5689190E+01 -1.5660504E+01 -1.5631878E+01
 -1.5603314E+01 -1.5574810E+01 -1.5546367E+01 -1.5517985E+01
 -1.5489663E+01 -1.5461402E+01 -1.5433200E+01 -1.5405059E+01
 -1.5376978E+01 -1.5348956E+01 -1.5320993E+01 -1.5293091E+01
 -1.5265247E+01 -1.5237463E+01 -1.5209737E+01 -1.5182070E+01
 -1.5154463E+01 -1.5126913E+01 -1.5099422E+01 -1.5071989E+01
 -1.5044615E+01 -1.5017298E+01 -1.4990040E+01 -1.4962839E+01
 -1.4935695E+01 -1.4908609E+01 -1.4881580E+01 -1.4854609E+01
 -1.4827694E+01 -1.4800836E+01 -1.4774035E+01 -1.4747291E+01
 -1.4720603E+01 -1.4693972E+01 -1.4667396E+01 -1.4640877E+01
 -1.4614414E+01 -1.4588006E+01 -1.4561654E+01 -1.4535358E+01
 -1.4509117E+01 -1.4482931E+01 -1.4456800E+01 -1.4430724E+01
 -1.4404704E+01 -1.4378737E+01 -1.4352826E+01 -1.4326969E+01
 -1.4301166E+01 -1.4275418E+01 -1.4249723E+01 -1.4224083E+01
 -1.4198496E+01 -1.4172963E+01 -1.4147483E+01 -1.4122057E+01
 -1.4096685E+01 -1.4071365E+01 -1.4046098E+01 -1.4020885E+01
 -1.3995724E+01 -1.3970616E+01 -1.3945560E+01 -1.3920557E+01
 -1.3895606E+01 -1.3870707E+01 -1.3845860E+01 -1.3821066E+01
 -1.3796322E+01 -1.3771631E+01 -1.3746991E+01 -1.3722403E+01
 -1.3697866E+01 -1.3673380E+01 -1.3648945E+01 -1.3624561E+01
 -1.3600228E+01 -1.3575945E+01 -1.3551713E+01 -1.3527532E+01
 -1.3503400E+01 -1.3479319E+01 -1.3455289E+01 -1.3431308E+01
 -1.3407377E+01 -1.3383495E+01 -1.3359664E+01 -1.3335881E+01
 -1.3312149E+01 -1.3288465E+01 -1.3264831E+01 -1.3241245E+01
 -1.3217709E+01 -1.3194221E+01 -1.3170782E+01 -1.3147391E+01
 -1.3124049E+01 -1.3100756E+01 -1.3077510E+01 -1.3054313E+01
 -1.3031164E+01 -1.3008062E+01 -1.2985008E+01 -1.2962002E+01
 -1.2939044E+01 -1.2916133E+01 -1.2893269E+01 -1.2870452E+01
 -1.2847683E+01 -1.2824960E+01 -1.2802285E+01 -1.2779656E+01
 -1.2757074E+01 -1.2734538E+01 -1.2712049E+01 -1.2689606E+01
 -1.2667209E+01 -1.2644859E+01 -1.2622554E+01 -1.2600295E+01
 -1.2578082E+01 -1.2555915E+01 -1.2533793E+01 -1.2511717E+01
 -1.2489686E+01 -1.2467700E+01 -1.2445760E+01 -1.2423864E+01
 -1.2402014E+01 -1.2380208E+01 -1.2358447E+01 -1.2336731E+01
 -1.2315059E+01 -1.2293431E+01 -1.2271848E+01 -1.2250309E+01
 -1.2228814E+01 -1.2207363E+01 -1.2185956E+01 -1.2164593E+01
 -1.2143273E+01 -1.2121998E+01 -1.2100765E+01 -1.2079576E+01
 -1.2058430E+01 -1.2037327E+01 -1.2016268E+01 -1.1995251E+01
 -1.1974277E+01 -1.1953346E+01 -1.1932458E+01 -1.1911612E+01
 -1.1890809E+01 -1.1870048E+01 -1.1849329E+01 -1.1828653E+01
 -1.1808019E+01 -1.1787426E+01 -1.1766876E+01 -1.1746367E+01
 -1.1725900E+01 -1.1705475E+01 -1.1685091E+01 -1.1664748E+01
 -1.1644447E+01 -1.1624187E+01 -1.1603968E+01 -1.1583790E+01
 -1.1563653E+01 -1.1543557E+01 -1.1523502E+01 -1.1503487E+01
 -1.1483513E+01 -1.1463579E+01 -1.1443685E+01 -1.1423832E+01
 -1.1404019E+01 -1.1384246E+01 -1.1364514E+01 -1.1344821E+01
 -1.1325167E+01 -1.1305554E+01 -1.1285980E+01 -1.1266446E+01
 -1.1246951E+01 -1.1227495E+01 -1.1208079E+01 -1.1188702E+01
 -1.1169363E+01 -1.1150064E+01 -1.1130804E+01 -1.1111583E+01
 -1.1092400E+01 -1.1073256E+01 -1.1054150E+01 -1.1035083E+01
 -1.1016055E+01 -1.0997064E+01 -1.0978112E+01 -1.0959198E+01
 -1.0940321E+01 -1.0921483E+01 -1.0902683E+01 -1.0883920E+01
 -1.0865195E+01 -1.0846508E+01 -1.0827858E+01 -1.0809245E+01
 -1.0790670E+01 -1.0772132E+01 -1.0753631E+01 -1.0735167E+01
 -1.0716740E+01 -1.0698350E+01 -1.0679997E+01 -1.0661681E+01
 -1.0643401E+01 -1.0625158E+01 -1.0606951E+01 -1.0588781E+01
 -1.0570647E+01 -1.0552549E+01 -1.0534487E+01 -1.0516462E+01
 -1.0498472E+01 -1.0480518E+01 -1.0462600E+01 -1.0444718E+01
 -1.0426871E+01 -1.0409060E+01 -1.0391285E+01 -1.0373545E+01
 -1.0355840E+01 -1.0338170E+01 -1.0320536E+01 -1.0302937E+01
 -1.0285372E+01 -1.0267843E+01 -1.0250348E+01 -1.0232888E+01
 -1.0215463E+01 -1.0198073E+01 -1.0180717E+01 -1.0163395E+01
 -1.0146108E+01 -1.0128855E+01 -1.0111637E+01 -1.0094452E+01
 -1.0077302E+01 -1.0060186E+01 -1.0043103E+01 -1.0026054E+01
 -1.0009039E+01 -9.9920578E+00 -9.9751101E+00 -9.9581966E+00
 -9.9413157E+00 -9.9244680E+00 -9.9076548E+00 -9.8908739E+00
 -9.8741255E+00 -9.8574114E+00 -9.8407297E+00 -9.8240814E+00
 -9.8074656E+00 -9.7908821E+00 -9.7743320E+00 -9.7578144E+00
 -9.7413292E+00 -9.7248764E+00 -9.7084560E+00 -9.6920691E+00
 -9.6757126E+00 -9.6593895E+00 -9.6430979E+00 -9.6268387E+00
 -9.6106119E+00 -9.5944166E+00 -9.5782528E+00 -9.5621214E+00
 -9.5460205E+00 -9.5299520E+00 -9.5139151E+00 -9.4979095E+00
 -9.4819355E+00 -9.4659929E+00 -9.4500818E+00 -9.4342012E+00
 -9.4183521E+00 -9.4025345E+00 -9.3867474E+00 -9.3709908E+00
 -9.3552656E+00 -9.3395710E+00 -9.3239069E+00 -9.3082743E+00
 -9.2926712E+00 -9.2770996E+00 -9.2615576E+00 -9.2460461E+00
 -9.2305651E+00 -9.2151146E+00 -9.1996937E+00 -9.1843033E+00
 -9.1689425E+00 -9.1536121E+00 -9.1383114E+00 -9.1230412E+00
 -9.1077995E+00 -9.0925884E+00 -9.0774069E+00 -9.0622549E+00
 -9.0471315E+00 -9.0320387E+00 -9.0169744E+00 -9.0019398E+00
 -8.9869347E+00 -8.9719591E+00 -8.9570122E+00 -8.9420938E+00
 -8.9272051E+00 -8.9123449E+00 -8.8975134E+00 -8.8827105E+00
 -8.8679371E+00 -8.8531923E+00 -8.8384752E+00 -8.8237877E+00
 -8.8091278E+00 -8.7944975E+00 -8.7798948E+00 -8.7653198E+00
 -8.7507734E+00 -8.7362556E+00 -8.7217655E+00 -8.7073040E+00
 -8.6928701E+00 -8.6784639E+00 -8.6640854E+00 -8.6497345E+00
 -8.6354122E+00 -8.6211166E+00 -8.6068497E+00 -8.5926094E+00
 -8.5783978E+00 -8.5642118E+00 -8.5500546E+00 -8.5359240E+00
 -8.5218210E+00 -8.5077448E+00 -8.4936962E+00 -8.4796743E+00
 -8.4656801E+00 -8.4517117E+00 -8.4377708E+00 -8.4238567E+00
 -8.4099693E+00 -8.3961086E+00 -8.3822746E+00 -8.3684673E+00
 -8.3546867E+00 -8.3409319E+00 -8.3272038E+00 -8.3135023E+00
 -8.2998266E+00 -8.2861776E+00 -8.2725544E+00 -8.2589579E+00
 -8.2453871E+00 -8.2318420E+00 -8.2183237E+00 -8.2048302E+00
 -8.1913633E+00 -8.1779222E+00 -8.1645060E+00 -8.1511164E+00
 -8.1377525E+00 -8.1244135E+00 -8.1111002E+00 -8.0978127E+00
 -8.0845499E+00 -8.0713129E+00 -8.0581007E+00 -8.0449142E+00
 -8.0317535E+00 -8.0186167E+00 -8.0055056E+00 -7.9924192E+00
 -7.9793582E+00 -7.9663215E+00 -7.9533100E+00 -7.9403234E+00
 -7.9273615E+00 -7.9144239E+00 -7.9015112E+00 -7.8886232E+00
 -7.8757596E+00 -7.8629203E+00 -7.8501053E+00 -7.8373151E+00
 -7.8245492E+00 -7.8118072E+00 -7.7990894E+00 -7.7863960E+00
 -7.7737265E+00 -7.7610812E+00 -7.7484598E+00 -7.7358627E+00
 -7.7232890E+00 -7.7107396E+00 -7.6982136E+00 -7.6857114E+00
 -7.6732330E+00 -7.6607780E+00 -7.6483469E+00 -7.6359391E+00
 -7.6235547E+00 -7.6111937E+00 -7.5988564E+00 -7.5865421E+00
 -7.5742512E+00 -7.5619836E+00 -7.5497394E+00 -7.5375180E+00
 -7.5253196E+00 -7.5131445E+00 -7.5009923E+00 -7.4888625E+00
 -7.4767561E+00 -7.4646726E+00 -7.4526119E+00 -7.4405737E+00
 -7.4285579E+00 -7.4165654E+00 -7.4045949E+00 -7.3926473E+00
 -7.3807220E+00 -7.3688192E+00 -7.3569388E+00 -7.3450809E+00
 -7.3332453E+00 -7.3214316E+00 -7.3096404E+00 -7.2978711E+00
 -7.2861242E+00 -7.2743988E+00 -7.2626958E+00 -7.2510147E+00
 -7.2393556E+00 -7.2277184E+00 -7.2161031E+00 -7.2045093E+00
 -7.1929374E+00 -7.1813869E+00 -7.1698585E+00 -7.1583514E+00
 -7.1468658E+00 -7.1354017E+00 -7.1239591E+00 -7.1125383E+00
 -7.1011381E+00 -7.0897598E+00 -7.0784025E+00 -7.0670667E+00
 -7.0557518E+00 -7.0444579E+00 -7.0331855E+00 -7.0219340E+00
 -7.0107031E+00 -6.9994936E+00 -6.9883046E+00 -6.9771371E+00
 -6.9659896E+00 -6.9548635E+00 -6.9437580E+00 -6.9326730E+00
 -6.9216089E+00 -6.9105654E+00 -6.8995423E+00 -6.8885393E+00
 -6.8775573E+00 -6.8665957E+00 -6.8556542E+00 -6.8447332E+00
 -6.8338327E+00 -6.8229523E+00 -6.8120918E+00 -6.8012519E+00
 -6.7904320E+00 -6.7796321E+00 -6.7688522E+00 -6.7580924E+00
 -6.7473526E+00 -6.7366323E+00 -6.7259321E+00 -6.7152519E+00
 -6.7045913E+00 -6.6939507E+00 -6.6833296E+00 -6.6727281E+00
 -6.6621461E+00 -6.6515837E+00 -6.6410413E+00 -6.6305180E+00
 -6.6200142E+00 -6.6095300E+00 -6.5990648E+00 -6.5886192E+00
 -6.5781927E+00 -6.5677853E+00 -6.5573974E+00 -6.5470290E+00
 -6.5366793E+00 -6.5263486E+00 -6.5160370E+00 -6.5057445E+00
 -6.4954710E+00 -6.4852161E+00 -6.4749804E+00 -6.4647636E+00
 -6.4545655E+00 -6.4443860E+00 -6.4342256E+00 -6.4240832E+00
 -6.4139600E+00 -6.4038553E+00 -6.3937693E+00 -6.3837018E+00
 -6.3736525E+00 -6.3636217E+00 -6.3536096E+00 -6.3436160E+00
 -6.3336401E+00 -6.3236828E+00 -6.3137441E+00 -6.3038230E+00
 -6.2939205E+00 -6.2840362E+00 -6.2741699E+00 -6.2643218E+00
 -6.2544913E+00 -6.2446790E+00 -6.2348847E+00 -6.2251086E+00
 -6.2153497E+00 -6.2056093E+00 -6.1958866E+00 -6.1861811E+00
 -6.1764941E+00 -6.1668243E+00 -6.1571722E+00 -6.1475382E+00
 -6.1379213E+00 -6.1283221E+00 -6.1187401E+00 -6.1091757E+00
 -6.0996289E+00 -6.0900998E+00 -6.0805874E+00 -6.0710931E+00
 -6.0616155E+00 -6.0521550E+00 -6.0427122E+00 -6.0332866E+00
 -6.0238781E+00 -6.0144863E+00 -6.0051117E+00 -5.9957547E+00
 -5.9864140E+00 -5.9770908E+00 -5.9677844E+00 -5.9584947E+00
 -5.9492221E+00 -5.9399662E+00 -5.9307270E+00 -5.9215045E+00
 -5.9122992E+00 -5.9031100E+00 -5.8939376E+00 -5.8847823E+00
 -5.8756433E+00 -5.8665209E+00 -5.8574147E+00 -5.8483253E+00
 -5.8392520E+00 -5.8301954E+00 -5.8211551E+00 -5.8121314E+00
 -5.8031240E+00 -5.7941327E+00 -5.7851577E+00 -5.7761989E+00
 -5.7672563E+00 -5.7583294E+00 -5.7494192E+00 -5.7405248E+00
 -5.7316465E+00 -5.7227845E+00 -5.7139382E+00 -5.7051082E+00
 -5.6962938E+00 -5.6874952E+00 -5.6787124E+00 -5.6699457E+00
 -5.6611948E+00 -5.6524591E+00 -5.6437397E+00 -5.6350360E+00
 -5.6263475E+00 -5.6176748E+00 -5.6090178E+00 -5.6003766E+00
 -5.5917506E+00 -5.5831404E+00 -5.5745454E+00 -5.5659657E+00
 -5.5574017E+00 -5.5488529E+00 -5.5403194E+00 -5.5318012E+00
 -5.5232987E+00 -5.5148110E+00 -5.5063386E+00 -5.4978814E+00
 -5.4894395E+00 -5.4810123E+00 -5.4726005E+00 -5.4642038E+00
 -5.4558220E+00 -5.4474554E+00 -5.4391036E+00 -5.4307666E+00
 -5.4224448E+00 -5.4141378E+00 -5.4058452E+00 -5.3975682E+00
 -5.3893056E+00 -5.3810573E+00 -5.3728242E+00 -5.3646059E+00
 -5.3564019E+00 -5.3482127E+00 -5.3400383E+00 -5.3318782E+00
 -5.3237329E+00 -5.3156018E+00 -5.3074856E+00 -5.2993836E+00
 -5.2912960E+00 -5.2832227E+00 -5.2751641E+00 -5.2671194E+00
 -5.2590895E+00 -5.2510734E+00 -5.2430720E+00 -5.2350845E+00
 -5.2271109E+00 -5.2191520E+00 -5.2112069E+00 -5.2032762E+00
 -5.1953597E+00 -5.1874571E+00 -5.1795683E+00 -5.1716938E+00
 -5.1638327E+00 -5.1559863E+00 -5.1481533E+00 -5.1403341E+00
 -5.1325293E+00 -5.1247377E+00 -5.1169605E+00 -5.1091967E+00
 -5.1014466E+00 -5.0937104E+00 -5.0859876E+00 -5.0782785E+00
 -5.0705833E+00 -5.0629015E+00 -5.0552335E+00 -5.0475788E+00
 -5.0399375E+00 -5.0323100E+00 -5.0246959E+00 -5.0170951E+00
 -5.0095081E+00 -5.0019341E+00 -4.9943733E+00 -4.9868264E+00
 -4.9792924E+00 -4.9717717E+00 -4.9642644E+00 -4.9567704E+00
 -4.9492893E+00 -4.9418216E+00 -4.9343667E+00 -4.9269252E+00
 -4.9194965E+00 -4.9120812E+00 -4.9046788E+00 -4.8972898E+00
 -4.8899131E+00 -4.8825498E+00 -4.8751993E+00 -4.8678617E+00
 -4.8605371E+00 -4.8532252E+00 -4.8459263E+00 -4.8386402E+00
 -4.8313665E+00 -4.8241062E+00 -4.8168583E+00 -4.8096228E+00
 -4.8024001E+00 -4.7951903E+00 -4.7879930E+00 -4.7808084E+00
 -4.7736363E+00 -4.7664766E+00 -4.7593298E+00 -4.7521954E+00
 -4.7450733E+00 -4.7379637E+00 -4.7308664E+00 -4.7237816E+00
 -4.7167091E+00 -4.7096491E+00 -4.7026014E+00 -4.6955657E+00
 -4.6885428E+00 -4.6815319E+00 -4.6745334E+00 -4.6675467E+00
 -4.6605725E+00 -4.6536102E+00 -4.6466603E+00 -4.6397223E+00
 -4.6327968E+00 -4.6258826E+00 -4.6189809E+00 -4.6120915E+00
 -4.6052136E+00 -4.5983477E+00 -4.5914941E+00 -4.5846519E+00
 -4.5778222E+00 -4.5710039E+00 -4.5641975E+00 -4.5574031E+00
 -4.5506206E+00 -4.5438495E+00 -4.5370903E+00 -4.5303431E+00
 -4.5236073E+00 -4.5168834E+00 -4.5101709E+00 -4.5034699E+00
 -4.4967809E+00 -4.4901032E+00 -4.4834375E+00 -4.4767828E+00
 -4.4701400E+00 -4.4635086E+00 -4.4568887E+00 -4.4502802E+00
 -4.4436831E+00 -4.4370971E+00 -4.4305229E+00 -4.4239602E+00
 -4.4174085E+00 -4.4108682E+00 -4.4043393E+00 -4.3978214E+00
 -4.3913150E+00 -4.3848200E+00 -4.3783360E+00 -4.3718629E+00
 -4.3654013E+00 -4.3589506E+00 -4.3525114E+00 -4.3460832E+00
 -4.3396659E+00 -4.3332596E+00 -4.3268642E+00 -4.3204803E+00
 -4.3141069E+00 -4.3077450E+00 -4.3013935E+00 -4.2950535E+00
 -4.2887239E+00 -4.2824054E+00 -4.2760978E+00 -4.2698007E+00
 -4.2635145E+00 -4.2572393E+00 -4.2509751E+00 -4.2447214E+00
 -4.2384782E+00 -4.2322459E+00 -4.2260242E+00 -4.2198133E+00
 -4.2136130E+00 -4.2074232E+00 -4.2012444E+00 -4.1950760E+00
 -4.1889181E+00 -4.1827707E+00 -4.1766338E+00 -4.1705074E+00
 -4.1643915E+00 -4.1582861E+00 -4.1521912E+00 -4.1461067E+00
 -4.1400323E+00 -4.1339688E+00 -4.1279154E+00 -4.1218724E+00
 -4.1158395E+00 -4.1098170E+00 -4.1038051E+00 -4.0978031E+00
 -4.0918112E+00 -4.0858297E+00 -4.0798588E+00 -4.0738974E+00
 -4.0679469E+00 -4.0620060E+00 -4.0560751E+00 -4.0501547E+00
 -4.0442443E+00 -4.0383439E+00 -4.0324535E+00 -4.0265732E+00
 -4.0207028E+00 -4.0148425E+00 -4.0089922E+00 -4.0031514E+00
 -3.9973209E+00 -3.9915004E+00 -3.9856896E+00 -3.9798887E+00
 -3.9740977E+00 -3.9683163E+00 -3.9625452E+00 -3.9567833E+00
 -3.9510317E+00 -3.9452896E+00 -3.9395573E+00 -3.9338346E+00
 -3.9281216E+00 -3.9224184E+00 -3.9167247E+00 -3.9110408E+00
 -3.9053664E+00 -3.8997016E+00 -3.8940465E+00 -3.8884010E+00
 -3.8827648E+00 -3.8771384E+00 -3.8715215E+00 -3.8659139E+00
 -3.8603158E+00 -3.8547273E+00 -3.8491480E+00 -3.8435783E+00
 -3.8380179E+00 -3.8324671E+00 -3.8269255E+00 -3.8213933E+00
 -3.8158703E+00 -3.8103569E+00 -3.8048525E+00 -3.7993574E+00
 -3.7938716E+00 -3.7883952E+00 -3.7829278E+00 -3.7774696E+00
 -3.7720208E+00 -3.7665811E+00 -3.7611504E+00 -3.7557290E+00
 -3.7503166E+00 -3.7449133E+00 -3.7395191E+00 -3.7341340E+00
 -3.7287579E+00 -3.7233908E+00 -3.7180328E+00 -3.7126839E+00
 -3.7073438E+00 -3.7020125E+00 -3.6966903E+00 -3.6913772E+00
 -3.6860728E+00 -3.6807773E+00 -3.6754909E+00 -3.6702130E+00
 -3.6649442E+00 -3.6596842E+00 -3.6544330E+00 -3.6491904E+00
 -3.6439569E+00 -3.6387317E+00 -3.6335156E+00 -3.6283083E+00
 -3.6231093E+00 -3.6179192E+00 -3.6127379E+00 -3.6075652E+00
 -3.6024010E+00 -3.5972455E+00 -3.5920987E+00 -3.5869603E+00
 -3.5818305E+00 -3.5767095E+00 -3.5715969E+00 -3.5664928E+00
 -3.5613971E+00 -3.5563099E+00 -3.5512314E+00 -3.5461612E+00
 -3.5410995E+00 -3.5360463E+00 -3.5310013E+00 -3.5259647E+00
 -3.5209367E+00 -3.5159171E+00 -3.5109055E+00 -3.5059025E+00
 -3.5009079E+00 -3.4959214E+00 -3.4909432E+00 -3.4859731E+00
 -3.4810116E+00 -3.4760582E+00 -3.4711130E+00 -3.4661760E+00
 -3.4612472E+00 -3.4563265E+00 -3.4514141E+00 -3.4465098E+00
 -3.4416137E+00 -3.4367256E+00 -3.4318454E+00 -3.4269736E+00
 -3.4221098E+00 -3.4172540E+00 -3.4124062E+00 -3.4075665E+00
 -3.4027350E+00 -3.3979111E+00 -3.3930955E+00 -3.3882875E+00
 -3.3834877E+00 -3.3786960E+00 -3.3739119E+00 -3.3691359E+00
 -3.3643675E+00 -3.3596072E+00 -3.3548548E+00 -3.3501101E+00
 -3.3453734E+00 -3.3406444E+00 -3.3359232E+00 -3.3312097E+00
 -3.3265040E+00 -3.3218062E+00 -3.3171160E+00 -3.3124335E+00
 -3.3077588E+00 -3.3030918E+00 -3.2984324E+00 -3.2937808E+00
 -3.2891366E+00 -3.2845004E+00 -3.2798715E+00 -3.2752504E+00
 -3.2706368E+00 -3.2660308E+00 -3.2614324E+00 -3.2568414E+00
 -3.2522583E+00 -3.2476823E+00 -3.2431140E+00 -3.2385533E+00
 -3.2340000E+00 -3.2294540E+00 -3.2249157E+00 -3.2203846E+00
 -3.2158611E+00 -3.2113450E+00 -3.2068362E+00 -3.2023349E+00
 -3.1978409E+00 -3.1933544E+00 -3.1888752E+00 -3.1844032E+00
 -3.1799386E+00 -3.1754811E+00 -3.1710310E+00 -3.1665883E+00
 -3.1621528E+00 -3.1577246E+00 -3.1533034E+00 -3.1488898E+00
 -3.1444831E+00 -3.1400838E+00 -3.1356914E+00 -3.1313064E+00
 -3.1269286E+00 -3.1225576E+00 -3.1181941E+00 -3.1138375E+00
 -3.1094880E+00 -3.1051457E+00 -3.1008103E+00 -3.0964823E+00
 -3.0921609E+00 -3.0878470E+00 -3.0835397E+00 -3.0792396E+00
 -3.0749464E+00 -3.0706604E+00 -3.0663812E+00 -3.0621090E+00
 -3.0578437E+00 -3.0535853E+00 -3.0493340E+00 -3.0450895E+00
 -3.0408518E+00 -3.0366211E+00 -3.0323973E+00 -3.0281801E+00
 -3.0239699E+00 -3.0197666E+00 -3.0155702E+00 -3.0113802E+00
 -3.0071974E+00 -3.0030212E+00 -2.9988518E+00 -2.9946890E+00
 -2.9905331E+00 -2.9863839E+00 -2.9822414E+00 -2.9781058E+00
 -2.9739766E+00 -2.9698541E+00 -2.9657385E+00 -2.9616294E+00
 -2.9575269E+00 -2.9534311E+00 -2.9493420E+00 -2.9452593E+00
 -2.9411833E+00 -2.9371138E+00 -2.9330511E+00 -2.9289947E+00
 -2.9249449E+00 -2.9209018E+00 -2.9168649E+00 -2.9128346E+00
 -2.9088111E+00 -2.9047937E+00 -2.9007831E+00 -2.8967786E+00
 -2.8927808E+00 -2.8887894E+00 -2.8848045E+00 -2.8808260E+00
 -2.8768537E+00 -2.8728878E+00 -2.8689284E+00 -2.8649755E+00
 -2.8610287E+00 -2.8570883E+00 -2.8531542E+00 -2.8492267E+00
 -2.8453052E+00 -2.8413901E+00 -2.8374813E+00 -2.8335786E+00
 -2.8296826E+00 -2.8257923E+00 -2.8219087E+00 -2.8180311E+00
 -2.8141596E+00 -2.8102944E+00 -2.8064356E+00 -2.8025827E+00
 -2.7987361E+00 -2.7948956E+00 -2.7910614E+00 -2.7872331E+00
 -2.7834110E+00 -2.7795951E+00 -2.7757852E+00 -2.7719817E+00
 -2.7681839E+00 -2.7643924E+00 -2.7606068E+00 -2.7568274E+00
 -2.7530539E+00 -2.7492864E+00 -2.7455249E+00 -2.7417696E+00
 -2.7380202E+00 -2.7342768E+00 -2.7305391E+00 -2.7268076E+00
 -2.7230821E+00 -2.7193625E+00 -2.7156489E+00 -2.7119410E+00
 -2.7082391E+00 -2.7045431E+00 -2.7008531E+00 -2.6971686E+00
 -2.6934905E+00 -2.6898179E+00 -2.6861513E+00 -2.6824903E+00
 -2.6788354E+00 -2.6751862E+00 -2.6715426E+00 -2.6679051E+00
 -2.6642730E+00 -2.6606469E+00 -2.6570268E+00 -2.6534121E+00
 -2.6498034E+00 -2.6462002E+00 -2.6426027E+00 -2.6390109E+00
 -2.6354251E+00 -2.6318445E+00 -2.6282699E+00 -2.6247010E+00
 -2.6211376E+00 -2.6175799E+00 -2.6140280E+00 -2.6104815E+00
 -2.6069405E+00 -2.6034052E+00 -2.5998757E+00 -2.5963516E+00
 -2.5928333E+00 -2.5893202E+00 -2.5858128E+00 -2.5823109E+00
 -2.5788147E+00 -2.5753238E+00 -2.5718386E+00 -2.5683589E+00
 -2.5648847E+00 -2.5614159E+00 -2.5579524E+00 -2.5544946E+00
 -2.5510423E+00 -2.5475953E+00 -2.5441537E+00 -2.5407176E+00
 -2.5372870E+00 -2.5338616E+00 -2.5304418E+00 -2.5270271E+00
 -2.5236180E+00 -2.5202143E+00 -2.5168159E+00 -2.5134227E+00
 -2.5100350E+00 -2.5066526E+00 -2.5032754E+00 -2.4999037E+00
 -2.4965372E+00 -2.4931760E+00 -2.4898200E+00 -2.4864695E+00
 -2.4831240E+00 -2.4797840E+00 -2.4764490E+00 -2.4731193E+00
 -2.4697950E+00 -2.4664755E+00 -2.4631617E+00 -2.4598527E+00
 -2.4565492E+00 -2.4532506E+00 -2.4499574E+00 -2.4466691E+00
 -2.4433861E+00 -2.4401083E+00 -2.4368353E+00 -2.4335678E+00
 -2.4303052E+00 -2.4270480E+00 -2.4237957E+00 -2.4205482E+00
 -2.4173062E+00 -2.4140689E+00 -2.4108369E+00 -2.4076099E+00
 -2.4043880E+00 -2.4011712E+00 -2.3979592E+00 -2.3947523E+00
 -2.3915503E+00 -2.3883536E+00 -2.3851616E+00 -2.3819747E+00
 -2.3787928E+00 -2.3756156E+00 -2.3724437E+00 -2.3692763E+00
 -2.3661141E+00 -2.3629570E+00 -2.3598046E+00 -2.3566573E+00
 -2.3535147E+00 -2.3503768E+00 -2.3472440E+00 -2.3441162E+00
 -2.3409932E+00 -2.3378749E+00 -2.3347616E+00 -2.3316531E+00
 -2.3285494E+00 -2.3254504E+00 -2.3223565E+00 -2.3192673E+00
 -2.3161826E+00 -2.3131030E+00 -2.3100281E+00 -2.3069580E+00
 -2.3038926E+00 -2.3008318E+00 -2.2977760E+00 -2.2947249E+00
 -2.2916784E+00 -2.2886367E+00 -2.2855997E+00 -2.2825675E+00
 -2.2795398E+00 -2.2765169E+00 -2.2734985E+00 -2.2704849E+00
 -2.2674761E+00 -2.2644718E+00 -2.2614722E+00 -2.2584772E+00
 -2.2554867E+00 -2.2525010E+00 -2.2495198E+00 -2.2465434E+00
 -2.2435715E+00 -2.2406042E+00 -2.2376413E+00 -2.2346830E+00
 -2.2317295E+00 -2.2287805E+00 -2.2258358E+00 -2.2228959E+00
 -2.2199602E+00 -2.2170293E+00 -2.2141030E+00 -2.2111809E+00
 -2.2082634E+00 -2.2053506E+00 -2.2024422E+00 -2.1995380E+00
 -2.1966386E+00 -2.1937435E+00 -2.1908529E+00 -2.1879666E+00
 -2.1850848E+00 -2.1822076E+00 -2.1793346E+00 -2.1764662E+00
 -2.1736021E+00 -2.1707425E+00 -2.1678872E+00 -2.1650362E+00
 -2.1621897E+00 -2.1593475E+00 -2.1565096E+00 -2.1536763E+00
 -2.1508472E+00 -2.1480224E+00 -2.1452017E+00 -2.1423855E+00
 -2.1395738E+00 -2.1367662E+00 -2.1339631E+00 -2.1311641E+00
 -2.1283693E+00 -2.1255791E+00 -2.1227930E+00 -2.1200111E+00
 -2.1172335E+00 -2.1144600E+00 -2.1116910E+00 -2.1089261E+00
 -2.1061654E+00 -2.1034088E+00 -2.1006567E+00 -2.0979085E+00
 -2.0951648E+00 -2.0924251E+00 -2.0896895E+00 -2.0869584E+00
 -2.0842311E+00 -2.0815082E+00 -2.0787892E+00 -2.0760746E+00
 -2.0733640E+00 -2.0706575E+00 -2.0679553E+00 -2.0652571E+00
 -2.0625629E+00 -2.0598729E+00 -2.0571871E+00 -2.0545051E+00
 -2.0518274E+00 -2.0491538E+00 -2.0464840E+00 -2.0438185E+00
 -2.0411570E+00 -2.0384996E+00 -2.0358460E+00 -2.0331967E+00
 -2.0305512E+00 -2.0279100E+00 -2.0252726E+00 -2.0226393E+00
 -2.0200100E+00 -2.0173845E+00 -2.0147631E+00 -2.0121458E+00
 -2.0095322E+00 -2.0069227E+00 -2.0043173E+00 -2.0017157E+00
 -1.9991179E+00 -1.9965242E+00 -1.9939344E+00 -1.9913485E+00
 -1.9887666E+00 -1.9861884E+00 -1.9836143E+00 -1.9810441E+00
 -1.9784776E+00 -1.9759151E+00 -1.9733564E+00 -1.9708017E+00
 -1.9682508E+00 -1.9657037E+00 -1.9631604E+00 -1.9606210E+00
 -1.9580855E+00 -1.9555537E+00 -1.9530258E+00 -1.9505017E+00
 -1.9479814E+00 -1.9454648E+00 -1.9429522E+00 -1.9404433E+00
 -1.9379381E+00 -1.9354368E+00 -1.9329392E+00 -1.9304453E+00
 -1.9279552E+00 -1.9254689E+00 -1.9229863E+00 -1.9205074E+00
 -1.9180323E+00 -1.9155608E+00 -1.9130931E+00 -1.9106292E+00
 -1.9081688E+00 -1.9057122E+00 -1.9032593E+00 -1.9008101E+00
 -1.8983645E+00 -1.8959225E+00 -1.8934844E+00 -1.8910497E+00
 -1.8886189E+00 -1.8861916E+00 -1.8837680E+00 -1.8813480E+00
 -1.8789316E+00 -1.8765188E+00 -1.8741097E+00 -1.8717042E+00
 -1.8693023E+00 -1.8669039E+00 -1.8645092E+00 -1.8621180E+00
 -1.8597305E+00 -1.8573464E+00 -1.8549660E+00 -1.8525891E+00
 -1.8502158E+00 -1.8478460E+00 -1.8454797E+00 -1.8431170E+00
 -1.8407578E+00 -1.8384022E+00 -1.8360500E+00 -1.8337013E+00
 -1.8313562E+00 -1.8290147E+00 -1.8266764E+00 -1.8243418E+00
 -1.8220106E+00 -1.8196830E+00 -1.8173586E+00 -1.8150378E+00
 -1.8127207E+00 -1.8104067E+00 -1.8080963E+00 -1.8057894E+00
 -1.8034858E+00 -1.8011856E+00 -1.7988889E+00 -1.7965956E+00
 -1.7943058E+00 -1.7920192E+00 -1.7897362E+00 -1.7874566E+00
 -1.7851803E+00 -1.7829074E+00 -1.7806377E+00 -1.7783717E+00
 -1.7761089E+00 -1.7738494E+00 -1.7715933E+00 -1.7693406E+00
 -1.7670912E+00 -1.7648451E+00 -1.7626024E+00 -1.7603630E+00
 -1.7581269E+00 -1.7558941E+00 -1.7536647E+00 -1.7514385E+00
 -1.7492156E+00 -1.7469960E+00 -1.7447797E+00 -1.7425667E+00
 -1.7403570E+00 -1.7381505E+00 -1.7359473E+00 -1.7337472E+00
 -1.7315506E+00 -1.7293572E+00 -1.7271670E+00 -1.7249800E+00
 -1.7227962E+00 -1.7206157E+00 -1.7184384E+00 -1.7162642E+00
 -1.7140934E+00 -1.7119257E+00 -1.7097613E+00 -1.7076000E+00
 -1.7054420E+00 -1.7032869E+00 -1.7011352E+00 -1.6989866E+00
 -1.6968412E+00 -1.6946990E+00 -1.6925600E+00 -1.6904238E+00
 -1.6882911E+00 -1.6861615E+00 -1.6840349E+00 -1.6819115E+00
 -1.6797912E+00 -1.6776741E+00 -1.6755600E+00 -1.6734492E+00
 -1.6713413E+00 -1.6692365E+00 -1.6671349E+00 -1.6650363E+00
 -1.6629407E+00 -1.6608484E+00 -1.6587591E+00 -1.6566728E+00
 -1.6545897E+00 -1.6525095E+00 -1.6504323E+00 -1.6483583E+00
 -1.6462873E+00 -1.6442193E+00 -1.6421543E+00 -1.6400924E+00
 -1.6380335E+00 -1.6359776E+00 -1.6339247E+00 -1.6318748E+00
 -1.6298279E+00 -1.6277841E+00 -1.6257432E+00 -1.6237053E+00
 -1.6216702E+00 -1.6196384E+00 -1.6176094E+00 -1.6155834E+00
 -1.6135603E+00 -1.6115402E+00 -1.6095231E+00 -1.6075088E+00
 -1.6054976E+00 -1.6034892E+00 -1.6014838E+00 -1.5994813E+00
 -1.5974818E+00 -1.5954851E+00 -1.5934914E+00 -1.5915006E+00
 -1.5895126E+00 -1.5875276E+00 -1.5855455E+00 -1.5835662E+00
 -1.5815899E+00 -1.5796164E+00 -1.5776457E+00 -1.5756780E+00
 -1.5737131E+00 -1.5717511E+00 -1.5697919E+00 -1.5678356E+00
 -1.5658821E+00 -1.5639313E+00 -1.5619836E+00 -1.5600386E+00
 -1.5580965E+00 -1.5561571E+00 -1.5542206E+00 -1.5522869E+00
 -1.5503560E+00 -1.5484279E+00 -1.5465026E+00 -1.5445801E+00
 -1.5426604E+00 -1.5407434E+00 -1.5388292E+00 -1.5369178E+00
 -1.5350091E+00 -1.5331033E+00 -1.5312003E+00 -1.5292999E+00
 -1.5274023E+00 -1.5255075E+00 -1.5236154E+00 -1.5217260E+00
 -1.5198394E+00 -1.5179555E+00 -1.5160743E+00 -1.5141959E+00
 -1.5123200E+00 -1.5104471E+00 -1.5085768E+00 -1.5067091E+00
 -1.5048442E+00 -1.5029819E+00 -1.5011224E+00 -1.4992656E+00
 -1.4974113E+00 -1.4955598E+00 -1.4937110E+00 -1.4918648E+00
 -1.4900213E+00 -1.4881804E+00 -1.4863422E+00 -1.4845067E+00
 -1.4826738E+00 -1.4808435E+00 -1.4790158E+00 -1.4771909E+00
 -1.4753685E+00 -1.4735487E+00 -1.4717315E+00 -1.4699171E+00
 -1.4681051E+00 -1.4662958E+00 -1.4644891E+00 -1.4626850E+00
 -1.4608835E+00 -1.4590845E+00 -1.4572881E+00 -1.4554944E+00
 -1.4537032E+00 -1.4519145E+00 -1.4501286E+00 -1.4483451E+00
 -1.4465641E+00 -1.4447857E+00 -1.4430099E+00 -1.4412366E+00
 -1.4394659E+00 -1.4376976E+00 -1.4359320E+00 -1.4341689E+00
 -1.4324082E+00 -1.4306502E+00 -1.4288946E+00 -1.4271415E+00
 -1.4253910E+00 -1.4236429E+00 -1.4218973E+00 -1.4201543E+00
 -1.4184138E+00 -1.4166757E+00 -1.4149401E+00 -1.4132071E+00
 -1.4114763E+00 -1.4097482E+00 -1.4080225E+00 -1.4062992E+00
 -1.4045784E+00 -1.4028602E+00 -1.4011443E+00 -1.3994309E+00
 -1.3977199E+00 -1.3960114E+00 -1.3943053E+00 -1.3926016E+00
 -1.3909004E+00 -1.3892016E+00 -1.3875052E+00 -1.3858112E+00
 -1.3841197E+00 -1.3824306E+00 -1.3807437E+00 -1.3790594E+00
 -1.3773775E+00 -1.3756979E+00 -1.3740207E+00 -1.3723460E+00
 -1.3706735E+00 -1.3690035E+00 -1.3673359E+00 -1.3656706E+00
 -1.3640077E+00 -1.3623471E+00 -1.3606889E+00 -1.3590331E+00
 -1.3573796E+00 -1.3557284E+00 -1.3540796E+00 -1.3524332E+00
 -1.3507890E+00 -1.3491472E+00 -1.3475078E+00 -1.3458706E+00
 -1.3442358E+00 -1.3426033E+00 -1.3409731E+00 -1.3393452E+00
 -1.3377196E+00 -1.3360963E+00 -1.3344754E+00 -1.3328567E+00
 -1.3312403E+00 -1.3296262E+00 -1.3280143E+00 -1.3264048E+00
 -1.3247975E+00 -1.3231925E+00 -1.3215898E+00 -1.3199893E+00
 -1.3183911E+00 -1.3167951E+00 -1.3152014E+00 -1.3136100E+00
 -1.3120208E+00 -1.3104337E+00 -1.3088491E+00 -1.3072666E+00
 -1.3056864E+00 -1.3041083E+00 -1.3025326E+00 -1.3009589E+00
 -1.2993876E+00 -1.2978184E+00 -1.2962515E+00 -1.2946867E+00
 -1.2931242E+00 -1.2915639E+00 -1.2900057E+00 -1.2884498E+00
 -1.2868960E+00 -1.2853445E+00 -1.2837951E+00 -1.2822479E+00
 -1.2807029E+00 -1.2791600E+00 -1.2776192E+00 -1.2760808E+00
 -1.2745444E+00 -1.2730103E+00 -1.2714781E+00 -1.2699482E+00
 -1.2684205E+00 -1.2668949E+00 -1.2653714E+00 -1.2638501E+00
 -1.2623309E+00 -1.2608138E+00 -1.2592988E+00 -1.2577860E+00
 -1.2562753E+00 -1.2547667E+00 -1.2532603E+00 -1.2517560E+00
 -1.2502536E+00 -1.2487535E+00 -1.2472554E+00 -1.2457595E+00
  4.3897055E+04  8.7389961E+04  1.3048152E+05  1.7317450E+05
  2.1547166E+05  2.5737572E+05  2.9888944E+05  3.4001547E+05
  3.8075656E+05  4.2111538E+05  4.6109453E+05  5.0069666E+05
  5.3992444E+05  5.7878050E+05  6.1726731E+05  6.5538756E+05
  6.9314375E+05  7.3053850E+05  7.6757425E+05  8.0425350E+05
  8.4057888E+05  8.7655275E+05  9.1217756E+05  9.4745588E+05
  9.8239000E+05  1.0169825E+06  1.0512356E+06  1.0851519E+06
  1.1187336E+06  1.1519832E+06  1.1849029E+06  1.2174952E+06
  1.2497622E+06  1.2817064E+06  1.3133300E+06  1.3446352E+06
  1.3756246E+06  1.4063001E+06  1.4366640E+06  1.4667185E+06
  1.4964659E+06  1.5259084E+06  1.5550480E+06  1.5838871E+06
  1.6124278E+06  1.6406720E+06  1.6686220E+06  1.6962800E+06
  1.7236480E+06  1.7507280E+06  1.7775222E+06  1.8040328E+06
  1.8302614E+06  1.8562104E+06  1.8818818E+06  1.9072772E+06
  1.9323992E+06  1.9572495E+06  1.9818300E+06  2.0061428E+06
  2.0301896E+06  2.0539726E+06  2.0774936E+06  2.1007545E+06
  2.1237572E+06  2.1465038E+06  2.1689958E+06  2.1912352E+06
  2.2132240E+06  2.2349640E+06  2.2564568E+06  2.2777045E+06
  2.2987085E+06  2.3194710E+06  2.3399938E+06  2.3602782E+06
  2.3803265E+06  2.4001402E+06  2.4197210E+06  2.4390705E+06
  2.4581908E+06  2.4770832E+06  2.4957498E+06  2.5141920E+06
  2.5324115E+06  2.5504098E+06  2.5681890E+06  2.5857502E+06
  2.6030955E+06  2.6202262E+06  2.6371440E+06  2.6538508E+06
  2.6703475E+06  2.6866365E+06  2.7027188E+06  2.7185960E+06
  2.7342698E+06  2.7497415E+06  2.7650130E+06  2.7800858E+06
  2.7949610E+06  2.8096405E+06  2.8241255E+06  2.8384175E+06
  2.8525182E+06  2.8664290E+06  2.8801512E+06  2.8936865E+06
  2.9070360E+06  2.9202012E+06  2.9331838E+06  2.9459848E+06
  2.9586058E+06  2.9710482E+06  2.9833135E+06  2.9954028E+06
  3.0073175E+06  3.0190590E+06  3.0306290E+06  3.0420282E+06
  3.0532582E+06  3.0643205E+06  3.0752162E+06  3.0859468E+06
  3.0965132E+06  3.1069172E+06  3.1171595E+06  3.1272420E+06
  3.1371652E+06  3.1469310E+06  3.1565405E+06  3.1659948E+06
  3.1752950E+06  3.1844428E+06  3.1934390E+06  3.2022848E+06
  3.2109815E+06  3.2195300E+06  3.2279322E+06  3.2361885E+06
  3.2443005E+06  3.2522695E+06  3.2600960E+06  3.2677818E+06
  3.2753275E+06  3.2827348E+06  3.2900042E+06  3.2971372E+06
  3.3041350E+06  3.3109982E+06  3.3177285E+06  3.3243265E+06
  3.3307935E+06  3.3371302E+06  3.3433385E+06  3.3494185E+06
  3.3553720E+06  3.3611995E+06  3.3669025E+06  3.3724815E+06
  3.3779380E+06  3.3832725E+06  3.3884865E+06  3.3935808E+06
  3.3985565E+06  3.4034142E+06  3.4081555E+06  3.4127808E+06
  3.4172912E+06  3.4216880E+06  3.4259720E+06  3.4301438E+06
  3.4342045E+06  3.4381555E+06  3.4419970E+06  3.4457305E+06
  3.4493565E+06  3.4528762E+06  3.4562905E+06  3.4596000E+06
  3.4628060E+06  3.4659090E+06  3.4689102E+06  3.4718102E+06
  3.4746100E+06  3.4773105E+06  3.4799125E+06  3.4824170E+06
  3.4848245E+06  3.4871360E+06  3.4893525E+06  3.4914748E+06
  3.4935035E+06  3.4954395E+06  3.4972835E+06  3.4990368E+06
  3.5006995E+06  3.5022730E+06  3.5037578E+06  3.5051548E+06
  3.5064645E+06  3.5076880E+06  3.5088258E+06  3.5098788E+06
  3.5108478E+06  3.5117335E+06  3.5125368E+06  3.5132580E+06
  3.5138982E+06  3.5144582E+06  3.5149385E+06  3.5153400E+06
  3.5156632E+06  3.5159090E+06  3.5160780E+06  3.5161710E+06
  3.5161885E+06  3.5161315E+06  3.5160005E+06  3.5157960E+06
  3.5155190E+06  3.5151700E+06  3.5147500E+06  3.5142590E+06
  3.5136982E+06  3.5130680E+06  3.5123695E+06  3.5116025E+06
  3.5107685E+06  3.5098675E+06  3.5089005E+06  3.5078680E+06
  3.5067708E+06  3.5056092E+06  3.5043840E+06  3.5030960E+06
  3.5017455E+06  3.5003330E+06  3.4988595E+06  3.4973255E+06
  3.4957312E+06  3.4940775E+06  3.4923650E+06  3.4905945E+06
  3.4887660E+06  3.4868802E+06  3.4849382E+06  3.4829400E+06
  3.4808865E+06  3.4787780E+06  3.4766150E+06  3.4743985E+06
  3.4721285E+06  3.4698058E+06  3.4674310E+06  3.4650045E+06
  3.4625268E+06  3.4599985E+06  3.4574202E+06  3.4547922E+06
  3.4521152E+06  3.4493898E+06  3.4466160E+06  3.4437950E+06
  3.4409268E+06  3.4380120E+06  3.4350510E+06  3.4320445E+06
  3.4289930E+06  3.4258968E+06  3.4227562E+06  3.4195722E+06
  3.4163450E+06  3.4130750E+06  3.4097625E+06  3.4064085E+06
  3.4030130E+06  3.3995765E+06  3.3960995E+06  3.3925825E+06
  3.3890260E+06  3.3854305E+06  3.3817960E+06  3.3781232E+06
  3.3744128E+06  3.3706648E+06  3.3668800E+06  3.3630585E+06
  3.3592008E+06  3.3553072E+06  3.3513785E+06  3.3474148E+06
  3.3434165E+06  3.3393842E+06  3.3353180E+06  3.3312188E+06
  3.3270865E+06  3.3229215E+06  3.3187245E+06  3.3144955E+06
  3.3102355E+06  3.3059442E+06  3.3016225E+06  3.2972702E+06
  3.2928882E+06  3.2884768E+06  3.2840360E+06  3.2795665E+06
  3.2750685E+06  3.2705425E+06  3.2659888E+06  3.2614075E+06
  3.2567995E+06  3.2521645E+06  3.2475032E+06  3.2428160E+06
  3.2381032E+06  3.2333650E+06  3.2286020E+06  3.2238140E+06
  3.2190018E+06  3.2141655E+06  3.2093058E+06  3.2044225E+06
  3.1995162E+06  3.1945870E+06  3.1896358E+06  3.1846620E+06
  3.1796668E+06  3.1746500E+06  3.1696120E+06  3.1645530E+06
  3.1594735E+06  3.1543735E+06  3.1492538E+06  3.1441142E+06
  3.1389552E+06  3.1337772E+06  3.1285802E+06  3.1233648E+06
  3.1181310E+06  3.1128792E+06  3.1076100E+06  3.1023230E+06
  3.0970188E+06  3.0916978E+06  3.0863602E+06  3.0810062E+06
  3.0756360E+06  3.0702500E+06  3.0648485E+06  3.0594315E+06
  3.0539995E+06  3.0485528E+06  3.0430915E+06  3.0376158E+06
  3.0321260E+06  3.0266225E+06  3.0211052E+06  3.0155748E+06
  3.0100312E+06  3.0044748E+06  2.9989055E+06  2.9933240E+06
  2.9877305E+06  2.9821250E+06  2.9765075E+06  2.9708788E+06
  2.9652388E+06  2.9595878E+06  2.9539260E+06  2.9482535E+06
  2.9425708E+06  2.9368778E+06  2.9311748E+06  2.9254622E+06
  2.9197400E+06  2.9140085E+06  2.9082680E+06  2.9025185E+06
  2.8967605E+06  2.8909938E+06  2.8852188E+06  2.8794358E+06
  2.8736448E+06  2.8678460E+06  2.8620400E+06  2.8562265E+06
  2.8504060E+06  2.8445785E+06  2.8387440E+06  2.8329032E+06
  2.8270560E+06  2.8212028E+06  2.8153432E+06  2.8094780E+06
  2.8036070E+06  2.7977305E+06  2.7918490E+06  2.7859620E+06
  2.7800702E+06  2.7741735E+06  2.7682725E+06  2.7623668E+06
  2.7564568E+06  2.7505425E+06  2.7446245E+06  2.7387028E+06
  2.7327772E+06  2.7268482E+06  2.7209160E+06  2.7149805E+06
  2.7090420E+06  2.7031005E+06  2.6971565E+06  2.6912100E+06
  2.6852610E+06  2.6793095E+06  2.6733562E+06  2.6674010E+06
  2.6614438E+06  2.6554850E+06  2.6495245E+06  2.6435628E+06
  2.6375998E+06  2.6316355E+06  2.6256705E+06  2.6197045E+06
  2.6137378E+06  2.6077705E+06  2.6018028E+06  2.5958348E+06
  2.5898665E+06  2.5838982E+06  2.5779300E+06  2.5719620E+06
  2.5659942E+06  2.5600270E+06  2.5540602E+06  2.5480942E+06
  2.5421290E+06  2.5361648E+06  2.5302015E+06  2.5242395E+06
  2.5182785E+06  2.5123190E+06  2.5063612E+06  2.5004050E+06
  2.4944502E+06  2.4884975E+06  2.4825468E+06  2.4765980E+06
  2.4706515E+06  2.4647070E+06  2.4587652E+06  2.4528258E+06
  2.4468888E+06  2.4409545E+06  2.4350232E+06  2.4290948E+06
  2.4231690E+06  2.4172465E+06  2.4113272E+06  2.4054112E+06
  2.3994988E+06  2.3935895E+06  2.3876838E+06  2.3817820E+06
  2.3758835E+06  2.3699892E+06  2.3640988E+06  2.3582122E+06
  2.3523298E+06  2.3464518E+06  2.3405778E+06  2.3347082E+06
  2.3288430E+06  2.3229825E+06  2.3171265E+06  2.3112750E+06
  2.3054285E+06  2.2995870E+06  2.2937502E+06  2.2879185E+06
  2.2820918E+06  2.2762702E+06  2.2704540E+06  2.2646430E+06
  2.2588375E+06  2.2530372E+06  2.2472428E+06  2.2414538E+06
  2.2356705E+06  2.2298930E+06  2.2241212E+06  2.2183555E+06
  2.2125955E+06  2.2068418E+06  2.2010940E+06  2.1953522E+06
  2.1896168E+06  2.1838878E+06  2.1781650E+06  2.1724485E+06
  2.1667388E+06  2.1610352E+06  2.1553385E+06  2.1496485E+06
  2.1439650E+06  2.1382885E+06  2.1326185E+06  2.1269558E+06
  2.1212998E+06  2.1156508E+06  2.1100090E+06  2.1043740E+06
  2.0987465E+06  2.0931261E+06  2.0875130E+06  2.0819071E+06
  2.0763088E+06  2.0707178E+06  2.0651342E+06  2.0595582E+06
  2.0539898E+06  2.0484289E+06  2.0428758E+06  2.0373302E+06
  2.0317928E+06  2.0262628E+06  2.0207409E+06  2.0152268E+06
  2.0097206E+06  2.0042225E+06  1.9987324E+06  1.9932502E+06
  1.9877764E+06  1.9823106E+06  1.9768531E+06  1.9714038E+06
  1.9659628E+06  1.9605299E+06  1.9551056E+06  1.9496896E+06
  1.9442820E+06  1.9388830E+06  1.9334924E+06  1.9281104E+06
  1.9227369E+06  1.9173721E+06  1.9120159E+06  1.9066684E+06
  1.9013296E+06  1.8959996E+06  1.8906782E+06  1.8853659E+06
  1.8800622E+06  1.8747676E+06  1.8694818E+06  1.8642049E+06
  1.8589370E+06  1.8536781E+06  1.8484282E+06  1.8431872E+06
  1.8379556E+06  1.8327329E+06  1.8275194E+06  1.8223151E+06
  1.8171199E+06  1.8119340E+06  1.8067572E+06  1.8015898E+06
  1.7964318E+06  1.7912828E+06  1.7861432E+06  1.7810132E+06
  1.7758924E+06  1.7707811E+06  1.7656792E+06  1.7605868E+06
  1.7555038E+06  1.7504301E+06  1.7453661E+06  1.7403116E+06
  1.7352668E+06  1.7302312E+06  1.7252056E+06  1.7201894E+06
  1.7151828E+06  1.7101859E+06  1.7051988E+06  1.7002211E+06
  1.6952532E+06  1.6902951E+06  1.6853466E+06  1.6804079E+06
  1.6754790E+06  1.6705598E+06  1.6656504E+06  1.6607508E+06
  1.6558610E+06  1.6509810E+06  1.6461109E+06  1.6412508E+06
  1.6364002E+06  1.6315598E+06  1.6267291E+06  1.6219084E+06
  1.6170976E+06  1.6122968E+06  1.6075058E+06  1.6027248E+06
  1.5979536E+06  1.5931925E+06  1.5884412E+06  1.5837002E+06
  1.5789690E+06  1.5742479E+06  1.5695368E+06  1.5648356E+06
  1.5601444E+06  1.5554632E+06  1.5507922E+06  1.5461312E+06
  1.5414802E+06  1.5368394E+06  1.5322086E+06  1.5275878E+06
  1.5229771E+06  1.5183765E+06  1.5137859E+06  1.5092055E+06
  1.5046351E+06  1.5000749E+06  1.4955248E+06  1.4909848E+06
  1.4864548E+06  1.4819349E+06  1.4774251E+06  1.4729255E+06
  1.4684361E+06  1.4639568E+06  1.4594874E+06  1.4550282E+06
  1.4505792E+06  1.4461405E+06  1.4417118E+06  1.4372931E+06
  1.4328846E+06  1.4284862E+06  1.4240981E+06  1.4197200E+06
  1.4153520E+06  1.4109942E+06  1.4066465E+06  1.4023089E+06
  1.3979815E+06  1.3936642E+06  1.3893570E+06  1.3850599E+06
  1.3807729E+06  1.3764961E+06  1.3722294E+06  1.3679728E+06
  1.3637262E+06  1.3594899E+06  1.3552636E+06  1.3510475E+06
  1.3468414E+06  1.3426454E+06  1.3384595E+06  1.3342838E+06
  1.3301180E+06  1.3259622E+06  1.3218168E+06  1.3176812E+06
  1.3135558E+06  1.3094404E+06  1.3053351E+06  1.3012398E+06
  1.2971545E+06  1.2930792E+06  1.2890142E+06  1.2849590E+06
  1.2809139E+06  1.2768788E+06  1.2728538E+06  1.2688386E+06
  1.2648335E+06  1.2608384E+06  1.2568532E+06  1.2528780E+06
  1.2489128E+06  1.2449576E+06  1.2410122E+06  1.2370769E+06
  1.2331515E+06  1.2292360E+06  1.2253304E+06  1.2214348E+06
  1.2175489E+06  1.2136731E+06  1.2098071E+06  1.2059509E+06
  1.2021048E+06  1.1982682E+06  1.1944418E+06  1.1906250E+06
  1.1868181E+06  1.1830210E+06  1.1792338E+06  1.1754562E+06
  1.1716886E+06  1.1679308E+06  1.1641826E+06  1.1604442E+06
  1.1567156E+06  1.1529968E+06  1.1492876E+06  1.1455882E+06
  1.1418984E+06  1.1382184E+06  1.1345480E+06  1.1308874E+06
  1.1272362E+06  1.1235950E+06  1.1199632E+06  1.1163411E+06
  1.1127286E+06  1.1091258E+06  1.1055324E+06  1.1019488E+06
  1.0983746E+06  1.0948100E+06  1.0912549E+06  1.0877094E+06
  1.0841734E+06  1.0806469E+06  1.0771299E+06  1.0736224E+06
  1.0701242E+06  1.0666358E+06  1.0631565E+06  1.0596868E+06
  1.0562265E+06  1.0527756E+06  1.0493340E+06  1.0459019E+06
  1.0424791E+06  1.0390657E+06  1.0356615E+06  1.0322668E+06
  1.0288813E+06  1.0255051E+06  1.0221382E+06  1.0187806E+06
  1.0154322E+06  1.0120931E+06  1.0087632E+06  1.0054425E+06
  1.0021309E+06  9.9882862E+05  9.9553544E+05  9.9225144E+05
  9.8897656E+05  9.8571088E+05  9.8245419E+05  9.7920669E+05
  9.7596825E+05  9.7273881E+05  9.6951850E+05  9.6630719E+05
  9.6310488E+05  9.5991162E+05  9.5672731E+05  9.5355200E+05
  9.5038569E+05  9.4722825E+05  9.4407975E+05  9.4094019E+05
  9.3780956E+05  9.3468775E+05  9.3157488E+05  9.2847081E+05
  9.2537556E+05  9.2228919E+05  9.1921156E+05  9.1614275E+05
  9.1308275E+05  9.1003150E+05  9.0698894E+05  9.0395519E+05
  9.0093006E+05  8.9791369E+05  8.9490600E+05  8.9190694E+05
  8.8891650E+05  8.8593475E+05  8.8296162E+05  8.7999706E+05
  8.7704106E+05  8.7409369E+05  8.7115481E+05  8.6822450E+05
  8.6530269E+05  8.6238938E+05  8.5948456E+05  8.5658825E+05
  8.5370038E+05  8.5082088E+05  8.4794988E+05  8.4508725E+05
  8.4223300E+05  8.3938712E+05  8.3654956E+05  8.3372038E+05
  8.3089950E+05  8.2808700E+05  8.2528269E+05  8.2248669E+05
  8.1969894E+05  8.1691944E+05  8.1414812E+05  8.1138506E+05
  8.0863012E+05  8.0588344E+05  8.0314481E+05  8.0041438E+05
  7.9769206E+05  7.9497781E+05  7.9227169E+05  7.8957362E+05
  7.8688362E+05  7.8420162E+05  7.8152769E+05  7.7886169E+05
  7.7620375E+05  7.7355369E+05  7.7091162E+05  7.6827750E+05
  7.6565131E+05  7.6303300E+05  7.6042250E+05  7.5781994E+05
  7.5522525E+05  7.5263831E+05  7.5005925E+05  7.4748794E+05
  7.4492444E+05  7.4236869E+05  7.3982069E+05  7.3728044E+05
  7.3474788E+05  7.3222300E+05  7.2970581E+05  7.2719625E+05
  7.2469438E+05  7.2220006E+05  7.1971344E+05  7.1723438E+05
  7.1476288E+05  7.1229894E+05  7.0984250E+05  7.0739362E+05
  7.0495225E+05  7.0251831E+05  7.0009194E+05  6.9767294E+05
  6.9526138E+05  6.9285725E+05  6.9046056E+05  6.8807125E+05
  6.8568925E+05  6.8331462E+05  6.8094738E+05  6.7858738E+05
  6.7623469E+05  6.7388931E+05  6.7155119E+05  6.6922031E+05
  6.6689662E+05  6.6458019E+05  6.6227094E+05  6.5996888E+05
  6.5767400E+05  6.5538619E+05  6.5310556E+05  6.5083200E+05
  6.4856556E+05  6.4630625E+05  6.4405394E+05  6.4180862E+05
  6.3957044E+05  6.3733919E+05  6.3511494E+05  6.3289762E+05
  6.3068731E+05  6.2848394E+05  6.2628750E+05  6.2409794E+05
  6.2191525E+05  6.1973944E+05  6.1757050E+05  6.1540844E+05
  6.1325312E+05  6.1110462E+05  6.0896294E+05  6.0682800E+05
  6.0469981E+05  6.0257838E+05  6.0046362E+05  5.9835556E+05
  5.9625425E+05  5.9415956E+05  5.9207150E+05  5.8999012E+05
  5.8791538E+05  5.8584719E+05  5.8378556E+05  5.8173056E+05
  5.7968206E+05  5.7764012E+05  5.7560469E+05  5.7357575E+05
  5.7155325E+05  5.6953731E+05  5.6752775E+05  5.6552462E+05
  5.6352794E+05  5.6153769E+05  5.5955375E+05  5.5757619E+05
  5.5560500E+05  5.5364012E+05  5.5168162E+05  5.4972938E+05
  5.4778338E+05  5.4584369E+05  5.4391025E+05  5.4198300E+05
  5.4006206E+05  5.3814725E+05  5.3623862E+05  5.3433619E+05
  5.3243988E+05  5.3054975E+05  5.2866569E+05  5.2678775E+05
  5.2491594E+05  5.2305016E+05  5.2119044E+05  5.1933675E+05
  5.1748909E+05  5.1564744E+05  5.1381178E+05  5.1198209E+05
  5.1015838E+05  5.0834056E+05  5.0652869E+05  5.0472275E+05
  5.0292266E+05  5.0112850E+05  4.9934016E+05  4.9755769E+05
  4.9578103E+05  4.9401019E+05  4.9224516E+05  4.9048588E+05
  4.8873238E+05  4.8698466E+05  4.8524262E+05  4.8350634E+05
  4.8177575E+05  4.8005088E+05  4.7833162E+05  4.7661806E+05
  4.7491012E+05  4.7320781E+05  4.7151112E+05  4.6982003E+05
  4.6813450E+05  4.6645453E+05  4.6478009E+05  4.6311122E+05
  4.6144784E+05  4.5978997E+05  4.5803972E+05  4.5639603E+05
  4.5475981E+05  4.5313109E+05  4.5150981E+05  4.4989600E+05
  4.4828956E+05  4.4669053E+05  4.4509888E+05  4.4351453E+05
  4.4193753E+05  4.4036784E+05  4.3880538E+05  4.3725019E+05
  4.3570222E+05  4.3416147E+05  4.3262788E+05  4.3110144E+05
  4.2958212E+05  4.2806994E+05  4.2656481E+05  4.2506675E+05
  4.2357572E+05  4.2209169E+05  4.2061466E+05  4.1914459E+05
  4.1768144E+05  4.1622519E+05  4.1477584E+05  4.1333334E+05
  4.1189769E+05  4.1046884E+05  4.0904678E+05  4.0763147E+05
  4.0622291E+05  4.0482103E+05  4.0342588E+05  4.0203734E+05
  4.0065547E+05  3.9928019E+05  3.9791150E+05  3.9654938E+05
  3.9519375E+05  3.9384466E+05  3.9250203E+05  3.9116588E+05
  3.8983612E+05  3.8851278E+05  3.8719584E+05  3.8588522E+05
  3.8458094E+05  3.8328294E+05  3.8199122E+05  3.8070575E+05
  3.7942650E+05  3.7815344E+05  3.7688653E+05  3.7562578E+05
  3.7437112E+05  3.7312259E+05  3.7188009E+05  3.7064362E+05
  3.6941316E+05  3.6818869E+05  3.6697016E+05  3.6575759E+05
  3.6455088E+05  3.6335006E+05  3.6215509E+05  3.6096591E+05
  3.5978256E+05  3.5860494E+05  3.5743309E+05  3.5626694E+05
  3.5510647E+05  3.5395162E+05  3.5280247E+05  3.5165888E+05
  3.5052088E+05  3.4938841E+05  3.4826144E+05  3.4714000E+05
  3.4602400E+05  3.4491347E+05  3.4380831E+05  3.4270856E+05
  3.4161416E+05  3.4052509E+05  3.3944131E+05  3.3836281E+05
  3.3728956E+05  3.3622150E+05  3.3515866E+05  3.3410097E+05
  3.3304841E+05  3.3200097E+05  3.3095859E+05  3.2992128E+05
  3.2888897E+05  3.2786166E+05  3.2683934E+05  3.2582194E+05
  3.2480944E+05  3.2380184E+05  3.2279909E+05  3.2180116E+05
  3.2080806E+05  3.1981972E+05  3.1883612E+05  3.1785722E+05
  3.1688303E+05  3.1591347E+05  3.1494859E+05  3.1398828E+05
  3.1303256E+05  3.1208138E+05  3.1113472E+05  3.1019256E+05
  3.0925488E+05  3.0832159E+05  3.0739275E+05  3.0646828E+05
  3.0554816E+05  3.0463238E+05  3.0372088E+05  3.0281362E+05
  3.0191066E+05  3.0101188E+05  3.0011728E+05  2.9922684E+05
  2.9834053E+05  2.9745834E+05  2.9658022E+05  2.9570612E+05
  2.9483606E+05  2.9396997E+05  2.9310788E+05  2.9224966E+05
  2.9139541E+05  2.9054500E+05  2.8969844E+05  2.8885572E+05
  2.8801678E+05  2.8718162E+05  2.8635019E+05  2.8552247E+05
  2.8469844E+05  2.8387806E+05  2.8306131E+05  2.8224816E+05
  2.8143859E+05  2.8063256E+05  2.7983003E+05  2.7903100E+05
  2.7823544E+05  2.7744331E+05  2.7665459E+05  2.7586925E+05
  2.7508728E+05  2.7430859E+05  2.7353325E+05  2.7276112E+05
  2.7199228E+05  2.7122662E+05  2.7046419E+05  2.6970491E+05
  2.6894875E+05  2.6819569E+05  2.6744572E+05  2.6669881E+05
  2.6595491E+05  2.6521400E+05  2.6447609E+05  2.6374112E+05
  2.6300903E+05  2.6227988E+05  2.6155356E+05  2.6083009E+05
  2.6010944E+05  2.5939155E+05  2.5867642E+05  2.5796403E+05
  2.5725434E+05  2.5654731E+05  2.5584295E+05  2.5514122E+05
  2.5444208E+05  2.5374552E+05  2.5305148E+05  2.5235998E+05
  2.5167097E+05  2.5098442E+05  2.5030031E+05  2.4961862E+05
  2.4893931E+05  2.4826238E+05  2.4758777E+05  2.4691547E+05
  2.4624545E+05  2.4557770E+05  2.4491219E+05  2.4424888E+05
  2.4358777E+05  2.4292880E+05  2.4227195E+05  2.4161722E+05
  2.4096456E+05  2.4031397E+05  2.3966541E+05  2.3901884E+05
  2.3837428E+05  2.3773166E+05  2.3709097E+05  2.3645219E+05
  2.3581528E+05  2.3518023E+05  2.3454703E+05  2.3391562E+05
  2.3328600E+05  2.3265814E+05  2.3203202E+05  2.3140759E+05
  2.3078486E+05  2.3016380E+05  2.2954436E+05  2.2892655E+05
  2.2831031E+05  2.2769566E+05  2.2708255E+05  2.2647095E+05
  2.2586084E+05  2.2525222E+05  2.2464505E+05  2.2403930E+05
  2.2343494E+05  2.2283197E+05  2.2223036E+05  2.2163008E+05
  2.2103111E+05  2.2043344E+05  2.1983702E+05  2.1924184E+05
  2.1864791E+05  2.1805516E+05  2.1746356E+05  2.1687316E+05
  2.1628386E+05  2.1569567E+05  2.1510858E+05  2.1452255E+05
  2.1393756E+05  2.1335361E+05  2.1277066E+05  2.1218867E+05
  2.1160764E+05  2.1102756E+05  2.1044839E+05  2.0987011E+05
  2.0929270E+05  2.0871616E+05  2.0814045E+05  2.0756555E+05
  2.0699144E+05  2.0641809E+05  2.0584550E+05  2.0527362E+05
  2.0470248E+05  2.0413202E+05  2.0356223E+05  2.0299309E+05
  2.0242459E+05  2.0185669E+05  2.0128938E+05  2.0072266E+05
  2.0015647E+05  1.9959083E+05  1.9902570E+05  1.9846106E+05
  1.9789692E+05  1.9733323E+05  1.9676997E+05  1.9620714E+05
  1.9564472E+05  1.9508269E+05  1.9452102E+05  1.9395969E+05
  1.9339870E+05  1.9283803E+05  1.9227766E+05  1.9171756E+05
  1.9115773E+05  1.9059814E+05  1.9003878E+05  1.8947964E+05
  1.8892069E+05  1.8836192E+05  1.8780331E+05  1.8724484E+05
  1.8668652E+05  1.8612830E+05  1.8557017E+05  1.8501212E+05
  1.8445416E+05  1.8389622E+05  1.8333833E+05  1.8278045E+05
  1.8222259E+05  1.8166472E+05  1.8110681E+05  1.8054888E+05
  1.7999089E+05  1.7943281E+05  1.7887469E+05  1.7831644E+05
  1.7775808E+05  1.7719959E+05  1.7664098E+05  1.7608220E+05
  1.7552327E+05  1.7496416E+05  1.7440484E+05  1.7384533E+05
  1.7328559E+05  1.7272564E+05  1.7216544E+05  1.7160498E+05
  1.7104425E+05  1.7048323E+05  1.6992194E+05  1.6936034E+05
  1.6879842E+05  1.6823619E+05  1.6767359E+05  1.6711067E+05
  1.6654738E+05  1.6598372E+05  1.6541969E+05  1.6485525E+05
  1.6429042E+05  1.6372517E+05  1.6315952E+05  1.6259341E+05
  1.6202688E+05  1.6145988E+05  1.6089244E+05  1.6032452E+05
  1.5975611E+05  1.5918722E+05  1.5861784E+05  1.5804795E+05
  1.5747756E+05  1.5690664E+05  1.5633519E+05  1.5576320E+05
  1.5519069E+05  1.5461759E+05  1.5404397E+05  1.5346977E+05
  1.5289498E+05  1.5231964E+05  1.5174370E+05  1.5116716E+05
  1.5059003E+05  1.5001230E+05  1.4943395E+05  1.4885498E+05
  1.4827541E+05  1.4769520E+05  1.4711436E+05  1.4653289E+05
  1.4595077E+05  1.4536800E+05  1.4478459E+05  1.4420052E+05
  1.4361580E+05  1.4303041E+05  1.4244436E+05  1.4185762E+05
  1.4127023E+05  1.4068217E+05  1.4009342E+05  1.3950400E+05
  1.3891388E+05  1.3832309E+05  1.3773161E+05  1.3713944E+05
  1.3654656E+05  1.3595302E+05  1.3535877E+05  1.3476383E+05
  1.3416819E+05  1.3357186E+05  1.3297483E+05  1.3237709E+05
  1.3177869E+05  1.3117956E+05  1.3057975E+05  1.2997924E+05
  1.2937804E+05  1.2877614E+05  1.2817355E+05  1.2757027E+05
  1.2696630E+05  1.2636165E+05  1.2575630E+05  1.2515028E+05
  1.2454358E+05  1.2393619E+05  1.2332814E+05  1.2271941E+05
  1.2211001E+05  1.2149995E+05  1.2088923E+05  1.2027785E+05
  1.1966582E+05  1.1905314E+05  1.1843982E+05  1.1782586E+05
  1.1721126E+05  1.1659604E+05  1.1598019E+05  1.1536373E+05
  1.1474666E+05  1.1412898E+05  1.1351070E+05  1.1289184E+05
  1.1227238E+05  1.1165236E+05  1.1103176E+05  1.1041059E+05
  1.0978888E+05  1.0916662E+05  1.0854382E+05  1.0792049E+05
  1.0729664E+05  1.0667227E+05  1.0604741E+05  1.0542205E+05
  1.0479621E+05  1.0416989E+05  1.0354312E+05  1.0291588E+05
  1.0228821E+05  1.0166011E+05  1.0103158E+05  1.0040265E+05
  9.9773320E+04  9.9143609E+04  9.8513516E+04  9.7883070E+04
  9.7252273E+04  9.6621141E+04  9.5989688E+04  9.5357930E+04
  9.4725867E+04  9.4093531E+04  9.3460930E+04  9.2828070E+04
  9.2194977E+04  9.1561656E+04  9.0928125E+04  9.0294406E+04
  8.9660516E+04  8.9026453E+04  8.8392250E+04  8.7757922E+04
  8.7123477E+04  8.6488938E+04  8.5854328E+04  8.5219648E+04
  8.4584930E+04  8.3950188E+04  8.3315438E+04  8.2680703E+04
  8.2045992E+04  8.1411336E+04  8.0776750E+04  8.0142250E+04
  7.9507859E+04  7.8873602E+04  7.8239484E+04  7.7605547E+04
  7.6971789E+04  7.6338250E+04  7.5704945E+04  7.5071891E+04
  7.4439109E+04  7.3806633E+04  7.3174477E+04  7.2542672E+04
  7.1911227E+04  7.1280172E+04  7.0649531E+04  7.0019336E+04
  6.9389602E+04  6.8760352E+04  6.8131609E+04  6.7503414E+04
  6.6875773E+04  6.6248719E+04  6.5622281E+04  6.4996488E+04
  6.4371355E+04  6.3746922E+04  6.3123203E+04  6.2500234E+04
  6.1878039E+04  6.1256648E+04  6.0636086E+04  6.0016387E+04
  5.9397574E+04  5.8779680E+04  5.8162730E+04  5.7546762E+04
  5.6931797E+04  5.6317867E+04  5.5705008E+04  5.5093242E+04
  5.4482609E+04  5.3873137E+04  5.3264855E+04  5.2657801E+04
  5.2052004E+04  5.1447492E+04  5.0844305E+04  5.0242473E+04
  4.9642027E+04  4.9043008E+04  4.8445445E+04  4.7849371E+04
  4.7254824E+04  4.6661840E+04  4.6070453E+04  4.5480695E+04
  4.4892609E+04  4.4306227E+04  4.3721586E+04  4.3138723E+04
  4.2557672E+04  4.1978477E+04  4.1401172E+04  4.0825797E+04
  4.0252387E+04  3.9680984E+04  3.9111629E+04  3.8544355E+04
  3.7979207E+04  3.7416223E+04  3.6855445E+04  3.6296914E+04
  3.5740668E+04  3.5186750E+04  3.4635199E+04  3.4086062E+04
  3.3539383E+04  3.2995195E+04  3.2453549E+04  3.1914484E+04
  3.1378049E+04  3.0844281E+04  3.0313230E+04  2.9784939E+04
  2.9259451E+04  2.8736814E+04  2.8217070E+04  2.7700270E+04
  2.7186455E+04  2.6675678E+04  2.6167979E+04  2.5663408E+04
  2.5162014E+04  2.4663844E+04  2.4168945E+04  2.3677367E+04
  2.3189158E+04  2.2704371E+04  2.2223051E+04  2.1745250E+04
  2.1271018E+04  2.0800404E+04  2.0333465E+04  1.9870244E+04
  1.9410799E+04  1.8955180E+04  1.8503438E+04  1.8055627E+04
  1.7611801E+04  1.7172012E+04  1.6736314E+04  1.6304761E+04
  1.5877409E+04  1.5454312E+04  1.5035525E+04  1.4621103E+04
  1.4211103E+04  1.3805580E+04  1.3404592E+04  1.3008195E+04
  1.2616447E+04  1.2229405E+04  1.1847128E+04  1.1469674E+04
  1.1097101E+04  1.0729468E+04  1.0366836E+04  1.0009264E+04
  9.6568125E+03  9.3095410E+03  8.9675117E+03  8.6307861E+03
  8.2994248E+03  7.9734902E+03  7.6530449E+03  7.3381514E+03
  7.0288735E+03  6.7252739E+03  6.4274170E+03  6.1353667E+03
  5.8491880E+03  5.5689458E+03  5.2947051E+03  5.0265322E+03
  4.7644927E+03  4.5086538E+03  4.2590820E+03  4.0158442E+03
  3.7790085E+03  3.5486428E+03  3.3248157E+03  3.1075955E+03
  2.8970515E+03  2.6932534E+03  2.4962710E+03  2.3061748E+03
  2.1230354E+03  1.9469237E+03  1.7779113E+03  1.6160701E+03
  1.4614720E+03  1.3141902E+03  1.1742972E+03  1.0418665E+03
  9.1697205E+02  7.9968793E+02  6.9008862E+02  5.8824927E+02
  4.9424509E+02  4.0815189E+02  3.3004581E+02  2.6000336E+02
  1.9810149E+02  1.4441753E+02  9.9029198E+01  6.2014645E+01
  3.3452377E+01  1.3421328E+01  2.0008223E+00 -1.9847136E+00
 -5.4026790E+00 -8.8169785E+00 -1.2227597E+01 -1.5634521E+01
 -1.9037737E+01 -2.2437227E+01 -2.5832981E+01 -2.9224983E+01
 -3.2613220E+01 -3.5997677E+01 -3.9378338E+01 -4.2755188E+01
 -4.6128216E+01 -4.9497410E+01 -5.2862747E+01 -5.6224224E+01
 -5.9581818E+01 -6.2935516E+01 -6.6285309E+01 -6.9631180E+01
 -7.2973106E+01 -7.6311089E+01 -7.9645103E+01 -8.2975136E+01
 -8.6301178E+01 -8.9623207E+01 -9.2941216E+01 -9.6255188E+01
 -9.9565109E+01 -1.0287096E+02 -1.0617274E+02 -1.0947042E+02
 -1.1276400E+02 -1.1605345E+02 -1.1933876E+02 -1.2261993E+02
 -1.2589692E+02 -1.2916974E+02 -1.3243837E+02 -1.3570279E+02
 -1.3896298E+02 -1.4221893E+02 -1.4547066E+02 -1.4871809E+02
 -1.5196124E+02 -1.5520012E+02 -1.5843469E+02 -1.6166493E+02
 -1.6489082E+02 -1.6811240E+02 -1.7132957E+02 -1.7454239E+02
 -1.7775079E+02 -1.8095480E+02 -1.8415440E+02 -1.8734955E+02
 -1.9054025E+02 -1.9372649E+02 -1.9690825E+02 -2.0008551E+02
 -2.0325827E+02 -2.0642651E+02 -2.0959021E+02 -2.1274936E+02
 -2.1590395E+02 -2.1905396E+02 -2.2219937E+02 -2.2534016E+02
 -2.2847636E+02 -2.3160791E+02 -2.3473482E+02 -2.3785706E+02
 -2.4097461E+02 -2.4408746E+02 -2.4719563E+02 -2.5029907E+02
 -2.5339778E+02 -2.5649173E+02 -2.5958093E+02 -2.6266534E+02
 -2.6574496E+02 -2.6881976E+02 -2.7188974E+02 -2.7495490E+02
 -2.7801523E+02 -2.8107065E+02 -2.8412122E+02 -2.8716690E+02
 -2.9020767E+02 -2.9324350E+02 -2.9627441E+02 -2.9930038E+02
 -3.0232138E+02 -3.0533740E+02 -3.0834845E+02 -3.1135446E+02
 -3.1435547E+02 -3.1735144E+02 -3.2034235E+02 -3.2332822E+02
 -3.2630899E+02 -3.2928467E+02 -3.3225525E+02 -3.3522073E+02
 -3.3818103E+02 -3.4113623E+02 -3.4408624E+02 -3.4703107E+02
 -3.4997073E+02 -3.5290515E+02 -3.5583438E+02 -3.5875836E+02
 -3.6167712E+02 -3.6459058E+02 -3.6749878E+02 -3.7040170E+02
 -3.7329929E+02 -3.7619156E+02 -3.7907852E+02 -3.8196011E+02
 -3.8483636E+02 -3.8770721E+02 -3.9057269E+02 -3.9343274E+02
 -3.9628741E+02 -3.9913660E+02 -4.0198038E+02 -4.0481866E+02
 -4.0765149E+02 -4.1047882E+02 -4.1330066E+02 -4.1611697E+02
 -4.1892773E+02 -4.2173297E+02 -4.2453265E+02 -4.2732672E+02
 -4.3011523E+02 -4.3289813E+02 -4.3567542E+02 -4.3844705E+02
 -4.4121304E+02 -4.4397336E+02 -4.4672803E+02 -4.4947699E+02
 -4.5222025E+02 -4.5495779E+02 -4.5768961E+02 -4.6041568E+02
 -4.6313596E+02 -4.6585049E+02 -4.6855923E+02 -4.7126215E+02
 -4.7395926E+02 -4.7665054E+02 -4.7933597E+02 -4.8201556E+02
 -4.8468924E+02 -4.8735706E+02 -4.9001895E+02 -4.9267493E+02
 -4.9532498E+02 -4.9796909E+02 -5.0060724E+02 -5.0323941E+02
 -5.0586557E+02 -5.0848575E+02 -5.1109991E+02 -5.1370801E+02
 -5.1631012E+02 -5.1890613E+02 -5.2149603E+02 -5.2407990E+02
 -5.2665765E+02 -5.2922931E+02 -5.3179480E+02 -5.3435413E+02
 -5.3690735E+02 -5.3945435E+02 -5.4199518E+02 -5.4452979E+02
 -5.4705817E+02 -5.4958038E+02 -5.5209625E+02 -5.5460596E+02
 -5.5710931E+02 -5.5960645E+02 -5.6209723E+02 -5.6458173E+02
 -5.6705988E+02 -5.6953168E+02 -5.7199713E+02 -5.7445618E+02
 -5.7690887E+02 -5.7935516E+02 -5.8179498E+02 -5.8422845E+02
 -5.8665540E+02 -5.8907593E+02 -5.9148999E+02 -5.9389752E+02
 -5.9629858E+02 -5.9869312E+02 -6.0108118E+02 -6.0346259E+02
 -6.0583752E+02 -6.0820587E+02 -6.1056757E+02 -6.1292273E+02
 -6.1527124E+02 -6.1761316E+02 -6.1994836E+02 -6.2227698E+02
 -6.2459888E+02 -6.2691412E+02 -6.2922266E+02 -6.3152441E+02
 -6.3381952E+02 -6.3610785E+02 -6.3838940E+02 -6.4066418E+02
 -6.4293219E+02 -6.4519342E+02 -6.4744781E+02 -6.4969537E+02
 -6.5193610E+02 -6.5416992E+02 -6.5639691E+02 -6.5861700E+02
 -6.6083020E+02 -6.6303650E+02 -6.6523584E+02 -6.6742822E+02
 -6.6961365E+02 -6.7179211E+02 -6.7396362E+02 -6.7612811E+02
 -6.7828558E+02 -6.8043597E+02 -6.8257941E+02 -6.8471576E+02
 -6.8684497E+02 -6.8896716E+02 -6.9108221E+02 -6.9319019E+02
 -6.9529102E+02 -6.9738470E+02 -6.9947119E+02 -7.0155054E+02
 -7.0362274E+02 -7.0568768E+02 -7.0774542E+02 -7.0979596E+02
 -7.1183923E+02 -7.1387524E+02 -7.1590399E+02 -7.1792542E+02
 -7.1993958E+02 -7.2194641E+02 -7.2394592E+02 -7.2593811E+02
 -7.2792291E+02 -7.2990033E+02 -7.3187036E+02 -7.3383301E+02
 -7.3578827E+02 -7.3773608E+02 -7.3967639E+02 -7.4160931E+02
 -7.4353473E+02 -7.4545270E+02 -7.4736316E+02 -7.4926605E+02
 -7.5116150E+02 -7.5304932E+02 -7.5492963E+02 -7.5680237E+02
 -7.5866748E+02 -7.6052502E+02 -7.6237494E+02 -7.6421722E+02
 -7.6605188E+02 -7.6787891E+02 -7.6969824E+02 -7.7150989E+02
 -7.7331378E+02 -7.7511005E+02 -7.7689856E+02 -7.7867926E+02
 -7.8045227E+02 -7.8221753E+02 -7.8397498E+02 -7.8572461E+02
 -7.8746643E+02 -7.8920044E+02 -7.9092657E+02 -7.9264484E+02
 -7.9435529E+02 -7.9605780E+02 -7.9775244E+02 -7.9943921E+02
 -8.0111798E+02 -8.0278888E+02 -8.0445178E+02 -8.0610669E+02
 -8.0775366E+02 -8.0939258E+02 -8.1102350E+02 -8.1264642E+02
 -8.1426129E+02 -8.1586810E+02 -8.1746680E+02 -8.1905750E+02
 -8.2064001E+02 -8.2221448E+02 -8.2378076E+02 -8.2533893E+02
 -8.2688898E+02 -8.2843079E+02 -8.2996442E+02 -8.3148993E+02
 -8.3300714E+02 -8.3451617E+02 -8.3601697E+02 -8.3750946E+02
 -8.3899371E+02 -8.4046967E+02 -8.4193732E+02 -8.4339667E+02
 -8.4484772E+02 -8.4629041E+02 -8.4772473E+02 -8.4915070E+02
 -8.5056824E+02 -8.5197742E+02 -8.5337817E+02 -8.5477057E+02
 -8.5615442E+02 -8.5752985E+02 -8.5889685E+02 -8.6025531E+02
 -8.6160529E+02 -8.6294678E+02 -8.6427972E+02 -8.6560413E+02
 -8.6691998E+02 -8.6822729E+02 -8.6952600E+02 -8.7081610E+02
 -8.7209760E+02 -8.7337042E+02 -8.7463464E+02 -8.7589020E+02
 -8.7713708E+02 -8.7837531E+02 -8.7960486E+02 -8.8082562E+02
 -8.8203772E+02 -8.8324103E+02 -8.8443561E+02 -8.8562146E+02
 -8.8679846E+02 -8.8796674E+02 -8.8912616E+02 -8.9027673E+02
 -8.9141846E+02 -8.9255139E+02 -8.9367542E+02 -8.9479053E+02
 -8.9589679E+02 -8.9699414E+02 -8.9808252E+02 -8.9916205E+02
 -9.0023254E+02 -9.0129407E+02 -9.0234668E+02 -9.0339020E+02
 -9.0442474E+02 -9.0545032E+02 -9.0646680E+02 -9.0747424E+02
 -9.0847260E+02 -9.0946191E+02 -9.1044208E+02 -9.1141315E+02
 -9.1237512E+02 -9.1332794E+02 -9.1427161E+02 -9.1520605E+02
 -9.1613141E+02 -9.1704749E+02 -9.1795441E+02 -9.1885205E+02
 -9.1974054E+02 -9.2061969E+02 -9.2148962E+02 -9.2235022E+02
 -9.2320160E+02 -9.2404358E+02 -9.2487628E+02 -9.2569965E+02
 -9.2651367E+02 -9.2731830E+02 -9.2811359E+02 -9.2889941E+02
 -9.2967590E+02 -9.3044293E+02 -9.3120050E+02 -9.3194861E+02
 -9.3268732E+02 -9.3341650E+02 -9.3413617E+02 -9.3484637E+02
 -9.3554700E+02 -9.3623810E+02 -9.3691968E+02 -9.3759167E+02
 -9.3825409E+02 -9.3890692E+02 -9.3955011E+02 -9.4018372E+02
 -9.4080768E+02 -9.4142194E+02 -9.4202655E+02 -9.4262152E+02
 -9.4320679E+02 -9.4378229E+02 -9.4434808E+02 -9.4490417E+02
 -9.4545050E+02 -9.4598706E+02 -9.4651385E+02 -9.4703082E+02
 -9.4753796E+02 -9.4803534E+02 -9.4852283E+02 -9.4900049E+02
 -9.4946826E+02 -9.4992621E+02 -9.5037421E+02 -9.5081232E+02
 -9.5124048E+02 -9.5165875E+02 -9.5206702E+02 -9.5246533E+02
 -9.5285370E+02 -9.5323206E+02 -9.5360040E+02 -9.5395874E+02
 -9.5430701E+02 -9.5464520E+02 -9.5497339E+02 -9.5529144E+02
 -9.5559943E+02 -9.5589734E+02 -9.5618506E+02 -9.5646271E+02
 -9.5673016E+02 -9.5698749E+02 -9.5723456E+02 -9.5747150E+02
 -9.5769818E+02 -9.5791473E+02 -9.5812097E+02 -9.5831696E+02
 -9.5850269E+02 -9.5867816E+02 -9.5884332E+02 -9.5899817E+02
 -9.5914270E+02 -9.5927692E+02 -9.5940076E+02 -9.5951422E+02
 -9.5961731E+02 -9.5971002E+02 -9.5979236E+02 -9.5986420E+02
 -9.5992566E+02 -9.5997662E+02 -9.6001715E+02 -9.6004718E+02
 -9.6006677E+02 -9.6007581E+02 -9.6007428E+02 -9.6006232E+02
 -9.6003973E+02 -9.6000659E+02 -9.5996289E+02 -9.5990857E+02
 -9.5984369E+02 -9.5976813E+02 -9.5968195E+02 -9.5958514E+02
 -9.5947760E+02 -9.5935950E+02 -9.5923059E+02 -9.5909106E+02
 -9.5894073E+02 -9.5877972E+02 -9.5860797E+02 -9.5842542E+02
 -9.5823212E+02 -9.5802795E+02 -9.5781305E+02 -9.5758728E+02
 -9.5735071E+02 -9.5710333E+02 -9.5684503E+02 -9.5657587E+02
 -9.5629578E+02 -9.5600482E+02 -9.5570294E+02 -9.5539008E+02
 -9.5506628E+02 -9.5473157E+02 -9.5438586E+02 -9.5402911E+02
 -9.5366144E+02 -9.5328265E+02 -9.5289288E+02 -9.5249207E+02
 -9.5208020E+02 -9.5165723E+02 -9.5122314E+02 -9.5077802E+02
 -9.5032172E+02 -9.4985431E+02 -9.4937573E+02 -9.4888599E+02
 -9.4838507E+02 -9.4787299E+02 -9.4734967E+02 -9.4681512E+02
 -9.4626935E+02 -9.4571234E+02 -9.4514404E+02 -9.4456451E+02
 -9.4397363E+02 -9.4337146E+02 -9.4275800E+02 -9.4213318E+02
 -9.4149701E+02 -9.4084949E+02 -9.4019061E+02 -9.3952032E+02
 -9.3883862E+02 -9.3814551E+02 -9.3744092E+02 -9.3672491E+02
 -9.3599750E+02 -9.3525854E+02 -9.3450812E+02 -9.3374615E+02
 -9.3297272E+02 -9.3218768E+02 -9.3139117E+02 -9.3058307E+02
 -9.2976337E+02 -9.2893213E+02 -9.2808923E+02 -9.2723474E+02
 -9.2636859E+02 -9.2549078E+02 -9.2460138E+02 -9.2370026E+02
 -9.2278741E+02 -9.2186292E+02 -9.2092670E+02 -9.1997870E+02
 -9.1901898E+02 -9.1804749E+02 -9.1706427E+02 -9.1606921E+02
 -9.1506238E+02 -9.1404370E+02 -9.1301318E+02 -9.1197083E+02
 -9.1091663E+02 -9.0985052E+02 -9.0877252E+02 -9.0768262E+02
 -9.0658081E+02 -9.0546710E+02 -9.0434137E+02 -9.0320374E+02
 -9.0205414E+02 -9.0089252E+02 -8.9971887E+02 -8.9853326E+02
 -8.9733557E+02 -8.9612585E+02 -8.9490405E+02 -8.9367023E+02
 -8.9242426E+02 -8.9116620E+02 -8.8989606E+02 -8.8861377E+02
 -8.8731927E+02 -8.8601270E+02 -8.8469391E+02 -8.8336292E+02
 -8.8201971E+02 -8.8066431E+02 -8.7929669E+02 -8.7791681E+02
 -8.7652466E+02 -8.7512024E+02 -8.7370355E+02 -8.7227454E+02
 -8.7083319E+02 -8.6937958E+02 -8.6791351E+02 -8.6643518E+02
 -8.6494446E+02 -8.6344128E+02 -8.6192578E+02 -8.6039783E+02
 -8.5885742E+02 -8.5730457E+02 -8.5573932E+02 -8.5416150E+02
 -8.5257129E+02 -8.5096851E+02 -8.4935321E+02 -8.4772540E+02
 -8.4608502E+02 -8.4443213E+02 -8.4276660E+02 -8.4108856E+02
 -8.3939789E+02 -8.3769458E+02 -8.3597864E+02 -8.3425006E+02
 -8.3250879E+02 -8.3075488E+02 -8.2898828E+02 -8.2720898E+02
 -8.2541693E+02 -8.2361218E+02 -8.2179468E+02 -8.1996442E+02
 -8.1812140E+02 -8.1626556E+02 -8.1439691E+02 -8.1251550E+02
 -8.1062122E+02 -8.0871405E+02 -8.0679413E+02 -8.0486127E+02
 -8.0291553E+02 -8.0095685E+02 -7.9898529E+02 -7.9700079E+02
 -7.9500336E+02 -7.9299292E+02 -7.9096960E+02 -7.8893323E+02
 -7.8687500E+02 -7.8482629E+02 -7.8278381E+02 -7.8074756E+02
 -7.7871741E+02 -7.7669348E+02 -7.7467566E+02 -7.7266394E+02
 -7.7065833E+02 -7.6865875E+02 -7.6666528E+02 -7.6467780E+02
 -7.6269635E+02 -7.6072089E+02 -7.5875140E+02 -7.5678784E+02
 -7.5483020E+02 -7.5287848E+02 -7.5093262E+02 -7.4899268E+02
 -7.4705853E+02 -7.4513025E+02 -7.4320770E+02 -7.4129102E+02
 -7.3938007E+02 -7.3747485E+02 -7.3557538E+02 -7.3368158E+02
 -7.3179352E+02 -7.2991107E+02 -7.2803430E+02 -7.2616315E+02
 -7.2429761E+02 -7.2243762E+02 -7.2058325E+02 -7.1873444E+02
 -7.1689111E+02 -7.1505334E+02 -7.1322101E+02 -7.1139423E+02
 -7.0957288E+02 -7.0775696E+02 -7.0594641E+02 -7.0414130E+02
 -7.0234161E+02 -7.0054724E+02 -6.9875824E+02 -6.9697455E+02
 -6.9519617E+02 -6.9342310E+02 -6.9165527E+02 -6.8989270E+02
 -6.8813544E+02 -6.8638330E+02 -6.8463641E+02 -6.8289471E+02
 -6.8115820E+02 -6.7942682E+02 -6.7770050E+02 -6.7597937E+02
 -6.7426337E+02 -6.7255237E+02 -6.7084650E+02 -6.6914563E+02
 -6.6744977E+02 -6.6575897E+02 -6.6407318E+02 -6.6239233E+02
 -6.6071643E+02 -6.5904547E+02 -6.5737952E+02 -6.5571838E+02
 -6.5406219E+02 -6.5241089E+02 -6.5076440E+02 -6.4912280E+02
 -6.4748602E+02 -6.4585400E+02 -6.4422687E+02 -6.4260443E+02
 -6.4098682E+02 -6.3937396E+02 -6.3776581E+02 -6.3616235E+02
 -6.3456360E+02 -6.3296960E+02 -6.3138019E+02 -6.2979547E+02
 -6.2821539E+02 -6.2663995E+02 -6.2506909E+02 -6.2350281E+02
 -6.2194110E+02 -6.2038403E+02 -6.1883142E+02 -6.1728339E+02
 -6.1573987E+02 -6.1420081E+02 -6.1266626E+02 -6.1113623E+02
 -6.0961060E+02 -6.0808942E+02 -6.0657269E+02 -6.0506036E+02
 -6.0355243E+02 -6.0204883E+02 -6.0054968E+02 -5.9905481E+02
 -5.9756433E+02 -5.9607819E+02 -5.9459631E+02 -5.9311877E+02
 -5.9164545E+02 -5.9017645E+02 -5.8871167E+02 -5.8725116E+02
 -5.8579486E+02 -5.8434277E+02 -5.8289490E+02 -5.8145123E+02
 -5.8001166E+02 -5.7857629E+02 -5.7714508E+02 -5.7571796E+02
 -5.7429498E+02 -5.7287610E+02 -5.7146130E+02 -5.7005054E+02
 -5.6864392E+02 -5.6724127E+02 -5.6584271E+02 -5.6444812E+02
 -5.6305762E+02 -5.6167102E+02 -5.6028845E+02 -5.5890985E+02
 -5.5753522E+02 -5.5616449E+02 -5.5479773E+02 -5.5343488E+02
 -5.5207593E+02 -5.5072083E+02 -5.4936969E+02 -5.4802234E+02
 -5.4667889E+02 -5.4533923E+02 -5.4400348E+02 -5.4267145E+02
 -5.4134326E+02 -5.4001892E+02 -5.3869830E+02 -5.3738147E+02
 -5.3606836E+02 -5.3475903E+02 -5.3345343E+02 -5.3215149E+02
 -5.3085333E+02 -5.2955884E+02 -5.2826801E+02 -5.2698083E+02
 -5.2569733E+02 -5.2441748E+02 -5.2314130E+02 -5.2186871E+02
 -5.2059973E+02 -5.1933435E+02 -5.1807251E+02 -5.1681433E+02
 -5.1555963E+02 -5.1430853E+02 -5.1306097E+02 -5.1181696E+02
 -5.1057645E+02 -5.0933942E+02 -5.0810593E+02 -5.0687589E+02
 -5.0564932E+02 -5.0442624E+02 -5.0320657E+02 -5.0199036E+02
 -5.0077759E+02 -4.9956824E+02 -4.9836227E+02 -4.9715970E+02
 -4.9596054E+02 -4.9476471E+02 -4.9357227E+02 -4.9238318E+02
 -4.9119745E+02 -4.9001501E+02 -4.8883591E+02 -4.8766013E+02
 -4.8648764E+02 -4.8531842E+02 -4.8415250E+02 -4.8298984E+02
 -4.8183041E+02 -4.8067426E+02 -4.7952133E+02 -4.7837164E+02
 -4.7722516E+02 -4.7608188E+02 -4.7494177E+02 -4.7380487E+02
 -4.7267114E+02 -4.7154059E+02 -4.7041318E+02 -4.6928891E+02
 -4.6816776E+02 -4.6704974E+02 -4.6593484E+02 -4.6482306E+02
 -4.6371436E+02 -4.6260873E+02 -4.6150620E+02 -4.6040671E+02
 -4.5931030E+02 -4.5821692E+02 -4.5712656E+02 -4.5603925E+02
 -4.5495496E+02 -4.5387366E+02 -4.5279535E+02 -4.5172006E+02
 -4.5064771E+02 -4.4957837E+02 -4.4851196E+02 -4.4744849E+02
 -4.4638797E+02 -4.4533041E+02 -4.4427573E+02 -4.4322400E+02
 -4.4217514E+02 -4.4112921E+02 -4.4008615E+02 -4.3904596E+02
 -4.3800864E+02 -4.3697418E+02 -4.3594257E+02 -4.3491379E+02
 -4.3388785E+02 -4.3286472E+02 -4.3184442E+02 -4.3082693E+02
 -4.2981219E+02 -4.2880029E+02 -4.2779117E+02 -4.2678479E+02
 -4.2578119E+02 -4.2478033E+02 -4.2378220E+02 -4.2278683E+02
 -4.2179419E+02 -4.2080426E+02 -4.1981702E+02 -4.1883249E+02
 -4.1785068E+02 -4.1687152E+02 -4.1589505E+02 -4.1492126E+02
 -4.1395010E+02 -4.1298163E+02 -4.1201578E+02 -4.1105255E+02
 -4.1009195E+02 -4.0913400E+02 -4.0817862E+02 -4.0722586E+02
 -4.0627570E+02 -4.0532812E+02 -4.0438312E+02 -4.0344067E+02
 -4.0250082E+02 -4.0156348E+02 -4.0062872E+02 -3.9969647E+02
 -3.9876678E+02 -3.9783960E+02 -3.9691492E+02 -3.9599274E+02
 -3.9507309E+02 -3.9415591E+02 -3.9324121E+02 -3.9232901E+02
 -3.9141925E+02 -3.9051196E+02 -3.8960712E+02 -3.8870474E+02
 -3.8780478E+02 -3.8690726E+02 -3.8601218E+02 -3.8511948E+02
 -3.8422919E+02 -3.8334134E+02 -3.8245584E+02 -3.8157275E+02
 -3.8069202E+02 -3.7981366E+02 -3.7893768E+02 -3.7806406E+02
 -3.7719278E+02 -3.7632382E+02 -3.7545721E+02 -3.7459293E+02
 -3.7373099E+02 -3.7287134E+02 -3.7201401E+02 -3.7115897E+02
 -3.7030621E+02 -3.6945575E+02 -3.6860757E+02 -3.6776166E+02
 -3.6691800E+02 -3.6607660E+02 -3.6523746E+02 -3.6440057E+02
 -3.6356589E+02 -3.6273346E+02 -3.6190326E+02 -3.6107526E+02
 -3.6024948E+02 -3.5942587E+02 -3.5860449E+02 -3.5778531E+02
 -3.5696829E+02 -3.5615344E+02 -3.5534076E+02 -3.5453027E+02
 -3.5372192E+02 -3.5291571E+02 -3.5211163E+02 -3.5130972E+02
 -3.5050992E+02 -3.4971225E+02 -3.4891669E+02 -3.4812326E+02
 -3.4733191E+02 -3.4654269E+02 -3.4575552E+02 -3.4497046E+02
 -3.4418747E+02 -3.4340656E+02 -3.4262772E+02 -3.4185092E+02
 -3.4107620E+02 -3.4030350E+02 -3.3953287E+02 -3.3876425E+02
 -3.3799768E+02 -3.3723312E+02 -3.3647058E+02 -3.3571005E+02
 -3.3495154E+02 -3.3419501E+02 -3.3344049E+02 -3.3268793E+02
 -3.3193738E+02 -3.3118878E+02 -3.3044217E+02 -3.2969751E+02
 -3.2895480E+02 -3.2821405E+02 -3.2747525E+02 -3.2673837E+02
 -3.2600345E+02 -3.2527045E+02 -3.2453937E+02 -3.2381021E+02
 -3.2308295E+02 -3.2235760E+02 -3.2163412E+02 -3.2091260E+02
 -3.2019293E+02 -3.1947513E+02 -3.1875922E+02 -3.1804517E+02
 -3.1733301E+02 -3.1662268E+02 -3.1591422E+02 -3.1520761E+02
 -3.1450284E+02 -3.1379993E+02 -3.1309882E+02 -3.1239954E+02
 -3.1170209E+02 -3.1100647E+02 -3.1031265E+02 -3.0962064E+02
 -3.0893042E+02 -3.0824197E+02 -3.0755536E+02 -3.0687051E+02
 -3.0618744E+02 -3.0550613E+02 -3.0482660E+02 -3.0414883E+02
 -3.0347281E+02 -3.0279855E+02 -3.0212604E+02 -3.0145526E+02
 -3.0078625E+02 -3.0011893E+02 -2.9945337E+02 -2.9878952E+02
 -2.9812738E+02 -2.9746695E+02 -2.9680823E+02 -2.9615121E+02
 -2.9549588E+02 -2.9484225E+02 -2.9419031E+02 -2.9354004E+02
 -2.9289145E+02 -2.9224454E+02 -2.9159930E+02 -2.9095572E+02
 -2.9031378E+02 -2.8967349E+02 -2.8903485E+02 -2.8839786E+02
 -2.8776251E+02 -2.8712878E+02 -2.8649670E+02 -2.8586624E+02
 -2.8523737E+02 -2.8461014E+02 -2.8398450E+02 -2.8336047E+02
 -2.8273804E+02 -2.8211722E+02 -2.8149796E+02 -2.8088031E+02
 -2.8026425E+02 -2.7964972E+02 -2.7903680E+02 -2.7842545E+02
 -2.7781564E+02 -2.7720740E+02 -2.7660071E+02 -2.7599557E+02
 -2.7539197E+02 -2.7478989E+02 -2.7418939E+02 -2.7359039E+02
 -2.7299292E+02 -2.7239697E+02 -2.7180255E+02 -2.7120963E+02
 -2.7061823E+02 -2.7002832E+02 -2.6943991E+02 -2.6885300E+02
 -2.6826758E+02 -2.6768365E+02 -2.6710120E+02 -2.6652023E+02
 -2.6594073E+02 -2.6536270E+02 -2.6478616E+02 -2.6421106E+02
 -2.6363742E+02 -2.6306522E+02 -2.6249448E+02 -2.6192517E+02
 -2.6135730E+02 -2.6079089E+02 -2.6022589E+02 -2.5966232E+02
 -2.5910019E+02 -2.5853946E+02 -2.5798016E+02 -2.5742227E+02
 -2.5686578E+02 -2.5631070E+02 -2.5575700E+02 -2.5520473E+02
 -2.5465382E+02 -2.5410431E+02 -2.5355617E+02 -2.5300941E+02
 -2.5246405E+02 -2.5192004E+02 -2.5137740E+02 -2.5083614E+02
 -2.5029620E+02 -2.4975764E+02 -2.4922044E+02 -2.4868459E+02
 -2.4815005E+02 -2.4761688E+02 -2.4708504E+02 -2.4655453E+02
 -2.4602534E+02 -2.4549750E+02 -2.4497096E+02 -2.4444574E+02
 -2.4392183E+02 -2.4339925E+02 -2.4287794E+02 -2.4235796E+02
 -2.4183926E+02 -2.4132187E+02 -2.4080577E+02 -2.4029095E+02
 -2.3977742E+02 -2.3926517E+02 -2.3875420E+02 -2.3824448E+02
 -2.3773605E+02 -2.3722888E+02 -2.3672298E+02 -2.3621832E+02
 -2.3571492E+02 -2.3521278E+02 -2.3471188E+02 -2.3421223E+02
 -2.3371382E+02 -2.3321664E+02 -2.3272070E+02 -2.3222598E+02
 -2.3173250E+02 -2.3124023E+02 -2.3074921E+02 -2.3025937E+02
 -2.2977077E+02 -2.2928336E+02 -2.2879716E+02 -2.2831216E+02
 -2.2782835E+02 -2.2734576E+02 -2.2686435E+02 -2.2638412E+02
 -2.2590509E+02 -2.2542725E+02 -2.2495058E+02 -2.2447507E+02
 -2.2400073E+02 -2.2352757E+02 -2.2305559E+02 -2.2258476E+02
 -2.2211510E+02 -2.2164658E+02 -2.2117921E+02 -2.2071300E+02
 -2.2024794E+02 -2.1978401E+02 -2.1932123E+02 -2.1885957E+02
 -2.1839906E+02 -2.1793968E+02 -2.1748141E+02 -2.1702429E+02
 -2.1656828E+02 -2.1611337E+02 -2.1565961E+02 -2.1520692E+02
 -2.1475537E+02 -2.1430492E+02 -2.1385556E+02 -2.1340730E+02
 -2.1296014E+02 -2.1251407E+02 -2.1206911E+02 -2.1162520E+02
 -2.1118240E+02 -2.1074068E+02 -2.1030002E+02 -2.0986044E+02
 -2.0942194E+02 -2.0898451E+02 -2.0854814E+02 -2.0811282E+02
 -2.0767859E+02 -2.0724541E+02 -2.0681326E+02 -2.0638217E+02
 -2.0595213E+02 -2.0552315E+02 -2.0509518E+02 -2.0466827E+02
 -2.0424242E+02 -2.0381757E+02 -2.0339375E+02 -2.0297096E+02
 -2.0254922E+02 -2.0212848E+02 -2.0170876E+02 -2.0129005E+02
 -2.0087238E+02 -2.0045570E+02 -2.0004004E+02 -1.9962537E+02
 -1.9921172E+02 -1.9879906E+02 -1.9838739E+02 -1.9797672E+02
 -1.9756705E+02 -1.9715836E+02 -1.9675066E+02 -1.9634393E+02
 -1.9593819E+02 -1.9553343E+02 -1.9512965E+02 -1.9472684E+02
 -1.9432500E+02 -1.9392410E+02 -1.9352420E+02 -1.9312524E+02
 -1.9272726E+02 -1.9233022E+02 -1.9193414E+02 -1.9153902E+02
 -1.9114484E+02 -1.9075160E+02 -1.9035931E+02 -1.8996796E+02
 -1.8957755E+02 -1.8918806E+02 -1.8879953E+02 -1.8841191E+02
 -1.8802522E+02 -1.8763947E+02 -1.8725464E+02 -1.8687073E+02
 -1.8648772E+02 -1.8610564E+02 -1.8572447E+02 -1.8534422E+02
 -1.8496487E+02 -1.8458643E+02 -1.8420888E+02 -1.8383224E+02
 -1.8345650E+02 -1.8308165E+02 -1.8270769E+02 -1.8233463E+02
 -1.8196246E+02 -1.8159117E+02 -1.8122076E+02 -1.8085124E+02
 -1.8048259E+02 -1.8011482E+02 -1.7974792E+02 -1.7938191E+02
 -1.7901675E+02 -1.7865247E+02 -1.7828905E+02 -1.7792648E+02
 -1.7756477E+02 -1.7720393E+02 -1.7684395E+02 -1.7648482E+02
 -1.7612653E+02 -1.7576910E+02 -1.7541251E+02 -1.7505676E+02
 -1.7470186E+02 -1.7434779E+02 -1.7399455E+02 -1.7364217E+02
 -1.7329060E+02 -1.7293988E+02 -1.7258997E+02 -1.7224091E+02
 -1.7189264E+02 -1.7154521E+02 -1.7119859E+02 -1.7085280E+02
 -1.7050781E+02 -1.7016364E+02 -1.6982028E+02 -1.6947774E+02
 -1.6913599E+02 -1.6879504E+02 -1.6845490E+02 -1.6811555E+02
 -1.6777702E+02 -1.6743927E+02 -1.6710231E+02 -1.6676614E+02
 -1.6643077E+02 -1.6609618E+02 -1.6576237E+02 -1.6542935E+02
 -1.6509711E+02 -1.6476564E+02 -1.6443495E+02 -1.6410504E+02
 -1.6377589E+02 -1.6344753E+02 -1.6311992E+02 -1.6279308E+02
 -1.6246700E+02 -1.6214169E+02 -1.6181714E+02 -1.6149335E+02
 -1.6117030E+02 -1.6084801E+02 -1.6052647E+02 -1.6020569E+02
 -1.5988565E+02 -1.5956636E+02 -1.5924780E+02 -1.5893001E+02
 -1.5861295E+02 -1.5829662E+02 -1.5798102E+02 -1.5766615E+02
 -1.5735204E+02 -1.5703864E+02 -1.5672597E+02 -1.5641402E+02
 -1.5610280E+02 -1.5579230E+02 -1.5548251E+02 -1.5517346E+02
 -1.5486513E+02 -1.5455750E+02 -1.5425058E+02 -1.5394437E+02
 -1.5363889E+02 -1.5333409E+02 -1.5303000E+02 -1.5272662E+02
 -1.5242395E+02 -1.5212196E+02 -1.5182068E+02 -1.5152010E+02
 -1.5122021E+02 -1.5092101E+02 -1.5062250E+02 -1.5032468E+02
 -1.5002756E+02 -1.4973109E+02 -1.4943533E+02 -1.4914024E+02
 -1.4884586E+02 -1.4855212E+02 -1.4825906E+02 -1.4796669E+02
 -1.4767499E+02 -1.4738396E+02 -1.4709360E+02 -1.4680389E+02
 -1.4651488E+02 -1.4622650E+02 -1.4593880E+02 -1.4565175E+02
 -1.4536536E+02 -1.4507964E+02 -1.4479456E+02 -1.4451013E+02
 -1.4422636E+02 -1.4394324E+02 -1.4366077E+02 -1.4337894E+02
 -1.4309776E+02 -1.4281721E+02 -1.4253732E+02 -1.4225807E+02
 -1.4197945E+02 -1.4170148E+02 -1.4142412E+02 -1.4114742E+02
 -1.4087132E+02 -1.4059587E+02 -1.4032104E+02 -1.4004684E+02
 -1.3977328E+02 -1.3950032E+02 -1.3922800E+02 -1.3895628E+02
 -1.3868520E+02 -1.3841472E+02 -1.3814487E+02 -1.3787563E+02
 -1.3760699E+02 -1.3733897E+02 -1.3707155E+02 -1.3680475E+02
 -1.3653854E+02 -1.3627295E+02 -1.3600797E+02 -1.3574358E+02
 -1.3547977E+02 -1.3521658E+02 -1.3495398E+02 -1.3469199E+02
 -1.3443056E+02 -1.3416975E+02 -1.3390952E+02 -1.3364989E+02
 -1.3339082E+02 -1.3313235E+02 -1.3287447E+02 -1.3261717E+02
 -1.3236044E+02 -1.3210431E+02 -1.3184875E+02 -1.3159377E+02
 -1.3133936E+02 -1.3108553E+02 -1.3083224E+02 -1.3057956E+02
 -1.3032742E+02 -1.3007588E+02 -1.2982489E+02 -1.2957446E+02
 -1.2932460E+02 -1.2907530E+02 -1.2882655E+02 -1.2857838E+02
 -1.2833075E+02 -1.2808369E+02 -1.2783718E+02 -1.2759122E+02
 -1.2734581E+02 -1.2710095E+02 -1.2685665E+02 -1.2661289E+02
 -1.2636967E+02 -1.2612700E+02 -1.2588488E+02 -1.2564330E+02
 -1.2540225E+02 -1.2516175E+02 -1.2492179E+02 -1.2468236E+02
 -1.2444346E+02 -1.2420511E+02 -1.2396728E+02 -1.2372998E+02
 -1.2349322E+02 -1.2325698E+02 -1.2302127E+02 -1.2278608E+02
 -1.2255142E+02 -1.2231729E+02 -1.2208367E+02 -1.2185058E+02
 -1.2161800E+02 -1.2138594E+02 -1.2115440E+02 -1.2092337E+02
 -1.2069286E+02 -1.2046286E+02 -1.2023337E+02 -1.2000439E+02
 -1.1977592E+02 -1.1954795E+02 -1.1932050E+02 -1.1909354E+02
 -1.1886709E+02 -1.1864115E+02 -1.1841570E+02 -1.1819075E+02
 -1.1796631E+02 -1.1774236E+02 -1.1751890E+02 -1.1729594E+02
 -1.1707347E+02 -1.1685150E+02 -1.1663001E+02 -1.1640902E+02
 -1.1618851E+02 -1.1596849E+02 -1.1574896E+02 -1.1552991E+02
 -1.1531134E+02 -1.1509326E+02 -1.1487566E+02 -1.1465854E+02
 -1.1444189E+02 -1.1422573E+02 -1.1401004E+02 -1.1379482E+02
 -1.1358008E+02 -1.1336582E+02 -1.1315202E+02 -1.1293869E+02
 -1.1272583E+02 -1.1251344E+02 -1.1230152E+02 -1.1209006E+02
 -1.1187907E+02 -1.1166854E+02 -1.1145847E+02 -1.1124887E+02
 -1.1103972E+02 -1.1083103E+02 -1.1062280E+02 -1.1041503E+02
 -1.1020771E+02 -1.1000084E+02 -1.0979443E+02 -1.0958847E+02
 -1.0938296E+02 -1.0917789E+02 -1.0897328E+02 -1.0876912E+02
 -1.0856540E+02 -1.0836212E+02 -1.0815929E+02 -1.0795691E+02
 -1.0775496E+02 -1.0755345E+02 -1.0735239E+02 -1.0715176E+02
 -1.0695157E+02 -1.0675182E+02 -1.0655250E+02 -1.0635361E+02
 -1.0615516E+02 -1.0595714E+02 -1.0575955E+02 -1.0556239E+02
 -1.0536566E+02 -1.0516936E+02 -1.0497348E+02 -1.0477803E+02
 -1.0458301E+02 -1.0438840E+02 -1.0419422E+02 -1.0400046E+02
 -1.0380712E+02 -1.0361420E+02 -1.0342170E+02 -1.0322962E+02
 -1.0303795E+02 -1.0284669E+02 -1.0265585E+02 -1.0246543E+02
 -1.0227541E+02 -1.0208581E+02 -1.0189662E+02 -1.0170783E+02
 -1.0151945E+02 -1.0133148E+02 -1.0114392E+02 -1.0095676E+02
 -1.0077001E+02 -1.0058365E+02 -1.0039770E+02 -1.0021215E+02
 -1.0002700E+02 -9.9842255E+01 -9.9657906E+01 -9.9473946E+01
 -9.9290390E+01 -9.9107224E+01 -9.8924454E+01 -9.8742073E+01
 -9.8560089E+01 -9.8378494E+01 -9.8197296E+01 -9.8016479E+01
 -9.7836052E+01 -9.7656013E+01 -9.7476364E+01 -9.7297096E+01
 -9.7118210E+01 -9.6939713E+01 -9.6761597E+01 -9.6583862E+01
 -9.6406509E+01 -9.6229538E+01 -9.6052940E+01 -9.5876724E+01
 -9.5700882E+01 -9.5525421E+01 -9.5350334E+01 -9.5175613E+01
 -9.5001274E+01 -9.4827309E+01 -9.4653709E+01 -9.4480484E+01
 -9.4307625E+01 -9.4135139E+01 -9.3963020E+01 -9.3791267E+01
 -9.3619881E+01 -9.3448860E+01 -9.3278206E+01 -9.3107910E+01
 -9.2937981E+01 -9.2768410E+01 -9.2599205E+01 -9.2430351E+01
 -9.2261864E+01 -9.2093735E+01 -9.1925964E+01 -9.1758545E+01
 -9.1591484E+01 -9.1424774E+01 -9.1258423E+01 -9.1092422E+01
 -9.0926773E+01 -9.0761482E+01 -9.0596535E+01 -9.0431938E+01
 -9.0267693E+01 -9.0103790E+01 -8.9940239E+01 -8.9777031E+01
 -8.9614166E+01 -8.9451653E+01 -8.9289482E+01 -8.9127655E+01
 -8.8966164E+01 -8.8805016E+01 -8.8644211E+01 -8.8483749E+01
 -8.8323616E+01 -8.8163834E+01 -8.8004379E+01 -8.7845261E+01
 -8.7686478E+01 -8.7528038E+01 -8.7369926E+01 -8.7212143E+01
 -8.7054703E+01 -8.6897583E+01 -8.6740799E+01 -8.6584343E+01
 -8.6428223E+01 -8.6272423E+01 -8.6116959E+01 -8.5961815E+01
 -8.5806999E+01 -8.5652504E+01 -8.5498337E+01 -8.5344498E+01
 -8.5190971E+01 -8.5037781E+01 -8.4884903E+01 -8.4732346E+01
 -8.4580109E+01 -8.4428192E+01 -8.4276588E+01 -8.4125313E+01
 -8.3974342E+01 -8.3823692E+01 -8.3673363E+01 -8.3523338E+01
 -8.3373634E+01 -8.3224243E+01 -8.3075165E+01 -8.2926392E+01
 -8.2777931E+01 -8.2629784E+01 -8.2481949E+01 -8.2334419E+01
 -8.2187195E+01 -8.2040276E+01 -8.1893669E+01 -8.1747360E+01
 -8.1601364E+01 -8.1455673E+01 -8.1310280E+01 -8.1165192E+01
 -8.1020401E+01 -8.0875916E+01 -8.0731735E+01 -8.0587845E+01
 -8.0444260E+01 -8.0300972E+01 -8.0157982E+01 -8.0015289E+01
 -7.9872894E+01 -7.9730789E+01 -7.9588982E+01 -7.9447472E+01
 -7.9306252E+01 -7.9165329E+01 -7.9024689E+01 -7.8884346E+01
 -7.8744293E+01 -7.8604538E+01 -7.8465065E+01 -7.8325874E+01
 -7.8186981E+01 -7.8048370E+01 -7.7910049E+01 -7.7772011E+01
 -7.7634262E+01 -7.7496796E+01 -7.7359612E+01 -7.7222717E+01
 -7.7086098E+01 -7.6949760E+01 -7.6813705E+01 -7.6677933E+01
 -7.6542442E+01 -7.6407227E+01 -7.6272293E+01 -7.6137634E+01
 -7.6003258E+01 -7.5869148E+01 -7.5735321E+01 -7.5601768E+01
 -7.5468491E+01 -7.5335487E+01 -7.5202759E+01 -7.5070305E+01
 -7.4938118E+01 -7.4806206E+01 -7.4674561E+01 -7.4543190E+01
 -7.4412086E+01 -7.4281250E+01 -7.4150681E+01 -7.4020386E+01
 -7.3890350E+01 -7.3760590E+01 -7.3631088E+01 -7.3501854E+01
 -7.3372887E+01 -7.3244179E+01 -7.3115738E+01 -7.2987556E+01
 -7.2859642E+01 -7.2731987E+01 -7.2604591E+01 -7.2477455E+01
 -7.2350578E+01 -7.2223961E+01 -7.2097603E+01 -7.1971504E+01
 -7.1845665E+01 -7.1720078E+01 -7.1594749E+01 -7.1469673E+01
 -7.1344856E+01 -7.1220291E+01 -7.1095978E+01 -7.0971916E+01
 -7.0848114E+01 -7.0724556E+01 -7.0601257E+01 -7.0478203E+01
 -7.0355400E+01 -7.0232849E+01 -7.0110542E+01 -6.9988487E+01
 -6.9866684E+01 -6.9745117E+01 -6.9623810E+01 -6.9502739E+01
 -6.9381920E+01 -6.9261345E+01 -6.9141006E+01 -6.9020920E+01
 -6.8901077E+01 -6.8781471E+01 -6.8662109E+01 -6.8542992E+01
 -6.8424118E+01 -6.8305481E+01 -6.8187080E+01 -6.8068924E+01
 -6.7951004E+01 -6.7833321E+01 -6.7715881E+01 -6.7598671E+01
 -6.7481705E+01 -6.7364967E+01 -6.7248474E+01 -6.7132210E+01
 -6.7016182E+01 -6.6900383E+01 -6.6784828E+01 -6.6669495E+01
 -6.6554398E+01 -6.6439537E+01 -6.6324905E+01 -6.6210503E+01
 -6.6096329E+01 -6.5982384E+01 -6.5868668E+01 -6.5755188E+01
 -6.5641930E+01 -6.5528900E+01 -6.5416100E+01 -6.5303520E+01
 -6.5191170E+01 -6.5079048E+01 -6.4967148E+01 -6.4855469E+01
 -6.4744019E+01 -6.4632790E+01 -6.4521790E+01 -6.4411003E+01
 -6.4300446E+01 -6.4190102E+01 -6.4079987E+01 -6.3970085E+01
 -6.3860405E+01 -6.3750946E+01 -6.3641708E+01 -6.3532684E+01
 -6.3423882E+01 -6.3315292E+01 -6.3206924E+01 -6.3098770E+01
 -6.2990829E+01 -6.2883106E+01 -6.2775600E+01 -6.2668308E+01
 -6.2561230E+01 -6.2454361E+01 -6.2347710E+01 -6.2241268E+01
 -6.2135040E+01 -6.2029022E+01 -6.1923214E+01 -6.1817619E+01
 -6.1712234E+01 -6.1607056E+01 -6.1502090E+01 -6.1397331E+01
 -6.1292782E+01 -6.1188438E+01 -6.1084301E+01 -6.0980373E+01
 -6.0876652E+01 -6.0773132E+01 -6.0669823E+01 -6.0566715E+01
 -6.0463814E+01 -6.0361115E+01 -6.0258617E+01 -6.0156326E+01
 -6.0054237E+01 -5.9952351E+01 -5.9850662E+01 -5.9749180E+01
 -5.9647896E+01 -5.9546810E+01 -5.9445927E+01 -5.9345242E+01
 -5.9244755E+01 -5.9144466E+01 -5.9044380E+01 -5.8944489E+01
 -5.8844791E+01 -5.8745293E+01 -5.8645992E+01 -5.8546886E+01
 -5.8447975E+01 -5.8349258E+01 -5.8250740E+01 -5.8152412E+01
 -5.8054279E+01 -5.7956337E+01 -5.7858589E+01 -5.7761032E+01
 -5.7663670E+01 -5.7566498E+01 -5.7469517E+01 -5.7372726E+01
 -5.7276127E+01 -5.7179714E+01 -5.7083492E+01 -5.6987461E+01
 -5.6891617E+01 -5.6795959E+01 -5.6700493E+01 -5.6605209E+01
 -5.6510113E+01 -5.6415207E+01 -5.6320484E+01 -5.6225945E+01
 -5.6131596E+01 -5.6037426E+01 -5.5943443E+01 -5.5849644E+01
 -5.5756027E+01 -5.5662598E+01 -5.5569347E+01 -5.5476276E+01
 -5.5383392E+01 -5.5290688E+01 -5.5198162E+01 -5.5105820E+01
 -5.5013657E+01 -5.4921673E+01 -5.4829868E+01 -5.4738243E+01
 -5.4646797E+01 -5.4555531E+01 -5.4464439E+01 -5.4373528E+01
 -5.4282791E+01 -5.4192230E+01 -5.4101849E+01 -5.4011642E+01
 -5.3921608E+01 -5.3831753E+01 -5.3742069E+01 -5.3652561E+01
 -5.3563229E+01 -5.3474068E+01 -5.3385078E+01 -5.3296265E+01
 -5.3207623E+01 -5.3119152E+01 -5.3030853E+01 -5.2942726E+01
 -5.2854771E+01 -5.2766983E+01 -5.2679367E+01 -5.2591919E+01
 -5.2504642E+01 -5.2417534E+01 -5.2330593E+01 -5.2243820E+01
 -5.2157219E+01 -5.2070782E+01 -5.1984512E+01 -5.1898411E+01
 -5.1812473E+01 -5.1726704E+01 -5.1641098E+01 -5.1555656E+01
 -5.1470383E+01 -5.1385273E+01 -5.1300327E+01 -5.1215546E+01
 -5.1130928E+01 -5.1046471E+01 -5.0962177E+01 -5.0878048E+01
 -5.0794079E+01 -5.0710270E+01 -5.0626625E+01 -5.0543140E+01
 -5.0459816E+01 -5.0376652E+01 -5.0293648E+01 -5.0210804E+01
 -5.0128117E+01 -5.0045589E+01 -4.9963223E+01 -4.9881012E+01
 -4.9798962E+01 -4.9717064E+01 -4.9635326E+01 -4.9553745E+01
 -4.9472321E+01 -4.9391052E+01 -4.9309940E+01 -4.9228981E+01
 -4.9148178E+01 -4.9067532E+01 -4.8987038E+01 -4.8906700E+01
 -4.8826511E+01 -4.8746483E+01 -4.8666599E+01 -4.8586872E+01
 -4.8507301E+01 -4.8427876E+01 -4.8348606E+01 -4.8269485E+01
 -4.8190517E+01 -4.8111702E+01 -4.8033031E+01 -4.7954517E+01
 -4.7876148E+01 -4.7797932E+01 -4.7719860E+01 -4.7641941E+01
 -4.7564167E+01 -4.7486546E+01 -4.7409065E+01 -4.7331738E+01
 -4.7254559E+01 -4.7177521E+01 -4.7100632E+01 -4.7023891E+01
 -4.6947292E+01 -4.6870842E+01 -4.6794537E+01 -4.6718376E+01
 -4.6642361E+01 -4.6566486E+01 -4.6490761E+01 -4.6415176E+01
 -4.6339733E+01 -4.6264435E+01 -4.6189281E+01 -4.6114269E+01
 -4.6039398E+01 -4.5964668E+01 -4.5890079E+01 -4.5815636E+01
 -4.5741329E+01 -4.5667164E+01 -4.5593140E+01 -4.5519253E+01
 -4.5445507E+01 -4.5371902E+01 -4.5298435E+01 -4.5225105E+01
 -4.5151917E+01 -4.5078865E+01 -4.5005951E+01 -4.4933174E+01
 -4.4860538E+01 -4.4788036E+01 -4.4715672E+01 -4.4643440E+01
 -4.4571350E+01 -4.4499393E+01 -4.4427570E+01 -4.4355885E+01
 -4.4284332E+01 -4.4212917E+01 -4.4141636E+01 -4.4070484E+01
 -4.3999470E+01 -4.3928589E+01 -4.3857841E+01 -4.3787228E+01
 -4.3716743E+01 -4.3646393E+01 -4.3576176E+01 -4.3506088E+01
 -4.3436134E+01 -4.3366310E+01 -4.3296619E+01 -4.3227055E+01
 -4.3157623E+01 -4.3088322E+01 -4.3019150E+01 -4.2950108E+01
 -4.2881195E+01 -4.2812412E+01 -4.2743755E+01 -4.2675228E+01
 -4.2606831E+01 -4.2538559E+01 -4.2470413E+01 -4.2402397E+01
 -4.2334511E+01 -4.2266747E+01 -4.2199112E+01 -4.2131603E+01
 -4.2064220E+01 -4.1996960E+01 -4.1929829E+01 -4.1862820E+01
 -4.1795940E+01 -4.1729179E+01 -4.1662548E+01 -4.1596039E+01
 -4.1529652E+01 -4.1463390E+01 -4.1397251E+01 -4.1331238E+01
 -4.1265343E+01 -4.1199574E+01 -4.1133926E+01 -4.1068401E+01
 -4.1002995E+01 -4.0937714E+01 -4.0872551E+01 -4.0807510E+01
 -4.0742592E+01 -4.0677792E+01 -4.0613113E+01 -4.0548553E+01
 -4.0484116E+01 -4.0419792E+01 -4.0355595E+01 -4.0291512E+01
 -4.0227547E+01 -4.0163704E+01 -4.0099976E+01 -4.0036369E+01
 -3.9972878E+01 -3.9909504E+01 -3.9846249E+01 -3.9783108E+01
 -3.9720085E+01 -3.9657181E+01 -3.9594391E+01 -3.9531715E+01
 -3.9469154E+01 -3.9406712E+01 -3.9344383E+01 -3.9282173E+01
 -3.9220074E+01 -3.9158092E+01 -3.9096222E+01 -3.9034466E+01
 -3.8972824E+01 -3.8911297E+01 -3.8849884E+01 -3.8788582E+01
 -3.8727390E+01 -3.8666317E+01 -3.8605350E+01 -3.8544502E+01
 -3.8483761E+01 -3.8423134E+01 -3.8362617E+01 -3.8302212E+01
 -3.8241917E+01 -3.8181732E+01 -3.8121658E+01 -3.8061695E+01
 -3.8001842E+01 -3.7942097E+01 -3.7882465E+01 -3.7822941E+01
 -3.7763523E+01 -3.7704216E+01 -3.7645020E+01 -3.7585930E+01
 -3.7526947E+01 -3.7468075E+01 -3.7409309E+01 -3.7350651E+01
 -3.7292099E+01 -3.7233658E+01 -3.7175320E+01 -3.7117088E+01
 -3.7058964E+01 -3.7000946E+01 -3.6943035E+01 -3.6885227E+01
 -3.6827526E+01 -3.6769932E+01 -3.6712440E+01 -3.6655056E+01
 -3.6597775E+01 -3.6540600E+01 -3.6483524E+01 -3.6426556E+01
 -3.6369694E+01 -3.6312931E+01 -3.6256275E+01 -3.6199718E+01
 -3.6143269E+01 -3.6086918E+01 -3.6030670E+01 -3.5974525E+01
 -3.5918484E+01 -3.5862545E+01 -3.5806705E+01 -3.5750969E+01
 -3.5695332E+01 -3.5639797E+01 -3.5584362E+01 -3.5529030E+01
 -3.5473793E+01 -3.5418659E+01 -3.5363628E+01 -3.5308693E+01
 -3.5253860E+01 -3.5199123E+01 -3.5144489E+01 -3.5089951E+01
 -3.5035515E+01 -3.4981174E+01 -3.4926933E+01 -3.4872787E+01
 -3.4818745E+01 -3.4764797E+01 -3.4710945E+01 -3.4657192E+01
 -3.4603539E+01 -3.4549976E+01 -3.4496517E+01 -3.4443150E+01
 -3.4389881E+01 -3.4336708E+01 -3.4283630E+01 -3.4230648E+01
 -3.4177761E+01 -3.4124969E+01 -3.4072273E+01 -3.4019672E+01
 -3.3967167E+01 -3.3914757E+01 -3.3862438E+01 -3.3810215E+01
 -3.3758087E+01 -3.3706051E+01 -3.3654106E+01 -3.3602261E+01
 -3.3550503E+01 -3.3498840E+01 -3.3447273E+01 -3.3395794E+01
 -3.3344410E+01 -3.3293118E+01 -3.3241917E+01 -3.3190807E+01
 -3.3139790E+01 -3.3088867E+01 -3.3038033E+01 -3.2987289E+01
 -3.2936638E+01 -3.2886074E+01 -3.2835606E+01 -3.2785221E+01
 -3.2734932E+01 -3.2684731E+01 -3.2634621E+01 -3.2584599E+01
 -3.2534668E+01 -3.2484825E+01 -3.2435074E+01 -3.2385406E+01
 -3.2335831E+01 -3.2286346E+01 -3.2236946E+01 -3.2187634E+01
 -3.2138412E+01 -3.2089275E+01 -3.2040230E+01 -3.1991270E+01
 -3.1942396E+01 -3.1893612E+01 -3.1844913E+01 -3.1796301E+01
 -3.1747774E+01 -3.1699335E+01 -3.1650984E+01 -3.1602716E+01
 -3.1554537E+01 -3.1506439E+01 -3.1458431E+01 -3.1410505E+01
 -3.1362667E+01 -3.1314913E+01 -3.1267242E+01 -3.1219658E+01
 -3.1172157E+01 -3.1124741E+01 -3.1077410E+01 -3.1030161E+01
 -3.0982998E+01 -3.0935917E+01 -3.0888920E+01 -3.0842005E+01
 -3.0795176E+01 -3.0748426E+01 -3.0701761E+01 -3.0655178E+01
 -3.0608679E+01 -3.0562262E+01 -3.0515924E+01 -3.0469671E+01
 -3.0423500E+01 -3.0377409E+01 -3.0331400E+01 -3.0285473E+01
 -3.0239626E+01 -3.0193861E+01 -3.0148176E+01 -3.0102571E+01
 -3.0057049E+01 -3.0011604E+01 -2.9966242E+01 -2.9920958E+01
 -2.9875753E+01 -2.9830629E+01 -2.9785585E+01 -2.9740622E+01
 -2.9695736E+01 -2.9650928E+01 -2.9606199E+01 -2.9561550E+01
 -2.9516979E+01 -2.9472488E+01 -2.9428074E+01 -2.9383738E+01
 -2.9339479E+01 -2.9295300E+01 -2.9251196E+01 -2.9207170E+01
 -2.9163223E+01 -2.9119352E+01 -2.9075558E+01 -2.9031841E+01
 -2.8988199E+01 -2.8944635E+01 -2.8901150E+01 -2.8857737E+01
 -2.8814402E+01 -2.8771143E+01 -2.8727959E+01 -2.8684851E+01
 -2.8641817E+01 -2.8598862E+01 -2.8555979E+01 -2.8513170E+01
 -2.8470440E+01 -2.8427780E+01 -2.8385199E+01 -2.8342690E+01
 -2.8300255E+01 -2.8257895E+01 -2.8215609E+01 -2.8173395E+01
 -2.8131256E+01 -2.8089191E+01 -2.8047199E+01 -2.8005280E+01
 -2.7963434E+01 -2.7921661E+01 -2.7879963E+01 -2.7838333E+01
 -2.7796780E+01 -2.7755297E+01 -2.7713886E+01 -2.7672548E+01
 -2.7631283E+01 -2.7590088E+01 -2.7548964E+01 -2.7507914E+01
 -2.7466932E+01 -2.7426023E+01 -2.7385185E+01 -2.7344419E+01
 -2.7303722E+01 -2.7263098E+01 -2.7222542E+01 -2.7182058E+01
 -2.7141644E+01 -2.7101299E+01 -2.7061026E+01 -2.7020821E+01
 -2.6980684E+01 -2.6940620E+01 -2.6900623E+01 -2.6860697E+01
 -2.6820841E+01 -2.6781052E+01 -2.6741331E+01 -2.6701679E+01
 -2.6662098E+01 -2.6622583E+01 -2.6583138E+01 -2.6543760E+01
 -2.6504452E+01 -2.6465208E+01 -2.6426035E+01 -2.6386929E+01
 -2.6347891E+01 -2.6308920E+01 -2.6270016E+01 -2.6231178E+01
 -2.6192408E+01 -2.6153706E+01 -2.6115068E+01 -2.6076498E+01
 -2.6037994E+01 -2.5999557E+01 -2.5961187E+01 -2.5922882E+01
 -2.5884644E+01 -2.5846470E+01 -2.5808361E+01 -2.5770321E+01
 -2.5732344E+01 -2.5694431E+01 -2.5656586E+01 -2.5618805E+01
 -2.5581087E+01 -2.5543436E+01 -2.5505850E+01 -2.5468327E+01
 -2.5430868E+01 -2.5393475E+01 -2.5356146E+01 -2.5318880E+01
 -2.5281677E+01 -2.5244539E+01 -2.5207466E+01 -2.5170456E+01
 -2.5133509E+01 -2.5096624E+01 -2.5059803E+01 -2.5023045E+01
 -2.4986349E+01 -2.4949717E+01 -2.4913147E+01 -2.4876640E+01
 -2.4840195E+01 -2.4803814E+01 -2.4767492E+01 -2.4731234E+01
 -2.4695038E+01 -2.4658903E+01 -2.4622829E+01 -2.4586819E+01
 -2.4550867E+01 -2.4514980E+01 -2.4479153E+01 -2.4443386E+01
 -2.4407681E+01 -2.4372034E+01 -2.4336452E+01 -2.4300928E+01
 -2.4265465E+01 -2.4230062E+01 -2.4194721E+01 -2.4159437E+01
 -2.4124216E+01 -2.4089054E+01 -2.4053951E+01 -2.4018909E+01
 -2.3983927E+01 -2.3949001E+01 -2.3914137E+01 -2.3879332E+01
 -2.3844585E+01 -2.3809898E+01 -2.3775270E+01 -2.3740702E+01
 -2.3706190E+01 -2.3671738E+01 -2.3637342E+01 -2.3603006E+01
 -2.3568729E+01 -2.3534510E+01 -2.3500347E+01 -2.3466246E+01
 -2.3432199E+01 -2.3398211E+01 -2.3364279E+01 -2.3330406E+01
 -2.3296589E+01 -2.3262831E+01 -2.3229128E+01 -2.3195482E+01
 -2.3161896E+01 -2.3128365E+01 -2.3094889E+01 -2.3061470E+01
 -2.3028109E+01 -2.2994802E+01 -2.2961554E+01 -2.2928360E+01
 -2.2895222E+01 -2.2862141E+01 -2.2829115E+01 -2.2796144E+01
 -2.2763229E+01 -2.2730371E+01 -2.2697567E+01 -2.2664818E+01
 -2.2632126E+01 -2.2599485E+01 -2.2566902E+01 -2.2534372E+01
 -2.2501900E+01 -2.2469481E+01 -2.2437115E+01 -2.2404804E+01
 -2.2372547E+01 -2.2340345E+01 -2.2308197E+01 -2.2276102E+01
 -2.2244062E+01 -2.2212076E+01 -2.2180143E+01 -2.2148264E+01
 -2.2116438E+01 -2.2084663E+01 -2.2052944E+01 -2.2021278E+01
 -2.1989664E+01 -2.1958105E+01 -2.1926598E+01 -2.1895144E+01
 -2.1863741E+01 -2.1832392E+01 -2.1801094E+01 -2.1769850E+01
 -2.1738655E+01 -2.1707516E+01 -2.1676428E+01 -2.1645391E+01
 -2.1614407E+01 -2.1583473E+01 -2.1552591E+01 -2.1521763E+01
 -2.1490984E+01 -2.1460257E+01 -2.1429581E+01 -2.1398956E+01
 -2.1368383E+01 -2.1337860E+01 -2.1307388E+01 -2.1276966E+01
 -2.1246597E+01 -2.1216276E+01 -2.1186008E+01 -2.1155788E+01
 -2.1125620E+01 -2.1095503E+01 -2.1065434E+01 -2.1035416E+01
 -2.1005447E+01 -2.0975529E+01 -2.0945660E+01 -2.0915838E+01
 -2.0886068E+01 -2.0856350E+01 -2.0826677E+01 -2.0797056E+01
 -2.0767483E+01 -2.0737959E+01 -2.0708485E+01 -2.0679058E+01
 -2.0649681E+01 -2.0620354E+01 -2.0591072E+01 -2.0561842E+01
 -2.0532660E+01 -2.0503525E+01 -2.0474438E+01 -2.0445398E+01
 -2.0416409E+01 -2.0387466E+01 -2.0358572E+01 -2.0329725E+01
 -2.0300926E+01 -2.0272175E+01 -2.0243471E+01 -2.0214815E+01
 -2.0186205E+01 -2.0157642E+01 -2.0129129E+01 -2.0100660E+01
 -2.0072241E+01 -2.0043865E+01 -2.0015539E+01 -1.9987259E+01
 -1.9959024E+01 -1.9930838E+01 -1.9902697E+01 -1.9874601E+01
 -1.9846554E+01 -1.9818550E+01 -1.9790594E+01 -1.9762684E+01
 -1.9734819E+01 -1.9707003E+01 -1.9679230E+01 -1.9651503E+01
 -1.9623821E+01 -1.9596186E+01 -1.9568594E+01 -1.9541048E+01
 -1.9513550E+01 -1.9486094E+01 -1.9458685E+01 -1.9431320E+01
 -1.9403999E+01 -1.9376724E+01 -1.9349495E+01 -1.9322308E+01
 -1.9295168E+01 -1.9268070E+01 -1.9241018E+01 -1.9214010E+01
 -1.9187046E+01 -1.9160126E+01 -1.9133251E+01 -1.9106419E+01
 -1.9079632E+01 -1.9052887E+01 -1.9026188E+01 -1.8999531E+01
 -1.8972918E+01 -1.8946346E+01 -1.8919821E+01 -1.8893337E+01
 -1.8866899E+01 -1.8840502E+01 -1.8814150E+01 -1.8787838E+01
 -1.8761572E+01 -1.8735346E+01 -1.8709164E+01 -1.8683025E+01
 -1.8656927E+01 -1.8630875E+01 -1.8604862E+01 -1.8578894E+01
 -1.8552965E+01 -1.8527081E+01 -1.8501238E+01 -1.8475437E+01
 -1.8449678E+01 -1.8423962E+01 -1.8398287E+01 -1.8372654E+01
 -1.8347061E+01 -1.8321512E+01 -1.8296003E+01 -1.8270536E+01
 -1.8245111E+01 -1.8219727E+01 -1.8194384E+01 -1.8169081E+01
 -1.8143820E+01 -1.8118601E+01 -1.8093420E+01 -1.8068281E+01
 -1.8043184E+01 -1.8018127E+01 -1.7993111E+01 -1.7968136E+01
 -1.7943199E+01 -1.7918304E+01 -1.7893450E+01 -1.7868633E+01
 -1.7843861E+01 -1.7819124E+01 -1.7794432E+01 -1.7769775E+01
 -1.7745161E+01 -1.7720587E+01 -1.7696051E+01 -1.7671556E+01
 -1.7647100E+01 -1.7622683E+01 -1.7598307E+01 -1.7573969E+01
 -1.7549669E+01 -1.7525410E+01 -1.7501190E+01 -1.7477009E+01
 -1.7452866E+01 -1.7428762E+01 -1.7404697E+01 -1.7380672E+01
 -1.7356686E+01 -1.7332737E+01 -1.7308826E+01 -1.7284954E+01
 -1.7261122E+01 -1.7237328E+01 -1.7213572E+01 -1.7189854E+01
 -1.7166172E+01 -1.7142530E+01 -1.7118925E+01 -1.7095360E+01
 -1.7071831E+01 -1.7048342E+01 -1.7024887E+01 -1.7001472E+01
 -1.6978094E+01 -1.6954754E+01 -1.6931452E+01 -1.6908186E+01
 -1.6884958E+01 -1.6861767E+01 -1.6838614E+01 -1.6815496E+01
 -1.6792418E+01 -1.6769375E+01 -1.6746368E+01 -1.6723398E+01
 -1.6700466E+01 -1.6677570E+01 -1.6654713E+01 -1.6631889E+01
 -1.6609104E+01 -1.6586353E+01 -1.6563641E+01 -1.6540964E+01
 -1.6518324E+01 -1.6495718E+01 -1.6473150E+01 -1.6450617E+01
 -1.6428122E+01 -1.6405661E+01 -1.6383236E+01 -1.6360846E+01
 -1.6338493E+01 -1.6316175E+01 -1.6293894E+01 -1.6271646E+01
 -1.6249435E+01 -1.6227259E+01 -1.6205118E+01 -1.6183012E+01
 -1.6160942E+01 -1.6138906E+01 -1.6116907E+01 -1.6094942E+01
 -1.6073011E+01 -1.6051117E+01 -1.6029257E+01 -1.6007429E+01
 -1.5985639E+01 -1.5963882E+01 -1.5942160E+01 -1.5920473E+01
 -1.5898820E+01 -1.5877201E+01 -1.5855616E+01 -1.5834066E+01
 -1.5812550E+01 -1.5791068E+01 -1.5769620E+01 -1.5748206E+01
 -1.5726826E+01 -1.5705480E+01 -1.5684167E+01 -1.5662888E+01
 -1.5641643E+01 -1.5620432E+01 -1.5599254E+01 -1.5578110E+01
 -1.5556999E+01 -1.5535921E+01 -1.5514877E+01 -1.5493866E+01
 -1.5472888E+01 -1.5451944E+01 -1.5431032E+01 -1.5410153E+01
 -1.5389308E+01 -1.5368495E+01 -1.5347715E+01 -1.5326968E+01
 -1.5306253E+01 -1.5285572E+01 -1.5264922E+01 -1.5244306E+01
 -1.5223722E+01 -1.5203170E+01 -1.5182650E+01 -1.5162163E+01
 -1.5141708E+01 -1.5121286E+01 -1.5100895E+01 -1.5080537E+01
 -1.5060210E+01 -1.5039916E+01 -1.5019653E+01 -1.4999422E+01
 -1.4979224E+01 -1.4959056E+01 -1.4938921E+01 -1.4918817E+01
 -1.4898744E+01 -1.4878703E+01 -1.4858694E+01 -1.4838716E+01
 -1.4818769E+01 -1.4798854E+01 -1.4778969E+01 -1.4759116E+01
 -1.4739294E+01 -1.4719503E+01 -1.4699744E+01 -1.4680015E+01
 -1.4660316E+01 -1.4640649E+01 -1.4621013E+01 -1.4601407E+01
 -1.4581832E+01 -1.4562287E+01 -1.4542773E+01 -1.4523290E+01
 -1.4503837E+01 -1.4484414E+01 -1.4465022E+01 -1.4445660E+01
 -1.4426328E+01 -1.4407027E+01 -1.4387755E+01 -1.4368514E+01
 -1.4349302E+01 -1.4330121E+01 -1.4310969E+01 -1.4291848E+01
 -1.4272756E+01 -1.4253694E+01 -1.4234661E+01 -1.4215659E+01
 -1.4196685E+01 -1.4177742E+01 -1.4158828E+01 -1.4139943E+01
 -1.4121088E+01 -1.4102262E+01 -1.4083465E+01 -1.4064697E+01
 -1.4045959E+01 -1.4027250E+01 -1.4008570E+01 -1.3989918E+01
 -1.3971296E+01 -1.3952703E+01 -1.3934139E+01 -1.3915603E+01
 -1.3897096E+01 -1.3878618E+01 -1.3860168E+01 -1.3841748E+01
 -1.3823355E+01 -1.3804992E+01 -1.3786656E+01 -1.3768349E+01
 -1.3750071E+01 -1.3731820E+01 -1.3713598E+01 -1.3695404E+01
 -1.3677239E+01 -1.3659101E+01 -1.3640992E+01 -1.3622910E+01
 -1.3604857E+01 -1.3586831E+01 -1.3568833E+01 -1.3550863E+01
 -1.3532921E+01 -1.3515007E+01 -1.3497120E+01 -1.3479260E+01
 -1.3461429E+01 -1.3443625E+01 -1.3425848E+01 -1.3408099E+01
 -1.3390377E+01 -1.3372682E+01 -1.3355015E+01 -1.3337375E+01
 -1.3319762E+01 -1.3302176E+01 -1.3284617E+01 -1.3267086E+01
 -1.3249581E+01 -1.3232103E+01 -1.3214652E+01 -1.3197228E+01
 -1.3179831E+01 -1.3162461E+01 -1.3145117E+01 -1.3127800E+01
 -1.3110510E+01 -1.3093246E+01 -1.3076008E+01 -1.3058797E+01
 -1.3041613E+01 -1.3024455E+01 -1.3007323E+01 -1.2990217E+01
 -1.2973138E+01 -1.2956085E+01 -1.2939058E+01 -1.2922057E+01
 -1.2905082E+01 -1.2888134E+01 -1.2871211E+01 -1.2854314E+01
 -1.2837443E+01 -1.2820598E+01 -1.2803778E+01 -1.2786985E+01
 -1.2770217E+01 -1.2753474E+01 -1.2736758E+01 -1.2720066E+01
 -1.2703401E+01 -1.2686761E+01 -1.2670146E+01 -1.2653556E+01
 -1.2636992E+01 -1.2620454E+01 -1.2603940E+01 -1.2587452E+01
 -1.2570989E+01 -1.2554551E+01 -1.2538138E+01 -1.2521750E+01
 -1.2505387E+01 -1.2489049E+01 -1.2472736E+01 -1.2456447E+01
 -1.2440184E+01 -1.2423945E+01 -1.2407731E+01 -1.2391542E+01
 -1.2375377E+01 -1.2359237E+01 -1.2343122E+01 -1.2327031E+01
 -1.2310964E+01 -1.2294922E+01 -1.2278905E+01 -1.2262911E+01
 -1.2246942E+01 -1.2230997E+01 -1.2215077E+01 -1.2199180E+01
 -1.2183308E+01 -1.2167460E+01 -1.2151636E+01 -1.2135835E+01
 -1.2120059E+01 -1.2104307E+01 -1.2088579E+01 -1.2072874E+01
 -1.2057193E+01 -1.2041536E+01 -1.2025903E+01 -1.2010293E+01
 -1.1994707E+01 -1.1979145E+01 -1.1963606E+01 -1.1948091E+01
 -1.1932599E+01 -1.1917131E+01 -1.1901686E+01 -1.1886264E+01
 -1.1870866E+01 -1.1855490E+01 -1.1840139E+01 -1.1824810E+01
 -1.1809504E+01 -1.1794222E+01 -1.1778963E+01 -1.1763726E+01
 -1.1748513E+01 -1.1733322E+01 -1.1718155E+01 -1.1703010E+01
 -1.1687889E+01 -1.1672790E+01 -1.1657713E+01 -1.1642660E+01
 -1.1627629E+01 -1.1612621E+01 -1.1597635E+01 -1.1582672E+01
 -1.1567731E+01 -1.1552813E+01 -1.1537918E+01 -1.1523044E+01
 -1.1508194E+01 -1.1493365E+01 -1.1478559E+01 -1.1463775E+01
 -1.1449013E+01 -1.1434273E+01 -1.1419556E+01 -1.1404860E+01
 -1.1390187E+01 -1.1375536E+01 -1.1360906E+01 -1.1346299E+01
 -1.1331713E+01 -1.1317150E+01 -1.1302608E+01 -1.1288088E+01
 -1.1273590E+01 -1.1259113E+01 -1.1244658E+01 -1.1230225E+01
 -1.1215814E+01 -1.1201424E+01 -1.1187055E+01 -1.1172708E+01
 -1.1158383E+01 -1.1144079E+01 -1.1129796E+01 -1.1115535E+01
 -1.1101295E+01 -1.1087076E+01 -1.1072878E+01 -1.1058702E+01
 -1.1044547E+01 -1.1030413E+01 -1.1016300E+01 -1.1002208E+01
 -1.0988137E+01 -1.0974087E+01 -1.0960059E+01 -1.0946051E+01
 -1.0932064E+01 -1.0918097E+01 -1.0904152E+01 -1.0890227E+01
 -1.0876323E+01 -1.0862440E+01 -1.0848578E+01 -1.0834736E+01
 -1.0820914E+01 -1.0807114E+01 -1.0793334E+01 -1.0779574E+01
 -1.0765835E+01 -1.0752116E+01 -1.0738417E+01 -1.0724739E+01
 -1.0711082E+01 -1.0697444E+01 -1.0683827E+01 -1.0670230E+01
 -1.0656653E+01 -1.0643097E+01 -1.0629560E+01 -1.0616044E+01
 -1.0602547E+01 -1.0589071E+01 -1.0575614E+01 -1.0562178E+01
 -1.0548761E+01 -1.0535365E+01 -1.0521988E+01 -1.0508631E+01
 -1.0495294E+01 -1.0481976E+01 -1.0468678E+01 -1.0455400E+01
 -1.0442142E+01 -1.0428903E+01 -1.0415684E+01 -1.0402484E+01
 -1.0389304E+01 -1.0376143E+01 -1.0363002E+01 -1.0349880E+01
 -1.0336777E+01 -1.0323694E+01 -1.0310630E+01 -1.0297586E+01
 -1.0284561E+01 -1.0271554E+01 -1.0258568E+01 -1.0245600E+01
 -1.0232651E+01 -1.0219722E+01 -1.0206811E+01 -1.0193920E+01
 -1.0181047E+01 -1.0168194E+01 -1.0155359E+01 -1.0142544E+01
 -1.0129747E+01 -1.0116969E+01 -1.0104210E+01 -1.0091469E+01
 -1.0078747E+01 -1.0066044E+01 -1.0053360E+01 -1.0040695E+01
 -1.0028048E+01 -1.0015419E+01 -1.0002809E+01 -9.9902182E+00
 -9.9776449E+00 -9.9650908E+00 -9.9525547E+00 -9.9400368E+00
 -9.9275379E+00 -9.9150562E+00 -9.9025936E+00 -9.8901501E+00
 -9.8777237E+00 -9.8653154E+00 -9.8529263E+00 -9.8405542E+00
 -9.8282013E+00 -9.8158655E+00 -9.8035479E+00 -9.7912493E+00
 -9.7789679E+00 -9.7667046E+00 -9.7544594E+00 -9.7422314E+00
 -9.7300215E+00 -9.7178307E+00 -9.7056561E+00 -9.6935005E+00
 -9.6813622E+00 -9.6692410E+00 -9.6571379E+00 -9.6450529E+00
 -9.6329851E+00 -9.6209354E+00 -9.6089029E+00 -9.5968876E+00
 -9.5848904E+00 -9.5729113E+00 -9.5609484E+00 -9.5490036E+00
 -9.5370760E+00 -9.5251656E+00 -9.5132732E+00 -9.5013971E+00
 -9.4895391E+00 -9.4776983E+00 -9.4658747E+00 -9.4540682E+00
 -9.4422789E+00 -9.4305067E+00 -9.4187517E+00 -9.4070129E+00
 -9.3952923E+00 -9.3835888E+00 -9.3719015E+00 -9.3602314E+00
 -9.3485785E+00 -9.3369427E+00 -9.3253241E+00 -9.3137217E+00
 -9.3021364E+00 -9.2905674E+00 -9.2790155E+00 -9.2674809E+00
 -9.2559624E+00 -9.2444601E+00 -9.2329750E+00 -9.2215071E+00
 -9.2100554E+00 -9.1986198E+00 -9.1872015E+00 -9.1757994E+00
 -9.1644144E+00 -9.1530447E+00 -9.1416922E+00 -9.1303558E+00
 -9.1190367E+00 -9.1077328E+00 -9.0964460E+00 -9.0851755E+00
 -9.0739202E+00 -9.0626822E+00 -9.0514603E+00 -9.0402546E+00
 -9.0290651E+00 -9.0178919E+00 -9.0067348E+00 -8.9955931E+00
 -8.9844685E+00 -8.9733591E+00 -8.9622660E+00 -8.9511890E+00
 -8.9401274E+00 -8.9290829E+00 -8.9180536E+00 -8.9070396E+00
 -8.8960428E+00 -8.8850613E+00 -8.8740950E+00 -8.8631449E+00
 -8.8522110E+00 -8.8412924E+00 -8.8303890E+00 -8.8195019E+00
 -8.8086309E+00 -8.7977753E+00 -8.7869349E+00 -8.7761097E+00
 -8.7653008E+00 -8.7545071E+00 -8.7437286E+00 -8.7329664E+00
 -8.7222195E+00 -8.7114878E+00 -8.7007713E+00 -8.6900702E+00
 -8.6793842E+00 -8.6687145E+00 -8.6580591E+00 -8.6474199E+00
 -8.6367950E+00 -8.6261864E+00 -8.6155920E+00 -8.6050129E+00
 -8.5944490E+00 -8.5839005E+00 -8.5733671E+00 -8.5628490E+00
 -8.5523453E+00 -8.5418577E+00 -8.5313845E+00 -8.5209255E+00
 -8.5104828E+00 -8.5000544E+00 -8.4896402E+00 -8.4792414E+00
 -8.4688578E+00 -8.4584894E+00 -8.4481344E+00 -8.4377956E+00
 -8.4274712E+00 -8.4171610E+00 -8.4068661E+00 -8.3965855E+00
 -8.3863192E+00 -8.3760681E+00 -8.3658314E+00 -8.3556099E+00
 -8.3454027E+00 -8.3352098E+00 -8.3250313E+00 -8.3148670E+00
 -8.3047180E+00 -8.2945833E+00 -8.2844629E+00 -8.2743568E+00
 -8.2642651E+00 -8.2541876E+00 -8.2441244E+00 -8.2340755E+00
 -8.2240410E+00 -8.2140207E+00 -8.2040148E+00 -8.1940231E+00
 -8.1840458E+00 -8.1740828E+00 -8.1641331E+00 -8.1541986E+00
 -8.1442776E+00 -8.1343708E+00 -8.1244774E+00 -8.1145992E+00
 -8.1047344E+00 -8.0948839E+00 -8.0850468E+00 -8.0752239E+00
 -8.0654144E+00 -8.0556202E+00 -8.0458384E+00 -8.0360708E+00
 -8.0263176E+00 -8.0165777E+00 -8.0068521E+00 -7.9971399E+00
 -7.9874415E+00 -7.9777570E+00 -7.9680858E+00 -7.9584284E+00
 -7.9487848E+00 -7.9391551E+00 -7.9295387E+00 -7.9199357E+00
 -7.9103465E+00 -7.9007707E+00 -7.8912086E+00 -7.8816600E+00
 -7.8721247E+00 -7.8626027E+00 -7.8530946E+00 -7.8435998E+00
 -7.8341179E+00 -7.8246498E+00 -7.8151951E+00 -7.8057537E+00
 -7.7963252E+00 -7.7869105E+00 -7.7775087E+00 -7.7681203E+00
 -7.7587452E+00 -7.7493830E+00 -7.7400346E+00 -7.7306986E+00
 -7.7213764E+00 -7.7120671E+00 -7.7027707E+00 -7.6934872E+00
 -7.6842170E+00 -7.6749601E+00 -7.6657157E+00 -7.6564846E+00
 -7.6472664E+00 -7.6380610E+00 -7.6288691E+00 -7.6196895E+00
 -7.6105227E+00 -7.6013694E+00 -7.5922284E+00 -7.5831003E+00
 -7.5739851E+00 -7.5648828E+00 -7.5557928E+00 -7.5467162E+00
 -7.5376520E+00 -7.5286002E+00 -7.5195613E+00 -7.5105352E+00
 -7.5015216E+00 -7.4925208E+00 -7.4835324E+00 -7.4745569E+00
 H_+     O_2-
  2.3785000E+06  2.3675510E+06  2.3566525E+06  2.3458040E+06
  2.3350055E+06  2.3242568E+06  2.3135575E+06  2.3029075E+06
  2.2923065E+06  2.2817542E+06  2.2712508E+06  2.2607955E+06
  2.2503882E+06  2.2400290E+06  2.2297175E+06  2.2194532E+06
  2.2092365E+06  2.1990668E+06  2.1889438E+06  2.1788672E+06
  2.1688372E+06  2.1588535E+06  2.1489155E+06  2.1390235E+06
  2.1291768E+06  2.1193755E+06  2.1096195E+06  2.0999080E+06
  2.0902416E+06  2.0806195E+06  2.0710418E+06  2.0615081E+06
  2.0520184E+06  2.0425722E+06  2.0331696E+06  2.0238104E+06
  2.0144941E+06  2.0052208E+06  1.9959901E+06  1.9868020E+06
  1.9776561E+06  1.9685522E+06  1.9594904E+06  1.9504702E+06
  1.9414916E+06  1.9325544E+06  1.9236582E+06  1.9148030E+06
  1.9059885E+06  1.8972146E+06  1.8884812E+06  1.8797879E+06
  1.8711346E+06  1.8625212E+06  1.8539475E+06  1.8454131E+06
  1.8369181E+06  1.8284622E+06  1.8200452E+06  1.8116670E+06
  1.8033274E+06  1.7950260E+06  1.7867630E+06  1.7785380E+06
  1.7703508E+06  1.7622012E+06  1.7540894E+06  1.7460148E+06
  1.7379772E+06  1.7299768E+06  1.7220131E+06  1.7140862E+06
  1.7061958E+06  1.6983416E+06  1.6905235E+06  1.6827415E+06
  1.6749954E+06  1.6672849E+06  1.6596098E+06  1.6519701E+06
  1.6443655E+06  1.6367960E+06  1.6292614E+06  1.6217614E+06
  1.6142959E+06  1.6068648E+06  1.5994679E+06  1.5921050E+06
  1.5847760E+06  1.5774808E+06  1.5702191E+06  1.5629909E+06
  1.5557960E+06  1.5486341E+06  1.5415054E+06  1.5344092E+06
  1.5273459E+06  1.5203151E+06  1.5133166E+06  1.5063502E+06
  1.4994161E+06  1.4925139E+06  1.4856432E+06  1.4788044E+06
  1.4719970E+06  1.4652210E+06  1.4584761E+06  1.4517622E+06
  1.4450794E+06  1.4384271E+06  1.4318056E+06  1.4252146E+06
  1.4186539E+06  1.4121234E+06  1.4056229E+06  1.3991524E+06
  1.3927116E+06  1.3863006E+06  1.3799190E+06  1.3735668E+06
  1.3672439E+06  1.3609500E+06  1.3546851E+06  1.3484490E+06
  1.3422418E+06  1.3360630E+06  1.3299126E+06  1.3237906E+06
  1.3176968E+06  1.3116310E+06  1.3055931E+06  1.2995831E+06
  1.2936008E+06  1.2876459E+06  1.2817185E+06  1.2758182E+06
  1.2699452E+06  1.2640994E+06  1.2582802E+06  1.2524880E+06
  1.2467224E+06  1.2409834E+06  1.2352708E+06  1.2295844E+06
  1.2239242E+06  1.2182901E+06  1.2126820E+06  1.2070996E+06
  1.2015429E+06  1.1960119E+06  1.1905062E+06  1.1850260E+06
  1.1795709E+06  1.1741410E+06  1.1687360E+06  1.1633560E+06
  1.1580006E+06  1.1526700E+06  1.1473639E+06  1.1420822E+06
  1.1368249E+06  1.1315918E+06  1.1263826E+06  1.1211975E+06
  1.1160364E+06  1.1108989E+06  1.1057850E+06  1.1006948E+06
  1.0956279E+06  1.0905844E+06  1.0855641E+06  1.0805669E+06
  1.0755928E+06  1.0706414E+06  1.0657129E+06  1.0608071E+06
  1.0559239E+06  1.0510631E+06  1.0462248E+06  1.0414086E+06
  1.0366148E+06  1.0318429E+06  1.0270930E+06  1.0223649E+06
  1.0176587E+06  1.0129741E+06  1.0083110E+06  1.0036694E+06
  9.9904925E+05  9.9445031E+05  9.8987250E+05  9.8531588E+05
  9.8078012E+05  9.7626525E+05  9.7177125E+05  9.6729788E+05
  9.6284506E+05  9.5841281E+05  9.5400094E+05  9.4960938E+05
  9.4523800E+05  9.4088675E+05  9.3655556E+05  9.3224431E+05
  9.2795288E+05  9.2368125E+05  9.1942925E+05  9.1519681E+05
  9.1098388E+05  9.0679038E+05  9.0261612E+05  8.9846106E+05
  8.9432519E+05  8.9020831E+05  8.8611038E+05  8.8203138E+05
  8.7797112E+05  8.7392950E+05  8.6990656E+05  8.6590212E+05
  8.6191606E+05  8.5794838E+05  8.5399900E+05  8.5006775E+05
  8.4615462E+05  8.4225950E+05  8.3838231E+05  8.3452300E+05
  8.3068144E+05  8.2685750E+05  8.2305125E+05  8.1926250E+05
  8.1549112E+05  8.1173719E+05  8.0800050E+05  8.0428100E+05
  8.0057869E+05  7.9689338E+05  7.9322500E+05  7.8957356E+05
  7.8593888E+05  7.8232100E+05  7.7871969E+05  7.7513500E+05
  7.7156681E+05  7.6801506E+05  7.6447962E+05  7.6096050E+05
  7.5745756E+05  7.5397075E+05  7.5050000E+05  7.4704519E+05
  7.4360631E+05  7.4018325E+05  7.3677594E+05  7.3338431E+05
  7.3000831E+05  7.2664788E+05  7.2330288E+05  7.1997331E+05
  7.1665900E+05  7.1336000E+05  7.1007619E+05  7.0680750E+05
  7.0355388E+05  7.0031519E+05  6.9709138E+05  6.9388244E+05
  6.9068831E+05  6.8750888E+05  6.8434400E+05  6.8119375E+05
  6.7805800E+05  6.7493669E+05  6.7182975E+05  6.6873712E+05
  6.6565869E+05  6.6259450E+05  6.5954438E+05  6.5650825E+05
  6.5348612E+05  6.5047794E+05  6.4748356E+05  6.4450300E+05
  6.4153612E+05  6.3858300E+05  6.3564338E+05  6.3271731E+05
  6.2980469E+05  6.2690550E+05  6.2401969E+05  6.2114712E+05
  6.1828775E+05  6.1544162E+05  6.1260850E+05  6.0978850E+05
  6.0698144E+05  6.0418731E+05  6.0140606E+05  5.9863762E+05
  5.9588188E+05  5.9313888E+05  5.9040844E+05  5.8769062E+05
  5.8498525E+05  5.8229244E+05  5.7961194E+05  5.7694381E+05
  5.7428794E+05  5.7164431E+05  5.6901288E+05  5.6639350E+05
  5.6378625E+05  5.6119094E+05  5.5860762E+05  5.5603612E+05
  5.5347656E+05  5.5092875E+05  5.4839262E+05  5.4586819E+05
  5.4335538E+05  5.4085412E+05  5.3836444E+05  5.3588619E+05
  5.3341931E+05  5.3096381E+05  5.2851962E+05  5.2608669E+05
  5.2366494E+05  5.2125434E+05  5.1885484E+05  5.1646641E+05
  5.1408894E+05  5.1172244E+05  5.0936681E+05  5.0702203E+05
  5.0468806E+05  5.0236481E+05  5.0005228E+05  4.9775038E+05
  4.9545906E+05  4.9317831E+05  4.9090806E+05  4.8864825E+05
  4.8639884E+05  4.8415981E+05  4.8193106E+05  4.7971259E+05
  4.7750431E+05  4.7530622E+05  4.7311822E+05  4.7094031E+05
  4.6877244E+05  4.6661453E+05  4.6446656E+05  4.6232847E+05
  4.6020022E+05  4.5808178E+05  4.5597306E+05  4.5387409E+05
  4.5178478E+05  4.4970506E+05  4.4763494E+05  4.4557431E+05
  4.4352319E+05  4.4148153E+05  4.3944925E+05  4.3742631E+05
  4.3541272E+05  4.3340838E+05  4.3141325E+05  4.2942731E+05
  4.2745053E+05  4.2548284E+05  4.2352422E+05  4.2157459E+05
  4.1963394E+05  4.1770225E+05  4.1577944E+05  4.1386547E+05
  4.1196031E+05  4.1006394E+05  4.0817628E+05  4.0629731E+05
  4.0442700E+05  4.0256531E+05  4.0071219E+05  3.9886756E+05
  3.9703144E+05  3.9520378E+05  3.9338456E+05  3.9157369E+05
  3.8977112E+05  3.8797691E+05  3.8619091E+05  3.8441316E+05
  3.8264356E+05  3.8088216E+05  3.7912881E+05  3.7738356E+05
  3.7564634E+05  3.7391716E+05  3.7219588E+05  3.7048256E+05
  3.6877709E+05  3.6707950E+05  3.6538972E+05  3.6370772E+05
  3.6203344E+05  3.6036691E+05  3.5870803E+05  3.5705678E+05
  3.5541312E+05  3.5377706E+05  3.5214850E+05  3.5052744E+05
  3.4891388E+05  3.4730769E+05  3.4570894E+05  3.4411753E+05
  3.4253344E+05  3.4095666E+05  3.3938712E+05  3.3782481E+05
  3.3626969E+05  3.3472175E+05  3.3318094E+05  3.3164719E+05
  3.3012050E+05  3.2860088E+05  3.2708819E+05  3.2558253E+05
  3.2408375E+05  3.2259191E+05  3.2110691E+05  3.1962875E+05
  3.1815741E+05  3.1669281E+05  3.1523497E+05  3.1378384E+05
  3.1233944E+05  3.1090162E+05  3.0947044E+05  3.0804584E+05
  3.0662781E+05  3.0521631E+05  3.0381131E+05  3.0241278E+05
  3.0102069E+05  2.9963497E+05  2.9825566E+05  2.9688269E+05
  2.9551606E+05  2.9415569E+05  2.9280159E+05  2.9145375E+05
  2.9011209E+05  2.8877662E+05  2.8744728E+05  2.8612406E+05
  2.8480694E+05  2.8349591E+05  2.8219088E+05  2.8089188E+05
  2.7959881E+05  2.7831175E+05  2.7703059E+05  2.7575531E+05
  2.7448594E+05  2.7322241E+05  2.7196469E+05  2.7071272E+05
  2.6946656E+05  2.6822612E+05  2.6699138E+05  2.6576234E+05
  2.6453894E+05  2.6332119E+05  2.6210905E+05  2.6090247E+05
  2.5970145E+05  2.5850597E+05  2.5731600E+05  2.5613147E+05
  2.5495242E+05  2.5377880E+05  2.5261058E+05  2.5144772E+05
  2.5029025E+05  2.4913808E+05  2.4799122E+05  2.4684962E+05
  2.4571331E+05  2.4458220E+05  2.4345631E+05  2.4233561E+05
  2.4122006E+05  2.4010966E+05  2.3900436E+05  2.3790414E+05
  2.3680900E+05  2.3571889E+05  2.3463380E+05  2.3355370E+05
  2.3247858E+05  2.3140841E+05  2.3034317E+05  2.2928283E+05
  2.2822736E+05  2.2717677E+05  2.2613100E+05  2.2509005E+05
  2.2405388E+05  2.2302250E+05  2.2199584E+05  2.2097394E+05
  2.1995672E+05  2.1894419E+05  2.1793631E+05  2.1693309E+05
  2.1593448E+05  2.1494047E+05  2.1395103E+05  2.1296614E+05
  2.1198580E+05  2.1100995E+05  2.1003861E+05  2.0907173E+05
  2.0810931E+05  2.0715131E+05  2.0619773E+05  2.0524855E+05
  2.0430372E+05  2.0336325E+05  2.0242709E+05  2.0149527E+05
  2.0056772E+05  1.9964444E+05  1.9872542E+05  1.9781062E+05
  1.9690003E+05  1.9599364E+05  1.9509142E+05  1.9419336E+05
  1.9329942E+05  1.9240961E+05  1.9152388E+05  1.9064223E+05
  1.8976466E+05  1.8889111E+05  1.8802158E+05  1.8715606E+05
  1.8629452E+05  1.8543694E+05  1.8458333E+05  1.8373362E+05
  1.8288784E+05  1.8204595E+05  1.8120794E+05  1.8037378E+05
  1.7954347E+05  1.7871697E+05  1.7789428E+05  1.7707538E+05
  1.7626023E+05  1.7544886E+05  1.7464122E+05  1.7383728E+05
  1.7303706E+05  1.7224052E+05  1.7144764E+05  1.7065841E+05
  1.6987281E+05  1.6909083E+05  1.6831245E+05  1.6753766E+05
  1.6676644E+05  1.6599875E+05  1.6523461E+05  1.6447398E+05
  1.6371686E+05  1.6296322E+05  1.6221305E+05  1.6146633E+05
  1.6072305E+05  1.5998319E+05  1.5924673E+05  1.5851367E+05
  1.5778398E+05  1.5705766E+05  1.5633467E+05  1.5561502E+05
  1.5489867E+05  1.5418562E+05  1.5347586E+05  1.5276936E+05
  1.5206611E+05  1.5136611E+05  1.5066931E+05  1.4997573E+05
  1.4928536E+05  1.4859814E+05  1.4791411E+05  1.4723320E+05
  1.4655544E+05  1.4588081E+05  1.4520927E+05  1.4454083E+05
  1.4387545E+05  1.4321316E+05  1.4255391E+05  1.4189767E+05
  1.4124448E+05  1.4059428E+05  1.3994708E+05  1.3930286E+05
  1.3866161E+05  1.3802331E+05  1.3738794E+05  1.3675550E+05
  1.3612597E+05  1.3549934E+05  1.3487559E+05  1.3425472E+05
  1.3363670E+05  1.3302153E+05  1.3240919E+05  1.3179967E+05
  1.3119295E+05  1.3058903E+05  1.2998789E+05  1.2938952E+05
  1.2879390E+05  1.2820102E+05  1.2761087E+05  1.2702344E+05
  1.2643870E+05  1.2585666E+05  1.2527731E+05  1.2470062E+05
  1.2412659E+05  1.2355519E+05  1.2298643E+05  1.2242028E+05
  1.2185674E+05  1.2129580E+05  1.2073744E+05  1.2018164E+05
  1.1962841E+05  1.1907772E+05  1.1852957E+05  1.1798394E+05
  1.1744082E+05  1.1690020E+05  1.1636208E+05  1.1582642E+05
  1.1529324E+05  1.1476251E+05  1.1423422E+05  1.1370837E+05
  1.1318493E+05  1.1266391E+05  1.1214527E+05  1.1162903E+05
  1.1111517E+05  1.1060367E+05  1.1009453E+05  1.0958773E+05
  1.0908327E+05  1.0858112E+05  1.0808128E+05  1.0758376E+05
  1.0708852E+05  1.0659555E+05  1.0610486E+05  1.0561642E+05
  1.0513023E+05  1.0464629E+05  1.0416457E+05  1.0368507E+05
  1.0320777E+05  1.0273267E+05  1.0225977E+05  1.0178903E+05
  1.0132046E+05  1.0085405E+05  1.0038979E+05  9.9927664E+04
  9.9467664E+04  9.9009781E+04  9.8554008E+04  9.8100336E+04
  9.7648750E+04  9.7199242E+04  9.6751805E+04  9.6306422E+04
  9.5863094E+04  9.5421805E+04  9.4982547E+04  9.4545312E+04
  9.4110094E+04  9.3676875E+04  9.3245648E+04  9.2816414E+04
  9.2389148E+04  9.1963852E+04  9.1540516E+04  9.1119125E+04
  9.0699672E+04  9.0282156E+04  8.9866555E+04  8.9452875E+04
  8.9041094E+04  8.8631211E+04  8.8223211E+04  8.7817094E+04
  8.7412844E+04  8.7010453E+04  8.6609914E+04  8.6211227E+04
  8.5814367E+04  8.5419336E+04  8.5026125E+04  8.4634719E+04
  8.4245125E+04  8.3857312E+04  8.3471297E+04  8.3087047E+04
  8.2704570E+04  8.2323859E+04  8.1944898E+04  8.1567680E+04
  8.1192195E+04  8.0818445E+04  8.0446406E+04  8.0076094E+04
  7.9707477E+04  7.9340555E+04  7.8975328E+04  7.8611781E+04
  7.8249906E+04  7.7889695E+04  7.7531141E+04  7.7174242E+04
  7.6818984E+04  7.6465359E+04  7.6113367E+04  7.5762992E+04
  7.5414234E+04  7.5067078E+04  7.4721523E+04  7.4377555E+04
  7.4035172E+04  7.3694367E+04  7.3355125E+04  7.3017453E+04
  7.2681328E+04  7.2346750E+04  7.2013719E+04  7.1682219E+04
  7.1352242E+04  7.1023781E+04  7.0696836E+04  7.0371398E+04
  7.0047461E+04  6.9725008E+04  6.9404039E+04  6.9084547E+04
  6.8766531E+04  6.8449977E+04  6.8134883E+04  6.7821234E+04
  6.7509031E+04  6.7198266E+04  6.6888930E+04  6.6581023E+04
  6.6274531E+04  6.5969445E+04  6.5665766E+04  6.5363488E+04
  6.5062602E+04  6.4763094E+04  6.4464969E+04  6.4168219E+04
  6.3872832E+04  6.3578805E+04  6.3286133E+04  6.2994805E+04
  6.2704820E+04  6.2416172E+04  6.2128852E+04  6.1842852E+04
  6.1558168E+04  6.1274797E+04  6.0992730E+04  6.0711961E+04
  6.0432484E+04  6.0154297E+04  5.9877387E+04  5.9601754E+04
  5.9327387E+04  5.9054281E+04  5.8782438E+04  5.8511844E+04
  5.8242496E+04  5.7974387E+04  5.7707512E+04  5.7441867E+04
  5.7177441E+04  5.6914238E+04  5.6652242E+04  5.6391453E+04
  5.6131867E+04  5.5873477E+04  5.5616273E+04  5.5360254E+04
  5.5105414E+04  5.4851746E+04  5.4599246E+04  5.4347906E+04
  5.4097727E+04  5.3848699E+04  5.3600816E+04  5.3354074E+04
  5.3108469E+04  5.2863992E+04  5.2620641E+04  5.2378414E+04
  5.2137301E+04  5.1897297E+04  5.1658395E+04  5.1420594E+04
  5.1183891E+04  5.0948273E+04  5.0713746E+04  5.0480293E+04
  5.0247914E+04  5.0016609E+04  4.9786367E+04  4.9557184E+04
  4.9329059E+04  4.9101980E+04  4.8875949E+04  4.8650957E+04
  4.8427000E+04  4.8204074E+04  4.7982176E+04  4.7761301E+04
  4.7541441E+04  4.7322594E+04  4.7104750E+04  4.6887914E+04
  4.6672074E+04  4.6457227E+04  4.6243371E+04  4.6030496E+04
  4.5818605E+04  4.5607688E+04  4.5397738E+04  4.5188762E+04
  4.4980742E+04  4.4773684E+04  4.4567574E+04  4.4362414E+04
  4.4158203E+04  4.3954926E+04  4.3752590E+04  4.3551184E+04
  4.3350703E+04  4.3151145E+04  4.2952508E+04  4.2754781E+04
  4.2557969E+04  4.2362062E+04  4.2167055E+04  4.1972949E+04
  4.1779734E+04  4.1587406E+04  4.1395969E+04  4.1205406E+04
  4.1015727E+04  4.0826922E+04  4.0638980E+04  4.0451906E+04
  4.0265691E+04  4.0080336E+04  3.9895836E+04  3.9712184E+04
  3.9529375E+04  3.9347406E+04  3.9166281E+04  3.8985984E+04
  3.8806520E+04  3.8627879E+04  3.8450066E+04  3.8273066E+04
  3.8096887E+04  3.7921512E+04  3.7746949E+04  3.7573188E+04
  3.7400227E+04  3.7228059E+04  3.7056688E+04  3.6886105E+04
  3.6716305E+04  3.6547289E+04  3.6379051E+04  3.6211586E+04
  3.6044891E+04  3.5878969E+04  3.5713805E+04  3.5549402E+04
  3.5385758E+04  3.5222863E+04  3.5060727E+04  3.4899328E+04
  3.4738676E+04  3.4578762E+04  3.4419586E+04  3.4261141E+04
  3.4103426E+04  3.3946438E+04  3.3790172E+04  3.3634625E+04
  3.3479797E+04  3.3325676E+04  3.3172266E+04  3.3019566E+04
  3.2867566E+04  3.2716266E+04  3.2565662E+04  3.2415752E+04
  3.2266533E+04  3.2118000E+04  3.1970150E+04  3.1822982E+04
  3.1676490E+04  3.1530672E+04  3.1385527E+04  3.1241051E+04
  3.1097238E+04  3.0954088E+04  3.0811598E+04  3.0669760E+04
  3.0528578E+04  3.0388045E+04  3.0248160E+04  3.0108918E+04
  2.9970318E+04  2.9832355E+04  2.9695027E+04  2.9558330E+04
  2.9422266E+04  2.9286824E+04  2.9152008E+04  2.9017812E+04
  2.8884234E+04  2.8751270E+04  2.8618920E+04  2.8487178E+04
  2.8356043E+04  2.8225510E+04  2.8095580E+04  2.7966248E+04
  2.7837510E+04  2.7709365E+04  2.7581811E+04  2.7454842E+04
  2.7328461E+04  2.7202658E+04  2.7077436E+04  2.6952789E+04
  2.6828717E+04  2.6705215E+04  2.6582283E+04  2.6459918E+04
  2.6338113E+04  2.6216869E+04  2.6096186E+04  2.5976057E+04
  2.5856480E+04  2.5737455E+04  2.5618977E+04  2.5501045E+04
  2.5383658E+04  2.5266807E+04  2.5143551E+04  2.5027797E+04
  2.4912580E+04  2.4797889E+04  2.4683725E+04  2.4570082E+04
  2.4456961E+04  2.4344357E+04  2.4232268E+04  2.4120688E+04
  2.4009617E+04  2.3899053E+04  2.3788992E+04  2.3679430E+04
  2.3570365E+04  2.3461795E+04  2.3353717E+04  2.3246129E+04
  2.3139025E+04  2.3032404E+04  2.2926266E+04  2.2820604E+04
  2.2715418E+04  2.2610705E+04  2.2506461E+04  2.2402684E+04
  2.2299373E+04  2.2196523E+04  2.2094133E+04  2.1992199E+04
  2.1890719E+04  2.1789691E+04  2.1689113E+04  2.1588980E+04
  2.1489293E+04  2.1390047E+04  2.1291238E+04  2.1192867E+04
  2.1094930E+04  2.0997426E+04  2.0900350E+04  2.0803699E+04
  2.0707475E+04  2.0611670E+04  2.0516287E+04  2.0421318E+04
  2.0326768E+04  2.0232627E+04  2.0138898E+04  2.0045576E+04
  1.9952658E+04  1.9860145E+04  1.9768033E+04  1.9676318E+04
  1.9585000E+04  1.9494076E+04  1.9403543E+04  1.9313400E+04
  1.9223645E+04  1.9134275E+04  1.9045287E+04  1.8956682E+04
  1.8868453E+04  1.8780602E+04  1.8693125E+04  1.8606020E+04
  1.8519285E+04  1.8432918E+04  1.8346918E+04  1.8261279E+04
  1.8176004E+04  1.8091088E+04  1.8006531E+04  1.7922328E+04
  1.7838480E+04  1.7754982E+04  1.7671836E+04  1.7589035E+04
  1.7506580E+04  1.7424471E+04  1.7342703E+04  1.7261273E+04
  1.7180184E+04  1.7099428E+04  1.7019008E+04  1.6938920E+04
  1.6859162E+04  1.6779732E+04  1.6700629E+04  1.6621852E+04
  1.6543398E+04  1.6465264E+04  1.6387449E+04  1.6309953E+04
  1.6232773E+04  1.6155906E+04  1.6079353E+04  1.6003108E+04
  1.5927174E+04  1.5851547E+04  1.5776225E+04  1.5701206E+04
  1.5626489E+04  1.5552073E+04  1.5477956E+04  1.5404136E+04
  1.5330610E+04  1.5257379E+04  1.5184440E+04  1.5111791E+04
  1.5039432E+04  1.4967359E+04  1.4895572E+04  1.4824070E+04
  1.4752850E+04  1.4681911E+04  1.4611252E+04  1.4540870E+04
  1.4470766E+04  1.4400936E+04  1.4331379E+04  1.4262095E+04
  1.4193081E+04  1.4124336E+04  1.4055858E+04  1.3987647E+04
  1.3919701E+04  1.3852018E+04  1.3784597E+04  1.3717436E+04
  1.3650533E+04  1.3583890E+04  1.3517502E+04  1.3451369E+04
  1.3385489E+04  1.3319862E+04  1.3254486E+04  1.3189360E+04
  1.3124481E+04  1.3059851E+04  1.2995465E+04  1.2931323E+04
  1.2867426E+04  1.2803770E+04  1.2740354E+04  1.2677178E+04
  1.2614239E+04  1.2551537E+04  1.2489072E+04  1.2426841E+04
  1.2364843E+04  1.2303076E+04  1.2241541E+04  1.2180236E+04
  1.2119159E+04  1.2058310E+04  1.1997686E+04  1.1937288E+04
  1.1877113E+04  1.1817162E+04  1.1757433E+04  1.1697923E+04
  1.1638634E+04  1.1579562E+04  1.1520709E+04  1.1462071E+04
  1.1403648E+04  1.1345440E+04  1.1287445E+04  1.1229663E+04
  1.1172091E+04  1.1114729E+04  1.1057577E+04  1.1000633E+04
  1.0943896E+04  1.0887364E+04  1.0831038E+04  1.0774916E+04
  1.0718997E+04  1.0663280E+04  1.0607766E+04  1.0552450E+04
  1.0497335E+04  1.0442419E+04  1.0387699E+04  1.0333177E+04
  1.0278851E+04  1.0224719E+04  1.0170781E+04  1.0117037E+04
  1.0063485E+04  1.0010125E+04  9.9569551E+03  9.9039746E+03
  9.8511836E+03  9.7985811E+03  9.7461660E+03  9.6939365E+03
  9.6418936E+03  9.5900361E+03  9.5383613E+03  9.4868711E+03
  9.4355635E+03  9.3844365E+03  9.3334922E+03  9.2827275E+03
  9.2321426E+03  9.1817363E+03  9.1315078E+03  9.0814570E+03
  9.0315840E+03  8.9818857E+03  8.9323633E+03  8.8830146E+03
  8.8338408E+03  8.7848398E+03  8.7360117E+03  8.6873555E+03
  8.6388711E+03  8.5905566E+03  8.5424121E+03  8.4944365E+03
  8.4466309E+03  8.3989922E+03  8.3515215E+03  8.3042168E+03
  8.2570791E+03  8.2101074E+03  8.1633003E+03  8.1166577E+03
  8.0701787E+03  8.0238633E+03  7.9777104E+03  7.9317197E+03
  7.8858906E+03  7.8402231E+03  7.7947153E+03  7.7493682E+03
  7.7041802E+03  7.6591514E+03  7.6142803E+03  7.5695679E+03
  7.5250127E+03  7.4806143E+03  7.4363721E+03  7.3922861E+03
  7.3483555E+03  7.3045796E+03  7.2609580E+03  7.2174907E+03
  7.1741768E+03  7.1310161E+03  7.0880083E+03  7.0451523E+03
  7.0024482E+03  6.9598950E+03  6.9174932E+03  6.8752417E+03
  6.8331401E+03  6.7911885E+03  6.7493857E+03  6.7077319E+03
  6.6662261E+03  6.6248687E+03  6.5836587E+03  6.5425962E+03
  6.5016802E+03  6.4609111E+03  6.4202881E+03  6.3798105E+03
  6.3394785E+03  6.2992915E+03  6.2592490E+03  6.2193511E+03
  6.1795972E+03  6.1399868E+03  6.1005195E+03  6.0611958E+03
  6.0220146E+03  5.9829756E+03  5.9440786E+03  5.9053237E+03
  5.8667100E+03  5.8282373E+03  5.7899053E+03  5.7517144E+03
  5.7136636E+03  5.6757524E+03  5.6379814E+03  5.6003496E+03
  5.5628569E+03  5.5255029E+03  5.4882876E+03  5.4512109E+03
  5.4142725E+03  5.3774712E+03  5.3408081E+03  5.3042822E+03
  5.2678931E+03  5.2316411E+03  5.1955259E+03  5.1595474E+03
  5.1237046E+03  5.0879976E+03  5.0524268E+03  5.0169917E+03
  4.9816914E+03  4.9465264E+03  4.9114961E+03  4.8766006E+03
  4.8418398E+03  4.8072134E+03  4.7727212E+03  4.7383623E+03
  4.7041377E+03  4.6700464E+03  4.6360884E+03  4.6022642E+03
  4.5685723E+03  4.5350137E+03  4.5015874E+03  4.4682939E+03
  4.4351328E+03  4.4021035E+03  4.3692070E+03  4.3364419E+03
  4.3038086E+03  4.2713071E+03  4.2389365E+03  4.2066978E+03
  4.1745898E+03  4.1426133E+03  4.1107676E+03  4.0790525E+03
  4.0474680E+03  4.0160139E+03  3.9846904E+03  3.9534971E+03
  3.9224338E+03  3.8915005E+03  3.8606973E+03  3.8300237E+03
  3.7994797E+03  3.7690654E+03  3.7387808E+03  3.7086250E+03
  3.6785986E+03  3.6487014E+03  3.6189333E+03  3.5892939E+03
  3.5597834E+03  3.5304021E+03  3.5011487E+03  3.4720242E+03
  3.4430283E+03  3.4141604E+03  3.3854209E+03  3.3568098E+03
  3.3283264E+03  3.2999714E+03  3.2717441E+03  3.2436448E+03
  3.2156733E+03  3.1878296E+03  3.1601130E+03  3.1325244E+03
  3.1050632E+03  3.0777292E+03  3.0505227E+03  3.0234436E+03
  2.9964915E+03  2.9696665E+03  2.9429688E+03  2.9163977E+03
  2.8899539E+03  2.8636365E+03  2.8374463E+03  2.8113826E+03
  2.7854456E+03  2.7596353E+03  2.7339512E+03  2.7083940E+03
  2.6829629E+03  2.6576584E+03  2.6324802E+03  2.6074280E+03
  2.5825022E+03  2.5577024E+03  2.5330288E+03  2.5084810E+03
  2.4840593E+03  2.4597634E+03  2.4355935E+03  2.4115493E+03
  2.3876306E+03  2.3638379E+03  2.3401707E+03  2.3166289E+03
  2.2932129E+03  2.2699221E+03  2.2467568E+03  2.2237168E+03
  2.2008020E+03  2.1780125E+03  2.1553481E+03  2.1328088E+03
  2.1103948E+03  2.0881055E+03  2.0659414E+03  2.0439019E+03
  2.0219873E+03  2.0001975E+03  1.9785323E+03  1.9569919E+03
  1.9355760E+03  1.9142845E+03  1.8931177E+03  1.8720751E+03
  1.8511569E+03  1.8303629E+03  1.8096931E+03  1.7891475E+03
  1.7687258E+03  1.7484282E+03  1.7282545E+03  1.7082047E+03
  1.6882787E+03  1.6684763E+03  1.6487976E+03  1.6292424E+03
  1.6098108E+03  1.5905026E+03  1.5713176E+03  1.5522559E+03
  1.5333174E+03  1.5145020E+03  1.4958096E+03  1.4772400E+03
  1.4587933E+03  1.4404694E+03  1.4222681E+03  1.4041893E+03
  1.3862332E+03  1.3683992E+03  1.3506876E+03  1.3330981E+03
  1.3156307E+03  1.2982853E+03  1.2810618E+03  1.2639601E+03
  1.2469800E+03  1.2301213E+03  1.2133842E+03  1.1967684E+03
  1.1802738E+03  1.1639003E+03  1.1476477E+03  1.1315160E+03
  1.1155050E+03  1.0996145E+03  1.0838446E+03  1.0681949E+03
  1.0526655E+03  1.0372562E+03  1.0219667E+03  1.0067971E+03
  9.9174701E+02  9.7681647E+02  9.6200525E+02  9.4731317E+02
  9.3274017E+02  9.1828607E+02  9.0395062E+02  8.8973376E+02
  8.7563525E+02  8.6165497E+02  8.4779272E+02  8.3404840E+02
  8.2042169E+02  8.0691254E+02  7.9352069E+02  7.8024597E+02
  7.6708820E+02  7.5404718E+02  7.4112274E+02  7.2831470E+02
  7.1562274E+02  7.0304675E+02  6.9058649E+02  6.7824176E+02
  6.6601233E+02  6.5389801E+02  6.4189856E+02  6.3001367E+02
  6.1824329E+02  6.0658704E+02  5.9504468E+02  5.8361609E+02
  5.7230090E+02  5.6109888E+02  5.5000983E+02  5.3903345E+02
  5.2816949E+02  5.1741772E+02  5.0677786E+02  4.9624957E+02
  4.8583264E+02  4.7552676E+02  4.6533167E+02  4.5524704E+02
  4.4527261E+02  4.3540808E+02  4.2565314E+02  4.1600748E+02
  4.0647076E+02  3.9704276E+02  3.8772305E+02  3.7851135E+02
  3.6940735E+02  3.6041071E+02  3.5152109E+02  3.4273813E+02
  3.3406146E+02  3.2549081E+02  3.1702579E+02  3.0866599E+02
  3.0041107E+02  2.9226068E+02  2.8421445E+02  2.7627194E+02
  2.6843286E+02  2.6069672E+02  2.5306320E+02  2.4553188E+02
  2.3810231E+02  2.3077414E+02  2.2354691E+02  2.1642023E+02
  2.0939365E+02  2.0246675E+02  1.9563908E+02  1.8891022E+02
  1.8227971E+02  1.7574709E+02  1.6931190E+02  1.6297371E+02
  1.5673201E+02  1.5058633E+02  1.4453619E+02  1.3858113E+02
  1.3272064E+02  1.2695421E+02  1.2128134E+02  1.1570153E+02
  1.1021426E+02  1.0481902E+02  9.9515259E+01  9.4302452E+01
  8.9180069E+01  8.4147568E+01  7.9204376E+01  7.4349953E+01
  6.9583733E+01  6.4905136E+01  6.0313595E+01  5.5808529E+01
  5.1389343E+01  4.7055447E+01  4.2806236E+01  3.8641102E+01
  3.4559433E+01  3.0560604E+01  2.6643995E+01  2.2808968E+01
  1.9054882E+01  1.5381090E+01  1.1786939E+01  8.2717667E+00
  4.8349085E+00  1.4756888E+00 -1.8065729E+00 -5.0125647E+00
 -8.1429806E+00 -1.1198523E+01 -1.4179899E+01 -1.7087826E+01
 -1.9923025E+01 -2.2686226E+01 -2.5378168E+01 -2.7999590E+01
 -3.0551250E+01 -3.3033901E+01 -3.5448311E+01 -3.7795250E+01
 -4.0075504E+01 -4.2289852E+01 -4.4439098E+01 -4.6524044E+01
 -4.8545494E+01 -5.0504269E+01 -5.2401192E+01 -5.4237103E+01
 -5.6012833E+01 -5.7729237E+01 -5.9387169E+01 -6.0987488E+01
 -6.2531071E+01 -6.4018799E+01 -6.5451553E+01 -6.6830231E+01
 -6.8155731E+01 -6.9428978E+01 -7.0650871E+01 -7.1822357E+01
 -7.2944359E+01 -7.4017822E+01 -7.5043701E+01 -7.6022957E+01
 -7.6956551E+01 -7.7845459E+01 -7.8690674E+01 -7.9493179E+01
 -8.0253983E+01 -8.0974091E+01 -8.1654526E+01 -8.2296310E+01
 -8.2900482E+01 -8.3468086E+01 -8.4000168E+01 -8.4497795E+01
 -8.4962036E+01 -8.5393967E+01 -8.5794678E+01 -8.6165260E+01
 -8.6506828E+01 -8.6820488E+01 -8.7107368E+01 -8.7368591E+01
 -8.7605309E+01 -8.7818657E+01 -8.8009811E+01 -8.8179924E+01
 -8.8330185E+01 -8.8461777E+01 -8.8575890E+01 -8.8673737E+01
 -8.8756523E+01 -8.8825478E+01 -8.8881828E+01 -8.8926819E+01
 -8.8961708E+01 -8.8987747E+01 -8.9006218E+01 -8.9018387E+01
 -8.9025558E+01 -8.9029015E+01 -8.9030083E+01 -8.9040199E+01
 -8.9039642E+01 -8.9038559E+01 -8.9036964E+01 -8.9034851E+01
 -8.9032219E+01 -8.9029076E+01 -8.9025421E+01 -8.9021255E+01
 -8.9016579E+01 -8.9011391E+01 -8.9005692E+01 -8.8999496E+01
 -8.8992790E+01 -8.8985573E+01 -8.8977859E+01 -8.8969643E+01
 -8.8960922E+01 -8.8951706E+01 -8.8941994E+01 -8.8931778E+01
 -8.8921066E+01 -8.8909866E+01 -8.8898170E+01 -8.8885979E+01
 -8.8873299E+01 -8.8860123E+01 -8.8846466E+01 -8.8832314E+01
 -8.8817680E+01 -8.8802559E+01 -8.8786949E+01 -8.8770866E+01
 -8.8754295E+01 -8.8737244E+01 -8.8719711E+01 -8.8701706E+01
 -8.8683220E+01 -8.8664261E+01 -8.8644821E+01 -8.8624916E+01
 -8.8604530E+01 -8.8583679E+01 -8.8562355E+01 -8.8540565E+01
 -8.8518303E+01 -8.8495583E+01 -8.8472389E+01 -8.8448730E+01
 -8.8424614E+01 -8.8400032E+01 -8.8374992E+01 -8.8349495E+01
 -8.8323540E+01 -8.8297127E+01 -8.8270256E+01 -8.8242928E+01
 -8.8215149E+01 -8.8186920E+01 -8.8158241E+01 -8.8129112E+01
 -8.8099533E+01 -8.8069504E+01 -8.8039032E+01 -8.8008110E+01
 -8.7976753E+01 -8.7944946E+01 -8.7912697E+01 -8.7880013E+01
 -8.7846893E+01 -8.7813324E+01 -8.7779327E+01 -8.7744888E+01
 -8.7710022E+01 -8.7674721E+01 -8.7638985E+01 -8.7602814E+01
 -8.7566223E+01 -8.7529198E+01 -8.7491745E+01 -8.7453873E+01
 -8.7415573E+01 -8.7376846E+01 -8.7337692E+01 -8.7298126E+01
 -8.7258141E+01 -8.7217728E+01 -8.7176903E+01 -8.7135658E+01
 -8.7094002E+01 -8.7051933E+01 -8.7009445E+01 -8.6966553E+01
 -8.6923241E+01 -8.6879524E+01 -8.6835403E+01 -8.6790871E+01
 -8.6745934E+01 -8.6700592E+01 -8.6654846E+01 -8.6608696E+01
 -8.6562149E+01 -8.6515198E+01 -8.6467850E+01 -8.6420105E+01
 -8.6371964E+01 -8.6323425E+01 -8.6274498E+01 -8.6225174E+01
 -8.6175461E+01 -8.6125359E+01 -8.6074860E+01 -8.6023979E+01
 -8.5972710E+01 -8.5921051E+01 -8.5869019E+01 -8.5816589E+01
 -8.5763786E+01 -8.5710602E+01 -8.5657036E+01 -8.5603096E+01
 -8.5548767E+01 -8.5494072E+01 -8.5439003E+01 -8.5383553E+01
 -8.5327736E+01 -8.5271545E+01 -8.5214989E+01 -8.5158058E+01
 -8.5100761E+01 -8.5043098E+01 -8.4985069E+01 -8.4926674E+01
 -8.4867920E+01 -8.4808800E+01 -8.4749321E+01 -8.4689484E+01
 -8.4629288E+01 -8.4568733E+01 -8.4507820E+01 -8.4446556E+01
 -8.4384941E+01 -8.4322968E+01 -8.4260651E+01 -8.4197975E+01
 -8.4134956E+01 -8.4071587E+01 -8.4007874E+01 -8.3943810E+01
 -8.3879410E+01 -8.3814659E+01 -8.3749573E+01 -8.3684143E+01
 -8.3618378E+01 -8.3552269E+01 -8.3485825E+01 -8.3419044E+01
 -8.3351929E+01 -8.3284485E+01 -8.3216705E+01 -8.3148598E+01
 -8.3080154E+01 -8.3011391E+01 -8.2942291E+01 -8.2872871E+01
 -8.2803123E+01 -8.2733047E+01 -8.2662659E+01 -8.2591942E+01
 -8.2520905E+01 -8.2449547E+01 -8.2377876E+01 -8.2305885E+01
 -8.2233582E+01 -8.2160965E+01 -8.2088028E+01 -8.2014786E+01
 -8.1941231E+01 -8.1867363E+01 -8.1793190E+01 -8.1718712E+01
 -8.1643929E+01 -8.1568832E+01 -8.1493439E+01 -8.1417740E+01
 -8.1341743E+01 -8.1265442E+01 -8.1188843E+01 -8.1111946E+01
 -8.1034752E+01 -8.0957268E+01 -8.0879486E+01 -8.0801407E+01
 -8.0723045E+01 -8.0644386E+01 -8.0565437E+01 -8.0486206E+01
 -8.0406677E+01 -8.0326874E+01 -8.0246780E+01 -8.0166405E+01
 -8.0085747E+01 -8.0004807E+01 -7.9923584E+01 -7.9842087E+01
 -7.9760315E+01 -7.9678261E+01 -7.9595932E+01 -7.9513329E+01
 -7.9430458E+01 -7.9347313E+01 -7.9263893E+01 -7.9180206E+01
 -7.9096252E+01 -7.9012032E+01 -7.8927551E+01 -7.8842796E+01
 -7.8757782E+01 -7.8672508E+01 -7.8586975E+01 -7.8501175E+01
 -7.8415123E+01 -7.8328804E+01 -7.8242241E+01 -7.8155418E+01
 -7.8068336E+01 -7.7981010E+01 -7.7893425E+01 -7.7805595E+01
 -7.7717514E+01 -7.7629189E+01 -7.7540611E+01 -7.7451790E+01
 -7.7362724E+01 -7.7273415E+01 -7.7183868E+01 -7.7094078E+01
 -7.7004051E+01 -7.6913780E+01 -7.6823273E+01 -7.6732529E+01
 -7.6641556E+01 -7.6550346E+01 -7.6458900E+01 -7.6367226E+01
 -7.6275322E+01 -7.6183189E+01 -7.6090836E+01 -7.5998245E+01
 -7.5905434E+01 -7.5812401E+01 -7.5719139E+01 -7.5625656E+01
 -7.5531952E+01 -7.5438034E+01 -7.5343895E+01 -7.5249542E+01
 -7.5154968E+01 -7.5060181E+01 -7.4965179E+01 -7.4869972E+01
 -7.4774544E+01 -7.4678917E+01 -7.4583076E+01 -7.4487022E+01
 -7.4390770E+01 -7.4294312E+01 -7.4197647E+01 -7.4100777E+01
 -7.4003716E+01 -7.3906441E+01 -7.3808975E+01 -7.3711311E+01
 -7.3613449E+01 -7.3515388E+01 -7.3417137E+01 -7.3318687E+01
 -7.3220055E+01 -7.3121223E+01 -7.3022202E+01 -7.2922997E+01
 -7.2823608E+01 -7.2724022E+01 -7.2624260E+01 -7.2524307E+01
 -7.2424179E+01 -7.2323868E+01 -7.2223373E+01 -7.2122704E+01
 -7.2021851E+01 -7.1920830E+01 -7.1819626E+01 -7.1718246E+01
 -7.1616699E+01 -7.1514977E+01 -7.1413094E+01 -7.1311028E+01
 -7.1208801E+01 -7.1106407E+01 -7.1003845E+01 -7.0901115E+01
 -7.0798225E+01 -7.0695175E+01 -7.0591957E+01 -7.0488586E+01
 -7.0385056E+01 -7.0281364E+01 -7.0177521E+01 -7.0073517E+01
 -6.9969360E+01 -6.9865051E+01 -6.9760590E+01 -6.9655983E+01
 -6.9551224E+01 -6.9446312E+01 -6.9341263E+01 -6.9236061E+01
 -6.9130714E+01 -6.9025223E+01 -6.8919594E+01 -6.8813828E+01
 -6.8707916E+01 -6.8601868E+01 -6.8495674E+01 -6.8389351E+01
 -6.8282898E+01 -6.8176300E+01 -6.8069580E+01 -6.7962723E+01
 -6.7855736E+01 -6.7748619E+01 -6.7641380E+01 -6.7534004E+01
 -6.7426514E+01 -6.7318893E+01 -6.7211151E+01 -6.7103279E+01
 -6.6995300E+01 -6.6887192E+01 -6.6778969E+01 -6.6670624E+01
 -6.6562172E+01 -6.6453598E+01 -6.6344917E+01 -6.6236115E+01
 -6.6127205E+01 -6.6018188E+01 -6.5909058E+01 -6.5799828E+01
 -6.5690483E+01 -6.5581032E+01 -6.5471481E+01 -6.5361824E+01
 -6.5252075E+01 -6.5142212E+01 -6.5032257E+01 -6.4922203E+01
 -6.4812050E+01 -6.4701805E+01 -6.4591461E+01 -6.4481026E+01
 -6.4370499E+01 -6.4259880E+01 -6.4149170E+01 -6.4038376E+01
 -6.3927490E+01 -6.3816521E+01 -6.3705463E+01 -6.3594322E+01
 -6.3483101E+01 -6.3371796E+01 -6.3260410E+01 -6.3148949E+01
 -6.3037403E+01 -6.2925785E+01 -6.2814091E+01 -6.2702324E+01
 -6.2590481E+01 -6.2478569E+01 -6.2366581E+01 -6.2254528E+01
 -6.2142403E+01 -6.2030212E+01 -6.1917953E+01 -6.1805634E+01
 -6.1693249E+01 -6.1580799E+01 -6.1468292E+01 -6.1355724E+01
 -6.1243095E+01 -6.1130409E+01 -6.1017666E+01 -6.0904869E+01
 -6.0792015E+01 -6.0679108E+01 -6.0566151E+01 -6.0453144E+01
 -6.0340084E+01 -6.0226978E+01 -6.0113827E+01 -6.0000626E+01
 -5.9887383E+01 -5.9774094E+01 -5.9660767E+01 -5.9547394E+01
 -5.9433987E+01 -5.9320534E+01 -5.9207047E+01 -5.9093525E+01
 -5.8979965E+01 -5.8866371E+01 -5.8752747E+01 -5.8639088E+01
 -5.8525398E+01 -5.8411682E+01 -5.8297939E+01 -5.8184166E+01
 -5.8070366E+01 -5.7956547E+01 -5.7842701E+01 -5.7728828E+01
 -5.7614941E+01 -5.7501034E+01 -5.7387104E+01 -5.7273159E+01
 -5.7159199E+01 -5.7045223E+01 -5.6931232E+01 -5.6817230E+01
 -5.6703217E+01 -5.6589191E+01 -5.6475159E+01 -5.6361115E+01
 -5.6247066E+01 -5.6133011E+01 -5.6018955E+01 -5.5904896E+01
 -5.5790829E+01 -5.5676769E+01 -5.5562702E+01 -5.5448639E+01
 -5.5334579E+01 -5.5220524E+01 -5.5106476E+01 -5.4992432E+01
 -5.4878395E+01 -5.4764366E+01 -5.4650349E+01 -5.4536343E+01
 -5.4422348E+01 -5.4308369E+01 -5.4194401E+01 -5.4080448E+01
 -5.3966518E+01 -5.3852604E+01 -5.3738705E+01 -5.3624828E+01
 -5.3510979E+01 -5.3397148E+01 -5.3283340E+01 -5.3169559E+01
 -5.3055805E+01 -5.2942078E+01 -5.2828381E+01 -5.2714714E+01
 -5.2601074E+01 -5.2487469E+01 -5.2373901E+01 -5.2260365E+01
 -5.2146866E+01 -5.2033401E+01 -5.1919979E+01 -5.1806595E+01
 -5.1693253E+01 -5.1579948E+01 -5.1466694E+01 -5.1353477E+01
 -5.1240307E+01 -5.1127186E+01 -5.1014114E+01 -5.0901089E+01
 -5.0788113E+01 -5.0675190E+01 -5.0562321E+01 -5.0449501E+01
 -5.0336742E+01 -5.0224037E+01 -5.0111389E+01 -4.9998798E+01
 -4.9886269E+01 -4.9773800E+01 -4.9661396E+01 -4.9549053E+01
 -4.9436771E+01 -4.9324558E+01 -4.9212414E+01 -4.9100338E+01
 -4.8988327E+01 -4.8876389E+01 -4.8764523E+01 -4.8652729E+01
 -4.8541012E+01 -4.8429367E+01 -4.8317799E+01 -4.8206306E+01
 -4.8094898E+01 -4.7983566E+01 -4.7872314E+01 -4.7761147E+01
 -4.7650063E+01 -4.7539062E+01 -4.7428150E+01 -4.7317322E+01
 -4.7206585E+01 -4.7095936E+01 -4.6985378E+01 -4.6874908E+01
 -4.6764538E+01 -4.6654259E+01 -4.6544075E+01 -4.6433987E+01
 -4.6323997E+01 -4.6214108E+01 -4.6104317E+01 -4.5994629E+01
 -4.5885044E+01 -4.5775558E+01 -4.5666183E+01 -4.5556911E+01
 -4.5447746E+01 -4.5338692E+01 -4.5229744E+01 -4.5120911E+01
 -4.5012188E+01 -4.4903576E+01 -4.4795082E+01 -4.4686703E+01
 -4.4578442E+01 -4.4470295E+01 -4.4362267E+01 -4.4254364E+01
 -4.4146580E+01 -4.4038918E+01 -4.3931381E+01 -4.3823967E+01
 -4.3716682E+01 -4.3609524E+01 -4.3502495E+01 -4.3395596E+01
 -4.3288826E+01 -4.3182190E+01 -4.3075687E+01 -4.2969318E+01
 -4.2863087E+01 -4.2756989E+01 -4.2651031E+01 -4.2545212E+01
 -4.2439533E+01 -4.2334000E+01 -4.2228607E+01 -4.2123356E+01
 -4.2018253E+01 -4.1913296E+01 -4.1808487E+01 -4.1703827E+01
 -4.1599316E+01 -4.1494957E+01 -4.1390751E+01 -4.1286701E+01
 -4.1182800E+01 -4.1079056E+01 -4.0975471E+01 -4.0872047E+01
 -4.0768780E+01 -4.0665672E+01 -4.0562729E+01 -4.0459946E+01
 -4.0357330E+01 -4.0254879E+01 -4.0152592E+01 -4.0050476E+01
 -3.9948528E+01 -3.9846748E+01 -3.9745144E+01 -3.9643711E+01
 -3.9542450E+01 -3.9441368E+01 -3.9340458E+01 -3.9239727E+01
 -3.9139172E+01 -3.9038799E+01 -3.8938610E+01 -3.8838600E+01
 -3.8738773E+01 -3.8639130E+01 -3.8539677E+01 -3.8440407E+01
 -3.8341324E+01 -3.8242432E+01 -3.8143730E+01 -3.8045219E+01
 -3.7946903E+01 -3.7848778E+01 -3.7750851E+01 -3.7653118E+01
 -3.7555584E+01 -3.7458248E+01 -3.7361115E+01 -3.7264179E+01
 -3.7167446E+01 -3.7070919E+01 -3.6974594E+01 -3.6878479E+01
 -3.6782566E+01 -3.6686867E+01 -3.6591370E+01 -3.6496086E+01
 -3.6401016E+01 -3.6306160E+01 -3.6211517E+01 -3.6117088E+01
 -3.6022877E+01 -3.5928886E+01 -3.5835110E+01 -3.5741554E+01
 -3.5648220E+01 -3.5555111E+01 -3.5462223E+01 -3.5369560E+01
 -3.5277126E+01 -3.5184914E+01 -3.5092934E+01 -3.5001186E+01
 -3.4909664E+01 -3.4818378E+01 -3.4727322E+01 -3.4636501E+01
 -3.4545918E+01 -3.4455570E+01 -3.4365459E+01 -3.4275589E+01
 -3.4185959E+01 -3.4096569E+01 -3.4007423E+01 -3.3918522E+01
 -3.3829861E+01 -3.3741451E+01 -3.3653286E+01 -3.3565372E+01
 -3.3477707E+01 -3.3390293E+01 -3.3303131E+01 -3.3216221E+01
 -3.3129570E+01 -3.3043171E+01 -3.2957031E+01 -3.2871147E+01
 -3.2786461E+01 -3.2701099E+01 -3.2615993E+01 -3.2531147E+01
 -3.2446560E+01 -3.2362228E+01 -3.2278152E+01 -3.2194328E+01
 -3.2110764E+01 -3.2027451E+01 -3.1944387E+01 -3.1861574E+01
 -3.1779015E+01 -3.1696705E+01 -3.1614643E+01 -3.1532827E+01
 -3.1451258E+01 -3.1369938E+01 -3.1288860E+01 -3.1208027E+01
 -3.1127439E+01 -3.1047092E+01 -3.0966988E+01 -3.0887125E+01
 -3.0807503E+01 -3.0728117E+01 -3.0648972E+01 -3.0570065E+01
 -3.0491396E+01 -3.0412960E+01 -3.0334763E+01 -3.0256798E+01
 -3.0179066E+01 -3.0101568E+01 -3.0024303E+01 -2.9947268E+01
 -2.9870462E+01 -2.9793888E+01 -2.9717543E+01 -2.9641424E+01
 -2.9565535E+01 -2.9489872E+01 -2.9414434E+01 -2.9339222E+01
 -2.9264233E+01 -2.9189468E+01 -2.9114925E+01 -2.9040606E+01
 -2.8966507E+01 -2.8892628E+01 -2.8818970E+01 -2.8745529E+01
 -2.8672310E+01 -2.8599304E+01 -2.8526518E+01 -2.8453947E+01
 -2.8381590E+01 -2.8309450E+01 -2.8237522E+01 -2.8165808E+01
 -2.8094305E+01 -2.8023014E+01 -2.7951937E+01 -2.7881067E+01
 -2.7810408E+01 -2.7739958E+01 -2.7669716E+01 -2.7599680E+01
 -2.7529852E+01 -2.7460230E+01 -2.7390812E+01 -2.7321600E+01
 -2.7252590E+01 -2.7183784E+01 -2.7115183E+01 -2.7046783E+01
 -2.6978582E+01 -2.6910585E+01 -2.6842785E+01 -2.6775185E+01
 -2.6707785E+01 -2.6640579E+01 -2.6573574E+01 -2.6506765E+01
 -2.6440149E+01 -2.6373732E+01 -2.6307507E+01 -2.6241478E+01
 -2.6175642E+01 -2.6109997E+01 -2.6044544E+01 -2.5979284E+01
 -2.5914215E+01 -2.5849335E+01 -2.5784643E+01 -2.5720140E+01
 -2.5655827E+01 -2.5591703E+01 -2.5527763E+01 -2.5464010E+01
 -2.5400442E+01 -2.5337061E+01 -2.5273863E+01 -2.5210848E+01
 -2.5148018E+01 -2.5085369E+01 -2.5022903E+01 -2.4960617E+01
 -2.4898514E+01 -2.4836590E+01 -2.4774847E+01 -2.4713282E+01
 -2.4651894E+01 -2.4590685E+01 -2.4529654E+01 -2.4468800E+01
 -2.4408119E+01 -2.4347616E+01 -2.4287289E+01 -2.4227133E+01
 -2.4167152E+01 -2.4107346E+01 -2.4047710E+01 -2.3988249E+01
 -2.3928957E+01 -2.3869837E+01 -2.3810886E+01 -2.3752108E+01
 -2.3693495E+01 -2.3635054E+01 -2.3576778E+01 -2.3518673E+01
 -2.3460733E+01 -2.3402960E+01 -2.3345352E+01 -2.3287910E+01
 -2.3230633E+01 -2.3173521E+01 -2.3116571E+01 -2.3059786E+01
 -2.3003162E+01 -2.2946701E+01 -2.2890402E+01 -2.2834265E+01
 -2.2778286E+01 -2.2722469E+01 -2.2666811E+01 -2.2611311E+01
 -2.2555971E+01 -2.2500788E+01 -2.2445763E+01 -2.2390894E+01
 -2.2336182E+01 -2.2281626E+01 -2.2227224E+01 -2.2172979E+01
 -2.2118889E+01 -2.2064951E+01 -2.2011166E+01 -2.1957535E+01
 -2.1904057E+01 -2.1850729E+01 -2.1797554E+01 -2.1744530E+01
 -2.1691654E+01 -2.1638931E+01 -2.1586355E+01 -2.1533930E+01
 -2.1481653E+01 -2.1429523E+01 -2.1377541E+01 -2.1325706E+01
 -2.1274019E+01 -2.1222477E+01 -2.1171080E+01 -2.1119829E+01
 -2.1068722E+01 -2.1017759E+01 -2.0966940E+01 -2.0916265E+01
 -2.0865732E+01 -2.0815342E+01 -2.0765095E+01 -2.0714987E+01
 -2.0665022E+01 -2.0615196E+01 -2.0565512E+01 -2.0515966E+01
 -2.0466560E+01 -2.0417292E+01 -2.0368164E+01 -2.0319172E+01
 -2.0270317E+01 -2.0221601E+01 -2.0173021E+01 -2.0124577E+01
 -2.0076267E+01 -2.0028093E+01 -1.9980055E+01 -1.9932152E+01
 -1.9884380E+01 -1.9836744E+01 -1.9789240E+01 -1.9741869E+01
 -1.9694632E+01 -1.9647524E+01 -1.9600548E+01 -1.9553703E+01
 -1.9506990E+01 -1.9460405E+01 -1.9413952E+01 -1.9367628E+01
 -1.9321432E+01 -1.9275364E+01 -1.9229425E+01 -1.9183613E+01
 -1.9137930E+01 -1.9092371E+01 -1.9046940E+01 -1.9001635E+01
 -1.8956457E+01 -1.8911402E+01 -1.8866474E+01 -1.8821669E+01
 -1.8776989E+01 -1.8732431E+01 -1.8687998E+01 -1.8643688E+01
 -1.8599499E+01 -1.8555433E+01 -1.8511490E+01 -1.8467667E+01
 -1.8423965E+01 -1.8380384E+01 -1.8336922E+01 -1.8293581E+01
 -1.8250360E+01 -1.8207256E+01 -1.8164272E+01 -1.8121408E+01
 -1.8078659E+01 -1.8036030E+01 -1.7993517E+01 -1.7951122E+01
 -1.7908842E+01 -1.7866678E+01 -1.7824631E+01 -1.7782700E+01
 -1.7740883E+01 -1.7699181E+01 -1.7657593E+01 -1.7616117E+01
 -1.7574757E+01 -1.7533510E+01 -1.7492376E+01 -1.7451355E+01
 -1.7410444E+01 -1.7369646E+01 -1.7328960E+01 -1.7288385E+01
 -1.7247921E+01 -1.7207567E+01 -1.7167324E+01 -1.7127190E+01
 -1.7087166E+01 -1.7047249E+01 -1.7007442E+01 -1.6967745E+01
 -1.6928154E+01 -1.6888672E+01 -1.6849297E+01 -1.6810028E+01
 -1.6770866E+01 -1.6731812E+01 -1.6692863E+01 -1.6654020E+01
 -1.6615282E+01 -1.6576649E+01 -1.6538122E+01 -1.6499699E+01
 -1.6461378E+01 -1.6423162E+01 -1.6385050E+01 -1.6347042E+01
 -1.6309135E+01 -1.6271332E+01 -1.6233631E+01 -1.6196032E+01
 -1.6158533E+01 -1.6121136E+01 -1.6083839E+01 -1.6046644E+01
 -1.6009550E+01 -1.5972555E+01 -1.5935660E+01 -1.5898864E+01
 -1.5862167E+01 -1.5825569E+01 -1.5789070E+01 -1.5752668E+01
 -1.5716366E+01 -1.5680160E+01 -1.5644051E+01 -1.5608039E+01
 -1.5572124E+01 -1.5536305E+01 -1.5500584E+01 -1.5464956E+01
 -1.5429425E+01 -1.5393990E+01 -1.5358648E+01 -1.5323402E+01
 -1.5288250E+01 -1.5253192E+01 -1.5218227E+01 -1.5183356E+01
 -1.5148579E+01 -1.5113894E+01 -1.5079302E+01 -1.5044803E+01
 -1.5010394E+01 -1.4976078E+01 -1.4941854E+01 -1.4907721E+01
 -1.4873678E+01 -1.4839726E+01 -1.4805865E+01 -1.4772094E+01
 -1.4738413E+01 -1.4704821E+01 -1.4671318E+01 -1.4637905E+01
 -1.4604580E+01 -1.4571343E+01 -1.4538196E+01 -1.4505136E+01
 -1.4472163E+01 -1.4439279E+01 -1.4406480E+01 -1.4373769E+01
 -1.4341145E+01 -1.4308607E+01 -1.4276155E+01 -1.4243789E+01
 -1.4211508E+01 -1.4179313E+01 -1.4147203E+01 -1.4115177E+01
 -1.4083237E+01 -1.4051380E+01 -1.4019608E+01 -1.3987919E+01
 -1.3956314E+01 -1.3924792E+01 -1.3893353E+01 -1.3861998E+01
 -1.3830724E+01 -1.3799533E+01 -1.3768423E+01 -1.3737395E+01
 -1.3706450E+01 -1.3675585E+01 -1.3644802E+01 -1.3614099E+01
 -1.3583477E+01 -1.3552936E+01 -1.3522473E+01 -1.3492091E+01
 -1.3461789E+01 -1.3431566E+01 -1.3401423E+01 -1.3371358E+01
 -1.3341372E+01 -1.3311463E+01 -1.3281634E+01 -1.3251883E+01
 -1.3222209E+01 -1.3192613E+01 -1.3163093E+01 -1.3133651E+01
 -1.3104285E+01 -1.3074997E+01 -1.3045784E+01 -1.3016648E+01
 -1.2987588E+01 -1.2958603E+01 -1.2929693E+01 -1.2900860E+01
 -1.2872100E+01 -1.2843416E+01 -1.2814806E+01 -1.2786271E+01
 -1.2757810E+01 -1.2729422E+01 -1.2701108E+01 -1.2672868E+01
 -1.2644701E+01 -1.2616607E+01 -1.2588585E+01 -1.2560637E+01
 -1.2532760E+01 -1.2504955E+01 -1.2477223E+01 -1.2449563E+01
 -1.2421974E+01 -1.2394456E+01 -1.2367009E+01 -1.2339634E+01
 -1.2312328E+01 -1.2285094E+01 -1.2257930E+01 -1.2230835E+01
 -1.2203811E+01 -1.2176856E+01 -1.2149970E+01 -1.2123155E+01
 -1.2096407E+01 -1.2069729E+01 -1.2043119E+01 -1.2016578E+01
 -1.1990105E+01 -1.1963699E+01 -1.1937363E+01 -1.1911093E+01
 -1.1884891E+01 -1.1858756E+01 -1.1832687E+01 -1.1806686E+01
 -1.1780752E+01 -1.1754884E+01 -1.1729082E+01 -1.1703346E+01
 -1.1677676E+01 -1.1652072E+01 -1.1626534E+01 -1.1601060E+01
 -1.1575651E+01 -1.1550308E+01 -1.1525029E+01 -1.1499815E+01
 -1.1474665E+01 -1.1449579E+01 -1.1424558E+01 -1.1399599E+01
 -1.1374705E+01 -1.1349874E+01 -1.1325106E+01 -1.1300402E+01
 -1.1275760E+01 -1.1251180E+01 -1.1226663E+01 -1.1202209E+01
 -1.1177816E+01 -1.1153485E+01 -1.1129217E+01 -1.1105010E+01
 -1.1080864E+01 -1.1056780E+01 -1.1032756E+01 -1.1008794E+01
 -1.0984892E+01 -1.0961051E+01 -1.0937270E+01 -1.0913549E+01
 -1.0889888E+01 -1.0866287E+01 -1.0842746E+01 -1.0819264E+01
 -1.0795841E+01 -1.0772478E+01 -1.0749173E+01 -1.0725928E+01
 -1.0702741E+01 -1.0679612E+01 -1.0656542E+01 -1.0633530E+01
 -1.0610576E+01 -1.0587680E+01 -1.0564840E+01 -1.0542059E+01
 -1.0519335E+01 -1.0496668E+01 -1.0474058E+01 -1.0451506E+01
 -1.0429008E+01 -1.0406569E+01 -1.0384185E+01 -1.0361857E+01
 -1.0339586E+01 -1.0317370E+01 -1.0295210E+01 -1.0273106E+01
 -1.0251057E+01 -1.0229062E+01 -1.0207123E+01 -1.0185239E+01
 -1.0163410E+01 -1.0141635E+01 -1.0119914E+01 -1.0098248E+01
 -1.0076636E+01 -1.0055078E+01 -1.0033574E+01 -1.0012123E+01
 -9.9907255E+00 -9.9693813E+00 -9.9480906E+00 -9.9268532E+00
 -9.9056683E+00 -9.8845367E+00 -9.8634567E+00 -9.8424301E+00
 -9.8214550E+00 -9.8005323E+00 -9.7796621E+00 -9.7588434E+00
 -9.7380762E+00 -9.7173595E+00 -9.6966963E+00 -9.6760826E+00
 -9.6555214E+00 -9.6350098E+00 -9.6145496E+00 -9.5941401E+00
 -9.5737820E+00 -9.5534735E+00 -9.5332146E+00 -9.5130072E+00
 -9.4928484E+00 -9.4727402E+00 -9.4526815E+00 -9.4326715E+00
 -9.4127121E+00 -9.3928013E+00 -9.3729401E+00 -9.3531275E+00
 -9.3333645E+00 -9.3136492E+00 -9.2939835E+00 -9.2743654E+00
 -9.2547951E+00 -9.2352743E+00 -9.2158003E+00 -9.1963749E+00
 -9.1769972E+00 -9.1576672E+00 -9.1383848E+00 -9.1191492E+00
 -9.0999613E+00 -9.0808201E+00 -9.0617256E+00 -9.0426788E+00
 -9.0236778E+00 -9.0047245E+00 -8.9858170E+00 -8.9669552E+00
 -8.9481401E+00 -8.9293709E+00 -8.9106483E+00 -8.8919706E+00
 -8.8733397E+00 -8.8547525E+00 -8.8362122E+00 -8.8177166E+00
 -8.7992668E+00 -8.7808609E+00 -8.7625008E+00 -8.7441854E+00
 -8.7259140E+00 -8.7076874E+00 -8.6895056E+00 -8.6713676E+00
 -8.6532745E+00 -8.6352243E+00 -8.6172190E+00 -8.5992575E+00
 -8.5813389E+00 -8.5634642E+00 -8.5456333E+00 -8.5278454E+00
 -8.5101004E+00 -8.4923992E+00 -8.4747400E+00 -8.4571238E+00
 -8.4395504E+00 -8.4220200E+00 -8.4045315E+00 -8.3870859E+00
 -8.3696823E+00 -8.3523207E+00 -8.3350019E+00 -8.3177233E+00
 -8.3004885E+00 -8.2832937E+00 -8.2661409E+00 -8.2490301E+00
 -8.2319603E+00 -8.2149315E+00 -8.1979437E+00 -8.1809969E+00
 -8.1640911E+00 -8.1472263E+00 -8.1304016E+00 -8.1136179E+00
 -8.0968742E+00 -8.0801716E+00 -8.0635080E+00 -8.0468855E+00
 -8.0303020E+00 -8.0137596E+00 -7.9972558E+00 -7.9807920E+00
 -7.9643679E+00 -7.9479833E+00 -7.9316378E+00 -7.9153314E+00
 -7.8990645E+00 -7.8828363E+00 -7.8666468E+00 -7.8504963E+00
 -7.8343844E+00 -7.8183112E+00 -7.8022766E+00 -7.7862802E+00
 -7.7703218E+00 -7.7544017E+00 -7.7385197E+00 -7.7226758E+00
 -7.7068696E+00 -7.6911011E+00 -7.6753702E+00 -7.6596766E+00
 -7.6440206E+00 -7.6284022E+00 -7.6128206E+00 -7.5972762E+00
 -7.5817690E+00 -7.5662990E+00 -7.5508652E+00 -7.5354681E+00
 -7.5201082E+00 -7.5047846E+00 -7.4894972E+00 -7.4742460E+00
 -7.4590316E+00 -7.4438529E+00 -7.4287105E+00 -7.4136033E+00
 -7.3985329E+00 -7.3834977E+00 -7.3684978E+00 -7.3535342E+00
 -7.3386054E+00 -7.3237123E+00 -7.3088546E+00 -7.2940316E+00
 -7.2792439E+00 -7.2644911E+00 -7.2497735E+00 -7.2350907E+00
 -7.2204418E+00 -7.2058282E+00 -7.1912489E+00 -7.1767039E+00
 -7.1621933E+00 -7.1477170E+00 -7.1332746E+00 -7.1188664E+00
 -7.1044922E+00 -7.0901518E+00 -7.0758452E+00 -7.0615721E+00
 -7.0473328E+00 -7.0331268E+00 -7.0189543E+00 -7.0048151E+00
 -6.9907088E+00 -6.9766359E+00 -6.9625964E+00 -6.9485893E+00
 -6.9346151E+00 -6.9206738E+00 -6.9067655E+00 -6.8928895E+00
 -6.8790460E+00 -6.8652349E+00 -6.8514562E+00 -6.8377099E+00
 -6.8239956E+00 -6.8103137E+00 -6.7966633E+00 -6.7830448E+00
 -6.7694583E+00 -6.7559037E+00 -6.7423806E+00 -6.7288895E+00
 -6.7154293E+00 -6.7020006E+00 -6.6886034E+00 -6.6752372E+00
 -6.6619024E+00 -6.6485987E+00 -6.6353254E+00 -6.6220837E+00
 -6.6088724E+00 -6.5956922E+00 -6.5825424E+00 -6.5694232E+00
 -6.5563345E+00 -6.5432763E+00 -6.5302482E+00 -6.5172505E+00
 -6.5042834E+00 -6.4913459E+00 -6.4784384E+00 -6.4655609E+00
 -6.4527130E+00 -6.4398956E+00 -6.4271073E+00 -6.4143486E+00
 -6.4016199E+00 -6.3889203E+00 -6.3762503E+00 -6.3636093E+00
 -6.3509979E+00 -6.3384151E+00 -6.3258619E+00 -6.3133373E+00
 -6.3008418E+00 -6.2883754E+00 -6.2759376E+00 -6.2635283E+00
 -6.2511477E+00 -6.2387958E+00 -6.2264724E+00 -6.2141771E+00
 -6.2019100E+00 -6.1896715E+00 -6.1774611E+00 -6.1652789E+00
 -6.1531243E+00 -6.1409984E+00 -6.1288996E+00 -6.1168289E+00
 -6.1047859E+00 -6.0927706E+00 -6.0807829E+00 -6.0688229E+00
 -6.0568900E+00 -6.0449843E+00 -6.0331063E+00 -6.0212555E+00
 -6.0094318E+00 -5.9976349E+00 -5.9858651E+00 -5.9741225E+00
 -5.9624066E+00 -5.9507179E+00 -5.9390554E+00 -5.9274197E+00
 -5.9158106E+00 -5.9042282E+00 -5.8926716E+00 -5.8811421E+00
 -5.8696384E+00 -5.8581614E+00 -5.8467102E+00 -5.8352852E+00
 -5.8238864E+00 -5.8125134E+00 -5.8011665E+00 -5.7898455E+00
 -5.7785501E+00 -5.7672801E+00 -5.7560358E+00 -5.7448177E+00
 -5.7336245E+00 -5.7224569E+00 -5.7113147E+00 -5.7001977E+00
 -5.6891065E+00 -5.6780396E+00 -5.6669984E+00 -5.6559820E+00
 -5.6449904E+00 -5.6340241E+00 -5.6230826E+00 -5.6121659E+00
 -5.6012735E+00 -5.5904059E+00 -5.5795631E+00 -5.5687447E+00
 -5.5579510E+00 -5.5471816E+00 -5.5364361E+00 -5.5257154E+00
 -5.5150189E+00 -5.5043464E+00 -5.4936981E+00 -5.4830737E+00
 -5.4724731E+00 -5.4618964E+00 -5.4513435E+00 -5.4408150E+00
 -5.4303098E+00 -5.4198284E+00 -5.4093704E+00 -5.3989358E+00
 -5.3885250E+00 -5.3781376E+00 -5.3677731E+00 -5.3574324E+00
 -5.3471146E+00 -5.3368201E+00 -5.3265491E+00 -5.3163009E+00
 -5.3060756E+00 -5.2958732E+00 -5.2856936E+00 -5.2755370E+00
 -5.2654028E+00 -5.2552919E+00 -5.2452030E+00 -5.2351375E+00
 -5.2250938E+00 -5.2150731E+00 -5.2050743E+00 -5.1950984E+00
 -5.1851444E+00 -5.1752129E+00 -5.1653032E+00 -5.1554160E+00
 -5.1455507E+00 -5.1357074E+00 -5.1258864E+00 -5.1160870E+00
 -5.1063094E+00 -5.0965533E+00 -5.0868196E+00 -5.0771074E+00
 -5.0674167E+00 -5.0577474E+00 -5.0481000E+00 -5.0384736E+00
 -5.0288692E+00 -5.0192857E+00 -5.0097237E+00 -5.0001826E+00
 -4.9906631E+00 -4.9811649E+00 -4.9716873E+00 -4.9622312E+00
 -4.9527955E+00 -4.9433813E+00 -4.9339876E+00 -4.9246149E+00
 -4.9152627E+00 -4.9059315E+00 -4.8966208E+00 -4.8873305E+00
 -4.8780613E+00 -4.8688121E+00 -4.8595839E+00 -4.8503757E+00
 -4.8411880E+00 -4.8320203E+00 -4.8228731E+00 -4.8137465E+00
 -4.8046393E+00 -4.7955527E+00 -4.7864857E+00 -4.7774391E+00
 -4.7684121E+00 -4.7594051E+00 -4.7504182E+00 -4.7414508E+00
 -4.7325034E+00 -4.7235756E+00 -4.7146673E+00 -4.7057786E+00
 -4.6969099E+00 -4.6880603E+00 -4.6792302E+00 -4.6704192E+00
 -4.6616278E+00 -4.6528559E+00 -4.6441031E+00 -4.6353693E+00
 -4.6266551E+00 -4.6179600E+00 -4.6092834E+00 -4.6006260E+00
 -4.5919876E+00 -4.5833683E+00 -4.5747676E+00 -4.5661860E+00
 -4.5576234E+00 -4.5490789E+00 -4.5405536E+00 -4.5320463E+00
 -4.5235581E+00 -4.5150886E+00 -4.5066371E+00 -4.4982047E+00
 -4.4897900E+00 -4.4813938E+00 -4.4730163E+00 -4.4646568E+00
 -4.4563155E+00 -4.4479923E+00 -4.4396877E+00 -4.4314003E+00
 -4.4231319E+00 -4.4148812E+00 -4.4066482E+00 -4.3984332E+00
 -4.3902359E+00 -4.3820567E+00 -4.3738952E+00 -4.3657513E+00
 -4.3576255E+00 -4.3495169E+00 -4.3414259E+00 -4.3333526E+00
 -4.3252969E+00 -4.3172584E+00 -4.3092375E+00 -4.3012338E+00
 -4.2932477E+00 -4.2852788E+00 -4.2773271E+00 -4.2693930E+00
 -4.2614756E+00 -4.2535753E+00 -4.2456923E+00 -4.2378263E+00
 -4.2299771E+00 -4.2221451E+00 -4.2143302E+00 -4.2065315E+00
 -4.1987500E+00 -4.1909857E+00 -4.1832376E+00 -4.1755066E+00
 -4.1677918E+00 -4.1600938E+00 -4.1524124E+00 -4.1447477E+00
 -4.1370993E+00 -4.1294675E+00 -4.1218524E+00 -4.1142530E+00
 -4.1066704E+00 -4.0991039E+00 -4.0915537E+00 -4.0840201E+00
 -4.0765023E+00 -4.0690007E+00 -4.0615149E+00 -4.0540457E+00
 -4.0465922E+00 -4.0391545E+00 -4.0317330E+00 -4.0243273E+00
 -4.0169382E+00 -4.0095639E+00 -4.0022058E+00 -3.9948635E+00
 -3.9875367E+00 -3.9802258E+00 -3.9729304E+00 -3.9656508E+00
 -3.9583864E+00 -3.9511378E+00 -3.9439046E+00 -3.9366868E+00
 -3.9294846E+00 -3.9222975E+00 -3.9151261E+00 -3.9079695E+00
 -3.9008286E+00 -3.8937025E+00 -3.8865917E+00 -3.8794963E+00
 -3.8724158E+00 -3.8653505E+00 -3.8583000E+00 -3.8512647E+00
 -3.8442445E+00 -3.8372390E+00 -3.8302484E+00 -3.8232727E+00
 -3.8163118E+00 -3.8093657E+00 -3.8024342E+00 -3.7955174E+00
 -3.7886157E+00 -3.7817283E+00 -3.7748556E+00 -3.7679973E+00
 -3.7611537E+00 -3.7543244E+00 -3.7475100E+00 -3.7407098E+00
 -3.7339237E+00 -3.7271523E+00 -3.7203951E+00 -3.7136521E+00
 -3.7069235E+00 -3.7002089E+00 -3.6935089E+00 -3.6868227E+00
 -3.6801507E+00 -3.6734929E+00 -3.6668489E+00 -3.6602192E+00
 -3.6536036E+00 -3.6470015E+00 -3.6404135E+00 -3.6338396E+00
 -3.6272793E+00 -3.6207328E+00 -3.6142001E+00 -3.6076810E+00
 -3.6011760E+00 -3.5946844E+00 -3.5882065E+00 -3.5817423E+00
 -3.5752914E+00 -3.5688546E+00 -3.5624309E+00 -3.5560207E+00
 -3.5496240E+00 -3.5432408E+00 -3.5368707E+00 -3.5305142E+00
 -3.5241714E+00 -3.5178413E+00 -3.5115244E+00 -3.5052214E+00
 -3.4989309E+00 -3.4926541E+00 -3.4863901E+00 -3.4801393E+00
 -3.4739015E+00 -3.4676766E+00 -3.4614649E+00 -3.4552665E+00
 -3.4490805E+00 -3.4429078E+00 -3.4367478E+00 -3.4306006E+00
 -3.4244666E+00 -3.4183450E+00 -3.4122362E+00 -3.4061403E+00
 -3.4000571E+00 -3.3939862E+00 -3.3879282E+00 -3.3818829E+00
 -3.3758500E+00 -3.3698297E+00 -3.3638222E+00 -3.3578269E+00
 -3.3518443E+00 -3.3458738E+00 -3.3399160E+00 -3.3339703E+00
 -3.3280373E+00 -3.3221161E+00 -3.3162076E+00 -3.3103113E+00
 -3.3044271E+00 -3.2985551E+00 -3.2926955E+00 -3.2868478E+00
 -3.2810123E+00 -3.2751889E+00 -3.2693775E+00 -3.2635782E+00
 -3.2577910E+00 -3.2520156E+00 -3.2462521E+00 -3.2405005E+00
 -3.2347610E+00 -3.2290332E+00 -3.2233171E+00 -3.2176130E+00
 -3.2119207E+00 -3.2062399E+00 -3.2005713E+00 -3.1949141E+00
 -3.1892686E+00 -3.1836345E+00 -3.1780121E+00 -3.1724014E+00
 -3.1668022E+00 -3.1612148E+00 -3.1556385E+00 -3.1500738E+00
 -3.1445205E+00 -3.1389787E+00 -3.1334484E+00 -3.1279292E+00
 -3.1224215E+00 -3.1169250E+00 -3.1114399E+00 -3.1059661E+00
 -3.1005034E+00 -3.0950520E+00 -3.0896118E+00 -3.0841827E+00
 -3.0787647E+00 -3.0733578E+00 -3.0679619E+00 -3.0625772E+00
 -3.0572035E+00 -3.0518408E+00 -3.0464890E+00 -3.0411482E+00
 -3.0358183E+00 -3.0304995E+00 -3.0251913E+00 -3.0198939E+00
 -3.0146074E+00 -3.0093317E+00 -3.0040669E+00 -2.9988127E+00
 -2.9935691E+00 -2.9883366E+00 -2.9831145E+00 -2.9779029E+00
 -2.9727023E+00 -2.9675119E+00 -2.9623322E+00 -2.9571633E+00
 -2.9520047E+00 -2.9468565E+00 -2.9417191E+00 -2.9365919E+00
 -2.9314749E+00 -2.9263687E+00 -2.9212728E+00 -2.9161870E+00
 -2.9111118E+00 -2.9060469E+00 -2.9009919E+00 -2.8959475E+00
 -2.8909132E+00 -2.8858893E+00 -2.8808756E+00 -2.8758717E+00
 -2.8708782E+00 -2.8658948E+00 -2.8609211E+00 -2.8559580E+00
 -2.8510048E+00 -2.8460615E+00 -2.8411286E+00 -2.8362052E+00
 -2.8312917E+00 -2.8263886E+00 -2.8214951E+00 -2.8166115E+00
 -2.8117378E+00 -2.8068738E+00 -2.8020198E+00 -2.7971754E+00
 -2.7923408E+00 -2.7875161E+00 -2.7827010E+00 -2.7778957E+00
 -2.7730999E+00 -2.7683139E+00 -2.7635374E+00 -2.7587707E+00
 -2.7540138E+00 -2.7492659E+00 -2.7445281E+00 -2.7397995E+00
 -2.7350802E+00 -2.7303708E+00 -2.7256708E+00 -2.7209799E+00
 -2.7162988E+00 -2.7116270E+00 -2.7069645E+00 -2.7023113E+00
 -2.6976676E+00 -2.6930330E+00 -2.6884077E+00 -2.6837916E+00
 -2.6791849E+00 -2.6745875E+00 -2.6699994E+00 -2.6654203E+00
 -2.6608503E+00 -2.6562896E+00 -2.6517377E+00 -2.6471953E+00
 -2.6426618E+00 -2.6381373E+00 -2.6336217E+00 -2.6291156E+00
 -2.6246181E+00 -2.6201296E+00 -2.6156499E+00 -2.6111796E+00
 -2.6067178E+00 -2.6022649E+00 -2.5978212E+00 -2.5933862E+00
 -2.5889599E+00 -2.5845425E+00 -2.5801339E+00 -2.5757341E+00
 -2.5713429E+00 -2.5669608E+00 -2.5625870E+00 -2.5582221E+00
 -2.5538657E+00 -2.5495183E+00 -2.5451794E+00 -2.5408487E+00
 -2.5365269E+00 -2.5322137E+00 -2.5279093E+00 -2.5236130E+00
 -2.5193255E+00 -2.5150466E+00 -2.5107758E+00 -2.5065136E+00
 -2.5022597E+00 -2.4980145E+00 -2.4937775E+00 -2.4895492E+00
 -2.4853289E+00 -2.4811170E+00 -2.4769137E+00 -2.4727185E+00
 -2.4685314E+00 -2.4643528E+00 -2.4601824E+00 -2.4560204E+00
 -2.4518664E+00 -2.4477205E+00 -2.4435830E+00 -2.4394536E+00
 -2.4353323E+00 -2.4312191E+00 -2.4271140E+00 -2.4230173E+00
 -2.4189281E+00 -2.4148474E+00 -2.4107745E+00 -2.4067097E+00
 -2.4026530E+00 -2.3986042E+00 -2.3945632E+00 -2.3905303E+00
 -2.3865051E+00 -2.3824880E+00 -2.3784788E+00 -2.3744774E+00
 -2.3704839E+00 -2.3664982E+00 -2.3625205E+00 -2.3585503E+00
 -2.3545880E+00 -2.3506336E+00 -2.3466868E+00 -2.3427477E+00
 -2.3388164E+00 -2.3348927E+00 -2.3309767E+00 -2.3270686E+00
 -2.3231678E+00 -2.3192749E+00 -2.3153894E+00 -2.3115115E+00
 -2.3076413E+00 -2.3037786E+00 -2.2999234E+00 -2.2960758E+00
 -2.2922356E+00 -2.2884030E+00 -2.2845778E+00 -2.2807603E+00
 -2.2769499E+00 -2.2731471E+00 -2.2693517E+00 -2.2655637E+00
 -2.2617829E+00 -2.2580097E+00 -2.2542436E+00 -2.2504849E+00
 -2.2467337E+00 -2.2429898E+00 -2.2392530E+00 -2.2355235E+00
 -2.2318013E+00 -2.2280862E+00 -2.2243783E+00 -2.2206776E+00
 -2.2169843E+00 -2.2132981E+00 -2.2096188E+00 -2.2059469E+00
 -2.2022820E+00 -2.1986244E+00 -2.1949737E+00 -2.1913300E+00
 -2.1876934E+00 -2.1840639E+00 -2.1804414E+00 -2.1768260E+00
 -2.1732175E+00 -2.1696160E+00 -2.1660213E+00 -2.1624336E+00
 -2.1588531E+00 -2.1552792E+00 -2.1517124E+00 -2.1481524E+00
 -2.1445994E+00 -2.1410530E+00 -2.1375136E+00 -2.1339810E+00
 -2.1304553E+00 -2.1269362E+00 -2.1234241E+00 -2.1199186E+00
 -2.1164200E+00 -2.1129279E+00 -2.1094427E+00 -2.1059642E+00
 -2.1024923E+00 -2.0990272E+00 -2.0955687E+00 -2.0921168E+00
 -2.0886717E+00 -2.0852330E+00 -2.0818009E+00 -2.0783756E+00
 -2.0749567E+00 -2.0715444E+00 -2.0681386E+00 -2.0647395E+00
 -2.0613468E+00 -2.0579605E+00 -2.0545809E+00 -2.0512075E+00
 -2.0478408E+00 -2.0444806E+00 -2.0411265E+00 -2.0377791E+00
 -2.0344381E+00 -2.0311034E+00 -2.0277750E+00 -2.0244532E+00
 -2.0211375E+00 -2.0178282E+00 -2.0145252E+00 -2.0112286E+00
 -2.0079384E+00 -2.0046542E+00 -2.0013764E+00 -1.9981048E+00
 -1.9948395E+00 -1.9915804E+00 -1.9883275E+00 -1.9850808E+00
 -1.9818404E+00 -1.9786060E+00 -1.9753778E+00 -1.9721558E+00
 -1.9689399E+00 -1.9657301E+00 -1.9625263E+00 -1.9593288E+00
 -1.9561373E+00 -1.9529518E+00 -1.9497724E+00 -1.9465990E+00
 -1.9434316E+00 -1.9402703E+00 -1.9371150E+00 -1.9339657E+00
 -1.9308223E+00 -1.9276849E+00 -1.9245534E+00 -1.9214278E+00
 -1.9183083E+00 -1.9151945E+00 -1.9120867E+00 -1.9089848E+00
 -1.9058887E+00 -1.9027984E+00 -1.8997141E+00 -1.8966355E+00
 -1.8935628E+00 -1.8904959E+00 -1.8874348E+00 -1.8843795E+00
 -1.8813299E+00 -1.8782861E+00 -1.8752481E+00 -1.8722156E+00
 -1.8691890E+00 -1.8661681E+00 -1.8631530E+00 -1.8601434E+00
 -1.8571395E+00 -1.8541414E+00 -1.8511487E+00 -1.8481618E+00
 -1.8451805E+00 -1.8422048E+00 -1.8392347E+00 -1.8362702E+00
 -1.8333113E+00 -1.8303579E+00 -1.8274101E+00 -1.8244678E+00
 -1.8215311E+00 -1.8185997E+00 -1.8156739E+00 -1.8127537E+00
 -1.8098389E+00 -1.8069296E+00 -1.8040258E+00 -1.8011273E+00
 -1.7982343E+00 -1.7953467E+00 -1.7924646E+00 -1.7895879E+00
 -1.7867165E+00 -1.7838504E+00 -1.7809898E+00 -1.7781346E+00
 -1.7752845E+00 -1.7724400E+00 -1.7696006E+00 -1.7667667E+00
 -1.7639380E+00 -1.7611145E+00 -1.7582964E+00 -1.7554835E+00
 -1.7526758E+00 -1.7498734E+00 -1.7470762E+00 -1.7442843E+00
 -1.7414974E+00 -1.7387159E+00 -1.7359395E+00 -1.7331682E+00
 -1.7304022E+00 -1.7276413E+00 -1.7248856E+00 -1.7221348E+00
 -1.7193893E+00 -1.7166489E+00 -1.7139136E+00 -1.7111833E+00
 -1.7084582E+00 -1.7057381E+00 -1.7030230E+00 -1.7003130E+00
 -1.6976080E+00 -1.6949080E+00 -1.6922131E+00 -1.6895231E+00
 -1.6868382E+00 -1.6841581E+00 -1.6814830E+00 -1.6788130E+00
 -1.6761478E+00 -1.6734877E+00 -1.6708324E+00 -1.6681820E+00
 -1.6655365E+00 -1.6628959E+00 -1.6602603E+00 -1.6576295E+00
 -1.6550035E+00 -1.6523825E+00 -1.6497662E+00 -1.6471548E+00
 -1.6445482E+00 -1.6419463E+00 -1.6393493E+00 -1.6367573E+00
 -1.6341698E+00 -1.6315871E+00 -1.6290092E+00 -1.6264361E+00
 -1.6238678E+00 -1.6213040E+00 -1.6187451E+00 -1.6161909E+00
 -1.6136414E+00 -1.6110965E+00 -1.6085564E+00 -1.6060208E+00
 -1.6034900E+00 -1.6009638E+00 -1.5984423E+00 -1.5959255E+00
 -1.5934131E+00 -1.5909054E+00 -1.5884024E+00 -1.5859040E+00
 -1.5834100E+00 -1.5809207E+00 -1.5784360E+00 -1.5759557E+00
 -1.5734801E+00 -1.5710090E+00 -1.5685425E+00 -1.5660805E+00
 -1.5636228E+00 -1.5611697E+00 -1.5587212E+00 -1.5562772E+00
 -1.5538374E+00 -1.5514023E+00 -1.5489717E+00 -1.5465453E+00
 -1.5441235E+00 -1.5417061E+00 -1.5392931E+00 -1.5368845E+00
 -1.5344803E+00 -1.5320805E+00 -1.5296850E+00 -1.5272939E+00
 -1.5249072E+00 -1.5225250E+00 -1.5201468E+00 -1.5177733E+00
 -1.5154039E+00 -1.5130388E+00 -1.5106781E+00 -1.5083216E+00
 -1.5059695E+00 -1.5036216E+00 -1.5012779E+00 -1.4989387E+00
 -1.4966035E+00 -1.4942727E+00 -1.4919461E+00 -1.4896237E+00
 -1.4873055E+00 -1.4849916E+00 -1.4826818E+00 -1.4803761E+00
 -1.4780748E+00 -1.4757775E+00 -1.4734844E+00 -1.4711956E+00
 -1.4689108E+00 -1.4666302E+00 -1.4643537E+00 -1.4620813E+00
 -1.4598130E+00 -1.4575489E+00 -1.4552888E+00 -1.4530329E+00
 -1.4507810E+00 -1.4485332E+00 -1.4462894E+00 -1.4440497E+00
 -1.4418141E+00 -1.4395823E+00 -1.4373548E+00 -1.4351312E+00
 -1.4329116E+00 -1.4306961E+00 -1.4284846E+00 -1.4262770E+00
 -1.4240735E+00 -1.4218738E+00 -1.4196781E+00 -1.4174864E+00
 -1.4152987E+00 -1.4131148E+00 -1.4109349E+00 -1.4087590E+00
 -1.4065869E+00 -1.4044187E+00 -1.4022545E+00 -1.4000942E+00
 -1.3979377E+00 -1.3957851E+00 -1.3936363E+00 -1.3914914E+00
 -1.3893504E+00 -1.3872132E+00 -1.3850799E+00 -1.3829503E+00
 -1.3808247E+00 -1.3787028E+00 -1.3765846E+00 -1.3744704E+00
 -1.3723599E+00 -1.3702531E+00 -1.3681501E+00 -1.3660510E+00
 -1.3639555E+00 -1.3618639E+00 -1.3597759E+00 -1.3576916E+00
 -1.3556112E+00 -1.3535345E+00 -1.3514613E+00 -1.3493921E+00
 -1.3473264E+00 -1.3452643E+00 -1.3432060E+00 -1.3411515E+00
 -1.3391005E+00 -1.3370532E+00 -1.3350096E+00 -1.3329695E+00
 -1.3309332E+00 -1.3289005E+00 -1.3268714E+00 -1.3248459E+00
 -1.3228240E+00 -1.3208057E+00 -1.3187910E+00 -1.3167799E+00
 -1.3147724E+00 -1.3127683E+00 -1.3107680E+00 -1.3087711E+00
 -1.3067777E+00 -1.3047880E+00 -1.3028017E+00 -1.3008190E+00
 -1.2988399E+00 -1.2968643E+00 -1.2948921E+00 -1.2929235E+00
 -1.2909582E+00 -1.2889966E+00 -1.2870383E+00 -1.2850835E+00
 -1.2831323E+00 -1.2811844E+00 -1.2792401E+00 -1.2772992E+00
 -1.2753617E+00 -1.2734276E+00 -1.2714969E+00 -1.2695696E+00
 -1.2676458E+00 -1.2657254E+00 -1.2638084E+00 -1.2618947E+00
 -1.2599844E+00 -1.2580775E+00 -1.2561740E+00 -1.2542738E+00
 -1.2523770E+00 -1.2504835E+00 -1.2485933E+00 -1.2467066E+00
 -1.2448231E+00 -1.2429429E+00 -1.2410661E+00 -1.2391926E+00
 -1.2373223E+00 -1.2354554E+00 -1.2335917E+00 -1.2317313E+00
 -1.2298741E+00 -1.2280203E+00 -1.2261697E+00 -1.2243224E+00
 -1.2224783E+00 -1.2206374E+00 -1.2187998E+00 -1.2169654E+00
 -1.2151343E+00 -1.2133063E+00 -1.2114816E+00 -1.2096601E+00
 -1.2078416E+00 -1.2060266E+00 -1.2042146E+00 -1.2024057E+00
 -1.2006000E+00 -1.1987976E+00 -1.1969982E+00 -1.1952021E+00
 -1.1934091E+00 -1.1916192E+00 -1.1898324E+00 -1.1880488E+00
 -1.1862683E+00 -1.1844909E+00 -1.1827166E+00 -1.1809454E+00
 -1.1791773E+00 -1.1774123E+00 -1.1756504E+00 -1.1738914E+00
 -1.1721357E+00 -1.1703830E+00 -1.1686333E+00 -1.1668867E+00
 -1.1651431E+00 -1.1634026E+00 -1.1616651E+00 -1.1599306E+00
 -1.1581992E+00 -1.1564707E+00 -1.1547452E+00 -1.1530229E+00
 -1.1513034E+00 -1.1495869E+00 -1.1478735E+00 -1.1461630E+00
 -1.1444556E+00 -1.1427510E+00 -1.1410494E+00 -1.1393508E+00
 -1.1376551E+00 -1.1359624E+00 -1.1342726E+00 -1.1325858E+00
 -1.1309018E+00 -1.1292208E+00 -1.1275427E+00 -1.1258675E+00
 -1.1241952E+00 -1.1225258E+00 -1.1208594E+00 -1.1191957E+00
 -1.1175350E+00 -1.1158772E+00 -1.1142222E+00 -1.1125700E+00
 -1.1109208E+00 -1.1092743E+00 -1.1076307E+00 -1.1059901E+00
 -1.1043521E+00 -1.1027170E+00 -1.1010848E+00 -1.0994554E+00
 -1.0978287E+00 -1.0962050E+00 -1.0945840E+00 -1.0929657E+00
 -1.0913503E+00 -1.0897377E+00 -1.0881279E+00 -1.0865208E+00
 -1.0849165E+00 -1.0833149E+00 -1.0817161E+00 -1.0801201E+00
 -1.0785267E+00 -1.0769362E+00 -1.0753484E+00 -1.0737634E+00
 -1.0721810E+00 -1.0706013E+00 -1.0690244E+00 -1.0674502E+00
 -1.0658786E+00 -1.0643098E+00 -1.0627438E+00 -1.0611804E+00
 -1.0596195E+00 -1.0580615E+00 -1.0565060E+00 -1.0549533E+00
 -1.0534033E+00 -1.0518558E+00 -1.0503111E+00 -1.0487690E+00
 -1.0472295E+00 -1.0456927E+00 -1.0441585E+00 -1.0426269E+00
 -1.0410979E+00 -1.0395715E+00 -1.0380478E+00 -1.0365267E+00
 -1.0350081E+00 -1.0334922E+00 -1.0319788E+00 -1.0304681E+00
 -1.0289599E+00 -1.0274543E+00 -1.0259513E+00 -1.0244508E+00
 -1.0229528E+00 -1.0214574E+00 -1.0199647E+00 -1.0184743E+00
 -1.0169867E+00 -1.0155015E+00 -1.0140188E+00 -1.0125387E+00
 -1.0110611E+00 -1.0095860E+00 -1.0081134E+00 -1.0066433E+00
 -1.0051757E+00 -1.0037106E+00 -1.0022480E+00 -1.0007879E+00
 -9.9933022E-01 -9.9787509E-01 -9.9642241E-01 -9.9497217E-01
 -9.9352443E-01 -9.9207908E-01 -9.9063629E-01 -9.8919582E-01
 -9.8775792E-01 -9.8632240E-01 -9.8488933E-01 -9.8345864E-01
 -9.8203039E-01 -9.8060459E-01 -9.7918117E-01 -9.7776020E-01
 -9.7634161E-01 -9.7492540E-01 -9.7351164E-01 -9.7210026E-01
 -9.7069120E-01 -9.6928459E-01 -9.6788037E-01 -9.6647847E-01
 -9.6507895E-01 -9.6368182E-01 -9.6228701E-01 -9.6089458E-01
 -9.5950449E-01 -9.5811677E-01 -9.5673138E-01 -9.5534831E-01
 -9.5396757E-01 -9.5258921E-01 -9.5121312E-01 -9.4983935E-01
 -9.4846791E-01 -9.4709879E-01 -9.4573194E-01 -9.4436741E-01
 -9.4300520E-01 -9.4164526E-01 -9.4028759E-01 -9.3893224E-01
 -9.3757915E-01 -9.3622833E-01 -9.3487978E-01 -9.3353349E-01
 -9.3218946E-01 -9.3084770E-01 -9.2950821E-01 -9.2817098E-01
 -9.2683595E-01 -9.2550313E-01 -9.2417258E-01 -9.2284429E-01
 -9.2151821E-01 -9.2019433E-01 -9.1887271E-01 -9.1755325E-01
 -9.1623604E-01 -9.1492105E-01 -9.1360825E-01 -9.1229761E-01
 -9.1098922E-01 -9.0968293E-01 -9.0837890E-01 -9.0707707E-01
 -9.0577734E-01 -9.0447980E-01 -9.0318447E-01 -9.0189129E-01
 -9.0060025E-01 -8.9931136E-01 -8.9802468E-01 -8.9674008E-01
 -8.9545763E-01 -8.9417738E-01 -8.9289922E-01 -8.9162320E-01
 -8.9034927E-01 -8.8907748E-01 -8.8780785E-01 -8.8654029E-01
 -8.8527489E-01 -8.8401157E-01 -8.8275033E-01 -8.8149118E-01
 -8.8023418E-01 -8.7897927E-01 -8.7772638E-01 -8.7647563E-01
 -8.7522697E-01 -8.7398034E-01 -8.7273580E-01 -8.7149328E-01
 -8.7025291E-01 -8.6901456E-01 -8.6777824E-01 -8.6654401E-01
 -8.6531180E-01 -8.6408162E-01 -8.6285353E-01 -8.6162746E-01
 -8.6040342E-01 -8.5918140E-01 -8.5796136E-01 -8.5674340E-01
 -8.5552746E-01 -8.5431349E-01 -8.5310155E-01 -8.5189164E-01
 -8.5068375E-01 -8.4947777E-01 -8.4827387E-01 -8.4707189E-01
 -8.4587193E-01 -8.4467399E-01 -8.4347796E-01 -8.4228396E-01
 -8.4109187E-01 -8.3990180E-01 -8.3871371E-01 -8.3752751E-01
 -8.3634335E-01 -8.3516109E-01 -8.3398080E-01 -8.3280241E-01
 -8.3162600E-01 -8.3045155E-01 -8.2927901E-01 -8.2810837E-01
 -8.2693970E-01 -8.2577294E-01 -8.2460809E-01 -8.2344520E-01
 -8.2228416E-01 -8.2112509E-01 -8.1996787E-01 -8.1881261E-01
 -8.1765920E-01 -8.1650770E-01 -8.1535810E-01 -8.1421036E-01
 -8.1306458E-01 -8.1192058E-01 -8.1077850E-01 -8.0963832E-01
 -8.0849999E-01 -8.0736351E-01 -8.0622894E-01 -8.0509615E-01
 -8.0396527E-01 -8.0283624E-01 -8.0170906E-01 -8.0058372E-01
 -7.9946023E-01 -7.9833859E-01 -7.9721880E-01 -7.9610080E-01
 -7.9498464E-01 -7.9387027E-01 -7.9275775E-01 -7.9164708E-01
 -7.9053819E-01 -7.8943115E-01 -7.8832585E-01 -7.8722245E-01
 -7.8612077E-01 -7.8502095E-01 -7.8392285E-01 -7.8282660E-01
 -7.8173214E-01 -7.8063941E-01 -7.7954853E-01 -7.7845937E-01
 -7.7737200E-01 -7.7628642E-01 -7.7520257E-01 -7.7412057E-01
 -7.7304024E-01 -7.7196175E-01 -7.7088493E-01 -7.6980990E-01
 -7.6873660E-01 -7.6766509E-01 -7.6659530E-01 -7.6552725E-01
 -7.6446092E-01 -7.6339632E-01 -7.6233351E-01 -7.6127237E-01
 -7.6021296E-01 -7.5915527E-01 -7.5809932E-01 -7.5704503E-01
 -7.5599247E-01 -7.5494164E-01 -7.5389254E-01 -7.5284505E-01
 -7.5179935E-01 -7.5075531E-01 -7.4971294E-01 -7.4867225E-01
 -7.4763328E-01 -7.4659598E-01 -7.4556035E-01 -7.4452645E-01
 -7.4349415E-01 -7.4246353E-01 -7.4143463E-01 -7.4040735E-01
 -7.3938173E-01 -7.3835778E-01 -7.3733550E-01 -7.3631483E-01
 -7.3529583E-01 -7.3427844E-01 -7.3326278E-01 -7.3224866E-01
 -7.3123622E-01 -7.3022544E-01 -7.2921622E-01 -7.2820866E-01
 -7.2720277E-01 -7.2619843E-01 -7.2519577E-01 -7.2419465E-01
 -7.2319520E-01 -7.2219735E-01 -7.2120112E-01 -7.2020650E-01
 -7.1921343E-01 -7.1822196E-01 -7.1723211E-01 -7.1624386E-01
 -7.1525717E-01 -7.1427208E-01 -7.1328855E-01 -7.1230668E-01
 -7.1132630E-01 -7.1034753E-01 -7.0937032E-01 -7.0839465E-01
 -7.0742065E-01 -7.0644808E-01 -7.0547718E-01 -7.0450777E-01
 -7.0353991E-01 -7.0257360E-01 -7.0160890E-01 -7.0064569E-01
 -6.9968402E-01 -6.9872391E-01 -6.9776535E-01 -6.9680828E-01
 -6.9585276E-01 -6.9489878E-01 -6.9394630E-01 -6.9299543E-01
 -6.9204599E-01 -6.9109809E-01 -6.9015169E-01 -6.8920684E-01
 -6.8826348E-01 -6.8732160E-01 -6.8638122E-01 -6.8544239E-01
 -6.8450505E-01 -6.8356919E-01 -6.8263477E-01 -6.8170190E-01
 -6.8077052E-01 -6.7984062E-01 -6.7891222E-01 -6.7798525E-01
 -6.7705977E-01 -6.7613578E-01 -6.7521328E-01 -6.7429215E-01
 -6.7337263E-01 -6.7245448E-01 -6.7153782E-01 -6.7062259E-01
 -6.6970885E-01 -6.6879654E-01 -6.6788566E-01 -6.6697627E-01
 -6.6606826E-01 -6.6516173E-01 -6.6425669E-01 -6.6335303E-01
 -6.6245085E-01 -6.6155005E-01 -6.6065067E-01 -6.5975273E-01
 -6.5885627E-01 -6.5796113E-01 -6.5706748E-01 -6.5617526E-01
 -6.5528440E-01 -6.5439498E-01 -6.5350699E-01 -6.5262038E-01
 -6.5173513E-01 -6.5085131E-01 -6.4996892E-01 -6.4908791E-01
 -6.4820832E-01 -6.4733005E-01 -6.4645320E-01 -6.4557773E-01
 -6.4470369E-01 -6.4383096E-01 -6.4295965E-01 -6.4208972E-01
 -6.4122117E-01 -6.4035398E-01 -6.3948810E-01 -6.3862365E-01
 -6.3776058E-01 -6.3689882E-01 -6.3603842E-01 -6.3517940E-01
 -6.3432175E-01 -6.3346541E-01 -6.3261044E-01 -6.3175678E-01
 -6.3090450E-01 -6.3005358E-01 -6.2920398E-01 -6.2835568E-01
 -6.2750876E-01 -6.2666315E-01 -6.2581885E-01 -6.2497592E-01
 -6.2413430E-01 -6.2329400E-01 -6.2245500E-01 -6.2161738E-01
 -6.2078100E-01 -6.1994600E-01 -6.1911225E-01 -6.1827981E-01
 -6.1744875E-01 -6.1661887E-01 -6.1579043E-01 -6.1496317E-01
 -6.1413729E-01 -6.1331266E-01 -6.1248934E-01 -6.1166728E-01
 -6.1084652E-01 -6.1002707E-01 -6.0920882E-01 -6.0839194E-01
 -6.0757631E-01 -6.0676199E-01 -6.0594893E-01 -6.0513705E-01
 -6.0432655E-01 -6.0351723E-01 -6.0270923E-01 -6.0190248E-01
 -6.0109699E-01 -6.0029280E-01 -5.9948981E-01 -5.9868807E-01
 -5.9788758E-01 -5.9708840E-01 -5.9629041E-01 -5.9549367E-01
 -5.9469819E-01 -5.9390390E-01 -5.9311092E-01 -5.9231907E-01
 -5.9152853E-01 -5.9073925E-01 -5.8995116E-01 -5.8916432E-01
 -5.8837867E-01 -5.8759421E-01 -5.8681101E-01 -5.8602905E-01
 -5.8524829E-01 -5.8446872E-01 -5.8369040E-01 -5.8291328E-01
 -5.8213735E-01 -5.8136261E-01 -5.8058912E-01 -5.7981682E-01
 -5.7904565E-01 -5.7827574E-01 -5.7750702E-01 -5.7673949E-01
 -5.7597315E-01 -5.7520795E-01 -5.7444400E-01 -5.7368124E-01
 -5.7291961E-01 -5.7215917E-01 -5.7139993E-01 -5.7064188E-01
 -5.6988496E-01 -5.6912923E-01 -5.6837463E-01 -5.6762123E-01
 -5.6686902E-01 -5.6611794E-01 -5.6536806E-01 -5.6461930E-01
 -5.6387168E-01 -5.6312525E-01 -5.6237996E-01 -5.6163585E-01
 -5.6089288E-01 -5.6015104E-01 -5.5941033E-01 -5.5867076E-01
 -5.5793238E-01 -5.5719513E-01 -5.5645895E-01 -5.5572397E-01
 -5.5499005E-01 -5.5425733E-01 -5.5352575E-01 -5.5279523E-01
 -5.5206585E-01 -5.5133766E-01 -5.5061054E-01 -5.4988450E-01
 -5.4915965E-01 -5.4843587E-01 -5.4771322E-01 -5.4699165E-01
 -5.4627120E-01 -5.4555190E-01 -5.4483366E-01 -5.4411656E-01
 -5.4340053E-01 -5.4268563E-01 -5.4197180E-01 -5.4125905E-01
 -5.4054743E-01 -5.3983688E-01 -5.3912741E-01 -5.3841907E-01
 -5.3771180E-01 -5.3700560E-01 -5.3630042E-01 -5.3559637E-01
 -5.3489345E-01 -5.3419155E-01 -5.3349078E-01 -5.3279102E-01
 -5.3209233E-01 -5.3139478E-01 -5.3069824E-01 -5.3000277E-01
 -5.2930838E-01 -5.2861500E-01 -5.2792275E-01 -5.2723151E-01
 -5.2654135E-01 -5.2585220E-01 -5.2516419E-01 -5.2447712E-01
 -5.2379119E-01 -5.2310628E-01 -5.2242237E-01 -5.2173960E-01
 -5.2105778E-01 -5.2037704E-01 -5.1969731E-01 -5.1901865E-01
 -5.1834100E-01 -5.1766437E-01 -5.1698881E-01 -5.1631427E-01
 -5.1564074E-01 -5.1496822E-01 -5.1429677E-01 -5.1362628E-01
 -5.1295686E-01 -5.1228845E-01 -5.1162100E-01 -5.1095462E-01
 -5.1028925E-01 -5.0962490E-01 -5.0896150E-01 -5.0829917E-01
 -5.0763780E-01 -5.0697750E-01 -5.0631815E-01 -5.0565982E-01
 -5.0500250E-01 -5.0434613E-01 -5.0369078E-01 -5.0303644E-01
 -5.0238305E-01 -5.0173068E-01 -5.0107932E-01 -5.0042892E-01
 -4.9977946E-01 -4.9913105E-01 -4.9848360E-01 -4.9783713E-01
 -4.9719164E-01 -4.9654710E-01 -4.9590358E-01 -4.9526101E-01
 -4.9461940E-01 -4.9397877E-01 -4.9333909E-01 -4.9270043E-01
 -4.9206269E-01 -4.9142593E-01 -4.9079010E-01 -4.9015525E-01
 -4.8952138E-01 -4.8888841E-01 -4.8825645E-01 -4.8762542E-01
 -4.8699534E-01 -4.8636621E-01 -4.8573804E-01 -4.8511082E-01
 -4.8448452E-01 -4.8385921E-01 -4.8323479E-01 -4.8261133E-01
 -4.8198879E-01 -4.8136723E-01 -4.8074657E-01 -4.8012686E-01
 -4.7950807E-01 -4.7889021E-01 -4.7827327E-01 -4.7765729E-01
 -4.7704220E-01 -4.7642806E-01 -4.7581482E-01 -4.7520253E-01
 -4.7459114E-01 -4.7398064E-01 -4.7337109E-01 -4.7276244E-01
 -4.7215474E-01 -4.7154790E-01 -4.7094199E-01 -4.7033700E-01
 -4.6973291E-01 -4.6912971E-01 -4.6852744E-01 -4.6792606E-01
 -4.6732557E-01 -4.6672598E-01 -4.6612731E-01 -4.6552950E-01
 -4.6493262E-01 -4.6433660E-01 -4.6374151E-01 -4.6314728E-01
 -4.6255395E-01 -4.6196151E-01 -4.6136993E-01 -4.6077925E-01
 -4.6018946E-01 -4.5960054E-01 -4.5901251E-01 -4.5842531E-01
 -4.5783904E-01 -4.5725366E-01 -4.5666909E-01 -4.5608544E-01
 -4.5550266E-01 -4.5492074E-01 -4.5433965E-01 -4.5375946E-01
 -4.5318016E-01 -4.5260167E-01 -4.5202407E-01 -4.5144734E-01
 -4.5087144E-01 -4.5029640E-01 -4.4972223E-01 -4.4914889E-01
 -4.4857645E-01 -4.4800481E-01 -4.4743404E-01 -4.4686416E-01
 -4.4629508E-01 -4.4572684E-01 -4.4515944E-01 -4.4459292E-01
 -4.4402722E-01 -4.4346234E-01 -4.4289833E-01 -4.4233516E-01
 -4.4177279E-01 -4.4121128E-01 -4.4065061E-01 -4.4009075E-01
 -4.3953171E-01 -4.3897352E-01 -4.3841618E-01 -4.3785962E-01
 -4.3730390E-01 -4.3674901E-01 -4.3619493E-01 -4.3564168E-01
 -4.3508926E-01 -4.3453762E-01 -4.3398681E-01 -4.3343681E-01
 -4.3288764E-01 -4.3233931E-01 -4.3179175E-01 -4.3124500E-01
 -4.3069905E-01 -4.3015394E-01 -4.2960960E-01 -4.2906606E-01
 -4.2852336E-01 -4.2798144E-01 -4.2744032E-01 -4.2690000E-01
 -4.2636049E-01 -4.2582172E-01 -4.2528379E-01 -4.2474666E-01
 -4.2421031E-01 -4.2367476E-01 -4.2313999E-01 -4.2260596E-01
 -4.2207277E-01 -4.2154038E-01 -4.2100874E-01 -4.2047787E-01
 -4.1994780E-01 -4.1941851E-01 -4.1889000E-01 -4.1836229E-01
 -4.1783533E-01 -4.1730914E-01 -4.1678372E-01 -4.1625908E-01
 -4.1573519E-01 -4.1521209E-01 -4.1468978E-01 -4.1416821E-01
 -4.1364741E-01 -4.1312736E-01 -4.1260809E-01 -4.1208959E-01
 -4.1157183E-01 -4.1105482E-01 -4.1053858E-01 -4.1002309E-01
 -4.0950838E-01 -4.0899441E-01 -4.0848118E-01 -4.0796870E-01
 -4.0745696E-01 -4.0694603E-01 -4.0643579E-01 -4.0592632E-01
 -4.0541756E-01 -4.0490961E-01 -4.0440235E-01 -4.0389585E-01
 -4.0339008E-01 -4.0288505E-01 -4.0238076E-01 -4.0187719E-01
 -4.0137440E-01 -4.0087229E-01 -4.0037096E-01 -3.9987034E-01
 -3.9937046E-01 -3.9887127E-01 -3.9837286E-01 -3.9787516E-01
 -3.9737815E-01 -3.9688191E-01 -3.9638638E-01 -3.9589155E-01
 -3.9539748E-01 -3.9490411E-01 -3.9441141E-01 -3.9391950E-01
 -3.9342827E-01 -3.9293778E-01 -3.9244798E-01 -3.9195889E-01
 -3.9147052E-01 -3.9098284E-01 -3.9049590E-01 -3.9000964E-01
 -3.8952413E-01 -3.8903928E-01 -3.8855514E-01 -3.8807172E-01
 -3.8758901E-01 -3.8710698E-01 -3.8662565E-01 -3.8614503E-01
 -3.8566509E-01 -3.8518584E-01 -3.8470730E-01 -3.8422945E-01
 -3.8375229E-01 -3.8327584E-01 -3.8280007E-01 -3.8232496E-01
 -3.8185057E-01 -3.8137686E-01 -3.8090384E-01 -3.8043150E-01
 -3.7995985E-01 -3.7948889E-01 -3.7901857E-01 -3.7854898E-01
 -3.7808001E-01 -3.7761179E-01 -3.7714419E-01 -3.7667727E-01
 -3.7621105E-01 -3.7574548E-01 -3.7528059E-01 -3.7481639E-01
 -3.7435281E-01 -3.7388995E-01 -3.7342775E-01 -3.7296620E-01
 -3.7250534E-01 -3.7204510E-01 -3.7158555E-01 -3.7112668E-01
 -3.7066844E-01 -3.7021089E-01 -3.6975396E-01 -3.6929771E-01
 -3.6884212E-01 -3.6838716E-01 -3.6793289E-01 -3.6747926E-01
 -3.6702627E-01 -3.6657396E-01 -3.6612228E-01 -3.6567125E-01
 -3.6522087E-01 -3.6477113E-01 -3.6432204E-01 -3.6387360E-01
 -3.6342579E-01 -3.6297864E-01 -3.6253214E-01 -3.6208627E-01
 -3.6164102E-01 -3.6119643E-01 -3.6075246E-01 -3.6030915E-01
 -3.5986647E-01 -3.5942441E-01 -3.5898301E-01 -3.5854223E-01
 -3.5810205E-01 -3.5766256E-01 -3.5722366E-01 -3.5678539E-01
 -3.5634774E-01 -3.5591072E-01 -3.5547432E-01 -3.5503858E-01
 -3.5460344E-01 -3.5416892E-01 -3.5373503E-01 -3.5330176E-01
 -3.5286906E-01 -3.5243705E-01 -3.5200563E-01 -3.5157481E-01
 -3.5114461E-01 -3.5071504E-01 -3.5028607E-01 -3.4985772E-01
 -3.4942997E-01 -3.4900284E-01 -3.4857634E-01 -3.4815040E-01
 -3.4772509E-01 -3.4730041E-01 -3.4687629E-01 -3.4645280E-01
 -3.4602994E-01 -3.4560764E-01 -3.4518594E-01 -3.4476486E-01
 -3.4434438E-01 -3.4392446E-01 -3.4350517E-01 -3.4308651E-01
 -3.4266838E-01 -3.4225088E-01 -3.4183398E-01 -3.4141764E-01
 -3.4100193E-01 -3.4058678E-01 -3.4017223E-01 -3.3975828E-01
 -3.3934489E-01 -3.3893210E-01 -3.3851990E-01 -3.3810830E-01
 -3.3769724E-01 -3.3728680E-01 -3.3687696E-01 -3.3646765E-01
 -3.3605894E-01 -3.3565083E-01 -3.3524328E-01 -3.3483630E-01
 -3.3442989E-01 -3.3402407E-01 -3.3361885E-01 -3.3321416E-01
 -3.3281007E-01 -3.3240655E-01 -3.3200356E-01 -3.3160120E-01
 -3.3119938E-01 -3.3079812E-01 -3.3039746E-01 -3.2999733E-01
 -3.2959777E-01 -3.2919878E-01 -3.2880035E-01 -3.2840249E-01
 -3.2800519E-01 -3.2760844E-01 -3.2721227E-01 -3.2681665E-01
 -3.2642159E-01 -3.2602707E-01 -3.2563314E-01 -3.2523972E-01
 -3.2484689E-01 -3.2445461E-01 -3.2406288E-01 -3.2367167E-01
 -3.2328105E-01 -3.2289097E-01 -3.2250142E-01 -3.2211244E-01
 -3.2172400E-01 -3.2133612E-01 -3.2094878E-01 -3.2056198E-01
 -3.2017574E-01 -3.1979001E-01 -3.1940481E-01 -3.1902021E-01
 -3.1863609E-01 -3.1825256E-01 -3.1786951E-01 -3.1748706E-01
 -3.1710511E-01 -3.1672373E-01 -3.1634286E-01 -3.1596252E-01
 -3.1558272E-01 -3.1520346E-01 -3.1482470E-01 -3.1444651E-01
 -3.1406882E-01 -3.1369168E-01 -3.1331506E-01 -3.1293899E-01
 -3.1256339E-01 -3.1218839E-01 -3.1181386E-01 -3.1143987E-01
  1.0974264E+04  2.1847490E+04  3.2620381E+04  4.3293625E+04
  5.3867914E+04  6.4343930E+04  7.4722359E+04  8.5003867E+04
  9.5189141E+04  1.0527884E+05  1.1527363E+05  1.2517416E+05
  1.3498111E+05  1.4469512E+05  1.5431683E+05  1.6384689E+05
  1.7328594E+05  1.8263462E+05  1.9189356E+05  2.0106338E+05
  2.1014472E+05  2.1913819E+05  2.2804439E+05  2.3686397E+05
  2.4559750E+05  2.5424562E+05  2.6280891E+05  2.7128797E+05
  2.7968341E+05  2.8799581E+05  2.9622572E+05  3.0437381E+05
  3.1244056E+05  3.2042659E+05  3.2833250E+05  3.3615881E+05
  3.4390616E+05  3.5157503E+05  3.5916600E+05  3.6667962E+05
  3.7411647E+05  3.8147709E+05  3.8876200E+05  3.9597178E+05
  4.0310694E+05  4.1016800E+05  4.1715550E+05  4.2407000E+05
  4.3091200E+05  4.3768200E+05  4.4438056E+05  4.5100819E+05
  4.5756534E+05  4.6405259E+05  4.7047044E+05  4.7681931E+05
  4.8309981E+05  4.8931238E+05  4.9545750E+05  5.0153569E+05
  5.0754741E+05  5.1349316E+05  5.1937341E+05  5.2518862E+05
  5.3093931E+05  5.3662594E+05  5.4224894E+05  5.4780881E+05
  5.5330600E+05  5.5874100E+05  5.6411419E+05  5.6942612E+05
  5.7467712E+05  5.7986775E+05  5.8499844E+05  5.9006956E+05
  5.9508162E+05  6.0003506E+05  6.0493025E+05  6.0976762E+05
  6.1454769E+05  6.1927081E+05  6.2393744E+05  6.2854800E+05
  6.3310288E+05  6.3760244E+05  6.4204725E+05  6.4643756E+05
  6.5077388E+05  6.5505656E+05  6.5928600E+05  6.6346269E+05
  6.6758688E+05  6.7165912E+05  6.7567969E+05  6.7964900E+05
  6.8356744E+05  6.8743538E+05  6.9125325E+05  6.9502144E+05
  6.9874025E+05  7.0241012E+05  7.0603138E+05  7.0960438E+05
  7.1312956E+05  7.1660725E+05  7.2003781E+05  7.2342162E+05
  7.2675900E+05  7.3005031E+05  7.3329594E+05  7.3649619E+05
  7.3965144E+05  7.4276206E+05  7.4582838E+05  7.4885069E+05
  7.5182938E+05  7.5476475E+05  7.5765725E+05  7.6050706E+05
  7.6331456E+05  7.6608012E+05  7.6880406E+05  7.7148669E+05
  7.7412831E+05  7.7672931E+05  7.7928988E+05  7.8181050E+05
  7.8429131E+05  7.8673275E+05  7.8913512E+05  7.9149869E+05
  7.9382375E+05  7.9611069E+05  7.9835975E+05  8.0057119E+05
  8.0274538E+05  8.0488250E+05  8.0698306E+05  8.0904712E+05
  8.1107512E+05  8.1306738E+05  8.1502400E+05  8.1694544E+05
  8.1883188E+05  8.2068369E+05  8.2250106E+05  8.2428431E+05
  8.2603375E+05  8.2774956E+05  8.2943212E+05  8.3108162E+05
  8.3269838E+05  8.3428256E+05  8.3583462E+05  8.3735462E+05
  8.3884300E+05  8.4029988E+05  8.4172562E+05  8.4312038E+05
  8.4448450E+05  8.4581812E+05  8.4712162E+05  8.4839519E+05
  8.4963912E+05  8.5085356E+05  8.5203888E+05  8.5319519E+05
  8.5432281E+05  8.5542200E+05  8.5649300E+05  8.5753594E+05
  8.5855112E+05  8.5953888E+05  8.6049925E+05  8.6143262E+05
  8.6233912E+05  8.6321906E+05  8.6407262E+05  8.6490000E+05
  8.6570150E+05  8.6647725E+05  8.6722756E+05  8.6795256E+05
  8.6865250E+05  8.6932762E+05  8.6997812E+05  8.7060425E+05
  8.7120612E+05  8.7178400E+05  8.7233812E+05  8.7286869E+05
  8.7337588E+05  8.7385988E+05  8.7432088E+05  8.7475919E+05
  8.7517488E+05  8.7556825E+05  8.7593944E+05  8.7628869E+05
  8.7661612E+05  8.7692200E+05  8.7720644E+05  8.7746969E+05
  8.7771194E+05  8.7793338E+05  8.7813419E+05  8.7831450E+05
  8.7847456E+05  8.7861456E+05  8.7873462E+05  8.7883500E+05
  8.7891581E+05  8.7897725E+05  8.7901950E+05  8.7904275E+05
  8.7904712E+05  8.7903288E+05  8.7900012E+05  8.7894900E+05
  8.7887975E+05  8.7879250E+05  8.7868750E+05  8.7856475E+05
  8.7842456E+05  8.7826700E+05  8.7809238E+05  8.7790062E+05
  8.7769212E+05  8.7746688E+05  8.7722512E+05  8.7696700E+05
  8.7669269E+05  8.7640231E+05  8.7609600E+05  8.7577400E+05
  8.7543638E+05  8.7508325E+05  8.7471488E+05  8.7433138E+05
  8.7393281E+05  8.7351938E+05  8.7309125E+05  8.7264862E+05
  8.7219150E+05  8.7172006E+05  8.7123456E+05  8.7073500E+05
  8.7022162E+05  8.6969450E+05  8.6915375E+05  8.6859962E+05
  8.6803212E+05  8.6745144E+05  8.6685775E+05  8.6625112E+05
  8.6563169E+05  8.6499962E+05  8.6435506E+05  8.6369806E+05
  8.6302881E+05  8.6234744E+05  8.6165400E+05  8.6094875E+05
  8.6023169E+05  8.5950300E+05  8.5876275E+05  8.5801112E+05
  8.5724825E+05  8.5647419E+05  8.5568906E+05  8.5489306E+05
  8.5408625E+05  8.5326875E+05  8.5244062E+05  8.5160212E+05
  8.5075325E+05  8.4989412E+05  8.4902488E+05  8.4814562E+05
  8.4725650E+05  8.4635762E+05  8.4544900E+05  8.4453081E+05
  8.4360319E+05  8.4266619E+05  8.4172000E+05  8.4076462E+05
  8.3980019E+05  8.3882681E+05  8.3784462E+05  8.3685369E+05
  8.3585412E+05  8.3484606E+05  8.3382950E+05  8.3280469E+05
  8.3177162E+05  8.3073038E+05  8.2968112E+05  8.2862388E+05
  8.2755888E+05  8.2648606E+05  8.2540562E+05  8.2431756E+05
  8.2322206E+05  8.2211919E+05  8.2100900E+05  8.1989162E+05
  8.1876712E+05  8.1763562E+05  8.1649719E+05  8.1535188E+05
  8.1419988E+05  8.1304112E+05  8.1187581E+05  8.1070400E+05
  8.0952581E+05  8.0834125E+05  8.0715050E+05  8.0595350E+05
  8.0475044E+05  8.0354138E+05  8.0232644E+05  8.0110562E+05
  7.9987906E+05  7.9864675E+05  7.9740894E+05  7.9616550E+05
  7.9491669E+05  7.9366250E+05  7.9240300E+05  7.9113825E+05
  7.8986838E+05  7.8859338E+05  7.8731344E+05  7.8602856E+05
  7.8473881E+05  7.8344431E+05  7.8214506E+05  7.8084119E+05
  7.7953275E+05  7.7821981E+05  7.7690250E+05  7.7558075E+05
  7.7425469E+05  7.7292444E+05  7.7159006E+05  7.7025156E+05
  7.6890900E+05  7.6756250E+05  7.6621212E+05  7.6485788E+05
  7.6349988E+05  7.6213819E+05  7.6077288E+05  7.5940394E+05
  7.5803150E+05  7.5665562E+05  7.5527631E+05  7.5389369E+05
  7.5250781E+05  7.5111869E+05  7.4972638E+05  7.4833100E+05
  7.4693262E+05  7.4553125E+05  7.4412688E+05  7.4271969E+05
  7.4130969E+05  7.3989694E+05  7.3848150E+05  7.3706338E+05
  7.3564269E+05  7.3421944E+05  7.3279369E+05  7.3136556E+05
  7.2993500E+05  7.2850212E+05  7.2706700E+05  7.2562962E+05
  7.2419012E+05  7.2274844E+05  7.2130469E+05  7.1985894E+05
  7.1841119E+05  7.1696150E+05  7.1551000E+05  7.1405662E+05
  7.1260150E+05  7.1114462E+05  7.0968600E+05  7.0822581E+05
  7.0676400E+05  7.0530069E+05  7.0383581E+05  7.0236950E+05
  7.0090175E+05  6.9943262E+05  6.9796225E+05  6.9649050E+05
  6.9501756E+05  6.9354338E+05  6.9206812E+05  6.9059169E+05
  6.8911419E+05  6.8763562E+05  6.8615612E+05  6.8467569E+05
  6.8319431E+05  6.8171206E+05  6.8022900E+05  6.7874512E+05
  6.7726050E+05  6.7577512E+05  6.7428912E+05  6.7280250E+05
  6.7131525E+05  6.6982738E+05  6.6833906E+05  6.6685025E+05
  6.6536094E+05  6.6387125E+05  6.6238112E+05  6.6089069E+05
  6.5939994E+05  6.5790888E+05  6.5641762E+05  6.5492612E+05
  6.5343444E+05  6.5194262E+05  6.5045069E+05  6.4895869E+05
  6.4746662E+05  6.4597456E+05  6.4448250E+05  6.4299050E+05
  6.4149856E+05  6.4000675E+05  6.3851506E+05  6.3702356E+05
  6.3553225E+05  6.3404119E+05  6.3255038E+05  6.3105988E+05
  6.2956962E+05  6.2807975E+05  6.2659031E+05  6.2510125E+05
  6.2361256E+05  6.2212438E+05  6.2063669E+05  6.1914950E+05
  6.1766288E+05  6.1617675E+05  6.1469131E+05  6.1320644E+05
  6.1172219E+05  6.1023862E+05  6.0875581E+05  6.0727369E+05
  6.0579225E+05  6.0431162E+05  6.0283181E+05  6.0135281E+05
  5.9987469E+05  5.9839738E+05  5.9692094E+05  5.9544550E+05
  5.9397088E+05  5.9249731E+05  5.9102469E+05  5.8955306E+05
  5.8808244E+05  5.8661294E+05  5.8514444E+05  5.8367706E+05
  5.8221075E+05  5.8074562E+05  5.7928162E+05  5.7781875E+05
  5.7635712E+05  5.7489675E+05  5.7343756E+05  5.7197962E+05
  5.7052294E+05  5.6906756E+05  5.6761350E+05  5.6616075E+05
  5.6470938E+05  5.6325931E+05  5.6181069E+05  5.6036344E+05
  5.5891762E+05  5.5747325E+05  5.5603031E+05  5.5458888E+05
  5.5314888E+05  5.5171044E+05  5.5027350E+05  5.4883806E+05
  5.4740419E+05  5.4597194E+05  5.4454125E+05  5.4311212E+05
  5.4168469E+05  5.4025881E+05  5.3883462E+05  5.3741212E+05
  5.3599125E+05  5.3457212E+05  5.3315462E+05  5.3173894E+05
  5.3032494E+05  5.2891269E+05  5.2750225E+05  5.2609350E+05
  5.2468662E+05  5.2328153E+05  5.2187825E+05  5.2047678E+05
  5.1907719E+05  5.1767944E+05  5.1628356E+05  5.1488956E+05
  5.1349744E+05  5.1210722E+05  5.1071894E+05  5.0933256E+05
  5.0794819E+05  5.0656569E+05  5.0518522E+05  5.0380669E+05
  5.0243016E+05  5.0105562E+05  4.9968309E+05  4.9831256E+05
  4.9694409E+05  4.9557766E+05  4.9421328E+05  4.9285094E+05
  4.9149069E+05  4.9013247E+05  4.8877641E+05  4.8742241E+05
  4.8607050E+05  4.8472075E+05  4.8337309E+05  4.8202759E+05
  4.8068422E+05  4.7934303E+05  4.7800397E+05  4.7666709E+05
  4.7533241E+05  4.7399991E+05  4.7266956E+05  4.7134147E+05
  4.7001556E+05  4.6869191E+05  4.6737044E+05  4.6605122E+05
  4.6473425E+05  4.6341953E+05  4.6210706E+05  4.6079681E+05
  4.5948891E+05  4.5818322E+05  4.5687984E+05  4.5557878E+05
  4.5427997E+05  4.5298350E+05  4.5168931E+05  4.5039744E+05
  4.4910794E+05  4.4782069E+05  4.4653581E+05  4.4525331E+05
  4.4397309E+05  4.4269528E+05  4.4141981E+05  4.4014669E+05
  4.3887594E+05  4.3760753E+05  4.3634153E+05  4.3507791E+05
  4.3381669E+05  4.3255781E+05  4.3130141E+05  4.3004734E+05
  4.2879569E+05  4.2754647E+05  4.2629969E+05  4.2505528E+05
  4.2381331E+05  4.2257378E+05  4.2133666E+05  4.2010197E+05
  4.1886975E+05  4.1763994E+05  4.1641259E+05  4.1518769E+05
  4.1396525E+05  4.1274525E+05  4.1152772E+05  4.1031269E+05
  4.0910006E+05  4.0788994E+05  4.0668228E+05  4.0547709E+05
  4.0427441E+05  4.0307419E+05  4.0187644E+05  4.0068119E+05
  3.9948841E+05  3.9829812E+05  3.9711031E+05  3.9592506E+05
  3.9474225E+05  3.9356197E+05  3.9238419E+05  3.9120891E+05
  3.9003609E+05  3.8886581E+05  3.8769806E+05  3.8653281E+05
  3.8537006E+05  3.8420984E+05  3.8305216E+05  3.8189694E+05
  3.8074428E+05  3.7959412E+05  3.7844647E+05  3.7730138E+05
  3.7615878E+05  3.7501872E+05  3.7388119E+05  3.7274619E+05
  3.7161369E+05  3.7048372E+05  3.6935628E+05  3.6823138E+05
  3.6710903E+05  3.6598919E+05  3.6487184E+05  3.6375706E+05
  3.6264481E+05  3.6153512E+05  3.6042794E+05  3.5932328E+05
  3.5822116E+05  3.5712156E+05  3.5602453E+05  3.5493000E+05
  3.5383800E+05  3.5274856E+05  3.5166162E+05  3.5057722E+05
  3.4949538E+05  3.4841606E+05  3.4733925E+05  3.4626497E+05
  3.4519322E+05  3.4412403E+05  3.4305734E+05  3.4199319E+05
  3.4093156E+05  3.3987247E+05  3.3881591E+05  3.3776188E+05
  3.3671034E+05  3.3566134E+05  3.3461488E+05  3.3357094E+05
  3.3252950E+05  3.3149056E+05  3.3045419E+05  3.2942031E+05
  3.2838894E+05  3.2736009E+05  3.2633378E+05  3.2530994E+05
  3.2428862E+05  3.2326981E+05  3.2225356E+05  3.2123975E+05
  3.2022847E+05  3.1921969E+05  3.1821344E+05  3.1720966E+05
  3.1620838E+05  3.1520959E+05  3.1421331E+05  3.1321950E+05
  3.1222819E+05  3.1123941E+05  3.1025306E+05  3.0926922E+05
  3.0828788E+05  3.0730900E+05  3.0633259E+05  3.0535869E+05
  3.0438722E+05  3.0341828E+05  3.0245178E+05  3.0148772E+05
  3.0052619E+05  2.9956706E+05  2.9861044E+05  2.9765625E+05
  2.9670453E+05  2.9575525E+05  2.9480844E+05  2.9386406E+05
  2.9292216E+05  2.9198269E+05  2.9104566E+05  2.9011106E+05
  2.8917891E+05  2.8824919E+05  2.8732191E+05  2.8639706E+05
  2.8547459E+05  2.8455459E+05  2.8363700E+05  2.8272184E+05
  2.8180906E+05  2.8089875E+05  2.7999081E+05  2.7908528E+05
  2.7818216E+05  2.7728144E+05  2.7638309E+05  2.7548719E+05
  2.7459366E+05  2.7370250E+05  2.7281372E+05  2.7192734E+05
  2.7104334E+05  2.7016172E+05  2.6928247E+05  2.6840559E+05
  2.6753106E+05  2.6665894E+05  2.6578912E+05  2.6492169E+05
  2.6405662E+05  2.6319391E+05  2.6233350E+05  2.6147547E+05
  2.6061978E+05  2.5976642E+05  2.5891538E+05  2.5806670E+05
  2.5722033E+05  2.5637628E+05  2.5553455E+05  2.5469516E+05
  2.5385805E+05  2.5302328E+05  2.5219080E+05  2.5136062E+05
  2.5053272E+05  2.4970716E+05  2.4888386E+05  2.4806286E+05
  2.4724414E+05  2.4642772E+05  2.4561355E+05  2.4480167E+05
  2.4399206E+05  2.4318470E+05  2.4237962E+05  2.4157680E+05
  2.4077622E+05  2.3997791E+05  2.3918183E+05  2.3838800E+05
  2.3759642E+05  2.3680706E+05  2.3601994E+05  2.3523505E+05
  2.3445239E+05  2.3367194E+05  2.3289372E+05  2.3211770E+05
  2.3134389E+05  2.3057230E+05  2.2980289E+05  2.2903569E+05
  2.2827069E+05  2.2750788E+05  2.2674723E+05  2.2598880E+05
  2.2523252E+05  2.2447842E+05  2.2372650E+05  2.2297673E+05
  2.2222912E+05  2.2148369E+05  2.2074041E+05  2.1999927E+05
  2.1926027E+05  2.1852342E+05  2.1778870E+05  2.1705612E+05
  2.1632567E+05  2.1559734E+05  2.1487114E+05  2.1414706E+05
  2.1342509E+05  2.1270522E+05  2.1198747E+05  2.1127181E+05
  2.1055825E+05  2.0984678E+05  2.0913739E+05  2.0843009E+05
  2.0772488E+05  2.0702175E+05  2.0632067E+05  2.0562167E+05
  2.0492473E+05  2.0422986E+05  2.0353703E+05  2.0284627E+05
  2.0215753E+05  2.0147086E+05  2.0078620E+05  2.0010359E+05
  1.9942302E+05  1.9874445E+05  1.9806792E+05  1.9739341E+05
  1.9672091E+05  1.9605041E+05  1.9538192E+05  1.9471542E+05
  1.9405094E+05  1.9338842E+05  1.9272791E+05  1.9206938E+05
  1.9141283E+05  1.9075825E+05  1.9010562E+05  1.8945498E+05
  1.8880631E+05  1.8815958E+05  1.8751481E+05  1.8687198E+05
  1.8623111E+05  1.8559217E+05  1.8495517E+05  1.8432011E+05
  1.8368697E+05  1.8305575E+05  1.8242645E+05  1.8179906E+05
  1.8117359E+05  1.8055002E+05  1.7992836E+05  1.7930859E+05
  1.7869072E+05  1.7807473E+05  1.7746062E+05  1.7684841E+05
  1.7623806E+05  1.7562958E+05  1.7502298E+05  1.7441823E+05
  1.7381534E+05  1.7321431E+05  1.7261514E+05  1.7201781E+05
  1.7142231E+05  1.7082866E+05  1.7023684E+05  1.6964684E+05
  1.6905867E+05  1.6847233E+05  1.6788780E+05  1.6730508E+05
  1.6672416E+05  1.6614505E+05  1.6556773E+05  1.6499222E+05
  1.6441850E+05  1.6384655E+05  1.6327639E+05  1.6270800E+05
  1.6214139E+05  1.6157656E+05  1.6101348E+05  1.6045216E+05
  1.5989261E+05  1.5933480E+05  1.5877873E+05  1.5822441E+05
  1.5767183E+05  1.5712098E+05  1.5657188E+05  1.5602448E+05
  1.5547881E+05  1.5493486E+05  1.5439262E+05  1.5385211E+05
  1.5331328E+05  1.5277616E+05  1.5224073E+05  1.5170700E+05
  1.5117495E+05  1.5064459E+05  1.5011591E+05  1.4958889E+05
  1.4906356E+05  1.4853989E+05  1.4801788E+05  1.4749753E+05
  1.4697884E+05  1.4646180E+05  1.4594639E+05  1.4543264E+05
  1.4492052E+05  1.4441003E+05  1.4390117E+05  1.4339394E+05
  1.4288831E+05  1.4238433E+05  1.4188194E+05  1.4138116E+05
  1.4088198E+05  1.4038442E+05  1.3988844E+05  1.3939405E+05
  1.3890125E+05  1.3841003E+05  1.3792041E+05  1.3743234E+05
  1.3694584E+05  1.3646092E+05  1.3597756E+05  1.3549575E+05
  1.3501552E+05  1.3453681E+05  1.3405966E+05  1.3358405E+05
  1.3310997E+05  1.3263744E+05  1.3216642E+05  1.3169694E+05
  1.3122898E+05  1.3076254E+05  1.3029761E+05  1.2983419E+05
  1.2937227E+05  1.2891186E+05  1.2845295E+05  1.2799552E+05
  1.2753959E+05  1.2708514E+05  1.2663217E+05  1.2618069E+05
  1.2573066E+05  1.2528212E+05  1.2483504E+05  1.2438942E+05
  1.2394526E+05  1.2350255E+05  1.2306129E+05  1.2262147E+05
  1.2218309E+05  1.2174616E+05  1.2131066E+05  1.2087659E+05
  1.2044394E+05  1.2001272E+05  1.1958291E+05  1.1915452E+05
  1.1872753E+05  1.1830195E+05  1.1787778E+05  1.1745501E+05
  1.1703362E+05  1.1661363E+05  1.1619502E+05  1.1577780E+05
  1.1536196E+05  1.1494749E+05  1.1450993E+05  1.1409901E+05
  1.1368995E+05  1.1328277E+05  1.1287745E+05  1.1247400E+05
  1.1207239E+05  1.1167263E+05  1.1127472E+05  1.1087863E+05
  1.1048438E+05  1.1009196E+05  1.0970134E+05  1.0931255E+05
  1.0892555E+05  1.0854037E+05  1.0815697E+05  1.0777536E+05
  1.0739553E+05  1.0701748E+05  1.0664120E+05  1.0626669E+05
  1.0589393E+05  1.0552292E+05  1.0515366E+05  1.0478615E+05
  1.0442036E+05  1.0405630E+05  1.0369396E+05  1.0333334E+05
  1.0297442E+05  1.0261721E+05  1.0226170E+05  1.0190787E+05
  1.0155573E+05  1.0120526E+05  1.0085647E+05  1.0050934E+05
  1.0016387E+05  9.9820047E+04  9.9477875E+04  9.9137344E+04
  9.8798438E+04  9.8461164E+04  9.8125508E+04  9.7791469E+04
  9.7459031E+04  9.7128195E+04  9.6798961E+04  9.6471305E+04
  9.6145234E+04  9.5820734E+04  9.5497805E+04  9.5176438E+04
  9.4856625E+04  9.4538359E+04  9.4221633E+04  9.3906445E+04
  9.3592781E+04  9.3280648E+04  9.2970023E+04  9.2660906E+04
  9.2353289E+04  9.2047172E+04  9.1742539E+04  9.1439398E+04
  9.1137719E+04  9.0837516E+04  9.0538773E+04  9.0241477E+04
  8.9945641E+04  8.9651234E+04  8.9358273E+04  8.9066734E+04
  8.8776617E+04  8.8487906E+04  8.8200617E+04  8.7914719E+04
  8.7630219E+04  8.7347102E+04  8.7065359E+04  8.6785000E+04
  8.6506000E+04  8.6228367E+04  8.5952078E+04  8.5677141E+04
  8.5403539E+04  8.5131273E+04  8.4860328E+04  8.4590703E+04
  8.4322391E+04  8.4055375E+04  8.3789664E+04  8.3525242E+04
  8.3262102E+04  8.3000242E+04  8.2739648E+04  8.2480320E+04
  8.2222242E+04  8.1965414E+04  8.1709836E+04  8.1455484E+04
  8.1202359E+04  8.0950461E+04  8.0699773E+04  8.0450289E+04
  8.0202016E+04  7.9954930E+04  7.9709031E+04  7.9464305E+04
  7.9220758E+04  7.8978367E+04  7.8737148E+04  7.8497070E+04
  7.8258141E+04  7.8020344E+04  7.7783680E+04  7.7548141E+04
  7.7313719E+04  7.7080398E+04  7.6848188E+04  7.6617070E+04
  7.6387039E+04  7.6158094E+04  7.5930219E+04  7.5703406E+04
  7.5477664E+04  7.5252969E+04  7.5029320E+04  7.4806711E+04
  7.4585133E+04  7.4364586E+04  7.4145055E+04  7.3926531E+04
  7.3709016E+04  7.3492492E+04  7.3276969E+04  7.3062414E+04
  7.2848852E+04  7.2636250E+04  7.2424609E+04  7.2213930E+04
  7.2004195E+04  7.1795406E+04  7.1587547E+04  7.1380617E+04
  7.1174609E+04  7.0969516E+04  7.0765328E+04  7.0562039E+04
  7.0359648E+04  7.0158141E+04  6.9957508E+04  6.9757750E+04
  6.9558859E+04  6.9360828E+04  6.9163648E+04  6.8967312E+04
  6.8771820E+04  6.8577148E+04  6.8383312E+04  6.8190281E+04
  6.7998070E+04  6.7806656E+04  6.7616047E+04  6.7426227E+04
  6.7237188E+04  6.7048922E+04  6.6861430E+04  6.6674703E+04
  6.6488727E+04  6.6303500E+04  6.6119023E+04  6.5935281E+04
  6.5752258E+04  6.5569969E+04  6.5388391E+04  6.5207523E+04
  6.5027359E+04  6.4847887E+04  6.4669105E+04  6.4491008E+04
  6.4313586E+04  6.4136828E+04  6.3960738E+04  6.3785305E+04
  6.3610520E+04  6.3436379E+04  6.3262871E+04  6.3089996E+04
  6.2917742E+04  6.2746105E+04  6.2575078E+04  6.2404656E+04
  6.2234828E+04  6.2065594E+04  6.1896941E+04  6.1728867E+04
  6.1561363E+04  6.1394426E+04  6.1228047E+04  6.1062219E+04
  6.0896941E+04  6.0732199E+04  6.0567988E+04  6.0404305E+04
  6.0241141E+04  6.0078492E+04  5.9916352E+04  5.9754711E+04
  5.9593570E+04  5.9432914E+04  5.9272742E+04  5.9113047E+04
  5.8953820E+04  5.8795059E+04  5.8636758E+04  5.8478906E+04
  5.8321500E+04  5.8164535E+04  5.8008004E+04  5.7851898E+04
  5.7696215E+04  5.7540949E+04  5.7386090E+04  5.7231637E+04
[truncated: 667,824 more chars]
